# Supplementary material for: The regulation of oocyte maturation and ovulation in the closest sister group of vertebrates
Source: eLife. 2019 Oct 1;8:e49062. doi: 10.7554/eLife.49062 (PMC6786877; doi:10.7554/eLife.49062)
Supplement: Supplementary file 1. — DEGs (upregulated (>2 fold) or downregulated (<0.5 fold) genes) in the indicated stages of follicles are shown in each tab. Gene ID (column A), reads mapped to the cDNA library (column B-K), RPKM (column L-U), ratio (column V-AC), UniProt ID (column AD), homologous protein (column AE), and E-value (column AF) are shown. [file elife-49062-supp1.xlsx]

## Sheet: late I-early II
Upregulated genes in late stage I-early II	Set 1 (reads)					Set 2 (reads)					Set 1 (RPKM)					Set 2 (RPKM)					Set 1 (Ratio)				Set 2 (Ratio)
Gene ID	early I	late I-early II	early II-late II	late II-late III	IV	early I	late I-early II	early II-late II	late II-late III	IV	early I	late I-early II	early II-late II	late II-late III	IV	early I	late I-early II	early II-late II	late II-late III	IV	late I-early II/early I	early II-late II/late I-early II	late II-late III/early II-late II	IV/late II-late III	late I-early II/early I	early II-late II/late I-early II	late II-late III/early II-late II	IV/late II-late III	UniProt ID	Homologous protein	E-value
KH.L10.17.v1.A.nonSL6-1	3	254	170	14	0	8	279	53	9	0	0.0886058	7.84045	4.62998	0.382828	0	0.23368	7.54846	1.61188	0.283622	0	88.4868	0.590524	0.0826848	0	32.3026	0.213538	0.175957	0	Q5ZI67	sp|Q5ZI67|NHLC2_CHICK NHL repeat-containing protein 2 OS=Gallus gallus GN=NHLRC2 PE=2 SV=1	9e-10
KH.C2.456.v2.A.SL3-1	2	150	92	13	0	9	212	55	4	1	0.0468775	3.67445	1.98843	0.282106	0	0.208626	4.5518	1.32744	0.100035	0.0218002	78.384	0.541152	0.141874	0	21.8181	0.291629	0.0753593	0.217926	P54145	sp|P54145|AMT1_CAEEL Putative ammonium transporter 1 OS=Caenorhabditis elegans GN=amt-1 PE=3 SV=1	7e-20
KH.C10.145.v1.A.nonSL15-1	2	116	130	36	0	3	138	53	15	0	0.0489542	2.96745	2.93422	0.815826	0	0.0726226	3.09423	1.33583	0.391749	0	60.617	0.988799	0.278039	0	42.607	0.431718	0.293261	0	Q9UPZ6	sp|Q9UPZ6|THS7A_HUMAN Thrombospondin type-1 domain-containing protein 7A OS=Homo sapiens GN=THSD7A PE=1 SV=4	4e-09
KH.C14.523.v1.B.ND1-1	36	1939	1771	177	0	35	1847	429	64	0	2.48258	139.748	112.618	11.3008	0	2.38704	116.676	30.4632	4.70909	0	56.2913	0.805867	0.100346	0	48.8789	0.261092	0.154583	0	O64766	sp|O64766|PP185_ARATH Pentatricopeptide repeat-containing protein At2g35030, mitochondrial OS=Arabidopsis thaliana GN=PCMP-E15 PE=2 SV=1	3.5
KH.C5.665.v1.A.nonSL1-1	8	414	431	76	0	3	259	68	11	0	0.842923	45.5895	41.8759	7.4139	0	0.312615	24.9983	7.37774	1.23665	0	54.085	0.918543	0.177045	0	79.9652	0.29513	0.167619	0	P45354	sp|P45354|HXUA2_HAEIF Heme/hemopexin-binding protein OS=Haemophilus influenzae GN=hxuA PE=1 SV=1	0.16
KH.L18.67.v1.R.ND2-1	3	149	129	26	4	5	174	49	36	6	0.112704	5.85021	4.46887	0.904331	0.148078	0.185772	5.988	1.89554	1.44304	0.209651	51.9076	0.763882	0.202362	0.163743	32.2331	0.316556	0.761283	0.145284	Q9BVK6	sp|Q9BVK6|TMED9_HUMAN Transmembrane emp24 domain-containing protein 9 OS=Homo sapiens GN=TMED9 PE=1 SV=2	3e-35
KH.C8.891.v1.A.ND1-1	6	296	452	175	167	5	245	186	127	157	0.145448	7.4992	10.1038	3.92763	3.9892	0.119872	5.44047	4.64287	3.28486	3.53983	51.5593	1.34732	0.388728	1.01568	45.3857	0.853396	0.707506	1.07762	Q8NBI5	sp|Q8NBI5|S43A3_HUMAN Solute carrier family 43 member 3 OS=Homo sapiens GN=SLC43A3 PE=1 SV=2	1e-14
KH.C11.598.v1.C.nonSL5-1	26	1131	1999	510	0	29	1028	670	349	2	2.42384	110.194	171.843	44.0185	0	2.67374	87.7882	64.3164	34.7146	0.173415	45.4627	1.55945	0.256156	0	32.8336	0.732631	0.539747	0.00499544	Q9LS44	sp|Q9LS44|PCR4_ARATH Protein PLANT CADMIUM RESISTANCE 4 OS=Arabidopsis thaliana GN=PCR4 PE=3 SV=1	0.3
KH.C12.124.v1.A.ND1-1	10	401	769	194	2	9	471	337	95	2	0.245301	10.2804	17.3946	4.40592	0.0483439	0.21834	10.5836	8.51229	2.48645	0.0456305	41.9093	1.69202	0.253292	0.0109725	48.4731	0.80429	0.292101	0.0183517	Q9PUQ8	sp|Q9PUQ8|S1PR3_TAKRU Sphingosine 1-phosphate receptor 3 OS=Takifugu rubripes GN=s1pr3 PE=3 SV=1	2.9
KH.C3.468.v1.C.ND1-1	31	1235	1558	290	0	31	1110	528	168	4	0.952863	39.6736	44.1596	8.25281	0	0.942369	31.254	16.7117	5.50978	0.114355	41.6362	1.11307	0.186886	0	33.1653	0.534705	0.329697	0.0207549	B2RXV4	sp|B2RXV4|FLVC1_MOUSE Feline leukemia virus subgroup C receptor-related protein 1 OS=Mus musculus GN=Flvcr1 PE=2 SV=1	4e-13
KH.C10.145.v1.A.nonSL8-1	3	115	130	35	1	6	138	59	10	0	0.0723371	2.89803	2.89049	0.781345	0.0237603	0.143081	3.04812	1.4649	0.257274	0	40.0629	0.997397	0.270316	0.0304095	21.3035	0.480592	0.175625	0	Q69ZU6	sp|Q69ZU6|THS7A_MOUSE Thrombospondin type-1 domain-containing protein 7A OS=Mus musculus GN=Thsd7a PE=2 SV=2	2e-10
KH.C10.456.v1.A.nonSL2-1	830	29834	45276	10711	18	407	27478	16088	9974	71	92.1689	3462.45	4636.21	1101.21	1.96966	44.6983	2795.15	1839.61	1181.77	7.33315	37.5664	1.339	0.237524	0.00178862	62.5336	0.658143	0.642402	0.00620524
KH.C9.40.v1.A.SL1-1	11	395	407	114	17	15	257	96	50	10	0.4391	16.4791	14.9814	4.21318	0.6687	0.592178	9.3976	3.94601	2.12959	0.371276	37.5293	0.909117	0.281227	0.158716	15.8696	0.419896	0.539682	0.174341	Q92502	sp|Q92502|STAR8_HUMAN StAR-related lipid transfer protein 8 OS=Homo sapiens GN=STARD8 PE=1 SV=2	1.2
KH.C1.440.v2.A.SL2-1	7447	261762	358324	87173	66	4917	215816	157654	30596	111	570.9	20972.6	25330.5	6187.23	4.9858	372.794	15155.7	12445.2	2502.65	7.91458	36.736	1.20779	0.24426	0.000805821	40.6543	0.821155	0.201094	0.00316248	Q6B4J5	sp|Q6B4J5|EXSA_BACCE Spore coat assembly protein ExsA OS=Bacillus cereus GN=exsA PE=2 SV=1	2e-09
KH.L20.6.v1.B.SL1-1	44	1403	1815	410	4	67	1248	986	233	9	1.55865	51.9421	59.2872	13.4467	0.139626	2.34726	40.4971	35.9658	8.80659	0.296527	33.3251	1.14141	0.226806	0.0103837	17.2529	0.888108	0.24486	0.033671	Q8GV43	sp|Q8GV43|PLCD6_ARATH Phosphoinositide phospholipase C 6 OS=Arabidopsis thaliana GN=PLC6 PE=2 SV=2	1.4
KH.C1.650.v1.A.ND1-1	4	125	77	8	0	14	133	54	9	0	0.181228	5.91892	3.21696	0.335576	0	0.627314	5.5199	2.51928	0.435076	0	32.66	0.543505	0.104315	0	8.79926	0.4564	0.172698	0	Q97EC3	sp|Q97EC3|Y3190_CLOAB Putative ATP:guanido phosphotransferase CA_C3190 OS=Clostridium acetobutylicum (strain ATCC 824 / DSM 792 / JCM 1419 / LMG 5710 / VKM B-1787) GN=CA_C3190 PE=3 SV=1	4.3
KH.L25.4.v1.A.SL1-1	5	154	469	776	309	8	178	336	402	312	0.119041	3.8319	10.2965	17.1051	7.24933	0.188368	3.88205	8.23728	10.212	6.90889	32.1897	2.68704	1.66125	0.423812	20.6088	2.12189	1.23973	0.676547	Q6DDI6	sp|Q6DDI6|TBC31_XENLA TBC1 domain family member 31 OS=Xenopus laevis GN=tbc1d31 PE=2 SV=1	5.8
KH.L172.11.v1.R.ND1-1	11	329	430	237	0	13	235	305	123	0	0.470612	14.7107	16.964	9.38758	0	0.550053	9.20983	13.4365	5.61477	0	31.2586	1.15317	0.553384	0	16.7435	1.45893	0.417873	0	Q23933	sp|Q23933|DEC1_DROER Defective chorion-1 protein (Fragments) OS=Drosophila erecta GN=dec-1 PE=3 SV=2	4.8
KH.C4.483.v1.A.ND1-1	63	1864	1880	188	0	46	2316	453	83	1	6.37131	197.015	175.321	17.6028	0	4.60083	214.556	47.1741	8.95618	0.094062	30.9223	0.889886	0.100403	0	46.6341	0.219869	0.189854	0.0105025
KH.S432.1.v1.C.SL2-1	16375	477776	703571	202360	151	13849	364451	401450	65991	247	2119.73	64638.1	83983.7	24252.6	19.2614	1772.99	43216.6	53511.4	9114.64	29.7386	30.4936	1.29929	0.288777	0.000794198	24.3749	1.23821	0.170331	0.00326274	O55103	sp|O55103|PRAX_MOUSE Periaxin OS=Mus musculus GN=Prx PE=2 SV=1	0.003
KH.C4.340.v1.A.ND1-1	324	9335	8762	1203	6	233	8728	1689	323	12	39.6743	1194.66	989.365	136.385	0.723982	28.217	979.022	212.966	42.2011	1.3667	30.1117	0.828155	0.137851	0.00530838	34.6962	0.21753	0.198158	0.0323853
KH.C12.365.v2.A.SL4-2	40	1140	2043	456	0	18	890	879	187	3	1.75779	52.3575	82.7875	18.5527	0	0.782295	35.827	39.7753	8.7681	0.122618	29.7859	1.5812	0.224101	0	45.7973	1.1102	0.220441	0.0139846	Q9VS60	sp|Q9VS60|SMSR1_DROME Sphingomyelin synthase-related 1 OS=Drosophila melanogaster GN=SMSr PE=1 SV=2	0.001
KH.C12.684.v1.A.SL2-1	15	405	387	64	1	16	260	104	32	0	2.36797	66.8199	56.3358	9.35405	0.155559	2.49801	37.5985	16.9058	5.39002	0	28.2182	0.843099	0.166041	0.0166302	15.0514	0.449639	0.318828	0	C5BHH2	sp|C5BHH2|HLDE_EDWI9 Bifunctional protein HldE OS=Edwardsiella ictaluri (strain 93-146) GN=hldE PE=3 SV=1	1.1
KH.S473.1.v1.B.ND1-1	168	4500	4462	1022	3	77	2668	1354	583	6	7.48436	209.519	183.301	42.1533	0.131698	3.39255	108.879	62.1128	27.7122	0.248612	27.9943	0.874862	0.229968	0.00312426	32.0936	0.570475	0.446159	0.00897124	Q9V496	sp|Q9V496|APLP_DROME Apolipophorins OS=Drosophila melanogaster GN=Rfabg PE=1 SV=2	2.1
KH.C12.599.v1.A.SL2-1	3859	102251	119857	26922	36	2360	73919	38854	10694	72	539.63	14943.6	15455.2	3485.49	4.96062	326.38	9468.7	5594.66	1595.58	9.3644	27.6923	1.03423	0.225523	0.00142322	29.0113	0.590858	0.285196	0.00586897	Q8N5Z5	sp|Q8N5Z5|KCD17_HUMAN BTB/POZ domain-containing protein KCTD17 OS=Homo sapiens GN=KCTD17 PE=1 SV=3	9.9
KH.C6.262.v1.A.nonSL4-1	3090	80171	105551	26250	28	2780	76954	57619	16076	83	499.996	13557.9	15749.2	3932.54	4.46456	444.881	11406.5	9600.43	2775.51	12.4914	27.116	1.16163	0.249697	0.00113529	25.6395	0.841663	0.289102	0.00450059	Q2TBR7	sp|Q2TBR7|CENPS_BOVIN Centromere protein S OS=Bos taurus GN=APITD1 PE=2 SV=1	5.2
KH.S2128.1.v1.C.ND1-1	1472	37470	41376	5646	31	1792	49204	18288	3202	44	77.5489	2063.09	2010.04	275.387	1.60932	93.3676	2374.55	992.09	179.989	2.15599	26.6037	0.974288	0.137006	0.00584383	25.4323	0.417801	0.181424	0.0119785	Q8N556	sp|Q8N556|AFAP1_HUMAN Actin filament-associated protein 1 OS=Homo sapiens GN=AFAP1 PE=1 SV=2	0.9
KH.C12.397.v1.A.SL1-1	17	430	405	70	1	22	283	104	23	0	2.28552	60.4187	50.2088	8.71304	0.132479	2.92516	34.8527	14.3975	3.29929	0	26.4354	0.831016	0.173536	0.0152047	11.9148	0.413096	0.229157	0	P41757	sp|P41757|PGK_CANMA Phosphoglycerate kinase OS=Candida maltosa GN=PGK1 PE=3 SV=1	0.31
KH.L153.57.v2.A.SL2-1	16	389	670	215	4	13	346	330	211	11	0.561513	14.2678	21.6822	6.98576	0.138329	0.451205	11.1232	11.9253	7.90094	0.359053	25.4095	1.51966	0.322189	0.0198015	24.6522	1.07212	0.662534	0.0454443	Q03400	sp|Q03400|SANT_PLAF7 S-antigen protein OS=Plasmodium falciparum (isolate 3D7) GN=PF10_0343 PE=2 SV=2	3e-22
KH.L44.10.v2.A.nonSL5-1	8944	214767	274038	68777	75	7853	198890	142521	37132	253	1239.23	31099.4	35012.1	8822.61	10.2398	1076.08	25243.2	20333.6	5489.38	32.6036	25.0958	1.12581	0.251987	0.00116063	23.4585	0.805507	0.269966	0.00593939	P80685	sp|P80685|CUG1A_TENMO Pupal cuticle protein G1A OS=Tenebrio molitor PE=1 SV=1	8
KH.L87.1.v1.A.ND1-1	22	527	525	63	1	31	601	182	20	3	0.358288	8.96987	7.88419	0.949915	0.016048	0.4993	8.96596	3.05209	0.347533	0.0454419	25.0354	0.878964	0.120484	0.0168941	17.9571	0.340409	0.113867	0.130756	P20693	sp|P20693|FCER2_MOUSE Low affinity immunoglobulin epsilon Fc receptor OS=Mus musculus GN=Fcer2 PE=2 SV=1	5e-05
KH.C1.1047.v1.A.ND1-1	46	1080	1256	157	9	46	1124	393	99	10	6.47244	158.818	162.963	20.4524	1.24786	6.40116	144.874	56.9403	14.8628	1.30869	24.5376	1.0261	0.125504	0.0610126	22.6324	0.393034	0.261025	0.088051	Q1GY95	sp|Q1GY95|UPPP_METFK Undecaprenyl-diphosphatase OS=Methylobacillus flagellatus (strain KT / ATCC 51484 / DSM 6875) GN=uppP PE=3 SV=1	4.6
KH.C9.477.v2.A.SL2-1	5	117	132	92	0	9	137	102	64	0	0.157864	3.8607	3.84306	2.68929	0	0.281027	3.96231	3.31613	2.15601	0	24.4558	0.99543	0.699778	0	14.0994	0.836919	0.650159	0	Q5R7B5	sp|Q5R7B5|KCRS_PONAB Creatine kinase S-type, mitochondrial OS=Pongo abelii GN=CKMT2 PE=2 SV=1	5e-32
KH.C3.255.v1.C.SL1-1	21	481	450	73	8	18	393	167	68	5	0.809055	19.3674	15.9868	2.60386	0.303711	0.685839	13.8696	6.6251	2.79527	0.179166	23.9382	0.825449	0.162876	0.116639	20.2229	0.47767	0.421922	0.064096	Q8N5B7	sp|Q8N5B7|CERS5_HUMAN Ceramide synthase 5 OS=Homo sapiens GN=CERS5 PE=2 SV=1	2e-19
KH.S1182.1.v1.A.nonSL1-1	14	317	236	40	0	11	484	128	15	0	0.571956	13.5351	8.89069	1.51297	0	0.444445	18.1131	5.3847	0.653856	0	23.6645	0.656864	0.170174	0	40.7545	0.297282	0.121429	0	Q61282	sp|Q61282|PGCA_MOUSE Aggrecan core protein OS=Mus musculus GN=Acan PE=1 SV=2	0.16
KH.S2047.1.v1.A.nonSL3-1	1461	32912	51271	20924	22	1192	28831	25089	12404	77	281.675	6631.61	9115.05	3734.89	4.17958	227.282	5091.8	4980.79	2551.62	13.8075	23.5435	1.37449	0.40975	0.00111906	22.403	0.978199	0.512292	0.00541126	Q7Z5J4	sp|Q7Z5J4|RAI1_HUMAN Retinoic acid-induced protein 1 OS=Homo sapiens GN=RAI1 PE=1 SV=2	0.72
KH.S930.3.v1.A.ND1-1	2989	65909	106344	42038	32	2057	61323	48205	25283	167	301.61	6950.74	9895.14	3927.33	3.18187	205.279	5668.35	5008.74	2722.11	15.6734	23.0454	1.42361	0.396895	0.000810186	27.6129	0.883634	0.543471	0.00575781	Q29605	sp|Q29605|CP19A_RABIT Cytochrome P450 19A1 OS=Oryctolagus cuniculus GN=CYP19A1 PE=2 SV=1	3.4
KH.L30.1.v1.A.nonSL2-1	110	2418	3116	1018	3	81	1792	1596	473	9	18.5271	425.634	483.95	158.744	0.497906	13.4924	276.481	276.799	85.0025	1.40988	22.9736	1.13701	0.328017	0.00313654	20.4916	1.00115	0.307091	0.0165864	Q66GP0	sp|Q66GP0|Y5738_ARATH BTB/POZ domain-containing protein At5g67385 OS=Arabidopsis thaliana GN=At5g67385 PE=2 SV=2	1.3
KH.L134.24.v1.A.SL1-1	54	1177	1304	238	6	57	1757	529	120	6	2.37995	54.2145	52.9956	9.71148	0.260577	2.4845	70.9346	24.0074	5.64301	0.245952	22.7797	0.977516	0.183251	0.0268319	28.5509	0.338445	0.235053	0.0435853	Q8WWU5	sp|Q8WWU5|TCP11_HUMAN T-complex protein 11 homolog OS=Homo sapiens GN=TCP11 PE=2 SV=1	5.7
KH.C6.94.v2.A.SL1-1	13	280	277	37	2	7	314	87	22	12	0.57801	13.0112	11.3569	1.5231	0.0876262	0.307809	12.789	3.98316	1.04369	0.496249	22.5103	0.87286	0.134112	0.0575314	41.5484	0.311454	0.262025	0.475476	B3DMA0	sp|B3DMA0|P5I11_RAT Tumor protein p53-inducible protein 11 OS=Rattus norvegicus GN=Tp53i11 PE=2 SV=1	0.023
KH.L30.1.v1.A.nonSL21-1	119	2560	3156	964	3	96	1883	1596	479	4	18.6559	419.445	456.241	139.92	0.463449	14.8844	270.416	257.643	80.1236	0.58325	22.4833	1.08773	0.306681	0.00331223	18.1678	0.952766	0.310987	0.00727937	A8FHR5	sp|A8FHR5|HISZ_BACP2 ATP phosphoribosyltransferase regulatory subunit OS=Bacillus pumilus (strain SAFR-032) GN=hisZ PE=3 SV=1	2.7
KH.S2577.1.v1.B.ND1-1	7	150	184	60	0	2	123	118	33	1	0.209616	4.69445	5.08082	1.66347	0	0.0592308	3.374	3.63853	1.05438	0.0278518	22.3954	1.0823	0.327401	0	56.9637	1.0784	0.289782	0.0264153	O00602	sp|O00602|FCN1_HUMAN Ficolin-1 OS=Homo sapiens GN=FCN1 PE=1 SV=2	1e-11
KH.C1.3.v1.A.ND3-1	7008	146721	191504	64736	68	6594	121818	123997	39381	244	577.295	12631.7	14546.9	4937.24	5.51981	537.209	9192.39	10518	3461.36	18.6947	21.8809	1.15162	0.339402	0.00111799	17.1114	1.1442	0.32909	0.00540098	P08677	sp|P08677|CSP_PLAVB Circumsporozoite protein OS=Plasmodium vivax (strain Belem) PE=3 SV=2	0.002
KH.C10.198.v1.A.ND1-1	41	851	816	407	84	46	640	340	159	99	0.828912	17.9813	15.2126	7.61823	1.67346	0.919756	11.8527	7.07816	3.42987	1.8616	21.6926	0.846025	0.500784	0.219665	12.8868	0.597176	0.484571	0.54276	P0C6X1	sp|P0C6X1|R1AB_CVH22 Replicase polyprotein 1ab OS=Human coronavirus 229E GN=rep PE=1 SV=1	0.58
KH.C8.15.v1.A.ND1-1	31	639	572	127	2	37	474	187	58	10	1.56058	33.6195	26.5527	5.9192	0.0992124	1.84211	21.8582	9.69354	3.11536	0.46822	21.543	0.789801	0.222923	0.0167611	11.8659	0.443473	0.321385	0.150294	Q9HBT6	sp|Q9HBT6|CAD20_HUMAN Cadherin-20 OS=Homo sapiens GN=CDH20 PE=2 SV=2	0.25
KH.C2.891.v1.A.ND1-1	92	1895	1995	404	3	76	3093	1664	269	1	9.56022	205.805	191.166	38.8684	0.307194	7.81059	294.424	178.053	29.8255	0.0966509	21.5272	0.928873	0.203322	0.00790345	37.6955	0.604752	0.167509	0.00324054
KH.C9.318.v1.A.ND1-1	99	2004	2121	306	1	84	1883	773	161	1	3.6826	77.9082	72.7526	10.5384	0.0366548	3.09022	64.1627	29.6084	6.39001	0.0345975	21.1558	0.933825	0.144853	0.00347821	20.7632	0.461459	0.215817	0.00541432
KH.C11.382.v2.R.ND2-2	6	120	170	43	0	3	139	77	49	0	0.823766	17.2187	21.5224	5.46583	0	0.407347	17.4816	10.8858	7.17802	0	20.9024	1.24994	0.25396	0	42.9157	0.622701	0.659394	0	P0CS96	sp|P0CS96|Y503_ENCCU UPF0328 protein ECU05_0030 OS=Encephalitozoon cuniculi (strain GB-M1) GN=ECU05_0030 PE=3 SV=1	1.3
KH.C9.837.v1.A.SL1-1	17	329	476	109	25	11	369	223	72	30	0.687084	13.8971	17.7401	4.07871	0.995664	0.439687	13.6616	9.28074	3.10491	1.12774	20.2261	1.27654	0.229914	0.244113	31.0711	0.679332	0.334555	0.36321
KH.C7.306.v1.A.SL1-1	12	223	109	17	0	24	176	30	4	1	0.297096	5.77014	2.48846	0.389672	0	0.587648	3.99155	0.76481	0.105665	0.0230272	19.4218	0.431265	0.156592	0	6.79241	0.191607	0.138159	0.217926	A1S1Z4	sp|A1S1Z4|SELU_SHEAM tRNA 2-selenouridine synthase OS=Shewanella amazonensis (strain ATCC BAA-1098 / SB2B) GN=selU PE=3 SV=1	0.19
KH.L153.83.v1.R.ND1-1	8	144	207	108	5	11	242	145	80	2	0.176035	3.31161	4.20019	2.20023	0.108416	0.239383	4.87796	3.28545	1.87826	0.0409323	18.8122	1.26832	0.523841	0.0492746	20.3772	0.673529	0.571691	0.0217926	P11166	sp|P11166|GTR1_HUMAN Solute carrier family 2, facilitated glucose transporter member 1 OS=Homo sapiens GN=SLC2A1 PE=1 SV=2	0.063
KH.C7.438.v1.A.SL1-1	8	142	204	179	0	12	198	259	77	0	0.19656	3.64636	4.62194	4.07187	0	0.291593	4.4564	6.55273	2.01861	0	18.5509	1.26755	0.880987	0	15.2829	1.47041	0.308057	0	Q95XM2	sp|Q95XM2|PHM_CAEEL Probable peptidylglycine alpha-hydroxylating monooxygenase Y71G12B.4 OS=Caenorhabditis elegans GN=Y71G12B.4 PE=1 SV=1	2e-22
KH.C11.736.v1.A.ND1-1	7	123	178	70	0	8	110	88	45	1	0.149317	2.7421	3.50123	1.38244	0	0.168769	2.1494	1.93291	1.02419	0.0198398	18.3643	1.27684	0.394843	0	12.7358	0.899277	0.52987	0.0193712	Q53G59	sp|Q53G59|KLH12_HUMAN Kelch-like protein 12 OS=Homo sapiens GN=KLHL12 PE=1 SV=2	3e-19
KH.C4.132.v1.A.SL1-1	13	226	310	88	54	13	184	138	34	54	0.333896	6.06656	7.34206	2.0926	1.3667	0.330219	4.32911	3.64975	0.931758	1.28999	18.169	1.21025	0.285015	0.653112	13.1098	0.843072	0.255293	1.38447	Q56112	sp|Q56112|SYN_SALTI Asparagine--tRNA ligase OS=Salmonella typhi GN=asnS PE=3 SV=3	0.12
KH.S1697.2.v1.C.ND1-1	43	729	628	102	6	46	514	176	50	11	1.90254	33.7101	25.6221	4.17832	0.261595	2.01286	20.8326	8.01855	2.36044	0.452673	17.7184	0.760072	0.163075	0.0626077	10.3497	0.384905	0.294372	0.191775	P60328	sp|P60328|KR123_HUMAN Keratin-associated protein 12-3 OS=Homo sapiens GN=KRTAP12-3 PE=1 SV=2	1.1
KH.L170.22.v1.A.ND1-1	53	898	876	111	16	33	790	278	61	6	2.39648	42.4367	36.5251	4.64683	0.712903	1.47572	32.7219	12.9438	2.94296	0.252334	17.7079	0.860697	0.127223	0.153417	22.1736	0.395568	0.227365	0.0857415	B0WC46	sp|B0WC46|TRET1_CULQU Facilitated trehalose transporter Tret1 OS=Culex quinquefasciatus GN=Tret1 PE=3 SV=1	1e-19
KH.C2.700.v1.A.SL1-1	13	219	243	145	22	26	218	79	81	19	0.309345	5.4464	5.33205	3.1945	0.515863	0.611876	4.75192	1.93572	2.05656	0.420512	17.6063	0.979005	0.599112	0.161485	7.76615	0.407356	1.06242	0.204474	Q9VUL9	sp|Q9VUL9|FUCTA_DROME Glycoprotein 3-alpha-L-fucosyltransferase A OS=Drosophila melanogaster GN=FucTA PE=1 SV=2	5e-07
KH.C7.180.v1.C.SL1-1	8	133	150	91	4	12	105	138	43	14	0.281411	4.88954	4.86553	2.96365	0.138651	0.417467	3.3834	4.99858	1.61389	0.458041	17.3751	0.99509	0.609111	0.0467838	8.10459	1.47738	0.322871	0.283811	P35406	sp|P35406|DRD1_CARAU D(1) dopamine receptor OS=Carassius auratus PE=2 SV=1	0.001
KH.C8.762.v1.A.SL1-1	22	351	415	60	3	10	384	176	48	0	0.967725	16.1362	16.8332	2.44352	0.130036	0.43503	15.473	7.97184	2.25282	0	16.6744	1.04319	0.145161	0.0532166	35.5676	0.515211	0.282597	0	P21441	sp|P21441|MDR_LEITA Multidrug resistance protein OS=Leishmania tarentolae GN=PGPA PE=3 SV=2	7.5
KH.C11.522.v1.A.SL1-1	218	3442	2454	844	677	149	1904	534	508	698	2.57413	42.4768	26.7201	9.22682	7.87726	1.74001	20.5947	6.49281	6.40021	7.66577	16.5014	0.629052	0.345314	0.853735	11.836	0.315267	0.985739	1.19774	Q921L5	sp|Q921L5|COG2_MOUSE Conserved oligomeric Golgi complex subunit 2 OS=Mus musculus GN=Cog2 PE=2 SV=2	5e-62
KH.C1.30.v1.A.nonSL5-1	11	169	180	60	36	17	323	114	53	34	0.217727	3.49602	3.28535	1.09953	0.702158	0.332782	5.85647	2.3235	1.11932	0.625929	16.0568	0.939742	0.334676	0.638599	17.5985	0.39674	0.481738	0.559207	Q6AYK2	sp|Q6AYK2|JMJD6_RAT Bifunctional arginine demethylase and lysyl-hydroxylase JMJD6 OS=Rattus norvegicus GN=Jmjd6 PE=2 SV=2	0.006
KH.C9.849.v1.A.ND1-1	1273	19350	17113	3011	10	1591	19700	5760	890	22	162.011	2573.73	2008.31	354.783	1.25409	200.252	2296.65	754.841	120.854	2.60414	15.8862	0.780311	0.176657	0.00353481	11.4688	0.32867	0.160106	0.0215478	Q54B27	sp|Q54B27|EXOC6_DICDI Exocyst complex component 6 OS=Dictyostelium discoideum GN=exoc6 PE=3 SV=1	4.2
KH.C8.764.v1.A.ND1-1	39	590	481	233	35	50	1244	317	131	51	0.881725	13.9408	10.0277	4.87708	0.779738	1.11797	25.7633	7.3798	3.16007	1.07242	15.8108	0.719309	0.486359	0.159878	23.0448	0.286446	0.428205	0.339366	Q13591	sp|Q13591|SEM5A_HUMAN Semaphorin-5A OS=Homo sapiens GN=SEMA5A PE=1 SV=3	1.6
KH.L4.26.v1.C.SL2-1	18	268	306	127	40	16	352	146	100	53	0.391704	6.09518	6.14039	2.55873	0.857744	0.344347	7.01684	3.27156	2.32189	1.07272	15.5607	1.00742	0.416705	0.335222	20.3772	0.466245	0.709719	0.462004	Q00910	sp|Q00910|SO2A1_RAT Solute carrier organic anion transporter family member 2A1 OS=Rattus norvegicus GN=Slco2a1 PE=1 SV=3	9e-11
KH.C5.112.v3.R.ND3-1	24	353	329	72	0	40	263	112	27	2	0.479229	7.3667	6.05782	1.33107	0	0.789918	4.81062	2.30286	0.575244	0.0371439	15.372	0.822326	0.219727	0	6.09002	0.478703	0.249796	0.0645708	Q28943	sp|Q28943|DPYD_PIG Dihydropyrimidine dehydrogenase [NADP(+)] OS=Sus scrofa GN=DPYD PE=1 SV=1	2e-179
KH.C8.281.v1.A.SL1-1	16	234	252	62	2	4	199	120	62	14	0.562385	8.59598	8.16776	2.01762	0.0692716	0.139048	6.40737	4.34322	2.32521	0.457686	15.2849	0.950183	0.247023	0.0343333	46.0804	0.677847	0.535365	0.196837	P05530	sp|P05530|MCBG_ECOLX Protein McbG OS=Escherichia coli GN=mcbG PE=4 SV=1	3.6
KH.C8.521.v2.B.SL2-1	16	233	190	19	1	12	264	62	16	3	0.369289	5.62041	4.04379	0.406008	0.0227435	0.273916	5.58166	1.47351	0.394024	0.0644011	15.2196	0.719483	0.100403	0.0560174	20.3772	0.263992	0.267404	0.163445	Q9W596	sp|Q9W596|FUTSC_DROME Microtubule-associated protein futsch OS=Drosophila melanogaster GN=futsch PE=1 SV=4	1.1
KH.L170.42.v2.A.ND2-1	8	116	183	230	80	13	135	130	140	86	0.642654	9.73893	13.5559	17.1061	6.3327	1.03281	9.93423	10.7534	11.9997	6.42557	15.1542	1.39192	1.26189	0.370202	9.61863	1.08246	1.1159	0.535476	Q5R7U4	sp|Q5R7U4|GBG2_PONAB Guanine nucleotide-binding protein G(I)/G(S)/G(O) subunit gamma-2 OS=Pongo abelii GN=GNG2 PE=3 SV=3	3e-05
KH.C7.517.v1.C.ND1-1	1579	22474	22436	4690	11	2498	35398	15843	3133	119	227.834	3389.09	2985.18	626.534	1.56402	356.467	4678.74	2353.92	482.34	15.9702	14.8753	0.880821	0.209881	0.0024963	13.1253	0.503109	0.20491	0.0331098
KH.C3.435.v1.R.ND2-1	9	127	63	13	2	6	239	56	9	0	0.376861	5.55788	2.43259	0.503985	0.0825241	0.248474	9.16748	2.41459	0.402104	0	14.7478	0.437683	0.207181	0.163743	36.8952	0.263387	0.166531	0	Q7ZX53	sp|Q7ZX53|S22FL_XENLA Solute carrier family 22 member 15-like OS=Xenopus laevis GN=slc22a15b PE=2 SV=1	4e-05
KH.L7.20.v1.R.ND1-1	38	534	384	43	1	53	679	127	25	0	0.846862	12.4376	7.89131	0.887223	0.0219604	1.16814	13.8616	2.9144	0.594464	0	14.6867	0.634472	0.11243	0.0247519	11.8663	0.210251	0.203974	0	P23611	sp|P23611|IRF8_MOUSE Interferon regulatory factor 8 OS=Mus musculus GN=Irf8 PE=1 SV=1	1e-23
KH.C5.552.v1.R.ND1-1	11	153	268	194	28	18	233	210	107	45	0.146281	2.12643	3.28638	2.38853	0.366914	0.236732	2.83833	2.87561	1.51822	0.556586	14.5367	1.54549	0.726797	0.153615	11.9896	1.01313	0.527964	0.366605	Q96DX8	sp|Q96DX8|RTP4_HUMAN Receptor-transporting protein 4 OS=Homo sapiens GN=RTP4 PE=2 SV=3	0.19
KH.S390.6.v2.A.SL1-1	67	930	1370	737	229	86	943	517	245	229	1.12931	16.3827	21.2935	11.5011	3.80351	1.43359	14.56	8.97314	4.40615	3.59003	14.5069	1.29975	0.540124	0.330708	10.1563	0.616286	0.491038	0.814777	P09055	sp|P09055|ITB1_MOUSE Integrin beta-1 OS=Mus musculus GN=Itgb1 PE=1 SV=1	9e-60
KH.S936.1.v1.A.SL1-1	33	450	460	180	23	39	735	298	72	25	0.691232	9.85119	8.88498	3.49074	0.474733	0.807913	14.103	6.42751	1.60916	0.487052	14.2516	0.90192	0.392881	0.135998	17.456	0.455756	0.250355	0.302675	Q67XX3	sp|Q67XX3|FB252_ARATH F-box protein At5g06550 OS=Arabidopsis thaliana GN=At5g06550 PE=2 SV=1	0.17
KH.C1.30.v1.A.nonSL13-1	13	170	187	78	22	26	378	98	46	38	0.25833	3.53058	3.42659	1.43503	0.43079	0.51097	6.88076	2.00528	0.975317	0.70233	13.667	0.970544	0.418793	0.300196	13.4661	0.291432	0.486375	0.720104	Q5ZMK5	sp|Q5ZMK5|JMJD6_CHICK Bifunctional arginine demethylase and lysyl-hydroxylase JMJD6 OS=Gallus gallus GN=JMJD6 PE=2 SV=1	0.4
KH.C9.513.v1.A.ND1-1	2737	35621	31969	5002	21	3319	37764	10825	1263	51	380.385	5173.94	4097.01	643.617	2.87594	456.191	4807.73	1549.15	187.287	6.59242	13.6018	0.791855	0.157095	0.0044684	10.5389	0.322221	0.120897	0.0351995	Q9JTH9	sp|Q9JTH9|HISX_NEIMA Histidinol dehydrogenase OS=Neisseria meningitidis serogroup A / serotype 4A (strain Z2491) GN=hisD PE=3 SV=1	3.5
KH.C4.539.v1.A.ND1-1	28	362	523	196	19	45	481	351	91	20	0.36475	4.92846	6.28242	2.36389	0.243895	0.579749	5.73978	4.70826	1.26484	0.242322	13.5119	1.27472	0.376271	0.103175	9.90046	0.820287	0.268642	0.191584	P81270	sp|P81270|ERG_MOUSE Transcriptional regulator ERG OS=Mus musculus GN=Erg PE=1 SV=2	6e-58
KH.C10.434.v2.A.nonSL4-1	14	181	671	770	136	15	216	470	752	143	0.417577	5.64226	18.4552	21.2635	3.99723	0.442477	5.90168	14.4352	23.9322	3.96708	13.5119	3.27089	1.15216	0.187986	13.3378	2.44595	1.6579	0.165763	Q8K3X2	sp|Q8K3X2|FCL_CRIGR GDP-L-fucose synthase OS=Cricetulus griseus GN=TSTA3 PE=2 SV=1	2e-88
KH.C2.1005.v1.A.ND1-1	11	138	221	71	0	14	286	181	48	3	0.758566	9.94595	14.0534	4.53309	0	0.954815	18.0668	12.8528	3.53182	0.192419	13.1115	1.41298	0.322561	0	18.9217	0.711404	0.274791	0.0544816	A4RFH6	sp|A4RFH6|EIF3D_MAGO7 Eukaryotic translation initiation factor 3 subunit D OS=Magnaporthe oryzae (strain 70-15 / ATCC MYA-4617 / FGSC 8958) GN=MGG_00341 PE=3 SV=1	2.3
KH.C8.821.v1.A.ND1-1	216	2688	1115	120	39	146	3796	536	70	48	7.3471	95.5559	34.9724	3.77901	1.30719	4.9114	118.277	18.7734	2.54048	1.51855	13.0059	0.365989	0.108057	0.345908	24.0822	0.158724	0.135323	0.597741	B5FXE5	sp|B5FXE5|AIFM2_TAEGU Apoptosis-inducing factor 2 OS=Taeniopygia guttata GN=AIFM2 PE=2 SV=1	2e-07
KH.C12.8.v1.A.SL3-1	50	616	965	436	188	65	601	472	194	204	0.802748	10.3361	14.2865	6.48084	2.97426	1.03208	8.83887	7.80312	3.32328	3.04625	12.8759	1.38219	0.453634	0.458932	8.56414	0.882818	0.425892	0.916638	Q96NU1	sp|Q96NU1|SAM11_HUMAN Sterile alpha motif domain-containing protein 11 OS=Homo sapiens GN=SAMD11 PE=2 SV=3	2e-07
KH.C9.795.v1.A.nonSL2-1	1905	23094	23705	5114	26	2274	23612	10125	1404	33	143.85	1822.55	1650.61	357.529	1.93464	169.823	1633.28	787.276	113.12	2.31769	12.6698	0.905656	0.216604	0.00541115	9.61756	0.482021	0.143685	0.0204888	P16027	sp|P16027|DHM1_METEA Methanol dehydrogenase [cytochrome c] subunit 1 OS=Methylobacterium extorquens (strain ATCC 14718 / DSM 1338 / AM1) GN=moxF PE=1 SV=1	0.25
KH.C1.85.v1.A.SL1-1	13	157	125	75	79	9	107	51	73	78	0.744617	9.39844	6.6022	3.97728	4.45891	0.509827	5.61419	3.00799	4.46138	4.15538	12.6218	0.702478	0.602418	1.1211	11.0119	0.535784	1.48317	0.931411	O95563	sp|O95563|MPC2_HUMAN Mitochondrial pyruvate carrier 2 OS=Homo sapiens GN=MPC2 PE=1 SV=1	9e-16
KH.C2.338.v2.A.SL4-1	21	253	322	121	22	27	262	127	88	37	0.687463	8.65599	9.72019	3.66734	0.709684	0.874147	7.85678	4.28105	3.07375	1.12657	12.5912	1.12294	0.377291	0.193515	8.98794	0.544887	0.71799	0.366512	P52046	sp|P52046|CRT_CLOAB 3-hydroxybutyryl-CoA dehydratase OS=Clostridium acetobutylicum (strain ATCC 824 / DSM 792 / JCM 1419 / LMG 5710 / VKM B-1787) GN=crt PE=3 SV=1	1e-10
KH.C14.41.v1.A.SL1-1	30	357	379	157	12	38	544	191	159	17	0.992126	12.339	11.5578	4.80707	0.391056	1.24285	16.48	6.50423	5.61047	0.522902	12.4369	0.936685	0.415917	0.0813501	13.2598	0.394674	0.862588	0.0932012
KH.C9.293.v2.C.SL2-2	135	1601	1684	336	2	150	2457	721	96	1	6.49996	80.5627	74.7666	14.9779	0.0948896	7.14263	108.366	35.7461	4.93179	0.0447819	12.3943	0.928054	0.200329	0.0063353	15.1718	0.329863	0.137967	0.00908026	Q6PH37	sp|Q6PH37|ST1S1_DANRE Cytosolic sulfotransferase 1 OS=Danio rerio GN=sult1st1 PE=1 SV=1	1e-14
KH.S770.1.v1.A.nonSL3-1	24	281	318	155	87	20	337	139	97	107	0.672878	8.23375	8.22131	4.02339	2.40357	0.554556	8.65502	4.01288	2.9017	2.7902	12.2366	0.998489	0.489385	0.597399	15.6071	0.463648	0.723097	0.961572	P27674	sp|P27674|GTR1_BOVIN Solute carrier family 2, facilitated glucose transporter member 1 OS=Bos taurus GN=SLC2A1 PE=2 SV=1	9e-60
KH.L9.16.v1.A.SL2-1	22	255	319	116	126	30	327	182	91	147	0.437942	5.30518	5.85563	2.1379	2.47159	0.590617	5.96287	3.73063	1.93282	2.72168	12.1139	1.10376	0.365102	1.15608	10.096	0.625644	0.518095	1.40814	Q04827	sp|Q04827|CCND2_RAT G1/S-specific cyclin-D2 OS=Rattus norvegicus GN=Ccnd2 PE=2 SV=1	1e-37
KH.S762.1.v1.A.SL1-1	81	935	571	131	1	103	1433	273	70	4	1.95102	23.5372	12.6824	2.92135	0.023735	2.45361	31.6182	6.77107	1.799	0.0896114	12.064	0.538824	0.230346	0.00812467	12.8864	0.214151	0.26569	0.0498117	O57379	sp|O57379|S22A6_PSEAM Solute carrier family 22 member 6 OS=Pseudopleuronectes americanus GN=SLC22A6 PE=1 SV=1	0.025
KH.C13.60.v1.B.SL1-1	35	401	362	83	7	43	538	362	86	4	0.802911	9.61412	7.65767	1.76284	0.158237	0.975569	11.3056	8.55115	2.10501	0.0853464	11.9741	0.796502	0.230206	0.0897629	11.5887	0.756362	0.246167	0.0405444	Q5N3B4	sp|Q5N3B4|HEM1_SYNP6 Glutamyl-tRNA reductase OS=Synechococcus sp. (strain ATCC 27144 / PCC 6301 / SAUG 1402/1) GN=hemA PE=3 SV=1	9.9
KH.C7.746.v1.A.ND1-1	35	394	1271	1517	315	14	507	672	671	248	1.03847	12.2177	34.7746	41.6724	9.20979	0.410814	13.78	20.5312	21.2425	6.84392	11.7651	2.84624	1.19836	0.221005	33.5431	1.48993	1.03465	0.32218	Q40375	sp|Q40375|PRP2_MEDTR Repetitive proline-rich cell wall protein 2 OS=Medicago truncatula GN=PRP2 PE=2 SV=1	2e-05
KH.L119.34.v1.A.SL1-1	9	101	89	72	86	5	122	44	80	86	0.469234	5.50344	4.27883	3.47548	4.41832	0.257814	5.82666	2.3622	4.45034	4.17033	11.7286	0.777484	0.812248	1.27128	22.6002	0.405412	1.88398	0.937083	Q58DR6	sp|Q58DR6|EMP3_BOVIN Epithelial membrane protein 3 OS=Bos taurus GN=EMP3 PE=2 SV=1	0.52
KH.C3.115.v1.A.ND1-1	383	4236	6055	1669	3	420	3876	3147	875	9	21.9376	253.578	319.811	88.5078	0.169326	23.7919	203.37	185.611	53.4754	0.479467	11.5591	1.26119	0.276751	0.00191312	8.54786	0.912676	0.288105	0.00896611	Q95003	sp|Q95003|GPX3_CAEEL Glutathione peroxidase 3 OS=Caenorhabditis elegans GN=gpx-3 PE=3 SV=1	3e-24
KH.C7.383.v1.A.SL1-1	12	129	153	105	33	18	119	51	48	35	0.401244	4.50799	4.71745	3.25051	1.08731	0.595237	3.64491	1.75596	1.71248	1.08848	11.235	1.04646	0.68904	0.334504	6.12346	0.481756	0.975238	0.635618	Q8ILR9	sp|Q8ILR9|YPF17_PLAF7 Protein PF14_0175 OS=Plasmodium falciparum (isolate 3D7) GN=PF14_0175 PE=4 SV=1	1.5
KH.C8.842.v1.A.ND1-1	116	1225	645	393	238	118	1417	421	250	203	2.78223	30.7069	14.2654	8.72694	5.62501	2.79903	31.1327	10.3976	6.3978	4.52852	11.0368	0.464565	0.611757	0.644557	11.1227	0.333976	0.615315	0.707825	B3SRQ2	sp|B3SRQ2|MYD88_SALSA Myeloid differentiation primary response protein MyD88 OS=Salmo salar GN=myd88 PE=2 SV=1	2e-05
KH.C9.161.v1.A.SL1-1	92	963	794	372	277	82	1623	437	216	316	2.08726	22.8339	16.6111	7.81387	6.1927	1.83989	33.7303	10.2091	5.22876	6.66809	10.9397	0.727473	0.470402	0.792526	18.3327	0.302668	0.512167	1.27527	A4J683	sp|A4J683|RNC_DESRM Ribonuclease 3 OS=Desulfotomaculum reducens (strain MI-1) GN=rnc PE=3 SV=1	5.7
KH.L37.53.v1.A.SL2-1	10	104	238	121	0	6	118	134	137	1	0.428234	4.65458	9.39824	4.79735	0	0.25411	4.62888	5.90884	6.25976	0.0398297	10.8692	2.01914	0.510452	0	18.216	1.27652	1.05939	0.00636281	Q8JHF2	sp|Q8JHF2|LFNG_DANRE Beta-1,3-N-acetylglucosaminyltransferase lunatic fringe OS=Danio rerio GN=lfng PE=2 SV=2	1e-30
KH.S1697.1.v1.C.ND1-1	87	875	801	128	10	71	644	244	56	17	2.18499	22.967	18.5503	2.97629	0.247481	1.76351	14.8159	6.3101	1.50063	0.397104	10.5113	0.807694	0.160444	0.0831509	8.40137	0.4259	0.237814	0.264625	Q18LD4	sp|Q18LD4|UL17_ELHVK Virion-packaging protein UL17 homolog OS=Elephantid herpesvirus 1 (isolate Asian elephant/Berlin/Kiba/1998) PE=3 SV=1	0.34
KH.L171.10.v1.A.SL2-1	13	130	232	59	1	9	127	87	17	1	0.274717	2.87112	4.52083	1.15433	0.0208235	0.188094	2.45843	1.89312	0.383307	0.0196547	10.4512	1.57459	0.255335	0.0180395	13.0703	0.77005	0.202474	0.0512768	D2KQB0	sp|D2KQB0|HHEX_PATMI Hematopoietically-expressed homeobox protein HHEX homolog OS=Patiria miniata GN=hhex PE=2 SV=1	3e-28
KH.C8.137.v1.A.SL2-1	30	300	252	60	0	20	560	178	43	1	2.98728	31.2207	23.139	5.53148	0	1.96959	51.0806	18.2512	4.56856	0.0926149	10.4512	0.741143	0.239055	0	25.9347	0.357302	0.250316	0.0202722	P58612	sp|P58612|Y1037_NOSS1 UPF0182 protein alr1037 OS=Nostoc sp. (strain PCC 7120 / UTEX 2576) GN=alr1037 PE=3 SV=1	6.9
KH.S597.2.v1.A.SL2-1	56	558	254	165	182	47	639	187	133	186	1.56039	16.2497	6.52632	4.25662	4.99723	1.29519	16.3102	5.36543	3.95416	4.82042	10.4139	0.401626	0.652224	1.17399	12.5929	0.328961	0.73697	1.21908	Q4V8F3	sp|Q4V8F3|RHBL4_RAT Rhomboid-related protein 4 OS=Rattus norvegicus GN=Rhbdd1 PE=2 SV=1	2e-28
KH.C9.177.v1.A.nonSL2-1	11	109	228	146	0	11	126	114	65	2	0.587018	6.07927	11.2197	7.21351	0	0.580553	6.15946	6.26441	3.70108	0.0992692	10.3562	1.84557	0.642931	0	10.6096	1.01704	0.59081	0.0268217	Q8T1C6	sp|Q8T1C6|GNT1_DICDI [Skp1-protein]-hydroxyproline N-acetylglucosaminyltransferase OS=Dictyostelium discoideum GN=gnt1 PE=1 SV=2	5.7
KH.C2.568.v2.A.SL1-1	113	1114	932	247	3	111	986	206	144	8	3.5284	36.3538	26.8351	7.14054	0.0923065	3.42778	28.2026	6.62343	4.79753	0.232335	10.3032	0.738165	0.266089	0.0129271	8.22767	0.234852	0.724327	0.0484281	B6IZ80	sp|B6IZ80|GLYA_COXB2 Serine hydroxymethyltransferase OS=Coxiella burnetii (strain CbuG_Q212) GN=glyA PE=3 SV=1	0.25
KH.C1.1217.v1.A.ND1-1	29	284	313	107	16	27	335	190	62	23	0.617147	6.31648	6.1422	2.10819	0.335523	0.568257	6.53053	4.16352	1.40779	0.455244	10.235	0.972408	0.34323	0.159152	11.4922	0.637547	0.338125	0.323374	Q9BTT6	sp|Q9BTT6|LRRC1_HUMAN Leucine-rich repeat-containing protein 1 OS=Homo sapiens GN=LRRC1 PE=1 SV=1	6e-12
KH.C3.187.v1.A.SL1-1	11	105	288	192	7	28	168	216	109	5	0.218204	2.17684	5.26807	3.5262	0.13683	0.549311	3.05276	4.41205	2.30703	0.09225	9.97615	2.42006	0.669353	0.0388037	5.55743	1.44527	0.522892	0.0399865	B4MRW2	sp|B4MRW2|AKTP2_DROWI Protein crossbronx-like OS=Drosophila willistoni GN=GK15683 PE=3 SV=1	2.1
KH.S936.3.v1.A.ND1-1	63	597	730	427	284	98	1117	581	229	253	1.67312	16.5702	17.8772	10.4991	7.4322	2.57397	27.174	15.8884	6.48902	6.24933	9.90376	1.07888	0.587288	0.707892	10.5572	0.584691	0.408412	0.963063	Q66JV4	sp|Q66JV4|R12BB_MOUSE RNA-binding protein 12B-B OS=Mus musculus GN=Rbm12b2 PE=2 SV=2	0.37
KH.C1.125.v1.A.nonSL2-1	20	188	215	57	17	22	218	83	41	5	0.553877	5.44135	5.49048	1.46148	0.463921	0.602554	5.53035	2.36689	1.2115	0.128789	9.82413	1.00903	0.266185	0.317432	9.17818	0.427982	0.511853	0.106306	Q801M1	sp|Q801M1|CNR1_XENLA Cannabinoid receptor 1 OS=Xenopus laevis GN=cnr1 PE=2 SV=1	0.001
KH.C1.222.v1.A.SL2-1	46	431	256	53	1	50	698	137	14	0	1.08775	10.6516	5.58213	1.16033	0.0233014	1.16931	15.1196	3.33586	0.353228	0	9.79232	0.524065	0.207865	0.0200817	12.9303	0.220632	0.105888	0	Q8ZRM7	sp|Q8ZRM7|DKGB_SALTY 2,5-diketo-D-gluconic acid reductase B OS=Salmonella typhimurium (strain LT2 / SGSC1412 / ATCC 700720) GN=dkgB PE=3 SV=1	2e-08
KH.L140.3.v1.A.SL1-1	22	205	907	510	7	11	227	504	225	4	2.10286	20.479	79.9437	45.1329	0.659323	1.03985	19.8759	49.6061	22.947	0.35561	9.73862	3.9037	0.564559	0.0146085	19.1142	2.49579	0.462585	0.015497
KH.S2580.1.v1.C.ND1-1	15	139	157	101	13	18	152	87	60	13	0.555234	5.37732	5.35887	3.46132	0.474177	0.658943	5.15397	3.31605	2.3697	0.447563	9.68478	0.996569	0.645904	0.136993	7.82157	0.643397	0.714614	0.188869	P56434	sp|P56434|FUT6_PANTR Alpha-(1,3)-fucosyltransferase 6 OS=Pan troglodytes GN=FUT6 PE=3 SV=1	2e-08
KH.C12.687.v1.A.ND1-1	22	200	263	242	52	34	323	212	121	53	0.495406	4.70689	5.46113	5.04532	1.15386	0.757195	6.66276	4.91576	2.90723	1.11004	9.50109	1.16024	0.92386	0.228699	8.79926	0.737797	0.59141	0.381821	P49026	sp|P49026|GBLP_TOBAC Guanine nucleotide-binding protein subunit beta-like protein OS=Nicotiana tabacum GN=ARCA PE=2 SV=1	0.86
KH.C11.667.v1.A.nonSL5-1	126	1132	562	52	1	73	1044	258	24	2	6.03456	56.6615	24.8199	2.30576	0.047194	3.45771	45.8025	12.7237	1.22643	0.0890904	9.38949	0.438039	0.0928995	0.0204679	13.2465	0.277794	0.0963898	0.0726421	Q83FJ0	sp|Q83FJ0|DCUP_TROWT Uroporphyrinogen decarboxylase OS=Tropheryma whipplei (strain Twist) GN=hemE PE=3 SV=1	0.96
KH.L139.18.v1.A.SL1-1	43	382	581	319	3	57	459	534	152	5	0.847046	7.86444	10.5537	5.81787	0.0582333	1.11046	8.28256	10.8317	3.19476	0.0916082	9.28455	1.34195	0.551266	0.0100094	7.45866	1.30777	0.294946	0.0286745	P47820	sp|P47820|ACE_RAT Angiotensin-converting enzyme OS=Rattus norvegicus GN=Ace PE=2 SV=1	2e-70
KH.C8.303.v1.A.ND1-1	22	194	121	37	0	16	401	78	17	3	1.29955	11.9767	6.59091	2.02352	0	0.93472	21.6984	4.74441	1.07146	0.164823	9.21606	0.550309	0.307017	0	23.2138	0.218652	0.225836	0.15383
KH.S164.12.v1.A.SL2-1	36	314	582	66	3	26	334	340	26	2	0.542781	4.94786	8.09159	0.9213	0.0445713	0.387691	4.61298	5.27859	0.418265	0.0280464	9.11577	1.63537	0.113859	0.0483787	11.8986	1.14429	0.0792381	0.0670542	Q9W7R6	sp|Q9W7R6|SOX14_CHICK Transcription factor SOX-14 OS=Gallus gallus GN=SOX14 PE=2 SV=1	3e-32
KH.C2.409.v1.A.ND1-1	25	217	135	37	0	9	168	28	5	0	0.721451	6.54474	3.59244	0.988561	0	0.256862	4.44109	0.832035	0.153955	0	9.07164	0.548904	0.275178	0	17.2898	0.187349	0.185034	0	Q5RAE3	sp|Q5RAE3|LAT2_PONAB Large neutral amino acids transporter small subunit 2 OS=Pongo abelii GN=SLC7A8 PE=2 SV=2	8e-15
KH.C6.128.v1.A.SL2-1	34	287	314	246	288	49	367	268	164	277	0.59225	5.22485	5.04364	3.96731	4.94345	0.844136	5.85606	4.80704	3.04808	4.48778	8.82204	0.965318	0.786596	1.24605	6.93734	0.820866	0.634087	1.47233	Q7TSY6	sp|Q7TSY6|CELF4_MOUSE CUGBP Elav-like family member 4 OS=Mus musculus GN=Celf4 PE=1 SV=2	5e-59
KH.L96.7.v2.A.SL2-2	19	159	188	149	81	23	186	83	96	81	0.787589	6.88826	7.18609	5.71831	3.30859	0.942897	7.06272	3.54275	4.24594	3.12289	8.746	1.04324	0.795747	0.578596	7.49045	0.501613	1.19849	0.735501	Q9CUS9	sp|Q9CUS9|SPPL3_MOUSE Signal peptide peptidase-like 3 OS=Mus musculus GN=Sppl3 PE=2 SV=3	8e-31
KH.C4.234.v2.A.SL2-1	27	221	284	232	110	30	271	169	194	153	0.698625	5.97639	6.77622	5.55781	2.80469	0.767701	6.42337	4.50281	5.35597	3.68212	8.5545	1.13383	0.820193	0.50464	8.36702	0.701005	1.18947	0.687479	Q5ZIU9	sp|Q5ZIU9|S39A9_CHICK Zinc transporter ZIP9 OS=Gallus gallus GN=SLC39A9 PE=2 SV=1	5e-27
KH.C14.221.v2.A.SL1-1	14	114	105	27	0	13	192	83	23	3	0.214001	1.82121	1.48002	0.382109	0	0.196527	2.68845	1.30642	0.375122	0.0426516	8.51026	0.812657	0.258179	0	13.6798	0.485938	0.287137	0.113701	Q5R9H4	sp|Q5R9H4|A1CF_PONAB APOBEC1 complementation factor OS=Pongo abelii GN=A1CF PE=2 SV=1	1e-88
KH.C14.521.v1.A.SL1-1	49	393	486	189	0	71	405	361	86	6	1.08879	9.12657	9.95805	3.88818	0	1.56026	8.24361	8.25987	2.03894	0.124001	8.38229	1.0911	0.390456	0	5.28347	1.00197	0.246849	0.0608166	Q9JLK3	sp|Q9JLK3|CABP5_MOUSE Calcium-binding protein 5 OS=Mus musculus GN=Cabp5 PE=1 SV=1	1.1
KH.C1.344.v1.A.ND1-1	34	272	376	160	32	28	542	247	91	37	0.639187	5.34422	6.51817	2.78487	0.592804	0.520592	9.33387	4.78149	1.82535	0.646959	8.36096	1.21967	0.427247	0.212866	17.9293	0.512273	0.381754	0.35443	Q5QKR8	sp|Q5QKR8|PSEB_CAMJJ UDP-N-acetylglucosamine 4,6-dehydratase (inverting) OS=Campylobacter jejuni subsp. jejuni serotype O:23/36 (strain 81-176) GN=pseB PE=3 SV=1	0.12
KH.C3.261.v1.A.SL2-1	114	900	909	414	307	69	1020	327	359	324	3.77835	31.175	27.7812	12.7038	10.0265	2.26171	30.9679	11.16	12.6955	9.98777	8.25095	0.891136	0.457281	0.78925	13.6922	0.360372	1.13759	0.78672	Q5U3G6	sp|Q5U3G6|YIF1B_DANRE Protein YIF1B OS=Danio rerio GN=yif1b PE=2 SV=2	1e-50
KH.C5.400.v1.A.nonSL5-1	24	188	76	11	2	11	280	45	6	0	2.38458	19.5221	6.96312	1.01188	0.195814	1.0809	25.4843	4.60395	0.636076	0	8.18677	0.35668	0.14532	0.193515	23.577	0.180658	0.138159	0	Q9LS58	sp|Q9LS58|FB158_ARATH F-box protein At3g18320 OS=Arabidopsis thaliana GN=At3g18320 PE=2 SV=1	8.5
KH.C1.237.v2.A.SL5-1	21	164	154	82	87	24	228	81	84	118	1.12464	9.17922	7.60511	4.06579	4.59121	1.27115	11.1852	4.46681	4.79989	5.87765	8.16189	0.828513	0.534613	1.12923	8.79926	0.39935	1.07457	1.22454	Q8N8Q1	sp|Q8N8Q1|C56D1_HUMAN Cytochrome b561 domain-containing protein 1 OS=Homo sapiens GN=CYB561D1 PE=2 SV=1	3e-05
KH.C8.293.v1.A.SL3-1	19	147	357	271	21	23	250	298	317	23	0.588404	4.75779	10.1948	7.7701	0.640845	0.704434	7.09211	9.50288	10.4746	0.662485	8.08593	2.14276	0.762162	0.0824758	10.0678	1.33992	1.10226	0.0632467	Q17CE7	sp|Q17CE7|S35B3_AEDAE Adenosine 3'-phospho 5'-phosphosulfate transporter 2 OS=Aedes aegypti GN=Papst2 PE=3 SV=1	8e-53
KH.C2.116.v2.A.SL2-2	44	340	341	139	5	63	590	221	61	17	0.619681	5.0045	4.42852	1.81245	0.06939	0.877498	7.61168	3.20497	0.916646	0.222685	8.07593	0.884908	0.409267	0.0382853	8.6743	0.42106	0.286007	0.242934	Q9H1V8	sp|Q9H1V8|S6A17_HUMAN Sodium-dependent neutral amino acid transporter SLC6A17 OS=Homo sapiens GN=SLC6A17 PE=2 SV=3	1e-70
KH.C2.212.v1.A.SL1-1	112	854	771	132	84	72	681	261	91	96	2.27042	18.0931	14.4123	2.47741	1.67795	1.44348	12.6459	5.44811	1.96828	1.81003	7.96904	0.796561	0.171896	0.677302	8.76067	0.430821	0.361277	0.919601	B6YXT4	sp|B6YXT4|RADB_THEON DNA repair and recombination protein RadB OS=Thermococcus onnurineus (strain NA1) GN=radB PE=3 SV=1	3.7
KH.L124.20.v1.A.SL1-1	56	424	573	176	1	68	855	437	95	5	1.05278	8.3307	9.93328	3.06335	0.0185251	1.2643	14.7241	8.45956	1.90559	0.0874269	7.91305	1.19237	0.308393	0.00604734	11.6461	0.574538	0.225259	0.0458792	Q63424	sp|Q63424|S15A2_RAT Solute carrier family 15 member 2 OS=Rattus norvegicus GN=Slc15a2 PE=2 SV=1	2e-56
KH.L122.14.v1.A.SL1-1	79	582	598	283	91	95	1190	711	151	110	2.02332	15.5786	14.123	6.71058	2.29663	2.40632	27.9189	18.751	4.1264	2.62034	7.69949	0.906569	0.475151	0.342241	11.6024	0.671624	0.220063	0.635017	Q497B8	sp|Q497B8|KDM8_RAT Lysine-specific demethylase 8 OS=Rattus norvegicus GN=Kdm8 PE=2 SV=1	0.001
KH.C9.527.v1.A.SL1-1	27	198	178	173	86	23	176	120	146	94	1.03319	7.91856	6.28092	6.12909	3.24284	0.870428	6.16937	4.72838	5.96106	3.34556	7.66421	0.79319	0.975826	0.529089	7.08774	0.76643	1.2607	0.561235	Q9UGQ2	sp|Q9UGQ2|FLOWR_HUMAN Calcium channel flower homolog OS=Homo sapiens GN=CACFD1 PE=2 SV=1	8e-09
KH.C8.458.v2.A.ND1-1	32	234	394	180	61	29	332	287	181	74	0.672462	5.13925	7.63489	3.50207	1.26316	0.602707	6.391	6.21035	4.05838	1.44636	7.64244	1.4856	0.458694	0.36069	10.6038	0.971734	0.653486	0.356388	Q95245	sp|Q95245|CY561_PIG Cytochrome b561 OS=Sus scrofa GN=CYB561 PE=2 SV=1	3e-25
KH.C12.70.v1.A.SL2-1	24	173	262	170	127	26	151	148	129	174	0.796025	5.99692	8.01319	5.22035	4.15079	0.852863	4.58781	5.05469	4.56522	5.36773	7.53357	1.33622	0.651469	0.795118	5.37931	1.10176	0.903166	1.17579	Q8R537	sp|Q8R537|PEX7_CRIGR Peroxisomal targeting signal 2 receptor OS=Cricetulus griseus GN=PEX7 PE=1 SV=1	5e-16
KH.C8.215.v2.A.SL1-1	30	215	235	138	195	16	194	88	154	236	0.949835	7.11429	6.86094	4.04521	6.08378	0.500999	5.62654	2.86897	5.2024	6.94968	7.49003	0.964388	0.5896	1.50395	11.2306	0.5099	1.81333	1.33586	A2VE55	sp|A2VE55|S35D2_BOVIN UDP-N-acetylglucosamine/UDP-glucose/GDP-mannose transporter OS=Bos taurus GN=SLC35D2 PE=2 SV=1	2e-71
KH.L18.53.v1.A.ND1-1	32	222	358	218	178	27	240	174	182	173	0.767511	5.56485	7.91783	4.8409	4.20694	0.640455	5.27301	4.29735	4.6576	3.85928	7.25052	1.42283	0.611392	0.869041	8.23323	0.81497	1.08383	0.828599	Q791F6	sp|Q791F6|TPRA1_RAT Transmembrane protein adipocyte-associated 1 OS=Rattus norvegicus GN=Tpra1 PE=2 SV=1	1e-24
KH.C2.38.v4.A.ND3-1	18	124	139	112	127	27	173	104	97	109	0.384865	2.77092	2.74056	2.21712	2.67578	0.570939	3.3884	2.28974	2.21291	2.16764	7.19972	0.989044	0.809002	1.20688	5.93479	0.675758	0.966447	0.979545	Q7Z2H8	sp|Q7Z2H8|S36A1_HUMAN Proton-coupled amino acid transporter 1 OS=Homo sapiens GN=SLC36A1 PE=1 SV=1	2e-42
KH.C2.348.v4.A.ND1-1	35	241	119	35	34	18	180	48	30	31	1.21981	8.77821	3.82436	1.12934	1.16765	0.62042	5.74657	1.72259	1.11558	1.00487	7.1964	0.435665	0.295303	1.03392	9.26238	0.299759	0.647619	0.900762	A8KBE0	sp|A8KBE0|OXR1_XENTR Oxidation resistance protein 1 OS=Xenopus tropicalis GN=oxr1 PE=2 SV=2	7e-21
KH.C3.137.v1.A.nonSL6-1	105	718	645	225	45	84	1178	425	181	62	3.59037	25.6591	20.3376	7.12309	1.51626	2.84067	36.8985	14.9643	6.60367	1.97182	7.14663	0.792607	0.350243	0.212866	12.9894	0.405553	0.441295	0.298595	Q9Y2D1	sp|Q9Y2D1|ATF5_HUMAN Cyclic AMP-dependent transcription factor ATF-5 OS=Homo sapiens GN=ATF5 PE=1 SV=4	9e-08
KH.C4.661.v1.A.SL1-1	355	2418	3496	1156	57	199	2750	1409	633	68	17.0201	121.159	154.559	51.313	2.69291	9.43578	120.776	69.5604	32.3813	3.03228	7.11859	1.27567	0.331996	0.05248	12.7998	0.575946	0.465513	0.0936429	A6NL05	sp|A6NL05|F74A7_HUMAN Protein FAM74A7 OS=Homo sapiens GN=FAM74A7 PE=3 SV=3	0.95
KH.C11.530.v1.A.nonSL6-1	39	265	273	166	185	31	236	140	112	192	0.811657	5.76395	5.23913	3.19854	3.79395	0.638058	4.49918	3.00022	2.48704	3.71651	7.10146	0.908949	0.610509	1.18615	7.05136	0.666837	0.828952	1.49435	Q9N1Q4	sp|Q9N1Q4|LAT2_RABIT Large neutral amino acids transporter small subunit 2 OS=Oryctolagus cuniculus GN=SLC7A8 PE=1 SV=1	7e-82
KH.C2.507.v1.A.SL2-1	18	122	111	82	96	22	144	66	78	99	0.296771	2.10221	1.68757	1.2517	1.55967	0.358726	2.17483	1.1205	1.37215	1.51814	7.08359	0.80276	0.741715	1.24605	6.06265	0.515211	1.22459	1.10639	P00767	sp|P00767|CTRB_BOVIN Chymotrypsinogen B OS=Bos taurus PE=1 SV=1	8e-15
KH.C7.766.v1.A.SL1-1	29	196	394	366	288	25	226	211	346	284	1.0107	7.13913	12.6622	11.8097	9.89071	0.861695	7.21514	7.5722	12.8664	9.20592	7.06357	1.77363	0.932677	0.837506	8.37319	1.04949	1.69916	0.715504	F4JP36	sp|F4JP36|HAP2_ARATH Protein HAPLESS 2 OS=Arabidopsis thaliana GN=HAP2 PE=2 SV=1	4.1
KH.C3.515.v1.A.SL1-1	170	1147	862	515	357	124	1672	636	399	362	5.54515	39.1015	25.9275	15.5527	11.4748	4.00015	49.959	21.3618	13.8865	10.9824	7.05149	0.663081	0.599855	0.737798	12.4893	0.427587	0.650063	0.79087	A4IT64	sp|A4IT64|RBSD_GEOTN D-ribose pyranase OS=Geobacillus thermodenitrificans (strain NG80-2) GN=rbsD PE=3 SV=1	0.47
KH.C11.333.v1.B.SL1-1	23	155	226	204	22	43	349	257	147	44	0.540489	3.80677	4.8973	4.43838	0.509441	0.999351	7.51273	6.21884	3.68581	0.961696	7.0432	1.28647	0.906292	0.114781	7.51761	0.827773	0.592685	0.260919	Q9V7A4	sp|Q9V7A4|ITA4_DROME Integrin alpha-PS4 OS=Drosophila melanogaster GN=ItgalphaPS4 PE=1 SV=2	0.7
KH.C2.499.v1.A.nonSL4-1	31	208	240	143	54	30	269	147	177	98	1.94263	13.6225	13.8685	8.29658	3.33452	1.85926	15.4416	9.48554	11.8347	5.71189	7.01242	1.01805	0.598234	0.401915	8.30527	0.614283	1.24766	0.482639	P61917	sp|P61917|NPC2_PANTR Epididymal secretory protein E1 OS=Pan troglodytes GN=NPC2 PE=2 SV=1	4e-20
KH.L20.50.v2.A.SL3-1	54	361	176	22	2	60	227	51	11	2	5.75667	40.2208	17.3013	2.17138	0.210097	6.32585	22.1675	5.59841	1.2512	0.198305	6.98682	0.430158	0.125504	0.0967574	3.50427	0.25255	0.223492	0.158492	Q6MGM6	sp|Q6MGM6|ATPG_BDEBA ATP synthase gamma chain OS=Bdellovibrio bacteriovorus (strain ATCC 15356 / DSM 50701 / NCIB 9529 / HD100) GN=atpG PE=3 SV=1	0.27
KH.C9.307.v1.A.SL1-1	68	454	565	535	954	43	301	303	410	894	1.6753	11.6898	12.8358	12.2032	23.1603	1.04772	6.79304	7.68677	10.7777	20.4856	6.97771	1.09803	0.950718	1.89789	6.48367	1.13157	1.40211	1.90074	Q8NBP5	sp|Q8NBP5|MFSD9_HUMAN Major facilitator superfamily domain-containing protein 9 OS=Homo sapiens GN=MFSD9 PE=2 SV=2	2e-13
KH.C1.330.v4.A.SL1-1	106	703	407	285	377	114	1088	291	182	376	1.84006	12.754	6.51492	4.58043	6.4488	1.95714	17.3009	5.20158	3.37096	6.07071	6.93131	0.510813	0.703067	1.4079	8.83989	0.300655	0.648064	1.80089	Q1J219	sp|Q1J219|RNY_DEIGD Ribonuclease Y OS=Deinococcus geothermalis (strain DSM 11300) GN=rny PE=3 SV=1	0.057
KH.C14.96.v1.R.ND1-1	152	990	696	419	243	120	1000	354	317	259	5.19357	35.3528	21.9291	13.2548	8.18165	4.05503	31.2994	12.455	11.5568	8.23092	6.80703	0.620293	0.604437	0.617261	7.71865	0.39793	0.927888	0.712213	Q9JI92	sp|Q9JI92|SDCB1_RAT Syntenin-1 OS=Rattus norvegicus GN=Sdcbp PE=1 SV=1	8e-54
KH.C13.163.v2.R.ND1-1	16	103	81	42	37	22	139	49	13	42	0.624387	4.20085	2.91479	1.51746	1.42281	0.849077	4.96892	1.96901	0.541295	1.52444	6.72796	0.693858	0.520608	0.937625	5.85214	0.396264	0.274908	2.81628	Q92643	sp|Q92643|GPI8_HUMAN GPI-anchor transamidase OS=Homo sapiens GN=PIGK PE=1 SV=2	4e-64
KH.C14.20.v2.B.SL2-1	21	135	139	40	16	29	119	60	27	22	0.539676	3.62588	3.29395	0.95172	0.405178	0.737059	2.80139	1.58775	0.740345	0.525851	6.71863	0.908455	0.288929	0.425732	3.80077	0.566771	0.466286	0.710278	Q7ZU13	sp|Q7ZU13|SPNS1_DANRE Protein spinster homolog 1 OS=Danio rerio GN=spns1 PE=2 SV=1	0.046
KH.C7.741.v1.A.SL1-1	97	615	766	413	154	77	588	275	174	131	4.02085	26.6433	29.2795	15.8501	6.29041	3.15666	22.3273	11.738	7.69576	5.0506	6.62628	1.09895	0.541337	0.396869	7.07309	0.525725	0.655626	0.656284	Q27409	sp|Q27409|FP1_MYTGA Adhesive plaque matrix protein OS=Mytilus galloprovincialis GN=FP1 PE=2 SV=1	1.9
KH.C5.543.v1.R.ND1-1	18	114	179	211	0	11	210	285	149	2	0.397625	2.63191	3.64622	4.31537	0	0.240317	4.24945	6.4828	3.51191	0.0410919	6.61909	1.38539	1.18352	0	17.6827	1.52556	0.541728	0.0117007	P56825	sp|P56825|HCYE_SEPOF Hemocyanin, units E and F (Fragments) OS=Sepia officinalis PE=1 SV=1	0.0002
KH.L61.12.v1.A.SL1-1	90	568	626	520	520	75	581	325	482	541	3.10323	20.4685	19.9037	16.6001	17.668	2.55754	18.351	11.5391	17.7327	17.3498	6.59587	0.972408	0.834018	1.06433	7.17526	0.628798	1.53675	0.978408	Q9DA39	sp|Q9DA39|LFG4_MOUSE Protein lifeguard 4 OS=Mus musculus GN=Tmbim4 PE=2 SV=1	6e-36
KH.C12.92.v2.A.SL5-1	64	400	395	155	39	57	420	229	209	43	2.13839	13.968	12.1701	4.79483	1.28405	1.88353	12.8549	7.87878	7.45091	1.33629	6.532	0.871284	0.393986	0.267799	6.82491	0.6129	0.945693	0.179346	O68965	sp|O68965|MI2D_RHIME Inositol 2-dehydrogenase OS=Rhizobium meliloti (strain 1021) GN=idhA PE=1 SV=2	2e-17
KH.C6.66.v1.A.SL1-1	91	566	654	542	426	47	632	280	497	482	3.90061	25.3556	25.8498	21.5093	17.9934	1.99241	24.8154	12.3585	22.7302	19.2161	6.50042	1.01949	0.832085	0.836541	12.4549	0.498018	1.83924	0.845396	Q62745	sp|Q62745|CD81_RAT CD81 antigen OS=Rattus norvegicus GN=Cd81 PE=1 SV=1	3e-15
KH.C5.114.v1.A.ND1-1	104	645	735	257	131	69	607	301	187	131	2.19671	14.2385	14.3158	5.02582	2.72661	1.44138	11.7447	6.5467	4.21441	2.57357	6.48175	1.00543	0.351069	0.542519	8.14821	0.557419	0.643746	0.61066	Q25147	sp|Q25147|SC61A_HALRO Protein transport protein Sec61 subunit alpha OS=Halocynthia roretzi PE=2 SV=1	0
KH.C5.114.v2.A.nonSL15-1	86	529	677	204	106	70	509	274	132	108	1.87688	12.0659	13.6244	4.12197	2.27959	1.51087	10.1758	6.15753	3.07375	2.19224	6.4287	1.12916	0.302544	0.553035	6.73508	0.605113	0.499187	0.713213	Q25147	sp|Q25147|SC61A_HALRO Protein transport protein Sec61 subunit alpha OS=Halocynthia roretzi PE=2 SV=1	0
KH.C9.176.v6.A.SL1-1	18	110	235	191	154	24	123	167	104	146	0.0979731	0.625739	1.17948	0.962505	0.825975	0.129192	0.613271	0.935982	0.603982	0.739117	6.38684	1.88494	0.816041	0.858152	4.74697	1.52621	0.645292	1.22374	Q01705	sp|Q01705|NOTC1_MOUSE Neurogenic locus notch homolog protein 1 OS=Mus musculus GN=Notch1 PE=1 SV=3	0
KH.L53.14.v1.A.SL1-1	40	242	306	204	148	32	354	167	99	248	1.00571	6.35906	7.0945	4.74872	3.66678	0.795705	8.1532	4.32359	2.65585	5.79948	6.32298	1.11565	0.669353	0.772162	10.2465	0.530294	0.614268	2.18367	Q8JZX9	sp|Q8JZX9|BORG1_MOUSE Cdc42 effector protein 2 OS=Mus musculus GN=Cdc42ep2 PE=2 SV=1	5e-08
KH.C10.219.v1.C.ND1-1	21	127	101	19	3	23	132	47	21	4	0.544307	3.44029	2.41399	0.455946	0.0766228	0.589581	3.13409	1.25441	0.580765	0.0964297	6.32049	0.701682	0.188877	0.168052	5.3158	0.400247	0.462979	0.166039	Q8NDA2	sp|Q8NDA2|HMCN2_HUMAN Hemicentin-2 OS=Homo sapiens GN=HMCN2 PE=2 SV=2	0.0002
KH.L141.35.v1.A.ND1-1	40	238	231	99	79	30	254	136	83	91	1.77327	11.027	9.44313	4.06336	3.45108	1.31531	10.3148	6.20828	3.926	3.75217	6.21846	0.856362	0.430298	0.849315	7.84215	0.601879	0.632381	0.955725	Q8BLJ3	sp|Q8BLJ3|PLCX3_MOUSE PI-PLC X domain-containing protein 3 OS=Mus musculus GN=Plcxd3 PE=2 SV=1	4e-20
KH.C11.490.v1.A.SL1-1	25	148	136	125	87	23	195	69	110	89	0.869952	5.38249	4.36398	4.02718	2.98323	0.791541	6.21589	2.47241	4.08417	2.88052	6.18711	0.810774	0.922821	0.740774	7.85289	0.397757	1.6519	0.705289	Q827L7	sp|Q827L7|HIS1_STRAW ATP phosphoribosyltransferase OS=Streptomyces avermitilis (strain ATCC 31267 / DSM 46492 / JCM 5070 / NCIMB 12804 / NRRL 8165 / MA-4680) GN=hisG PE=3 SV=1	0.2
KH.C2.167.v1.A.SL3-1	28	165	148	98	67	37	139	78	70	68	0.991868	6.10866	4.83444	3.21408	2.33874	1.29625	4.51049	2.84516	2.64576	2.24043	6.15874	0.791408	0.66483	0.727655	3.47965	0.630788	0.929914	0.846799	Q5ZJX1	sp|Q5ZJX1|AB17C_CHICK Alpha/beta hydrolase domain-containing protein 17C OS=Gallus gallus GN=ABHD17C PE=2 SV=1	2e-66
KH.C7.149.v1.A.SL3-1	47	274	341	244	157	37	294	150	249	181	3.54906	21.6238	23.7442	17.0585	11.6823	2.76317	20.3365	11.6633	20.0618	12.7122	6.09283	1.09806	0.718426	0.684836	7.35984	0.573519	1.72008	0.633649	Q7Z0Q2	sp|Q7Z0Q2|RNKB_CERCA Ribonuclease kappa-B OS=Ceratitis capitata PE=3 SV=1	3e-05
KH.C4.193.v1.A.nonSL2-1	22	125	129	75	71	9	138	65	103	107	2.01773	11.9816	10.9098	6.36848	6.41667	0.816342	11.594	6.1386	10.0794	9.12744	5.93818	0.910547	0.583738	1.00757	14.2023	0.529466	1.64196	0.905558	A7S6M8	sp|A7S6M8|LTOR4_NEMVE Ragulator complex protein LAMTOR4 homolog OS=Nematostella vectensis GN=v1g232793 PE=3 SV=1	0.024
KH.L37.17.v1.A.SL1-1	28	159	215	169	103	17	143	126	142	100	0.922617	5.47554	6.53267	5.15567	3.34436	0.553991	4.31631	4.27515	4.99239	3.06471	5.93479	1.19306	0.789214	0.648675	7.7913	0.990463	1.16777	0.613877	Q02074	sp|Q02074|PYG_GALSU Phycobilisome rod-core linker polypeptide cpcG OS=Galdieria sulphuraria GN=cpcG PE=3 SV=3	0.83
KH.C4.760.v1.A.nonSL2-1	27	153	227	753	578	29	154	94	260	597	0.659101	3.90343	5.10979	17.0184	13.9036	0.700127	3.44368	2.36283	6.77202	13.5547	5.92235	1.30905	3.33055	0.816977	4.91864	0.686137	2.86606	2.00157	Q28199	sp|Q28199|CD5R1_BOVIN Cyclin-dependent kinase 5 activator 1 OS=Bos taurus GN=CDK5R1 PE=1 SV=1	2e-38
KH.C8.180.v1.A.ND2-1	54	305	344	199	180	43	325	166	208	172	1.39965	8.26211	8.2219	4.77544	4.59737	1.10226	7.71652	4.43047	5.75234	4.14648	5.90299	0.995133	0.580819	0.962712	7.00064	0.574154	1.29836	0.720833	Q9H0R3	sp|Q9H0R3|TM222_HUMAN Transmembrane protein 222 OS=Homo sapiens GN=TMEM222 PE=1 SV=2	9e-47
KH.C3.671.v1.C.SL1-1	59	331	403	352	368	44	344	261	326	397	1.67174	9.80194	10.5296	9.23412	10.2749	1.23299	8.92873	7.61509	9.8558	10.4625	5.8633	1.07424	0.876969	1.11271	7.2415	0.852876	1.29425	1.06156	Q29RM1	sp|Q29RM1|TPC_BOVIN Mitochondrial thiamine pyrophosphate carrier OS=Bos taurus GN=SLC25A19 PE=2 SV=1	7e-35
KH.C2.320.v1.A.SL1-1	54	300	458	413	96	80	334	458	199	106	1.16338	6.75483	9.09874	8.23782	2.03803	1.70454	6.59154	10.1604	4.57442	2.12402	5.80622	1.347	0.90538	0.247399	3.86705	1.54143	0.450222	0.464325	Q5ZJU3	sp|Q5ZJU3|ASNS_CHICK Asparagine synthetase [glutamine-hydrolyzing] OS=Gallus gallus GN=ASNS PE=2 SV=3	3e-95
KH.C2.1080.v1.A.SL1-1	49	272	440	371	769	42	279	210	264	748	1.8703	10.8505	15.4866	13.1107	28.9237	1.58546	9.75513	8.25376	10.7517	26.5548	5.80148	1.42727	0.846579	2.20612	6.15287	0.846094	1.30264	2.46983	Q1RMQ3	sp|Q1RMQ3|SYS1_BOVIN Protein SYS1 homolog OS=Bos taurus GN=SYS1 PE=2 SV=1	3e-23
KH.C2.322.v2.A.SL2-1	722	3984	4698	3862	758	574	3221	2053	1841	962	35.5176	204.829	213.112	175.895	36.7441	27.926	145.148	103.995	96.6311	44.0157	5.76698	1.04044	0.825364	0.208898	5.19758	0.716476	0.92919	0.455503	P23380	sp|P23380|VATL_DROME V-type proton ATPase 16 kDa proteolipid subunit OS=Drosophila melanogaster GN=Vha16-1 PE=2 SV=1	3e-21
KH.C3.413.v2.A.ND1-1	41	225	370	372	126	61	247	204	270	156	2.15999	12.3884	17.9746	18.1445	6.54109	3.17825	11.92	11.0666	15.1771	7.64396	5.73541	1.45091	1.00946	0.360499	3.75051	0.928404	1.37143	0.503652	P12815	sp|P12815|PDCD6_MOUSE Programmed cell death protein 6 OS=Mus musculus GN=Pdcd6 PE=1 SV=2	4e-47
KH.C2.499.v1.A.nonSL11-1	34	186	226	121	45	28	251	134	173	88	2.13358	12.1986	13.0775	7.02991	2.78262	1.73771	14.4283	8.65866	11.5833	5.13615	5.71742	1.07206	0.537556	0.395826	8.30307	0.600115	1.33777	0.443411	P61917	sp|P61917|NPC2_PANTR Epididymal secretory protein E1 OS=Pan troglodytes GN=NPC2 PE=2 SV=1	2e-21
KH.L22.1.v3.A.SL1-2	25	135	127	90	41	21	145	89	69	62	0.867952	4.89842	4.06582	2.8929	1.40266	0.72105	4.61144	3.18173	2.556	2.00204	5.64365	0.830028	0.711517	0.484862	6.39546	0.689963	0.803338	0.783271	Q6PCJ9	sp|Q6PCJ9|PPT2A_XENLA Lysosomal thioesterase PPT2-A OS=Xenopus laevis GN=ppt2-a PE=2 SV=1	2e-44
KH.C8.66.v1.A.SL1-1	20	108	128	131	88	24	185	91	116	87	0.672212	3.79373	3.96712	4.07646	2.91455	0.797771	5.69589	3.14945	4.15998	2.7197	5.64365	1.0457	1.02756	0.714971	7.13975	0.552934	1.32086	0.653779	Q3T0Q2	sp|Q3T0Q2|TMM59_BOVIN Transmembrane protein 59 OS=Bos taurus GN=TMEM59 PE=2 SV=2	9e-07
KH.C1.484.v1.A.SL2-1	26	140	149	107	99	12	128	67	71	111	0.907538	5.10723	4.79586	3.45789	3.40517	0.414251	4.09275	2.40815	2.64427	3.60363	5.62757	0.939033	0.721014	0.984755	9.87988	0.588394	1.09805	1.36281	Q9WC54	sp|Q9WC54|POL_HV1S2 Gag-Pol polyprotein OS=Human immunodeficiency virus type 1 group M subtype J (isolate SE9280) GN=gag-pol PE=3 SV=3	0.19
KH.C1.1044.v1.A.SL1-1	107	576	533	749	893	108	684	619	759	929	2.22073	12.494	10.2007	14.3923	18.2632	2.2168	13.0041	13.2288	16.8078	17.9331	5.62607	0.816446	1.41092	1.26896	5.86618	1.01727	1.27055	1.06695	Q28I80	sp|Q28I80|YLAT2_XENTR Y+L amino acid transporter 2 OS=Xenopus tropicalis GN=slc7a6 PE=2 SV=1	3e-78
KH.C7.96.v1.A.SL2-1	76	409	509	244	125	63	417	190	224	214	3.04182	17.1084	18.7857	9.04159	4.92994	2.49374	15.2886	7.83052	9.56586	7.96635	5.6244	1.09804	0.481303	0.545252	6.13082	0.512178	1.22161	0.83279	O12947	sp|O12947|ICMT_XENLA Protein-S-isoprenylcysteine O-methyltransferase OS=Xenopus laevis GN=icmt PE=2 SV=1	9e-34
KH.C12.43.v1.A.SL1-1	308	1635	1423	1015	1154	269	1460	852	753	1161	5.75922	31.9519	24.5362	17.5717	21.2633	4.97457	25.008	16.4047	15.0233	20.1916	5.54796	0.767909	0.716156	1.21009	5.02717	0.65598	0.915788	1.34402	Q62674	sp|Q62674|S28A1_RAT Sodium/nucleoside cotransporter 1 OS=Rattus norvegicus GN=Slc28a1 PE=1 SV=1	2e-82
KH.C3.37.v1.B.ND1-1	38	201	107	33	1	10	146	24	10	2	0.691156	3.8208	1.79459	0.555702	0.0179227	0.17988	2.43253	0.449491	0.194066	0.0338336	5.52813	0.469689	0.309654	0.0322525	13.5231	0.184783	0.431746	0.174341
KH.C1.1239.v1.A.SL1-1	127	671	768	737	298	162	555	337	529	290	3.1755	17.5346	17.7075	17.0612	7.34237	4.00602	12.712	8.67671	14.113	6.74423	5.52185	1.00986	0.963502	0.430354	3.17322	0.68256	1.62654	0.477872	P23785	sp|P23785|GRN_RAT Granulins OS=Rattus norvegicus GN=Grn PE=1 SV=3	3e-41
KH.C9.573.v1.A.SL2-1	20	105	99	215	192	13	123	138	182	208	0.682336	3.7439	3.11453	6.79113	6.45478	0.438634	3.84403	4.84802	6.62515	6.60021	5.48688	0.831895	2.18047	0.950472	8.76364	1.26118	1.36657	0.996234	Q9H920	sp|Q9H920|RN121_HUMAN RING finger protein 121 OS=Homo sapiens GN=RNF121 PE=1 SV=1	4e-86
KH.C10.408.v3.A.SL3-3	21	110	83	45	22	16	119	40	66	29	1.29979	7.11564	4.7372	2.57871	1.34181	0.979413	6.74707	2.54937	4.35869	1.66947	5.47444	0.665745	0.544353	0.52034	6.8889	0.377848	1.70971	0.383022	Q1JQA3	sp|Q1JQA3|AP3S2_BOVIN AP-3 complex subunit sigma-2 OS=Bos taurus GN=AP3S2 PE=2 SV=1	9e-58
KH.C11.235.v1.A.ND1-1	95	497	663	548	460	99	591	358	371	475	2.60701	14.2542	16.7773	13.9231	12.4391	2.68686	14.8566	10.1162	10.863	12.1238	5.46763	1.17701	0.829876	0.893417	5.52936	0.680925	1.07382	1.11606	Q9EQC4	sp|Q9EQC4|ELOV4_MOUSE Elongation of very long chain fatty acids protein 4 OS=Mus musculus GN=Elovl4 PE=1 SV=2	6e-55
KH.C9.736.v1.C.SL1-1	45	233	202	183	203	54	220	114	152	231	2.05941	11.1443	8.52455	7.75385	9.15459	2.44408	9.22289	5.37221	7.42217	9.83262	5.4114	0.764924	0.909591	1.18065	3.77356	0.582486	1.38159	1.32476	Q96HV5	sp|Q96HV5|TM41A_HUMAN Transmembrane protein 41A OS=Homo sapiens GN=TMEM41A PE=2 SV=1	4e-35
KH.C1.942.v2.A.SL2-1	61	315	289	194	83	45	454	185	150	104	7.06837	38.1475	30.8799	20.8126	9.47719	5.15695	48.1902	22.0739	18.5454	11.2085	5.39693	0.809487	0.673985	0.455358	9.34472	0.458057	0.840154	0.604382	P31647	sp|P31647|S6A11_RAT Sodium- and chloride-dependent GABA transporter 3 OS=Rattus norvegicus GN=Slc6a11 PE=2 SV=1	2e-05
KH.C6.113.v1.A.SL1-1	52	267	306	281	210	38	231	218	214	266	1.27075	6.81921	6.89552	6.35767	5.05694	0.918397	5.17109	5.48567	5.5799	6.04594	5.36629	1.01119	0.922001	0.795408	5.63055	1.06084	1.01718	1.08352	O95562	sp|O95562|SFT2B_HUMAN Vesicle transport protein SFT2B OS=Homo sapiens GN=SFT2D2 PE=1 SV=1	6e-23
KH.C9.59.v1.A.SL1-1	48	246	224	80	8	48	243	93	23	9	0.73273	3.92468	3.15311	1.13065	0.120338	0.72466	3.39799	1.46185	0.374616	0.127782	5.35624	0.803407	0.358582	0.106433	4.68908	0.43021	0.256262	0.341102	Q62273	sp|Q62273|S26A2_MOUSE Sulfate transporter OS=Mus musculus GN=Slc26a2 PE=2 SV=1	3e-45
KH.C14.339.v1.B.ND1-1	34	174	165	120	86	34	190	112	125	93	0.800645	4.2823	3.58289	2.61624	1.99559	0.791828	4.09853	2.71579	3.14071	2.0369	5.34856	0.836676	0.730203	0.762771	5.17604	0.662625	1.15646	0.648549	Q6DRC5	sp|Q6DRC5|USPL1_DANRE SUMO-specific isopeptidase USPL1 OS=Danio rerio GN=uspl1 PE=1 SV=1	0.91
KH.C8.266.v1.A.SL2-1	20	102	158	153	112	24	164	135	79	116	0.247175	1.31747	1.80061	1.75065	1.36397	0.293343	1.85665	1.71801	1.04174	1.33339	5.33011	1.36672	0.972256	0.779118	6.3293	0.925323	0.606363	1.27997	Q9JHG7	sp|Q9JHG7|PK3CG_MOUSE Phosphatidylinositol 4,5-bisphosphate 3-kinase catalytic subunit gamma isoform OS=Mus musculus GN=Pik3cg PE=1 SV=2	6e-86
KH.C7.691.v1.A.SL1-1	190	967	579	418	383	101	1260	483	435	623	11.3268	60.2484	31.8288	23.0709	22.499	5.95476	68.8076	29.6495	27.6693	34.5435	5.31911	0.528293	0.724843	0.975212	11.5551	0.430904	0.933215	1.24844	Q3B8G7	sp|Q3B8G7|IR3IP_XENLA Immediate early response 3-interacting protein 1 OS=Xenopus laevis GN=ier3ip1 PE=3 SV=1	9e-22
KH.L36.6.v2.A.SL4-1	34	171	231	217	216	36	156	168	144	259	0.761088	4.00054	4.76822	4.49729	4.76455	0.796982	3.19885	3.87242	3.43934	5.39239	5.25634	1.1919	0.943179	1.05943	4.0137	1.21057	0.888163	1.56786	P20303	sp|P20303|GTR1_PIG Solute carrier family 2, facilitated glucose transporter member 1 (Fragment) OS=Sus scrofa GN=SLC2A1 PE=2 SV=1	4e-06
KH.C10.328.v1.A.nonSL3-1	287	1440	1279	491	273	200	1302	417	285	292	14.5286	76.1854	59.7039	23.0123	13.6181	10.013	60.3764	21.7368	15.3938	13.7484	5.24381	0.783665	0.38544	0.591777	6.02981	0.360022	0.708188	0.893115	Q9BGI2	sp|Q9BGI2|PRDX4_BOVIN Peroxiredoxin-4 OS=Bos taurus GN=PRDX4 PE=2 SV=1	8e-47
KH.L87.21.v2.A.ND1-1	69	345	122	4	0	64	449	75	4	0	3.15458	16.4846	5.14329	0.169312	0	2.89376	18.8041	3.53078	0.195123	0	5.2256	0.312006	0.032919	0	6.49814	0.187767	0.0552635	0	Q8HZJ0	sp|Q8HZJ0|ASMT_MACMU Acetylserotonin O-methyltransferase OS=Macaca mulatta GN=ASMT PE=2 SV=1	2.8
KH.C11.483.v1.A.SL1-2	544	2719	2057	940	583	557	3759	821	661	697	16.0046	83.6028	55.8044	25.604	16.9015	16.2066	101.305	24.8717	20.7493	19.0724	5.22368	0.667495	0.458817	0.660112	6.25086	0.245513	0.834253	0.919181	Q66IG4	sp|Q66IG4|NDRG1_XENTR Protein NDRG1 OS=Xenopus tropicalis GN=ndrg1 PE=2 SV=1	3e-36
KH.L132.11.v1.A.SL2-1	75	374	415	202	3	146	660	813	171	6	3.20267	16.6912	16.3413	7.98615	0.126236	6.16587	25.8171	35.7485	7.79118	0.238302	5.21166	0.979037	0.488708	0.0158069	4.1871	1.38468	0.217944	0.0305861	A7M9B2	sp|A7M9B2|YCF1_CUSRE Putative membrane protein ycf1 OS=Cuscuta reflexa GN=ycf1 PE=3 SV=1	0.053
KH.S425.1.v1.A.SL1-1	47	233	340	362	301	45	264	256	241	312	1.23589	6.40329	8.2442	8.81302	7.79937	1.17026	6.35914	6.93167	6.76168	7.63065	5.18113	1.2875	1.069	0.884983	5.43393	1.09003	0.975476	1.12851	Q86VE9	sp|Q86VE9|SERC5_HUMAN Serine incorporator 5 OS=Homo sapiens GN=SERINC5 PE=2 SV=1	1e-23
KH.C11.331.v1.A.SL3-1	38	188	140	61	3	36	238	66	45	3	0.981009	5.0724	3.33278	1.45799	0.0763172	0.919141	5.62833	1.75449	1.23953	0.0720338	5.17059	0.657041	0.43747	0.0523442	6.12346	0.311724	0.706493	0.0581137	Q8NDA2	sp|Q8NDA2|HMCN2_HUMAN Hemicentin-2 OS=Homo sapiens GN=HMCN2 PE=2 SV=2	2e-20
KH.C2.64.v2.A.ND3-2	106	519	502	233	130	131	589	266	131	89	1.75212	8.96584	7.65156	3.56573	2.11745	2.1415	8.91838	4.52747	2.31039	1.36827	5.11714	0.853412	0.466014	0.593833	4.16454	0.507657	0.510304	0.592227	P31643	sp|P31643|SC6A6_RAT Sodium- and chloride-dependent taurine transporter OS=Rattus norvegicus GN=Slc6a6 PE=2 SV=1	7e-85
KH.C2.690.v1.A.SL2-1	65	318	338	273	315	63	339	193	288	430	2.51706	12.8699	12.0694	9.78765	12.02	2.41275	12.0252	7.69581	11.8995	15.4873	5.11305	0.937804	0.810947	1.22807	4.98404	0.639972	1.54623	1.3015	A1A5V7	sp|A1A5V7|TM41B_DANRE Transmembrane protein 41B OS=Danio rerio GN=tmem41b PE=2 SV=1	4e-53
KH.C9.549.v1.A.ND1-1	100	488	968	663	99	88	673	719	319	123	1.0668	5.44089	9.52244	6.54836	1.04071	0.928447	6.57676	7.89823	3.63104	1.22044	5.10019	1.75016	0.687677	0.158927	7.08362	1.20093	0.459728	0.336112	A0MSJ1	sp|A0MSJ1|CRA1B_DANRE Collagen alpha-1(XXVII) chain B OS=Danio rerio GN=col27a1b PE=2 SV=1	1e-32
KH.C2.269.v2.A.ND1-1	33	161	230	245	429	44	186	153	187	402	0.816121	4.16134	5.24514	5.60973	10.4547	1.07618	4.21373	3.89627	4.93445	9.24683	5.09892	1.26045	1.06951	1.86367	3.91546	0.92466	1.26645	1.87393	Q28HE9	sp|Q28HE9|CELF1_XENTR CUGBP Elav-like family member 1 OS=Xenopus tropicalis GN=celf1 PE=2 SV=1	2e-29
KH.S562.8.v1.A.SL1-1	181	879	1040	652	474	151	963	483	527	504	7.06338	35.85	37.4245	23.5568	18.2274	5.82776	34.425	19.4088	21.9433	18.2932	5.07547	1.04392	0.629449	0.773762	5.90707	0.563799	1.13058	0.833661	Q5F425	sp|Q5F425|LIN7C_CHICK Protein lin-7 homolog C OS=Gallus gallus GN=LIN7C PE=1 SV=1	1e-54
KH.C9.130.v2.A.SL7-1	116	559	582	321	172	106	625	247	299	183	5.19844	26.1814	24.0507	13.3185	7.59549	4.69798	25.6571	11.398	14.2969	7.62768	5.0364	0.918616	0.553769	0.570296	5.46131	0.444243	1.25434	0.533519	Q9IA79	sp|Q9IA79|BI1_PAROL Probable Bax inhibitor 1 OS=Paralichthys olivaceus GN=tmbim6 PE=2 SV=1	9e-43
KH.S389.8.v1.A.SL1-1	44	212	214	172	180	33	333	120	146	199	1.43625	7.23234	6.44139	5.19805	5.78977	1.06532	9.95713	4.03343	5.08494	6.04165	5.03558	0.890637	0.806977	1.11383	9.34659	0.40508	1.2607	1.18815	Q8K2A8	sp|Q8K2A8|ALG3_MOUSE Dol-P-Man:Man(5)GlcNAc(2)-PP-Dol alpha-1,3-mannosyltransferase OS=Mus musculus GN=Alg3 PE=2 SV=2	2e-53
KH.L40.3.v1.A.SL1-1	21	101	174	161	192	39	190	102	123	207	0.748583	3.76278	5.71951	5.31351	6.74425	1.37491	6.20423	3.74402	4.67824	6.86305	5.02653	1.52002	0.929016	1.26926	4.51244	0.603462	1.24952	1.46702	Q6GLN5	sp|Q6GLN5|NFIP1_XENLA NEDD4 family-interacting protein 1 OS=Xenopus laevis GN=ndfip1 PE=2 SV=1	3e-05
KH.S514.3.v1.A.SL1-1	197	947	1088	728	214	151	1021	638	480	229	6.51972	32.7551	33.2032	22.3064	6.97893	4.94231	30.9529	21.742	16.9496	7.04895	5.024	1.01368	0.671814	0.312867	6.26284	0.702423	0.779579	0.415876	Q71SS4	sp|Q71SS4|DERL1_BOVIN Derlin-1 OS=Bos taurus GN=DERL1 PE=2 SV=1	4e-44
KH.C4.701.v2.A.SL2-1	89	427	397	155	137	85	496	171	110	147	1.59004	7.9728	6.54028	2.5638	2.41185	1.50185	8.11731	3.14579	2.09684	2.44264	5.01423	0.820324	0.392001	0.940731	5.40487	0.387541	0.666555	1.16492	Q925Q3	sp|Q925Q3|NCKX6_MOUSE Sodium/potassium/calcium exchanger 6, mitochondrial OS=Mus musculus GN=Slc8b1 PE=2 SV=2	3e-19
KH.C3.952.v1.A.SL1-1	82	393	287	115	2	32	201	75	21	1	6.18167	30.9635	19.9509	8.02648	0.148571	2.38579	13.8804	5.82197	1.68915	0.0701161	5.00893	0.644335	0.402311	0.0185101	5.81793	0.419439	0.290133	0.0415098	Q4LDE5	sp|Q4LDE5|SVEP1_HUMAN Sushi, von Willebrand factor type A, EGF and pentraxin domain-containing protein 1 OS=Homo sapiens GN=SVEP1 PE=1 SV=3	0.039
KH.C10.77.v1.A.SL2-1	75	358	385	338	230	82	388	241	387	283	2.91927	14.5634	13.8186	12.1805	8.82172	3.15659	13.8343	9.65933	16.0724	10.2453	4.98871	0.948856	0.881459	0.724249	4.38269	0.698215	1.66392	0.637448	A2VDZ5	sp|A2VDZ5|CF120_BOVIN UPF0669 protein C6orf120 homolog OS=Bos taurus PE=2 SV=1	1e-11
KH.C11.194.v1.C.SL2-1	26	122	323	154	0	58	213	203	136	0	1.09887	5.38887	12.5882	6.02598	0	2.42432	8.2464	8.83455	6.13291	0	4.90402	2.33596	0.478701	0	3.40153	1.07132	0.694196	0	Q00711	sp|Q00711|DHSA_YEAST Succinate dehydrogenase [ubiquinone] flavoprotein subunit, mitochondrial OS=Saccharomyces cerevisiae (strain ATCC 204508 / S288c) GN=SDH1 PE=1 SV=1	2.2
KH.C8.146.v1.A.SL2-1	452	2116	2126	509	65	272	1475	776	325	59	22.8303	111.701	99.0207	23.8027	3.23519	13.5873	68.2463	40.3601	17.5151	2.77174	4.89264	0.886483	0.240381	0.135917	5.0228	0.591389	0.433971	0.158248	Q60528	sp|Q60528|MUC1_MESAU Mucin-1 OS=Mesocricetus auratus GN=MUC1 PE=2 SV=1	0.57
KH.L164.15.v1.A.SL1-1	62	288	392	277	239	54	333	177	200	285	2.46191	11.952	14.3534	10.1835	9.3517	2.12063	12.1126	7.2372	8.47358	10.5257	4.85475	1.20093	0.70948	0.918322	5.7118	0.597493	1.17084	1.24218	Q8N2U9	sp|Q8N2U9|PQLC1_HUMAN PQ-loop repeat-containing protein 1 OS=Homo sapiens GN=PQLC1 PE=2 SV=1	7e-59
KH.C8.208.v1.A.SL1-1	488	2251	2025	1519	1106	286	2108	1105	1242	1134	11.887	57.3053	45.4849	34.2568	26.5473	6.88985	47.0367	27.7161	32.2798	25.6917	4.82083	0.793729	0.753146	0.774951	6.82696	0.589244	1.16466	0.795905	P31409	sp|P31409|VATB_DROME V-type proton ATPase subunit B OS=Drosophila melanogaster GN=Vha55 PE=2 SV=1	0
KH.C12.283.v1.A.nonSL1-1	28	129	99	69	59	26	121	60	64	85	1.52293	7.33292	4.9653	3.47461	3.16217	1.39857	6.02865	3.36039	3.71413	4.29998	4.81502	0.677124	0.699778	0.91008	4.31057	0.557403	1.10527	1.15773	Q6J3Q7	sp|Q6J3Q7|COX17_CANFA Cytochrome c oxidase copper chaperone OS=Canis familiaris GN=COX17 PE=3 SV=3	3e-11
KH.S521.2.v1.A.ND1-1	72	330	321	255	275	63	354	191	217	305	1.4821	7.09948	6.09313	4.85984	5.57816	1.28256	6.67518	4.04852	4.76609	5.83945	4.79013	0.85825	0.797593	1.14781	5.20458	0.606504	1.17724	1.22521	Q6GMH0	sp|Q6GMH0|PRP18_DANRE Pre-mRNA-splicing factor 18 OS=Danio rerio GN=prpf18 PE=2 SV=1	1e-26
KH.C9.580.v2.A.SL2-1	147	673	800	407	345	153	768	426	279	334	3.05932	14.6382	15.3528	7.84219	7.0752	3.14912	14.6414	9.12923	6.19539	6.46518	4.7848	1.04881	0.5108	0.902197	4.64935	0.623522	0.678632	1.04355	P11416	sp|P11416|RARA_MOUSE Retinoic acid receptor alpha OS=Mus musculus GN=Rara PE=1 SV=1	2e-77
KH.C11.389.v2.B.SL2-2	25	114	259	871	896	45	218	389	645	1009	0.217321	1.0357	2.07611	7.00996	7.67506	0.38687	1.73593	3.482	5.98243	8.15791	4.76575	2.00455	3.37648	1.09488	4.48711	2.00584	1.7181	1.36364	Q80W68	sp|Q80W68|KIRR1_MOUSE Kin of IRRE-like protein 1 OS=Mus musculus GN=Kirrel PE=1 SV=1	3e-05
KH.S1293.2.v1.A.ND1-1	22	100	42	18	9	30	122	23	17	13	0.780545	3.70802	1.37408	0.591266	0.314652	1.05266	3.96505	0.840272	0.643548	0.428988	4.75055	0.370571	0.430298	0.532166	3.7667	0.21192	0.76588	0.666598	Q8R0A2	sp|Q8R0A2|ZBT44_MOUSE Zinc finger and BTB domain-containing protein 44 OS=Mus musculus GN=Zbtb44 PE=1 SV=2	1e-09
KH.C4.37.v1.A.SL2-1	53	240	288	182	165	64	289	152	123	158	2.00106	9.47027	10.0269	6.36197	6.13876	2.38977	9.99531	5.90943	4.95503	5.5484	4.73262	1.05878	0.634491	0.964916	4.18254	0.59122	0.838496	1.11975	Q9BSG0	sp|Q9BSG0|PADC1_HUMAN Protease-associated domain-containing protein 1 OS=Homo sapiens GN=PRADC1 PE=1 SV=1	4e-14
KH.L37.28.v4.A.nonSL3-1	65	293	331	229	305	73	321	179	203	290	1.40705	6.62874	6.60715	4.58953	6.50592	1.56283	6.36525	3.98995	4.68867	5.83877	4.71108	0.996743	0.694631	1.41756	4.07291	0.626833	1.17512	1.24529	Q01650	sp|Q01650|LAT1_HUMAN Large neutral amino acids transporter small subunit 1 OS=Homo sapiens GN=SLC7A5 PE=1 SV=2	4e-84
KH.L51.5.v1.A.nonSL2-1	23	103	106	21	5	33	110	34	21	9	0.728716	3.41062	3.09688	0.616006	0.156103	1.03403	3.19254	1.10924	0.709914	0.265215	4.68032	0.908011	0.198911	0.253412	3.08746	0.347448	0.64	0.373588	P09484	sp|P09484|ACHB2_CHICK Neuronal acetylcholine receptor subunit beta-2 OS=Gallus gallus GN=CHRNB2 PE=1 SV=1	9e-106
KH.L22.24.v4.A.SL3-2	45	201	292	489	82	60	271	335	255	62	1.66163	7.75682	9.94245	16.7173	2.98365	2.19111	9.16651	12.7375	10.0466	2.12931	4.6682	1.28177	1.68141	0.178477	4.18351	1.38957	0.788742	0.211944	B0C8B9	sp|B0C8B9|Y3954_ACAM1 UPF0102 protein AM1_3954 OS=Acaryochloris marina (strain MBIC 11017) GN=AM1_3954 PE=3 SV=1	0.98
KH.C1.1265.v1.A.SL1-1	390	1739	2576	1319	434	307	1814	1279	1010	468	13.5401	63.0989	82.4689	42.3971	14.8476	10.5411	57.6908	45.7239	37.4139	15.1122	4.66016	1.30698	0.514097	0.350204	5.47295	0.792569	0.818258	0.403919	P41732	sp|P41732|TSN7_HUMAN Tetraspanin-7 OS=Homo sapiens GN=TSPAN7 PE=1 SV=2	1e-21
KH.C14.166.v2.B.SL2-2	98	436	545	305	185	49	242	206	146	119	2.76125	12.8391	14.1601	7.95638	5.13646	1.36542	6.2461	5.97674	4.38924	3.11855	4.64972	1.10289	0.561888	0.645578	4.57448	0.956876	0.734387	0.710499	Q62720	sp|Q62720|ZNT1_RAT Zinc transporter 1 OS=Rattus norvegicus GN=Slc30a1 PE=2 SV=1	4e-23
KH.C1.466.v1.A.SL1-1	188	835	1156	641	248	137	1002	511	609	297	14.0325	65.1374	79.5654	44.2966	18.2407	10.1132	68.5107	39.2749	48.5011	20.6186	4.64189	1.2215	0.556733	0.411785	6.77439	0.573267	1.23491	0.425117	P52758	sp|P52758|UK114_HUMAN Ribonuclease UK114 OS=Homo sapiens GN=HRSP12 PE=1 SV=1	1e-24
KH.C12.15.v1.A.SL1-1	72	317	414	310	98	85	258	198	187	93	3.69435	16.9993	19.5882	14.7266	4.955	4.31335	12.1266	10.4613	10.2377	4.43828	4.60143	1.1523	0.751809	0.336466	2.81141	0.862679	0.978624	0.433522
KH.S765.1.v1.A.nonSL4-1	88	387	244	74	48	88	641	214	63	51	1.79112	8.23225	4.57952	1.39447	0.962707	1.77139	11.9512	4.4851	1.36816	0.965467	4.59615	0.55629	0.304501	0.690377	6.7468	0.375283	0.305047	0.705666	Q6HI76	sp|Q6HI76|Y2424_BACHK Putative ABC transporter ATP-binding protein BT9727_2424 OS=Bacillus thuringiensis subsp. konkukian (strain 97-27) GN=BT9727_2424 PE=3 SV=1	1.7
KH.C8.633.v2.A.SL2-1	107	468	523	372	233	72	427	245	290	285	5.59799	25.5894	25.2313	18.0188	12.012	3.72539	20.464	13.1987	16.1884	13.8682	4.57118	0.986003	0.714147	0.666638	5.49311	0.644973	1.22651	0.856676	Q2TA24	sp|Q2TA24|VATO_BOVIN V-type proton ATPase 21 kDa proteolipid subunit OS=Bos taurus GN=ATP6V0B PE=2 SV=1	3e-36
KH.C14.132.v2.A.nonSL19-1	30	130	117	58	46	27	150	54	41	56	1.13742	5.15119	4.09047	2.03592	1.71857	1.0124	5.20958	2.10819	1.65859	1.97475	4.52885	0.794082	0.497724	0.844125	5.14577	0.404675	0.786737	1.19062	Q9CY57	sp|Q9CY57|CHTOP_MOUSE Chromatin target of PRMT1 protein OS=Mus musculus GN=Chtop PE=1 SV=2	2e-05
KH.C11.501.v1.A.SL1-1	299	1294	1704	1401	693	230	1488	681	1214	862	15.1024	68.3084	79.3656	65.516	34.4921	11.4893	68.8478	35.4191	65.4258	40.4955	4.52303	1.16187	0.825496	0.526468	5.99236	0.514456	1.84719	0.618954	P63100	sp|P63100|CANB1_RAT Calcineurin subunit B type 1 OS=Rattus norvegicus GN=Ppp3r1 PE=1 SV=2	2e-62
KH.C9.406.v1.R.ND1-1	55	238	252	71	35	71	282	158	44	28	0.918162	4.1524	3.87923	1.09736	0.575753	1.17221	4.3124	2.716	0.783728	0.434751	4.52252	0.934214	0.282881	0.52467	3.67886	0.629813	0.288559	0.554721	Q9NSD5	sp|Q9NSD5|S6A13_HUMAN Sodium- and chloride-dependent GABA transporter 2 OS=Homo sapiens GN=SLC6A13 PE=1 SV=3	1e-42
KH.S918.2.v1.A.ND1-1	46	199	303	309	200	39	383	259	335	211	1.88268	8.51212	11.4354	11.7088	8.06604	1.57861	14.3592	10.9153	14.6292	8.03206	4.52128	1.34342	1.02391	0.688887	9.09614	0.760159	1.34025	0.549044	Q640R7	sp|Q640R7|RAP1B_XENTR Ras-related protein Rap-1b OS=Xenopus tropicalis GN=rap1b PE=2 SV=1	9e-24
KH.S164.23.v2.A.SL1-1	39	168	186	235	191	33	213	133	229	217	1.40014	6.30351	6.15756	7.81106	6.75697	1.17169	7.00486	4.91672	8.772	7.2459	4.50206	0.976846	1.26853	0.865052	5.97845	0.701901	1.78412	0.826026	Q6GR08	sp|Q6GR08|I4E3A_XENLA Eukaryotic translation initiation factor 4E type 3-A OS=Xenopus laevis GN=eif4e3-a PE=2 SV=1	4e-27
KH.C1.89.v1.A.ND2-1	47	202	196	210	167	40	327	136	205	171	1.30881	5.8789	5.03296	5.41419	4.58255	1.10161	8.34141	3.89973	6.091	4.42895	4.49179	0.856106	1.07575	0.846397	7.572	0.467514	1.5619	0.72713	Q9R0Q9	sp|Q9R0Q9|MPU1_MOUSE Mannose-P-dolichol utilization defect 1 protein OS=Mus musculus GN=Mpdu1 PE=2 SV=1	5e-37
KH.C2.90.v1.A.SL1-1	498	2136	2093	1685	1563	443	3329	1455	1345	1672	10.9476	49.0745	42.4274	34.2944	33.8578	9.63125	67.0371	32.9358	31.5476	34.1862	4.48268	0.864551	0.808308	0.98727	6.96038	0.491307	0.957853	1.08364	Q6DED0	sp|Q6DED0|TR1L1_XENLA Translocating chain-associated membrane protein 1-like 1 OS=Xenopus laevis GN=tram1l1 PE=2 SV=1	2e-32
KH.C11.623.v1.A.SL1-1	240	1029	750	509	145	197	1153	457	578	228	12.6145	56.525	36.3504	24.7692	7.50998	10.2404	55.5139	24.7339	32.4148	11.146	4.48095	0.643085	0.681401	0.303198	5.42108	0.445544	1.31054	0.343856	P50238	sp|P50238|CRIP1_HUMAN Cysteine-rich protein 1 OS=Homo sapiens GN=CRIP1 PE=1 SV=3	8e-22
KH.C2.36.v3.A.nonSL10-1	309	1319	756	267	96	177	1108	338	213	94	9.90792	44.2013	22.3529	7.9263	3.03324	5.61291	32.5445	11.1598	7.28719	2.80335	4.46121	0.505708	0.354598	0.382681	5.79815	0.34291	0.652984	0.384696	O46414	sp|O46414|FRIH_BOVIN Ferritin heavy chain OS=Bos taurus GN=FTH1 PE=2 SV=3	3e-26
KH.C2.418.v1.A.SL1-2	345	1472	1704	660	333	196	1602	625	501	381	7.22318	32.2094	32.8978	12.7935	6.87013	4.05841	30.7245	13.4743	11.1919	7.41925	4.45918	1.02137	0.388885	0.537003	7.57058	0.438552	0.83061	0.662913	Q6AYS4	sp|Q6AYS4|FUCO2_RAT Plasma alpha-L-fucosidase OS=Rattus norvegicus GN=Fuca2 PE=2 SV=1	9e-100
KH.C7.413.v1.A.SL1-1	126	537	863	696	637	134	699	468	535	687	2.68266	11.9491	16.9432	13.7195	13.3643	2.82156	13.6328	10.2602	12.1536	13.6043	4.4542	1.41794	0.809739	0.974108	4.83165	0.752614	1.18453	1.11937	Q5ZKJ5	sp|Q5ZKJ5|TM180_CHICK Transmembrane protein 180 OS=Gallus gallus GN=TMEM180 PE=2 SV=1	4e-05
KH.C1.53.v1.A.nonSL4-1	24	102	125	58	18	15	107	40	48	23	1.24129	5.51351	5.96157	2.77732	0.917374	0.767262	5.06943	2.13029	2.64886	1.10641	4.44176	1.08127	0.46587	0.33031	6.60717	0.420223	1.24343	0.417692	Q5RDU7	sp|Q5RDU7|YPEL5_PONAB Protein yippee-like 5 OS=Pongo abelii GN=YPEL5 PE=2 SV=1	1e-44
KH.C10.374.v1.A.SL3-1	120	507	577	546	299	108	490	284	421	344	3.96272	17.4979	17.5702	16.6932	9.72961	3.52717	14.8225	9.65711	14.8337	10.5657	4.41563	1.00413	0.950087	0.582848	4.20238	0.651517	1.53604	0.712272	Q5S3G4	sp|Q5S3G4|COX5B_PIG Cytochrome c oxidase subunit 5B, mitochondrial OS=Sus scrofa GN=COX5B PE=2 SV=1	4e-05
KH.C3.439.v1.A.SL1-1	249	1050	1345	1161	1203	320	1129	841	763	1156	5.96903	26.3063	29.7314	25.7675	28.4173	7.58656	24.792	20.7595	19.5158	25.7744	4.40713	1.1302	0.866675	1.10283	3.26788	0.837347	0.940087	1.3207	Q9TU53	sp|Q9TU53|CUBN_CANFA Cubilin OS=Canis familiaris GN=CUBN PE=1 SV=1	2e-11
KH.C14.227.v1.B.SL1-1	126	531	449	617	357	97	922	393	490	428	6.53169	28.7684	21.463	29.6125	18.2362	4.97298	43.7823	20.978	27.1024	20.636	4.40443	0.746061	1.3797	0.615829	8.80404	0.479143	1.29194	0.761408	P36914	sp|P36914|AMYG_ASPOR Glucoamylase OS=Aspergillus oryzae (strain ATCC 42149 / RIB 40) GN=glaA PE=2 SV=2	4
KH.C10.384.v4.A.SL4-1	38	160	131	85	114	61	206	101	79	137	0.846445	3.72479	2.69076	1.75295	2.50226	1.3438	4.20335	2.31661	1.87758	2.83832	4.40051	0.722394	0.651469	1.42746	3.12795	0.551135	0.810485	1.51169	Q9JIM1	sp|Q9JIM1|S29A1_MOUSE Equilibrative nucleoside transporter 1 OS=Mus musculus GN=Slc29a1 PE=1 SV=3	5e-18
KH.L24.12.v1.A.ND1-1	1470	6173	4457	2163	262	625	4146	1465	1259	267	205.56	902.16	574.715	280.035	36.1023	86.4354	531.085	210.948	187.847	34.7263	4.38879	0.637043	0.487259	0.12892	6.14429	0.397203	0.890487	0.184865	Q08886	sp|Q08886|GPB1_YEAST Guanine nucleotide-binding protein subunit beta 1 OS=Saccharomyces cerevisiae (strain ATCC 204508 / S288c) GN=GPB1 PE=1 SV=1	3.4
KH.C7.430.v2.C.SL1-1	96	403	480	340	311	87	415	289	257	407	2.98728	13.1062	13.7732	9.79533	9.53624	2.67741	11.8295	9.26018	8.53286	11.7795	4.38733	1.05089	0.711187	0.97355	4.41826	0.782805	0.921456	1.38048	Q90632	sp|Q90632|MOT3_CHICK Monocarboxylate transporter 3 OS=Gallus gallus GN=SLC16A3 PE=2 SV=2	0.0003
KH.C1.584.v1.A.SL1-1	51	214	181	152	107	38	335	101	128	126	1.65877	7.27437	5.42853	4.57714	3.42934	1.22233	9.98098	3.38262	4.44203	3.81164	4.38541	0.746255	0.843163	0.749233	8.16552	0.338907	1.31319	0.858085	Q5U1V9	sp|Q5U1V9|TSN31_RAT Tetraspanin-31 OS=Rattus norvegicus GN=Tspan31 PE=2 SV=1	6e-12
KH.L37.56.v2.A.SL2-1	53	222	208	116	62	55	249	113	118	86	2.14976	9.41092	7.77974	4.35618	2.47809	2.20631	9.25179	4.71964	5.10683	3.24442	4.37767	0.826672	0.559939	0.568867	4.19333	0.510132	1.08204	0.635311	Q8QL53	sp|Q8QL53|POLN_SLDV Non-structural polyprotein OS=Sleeping disease virus PE=2 SV=1	1.8
KH.C5.177.v1.A.SL2-1	69	289	285	236	201	80	362	212	222	201	1.21029	5.29793	4.60973	3.83256	3.47416	1.38779	5.81653	3.82908	4.15481	3.27917	4.37739	0.870101	0.831407	0.906485	4.19123	0.658311	1.08507	0.789247	P70187	sp|P70187|HIAT1_MOUSE Hippocampus abundant transcript 1 protein OS=Mus musculus GN=Hiat1 PE=2 SV=3	1e-93
KH.C11.601.v1.C.nonSL2-1	86	359	374	233	185	72	433	193	241	253	4.13632	18.0458	16.5873	10.3754	8.76797	3.42482	19.0773	9.5585	12.3677	11.3178	4.36277	0.919178	0.625505	0.84507	5.57029	0.501041	1.2939	0.91511	Q5R8A2	sp|Q5R8A2|APC11_PONAB Anaphase-promoting complex subunit 11 OS=Pongo abelii GN=ANAPC11 PE=3 SV=1	7e-25
KH.C2.1047.v1.A.SL1-1	52	217	231	214	164	52	336	192	230	166	2.73632	11.9341	11.2089	10.4259	8.50392	2.70618	16.1963	10.4035	12.9136	8.12451	4.36137	0.939236	0.93014	0.815656	5.98492	0.642341	1.24127	0.629144	Q9BTE1	sp|Q9BTE1|DCTN5_HUMAN Dynactin subunit 5 OS=Homo sapiens GN=DCTN5 PE=1 SV=1	2e-59
KH.C4.292.v1.B.ND1-1	226	942	778	659	610	209	1194	532	678	637	6.06959	26.4404	19.2672	16.386	16.1433	5.55121	29.3744	14.7123	19.4284	15.9117	4.35621	0.728704	0.850457	0.985193	5.29152	0.500854	1.32056	0.818991	Q7SY29	sp|Q7SY29|SPX2_DANRE Sugar phosphate exchanger 2 OS=Danio rerio GN=slc37a2 PE=2 SV=1	1e-93
KH.C2.554.v2.A.SL1-1	30	125	221	157	116	21	227	151	214	141	0.983512	4.28287	6.68097	4.76533	3.74738	0.680876	6.81706	5.09744	7.48563	4.29936	4.35467	1.55993	0.71327	0.786385	10.0122	0.747747	1.46851	0.574348	Q0P4J9	sp|Q0P4J9|PORED_XENTR Polyprenol reductase OS=Xenopus tropicalis GN=srd5a3 PE=2 SV=1	2e-10
KH.C9.561.v2.A.nonSL4-1	52	216	609	439	48	57	250	437	190	47	0.813245	3.53051	8.78262	6.35649	0.739726	0.881623	3.58155	7.03746	3.1705	0.683662	4.34127	2.48763	0.723758	0.116373	4.06245	1.96492	0.450517	0.215632	Q6XDT4	sp|Q6XDT4|IKZF_OIKDI Ikaros family zinc finger protein OS=Oikopleura dioica PE=2 SV=1	4e-53
KH.C7.141.v1.A.SL1-1	40	166	207	307	234	37	282	228	258	253	0.989778	4.29291	4.72321	7.03318	5.70566	0.905462	6.39205	5.80938	6.81168	5.8227	4.33725	1.10023	1.48907	0.811249	7.05944	0.908844	1.17253	0.854812	B4HQ29	sp|B4HQ29|FBSP1_DROSE F-box/SPRY domain-containing protein 1 OS=Drosophila sechellia GN=Fsn PE=3 SV=1	2e-66
KH.C10.463.v1.A.SL1-1	354	1457	1495	813	622	285	2110	1774	587	605	6.82789	29.3703	26.5897	14.5181	11.8219	5.43649	37.2803	35.2333	12.0803	10.8534	4.30152	0.905324	0.546004	0.814285	6.85741	0.945094	0.342866	0.898435	Q91XE9	sp|Q91XE9|CR3L3_MOUSE Cyclic AMP-responsive element-binding protein 3-like protein 3 OS=Mus musculus GN=Creb3l3 PE=2 SV=1	1e-20
KH.C2.506.v1.A.SL4-1	59	242	314	202	134	61	315	242	184	131	1.60355	6.87404	7.86954	5.08297	3.58879	1.63965	7.8425	6.77272	5.33587	3.31152	4.28676	1.14482	0.645904	0.706041	4.78303	0.863592	0.787847	0.620616	Q9Z2Z8	sp|Q9Z2Z8|DHCR7_RAT 7-dehydrocholesterol reductase OS=Rattus norvegicus GN=Dhcr7 PE=2 SV=1	1e-102
KH.C9.350.v1.B.nonSL2-1	30	123	146	109	123	27	140	71	74	130	0.678928	2.9092	3.0468	2.28383	2.74296	0.604305	2.90231	1.65454	1.78686	2.73635	4.28499	1.0473	0.749584	1.20103	4.80272	0.570078	1.07997	1.53137	Q9JLI7	sp|Q9JLI7|SPAG6_MOUSE Sperm-associated antigen 6 OS=Mus musculus GN=Spag6 PE=1 SV=1	2e-159
KH.C5.72.v1.A.SL3-1	63	257	183	143	124	52	901	261	114	126	1.61445	6.88309	4.32438	3.39278	3.13125	1.31789	21.1506	6.88718	3.11706	3.00317	4.26343	0.628262	0.784569	0.922916	16.0489	0.325626	0.452589	0.963464	F7C1E2	sp|F7C1E2|SARAF_XENTR Store-operated calcium entry-associated regulatory factor OS=Xenopus tropicalis GN=tmem66 PE=3 SV=2	1e-24
KH.C11.625.v1.A.SL1-1	65	265	313	345	451	58	388	222	307	470	1.79025	7.62803	7.94939	8.79741	12.2402	1.57986	9.78916	6.29608	9.02184	12.0399	4.26087	1.04213	1.10668	1.39134	6.19622	0.643169	1.43293	1.33453	Q78KK3	sp|Q78KK3|S22AI_MOUSE Solute carrier family 22 member 18 OS=Mus musculus GN=Slc22a18 PE=2 SV=2	1e-08
KH.C14.561.v1.A.SL2-1	29	118	110	91	109	33	214	96	118	114	1.61215	6.85578	5.63885	4.68366	5.971	1.81432	10.8977	5.49537	6.99918	5.8944	4.25256	0.822495	0.830606	1.27486	6.00652	0.504268	1.27365	0.842156	Q63829	sp|Q63829|COMD3_MOUSE COMM domain-containing protein 3 OS=Mus musculus GN=Commd3 PE=2 SV=1	5e-09
KH.C2.124.v1.A.SL2-1	180	732	690	314	142	137	780	336	244	198	4.93661	20.9814	17.4499	7.97299	3.83757	3.71593	19.5958	9.48882	7.14007	5.05065	4.25015	0.831688	0.456906	0.481322	5.27347	0.484226	0.752471	0.707367	Q5F3X0	sp|Q5F3X0|LCLT1_CHICK Lysocardiolipin acyltransferase 1 OS=Gallus gallus GN=LCLAT1 PE=2 SV=1	1e-35
KH.C4.123.v1.A.SL1-1	186	753	776	355	256	159	1115	450	304	251	8.36854	35.4077	32.1949	14.7877	11.3498	7.07497	45.9542	20.8481	14.5937	10.5036	4.23105	0.909263	0.459318	0.767518	6.49532	0.453671	0.700004	0.71973	Q5R801	sp|Q5R801|AAKB1_PONAB 5'-AMP-activated protein kinase subunit beta-1 OS=Pongo abelii GN=PRKAB1 PE=2 SV=3	3e-37
KH.C14.95.v1.B.SL1-1	67	271	369	117	26	61	478	203	58	26	1.56071	6.59754	7.92614	2.52329	0.596804	1.40529	10.1997	4.86922	1.44155	0.563308	4.22728	1.20138	0.318351	0.236518	7.25806	0.477388	0.296054	0.390764	Q6T310	sp|Q6T310|RSLBA_HUMAN Ras-like protein family member 11A OS=Homo sapiens GN=RASL11A PE=2 SV=1	2e-13
KH.C8.467.v2.A.nonSL2-1	32	129	122	55	51	23	118	80	57	54	0.777804	3.277	2.73444	1.23771	1.22153	0.55289	2.62734	2.00229	1.47826	1.22079	4.21314	0.834435	0.452636	0.986925	4.75201	0.762099	0.738286	0.825826	P32261	sp|P32261|ANT3_MOUSE Antithrombin-III OS=Mus musculus GN=Serpinc1 PE=1 SV=1	2e-30
KH.C8.514.v1.A.SL1-1	97	391	398	463	365	65	403	363	311	340	2.35267	9.91134	8.90146	10.3969	8.72357	1.55917	8.95381	9.06594	8.04834	7.66998	4.2128	0.898109	1.168	0.839052	5.74268	1.01252	0.887755	0.95299	B0S5Y3	sp|B0S5Y3|S5A3A_DANRE Solute carrier family 52, riboflavin transporter, member 3-A OS=Danio rerio GN=slc52a3a PE=2 SV=1	1e-27
KH.C7.763.v1.A.nonSL2-1	41	165	146	89	47	29	150	63	79	46	2.1475	9.03234	7.05167	4.31594	2.42583	1.50224	7.19705	3.39788	4.41503	2.24096	4.20597	0.780713	0.612045	0.562063	4.79089	0.472121	1.29935	0.507575	Q0VE29	sp|Q0VE29|SAM12_MOUSE Sterile alpha motif domain-containing protein 12 OS=Mus musculus GN=Samd12 PE=2 SV=1	1e-09
KH.S663.4.v1.A.SL2-1	109	437	494	157	71	56	408	226	135	87	6.60224	27.6638	27.5918	8.8044	4.23775	3.35462	22.638	14.0958	8.72479	4.90128	4.19007	0.997397	0.319094	0.481322	6.74831	0.622661	0.618963	0.561766	Q9Y6I9	sp|Q9Y6I9|TX264_HUMAN Testis-expressed sequence 264 protein OS=Homo sapiens GN=TEX264 PE=1 SV=1	0.15
KH.C8.617.v2.R.ND2-1	30	120	135	113	90	22	163	80	84	101	1.01207	4.23095	4.19965	3.52942	2.99188	0.734012	5.03722	2.77905	3.02361	3.16911	4.18048	0.992602	0.84041	0.847697	6.86258	0.551704	1.088	1.04812	Q7SZN2	sp|Q7SZN2|RN170_DANRE E3 ubiquitin-protein ligase RNF170 OS=Danio rerio GN=rnf170 PE=2 SV=1	7e-42
KH.C1.129.v1.A.SL1-1	50	200	253	526	401	46	374	320	400	416	1.41232	5.90416	6.58979	13.7557	11.1614	1.28502	9.67713	9.30741	12.0553	10.929	4.18048	1.11613	2.08743	0.811401	7.53072	0.961794	1.29524	0.906573	Q9HBH0	sp|Q9HBH0|RHOF_HUMAN Rho-related GTP-binding protein RhoF OS=Homo sapiens GN=RHOF PE=1 SV=1	2e-31
KH.L96.103.v1.A.SL1-1	46	184	599	440	2	79	238	343	190	2	1.29529	5.41495	15.5534	11.4709	0.0554948	2.20003	6.13904	9.94538	5.70848	0.0523801	4.18048	2.87231	0.737517	0.00483787	2.79044	1.62002	0.573983	0.00917584	C3N749	sp|C3N749|RUBPS_SULIY Putative ribose 1,5-bisphosphate isomerase OS=Sulfolobus islandicus (strain Y.G.57.14 / Yellowstone #1) GN=YG5714_1786 PE=3 SV=1	0.37
KH.C4.249.v1.A.SL1-1	46	184	295	515	826	35	291	252	343	617	0.936265	3.91404	5.53671	9.70473	16.5666	0.70453	5.42559	5.28152	7.44889	11.6803	4.18048	1.41458	1.7528	1.70706	7.70101	0.973445	1.41037	1.56805	Q9VQU9	sp|Q9VQU9|BOWEL_DROME Protein bowel OS=Drosophila melanogaster GN=bowl PE=1 SV=1	2.5
KH.C9.533.v2.A.ND1-1	52	208	277	190	74	37	166	143	113	93	2.1379	8.93746	10.5015	7.23225	2.99798	1.50445	6.25181	6.05393	4.95701	3.55626	4.18048	1.175	0.688684	0.414529	4.15556	0.968348	0.818808	0.717421	Q66S17	sp|Q66S17|NATT3_THANI Natterin-3 OS=Thalassophryne nattereri PE=1 SV=1	0.031
KH.C2.199.v1.B.SL2-1	107	427	526	295	188	152	554	386	189	188	0.456484	1.90386	2.06927	1.1652	0.790336	0.641322	2.16503	1.69569	0.86032	0.745977	4.17071	1.08688	0.563096	0.678286	3.37589	0.783215	0.507357	0.867093	Q24292	sp|Q24292|DS_DROME Protein dachsous OS=Drosophila melanogaster GN=ds PE=1 SV=3	9e-46
KH.C12.142.v1.A.SL1-1	181	722	830	634	369	109	1089	468	521	455	6.18912	25.802	26.1708	20.0713	12.4334	3.6861	34.1108	16.4783	19.0084	14.4706	4.16893	1.01429	0.766933	0.619461	9.25389	0.483083	1.15354	0.761278	Q8WPW2	sp|Q8WPW2|PDX1_SUBDO Probable pyridoxine biosynthesis SNZERR OS=Suberites domuncula GN=SNZERR PE=2 SV=2	8e-84
KH.C11.286.v1.C.SL2-1	26	103	100	165	213	28	122	105	128	258	0.694976	2.8774	2.46482	4.08334	5.61033	0.740193	2.98724	2.89003	3.65059	6.4142	4.14028	0.856614	1.65665	1.37395	4.03575	0.96746	1.26317	1.75703	O89013	sp|O89013|OBRG_MOUSE Leptin receptor gene-related protein OS=Mus musculus GN=Leprot PE=1 SV=1	3e-26
KH.C5.611.v1.A.ND1-1	103	407	538	505	583	74	447	345	357	525	3.82825	15.8097	18.4388	17.3776	21.3522	2.7201	15.2189	13.2038	14.1575	18.1488	4.12975	1.1663	0.942444	1.22872	5.59498	0.867591	1.07223	1.28192	Q8TB40	sp|Q8TB40|ABHD4_HUMAN Abhydrolase domain-containing protein 4 OS=Homo sapiens GN=ABHD4 PE=2 SV=1	6e-53
KH.C9.280.v1.A.SL2-1	172	679	582	464	290	124	1008	351	481	297	4.8493	20.0072	15.1308	12.1117	8.05676	3.4575	26.033	10.19	14.4694	7.78812	4.12579	0.756268	0.800463	0.665207	7.52942	0.391427	1.41996	0.538246	P79110	sp|P79110|TXTP_BOVIN Tricarboxylate transport protein, mitochondrial OS=Bos taurus GN=SLC25A1 PE=2 SV=1	6e-78
KH.C14.553.v1.B.nonSL9-1	96	377	388	280	90	66	377	171	176	121	3.31011	13.5856	12.3365	8.93849	3.05791	2.25064	11.9076	6.07133	6.475	3.88045	4.10427	0.908057	0.724557	0.342106	5.29079	0.509869	1.06649	0.599297	Q5ZMD6	sp|Q5ZMD6|H2AZ_CHICK Histone H2A.Z OS=Gallus gallus GN=H2AFZ PE=1 SV=3	1e-46
KH.C2.128.v1.A.nonSL2-1	26	102	104	101	55	18	109	68	100	59	0.935651	3.83625	3.45114	3.36509	1.95036	0.640624	3.59319	2.5198	3.8397	1.97478	4.10009	0.899613	0.975067	0.579586	5.60889	0.701271	1.52381	0.514306	Q17QH8	sp|Q17QH8|D39U1_BOVIN Epimerase family protein SDR39U1 OS=Bos taurus GN=SDR39U1 PE=2 SV=1	4e-51
KH.C14.294.v1.A.SL1-1	48	188	272	245	125	50	220	180	158	172	1.1073	4.53262	5.78605	5.2327	2.84149	1.14074	4.64901	4.27577	3.889	3.69045	4.09339	1.27654	0.904365	0.543026	4.07545	0.919715	0.909545	0.948945	P11657	sp|P11657|PAC_STRMG Major cell-surface adhesin PAc OS=Streptococcus mutans GN=pac PE=1 SV=1	0.001
KH.C8.247.v2.A.SL3-1	32	125	223	105	21	27	192	146	45	25	0.373763	1.52589	2.40182	1.13546	0.241701	0.311889	2.05429	1.75597	0.56081	0.271589	4.0825	1.57405	0.472749	0.212866	6.58658	0.854782	0.319374	0.484281	P41969	sp|P41969|ELK1_MOUSE ETS domain-containing protein Elk-1 OS=Mus musculus GN=Elk1 PE=2 SV=3	8e-31
KH.C2.359.v2.B.SL2-2	45	175	342	483	252	63	203	319	301	259	0.33986	1.38131	2.38178	3.3773	1.87543	0.470564	1.40442	2.48082	2.42555	1.81934	4.06436	1.72429	1.41797	0.555303	2.98455	1.76644	0.977722	0.750072	P0C6U4	sp|P0C6U4|R1A_CVHN2 Replicase polyprotein 1a OS=Human coronavirus HKU1 (isolate N2) GN=1a PE=3 SV=1	3e-05
KH.C3.622.v1.A.SL1-1	170	661	696	634	428	101	968	472	602	402	5.42027	22.0262	20.463	18.7153	13.4471	3.18481	28.2723	15.4964	20.4798	11.9213	4.06367	0.929031	0.91459	0.718507	8.87721	0.548113	1.32158	0.582102	Q25531	sp|Q25531|VA0D_MANSE V-type proton ATPase subunit d OS=Manduca sexta PE=2 SV=1	3e-117
KH.L97.11.v1.A.ND1-1	43	167	210	299	219	28	156	139	220	276	1.32621	5.38303	5.97245	8.5379	6.6558	0.854069	4.4074	4.41445	7.23975	7.91734	4.05895	1.1095	1.42955	0.77956	5.16047	1.0016	1.64001	1.09359	P0CP96	sp|P0CP96|FKBP2_CRYNJ FK506-binding protein 2 OS=Cryptococcus neoformans var. neoformans serotype D (strain JEC21 / ATCC MYA-565) GN=FPR2 PE=3 SV=1	1e-13
KH.C4.362.v1.A.nonSL5-1	34	132	116	83	35	23	140	59	73	48	1.30105	5.27904	4.09319	2.94055	1.31976	0.870428	4.90745	2.32479	2.98053	1.70837	4.05752	0.775366	0.7184	0.448814	5.63797	0.473726	1.28207	0.573176	Q8BFQ8	sp|Q8BFQ8|PDDC1_MOUSE Parkinson disease 7 domain-containing protein 1 OS=Mus musculus GN=Pddc1 PE=1 SV=1	1e-39
KH.C11.608.v1.A.SL1-1	68	263	325	106	2	122	363	146	52	4	1.17144	4.73514	5.16277	1.69064	0.033951	2.07855	5.72836	2.58988	0.955807	0.0640909	4.04216	1.09031	0.327468	0.0200817	2.75594	0.452116	0.369054	0.0670542	Q9YGS0	sp|Q9YGS0|IRX4_CHICK Iroquois-class homeodomain protein IRX-4 OS=Gallus gallus GN=IRX4 PE=2 SV=1	7e-32
KH.C11.614.v1.A.SL1-1	30	116	210	259	288	36	154	176	216	275	1.43984	5.8186	9.29399	11.5088	13.6207	1.70878	6.77062	8.69809	11.0613	12.2759	4.04113	1.59729	1.2383	1.1835	3.96224	1.28468	1.27169	1.10981	Q9CY94	sp|Q9CY94|PSF3_MOUSE DNA replication complex GINS protein PSF3 OS=Mus musculus GN=Gins3 PE=2 SV=1	3e-11
KH.C1.432.v3.A.SL1-1	36	139	108	99	137	27	144	70	119	139	0.898159	3.62436	2.48464	2.28676	3.36808	0.6662	3.29099	1.79831	3.16777	3.22546	4.03532	0.685538	0.92036	1.47286	4.93994	0.546436	1.76152	1.01821	O54804	sp|O54804|CHKA_MOUSE Choline kinase alpha OS=Mus musculus GN=Chka PE=1 SV=3	3e-42
KH.C7.685.v1.A.nonSL2-1	109	420	547	342	59	75	464	307	244	91	4.63272	18.6563	21.438	13.4577	2.471	3.15254	18.0651	13.4358	11.0651	3.5973	4.02707	1.14911	0.627748	0.183613	5.73033	0.743745	0.823552	0.325103	Q61982	sp|Q61982|NOTC3_MOUSE Neurogenic locus notch homolog protein 3 OS=Mus musculus GN=Notch3 PE=1 SV=1	0.0001
KH.L65.1.v1.A.SL1-1	95	366	388	237	103	97	567	456	168	139	1.49243	6.00922	5.62072	3.44711	1.59448	1.50707	8.15957	7.37654	2.81603	2.03101	4.02646	0.935348	0.613286	0.462557	5.4142	0.904035	0.381754	0.721232	A3LTV8	sp|A3LTV8|RRG9_PICST Required for respiratory growth protein 9, mitochondrial OS=Scheffersomyces stipitis (strain ATCC 58785 / CBS 6054 / NBRC 10063 / NRRL Y-11545) GN=RRG9 PE=3 SV=2	2
KH.C14.147.v3.A.SL3-1	27	104	114	83	43	33	205	76	90	43	0.983354	3.95863	3.8286	2.79872	1.54321	1.18864	6.83932	2.85021	3.4974	1.4566	4.02565	0.967151	0.731004	0.5514	5.7539	0.416738	1.22707	0.416481	Q5UQI4	sp|Q5UQI4|DHCR7_MIMIV Probable 7-dehydrocholesterol reductase OS=Acanthamoeba polyphaga mimivirus GN=DHCR7 PE=3 SV=1	0.071
KH.C1.284.v1.A.SL1-1	136	523	530	630	567	118	839	453	715	666	6.41183	25.7698	23.0413	27.4991	26.3413	5.50193	36.2341	21.9917	35.9671	29.2041	4.0191	0.894122	1.19347	0.957898	6.58571	0.606932	1.63549	0.811966	Q5BJW3	sp|Q5BJW3|TX261_RAT Protein TEX261 OS=Rattus norvegicus GN=Tex261 PE=2 SV=1	2e-38
KH.C2.36.v2.A.ND1-1	265	1012	660	233	83	171	895	297	176	104	9.80113	39.118	22.5093	7.9785	3.02496	6.25485	30.3226	11.3111	6.94543	3.57758	3.99118	0.575421	0.354453	0.379139	4.84786	0.373024	0.614039	0.515098	O46414	sp|O46414|FRIH_BOVIN Ferritin heavy chain OS=Bos taurus GN=FTH1 PE=2 SV=3	8e-26
KH.C3.589.v1.A.SL3-1	178	678	854	539	225	146	805	366	496	272	7.83738	31.1994	34.6735	21.9723	9.76215	6.35762	32.4683	16.5939	23.3018	11.139	3.98085	1.11135	0.633691	0.444294	5.107	0.51108	1.40424	0.478032	Q98LT7	sp|Q98LT7|GCSH_RHILO Glycine cleavage system H protein OS=Rhizobium loti (strain MAFF303099) GN=gcvH PE=3 SV=1	6e-21
KH.C9.239.v1.A.SL1-1	108	409	509	609	738	61	451	420	529	939	3.75531	14.8632	16.3203	19.6053	25.2866	2.09769	14.3652	15.0379	19.6261	30.3678	3.95791	1.09804	1.20128	1.28978	6.84809	1.04683	1.30511	1.54732
KH.L4.44.v2.C.ND1-1	57	214	272	206	89	33	245	116	133	107	4.29701	16.8606	18.9082	14.3779	6.61141	2.46035	16.9189	9.00465	10.6979	7.50242	3.92378	1.12144	0.760405	0.459832	6.87662	0.532225	1.18805	0.701297	O75896	sp|O75896|TUSC2_HUMAN Tumor suppressor candidate 2 OS=Homo sapiens GN=TUSC2 PE=1 SV=3	9e-09
KH.C14.186.v1.A.nonSL2-1	73	274	290	232	196	57	415	188	234	250	4.43354	17.3918	16.2411	13.0452	11.7299	3.42368	23.0881	11.7572	15.1635	14.1219	3.92278	0.933835	0.803223	0.899176	6.74367	0.509229	1.28973	0.931309	Q5R5F2	sp|Q5R5F2|COPZ1_PONAB Coatomer subunit zeta-1 OS=Pongo abelii GN=COPZ1 PE=2 SV=1	3e-37
KH.C5.513.v1.A.SL1-1	43	161	222	371	408	64	254	206	299	528	0.792276	3.10027	3.77181	6.32873	7.40764	1.16621	4.28701	3.90834	5.87808	9.04831	3.91312	1.21661	1.6779	1.17048	3.67601	0.911669	1.50398	1.53933	Q28H54	sp|Q28H54|CEPT1_XENTR Choline/ethanolaminephosphotransferase 1 OS=Xenopus tropicalis GN=cept1 PE=2 SV=1	3e-70
KH.S811.1.v1.A.SL3-1	62	231	202	125	122	27	192	125	109	144	1.81112	7.05233	5.4412	3.38065	3.51177	0.780025	5.1377	3.75994	3.39733	3.9124	3.89391	0.771546	0.621305	1.03879	6.58658	0.731834	0.903558	1.15161	Q9D404	sp|Q9D404|OXSM_MOUSE 3-oxoacyl-[acyl-carrier-protein] synthase, mitochondrial OS=Mus musculus GN=Oxsm PE=1 SV=1	2e-98
KH.C1.476.v1.A.SL1-1	136	505	616	399	330	101	709	359	510	350	11.2647	43.7156	47.0488	30.5976	26.9342	8.27353	53.7946	30.6189	45.0719	26.9633	3.88078	1.07625	0.650337	0.880274	6.50201	0.569183	1.47203	0.598229	Q9D7J4	sp|Q9D7J4|COX20_MOUSE Cytochrome c oxidase protein 20 homolog OS=Mus musculus GN=Cox20 PE=2 SV=1	3.1
KH.S425.10.v1.A.SL1-1	132	489	515	677	437	142	805	483	577	476	3.42921	13.2768	12.3372	16.2833	11.187	3.64837	19.1571	12.9206	15.9938	11.5015	3.87169	0.929225	1.31986	0.68702	5.25086	0.674458	1.23785	0.719119	Q8IY50	sp|Q8IY50|S35F3_HUMAN Solute carrier family 35 member F3 OS=Homo sapiens GN=SLC35F3 PE=2 SV=2	6e-19
KH.C8.390.v1.A.nonSL20-1	43	159	123	57	19	38	189	46	60	35	2.189	8.4594	5.77391	2.6865	0.953107	1.91316	8.81356	2.4113	3.259	1.65718	3.86451	0.682544	0.465282	0.354777	4.60682	0.27359	1.35155	0.508495	Q5E9E4	sp|Q5E9E4|SSRB_BOVIN Translocon-associated protein subunit beta OS=Bos taurus GN=SSR2 PE=2 SV=1	2e-25
KH.C14.553.v1.B.nonSL10-1	101	373	423	264	83	91	369	172	194	106	3.42516	13.2201	13.2278	8.28894	2.77364	3.05205	11.463	6.00627	7.01969	3.34343	3.8597	1.00059	0.626628	0.334619	3.75585	0.523969	1.16873	0.476293	Q6YNC8	sp|Q6YNC8|H2AZ_SHEEP Histone H2A.Z OS=Ovis aries GN=H2AFZ PE=2 SV=3	3e-42
KH.C2.497.v1.A.SL1-1	159	587	603	439	482	114	593	344	320	474	7.32097	28.2472	25.6022	18.7142	21.8691	5.19118	25.0115	16.3097	15.7209	20.299	3.8584	0.906362	0.73096	1.16858	4.81806	0.65209	0.963898	1.29121	Q969T9	sp|Q969T9|WBP2_HUMAN WW domain-binding protein 2 OS=Homo sapiens GN=WBP2 PE=1 SV=1	2e-12
KH.L18.103.v1.A.ND1-1	137	503	532	404	289	109	564	303	270	277	3.12699	11.9989	11.1971	8.53734	6.50003	2.4605	11.7923	7.1214	6.57546	5.88046	3.83719	0.933182	0.762458	0.761366	4.79265	0.603903	0.923338	0.894305	Q9BX95	sp|Q9BX95|SGPP1_HUMAN Sphingosine-1-phosphate phosphatase 1 OS=Homo sapiens GN=SGPP1 PE=1 SV=2	2e-32
KH.C7.616.v1.A.SL1-1	70	257	334	285	226	71	258	215	195	250	1.79994	6.90653	7.91946	6.78485	5.72639	1.80555	6.07706	5.69267	5.34997	5.97897	3.83708	1.14666	0.856732	0.843996	3.36577	0.936747	0.9398	1.11757	Q1LZ71	sp|Q1LZ71|LFG2_BOVIN Protein lifeguard 2 OS=Bos taurus GN=FAIM2 PE=2 SV=1	5e-41
KH.C3.332.v1.A.SL1-1	295	1082	1260	560	196	176	1382	450	546	243	20.0084	76.6979	78.8042	35.1652	13.0996	11.8057	85.864	31.4282	39.5129	15.3293	3.83329	1.02746	0.446235	0.372516	7.27308	0.366023	1.25724	0.387957	O73817	sp|O73817|PSB3_ONCMY Proteasome subunit beta type-3 OS=Oncorhynchus mykiss GN=psmb3 PE=2 SV=1	7e-74
KH.C3.23.v1.A.SL3-1	65	238	236	132	180	65	334	100	139	212	4.93293	18.8771	16.5155	9.27473	13.461	4.87861	23.2194	7.81464	11.2555	14.9642	3.82675	0.874898	0.561576	1.45136	4.75944	0.336556	1.4403	1.32951	Q61CQ8	sp|Q61CQ8|SPCS1_CAEBR Probable signal peptidase complex subunit 1 OS=Caenorhabditis briggsae GN=CBG12804 PE=3 SV=1	5e-11
KH.C11.156.v1.A.nonSL3-1	63	229	182	71	60	45	293	68	90	61	3.59943	13.674	9.58856	3.75566	3.37797	2.54271	15.3347	4.00054	5.48646	3.24152	3.79893	0.701227	0.391682	0.899435	6.03084	0.260882	1.37143	0.590822	Q63ZZ0	sp|Q63ZZ0|TM242_XENLA Transmembrane protein 242 OS=Xenopus laevis GN=tmem242 PE=2 SV=1	1e-07
KH.S910.1.v2.A.SL2-2	49	178	287	392	321	30	158	253	296	384	1.05767	4.0155	5.71248	7.83385	6.82764	0.640421	3.12409	5.6233	6.81714	7.70923	3.79656	1.42261	1.37136	0.871557	4.87819	1.79998	1.2123	1.13086	Q8BGK6	sp|Q8BGK6|YLAT2_MOUSE Y+L amino acid transporter 2 OS=Mus musculus GN=Slc7a6 PE=1 SV=1	2e-10
KH.C11.136.v2.A.SL1-2	193	698	613	518	532	130	609	277	433	618	7.29297	27.5657	21.3598	18.1222	19.8094	4.85826	21.0803	10.7781	17.4579	21.7201	3.77976	0.774868	0.848429	1.0931	4.33907	0.511289	1.61975	1.24414	Q5BK09	sp|Q5BK09|DRAM2_RAT DNA damage-regulated autophagy modulator protein 2 OS=Rattus norvegicus GN=Dram2 PE=2 SV=1	1e-22
KH.C2.94.v1.A.ND1-1	174	629	688	574	372	155	688	406	406	412	5.26968	19.9091	19.2137	16.0947	11.1017	4.64255	19.0869	12.6613	13.1195	11.6053	3.77805	0.965074	0.837664	0.689776	4.1113	0.663348	1.03619	0.884587	P0AB89	sp|P0AB89|PUR8_ECOLI Adenylosuccinate lyase OS=Escherichia coli (strain K12) GN=purB PE=1 SV=1	0.88
KH.C9.859.v1.A.SL1-1	77	277	284	326	227	95	551	189	345	286	2.82482	10.6205	9.60741	11.0727	8.20611	3.44678	18.5167	7.13967	13.5044	9.75869	3.75972	0.90461	1.15251	0.741114	5.37218	0.385579	1.89146	0.722631	Q05144	sp|Q05144|RAC2_MOUSE Ras-related C3 botulinum toxin substrate 2 OS=Mus musculus GN=Rac2 PE=2 SV=1	6e-49
KH.C5.415.v1.A.nonSL19-1	52	187	230	86	25	34	248	80	106	25	1.80396	6.78002	7.35766	2.76221	0.854624	1.16652	7.88112	2.85779	3.92361	0.806657	3.75841	1.0852	0.37542	0.309399	6.75609	0.362612	1.37295	0.205591	P11966	sp|P11966|ODPB_BOVIN Pyruvate dehydrogenase E1 component subunit beta, mitochondrial OS=Bos taurus GN=PDHB PE=1 SV=2	2e-119
KH.C7.516.v1.A.nonSL11-1	42	151	136	74	42	33	174	73	72	29	2.69915	10.1419	8.05944	4.40295	2.65974	2.0974	10.2433	4.83078	4.93703	1.73341	3.75746	0.794666	0.54631	0.60408	4.8838	0.471604	1.022	0.351103	Q5VUM1	sp|Q5VUM1|CF057_HUMAN UPF0369 protein C6orf57 OS=Homo sapiens GN=C6orf57 PE=2 SV=1	3e-11
KH.C2.1000.v1.A.nonSL3-1	58	208	166	94	55	39	192	70	91	83	1.70195	6.37894	4.49175	2.55377	1.59035	1.13181	5.16099	2.11511	2.84916	2.26529	3.74802	0.704154	0.568547	0.622747	4.55994	0.409827	1.34705	0.795072	Q9DBW0	sp|Q9DBW0|CP4V2_MOUSE Cytochrome P450 4V2 OS=Mus musculus GN=Cyp4v2 PE=1 SV=1	9e-45
KH.C8.413.v1.A.nonSL5-1	31	111	115	162	191	24	142	131	158	190	1.33764	5.00572	4.57576	6.47183	8.12124	1.02419	5.61279	5.82057	7.27429	7.62529	3.7422	0.914108	1.41437	1.25486	5.48024	1.03702	1.24976	1.04825	P51572	sp|P51572|BAP31_HUMAN B-cell receptor-associated protein 31 OS=Homo sapiens GN=BCAP31 PE=1 SV=3	3e-21
KH.C4.677.v1.A.SL1-1	45	160	257	468	532	49	255	279	344	576	1.00633	3.7395	5.29967	9.68965	11.7233	1.08371	5.22372	6.42463	8.20808	11.9805	3.71598	1.41722	1.82835	1.20988	4.82022	1.22989	1.2776	1.4596	Q1KKV8	sp|Q1KKV8|MFSD5_TAKRU Major facilitator superfamily domain-containing protein 5 OS=Takifugu rubripes GN=mfsd5 PE=3 SV=1	1e-27
KH.L96.27.v1.A.SL2-1	173	614	853	615	361	221	609	344	241	385	4.38374	16.2605	19.9313	14.4281	9.01401	5.53836	14.1361	8.97582	6.51587	9.07372	3.70927	1.22575	0.72389	0.624754	2.55239	0.634958	0.725936	1.39256	P04899	sp|P04899|GNAI2_HUMAN Guanine nucleotide-binding protein G(i) subunit alpha-2 OS=Homo sapiens GN=GNAI2 PE=1 SV=3	2e-91
KH.C3.246.v1.A.SL2-1	312	1102	1293	765	398	231	1757	653	951	588	11.6728	43.0893	44.6077	26.4983	14.6729	8.54721	60.2153	25.1566	37.9629	20.4609	3.69142	1.03524	0.594031	0.55373	7.04502	0.417778	1.50906	0.538972	Q802F2	sp|Q802F2|SELTA_DANRE Selenoprotein T1a OS=Danio rerio GN=selt1a PE=2 SV=3	3e-25
KH.C14.272.v1.A.SL1-1	29	102	86	60	25	36	102	73	38	33	3.22827	11.8669	8.82794	6.18384	2.74236	3.96337	10.4012	8.36781	4.51348	3.41674	3.67594	0.743911	0.700486	0.443471	2.62434	0.804501	0.539387	0.757007	O94913	sp|O94913|PCF11_HUMAN Pre-mRNA cleavage complex 2 protein Pcf11 OS=Homo sapiens GN=PCF11 PE=1 SV=3	4e-09
KH.L87.20.v1.A.SL2-1	227	798	577	524	521	205	1351	448	486	586	5.29321	19.4474	12.4068	11.3125	11.9714	4.72757	28.8577	10.7569	12.0917	12.7092	3.67403	0.637963	0.911805	1.05824	6.10414	0.372757	1.12408	1.05107	Q8TCT9	sp|Q8TCT9|HM13_HUMAN Minor histocompatibility antigen H13 OS=Homo sapiens GN=HM13 PE=1 SV=1	2e-65
KH.C1.35.v1.A.SL2-1	502	1761	1384	808	391	333	1576	589	755	501	15.0723	55.2589	38.3179	22.4607	11.5682	9.88807	43.3457	18.21	24.1869	13.9907	3.66625	0.693425	0.586167	0.515041	4.38364	0.42011	1.32822	0.578443	Q3T0F5	sp|Q3T0F5|RAB7A_BOVIN Ras-related protein Rab-7a OS=Bos taurus GN=RAB7A PE=2 SV=1	1e-78
KH.C10.42.v1.A.SL1-1	281	984	1136	1146	466	216	1054	648	795	537	13.6749	50.047	50.9781	51.6341	22.3468	10.3959	46.9862	32.472	41.28	24.3062	3.65978	1.01861	1.01287	0.432791	4.5197	0.691095	1.27125	0.588812	Q9DB50	sp|Q9DB50|AP1S2_MOUSE AP-1 complex subunit sigma-2 OS=Mus musculus GN=Ap1s2 PE=2 SV=1	1e-53
KH.L142.16.v1.A.ND1-1	64	224	205	85	19	39	313	109	72	34	2.6578	9.722	7.85026	3.2681	0.777512	1.60176	11.9069	4.66106	3.19029	1.31325	3.65792	0.807474	0.416305	0.237909	7.43366	0.391459	0.684456	0.411639	O53472	sp|O53472|Y2026_MYCTU Universal stress protein Rv2026c/MT2085 OS=Mycobacterium tuberculosis GN=Rv2026c PE=2 SV=1	0.027
KH.C1.1110.v1.A.SL2-1	56	196	224	191	179	45	263	168	174	201	1.48287	5.42424	5.46957	4.68258	4.67069	1.17847	6.37948	4.58081	4.91611	4.95038	3.65792	1.00836	0.856114	0.997462	5.41335	0.718054	1.0732	1.00697	Q9M1W4	sp|Q9M1W4|HMT2_ARATH Homocysteine S-methyltransferase 2 OS=Arabidopsis thaliana GN=HMT-2 PE=1 SV=1	2e-19
KH.C10.430.v1.A.SL1-1	76	266	554	893	804	63	332	579	606	883	1.54757	5.66088	10.4024	16.8354	16.1326	1.26872	6.19281	12.1404	13.1663	16.7233	3.65792	1.8376	1.61841	0.958256	4.88113	1.9604	1.08451	1.27016	Q04791	sp|Q04791|SASB_ANAPL Fatty acyl-CoA hydrolase precursor, medium chain OS=Anas platyrhynchos PE=1 SV=1	4e-24
KH.C2.943.v2.A.SL1-1	226	790	847	446	366	132	904	390	362	373	9.50734	34.7331	32.8566	17.3708	15.172	5.4918	34.8363	16.894	16.2486	14.5944	3.6533	0.945973	0.528686	0.87342	6.34333	0.484953	0.961797	0.898193	P85971	sp|P85971|6PGL_RAT 6-phosphogluconolactonase OS=Rattus norvegicus GN=Pgls PE=1 SV=1	4e-28
KH.C2.534.v3.A.SL1-2	72	251	222	163	156	67	316	138	190	166	1.95805	7.13397	5.56715	4.10406	4.1805	1.80201	7.87212	3.86445	5.51317	4.1988	3.6434	0.780372	0.737193	1.01862	4.36853	0.490903	1.42664	0.761595	Q9UKJ5	sp|Q9UKJ5|CHIC2_HUMAN Cysteine-rich hydrophobic domain 2 protein OS=Homo sapiens GN=CHIC2 PE=1 SV=1	5e-29
KH.C4.577.v1.A.SL1-1	93	324	413	388	209	101	339	718	249	235	1.46916	5.34932	6.01625	5.67485	3.25346	1.57797	4.90569	11.6796	4.19704	3.45288	3.64106	1.12468	0.943253	0.573312	3.10886	2.38083	0.359347	0.822694	Q9P2K2	sp|Q9P2K2|TXD16_HUMAN Thioredoxin domain-containing protein 16 OS=Homo sapiens GN=TXNDC16 PE=2 SV=4	0.61
KH.C9.181.v1.R.ND1-1	62	216	164	85	37	44	252	82	81	48	1.85049	6.73774	4.51364	2.34881	1.0882	1.29879	6.88983	2.52014	2.5795	1.33248	3.64106	0.669904	0.520381	0.463297	5.30482	0.365777	1.02355	0.516566	B8FR31	sp|B8FR31|DXR_DESHD 1-deoxy-D-xylulose 5-phosphate reductoisomerase OS=Desulfitobacterium hafniense (strain DCB-2 / DSM 10664) GN=dxr PE=3 SV=1	0.96
KH.S391.4.v1.C.SL1-1	391	1361	1442	762	972	341	1510	624	553	987	12.5817	45.7707	42.7876	22.7015	30.8207	10.852	44.5096	20.6759	18.9865	29.5397	3.63787	0.934824	0.530562	1.35765	4.10152	0.464527	0.91829	1.55583	Q91YT2	sp|Q91YT2|RN185_MOUSE E3 ubiquitin-protein ligase RNF185 OS=Mus musculus GN=Rnf185 PE=2 SV=1	9e-23
KH.C7.402.v1.A.SL4-1	276	959	873	420	245	225	1248	430	362	325	8.65981	31.4473	25.2582	12.2007	7.5749	6.98188	35.8696	13.8926	12.1189	9.48437	3.63141	0.80319	0.483038	0.62086	5.13754	0.387309	0.872328	0.782608	Q91VC9	sp|Q91VC9|GHITM_MOUSE Growth hormone-inducible transmembrane protein OS=Mus musculus GN=Ghitm PE=2 SV=1	4e-49
KH.C9.534.v2.A.ND1-1	45	156	201	2572	1440	55	206	216	638	1744	0.797037	2.88773	3.28285	42.1766	25.1328	0.963427	3.34231	3.93946	12.0571	28.7302	3.62308	1.13683	12.8476	0.595893	3.46918	1.17866	3.0606	2.38284	P20305	sp|P20305|GELS_PIG Gelsolin (Fragment) OS=Sus scrofa GN=GSN PE=1 SV=1	4e-113
KH.C7.282.v1.C.SL2-1	223	772	895	473	204	120	821	368	426	255	23.3877	84.6186	86.5554	45.9281	21.0826	12.4467	78.8749	39.7418	47.6704	24.8742	3.61808	1.02289	0.530621	0.459035	6.33701	0.503858	1.1995	0.521795	O42123	sp|O42123|FKB1A_XENLA Peptidyl-prolyl cis-trans isomerase FKBP1A OS=Xenopus laevis GN=fkbp1a PE=3 SV=3	7e-11
KH.C6.109.v1.A.ND1-1	47	162	284	472	523	59	296	366	309	512	0.65001	2.34155	3.62184	6.04365	7.12748	0.806984	3.74997	5.21219	4.55971	6.58595	3.60233	1.54677	1.66867	1.17933	4.64689	1.38993	0.874816	1.44438	Q9P2C4	sp|Q9P2C4|TM181_HUMAN Transmembrane protein 181 OS=Homo sapiens GN=TMEM181 PE=1 SV=2	4e-57
KH.C12.375.v1.A.SL1-2	88	303	385	514	547	67	390	374	411	822	2.06154	7.41854	8.31686	11.1483	12.6273	1.5523	8.36927	9.02191	10.2733	17.9105	3.59854	1.12109	1.34044	1.13266	5.39154	1.07798	1.1387	1.74341	Q9D7W4	sp|Q9D7W4|TSN17_MOUSE Tetraspanin-17 OS=Mus musculus GN=Tspan17 PE=2 SV=1	1e-38
KH.C14.485.v1.A.SL1-1	43	148	400	342	178	53	197	250	191	179	1.33074	4.78689	11.415	9.79911	5.42822	1.62215	5.58476	7.96677	6.30689	5.15234	3.59716	2.38463	0.858445	0.55395	3.44281	1.42652	0.791649	0.816938	Q4R639	sp|Q4R639|DHSO_MACFA Sorbitol dehydrogenase OS=Macaca fascicularis GN=SORD PE=2 SV=3	5e-95
KH.C2.393.v1.A.nonSL12-1	68	234	255	104	59	42	278	99	99	69	1.85484	6.67081	6.41395	2.62643	1.58584	1.13302	6.94632	2.78067	2.8813	1.75054	3.59644	0.961495	0.409486	0.603803	6.13082	0.400308	1.03619	0.607552	P00508	sp|P00508|AATM_CHICK Aspartate aminotransferase, mitochondrial OS=Gallus gallus GN=GOT2 PE=1 SV=2	1e-131
KH.C2.393.v1.A.nonSL3-1	73	251	276	122	64	46	228	79	88	61	2.05557	7.3867	7.16652	3.18057	1.77583	1.28103	5.8811	2.29063	2.64393	1.59759	3.59349	0.970193	0.44381	0.558338	4.59092	0.38949	1.15424	0.60425	P00508	sp|P00508|AATM_CHICK Aspartate aminotransferase, mitochondrial OS=Gallus gallus GN=GOT2 PE=1 SV=2	4e-131
KH.C1.649.v1.A.SL2-1	64	220	259	142	63	41	337	109	146	85	5.05166	18.1486	18.8514	10.3771	4.90012	3.20058	24.3667	8.85927	12.296	6.24021	3.5926	1.03872	0.550472	0.472203	7.61323	0.36358	1.38792	0.5075	Q9CQ18	sp|Q9CQ18|RNH2C_MOUSE Ribonuclease H2 subunit C OS=Mus musculus GN=Rnaseh2c PE=1 SV=1	8e-06
KH.L23.6.v2.B.ND2-1	35	120	315	334	224	54	142	374	199	212	0.881951	3.16027	7.31941	7.79217	5.56207	1.34574	3.27777	9.70432	5.3504	4.96865	3.58327	2.31607	1.06459	0.713803	2.43566	2.96065	0.551342	0.928651	Q9HGM9	sp|Q9HGM9|DNJC7_SCHPO DnaJ homolog subfamily C member 7 homolog OS=Schizosaccharomyces pombe (strain 972 / ATCC 24843) GN=SPBC543.02c PE=4 SV=1	0.0003
KH.C13.13.v3.A.nonSL6-1	82	278	307	203	91	55	315	147	146	112	2.92995	10.3815	10.1152	6.7155	3.20406	1.94357	10.3103	5.40855	5.56617	3.72213	3.54321	0.974353	0.663902	0.477114	5.30482	0.524578	1.02914	0.668705	Q800K9	sp|Q800K9|SURF4_CHICK Surfeit locus protein 4 OS=Gallus gallus GN=SURF4 PE=2 SV=1	3e-47
KH.C4.727.v1.A.SL3-1	293	993	736	597	424	263	1335	429	451	469	5.98511	21.1992	13.8635	11.2905	8.53459	5.31314	24.9804	9.02358	9.82964	8.91053	3.54199	0.65396	0.81441	0.755907	4.70163	0.361227	1.08933	0.906496	Q2TJ56	sp|Q2TJ56|VATA_AEDAL V-type proton ATPase catalytic subunit A OS=Aedes albopictus GN=VhaA PE=2 SV=1	0
KH.C14.132.v2.A.nonSL5-1	36	122	111	56	45	40	156	38	53	60	1.35582	4.80205	3.85489	1.95265	1.67003	1.48988	5.38194	1.47367	2.12977	2.10173	3.5418	0.80276	0.506537	0.855266	3.61233	0.273818	1.44521	0.986836	Q9CY57	sp|Q9CY57|CHTOP_MOUSE Chromatin target of PRMT1 protein OS=Mus musculus GN=Chtop PE=1 SV=2	3e-06
KH.C7.425.v1.A.SL1-1	31	105	172	196	238	30	137	131	182	337	1.22026	4.31963	6.24321	7.14303	9.23166	1.16789	4.93997	5.30981	7.64397	12.3381	3.53992	1.44531	1.14413	1.2924	4.22982	1.07487	1.43959	1.61409	Q1JQ66	sp|Q1JQ66|S35E3_DANRE Solute carrier family 35 member E3 OS=Danio rerio GN=slc35e3 PE=2 SV=1	3e-32
KH.L124.17.v2.A.SL1-2	84	283	299	179	212	59	306	161	142	232	2.82539	9.94836	9.27382	5.57426	7.02662	1.96264	9.4283	5.57624	5.09616	7.25793	3.52106	0.932196	0.601074	1.26055	4.80388	0.591436	0.913907	1.42419	B2WB15	sp|B2WB15|RTC5_PYRTR Restriction of telomere capping protein 5 OS=Pyrenophora tritici-repentis (strain Pt-1C-BFP) GN=rtc5 PE=3 SV=1	4.1
KH.C1.892.v1.A.SL2-1	33	111	212	186	198	20	126	75	178	230	1.88067	6.61132	11.141	9.81403	11.1193	1.12725	6.57783	4.40126	10.8237	12.1914	3.5154	1.68514	0.880894	1.133	5.8353	0.669105	2.45922	1.12636	Q6AXW7	sp|Q6AXW7|DUS18_RAT Dual specificity protein phosphatase 18 OS=Rattus norvegicus GN=Dusp18 PE=2 SV=1	1e-25
KH.C12.588.v1.A.SL1-1	59	198	323	569	715	67	298	327	491	876	1.66861	5.85242	8.42355	14.8988	19.9261	1.874	7.72028	9.52288	14.8164	23.0427	3.50735	1.43933	1.76871	1.33743	4.11969	1.23349	1.55587	1.55522	Q08C93	sp|Q08C93|ABD12_DANRE Monoacylglycerol lipase ABHD12 OS=Danio rerio GN=abhd12 PE=2 SV=1	1e-23
KH.C1.552.v1.A.SL1-1	163	547	687	654	777	107	958	559	563	794	4.52793	15.8806	17.5978	16.82	21.2689	2.93959	24.3776	15.9897	16.687	20.5144	3.50724	1.10813	0.955801	1.2645	8.29286	0.655919	1.0436	1.22937	Q8VDN4	sp|Q8VDN4|CCD92_MOUSE Coiled-coil domain-containing protein 92 OS=Mus musculus GN=Ccdc92 PE=2 SV=1	4e-14
KH.C1.216.v11.A.SL1-1	211	707	615	279	80	125	759	269	341	139	9.51224	33.3109	25.5661	11.645	3.55388	5.57315	31.3441	12.4873	16.4025	5.82829	3.50189	0.7675	0.455486	0.305185	5.62412	0.398395	1.31353	0.355328	P17209	sp|P17209|MYL4_RAT Myosin light chain 4 OS=Rattus norvegicus GN=Myl4 PE=2 SV=2	5e-37
KH.C7.432.v1.A.SL1-1	89	297	302	171	206	75	359	139	213	231	4.53071	15.8015	14.1766	8.05949	10.3337	3.77597	16.7411	7.28632	11.5694	10.9374	3.48765	0.897167	0.568507	1.28218	4.43359	0.435235	1.58783	0.94537	A7MSW0	sp|A7MSW0|HFLD_VIBHB High frequency lysogenization protein HflD homolog OS=Vibrio harveyi (strain ATCC BAA-1116 / BB120) GN=hflD PE=3 SV=1	1.6
KH.C1.287.v1.A.nonSL4-1	447	1486	1331	922	1031	364	1666	718	738	1049	10.4071	36.1583	28.5753	19.8742	23.6534	8.38138	35.5313	17.2133	18.3331	22.7156	3.47438	0.790282	0.695503	1.19016	4.23932	0.484455	1.06505	1.23905	Q5RKI1	sp|Q5RKI1|IF4A2_RAT Eukaryotic initiation factor 4A-II OS=Rattus norvegicus GN=Eif4a2 PE=1 SV=1	7e-135
KH.C1.1249.v1.A.ND1-1	87	289	452	499	334	91	285	285	357	281	2.1192	7.35728	10.1527	11.2535	8.017	2.19223	6.35933	7.1485	9.2785	6.36628	3.47172	1.37995	1.10843	0.712398	2.90086	1.1241	1.29796	0.686132	Q80TA1	sp|Q80TA1|EPT1_MOUSE Ethanolaminephosphotransferase 1 OS=Mus musculus GN=Ept1 PE=2 SV=3	5e-40
KH.L124.15.v1.A.SL6-1	81	269	313	181	136	64	351	170	126	151	2.776	9.63504	9.89163	5.74313	4.59289	2.16923	11.0193	5.9993	4.60746	4.81324	3.47083	1.02663	0.580605	0.799718	5.07984	0.544434	0.768	1.04466	Q9DBH5	sp|Q9DBH5|LMAN2_MOUSE Vesicular integral-membrane protein VIP36 OS=Mus musculus GN=Lman2 PE=2 SV=2	3e-49
KH.C11.386.v1.A.SL1-1	218	723	963	939	1515	215	822	623	627	1480	4.3377	15.0351	17.6693	17.2983	29.7049	4.23089	14.9826	12.7646	13.3115	27.3899	3.46615	1.1752	0.979007	1.71721	3.54125	0.851961	1.04284	2.05761	Q04833	sp|Q04833|LRP_CAEEL Low-density lipoprotein receptor-related protein OS=Caenorhabditis elegans GN=lrp-1 PE=1 SV=1	0.0002
KH.C10.400.v1.A.SL1-1	424	1402	1707	1147	819	302	1436	1006	833	907	10.738	37.1082	39.8638	26.8939	20.4386	7.56403	33.3138	26.2344	22.5091	21.3643	3.4558	1.07426	0.674647	0.759971	4.40423	0.787494	0.857998	0.949144	Q8K021	sp|Q8K021|SCAM1_MOUSE Secretory carrier-associated membrane protein 1 OS=Mus musculus GN=Scamp1 PE=1 SV=1	1e-28
KH.C8.75.v1.A.SL1-1	217	717	565	241	104	162	748	252	247	157	13.8865	47.9533	33.3404	14.2786	6.5581	10.2527	43.8478	16.6054	16.865	9.34456	3.45323	0.695267	0.428267	0.459296	4.27671	0.378706	1.01563	0.55408	Q9D081	sp|Q9D081|ALG14_MOUSE UDP-N-acetylglucosamine transferase subunit ALG14 homolog OS=Mus musculus GN=Alg14 PE=2 SV=1	5e-33
KH.L96.42.v1.A.SL2-1	198	654	537	529	370	137	1112	425	564	381	8.1331	28.076	20.3401	20.1179	14.9763	5.56547	41.8416	17.9761	24.7187	14.556	3.45206	0.724468	0.989072	0.744428	7.51808	0.429623	1.37509	0.588865	Q5ZIK9	sp|Q5ZIK9|COPE_CHICK Coatomer subunit epsilon OS=Gallus gallus GN=COPE PE=2 SV=1	1e-74
KH.C5.664.v1.A.nonSL4-1	37	122	128	85	40	32	227	87	69	48	1.56523	5.3939	4.99316	3.32913	1.66743	1.3388	8.79662	3.78977	3.11446	1.88862	3.44607	0.925705	0.666738	0.500862	6.5705	0.430821	0.821806	0.606404	Q9Z2X2	sp|Q9Z2X2|PSD10_MOUSE 26S proteasome non-ATPase regulatory subunit 10 OS=Mus musculus GN=Psmd10 PE=1 SV=3	7e-32
KH.C4.495.v1.A.SL1-1	34	112	137	68	70	21	141	57	71	66	1.1591	3.99048	4.30676	2.14628	2.35153	0.708029	4.40325	2.00094	2.58259	2.09272	3.44275	1.07926	0.49835	1.09563	6.21903	0.454422	1.29069	0.810317	B6YWH0	sp|B6YWH0|GYAR_THEON Glyoxylate reductase OS=Thermococcus onnurineus (strain NA1) GN=gyaR PE=3 SV=1	2e-23
KH.C10.21.v1.A.SL1-1	85	280	305	333	331	76	401	251	316	397	2.81513	9.6918	9.3147	10.2108	10.8024	2.48934	12.1657	8.55994	11.1667	12.2292	3.44275	0.961091	1.0962	1.05794	4.88713	0.703612	1.30453	1.09515	Q5RC14	sp|Q5RC14|CK049_PONAB UPF0705 protein C11orf49 homolog OS=Pongo abelii PE=2 SV=1	5e-32
KH.C5.322.v1.A.SL2-1	256	839	784	553	422	248	1237	503	386	367	4.24547	14.5417	11.9892	8.49075	6.8962	4.0675	18.7918	8.58955	6.83013	5.6608	3.42522	0.824474	0.708199	0.812202	4.61999	0.45709	0.795168	0.828797	Q9SGZ5	sp|Q9SGZ5|BXL7_ARATH Probable beta-D-xylosidase 7 OS=Arabidopsis thaliana GN=BXL7 PE=2 SV=2	7e-26
KH.C5.193.v1.A.SL2-1	47	154	163	85	74	27	178	63	66	60	3.05077	10.4471	9.75635	5.10817	4.7332	1.73327	10.5839	4.21084	4.571	3.62233	3.42444	0.933877	0.523574	0.926594	6.10631	0.397854	1.08553	0.792459	Q20591	sp|Q20591|VA0E_CAEEL V-type proton ATPase subunit e OS=Caenorhabditis elegans GN=vha-17 PE=3 SV=2	1e-10
KH.C3.179.v1.A.SL1-1	474	1553	1566	1109	623	282	1841	695	997	770	19.9959	68.4699	60.9176	43.314	25.8977	11.7653	71.1425	30.19	44.8759	30.2119	3.4242	0.889699	0.711027	0.597906	6.04683	0.42436	1.48645	0.673233	Q21735	sp|Q21735|NTF2_CAEEL Probable nuclear transport factor 2 OS=Caenorhabditis elegans GN=ran-4 PE=3 SV=1	1e-12
KH.C1.703.v1.A.SL1-1	74	242	338	334	378	53	350	244	404	402	3.05348	10.4363	12.8608	12.7599	15.3698	2.16287	13.2296	10.3674	17.787	15.4282	3.41782	1.23232	0.992147	1.20454	6.11667	0.783656	1.71566	0.86739	Q8CFV9	sp|Q8CFV9|RIFK_MOUSE Riboflavin kinase OS=Mus musculus GN=Rfk PE=1 SV=2	7e-39
KH.C2.881.v1.A.ND1-1	95	310	493	643	1017	72	358	376	410	860	1.67152	5.70055	7.9988	10.4745	17.6328	1.25289	5.77013	6.8123	7.69714	14.0739	3.41039	1.40316	1.30951	1.6834	4.60546	1.18062	1.12989	1.82845	Q8BHK3	sp|Q8BHK3|S36A2_MOUSE Proton-coupled amino acid transporter 2 OS=Mus musculus GN=Slc36a2 PE=1 SV=1	0.0001
KH.S1140.1.v1.A.SL1-1	124	404	530	703	897	90	528	408	610	1044	3.12811	10.6514	12.3289	16.4191	22.2979	2.2454	12.2013	10.5983	16.419	24.4955	3.40507	1.15749	1.33176	1.35804	5.43393	0.86862	1.54921	1.4919	P35803	sp|P35803|GPM6B_MOUSE Neuronal membrane glycoprotein M6-b OS=Mus musculus GN=Gpm6b PE=1 SV=2	5e-21
KH.C8.67.v1.A.SL2-1	51	166	167	194	197	34	204	157	186	234	1.4496	4.9312	4.37707	5.10523	5.51768	0.955757	5.31155	4.59509	5.64089	6.18614	3.40176	0.887628	1.16636	1.08079	5.55743	0.865114	1.22759	1.09666	P87379	sp|P87379|GRB2A_XENLA Growth factor receptor-bound protein 2-A OS=Xenopus laevis GN=grb2-a PE=1 SV=2	1e-50
KH.L41.77.v1.A.SL1-1	52	169	187	123	80	45	314	144	176	97	2.71425	9.21933	9.00071	5.94411	4.1148	2.323	15.0138	7.73973	9.80202	4.70917	3.39664	0.976287	0.660404	0.692248	6.46309	0.515509	1.26645	0.480428	Q2TBG7	sp|Q2TBG7|ISCA2_BOVIN Iron-sulfur cluster assembly 2 homolog, mitochondrial OS=Bos taurus GN=ISCA2 PE=2 SV=1	4e-18
KH.L125.1.v1.A.ND2-1	40	130	175	137	123	36	149	92	93	104	1.17224	3.98168	4.72916	3.71717	3.55201	1.0434	3.99997	2.77627	2.90801	2.83476	3.39664	1.18773	0.786012	0.955567	3.8336	0.694073	1.04745	0.97481	Q29R99	sp|Q29R99|LIPT2_DANRE Putative lipoyltransferase 2, mitochondrial OS=Danio rerio GN=lipt2 PE=2 SV=1	3e-38
KH.C2.69.v3.A.SL1-2	53	172	183	89	189	40	140	63	76	164	1.01792	3.45249	3.24099	1.58257	3.57694	0.759782	2.46309	1.24594	1.55743	2.9296	3.39171	0.93874	0.488298	2.26021	3.24183	0.505843	1.25001	1.88105	Q6RZ07	sp|Q6RZ07|MIP_CAVPO Lens fiber major intrinsic protein OS=Cavia porcellus GN=MIP PE=1 SV=1	1e-10
KH.C6.268.v1.A.SL1-1	41	133	138	174	135	56	276	253	121	125	1.09463	3.7111	3.39744	4.30099	3.55165	1.47864	6.75005	6.9554	3.44688	3.10399	3.39027	0.915483	1.26595	0.825774	4.56503	1.03042	0.495569	0.900522	E1C7T6	sp|E1C7T6|TYW5_CHICK tRNA wybutosine-synthesizing protein 5 OS=Gallus gallus GN=TYW5 PE=3 SV=1	0.007
KH.C4.565.v1.A.SL2-1	107	347	475	549	411	101	509	358	555	421	4.56914	15.4863	18.7039	21.7049	17.2944	4.26543	19.9105	15.7417	25.2872	16.7209	3.38931	1.20778	1.16045	0.796794	4.66787	0.790622	1.60638	0.661239	Q0VFV6	sp|Q0VFV6|SELS_DANRE Selenoprotein S OS=Danio rerio GN=vimp PE=2 SV=2	0.0001
KH.C1.266.v1.A.SL1-1	91	295	476	442	280	89	705	779	334	236	1.6413	5.56077	7.91667	7.38081	4.97642	1.58755	11.6479	14.4677	6.42761	3.95899	3.38803	1.42366	0.932313	0.674237	7.33706	1.24209	0.444272	0.615935	Q8IWF2	sp|Q8IWF2|FXRD2_HUMAN FAD-dependent oxidoreductase domain-containing protein 2 OS=Homo sapiens GN=FOXRED2 PE=1 SV=1	8e-89
KH.C3.580.v1.A.SL1-1	47	152	217	306	258	27	180	209	259	318	0.91628	3.09699	3.90102	5.52315	4.95635	0.520576	3.21452	4.19559	5.38749	5.76611	3.37996	1.25962	1.41582	0.897377	6.17492	1.3052	1.28408	1.07028
KH.C14.5.v3.A.SL3-1	58	187	155	122	73	37	213	100	76	100	2.12606	7.164	5.23924	4.14041	2.63683	1.34134	7.15222	3.77455	2.97247	3.40937	3.36961	0.731329	0.790268	0.636854	5.33213	0.527745	0.787505	1.14698	Q08DK4	sp|Q08DK4|GHC1_BOVIN Mitochondrial glutamate carrier 1 OS=Bos taurus GN=SLC25A22 PE=2 SV=1	9e-33
KH.C2.983.v1.A.ND1-1	71	228	252	194	53	58	293	166	166	69	2.74471	9.2117	8.98314	6.94345	2.01895	2.21747	10.3758	6.6079	6.84704	2.48093	3.35616	0.975188	0.772943	0.290771	4.6791	0.63686	1.03619	0.362335	Q8SPU8	sp|Q8SPU8|DHRS4_BOVIN Dehydrogenase/reductase SDR family member 4 OS=Bos taurus GN=DHRS4 PE=2 SV=2	2e-47
KH.C11.479.v1.A.SL3-1	205	658	646	440	308	185	838	286	321	342	6.74017	22.6104	19.5857	13.3938	9.97883	6.0156	25.2391	9.68278	11.261	10.4585	3.35458	0.866222	0.683859	0.745032	4.19561	0.383642	1.163	0.928733	A9C3P0	sp|A9C3P0|MLEC_DANRE Malectin OS=Danio rerio GN=mlec PE=3 SV=1	6e-38
KH.L18.108.v1.A.ND1-1	121	388	497	394	255	69	299	267	253	279	5.96535	19.9917	22.5941	17.9838	12.388	3.36427	13.5032	13.5544	13.3085	12.7933	3.35129	1.13018	0.795951	0.688844	4.0137	1.00379	0.981858	0.961287	Q5M8T2	sp|Q5M8T2|S35D3_HUMAN Solute carrier family 35 member D3 OS=Homo sapiens GN=SLC35D3 PE=2 SV=1	0.041
KH.C14.343.v1.A.nonSL2-1	44	141	174	159	203	27	246	134	170	284	1.54416	5.17161	5.6309	5.16621	7.02018	0.937118	7.9084	4.84241	6.36569	9.2701	3.34913	1.08881	0.917475	1.35886	8.43906	0.612313	1.31457	1.45626	Q9BVK2	sp|Q9BVK2|ALG8_HUMAN Probable dolichyl pyrophosphate Glc1Man9GlcNAc2 alpha-1,3-glucosyltransferase OS=Homo sapiens GN=ALG8 PE=1 SV=2	2e-48
KH.C13.125.v1.A.SL2-1	54	173	205	166	139	47	214	134	161	149	1.62348	5.43582	5.68324	4.62058	4.11794	1.39747	5.89359	4.14834	5.16458	4.16644	3.34825	1.04552	0.813019	0.891217	4.21734	0.703874	1.24497	0.806733	Q9CPU9	sp|Q9CPU9|COPT2_MOUSE Probable low affinity copper uptake protein 2 OS=Mus musculus GN=Slc31a2 PE=1 SV=1	4e-05
KH.L154.6.v1.A.SL1-1	59	189	213	201	148	29	587	276	113	111	1.97133	6.59986	6.56259	6.21782	4.87282	0.958286	17.9663	9.49582	4.02848	3.4495	3.34793	0.994353	0.947464	0.783687	18.7483	0.528536	0.424237	0.856277	P13993	sp|P13993|PRP2_SOYBN Repetitive proline-rich cell wall protein 2 OS=Glycine max GN=PRP2 PE=2 SV=1	0.001
KH.L9.3.v2.A.SL1-2	134	429	576	431	573	115	498	370	363	590	6.62067	22.1524	26.2427	19.7156	27.8974	5.61934	22.5393	18.8242	19.1364	27.1128	3.34594	1.18464	0.751279	1.41499	4.01101	0.835172	1.01659	1.41682	Q17R06	sp|Q17R06|RAB21_BOVIN Ras-related protein Rab-21 OS=Bos taurus GN=RAB21 PE=2 SV=1	5e-68
KH.C1.1262.v1.A.SL1-1	45	144	396	620	356	34	283	501	450	393	0.963525	3.2224	7.8187	12.2907	7.51126	0.719979	5.55073	11.046	10.2806	7.82653	3.34438	2.42636	1.57197	0.611132	7.70957	1.99001	0.93071	0.761289	Q6GNV7	sp|Q6GNV7|DIRC2_XENLA Disrupted in renal carcinoma protein 2 homolog OS=Xenopus laevis GN=dirc2 PE=2 SV=1	2e-21
KH.C14.460.v1.A.SL1-1	43	137	128	94	39	36	206	65	76	60	2.50091	8.32752	6.8648	5.06165	2.23514	2.07072	10.9751	3.89277	4.71627	3.24568	3.3298	0.824351	0.737334	0.441584	5.30014	0.354691	1.21155	0.688188	Q3T0W7	sp|Q3T0W7|ATG12_BOVIN Ubiquitin-like protein ATG12 OS=Bos taurus GN=ATG12 PE=2 SV=1	4e-21
KH.C1.421.v1.A.nonSL3-1	108	344	387	217	119	86	247	189	81	133	2.31574	7.70888	7.65185	4.30786	2.51435	1.82371	4.85151	4.17297	1.85314	2.65243	3.3289	0.992602	0.562983	0.583665	2.66024	0.860139	0.444082	1.43132	P61922	sp|P61922|GABT_MOUSE 4-aminobutyrate aminotransferase, mitochondrial OS=Mus musculus GN=Abat PE=1 SV=1	3e-76
KH.L116.86.v1.A.SL1-1	38	121	104	124	112	25	193	94	131	133	1.16961	3.89233	2.95176	3.53358	3.39694	0.761008	5.44163	2.97922	4.30216	3.80747	3.32788	0.758352	1.19711	0.961331	7.15056	0.547487	1.44405	0.885014	Q4V7Q8	sp|Q4V7Q8|TM220_XENLA Transmembrane protein 220 OS=Xenopus laevis GN=tmem220 PE=2 SV=1	1e-08
KH.L141.73.v1.A.ND1-1	34	108	98	17	0	13	161	24	10	2	4.76917	15.8327	12.6759	2.20774	0	1.80342	20.6873	3.46651	1.49665	0.260927	3.31979	0.800617	0.174168	0	11.4711	0.167567	0.431746	0.174341	Q8ZD91	sp|Q8ZD91|GTPC1_YERPE Putative GTP cyclohydrolase 1 type 2 OS=Yersinia pestis GN=YPO2697 PE=3 SV=2	3.1
KH.L71.9.v1.A.SL1-1	47	149	176	62	28	41	208	91	46	32	0.810595	2.68571	2.79903	0.989995	0.475857	0.699327	3.28612	1.61609	0.846487	0.513313	3.31325	1.0422	0.353692	0.480666	4.69897	0.491792	0.523788	0.606404	Q9PW70	sp|Q9PW70|CISH_CHICK Cytokine-inducible SH2-containing protein OS=Gallus gallus GN=CISH PE=2 SV=1	4e-09
KH.C2.66.v2.A.SL1-1	36	114	158	168	112	19	100	94	172	134	1.02453	3.39074	4.14638	4.42657	3.14089	0.53477	2.60697	2.75466	5.22286	3.54694	3.30955	1.22285	1.06758	0.709554	4.87494	1.05665	1.89601	0.679119	Q8BH16	sp|Q8BH16|FBXL2_MOUSE F-box/LRR-repeat protein 2 OS=Mus musculus GN=Fbxl2 PE=1 SV=1	9e-08
KH.C2.812.v1.A.nonSL3-1	78	246	193	101	53	43	217	79	64	68	3.12187	10.2901	7.12305	3.74263	2.0903	1.70208	7.95596	3.25585	2.7331	2.53136	3.29615	0.692221	0.525425	0.55851	4.67427	0.409233	0.839445	0.926187	Q5R4K6	sp|Q5R4K6|PKHB2_PONAB Pleckstrin homology domain-containing family B member 2 OS=Pongo abelii GN=PLEKHB2 PE=2 SV=1	7e-12
KH.C3.323.v1.A.SL1-1	73	230	271	423	367	60	325	307	467	479	2.83899	9.34834	9.71848	15.2306	14.0643	2.30771	11.5781	12.2941	19.3782	17.3261	3.29284	1.03959	1.56717	0.923427	5.01712	1.06184	1.57622	0.894104	Q502L2	sp|Q502L2|PGAM5_DANRE Serine/threonine-protein phosphatase PGAM5, mitochondrial OS=Danio rerio GN=pgam5 PE=2 SV=2	4e-46
KH.L55.6.v1.B.SL2-1	63	198	171	140	114	47	289	137	134	133	4.40486	14.4685	11.0249	9.06264	7.85431	3.24997	18.5098	9.86345	9.9966	8.64906	3.28466	0.761997	0.822012	0.86667	5.69538	0.532876	1.0135	0.8652	Q14DQ1	sp|Q14DQ1|F219B_MOUSE Protein FAM219B OS=Mus musculus GN=Fam219b PE=2 SV=1	2e-05
KH.C12.621.v1.A.ND1-1	108	339	352	225	199	61	342	156	167	225	3.99442	13.1038	12.005	7.70456	7.25263	2.23126	11.587	5.94117	6.59027	7.73996	3.28052	0.916148	0.64178	0.941342	5.19301	0.512746	1.10925	1.17445	Q8K2C6	sp|Q8K2C6|SIR5_MOUSE NAD-dependent protein deacylase sirtuin-5, mitochondrial OS=Mus musculus GN=Sirt5 PE=1 SV=1	2e-73
KH.C11.167.v1.A.SL3-1	108	338	385	155	111	85	467	144	149	100	4.26234	13.9414	14.0112	5.66358	4.31677	3.31767	16.8832	5.85199	6.27433	3.67071	3.27084	1.005	0.40422	0.762198	5.08886	0.346617	1.07217	0.585037	A1L157	sp|A1L157|TSN11_HUMAN Tetraspanin-11 OS=Homo sapiens GN=TSPAN11 PE=2 SV=2	4e-24
KH.C12.89.v1.A.SL2-1	34	106	144	204	157	20	149	128	164	193	1.02628	3.34393	4.00808	5.701	4.66979	0.597044	4.11988	3.97844	5.28185	5.41837	3.25832	1.19861	1.42237	0.819118	6.90048	0.965667	1.32762	1.02585	Q6TLE6	sp|Q6TLE6|CRCM1_DANRE Calcium release-activated calcium channel protein 1 OS=Danio rerio GN=orai1 PE=2 SV=2	1e-35
KH.L5.15.v3.A.SL1-1	45	140	199	128	48	34	155	106	133	76	2.34617	7.62853	9.56728	6.17862	2.46604	1.75314	7.40272	5.69075	7.39868	3.68541	3.25148	1.25414	0.645808	0.399124	4.22256	0.768737	1.30013	0.498117	Q63619	sp|Q63619|COQ7_RAT Ubiquinone biosynthesis protein COQ7 homolog (Fragment) OS=Rattus norvegicus GN=Coq7 PE=2 SV=3	7e-50
KH.C14.15.v1.A.SL2-1	58	180	264	246	150	47	240	152	237	195	2.13991	6.94075	8.98174	8.40307	5.45345	1.71497	8.11134	5.77469	9.32981	6.69158	3.24348	1.29406	0.935573	0.648982	4.72973	0.711928	1.61564	0.717226	Q3L8U1	sp|Q3L8U1|CHD9_HUMAN Chromodomain-helicase-DNA-binding protein 9 OS=Homo sapiens GN=CHD9 PE=1 SV=2	3.9
KH.L18.107.v1.A.ND1-1	515	1597	1731	1313	295	281	1754	727	836	407	31.1109	100.827	96.4253	73.4353	17.5606	16.7881	97.0617	45.2227	53.885	22.8679	3.24089	0.956345	0.761577	0.23913	5.78157	0.465917	1.19155	0.424383	Q07984	sp|Q07984|SSRD_RAT Translocon-associated protein subunit delta OS=Rattus norvegicus GN=Ssr4 PE=2 SV=1	2e-16
KH.C9.440.v1.A.SL1-1	265	820	864	743	371	385	1245	543	259	137	2.87854	9.30907	8.65423	7.47223	3.97111	4.13597	12.3882	6.07355	3.0018	1.38412	3.23396	0.929656	0.863419	0.531449	2.99524	0.490269	0.494242	0.461095	Q04913	sp|Q04913|NR4A1_XENLA Nuclear receptor subfamily 4 group A member 1 OS=Xenopus laevis GN=nr4a1 PE=2 SV=1	8e-60
KH.C12.398.v1.R.ND1-1	33	102	183	112	153	39	127	78	100	117	0.673181	2.17462	3.44237	2.1153	3.07554	0.786815	2.3732	1.63843	2.17658	2.21988	3.23037	1.58297	0.614488	1.45395	3.01621	0.69039	1.32845	1.0199	B0JZG0	sp|B0JZG0|S23A2_XENTR Solute carrier family 23 member 2 OS=Xenopus tropicalis GN=slc23a2 PE=2 SV=1	2e-82
KH.S583.6.v1.A.ND1-1	278	857	1012	484	288	214	885	521	376	266	7.4573	24.0261	25.0326	12.0204	7.61274	5.67729	21.7467	14.391	10.7617	6.63658	3.22183	1.04189	0.480188	0.633321	3.83047	0.661756	0.747807	0.616685	Q8C3L1	sp|Q8C3L1|SSUH2_MOUSE Protein SSUH2 homolog OS=Mus musculus GN=Ssuh2 PE=2 SV=1	8e-20
KH.C14.405.v1.A.SL2-1	266	820	746	438	319	163	1147	317	489	307	15.236	49.0874	39.4019	23.2273	18.005	9.23353	60.182	18.6967	29.8851	16.3551	3.2218	0.80269	0.589497	0.775164	6.51776	0.31067	1.59841	0.547267	Q9UBQ5	sp|Q9UBQ5|EIF3K_HUMAN Eukaryotic translation initiation factor 3 subunit K OS=Homo sapiens GN=EIF3K PE=1 SV=1	4e-37
KH.L170.5.v1.A.ND1-1	41	126	191	247	338	28	149	140	219	391	1.91702	6.15714	8.23502	10.6924	15.573	1.29477	6.38178	6.74043	10.9255	17.0038	3.21183	1.33747	1.2984	1.45645	4.92891	1.0562	1.6209	1.55633	A5D6V4	sp|A5D6V4|TM17B_DANRE Transmembrane protein 17B OS=Danio rerio GN=Tmem17b PE=2 SV=1	2e-16
KH.C12.283.v1.A.nonSL14-1	34	104	97	91	66	27	121	59	70	97	1.85149	5.91892	4.87084	4.58796	3.54159	1.45411	6.03589	3.30835	4.06722	4.91293	3.19684	0.822926	0.941924	0.771932	4.15092	0.548113	1.22938	1.20793	Q6J3Q7	sp|Q6J3Q7|COX17_CANFA Cytochrome c oxidase copper chaperone OS=Canis familiaris GN=COX17 PE=3 SV=3	3e-11
KH.S916.1.v2.A.SL1-1	90	275	277	343	268	67	291	232	264	293	2.88989	9.22865	8.20178	10.1969	8.47981	2.12767	8.55944	7.67086	9.04481	8.7505	3.19342	0.88873	1.24326	0.831606	4.02292	0.896187	1.17911	0.967461	Q5QJU3	sp|Q5QJU3|ACER2_HUMAN Alkaline ceramidase 2 OS=Homo sapiens GN=ACER2 PE=1 SV=2	3e-40
KH.C3.66.v1.A.SL2-1	46	140	174	165	134	35	243	132	194	184	2.65494	8.44483	9.26051	8.8169	7.62103	1.99781	12.8474	7.8449	11.9469	9.87735	3.1808	1.09659	0.952097	0.864366	6.43074	0.61062	1.52289	0.826772	Q9GLN5	sp|Q9GLN5|BIRC5_PIG Baculoviral IAP repeat-containing protein 5 OS=Sus scrofa GN=BIRC5 PE=2 SV=1	3e-13
KH.S702.1.v1.A.ND1-1	47	143	113	120	177	39	156	72	108	173	1.07602	3.42155	2.38555	2.54353	3.99306	0.88303	3.27159	1.69734	2.63816	3.68377	3.17983	0.697212	1.06623	1.56989	3.70495	0.518814	1.55429	1.39634	Q5EA65	sp|Q5EA65|GPT_BOVIN UDP-N-acetylglucosamine--dolichyl-phosphate N-acetylglucosaminephosphotransferase OS=Bos taurus GN=DPAGT1 PE=2 SV=1	5e-66
KH.C14.11.v1.A.ND1-1	89	270	285	388	409	55	287	208	377	496	3.71301	11.7724	10.964	14.9866	16.814	2.26929	10.9681	8.93545	16.7816	19.2462	3.17059	0.93133	1.36689	1.12194	4.83328	0.814676	1.87809	1.14686	Q5I0K7	sp|Q5I0K7|ALG13_RAT UDP-N-acetylglucosamine transferase subunit ALG13 homolog OS=Rattus norvegicus GN=Alg13 PE=1 SV=1	9e-24
KH.C2.335.v1.R.ND2-1	104	315	276	105	48	71	364	120	108	57	3.98979	12.6297	9.7637	3.72942	1.81455	2.6938	12.7918	4.74039	4.42076	2.03384	3.16551	0.773074	0.381968	0.486551	4.7486	0.370581	0.932571	0.460067	Q07326	sp|Q07326|PIGF_HUMAN Phosphatidylinositol-glycan biosynthesis class F protein OS=Homo sapiens GN=PIGF PE=1 SV=1	7e-06
KH.L71.14.v1.A.SL1-1	228	690	681	257	129	130	865	285	247	140	14.6111	46.2128	40.2423	15.2481	8.14608	8.23912	50.7781	18.8065	16.8889	8.34451	3.16286	0.870804	0.378907	0.534236	6.16305	0.370367	0.898032	0.494084	Q502J7	sp|Q502J7|DCTN6_DANRE Dynactin subunit 6 OS=Danio rerio GN=dctn6 PE=2 SV=1	5e-24
KH.C10.250.v3.A.SL1-2	43	130	141	141	201	39	131	123	137	158	0.879551	2.77909	2.6595	2.67022	4.05136	0.788947	2.45458	2.59068	2.98999	3.00591	3.15967	0.95697	1.00403	1.51724	3.11121	1.05545	1.15413	1.00532	Q642J5	sp|Q642J5|RFOX1_DANRE RNA binding protein fox-1 homolog 1 OS=Danio rerio GN=rbfox1 PE=2 SV=1	2e-33
KH.C5.415.v1.R.ND1-1	60	181	200	91	34	41	261	91	79	19	1.99737	6.29728	6.13941	2.80469	1.11532	1.34984	7.95906	3.11937	2.80603	0.588285	3.15278	0.974931	0.456833	0.397662	5.8963	0.391926	0.89955	0.209651	P11966	sp|P11966|ODPB_BOVIN Pyruvate dehydrogenase E1 component subunit beta, mitochondrial OS=Bos taurus GN=PDHB PE=1 SV=2	1e-123
KH.L152.20.v1.A.ND1-1	115	346	490	483	704	116	384	319	364	710	3.08668	9.70591	12.1277	12.0026	18.6199	3.07923	9.44144	8.81661	10.4244	17.7247	3.14445	1.24952	0.989686	1.55132	3.06617	0.93382	1.18236	1.7003	Q7ZW46	sp|Q7ZW46|S35B4_DANRE UDP-xylose and UDP-N-acetylglucosamine transporter OS=Danio rerio GN=slc35b4 PE=2 SV=1	2e-40
KH.C7.57.v1.A.ND1-1	179	538	737	644	595	142	639	521	622	646	4.31841	13.565	16.3956	14.3844	14.1449	3.38805	14.1216	12.9427	16.011	14.4954	3.1412	1.20867	0.877334	0.983349	4.16807	0.916517	1.23706	0.90534	Q499P8	sp|Q499P8|CP058_RAT UPF0420 protein C16orf58 homolog OS=Rattus norvegicus PE=2 SV=1	5e-44
KH.C5.587.v1.A.SL1-1	216	649	629	677	865	147	1080	497	780	871	8.93729	28.0649	23.9989	25.9344	35.268	6.01534	40.9345	21.1751	34.4352	33.5194	3.1402	0.855123	1.08065	1.35989	6.80502	0.517293	1.62621	0.973404	Q5F359	sp|Q5F359|TPPC5_CHICK Trafficking protein particle complex subunit 5 OS=Gallus gallus GN=TRAPPC5 PE=2 SV=1	5e-50
KH.L18.11.v2.A.SL2-1	36	108	111	76	88	19	145	69	86	119	1.29655	4.06514	3.68636	2.53416	3.12306	0.676752	4.78373	2.55889	3.30476	3.9862	3.13536	0.906822	0.687443	1.23238	7.06866	0.534915	1.29148	1.2062	Q9H477	sp|Q9H477|RBSK_HUMAN Ribokinase OS=Homo sapiens GN=RBKS PE=1 SV=1	7e-46
KH.L95.18.v1.A.nonSL10-1	52	156	105	69	35	35	143	56	58	36	4.02043	12.6055	7.48595	4.93916	2.66654	2.67625	10.1279	4.45834	4.78468	2.58879	3.13536	0.593864	0.659791	0.539878	3.78435	0.440206	1.0732	0.541058	P33316	sp|P33316|DUT_HUMAN Deoxyuridine 5'-triphosphate nucleotidohydrolase, mitochondrial OS=Homo sapiens GN=DUT PE=1 SV=4	3e-44
KH.C11.700.v2.A.SL2-1	59	177	197	148	121	39	222	113	97	112	3.08674	9.67805	9.50393	7.16878	6.23801	2.01792	10.6393	6.08757	5.41473	5.44995	3.13536	0.982009	0.754296	0.870163	5.27243	0.572175	0.889473	1.0065	O43255	sp|O43255|SIAH2_HUMAN E3 ubiquitin-protein ligase SIAH2 OS=Homo sapiens GN=SIAH2 PE=1 SV=1	1e-53
KH.C5.634.v1.A.SL1-1	38	114	121	178	157	27	111	127	184	178	1.42404	4.46489	4.18133	6.17583	5.79764	1.00068	3.81045	4.90073	7.35723	6.2042	3.13536	0.93649	1.477	0.938764	3.80787	1.28613	1.50125	0.84328	Q91XE8	sp|Q91XE8|TM205_MOUSE Transmembrane protein 205 OS=Mus musculus GN=Tmem205 PE=2 SV=1	0.0002
KH.C9.392.v1.A.SL1-1	105	315	318	170	118	67	411	174	231	144	5.30943	16.647	14.8277	7.9587	5.87966	3.35061	19.0376	9.05992	12.4631	6.77246	3.13536	0.890716	0.536745	0.738771	5.68185	0.475895	1.37563	0.543401	Q29RQ9	sp|Q29RQ9|ORML1_BOVIN ORM1-like protein 1 OS=Bos taurus GN=ORMDL1 PE=2 SV=1	2e-33
KH.C8.805.v1.A.SL1-1	243	729	898	590	354	141	796	459	495	357	8.81475	27.6374	30.0379	19.8149	12.6537	5.0584	26.4503	17.1448	19.1587	12.0448	3.13536	1.08685	0.659663	0.638599	5.22898	0.648191	1.11746	0.628684	A8WPG6	sp|A8WPG6|CLPP1_CAEBR ATP-dependent Clp protease proteolytic subunit 1, mitochondrial OS=Caenorhabditis briggsae GN=clpp-1 PE=3 SV=2	6e-56
KH.C5.546.v2.A.SL2-1	38	114	117	121	133	33	136	125	98	138	1.81228	5.68216	5.14538	5.34273	6.25038	1.55649	5.94148	6.1386	4.98684	6.12136	3.13536	0.905532	1.03836	1.16988	3.81722	1.03318	0.812373	1.2275	A4VCH0	sp|A4VCH0|SAC1B_DANRE Phosphatidylinositide phosphatase SAC1-B OS=Danio rerio GN=sacm1lb PE=2 SV=2	3e-32
KH.C1.439.v1.A.SL3-1	48	144	154	222	156	42	338	219	177	151	1.58856	4.98071	4.69972	6.80223	5.08744	1.37468	10.2469	7.46318	6.25018	4.648	3.13536	0.943585	1.44737	0.747908	7.45401	0.728335	0.837469	0.743658	Q5R0V3	sp|Q5R0V3|AZOR2_IDILO FMN-dependent NADH-azoreductase 2 OS=Idiomarina loihiensis (strain ATCC BAA-735 / DSM 15497 / L2-TR) GN=azoR2 PE=3 SV=1	4.4
KH.C1.789.v1.A.SL1-1	352	1055	1378	1032	848	222	1183	737	786	889	10.0239	31.3989	36.1855	27.2089	23.796	6.2523	30.8599	21.6113	23.8822	23.5464	3.13239	1.15244	0.751929	0.874567	4.93577	0.700304	1.10508	0.985936	P31937	sp|P31937|3HIDH_HUMAN 3-hydroxyisobutyrate dehydrogenase, mitochondrial OS=Homo sapiens GN=HIBADH PE=1 SV=2	3e-70
KH.C8.921.v1.A.SL1-1	84	251	330	454	597	51	312	247	466	689	2.8025	8.75198	10.1524	14.0235	19.6269	1.68278	9.5353	8.48556	16.5886	21.3802	3.12292	1.16001	1.3813	1.39957	5.6664	0.88991	1.95492	1.28885	F7B645	sp|F7B645|TM231_XENTR Transmembrane protein 231 OS=Xenopus tropicalis GN=tmem231 PE=2 SV=1	1e-47
KH.L9.11.v3.C.SL3-1	76	227	284	230	166	59	254	142	148	183	2.01601	6.29318	6.94681	5.64861	4.33909	1.54782	6.17199	3.87868	4.18887	4.51498	3.12161	1.10386	0.813122	0.768169	3.98753	0.628432	1.07997	1.07785	P00432	sp|P00432|CATA_BOVIN Catalase OS=Bos taurus GN=CAT PE=1 SV=3	2e-60
KH.C9.146.v4.A.ND1-1	68	203	249	118	74	61	304	129	84	91	1.83604	5.72844	6.19958	2.94979	1.96887	1.6289	7.51902	3.58658	2.41997	2.28529	3.11999	1.08225	0.475805	0.667462	4.61601	0.477002	0.674729	0.944347	P27105	sp|P27105|STOM_HUMAN Erythrocyte band 7 integral membrane protein OS=Homo sapiens GN=STOM PE=1 SV=3	1e-67
KH.C10.58.v3.A.SL1-1	45	134	220	356	254	75	183	182	200	264	0.603558	1.87835	2.72093	4.42071	3.35701	0.994852	2.24839	2.51359	2.86215	3.29334	3.11214	1.44857	1.6247	0.759382	2.26002	1.11795	1.13867	1.15065	P42335	sp|P42335|IP3KB_RAT Inositol-trisphosphate 3-kinase B OS=Rattus norvegicus GN=Itpkb PE=1 SV=3	2e-60
KH.C1.931.v1.A.SL1-1	38	113	293	577	683	51	175	402	497	638	0.275159	0.855155	1.9564	3.86822	4.87341	0.365225	1.16078	2.99739	3.83984	4.29682	3.10786	2.28777	1.97722	1.25986	3.17827	2.58221	1.28106	1.11901	Q3UHK3	sp|Q3UHK3|GREB1_MOUSE Protein GREB1 OS=Mus musculus GN=Greb1 PE=2 SV=2	3e-09
KH.C2.384.v1.A.SL2-1	61	181	297	315	306	52	255	203	297	350	1.4592	4.52513	6.55136	6.97641	7.21306	1.23021	5.58779	5.00034	7.58052	7.78718	3.10109	1.44777	1.06488	1.03392	4.54213	0.894869	1.516	1.02726	Q497B2	sp|Q497B2|TM45B_RAT Transmembrane protein 45B OS=Rattus norvegicus GN=Tmem45b PE=2 SV=1	1e-19
KH.C5.165.v3.A.SL5-1	229	676	579	366	224	125	879	315	383	307	8.34701	25.7518	19.4609	12.3513	8.04554	4.50605	29.3493	11.8229	14.8953	10.4078	3.08516	0.755709	0.634671	0.651394	6.51331	0.402833	1.25988	0.69873	Q9EQX9	sp|Q9EQX9|UBE2N_RAT Ubiquitin-conjugating enzyme E2 N OS=Rattus norvegicus GN=Ube2n PE=1 SV=1	2e-50
KH.C8.684.v1.A.SL1-1	205	605	757	652	681	159	754	474	511	785	4.67201	14.4102	15.9087	13.7573	15.2936	3.58375	15.7411	11.1236	12.4259	16.6397	3.08438	1.10398	0.864765	1.11167	4.39235	0.70666	1.11707	1.33912	Q8BGI1	sp|Q8BGI1|RNF24_MOUSE RING finger protein 24 OS=Mus musculus GN=Rnf24 PE=2 SV=1	3e-12
KH.L170.67.v1.A.SL2-1	307	906	906	451	339	183	1049	411	385	315	16.2682	50.1758	44.2708	22.1265	17.7016	9.59051	50.9201	22.4264	21.7679	15.5252	3.0843	0.882313	0.499798	0.800018	5.30942	0.440423	0.97064	0.713213	Q5RC30	sp|Q5RC30|SC11C_PONAB Signal peptidase complex catalytic subunit SEC11C OS=Pongo abelii GN=SEC11C PE=2 SV=3	1e-56
KH.C13.163.v1.A.nonSL12-2	40	118	133	111	142	38	237	105	75	154	1.42587	4.39611	4.37181	3.66335	4.98794	1.33966	7.73895	3.85413	2.85258	5.10584	3.0831	0.994471	0.837949	1.36158	5.7768	0.498018	0.740136	1.7899	Q92643	sp|Q92643|GPI8_HUMAN GPI-anchor transamidase OS=Homo sapiens GN=PIGK PE=1 SV=2	6e-98
KH.L50.13.v1.A.SL1-1	154	454	506	167	78	121	674	157	167	112	9.79957	30.1931	29.6911	9.83871	4.89095	7.61486	39.288	10.2873	11.3386	6.62873	3.08107	0.983371	0.331369	0.497113	5.15938	0.261844	1.10219	0.584617	P82205	sp|P82205|SODC_BOMMO Superoxide dismutase [Cu-Zn] OS=Bombyx mori PE=1 SV=3	3e-33
KH.C11.670.v1.A.SL1-1	246	724	1101	1180	1262	224	916	790	828	1349	5.29983	16.3017	21.8727	23.5366	26.7916	4.77271	18.0774	17.5255	19.0333	27.0312	3.07588	1.34175	1.07607	1.13829	3.78765	0.969472	1.08603	1.42021	Q8BG09	sp|Q8BG09|T184B_MOUSE Transmembrane protein 184B OS=Mus musculus GN=Tmem184b PE=2 SV=1	6e-89
KH.L7.14.v1.A.ND1-1	51	150	141	89	9	32	157	102	63	7	1.47741	4.54137	3.7665	2.38701	0.256912	0.91679	4.16622	3.04261	1.94727	0.188605	3.07388	0.829374	0.633749	0.107629	4.54436	0.730305	0.64	0.0968561	P12659	sp|P12659|HCYA_ENTDO Hemocyanin A-type, units Ode to Odg (Fragment) OS=Enteroctopus dofleini PE=2 SV=2	0.0007
KH.C11.44.v1.A.SL2-1	48	141	238	381	256	61	238	228	236	265	0.824078	2.52995	3.76784	6.05602	4.33091	1.03573	3.74298	4.03068	4.3231	4.23154	3.07004	1.48929	1.60729	0.715141	3.61385	1.07687	1.07255	0.978821	Q5EA87	sp|Q5EA87|B4GT3_BOVIN Beta-1,4-galactosyltransferase 3 OS=Bos taurus GN=B4GALT3 PE=2 SV=2	1e-39
KH.C8.389.v1.A.ND1-1	62	182	148	88	61	24	187	81	66	55	1.89928	5.82688	4.1807	2.49584	1.84137	0.72711	5.24751	2.55505	2.15724	1.56706	3.06793	0.717485	0.59699	0.737775	7.21694	0.486908	0.844303	0.726421	Q96RW7	sp|Q96RW7|HMCN1_HUMAN Hemicentin-1 OS=Homo sapiens GN=HMCN1 PE=1 SV=2	0.0004
KH.C12.608.v1.B.ND1-1	90	264	577	654	808	106	334	441	392	710	1.2447	3.81586	7.35846	8.37405	11.0115	1.44984	4.23138	6.28026	5.78449	9.13286	3.06569	1.92839	1.13802	1.31495	2.91852	1.48421	0.921058	1.57885	Q6N021	sp|Q6N021|TET2_HUMAN Methylcytosine dioxygenase TET2 OS=Homo sapiens GN=TET2 PE=1 SV=3	1e-60
KH.C5.44.v2.A.nonSL3-1	54	158	253	364	275	62	410	314	273	286	1.60959	4.92205	6.95396	10.0452	8.07732	1.8277	11.1949	9.63761	8.68244	7.92893	3.05794	1.41282	1.44453	0.804096	6.12512	0.860894	0.900891	0.913215	Q6GLX2	sp|Q6GLX2|TM56A_XENLA Transmembrane protein 56-A OS=Xenopus laevis GN=tmem56-a PE=2 SV=1	2e-11
KH.C11.170.v1.A.SL1-1	117	342	377	165	97	110	325	174	134	113	4.31321	13.1767	12.8158	5.63162	3.52369	4.01049	10.9752	6.60512	5.27079	3.87453	3.05497	0.972608	0.439429	0.625698	2.73661	0.601824	0.797986	0.735095	Q61420	sp|Q61420|S35A1_MOUSE CMP-sialic acid transporter OS=Mus musculus GN=Slc35a1 PE=1 SV=2	1e-24
KH.C14.601.v1.A.SL1-1	399	1162	1338	1286	853	270	1479	807	986	999	12.1489	36.9773	37.5672	36.2526	25.5932	8.13051	41.252	25.3019	32.0329	28.2914	3.04368	1.01595	0.965009	0.705968	5.07373	0.613351	1.26603	0.883198	Q9CQC9	sp|Q9CQC9|SAR1B_MOUSE GTP-binding protein SAR1b OS=Mus musculus GN=Sar1b PE=1 SV=1	1e-52
KH.S1927.1.v1.A.ND1-1	172	500	618	148	10	57	450	224	66	4	13.8662	42.1275	45.9417	11.0466	0.794405	4.5446	33.2319	18.5949	5.67715	0.299927	3.03814	1.09054	0.240447	0.0719143	7.31241	0.55955	0.305306	0.0528306	Q9U9L2	sp|Q9U9L2|RL8_ANOGA 60S ribosomal protein L8 OS=Anopheles gambiae GN=RpL8 PE=2 SV=2	2e-18
KH.C5.164.v1.A.ND1-1	51	148	188	167	139	49	153	109	158	154	1.25785	3.81492	4.27567	3.81337	3.37819	1.19521	3.4567	2.76822	4.15787	3.53268	3.0329	1.12078	0.891877	0.88588	2.89213	0.800827	1.502	0.849637	Q9Y672	sp|Q9Y672|ALG6_HUMAN Dolichyl pyrophosphate Man9GlcNAc2 alpha-1,3-glucosyltransferase OS=Homo sapiens GN=ALG6 PE=1 SV=1	1e-54
KH.C7.356.v1.A.SL1-1	217	629	562	498	483	137	652	209	464	683	9.90095	29.994	23.6452	21.0369	21.7158	6.18199	27.2507	9.81929	22.5887	28.9844	3.0294	0.78833	0.889691	1.03227	4.40808	0.360332	2.30044	1.28313	Q9CR60	sp|Q9CR60|GOT1B_MOUSE Vesicle transport protein GOT1B OS=Mus musculus GN=Golt1b PE=2 SV=1	5e-18
KH.C1.787.v1.A.SL1-1	205	594	849	1046	1371	196	772	713	875	1443	1.56865	4.75033	5.99056	7.41034	10.3376	1.48326	5.4113	5.61795	7.1439	10.2698	3.0283	1.26108	1.237	1.39503	3.64824	1.03819	1.27162	1.43757	Q9HCD6	sp|Q9HCD6|TANC2_HUMAN Protein TANC2 OS=Homo sapiens GN=TANC2 PE=1 SV=3	6e-69
KH.L18.18.v1.A.nonSL5-4	46	133	115	69	15	29	112	61	44	17	3.37784	10.207	7.78696	4.691	1.08539	2.10605	7.53377	4.61241	3.44739	1.16106	3.02176	0.762902	0.602418	0.231376	3.5772	0.612231	0.747416	0.336795	Q9UNL2	sp|Q9UNL2|SSRG_HUMAN Translocon-associated protein subunit gamma OS=Homo sapiens GN=SSR3 PE=1 SV=1	3e-10
KH.L107.2.v2.A.ND1-1	191	552	475	215	132	84	673	196	213	152	7.49884	22.6499	17.1966	7.81509	5.10677	3.2616	24.2041	7.9238	8.9227	5.55047	3.02045	0.759237	0.454455	0.65345	7.42093	0.327374	1.12606	0.622062	Q2T9V8	sp|Q2T9V8|DTD1_BOVIN D-tyrosyl-tRNA(Tyr) deacylase 1 OS=Bos taurus GN=DTD1 PE=2 SV=1	1e-45
KH.C1.262.v1.R.ND2-1	73	210	195	179	118	46	285	144	162	162	2.711	8.15064	6.67775	6.15453	4.31818	1.68949	9.69537	5.50663	6.41915	5.59561	3.00651	0.819291	0.921647	0.701626	5.73865	0.567965	1.16571	0.871705	Q8N6L1	sp|Q8N6L1|KTAP2_HUMAN Keratinocyte-associated protein 2 OS=Homo sapiens GN=KRTCAP2 PE=1 SV=2	3e-16
KH.S484.3.v2.A.SL1-1	949	2724	2428	849	438	478	2815	804	647	429	34.8149	104.441	82.1366	28.8365	15.8338	17.3427	94.6	30.3719	25.3256	14.638	2.9999	0.786437	0.351079	0.54909	5.45473	0.321056	0.83385	0.577993	P28648	sp|P28648|CD63_RAT CD63 antigen OS=Rattus norvegicus GN=Cd63 PE=1 SV=2	2e-13
KH.L107.2.v2.A.nonSL14-1	219	626	592	255	152	107	737	243	215	166	8.43012	25.1843	21.0136	9.08793	5.76561	4.07347	25.9879	9.63192	8.83049	5.94325	2.98742	0.834392	0.432479	0.634425	6.37979	0.370632	0.916794	0.673037	Q2T9V8	sp|Q2T9V8|DTD1_BOVIN D-tyrosyl-tRNA(Tyr) deacylase 1 OS=Bos taurus GN=DTD1 PE=2 SV=1	1e-43
KH.C2.797.v1.A.nonSL3-1	61	174	161	83	14	42	209	83	98	20	2.32833	6.94114	5.6667	2.93311	0.526569	1.58546	7.30761	3.2622	3.99115	0.710022	2.98116	0.816393	0.517605	0.179526	4.60914	0.446412	1.22345	0.177899	Q9XT28	sp|Q9XT28|ATOX1_SHEEP Copper transport protein ATOX1 OS=Ovis aries GN=ATOX1 PE=3 SV=1	0.0002
KH.C10.69.v1.A.SL2-1	142	405	319	260	144	86	385	167	237	128	5.36134	15.9811	11.1062	9.08853	5.35747	3.21125	13.3155	6.4926	9.5475	4.49491	2.9808	0.694958	0.818331	0.589476	4.14653	0.487595	1.47052	0.470794	Q1ATH8	sp|Q1ATH8|PDXH_RUBXD Pyridoxine/pyridoxamine 5'-phosphate oxidase OS=Rubrobacter xylanophilus (strain DSM 9941 / NBRC 16129) GN=pdxH PE=3 SV=2	2e-19
KH.C8.533.v3.A.ND2-1	40	114	110	142	159	45	173	134	100	197	0.684915	2.04008	1.73683	2.25113	2.68278	0.762043	2.71354	2.36264	1.82698	3.13739	2.97859	0.851355	1.29611	1.19175	3.56087	0.870688	0.773276	1.71726	Q9UNH5	sp|Q9UNH5|CC14A_HUMAN Dual specificity protein phosphatase CDC14A OS=Homo sapiens GN=CDC14A PE=1 SV=1	2e-112
KH.C12.680.v1.A.SL1-1	128	364	397	278	437	134	455	205	236	413	5.20117	15.4582	14.8755	10.4585	17.4979	5.38501	16.9362	8.57753	10.232	15.6087	2.97206	0.962303	0.703073	1.67307	3.14506	0.506461	1.19288	1.52548	Q5U395	sp|Q5U395|CNEPA_DANRE CTD nuclear envelope phosphatase 1A OS=Danio rerio GN=ctdnep1a PE=2 SV=1	3e-63
KH.L170.91.v1.A.SL1-1	83	236	242	181	144	64	259	168	182	117	4.08305	12.1335	10.9777	8.24367	6.98041	3.1137	11.6713	8.51006	9.55288	5.35326	2.97167	0.904745	0.750948	0.846761	3.74837	0.729144	1.12254	0.560382	Q7T0P7	sp|Q7T0P7|ATP23_XENLA Mitochondrial inner membrane protease ATP23 homolog OS=Xenopus laevis PE=2 SV=1	1e-21
KH.S821.1.v1.A.SL1-1	182	516	690	554	897	163	648	446	497	851	4.57089	13.544	15.9797	12.8817	22.199	4.04863	14.908	11.534	13.3181	19.8786	2.96309	1.17984	0.806134	1.72329	3.68222	0.773684	1.15468	1.4926	Q6IRP4	sp|Q6IRP4|ABHDD_XENLA Alpha/beta hydrolase domain-containing protein 13 OS=Xenopus laevis GN=abhd13 PE=2 SV=1	1e-30
KH.C9.111.v1.A.SL1-1	36	102	124	91	48	29	107	68	67	79	2.52877	7.48812	8.03188	5.91811	3.32246	2.01463	6.88499	4.9185	5.02155	5.16131	2.96117	1.07262	0.736828	0.561405	3.4175	0.714379	1.02095	1.02783	B0JYX6	sp|B0JYX6|TM218_XENTR Transmembrane protein 218 OS=Xenopus tropicalis GN=tmem218 PE=3 SV=1	0.36
KH.L71.28.v1.A.SL2-1	101	286	331	458	471	63	265	191	249	483	2.03922	6.03498	6.16255	8.56139	9.37079	1.25798	4.9012	3.97094	5.36413	9.07019	2.95945	1.02114	1.38926	1.09454	3.89608	0.810198	1.35084	1.6909	P48727	sp|P48727|GLC7B_CAEEL Serine/threonine-protein phosphatase PP1-beta OS=Caenorhabditis elegans GN=gsp-2 PE=2 SV=1	4e-146
KH.C8.697.v1.A.SL1-1	65	184	248	263	157	74	235	158	259	227	2.4894	7.36488	8.75834	9.32551	5.92507	2.80287	8.24447	6.23097	10.5837	8.08599	2.95849	1.1892	1.06476	0.635361	2.94143	0.755776	1.69856	0.764004	Q2M2S2	sp|Q2M2S2|SMDT1_BOVIN Single-pass membrane protein with aspartate-rich tail 1, mitochondrial OS=Bos taurus GN=SMDT1 PE=3 SV=1	6e-06
KH.C13.109.v1.A.SL2-1	57	161	160	115	108	47	206	104	106	96	2.31407	6.83116	5.98978	4.3225	4.32054	1.88708	7.66095	4.34763	4.5916	3.62493	2.95201	0.876833	0.721646	0.999546	4.05968	0.567505	1.05612	0.789469	Q96AT9	sp|Q96AT9|RPE_HUMAN Ribulose-phosphate 3-epimerase OS=Homo sapiens GN=RPE PE=1 SV=1	6e-59
KH.L60.5.v1.A.SL2-1	81	228	272	164	61	49	313	132	166	74	3.22768	9.49526	9.99456	6.05041	2.39523	1.93104	11.4252	5.41622	7.05781	2.74261	2.94182	1.05258	0.605371	0.395879	5.91658	0.47406	1.30309	0.388591	Q60HG2	sp|Q60HG2|TOR1A_MACFA Torsin-1A OS=Macaca fascicularis GN=TOR1A PE=2 SV=1	8e-39
KH.L61.13.v1.A.SL1-1	185	519	530	577	437	136	929	461	567	470	8.05944	23.6302	21.2911	23.2725	18.7597	5.85952	37.0734	20.68	26.3556	19.0439	2.93199	0.901013	1.09307	0.806088	6.32703	0.557813	1.27445	0.722577	Q9UK41	sp|Q9UK41|VPS28_HUMAN Vacuolar protein sorting-associated protein 28 homolog OS=Homo sapiens GN=VPS28 PE=1 SV=1	2e-57
KH.C8.695.v1.A.SL1-1	159	446	563	559	414	105	562	392	531	460	6.06894	17.7917	19.8159	19.7543	15.5714	3.96365	19.6501	15.407	21.6255	16.3305	2.93159	1.11377	0.996896	0.788252	4.95758	0.784067	1.40361	0.755149	Q17QG5	sp|Q17QG5|UB2G2_BOVIN Ubiquitin-conjugating enzyme E2 G2 OS=Bos taurus GN=UBE2G2 PE=2 SV=1	3e-61
KH.C4.135.v1.A.SL1-2	69	193	285	397	304	70	224	232	287	359	1.49364	4.36637	5.68893	7.95651	6.48459	1.4986	4.44179	5.17133	6.62881	7.22799	2.92331	1.3029	1.3986	0.815004	2.96396	1.16424	1.28184	1.09039	Q8NI37	sp|Q8NI37|PPTC7_HUMAN Protein phosphatase PTC7 homolog OS=Homo sapiens GN=PPTC7 PE=2 SV=1	6e-58
KH.C2.915.v1.A.nonSL2-1	59	165	212	95	43	42	202	95	106	44	2.85895	8.35612	9.47282	4.262	2.05322	2.01277	8.96642	4.74018	5.48046	1.98305	2.92279	1.13364	0.449919	0.48175	4.45477	0.528659	1.15617	0.36184	Q9CZL5	sp|Q9CZL5|PHS2_MOUSE Pterin-4-alpha-carbinolamine dehydratase 2 OS=Mus musculus GN=Pcbd2 PE=1 SV=2	3e-27
KH.L173.2.v1.A.nonSL2-1	63	176	206	64	8	51	132	117	41	10	1.94173	5.66928	5.8547	1.82627	0.242969	1.55457	3.7268	3.71323	1.34831	0.286665	2.9197	1.03271	0.311931	0.133041	2.39732	0.996358	0.363109	0.212611	Q8CI51	sp|Q8CI51|PDLI5_MOUSE PDZ and LIM domain protein 5 OS=Mus musculus GN=Pdlim5 PE=1 SV=4	9e-33
KH.L93.3.v1.A.SL1-1	206	575	815	433	318	177	641	341	244	339	7.19604	20.9923	26.2526	14.0039	10.9463	6.11491	20.5115	12.2658	9.09437	11.0142	2.9172	1.25058	0.533429	0.781657	3.35434	0.597998	0.741438	1.2111	Q5I085	sp|Q5I085|PP1B_XENTR Serine/threonine-protein phosphatase PP1-beta catalytic subunit OS=Xenopus tropicalis GN=ppp1cb PE=2 SV=1	1e-145
KH.C7.236.v1.A.ND1-1	106	295	312	223	165	80	530	185	271	221	7.01103	20.3922	19.0291	13.6558	10.754	5.23307	32.1118	12.5998	19.125	13.5955	2.90859	0.933158	0.717624	0.78751	6.13633	0.392373	1.51788	0.710874	O75394	sp|O75394|RM33_HUMAN 39S ribosomal protein L33, mitochondrial OS=Homo sapiens GN=MRPL33 PE=1 SV=1	0.71
KH.L119.15.v1.A.SL2-1	266	740	731	635	385	149	1095	431	702	418	8.23766	23.9508	20.8751	18.2067	11.7488	4.56351	31.0634	13.7441	23.1961	12.0399	2.90748	0.871582	0.872173	0.645303	6.80692	0.442453	1.68772	0.51905	Q4KMD3	sp|Q4KMD3|U1SBP_DANRE U11/U12 small nuclear ribonucleoprotein 35 kDa protein OS=Danio rerio GN=snrnp35 PE=2 SV=1	3e-19
KH.S164.27.v1.A.SL1-1	41	114	160	299	246	47	207	207	294	372	1.37396	3.99264	4.94423	9.27675	8.12338	1.55768	6.35438	7.14294	10.5122	11.5947	2.90594	1.23833	1.87628	0.87567	4.07939	1.1241	1.47169	1.10297	Q8KQL2	sp|Q8KQL2|ARPD_ENTAV D-arabitol-phosphate dehydrogenase OS=Enterococcus avium PE=1 SV=1	2e-07
KH.C10.78.v3.A.SL3-1	380	1056	824	380	312	228	1262	348	383	365	12.5578	36.4719	25.1099	11.6265	10.16	7.45168	38.2033	11.842	13.5047	11.2188	2.90433	0.688471	0.463023	0.873872	5.12681	0.309973	1.1404	0.830737	Q5U305	sp|Q5U305|ERD22_RAT ER lumen protein retaining receptor 2 OS=Rattus norvegicus GN=Kdelr2 PE=2 SV=1	1e-89
KH.C7.319.v1.C.SL1-1	96	265	336	337	309	64	302	234	292	382	3.14496	9.07311	10.1501	10.2214	9.97504	2.07355	9.06284	7.89363	10.2067	11.6395	2.88497	1.11871	1.00702	0.9759	4.37069	0.870989	1.29302	1.14038	Q5REH2	sp|Q5REH2|ZDHC6_PONAB Palmitoyltransferase ZDHHC6 OS=Pongo abelii GN=ZDHHC6 PE=3 SV=1	2e-62
KH.C7.597.v1.A.SL1-1	388	1071	1036	632	393	239	1346	614	569	411	20.1827	58.2242	49.6932	30.4369	20.1443	12.2952	64.1367	32.8877	31.5803	19.8846	2.88485	0.853479	0.612497	0.661839	5.21639	0.512775	0.960248	0.62965	O60573	sp|O60573|IF4E2_HUMAN Eukaryotic translation initiation factor 4E type 2 OS=Homo sapiens GN=EIF4E2 PE=1 SV=1	6e-66
KH.C8.858.v1.A.SL1-1	53	146	226	411	456	34	126	226	304	462	2.46538	7.09784	9.69403	17.7005	20.9018	1.56414	5.36897	10.8251	15.0882	19.9883	2.87901	1.36577	1.82591	1.18086	3.43253	2.01624	1.39381	1.32476	Q6GN70	sp|Q6GN70|B9D2_XENLA B9 domain-containing protein 2 OS=Xenopus laevis GN=b9d2 PE=2 SV=1	2e-52
KH.C9.316.v2.A.SL1-1	44	121	81	122	106	28	189	89	126	100	1.11744	3.21161	1.8969	2.86858	2.65271	0.703267	4.3969	2.32744	3.41427	2.3621	2.87408	0.590639	1.51224	0.924747	6.25211	0.529337	1.46697	0.691829	Q5ZLG1	sp|Q5ZLG1|RAB18_CHICK Ras-related protein Rab-18 OS=Gallus gallus GN=RAB18 PE=2 SV=1	5e-63
KH.C3.720.v1.A.SL1-1	335	918	980	449	357	344	879	403	299	488	12.152	34.8027	32.7807	15.0794	12.761	12.3411	29.2083	15.0531	11.5726	16.4645	2.86394	0.941903	0.460009	0.84625	2.36675	0.515371	0.768786	1.42272	Q6P539	sp|Q6P539|F222B_MOUSE Protein FAM222B OS=Mus musculus GN=Fam222b PE=2 SV=2	0.48
KH.C8.97.v1.R.ND2-2	61	167	113	61	33	35	175	78	42	40	2.16255	6.18754	3.69405	2.00217	1.15282	1.22714	5.68312	2.84739	1.5887	1.31893	2.86123	0.597014	0.541998	0.575786	4.63119	0.501026	0.557949	0.830195	Q3KNM2	sp|Q3KNM2|MARH5_MOUSE E3 ubiquitin-protein ligase MARCH5 OS=Mus musculus GN=March5 PE=2 SV=1	4e-68
KH.C2.121.v1.A.ND1-1	38	104	242	538	631	48	163	256	282	623	0.829321	2.37213	4.87016	10.8707	13.57	1.03603	3.25867	5.75302	6.56666	12.646	2.86033	2.05307	2.2321	1.24831	3.14535	1.76545	1.14143	1.92579	P62994	sp|P62994|GRB2_RAT Growth factor receptor-bound protein 2 OS=Rattus norvegicus GN=Grb2 PE=1 SV=1	4e-08
KH.C7.486.v2.A.SL4-1	365	997	849	442	278	170	1059	396	358	336	11.6213	33.1759	24.9263	13.0292	8.72204	5.35304	30.8866	12.983	12.1619	9.95008	2.85475	0.751338	0.52271	0.669421	5.76992	0.420342	0.936758	0.818137	Q8AWB6	sp|Q8AWB6|S35B1_CHICK Solute carrier family 35 member B1 OS=Gallus gallus GN=SLC35B1 PE=2 SV=1	7e-55
KH.C3.12.v1.A.SL1-1	69	188	143	199	150	44	192	167	183	153	2.03793	5.80317	3.89463	5.44163	4.3656	1.28524	5.19464	5.07895	5.76698	4.20299	2.84757	0.671121	1.39722	0.80226	4.04177	0.97773	1.13547	0.728803	O15084	sp|O15084|ANR28_HUMAN Serine/threonine-protein phosphatase 6 regulatory ankyrin repeat subunit A OS=Homo sapiens GN=ANKRD28 PE=1 SV=5	2e-14
KH.C8.390.v1.A.nonSL6-1	50	136	101	46	20	30	212	35	64	30	2.49488	7.09227	4.64719	2.12507	0.983382	1.48044	9.69013	1.79831	3.40735	1.39228	2.84273	0.655247	0.457281	0.462753	6.54542	0.185582	1.89475	0.408612	Q5E9E4	sp|Q5E9E4|SSRB_BOVIN Translocon-associated protein subunit beta OS=Bos taurus GN=SSR2 PE=2 SV=1	3e-26
KH.C11.340.v1.A.SL1-2	385	1045	1025	691	533	301	1489	574	705	609	19.2106	54.4958	47.1621	31.9223	26.2071	14.8538	68.0594	29.4923	37.5341	28.2634	2.83675	0.865426	0.676863	0.820967	4.58196	0.433332	1.27267	0.753005	Q5RDB5	sp|Q5RDB5|CNIH1_PONAB Protein cornichon homolog 1 OS=Pongo abelii GN=CNIH1 PE=2 SV=1	3e-41
KH.C4.491.v1.A.SL2-1	143	388	459	351	323	76	672	282	293	373	6.70002	18.9993	19.8308	15.2259	14.9126	3.52163	28.8418	13.6052	14.6475	16.2545	2.83571	1.04377	0.767787	0.979427	8.1899	0.471719	1.07661	1.10971	Q3T0A6	sp|Q3T0A6|BCL7B_BOVIN B-cell CLL/lymphoma 7 protein family member B OS=Bos taurus GN=BCL7B PE=2 SV=1	1e-14
KH.L142.18.v1.A.nonSL2-1	108	293	248	166	84	74	406	115	144	97	3.49762	9.91705	7.40609	4.97728	2.68065	2.37012	12.0445	3.83498	4.97585	2.92177	2.83537	0.746804	0.672052	0.538577	5.08179	0.318402	1.29749	0.58719	P74148	sp|P74148|Y1388_SYNY3 Universal stress protein Sll1388 OS=Synechocystis sp. (strain PCC 6803 / Kazusa) GN=sll1388 PE=3 SV=1	0.026
KH.C1.1226.v1.A.ND1-1	52	141	139	118	70	51	247	131	71	70	1.15659	3.27763	2.85088	2.42992	1.53421	1.12185	5.03252	3.00029	1.68496	1.4481	2.83388	0.869798	0.852341	0.631383	4.4859	0.596181	0.561599	0.859428	C3YWU0	sp|C3YWU0|FUCO_BRAFL Alpha-L-fucosidase OS=Branchiostoma floridae GN=BRAFLDRAFT_56888 PE=3 SV=2	6e-112
KH.C2.600.v2.A.SL2-1	44	119	192	165	106	39	176	114	119	118	1.45618	4.11601	5.8594	5.05571	3.45685	1.27649	5.33567	3.88494	4.2021	3.63221	2.82657	1.42356	0.862838	0.683752	4.17995	0.728108	1.08164	0.86438	Q9NWT6	sp|Q9NWT6|HIF1N_HUMAN Hypoxia-inducible factor 1-alpha inhibitor OS=Homo sapiens GN=HIF1AN PE=1 SV=2	2e-64
KH.C1.171.v2.A.nonSL12-1	37	100	127	37	8	20	100	37	56	17	1.69844	4.7975	5.37578	1.57248	0.361869	0.907966	4.20496	1.74891	2.7428	0.725812	2.82465	1.12054	0.292512	0.230126	4.63119	0.415916	1.56829	0.264625	Q5ZHU0	sp|Q5ZHU0|HRG1_CHICK Heme transporter HRG1 OS=Gallus gallus GN=SLC48A1 PE=2 SV=1	1e-12
KH.L7.14.v1.A.nonSL11-1	52	140	131	60	9	34	165	87	52	7	1.53184	4.31027	3.55853	1.63643	0.261255	0.990557	4.45253	2.63904	1.63444	0.191794	2.81378	0.825593	0.459861	0.15965	4.49498	0.592706	0.619332	0.117345	P12659	sp|P12659|HCYA_ENTDO Hemocyanin A-type, units Ode to Odg (Fragment) OS=Enteroctopus dofleini PE=2 SV=2	1e-05
KH.C4.198.v1.A.SL1-1	861	2317	2010	1503	937	622	3422	1304	1415	1057	15.4493	43.4507	33.2575	24.9689	16.5675	11.0379	56.2468	24.0935	27.0905	17.6403	2.81248	0.765407	0.750774	0.663525	5.0958	0.428352	1.12439	0.651161	P07686	sp|P07686|HEXB_HUMAN Beta-hexosaminidase subunit beta OS=Homo sapiens GN=HEXB PE=1 SV=3	4e-99
KH.L37.67.v1.A.SL1-1	123	330	501	1229	262	143	340	581	502	352	2.05108	5.75118	7.70377	18.9742	4.30517	2.35832	5.1936	9.9763	8.93175	5.4594	2.80398	1.33951	2.46298	0.226896	2.20224	1.92088	0.895297	0.611235	P21980	sp|P21980|TGM2_HUMAN Protein-glutamine gamma-glutamyltransferase 2 OS=Homo sapiens GN=TGM2 PE=1 SV=2	4e-53
KH.S854.1.v1.A.SL1-1	2869	7688	6497	2840	1158	2183	6664	3196	1826	1628	159.688	447.22	333.46	146.351	63.513	120.167	339.774	183.175	108.442	84.2796	2.80059	0.745628	0.438886	0.433977	2.82751	0.539108	0.592016	0.777183	Q32L83	sp|Q32L83|BRI3_BOVIN Brain protein I3 OS=Bos taurus GN=BRI3 PE=2 SV=1	5e-09
KH.C1.827.v1.B.SL2-1	90	241	189	86	64	54	388	113	165	89	11.9579	33.4653	23.1559	10.579	8.37922	7.09571	47.2234	15.4599	23.3912	10.9984	2.7986	0.691938	0.45686	0.79206	6.65519	0.327379	1.51302	0.470192	Q9QXT0	sp|Q9QXT0|CNPY2_MOUSE Protein canopy homolog 2 OS=Mus musculus GN=Cnpy2 PE=1 SV=1	7e-11
KH.C3.204.v1.A.SL1-1	113	302	295	211	179	60	443	167	182	192	6.39164	17.8528	15.3867	11.0497	9.97697	3.35641	22.9536	9.72674	10.984	10.1009	2.79315	0.861862	0.718136	0.902916	6.83873	0.423757	1.12926	0.919601	P84104	sp|P84104|SRSF3_MOUSE Serine/arginine-rich splicing factor 3 OS=Mus musculus GN=Srsf3 PE=1 SV=1	3e-24
KH.L22.15.v4.A.SL1-1	57	152	148	151	119	61	218	94	133	147	2.68173	7.47394	6.42082	6.57737	5.51695	2.83831	9.39528	4.55391	6.67649	6.43255	2.78699	0.859094	1.02438	0.838778	3.31016	0.484702	1.4661	0.963464	Q7ZUU1	sp|Q7ZUU1|UNC50_DANRE Protein unc-50 homolog OS=Danio rerio GN=unc50 PE=2 SV=1	7e-62
KH.C2.416.v1.A.ND1-1	868	2313	3387	3197	2925	741	2204	2970	3982	2658	126.86	353.302	456.466	432.596	421.252	107.106	295.073	446.97	620.958	361.315	2.78498	1.292	0.947706	0.973778	2.75497	1.51478	1.38926	0.581866	P19560	sp|P19560|POL_BIV29 Gag-Pol polyprotein OS=Bovine immunodeficiency virus (strain R29) GN=gag-pol PE=1 SV=2	1.7
KH.L154.46.v1.A.SL2-1	178	474	576	530	725	158	621	393	400	902	5.29178	14.7274	15.7904	14.5879	21.2389	4.64546	16.9117	12.0307	12.6881	24.941	2.78307	1.07218	0.923846	1.45592	3.64047	0.711385	1.05465	1.9657	Q6P861	sp|Q6P861|PP4C_XENTR Serine/threonine-protein phosphatase 4 catalytic subunit OS=Xenopus tropicalis GN=ppp4c PE=2 SV=1	5e-123
KH.L116.75.v1.A.SL9-1	74	197	193	125	89	47	224	102	89	127	3.11014	8.65326	7.47986	4.86399	3.68595	1.9536	8.624	4.41433	3.99111	4.96452	2.78228	0.864398	0.650278	0.757804	4.41441	0.511865	0.904127	1.24389	Q14AM7	sp|Q14AM7|CP072_MOUSE UPF0472 protein C16orf72 homolog OS=Mus musculus PE=2 SV=1	2e-22
KH.L57.19.v1.A.SL2-1	38	101	147	158	143	47	161	116	184	155	1.9045	5.29036	6.79366	7.33145	7.0623	2.32963	7.39157	5.9865	9.83948	7.22529	2.77782	1.28416	1.07916	0.963287	3.17286	0.809908	1.64361	0.734317	Q86I22	sp|Q86I22|FAHD1_DICDI Acylpyruvase FAHD1, mitochondrial OS=Dictyostelium discoideum GN=fahd1 PE=3 SV=1	3e-38
KH.C3.687.v1.C.SL1-1	76	202	252	299	292	59	248	161	279	350	8.23766	22.8827	25.1872	30.0052	31.1878	6.32459	24.6238	17.9694	32.2664	35.2845	2.77782	1.10071	1.19129	1.03941	3.89334	0.729756	1.79563	1.09354	Q5R9W6	sp|Q5R9W6|TAF13_PONAB Transcription initiation factor TFIID subunit 13 OS=Pongo abelii GN=TAF13 PE=2 SV=1	6e-25
KH.C14.479.v1.C.ND1-1	165	438	334	235	289	176	674	199	216	265	10.2971	28.5674	19.2205	13.5779	17.7721	10.8626	38.5303	12.7879	14.3827	15.3816	2.77432	0.672814	0.706428	1.3089	3.54707	0.331892	1.12471	1.06945	P58709	sp|P58709|DALD_YERPE D-arabinitol 4-dehydrogenase OS=Yersinia pestis GN=dalD PE=3 SV=1	4.8
KH.C10.421.v1.A.SL1-1	606	1607	1694	675	314	380	2040	833	540	340	36.0316	99.8604	92.8781	37.1578	18.3973	22.3453	111.11	51.0004	34.258	18.8025	2.77147	0.93008	0.400071	0.495111	4.97244	0.459006	0.67172	0.548851	Q62048	sp|Q62048|PEA15_MOUSE Astrocytic phosphoprotein PEA-15 OS=Mus musculus GN=Pea15 PE=1 SV=1	4e-06
KH.C7.776.v1.A.SL1-1	43	114	80	49	21	34	118	31	31	19	1.37585	3.81219	2.36038	1.45156	0.662116	1.0759	3.45858	1.02137	1.05833	0.565435	2.77078	0.619167	0.614968	0.456142	3.21459	0.295314	1.03619	0.534271	Q2K7X5	sp|Q2K7X5|PURQ_RHIEC Phosphoribosylformylglycinamidine synthase 1 OS=Rhizobium etli (strain CFN 42 / ATCC 51251) GN=purQ PE=3 SV=1	0.32
KH.C11.542.v1.A.SL1-1	530	1402	992	1005	119	617	1344	414	476	134	18.8335	52.0679	32.5055	33.0642	4.16692	21.6836	43.749	15.1486	18.0476	4.42881	2.76464	0.62429	1.01719	0.126025	2.01761	0.346262	1.19137	0.245396	P27591	sp|P27591|IM23_SCHJA 23 kDa integral membrane protein OS=Schistosoma japonicum PE=2 SV=1	0.034
KH.C14.406.v1.C.ND1-1	1172	3093	4324	4529	3910	1032	2902	3859	5111	3239	200.377	552.671	681.703	716.899	658.733	174.498	454.497	679.379	932.358	515.059	2.75815	1.23347	1.05163	0.918864	2.6046	1.49479	1.37237	0.552427	Q2T213	sp|Q2T213|Y228_BURTA UPF0271 protein BTH_I0228 OS=Burkholderia thailandensis (strain E264 / ATCC 700388 / DSM 13276 / CIP 106301) GN=BTH_I0228 PE=3 SV=1	3.4
KH.C10.357.v4.A.SL3-2	141	372	334	251	291	106	633	244	225	305	4.01023	11.0576	8.75963	6.60936	8.15559	2.98158	16.4918	7.1459	6.82794	8.06819	2.75734	0.792184	0.754525	1.23395	5.53122	0.433301	0.955503	1.18164	Q6AZN8	sp|Q6AZN8|ZNT6A_XENLA Zinc transporter 6-A OS=Xenopus laevis GN=slc30a6-a PE=2 SV=1	4e-48
KH.C7.516.v1.A.nonSL9-1	49	129	151	71	28	42	178	66	81	45	3.04533	8.37905	8.65375	4.08538	1.71478	2.58154	10.1338	4.22376	5.37131	2.60122	2.75144	1.03278	0.472093	0.419736	3.92549	0.4168	1.27169	0.484281	Q54Y25	sp|Q54Y25|U369_DICDI UPF0369 protein OS=Dictyostelium discoideum GN=DDB_G0278459 PE=3 SV=1	1e-07
KH.C1.538.v2.A.SL2-1	229	602	659	364	190	133	746	305	311	219	7.28604	20.0179	19.3344	10.7224	5.95692	4.18503	21.7424	9.99247	10.5578	6.48077	2.74743	0.965854	0.554578	0.555557	5.19529	0.459584	1.05657	0.613837	P70470	sp|P70470|LYPA1_RAT Acyl-protein thioesterase 1 OS=Rattus norvegicus GN=Lypla1 PE=1 SV=1	5e-30
KH.C3.296.v2.A.SL2-1	191	502	529	188	60	94	622	193	215	83	8.53418	23.4422	21.7958	7.77717	2.64175	4.15381	25.4584	8.87979	10.25	3.44931	2.74686	0.929768	0.356819	0.33968	6.12894	0.348795	1.15431	0.336519	Q5PQ71	sp|Q5PQ71|ISOC2_XENLA Isochorismatase domain-containing protein 2, mitochondrial OS=Xenopus laevis GN=isoc2 PE=2 SV=1	1e-45
KH.C8.298.v1.A.nonSL7-1	51	134	145	89	26	29	174	82	91	29	2.22393	6.10691	5.83052	3.59315	1.11721	1.25066	6.95045	3.68198	4.23398	1.17618	2.746	0.954742	0.616266	0.310928	5.55743	0.529747	1.14992	0.277796	Q3T0Z7	sp|Q3T0Z7|DHPR_BOVIN Dihydropteridine reductase OS=Bos taurus GN=QDPR PE=2 SV=1	5e-38
KH.C12.59.v1.A.SL1-1	45	118	161	88	34	44	236	82	104	54	2.55171	6.99307	8.41849	4.61995	1.89981	2.46753	12.2587	4.78796	6.2923	2.848	2.74054	1.20383	0.548786	0.411219	4.96801	0.390576	1.31419	0.452616	Q6VAK4	sp|Q6VAK4|HP1_ORYSJ Histidine-containing phosphotransfer protein 1 OS=Oryza sativa subsp. japonica GN=HP1 PE=1 SV=1	1.1
KH.C14.220.v2.A.SL2-1	528	1384	1501	1016	383	347	1198	796	532	447	17.1117	46.8772	44.8568	30.4851	12.2312	11.1219	35.5655	26.5637	18.3962	13.4739	2.73948	0.956901	0.679609	0.401219	3.19779	0.746896	0.692529	0.732429	Q4R5M4	sp|Q4R5M4|YIPF5_MACFA Protein YIPF5 OS=Macaca fascicularis GN=YIPF5 PE=2 SV=1	8e-37
KH.C8.283.v1.A.SL1-1	303	794	699	921	1669	292	1340	732	681	1509	5.49342	15.0448	11.686	15.4595	29.8173	5.23568	22.2545	13.6656	13.1736	25.4457	2.7387	0.776746	1.32291	1.92874	4.25055	0.614059	0.963997	1.93158	Q566C7	sp|Q566C7|NUDT3_RAT Diphosphoinositol polyphosphate phosphohydrolase 1 OS=Rattus norvegicus GN=Nudt3 PE=1 SV=1	3e-30
KH.C3.340.v1.A.nonSL3-1	44	115	156	244	327	66	160	126	264	360	0.959342	2.6205	3.13642	4.92545	7.02555	1.42316	3.19561	2.82884	6.14159	7.30044	2.73156	1.19688	1.5704	1.42638	2.24543	0.885226	2.17107	1.18869	A5PLL7	sp|A5PLL7|TM189_HUMAN Transmembrane protein 189 OS=Homo sapiens GN=TMEM189 PE=1 SV=3	3e-47
KH.C9.402.v2.A.nonSL3-1	85	222	304	311	107	74	238	139	257	117	4.2227	11.5263	13.9262	14.3043	5.23802	3.63575	10.8308	7.11055	13.6226	5.40609	2.72961	1.20821	1.02715	0.366185	2.97898	0.65651	1.91583	0.396846	Q5R4M1	sp|Q5R4M1|ARP5L_PONAB Actin-related protein 2/3 complex subunit 5-like protein OS=Pongo abelii GN=ARPC5L PE=2 SV=1	2e-15
KH.C11.459.v2.A.nonSL6-1	41	107	99	37	10	29	145	34	32	15	2.87553	7.84303	6.40262	2.40254	0.691108	2.01151	9.31569	2.45544	2.39464	0.978478	2.72751	0.816346	0.375243	0.287657	4.63119	0.263581	0.975238	0.408612	P28771	sp|P28771|EPD2_ONCMY Ependymin-2 OS=Oncorhynchus mykiss GN=epd2 PE=2 SV=1	4.5
KH.C12.193.v1.A.ND2-1	41	107	169	226	199	42	147	136	194	193	1.26195	3.44198	4.79661	6.44024	6.03564	1.27849	4.14466	4.31037	6.37113	5.52512	2.72751	1.39356	1.34267	0.937177	3.24183	1.03998	1.47809	0.867212	Q8R0N9	sp|Q8R0N9|ZDHC1_MOUSE Probable palmitoyltransferase ZDHHC1 OS=Mus musculus GN=Zdhhc1 PE=2 SV=2	6e-25
KH.C9.5.v1.A.SL1-1	602	1570	1410	425	126	341	1806	413	304	178	23.9885	65.384	51.81	15.6794	4.94753	13.4385	65.923	16.9462	12.9252	6.59708	2.72565	0.792396	0.302633	0.315543	4.90553	0.257061	0.762716	0.510406	Q9DCJ5	sp|Q9DCJ5|NDUA8_MOUSE NADH dehydrogenase [ubiquinone] 1 alpha subcomplex subunit 8 OS=Mus musculus GN=Ndufa8 PE=1 SV=3	2e-07
KH.C3.750.v1.A.nonSL2-1	948	2463	1373	1218	791	744	4024	988	1263	830	29.4186	79.8811	39.2892	34.9942	24.1881	22.8337	114.389	31.5709	41.819	23.9562	2.71533	0.491846	0.890683	0.691204	5.00965	0.275996	1.3246	0.572855	Q6NYS8	sp|Q6NYS8|OST48_DANRE Dolichyl-diphosphooligosaccharide--protein glycosyltransferase 48 kDa subunit OS=Danio rerio GN=ddost PE=2 SV=2	6e-97
KH.S999.4.v1.A.SL1-1	52	135	216	251	265	30	100	97	154	320	2.84194	7.71102	10.8856	12.7005	14.2715	1.62152	5.00639	5.45884	8.98026	16.2663	2.71329	1.4117	1.16672	1.1237	3.08746	1.09037	1.64509	1.81134	Q5U220	sp|Q5U220|TM254_RAT Transmembrane protein 254 OS=Rattus norvegicus GN=Tmem254 PE=2 SV=1	0.002
KH.C3.461.v1.A.SL2-1	94	244	280	284	276	62	453	206	260	285	5.89055	15.9803	16.1799	16.4771	17.0431	3.84247	26.004	13.2927	17.3843	16.6111	2.71286	1.01249	1.01837	1.03435	6.76752	0.511179	1.30781	0.955523	C0R112	sp|C0R112|SYI_BRAHW Isoleucine--tRNA ligase OS=Brachyspira hyodysenteriae (strain ATCC 49526 / WA1) GN=ileS PE=3 SV=1	1
KH.L156.5.v1.A.SL1-1	183	475	419	315	366	138	484	186	232	343	12.3934	33.6202	26.1663	19.7509	24.4249	9.24293	30.0261	12.9709	16.7643	21.6053	2.71274	0.778293	0.754819	1.23665	3.24855	0.431988	1.29245	1.28877	Q9IB61	sp|Q9IB61|BLCAP_DANRE Bladder cancer-associated protein OS=Danio rerio GN=blcap PE=3 SV=1	6e-05
KH.C8.418.v1.A.SL2-1	46	119	80	159	212	24	210	102	165	195	0.997667	2.69737	1.59995	3.19272	4.53081	0.514789	4.17215	2.27795	3.81828	3.93358	2.70368	0.593152	1.99551	1.41911	8.10459	0.54599	1.67619	1.0302	Q6AYY8	sp|Q6AYY8|ACATN_RAT Acetyl-coenzyme A transporter 1 OS=Rattus norvegicus GN=Slc33a1 PE=2 SV=1	2e-84
KH.C8.397.v1.A.SL2-1	212	548	542	260	77	187	843	275	223	107	5.93274	16.0275	13.9865	6.7364	2.12335	5.17549	21.6103	7.92445	6.65857	2.78503	2.70154	0.872653	0.481638	0.315206	4.1755	0.366698	0.840256	0.418262	P47345	sp|P47345|GATA_MYCGE Glutamyl-tRNA(Gln) amidotransferase subunit A OS=Mycoplasma genitalium (strain ATCC 33530 / G-37 / NCTC 10195) GN=gatA PE=3 SV=1	7.7
KH.C9.382.v1.A.ND1-1	178	460	534	573	465	126	855	461	493	510	3.56686	9.63363	9.86724	10.6305	9.18186	2.49705	15.6944	9.51226	10.5407	9.50521	2.70087	1.02425	1.07736	0.863724	6.28519	0.606092	1.10812	0.901764	Q3TZM9	sp|Q3TZM9|ALG11_MOUSE GDP-Man:Man(3)GlcNAc(2)-PP-Dol alpha-1,2-mannosyltransferase OS=Mus musculus GN=Alg11 PE=2 SV=1	9e-83
KH.C5.46.v2.A.ND1-1	101	261	276	144	152	90	206	123	86	105	3.53634	9.55078	8.91107	4.66799	5.2443	3.11648	6.60712	4.4346	3.21282	3.41938	2.70076	0.93302	0.523841	1.12346	2.12006	0.671184	0.724491	1.06429	Q5VZY2	sp|Q5VZY2|PPC1A_HUMAN Phosphatidate phosphatase PPAPDC1A OS=Homo sapiens GN=PPAPDC1A PE=1 SV=2	7e-34
KH.C1.1023.v1.A.SL1-1	1179	3043	3498	2756	1533	918	4524	2281	1945	1662	21.8654	58.9808	59.8207	47.3214	28.0154	16.8374	76.8562	43.5597	38.4874	28.6682	2.69746	1.01424	0.791053	0.592025	4.5646	0.566769	0.883555	0.744871	Q5R8Y6	sp|Q5R8Y6|TM9S2_PONAB Transmembrane 9 superfamily member 2 OS=Pongo abelii GN=TM9SF2 PE=2 SV=1	1e-166
KH.L40.4.v1.A.SL1-1	200	516	461	224	81	157	618	205	164	85	10.3796	27.9877	22.0618	10.763	4.14237	8.05828	29.3801	10.9553	9.08139	4.10296	2.69641	0.788268	0.487858	0.38487	3.64596	0.37288	0.828952	0.451798	P70445	sp|P70445|4EBP2_MOUSE Eukaryotic translation initiation factor 4E-binding protein 2 OS=Mus musculus GN=Eif4ebp2 PE=2 SV=1	7e-15
KH.C2.593.v1.A.SL2-1	57	147	179	87	19	36	290	140	56	25	4.92844	13.2837	14.2717	6.96449	1.61883	3.07842	22.9692	12.4646	5.1663	2.01049	2.69531	1.07438	0.487992	0.23244	7.46136	0.542667	0.414476	0.389154	Q8BM85	sp|Q8BM85|TBCK_MOUSE TBC domain-containing protein kinase-like protein OS=Mus musculus GN=Tbck PE=2 SV=1	6.2
KH.L24.33.v1.A.nonSL3-1	181	466	518	296	237	109	634	208	241	268	13.4878	36.2923	35.5944	20.4216	17.403	8.03304	43.2778	15.9604	19.1618	18.5748	2.69075	0.980768	0.573731	0.852184	5.38748	0.368789	1.20059	0.969365	C4QM85	sp|C4QM85|TOR_SCHMA Tetraspanning orphan receptor OS=Schistosoma mansoni GN=TOR PE=2 SV=2	0.004
KH.C2.1149.v1.A.ND1-1	48	123	125	222	222	54	172	141	171	291	0.866776	2.32133	2.08144	3.71154	3.9503	0.964384	2.84516	2.62181	3.29472	4.88748	2.67812	0.896659	1.78316	1.06433	2.95024	0.921498	1.25666	1.48343	Q8YRI1	sp|Q8YRI1|YY46_NOSS1 Uncharacterized WD repeat-containing protein alr3466 OS=Nostoc sp. (strain PCC 7120 / UTEX 2576) GN=alr3466 PE=4 SV=1	1e-24
KH.C2.810.v1.A.SL1-1	385	984	1079	1327	1235	386	1029	694	1186	1302	9.58946	25.615	24.7824	30.6013	30.3119	9.50849	23.4781	17.7996	31.5192	30.1627	2.67116	0.967496	1.2348	0.990542	2.46917	0.758137	1.77078	0.956965	Q9QZI8	sp|Q9QZI8|SERC1_MOUSE Serine incorporator 1 OS=Mus musculus GN=Serinc1 PE=1 SV=1	2e-81
KH.S455.8.v1.B.SL1-1	412	1051	2483	1909	1578	303	1407	2019	1232	1379	4.80477	12.8099	26.7018	20.6118	18.134	3.49469	15.0308	24.2453	15.33	14.9577	2.66607	2.08447	0.771926	0.879788	4.30105	1.61304	0.632286	0.975715	P13993	sp|P13993|PRP2_SOYBN Repetitive proline-rich cell wall protein 2 OS=Glycine max GN=PRP2 PE=2 SV=1	2e-16
KH.C14.191.v3.A.nonSL9-1	104	265	235	119	54	78	265	105	84	66	3.97632	10.5891	8.28523	4.2124	2.03448	2.9494	9.28126	4.13384	3.42676	2.34703	2.66305	0.782428	0.508423	0.482974	3.14684	0.445397	0.828952	0.684911	Q28F55	sp|Q28F55|KAD2_XENTR Adenylate kinase 2, mitochondrial OS=Xenopus tropicalis GN=ak2 PE=2 SV=1	1e-58
KH.C9.871.v1.A.ND1-1	589	1488	1165	745	571	339	1623	576	735	648	16.6267	43.8996	30.3254	19.4708	15.8832	9.46415	41.9685	16.7429	22.1378	17.0134	2.6403	0.690789	0.642062	0.815749	4.43447	0.39894	1.32222	0.768524	B2KI79	sp|B2KI79|DOPP1_RHIFE Dolichyldiphosphatase 1 OS=Rhinolophus ferrumequinum GN=DOLPP1 PE=3 SV=1	1e-36
KH.C4.152.v1.A.SL2-1	103	260	309	406	400	73	515	297	497	438	4.25012	11.2125	11.7574	15.5105	16.2643	2.97905	19.4663	12.6194	21.8815	16.8099	2.63817	1.04859	1.31921	1.0486	6.53442	0.648265	1.73396	0.768223	Q5ZHV7	sp|Q5ZHV7|SPRY7_CHICK SPRY domain-containing protein 7 OS=Gallus gallus GN=SPRYD7 PE=2 SV=1	4e-23
KH.C4.526.v1.A.SL1-1	44	111	132	235	298	32	115	134	211	342	1.58467	4.17806	4.38378	7.8359	10.5758	1.13979	3.79399	4.96944	8.1082	11.4561	2.63655	1.04924	1.78748	1.34966	3.32867	1.30982	1.63161	1.41291
KH.C2.852.v1.A.SL2-1	1184	2980	2363	832	338	560	3481	976	1020	382	71.2399	187.393	131.106	46.3479	20.0401	33.3234	191.862	60.4697	65.4829	21.3777	2.63045	0.699633	0.353513	0.432385	5.75756	0.315173	1.0829	0.326462	P46436	sp|P46436|GST1_ASCSU Glutathione S-transferase 1 OS=Ascaris suum GN=GST1 PE=1 SV=3	8e-16
KH.C2.825.v1.A.SL1-1	340	855	1282	1041	675	368	963	743	667	665	6.14947	16.1618	21.3814	17.4319	12.0302	6.58259	15.955	13.8377	12.8718	11.1868	2.62817	1.32295	0.815284	0.690128	2.42382	0.867294	0.9302	0.869091	Q9PTL2	sp|Q9PTL2|SPY2_CHICK Protein sprouty homolog 2 OS=Gallus gallus GN=SPRY2 PE=2 SV=1	9e-12
KH.C13.165.v1.A.ND1-1	70	176	158	268	232	76	249	260	308	254	1.22169	3.21026	2.54277	4.33044	3.9899	1.31179	3.98083	4.67253	5.73547	4.12308	2.62773	0.792076	1.70304	0.921361	3.03465	1.17376	1.22749	0.718874	A9RA96	sp|A9RA96|SPB10_PAPAN Serpin B10 OS=Papio anubis GN=SERPINB10 PE=3 SV=1	7e-33
KH.C1.798.v1.A.SL1-1	177	445	455	525	509	175	499	269	312	661	3.98973	10.4833	9.45737	10.9563	11.3058	3.9012	10.3035	6.24366	7.5038	13.8579	2.62756	0.90214	1.1585	1.03189	2.6411	0.605976	1.20183	1.84679	Q3MHQ7	sp|Q3MHQ7|TM86A_BOVIN Lysoplasmalogenase-like protein TMEM86A OS=Bos taurus GN=TMEM86A PE=2 SV=1	2e-12
KH.C3.668.v1.C.ND1-1	41	103	117	148	114	17	130	97	125	139	2.45713	6.45131	6.46575	8.21186	6.73227	1.00759	7.13676	5.98595	7.99302	7.74792	2.62555	1.00224	1.27005	0.819823	7.083	0.838749	1.3353	0.969336	A8WFS8	sp|A8WFS8|PGAP3_DANRE Post-GPI attachment to proteins factor 3 OS=Danio rerio GN=pgap3 PE=2 SV=1	5e-24
KH.L119.27.v1.A.SL2-1	299	751	770	493	270	160	1087	348	478	319	15.3245	40.2272	36.391	23.3936	13.6361	8.11007	51.0337	18.3658	26.1396	15.2065	2.62503	0.904635	0.64284	0.582899	6.29263	0.359876	1.42327	0.581745	P38566	sp|P38566|HYALP_RABIT Hyaluronidase PH-20 OS=Oryctolagus cuniculus GN=SPAM1 PE=2 SV=2	2.8
KH.S1107.2.v2.B.nonSL5-1	198	497	508	292	71	125	494	231	211	103	13.1152	34.4059	31.0286	17.9072	4.63426	8.18862	29.9744	15.7557	14.9124	6.34561	2.62336	0.901841	0.577119	0.258793	3.66049	0.52564	0.946477	0.425524	Q5ZJR3	sp|Q5ZJR3|OSTC_CHICK Oligosaccharyltransferase complex subunit OSTC OS=Gallus gallus GN=OSTC PE=2 SV=1	2e-47
KH.C10.65.v1.A.SL2-2	53	133	143	134	139	52	186	116	98	126	1.95385	5.12427	4.86115	4.57356	5.04942	1.89587	6.28117	4.40341	3.85476	4.32027	2.62266	0.948652	0.940839	1.10404	3.31308	0.70105	0.875402	1.12076	Q7T2F6	sp|Q7T2F6|WSB1_DANRE WD repeat and SOCS box-containing protein 1 OS=Danio rerio GN=wsb1 PE=2 SV=1	3e-36
KH.L69.3.v1.A.ND1-1	228	572	459	397	326	135	662	259	301	368	8.44646	22.1463	15.6798	13.6165	11.9006	4.94611	22.4652	9.87999	11.8977	12.6798	2.62197	0.70801	0.868409	0.873985	4.542	0.43979	1.20422	1.06574	P55168	sp|P55168|CCNC_CHICK Cyclin-C OS=Gallus gallus GN=CCNC PE=2 SV=1	1e-73
KH.S1107.2.v2.B.nonSL19-1	189	473	512	331	76	129	520	233	192	105	12.5558	32.8405	31.3647	20.3585	4.97516	8.47544	31.6445	15.9388	13.6094	6.4878	2.61556	0.955062	0.649089	0.244378	3.73367	0.503682	0.853856	0.476714	Q7ZWJ3	sp|Q7ZWJ3|OSTC_DANRE Oligosaccharyltransferase complex subunit ostc OS=Danio rerio GN=ostc PE=2 SV=1	5e-46
KH.C10.31.v1.A.SL1-1	82	205	197	349	404	80	369	230	348	536	2.72374	7.11659	6.03402	10.7328	13.2235	2.62804	11.2277	7.86677	12.3335	16.5593	2.6128	0.847881	1.77871	1.23206	4.27227	0.700656	1.5678	1.34263	O35394	sp|O35394|PRAF1_RAT Prenylated Rab acceptor protein 1 OS=Rattus norvegicus GN=Rabac1 PE=1 SV=1	3e-15
KH.C2.136.v1.A.SL1-1	44	110	154	60	6	20	215	93	28	5	0.695573	1.81739	2.24491	0.878166	0.0934659	0.312688	3.11345	1.51387	0.472285	0.0735167	2.6128	1.23524	0.39118	0.106433	9.95706	0.486237	0.311971	0.155662	Q09143	sp|Q09143|CTR1_MOUSE High affinity cationic amino acid transporter 1 OS=Mus musculus GN=Slc7a1 PE=1 SV=1	2e-30
KH.L5.7.v1.A.ND1-1	46	115	116	138	64	43	143	72	108	102	1.45743	3.80798	3.38904	4.04804	1.99812	1.34738	4.1503	2.34898	3.65099	3.00577	2.6128	0.889985	1.19445	0.493603	3.08028	0.565979	1.55429	0.823277	Q6ICL3	sp|Q6ICL3|TNG2_HUMAN Transport and Golgi organization protein 2 homolog OS=Homo sapiens GN=TANGO2 PE=2 SV=1	4e-14
KH.L95.18.v1.A.nonSL6-1	62	155	145	98	29	48	215	54	76	53	4.07107	10.6369	8.77959	5.9577	1.87641	3.11709	12.9321	3.65113	5.3246	3.23682	2.6128	0.825389	0.678585	0.314955	4.14878	0.282331	1.45834	0.6079	P70583	sp|P70583|DUT_RAT Deoxyuridine 5'-triphosphate nucleotidohydrolase OS=Rattus norvegicus GN=Dut PE=2 SV=3	4e-42
KH.C9.341.v1.A.SL1-1	104	260	237	154	116	61	311	119	221	131	10.0468	26.2502	21.1121	13.7737	11.0424	5.82792	27.5212	11.8374	22.7794	11.7704	2.6128	0.804262	0.652407	0.801704	4.7223	0.430121	1.92435	0.516712	P0DJF2	sp|P0DJF2|PT117_MOUSE Protein PET117 homolog, mitochondrial OS=Mus musculus GN=Pet117 PE=3 SV=1	0.002
KH.S787.1.v1.A.SL1-1	169	422	632	1676	1596	186	742	663	949	1695	3.1627	8.25373	10.9063	29.0389	29.4318	3.44251	12.72	12.7762	18.9493	29.5031	2.60971	1.32138	2.66258	1.01353	3.69499	1.00442	1.48317	1.55694	O08586	sp|O08586|PTEN_MOUSE Phosphatidylinositol 3,4,5-trisphosphate 3-phosphatase and dual-specificity protein phosphatase PTEN OS=Mus musculus GN=Pten PE=1 SV=1	2e-71
KH.C3.384.v1.C.SL1-1	163	407	404	572	340	119	762	471	506	360	5.01702	13.0924	11.4664	16.3001	10.3122	3.6224	21.4846	14.9278	16.6175	10.3059	2.60959	0.875809	1.42155	0.632644	5.93104	0.694816	1.11319	0.620185	Q5ZJX5	sp|Q5ZJX5|TLDC1_CHICK TLD domain-containing protein 1 OS=Gallus gallus GN=TLDC1 PE=2 SV=1	3e-39
KH.L53.22.v1.C.ND1-1	127	317	259	220	141	97	430	127	201	161	5.13292	13.3902	9.65271	8.23225	5.61554	3.87724	15.92	5.28544	8.66788	6.05219	2.60869	0.72088	0.852843	0.682139	4.106	0.332001	1.63995	0.698231	Q9ES56	sp|Q9ES56|TPPC4_MOUSE Trafficking protein particle complex subunit 4 OS=Mus musculus GN=Trappc4 PE=1 SV=1	2e-55
KH.C2.415.v1.A.ND1-1	222	554	350	120	62	104	581	119	146	70	10.0986	26.338	14.6813	5.05386	2.77914	4.67876	24.2101	5.57405	7.08624	2.96163	2.60809	0.557418	0.344239	0.549904	5.17447	0.230237	1.27129	0.417941	Q0MQG8	sp|Q0MQG8|NDUS3_PANTR NADH dehydrogenase [ubiquinone] iron-sulfur protein 3, mitochondrial OS=Pan troglodytes GN=NDUFS3 PE=2 SV=1	8e-59
KH.C8.428.v1.A.SL1-1	57	142	124	107	84	48	165	67	100	88	1.1098	2.88951	2.22628	1.92881	1.61161	0.924276	2.94284	1.34326	2.07743	1.5936	2.60363	0.77047	0.86638	0.83555	3.18394	0.456451	1.54655	0.767101	Q6P6G5	sp|Q6P6G5|YIPF1_RAT Protein YIPF1 OS=Rattus norvegicus GN=Yipf1 PE=2 SV=1	1e-28
KH.C4.356.v1.A.SL6-1	43	107	96	97	38	32	168	81	78	54	2.00639	5.21792	4.13054	4.19039	1.7472	1.47668	7.18075	3.89179	3.88327	2.34351	2.60065	0.791608	1.01449	0.416954	4.86275	0.541975	0.997813	0.603488	Q9Y5Z4	sp|Q9Y5Z4|HEBP2_HUMAN Heme-binding protein 2 OS=Homo sapiens GN=HEBP2 PE=1 SV=1	9e-13
KH.C10.87.v1.A.SL3-1	41	102	68	83	57	28	172	62	84	52	1.6918	4.39876	2.58739	3.17086	2.31767	1.14265	6.50138	2.63434	3.69828	1.99569	2.60005	0.588209	1.22551	0.730926	5.68975	0.405198	1.40387	0.539627	Q8R1V4	sp|Q8R1V4|TMED4_MOUSE Transmembrane emp24 domain-containing protein 4 OS=Mus musculus GN=Tmed4 PE=2 SV=1	5e-61
KH.S1546.1.v1.A.ND1-1	85	211	217	169	99	70	168	106	117	125	5.14853	13.3571	12.1203	9.47734	5.90897	4.19327	9.32153	6.61131	7.56148	7.04208	2.59436	0.907402	0.78194	0.623484	2.22297	0.709251	1.14372	0.931309	Q6TEK3	sp|Q6TEK3|VKORL_RAT Vitamin K epoxide reductase complex subunit 1-like protein 1 OS=Rattus norvegicus GN=Vkorc1l1 PE=2 SV=1	3e-16
KH.L19.3.v3.A.SL1-1	67	166	143	65	33	48	218	60	63	32	6.02297	15.5959	11.8539	5.40984	2.92322	4.26744	17.9517	5.55397	6.04272	2.67554	2.5894	0.760065	0.456377	0.540353	4.20667	0.309384	1.088	0.442771	Q9UQ80	sp|Q9UQ80|PA2G4_HUMAN Proliferation-associated protein 2G4 OS=Homo sapiens GN=PA2G4 PE=1 SV=3	1e-20
KH.C7.526.v1.A.SL2-1	231	572	576	283	222	163	628	246	193	242	3.86482	10.0018	8.88646	4.38368	3.66001	2.69709	9.62477	4.23808	3.44533	3.76581	2.58792	0.888483	0.493299	0.834917	3.56857	0.440331	0.812946	1.09302	Q8WMN1	sp|Q8WMN1|GTR5_SHEEP Solute carrier family 2, facilitated glucose transporter member 5 OS=Ovis aries GN=SLC2A5 PE=2 SV=1	7e-48
KH.C2.895.v1.A.nonSL3-1	82	203	132	105	89	43	252	112	106	102	3.26179	8.43927	4.84178	3.86694	3.48855	1.69161	9.1824	4.58751	4.49888	3.77371	2.58731	0.573721	0.79866	0.902147	5.42819	0.499599	0.98068	0.838811	Q6GQA6	sp|Q6GQA6|CSN8_XENLA COP9 signalosome complex subunit 8 OS=Xenopus laevis GN=csn8 PE=2 SV=2	3e-11
KH.C6.133.v3.A.SL4-1	141	349	234	200	121	82	607	177	208	115	5.27088	13.635	8.06619	6.92196	4.45719	3.03157	20.7857	6.81324	8.29628	3.99841	2.58686	0.591579	0.858145	0.64392	6.85642	0.327784	1.21767	0.481952	Q64640	sp|Q64640|ADK_RAT Adenosine kinase OS=Rattus norvegicus GN=Adk PE=1 SV=3	1e-74
KH.C8.33.v1.A.SL4-1	158	391	280	105	68	117	390	106	89	80	3.44989	8.92259	5.63761	2.12262	1.46308	2.52653	7.80056	2.38326	2.07345	1.62467	2.58634	0.631835	0.376511	0.689281	3.08746	0.305524	0.870009	0.783555	P05120	sp|P05120|PAI2_HUMAN Plasminogen activator inhibitor 2 OS=Homo sapiens GN=SERPINB2 PE=1 SV=2	2e-27
KH.L124.9.v3.A.ND1-1	70	173	165	88	41	71	196	106	70	46	1.87552	4.84434	4.07658	2.18293	1.08248	1.88136	4.81052	2.92446	2.00114	1.14632	2.58294	0.841512	0.535482	0.495882	2.55694	0.60793	0.684277	0.572835	P53353	sp|P53353|ASPX_VULVU Sperm acrosomal protein FSA-ACR.1 (Fragment) OS=Vulpes vulpes PE=2 SV=1	0.0002
KH.S590.5.v1.A.SL3-1	96	237	215	169	163	68	295	125	166	207	4.16218	10.739	8.59562	6.78378	6.96385	2.91574	11.7162	5.58055	7.67917	8.34731	2.58014	0.80041	0.789214	1.02654	4.01824	0.476312	1.37606	1.08701	Q4R5V2	sp|Q4R5V2|EMC7_MACFA ER membrane protein complex subunit 7 OS=Macaca fascicularis GN=EMC7 PE=2 SV=1	2e-11
KH.C8.405.v1.A.nonSL11-1	56	138	124	68	44	40	173	53	87	57	3.08662	7.9495	6.30239	3.47007	2.38979	2.18044	8.73482	3.00806	5.11647	2.9221	2.57547	0.792803	0.550597	0.688685	4.00598	0.344376	1.70092	0.571117	P35244	sp|P35244|RFA3_HUMAN Replication protein A 14 kDa subunit OS=Homo sapiens GN=RPA3 PE=1 SV=1	0.007
KH.C3.517.v1.A.nonSL5-1	141	347	272	177	109	76	402	181	182	148	8.37261	21.5346	14.8936	9.73084	6.37794	4.46319	21.8666	11.0672	11.5311	8.1739	2.57203	0.691611	0.653357	0.655436	4.89931	0.506123	1.04192	0.708859	Q9VTY6	sp|Q9VTY6|UBE2C_DROME Ubiquitin-conjugating enzyme E2 C OS=Drosophila melanogaster GN=vih PE=1 SV=1	3e-22
KH.L55.1.v1.C.nonSL3-1	98	240	235	97	70	54	314	127	74	81	6.61713	16.9364	14.6319	6.06388	4.65751	3.60602	19.4217	8.83007	5.33128	5.08692	2.55948	0.863931	0.414429	0.768074	5.3859	0.454651	0.603764	0.954164	Q6B860	sp|Q6B860|RT14_BOVIN 28S ribosomal protein S14, mitochondrial OS=Bos taurus GN=MRPS14 PE=1 SV=1	1e-13
KH.C12.282.v1.A.SL2-1	332	812	928	489	265	238	1077	481	579	292	21.8633	55.8856	56.3527	29.8141	17.1963	15.5005	64.9691	32.6167	40.683	17.8849	2.55614	1.00836	0.529063	0.576785	4.19142	0.502034	1.24731	0.439616	Q09896	sp|Q09896|MPC1_SCHPO Probable mitochondrial pyruvate carrier 1 OS=Schizosaccharomyces pombe (strain 972 / ATCC 24843) GN=SPAC24B11.09 PE=3 SV=1	8e-21
KH.L40.8.v2.A.SL2-1	271	662	638	271	75	167	751	264	183	64	10.714	27.3531	23.259	9.91942	2.92183	6.52963	27.1979	10.7474	7.7195	2.35336	2.55302	0.850326	0.426476	0.294557	4.1653	0.395155	0.718268	0.304859	Q5ZJ06	sp|Q5ZJ06|MAGT1_CHICK Magnesium transporter protein 1 OS=Gallus gallus GN=MAGT1 PE=2 SV=1	1e-64
KH.C3.243.v1.C.SL1-1	876	2139	2187	1263	792	686	3101	1057	994	924	31.6499	80.7692	72.8629	42.2481	28.1972	24.5123	102.632	39.3243	38.3188	31.0504	2.55195	0.902112	0.57983	0.667419	4.18698	0.383157	0.974431	0.810317	A5GFS8	sp|A5GFS8|VAPB_PIG Vesicle-associated membrane protein-associated protein B OS=Sus scrofa GN=VAPB PE=3 SV=1	3e-33
KH.C6.143.v1.A.ND1-1	374	913	764	814	449	277	1618	649	904	590	22.4138	57.1849	42.2208	45.1652	26.5157	16.4178	88.8252	40.0503	57.8055	32.8869	2.55132	0.738321	1.06974	0.587082	5.4103	0.450889	1.44332	0.568923	P61210	sp|P61210|ARF1_LOCMI ADP-ribosylation factor 1 OS=Locusta migratoria GN=ARF1 PE=2 SV=2	2e-52
KH.C7.230.v2.A.SL2-1	743	1810	1474	602	159	504	1989	680	575	181	47.6816	121.397	87.2264	35.7679	10.0547	31.9877	116.926	44.9353	39.3718	10.8035	2.54599	0.718524	0.410058	0.281111	3.65533	0.384307	0.87619	0.274398	P16598	sp|P16598|IL1A_RAT Interleukin-1 alpha OS=Rattus norvegicus GN=Il1a PE=2 SV=1	0.3
KH.C2.579.v1.A.SL2-1	315	767	828	345	250	196	992	263	252	279	18.8282	47.9136	45.6369	19.092	14.7248	11.5863	54.3153	16.1871	16.0714	15.5106	2.54478	0.952484	0.418346	0.771254	4.6879	0.298022	0.992851	0.965102	Q16629	sp|Q16629|SRSF7_HUMAN Serine/arginine-rich splicing factor 7 OS=Homo sapiens GN=SRSF7 PE=1 SV=1	7e-21
KH.C10.54.v1.A.SL2-1	145	353	247	203	185	93	475	172	244	223	7.10988	18.0899	11.1681	9.21564	8.93878	4.50991	21.3354	8.6844	12.7656	10.1701	2.54433	0.617369	0.825174	0.969957	4.73079	0.407041	1.46994	0.796681	Q8JZY2	sp|Q8JZY2|COMDA_MOUSE COMM domain-containing protein 10 OS=Mus musculus GN=Commd10 PE=2 SV=1	2e-21
KH.C1.473.v1.A.ND1-1	75	182	192	70	20	47	170	67	41	18	2.11847	5.37279	5.00094	1.83061	0.556678	1.31296	4.3987	1.94874	1.23567	0.47289	2.53616	0.930792	0.366052	0.304095	3.35022	0.443026	0.634087	0.3827	P31308	sp|P31308|TPX_STRSA Probable thiol peroxidase OS=Streptococcus sanguis GN=tpx PE=1 SV=3	1.8
KH.S594.4.v2.B.SL2-1	183	444	408	228	237	164	729	249	201	280	6.25279	15.8552	12.855	7.21262	7.97964	5.54188	22.8173	8.7607	7.32783	8.89829	2.5357	0.810774	0.561075	1.10634	4.11724	0.383951	0.836443	1.21432	P98106	sp|P98106|LYAM3_RAT P-selectin OS=Rattus norvegicus GN=Selp PE=2 SV=1	2e-05
KH.C11.403.v1.A.SL1-1	106	257	370	492	502	57	184	281	336	452	1.64471	4.16757	5.29388	7.06779	7.67537	0.874679	2.61526	4.48959	5.56262	6.52301	2.53392	1.27026	1.33509	1.08596	2.98996	1.71669	1.239	1.17265	Q91ZN5	sp|Q91ZN5|S35B2_MOUSE Adenosine 3'-phospho 5'-phosphosulfate transporter 1 OS=Mus musculus GN=Slc35b2 PE=2 SV=1	6e-78
KH.C4.364.v1.A.SL2-1	99	240	229	468	436	107	395	283	379	557	2.62765	6.65749	5.60476	11.5004	11.4033	2.80871	9.6038	7.73457	10.7332	13.7504	2.53362	0.841874	2.0519	0.991556	3.41929	0.805365	1.38769	1.28111	P27545	sp|P27545|CERS1_MOUSE Ceramide synthase 1 OS=Mus musculus GN=Cers1 PE=1 SV=1	4e-41
KH.S404.1.v4.A.SL1-1	269	652	332	130	58	218	851	150	105	46	6.23407	15.7919	7.0949	2.78932	1.32452	4.99651	18.066	3.57954	2.59636	0.991524	2.53315	0.449276	0.393144	0.474855	3.61573	0.198137	0.725333	0.38189	Q17770	sp|Q17770|PDI2_CAEEL Protein disulfide-isomerase 2 OS=Caenorhabditis elegans GN=pdi-2 PE=1 SV=1	2e-88
KH.L95.3.v2.A.ND4-1	573	1386	1086	921	373	352	1807	483	787	474	24.6543	62.3257	43.088	36.6887	15.8146	14.9786	71.2212	21.3994	36.1301	18.9689	2.52799	0.691336	0.851483	0.431048	4.75487	0.300464	1.68837	0.525017	O88588	sp|O88588|PACS1_RAT Phosphofurin acidic cluster sorting protein 1 OS=Rattus norvegicus GN=Pacs1 PE=2 SV=1	9e-06
KH.L116.70.v1.A.SL1-1	194	469	664	776	1148	166	594	518	545	1070	5.11915	12.9341	16.1567	18.958	29.8504	4.33206	14.3581	14.0748	15.3444	26.2607	2.5266	1.24916	1.17338	1.57455	3.31437	0.980273	1.0902	1.71142	Q91554	sp|Q91554|ARGN2_XENLA Arginase, non-hepatic 2 OS=Xenopus laevis GN=arg2-b PE=2 SV=1	3e-45
KH.S164.24.v1.A.SL2-1	615	1485	1465	2729	1359	345	2074	890	3745	2025	33.9803	85.7522	74.6412	139.602	73.9918	18.8522	104.972	50.636	220.78	104.065	2.52358	0.87043	1.8703	0.530021	5.56817	0.482375	4.36015	0.471349	Q7NP43	sp|Q7NP43|CHLB_GLOVI Light-independent protochlorophyllide reductase subunit B OS=Gloeobacter violaceus (strain PCC 7421) GN=chlB PE=3 SV=1	3.6
KH.C2.816.v1.A.SL1-1	97	234	352	504	791	78	329	279	387	816	2.62532	6.61901	8.78501	12.6292	21.096	2.08783	8.1568	7.77556	11.1758	20.5413	2.52122	1.32724	1.43759	1.67041	3.90683	0.953261	1.4373	1.83801	Q28HF8	sp|Q28HF8|NTCP7_XENTR Sodium/bile acid cotransporter 7 OS=Xenopus tropicalis GN=slc10a7 PE=2 SV=1	8e-69
KH.C12.109.v1.A.SL1-1	61	147	175	155	89	55	164	105	123	103	2.1017	5.29327	5.55991	4.94433	3.02164	1.8741	5.17604	3.72518	4.5217	3.30068	2.51857	1.05037	0.889283	0.611132	2.76187	0.719696	1.21382	0.729964	Q0VFV7	sp|Q0VFV7|KCTD7_DANRE BTB/POZ domain-containing protein KCTD7 OS=Danio rerio GN=kctd7 PE=2 SV=2	3e-34
KH.C8.431.v1.A.ND1-1	50	120	165	381	372	53	195	255	293	410	0.772105	1.93666	2.34952	5.44711	5.66058	0.809417	2.75838	4.05474	4.82759	5.88865	2.50829	1.21318	2.31839	1.03919	3.40786	1.46997	1.1906	1.21979	Q1LUD1	sp|Q1LUD1|T168A_DANRE Transmembrane protein 168-A OS=Danio rerio GN=tmem168a PE=3 SV=1	8e-25
KH.C10.287.v1.B.ND1-1	133	319	597	929	1384	158	480	620	714	1312	1.32204	3.31397	5.47211	8.54954	13.5563	1.55324	4.37065	6.34601	7.57263	12.1297	2.50672	1.65123	1.56238	1.58561	2.81389	1.45196	1.19329	1.60179	O00512	sp|O00512|BCL9_HUMAN B-cell CLL/lymphoma 9 protein OS=Homo sapiens GN=BCL9 PE=1 SV=4	0.37
KH.C2.321.v1.A.SL6-1	78	187	267	254	581	64	179	146	179	486	1.88982	4.73514	5.9652	5.69762	13.8712	1.53354	3.97275	3.64246	4.62737	10.9518	2.50561	1.25977	0.955144	2.43455	2.59057	0.916861	1.2704	2.36675	Q8VI63	sp|Q8VI63|MOB2_MOUSE MOB kinase activator 2 OS=Mus musculus GN=Mob2 PE=2 SV=1	8e-31
KH.C2.1026.v1.A.SL1-1	63	151	263	302	139	92	201	149	150	154	0.660882	1.65549	2.54406	2.93309	1.43684	0.954468	1.93149	1.60948	1.67892	1.50255	2.50497	1.53674	1.15292	0.489874	2.02363	0.833286	1.04314	0.894951	Q9R0Z9	sp|Q9R0Z9|RHG07_MOUSE Rho GTPase-activating protein 7 OS=Mus musculus GN=Dlc1 PE=1 SV=2	1e-66
KH.C1.843.v1.A.nonSL14-1	43	103	76	51	36	26	163	48	60	67	1.34452	3.3659	2.19129	1.4764	1.10921	0.80401	4.66873	1.54545	2.00173	1.94849	2.50343	0.651027	0.673757	0.751293	5.8068	0.331022	1.29524	0.973404	Q2TBK2	sp|Q2TBK2|RM09_BOVIN 39S ribosomal protein L9, mitochondrial OS=Bos taurus GN=MRPL9 PE=2 SV=2	1.2
KH.C1.908.v1.A.SL2-1	188	450	363	230	147	136	592	186	217	228	11.7811	29.4718	20.976	13.3442	9.07731	8.42864	33.9831	12.0021	14.5092	13.2889	2.50162	0.711732	0.636162	0.680246	4.03186	0.353179	1.20889	0.915893	Q76I25	sp|Q76I25|HIG1C_MOUSE HIG1 domain family member 1C OS=Mus musculus GN=Higd1c PE=2 SV=1	0.42
KH.C4.420.v1.A.nonSL30-1	59	141	93	73	24	40	197	49	53	45	4.03185	10.0702	5.86036	4.61861	1.61613	2.70336	12.332	3.44799	3.86443	2.86017	2.49766	0.581951	0.788109	0.349917	4.56172	0.279598	1.12078	0.740127	P62309	sp|P62309|RUXG_MOUSE Small nuclear ribonucleoprotein G OS=Mus musculus GN=Snrpg PE=1 SV=1	4e-18
KH.L131.15.v1.A.SL1-1	436	1040	1032	537	276	231	1482	478	567	307	17.7165	44.1663	38.6687	20.2023	11.0513	9.28312	55.1636	20.0003	24.5828	11.6026	2.49295	0.875526	0.522445	0.547031	5.94236	0.362563	1.22912	0.471981	Q5XGC5	sp|Q5XGC5|PSMG2_XENTR Proteasome assembly chaperone 2 OS=Xenopus tropicalis GN=psmg2 PE=2 SV=1	4e-28
KH.S1354.2.v1.A.ND1-1	802	1913	2648	3077	2645	652	1862	2570	3226	2329	41.5747	103.642	126.579	147.679	135.112	33.4267	88.4194	137.184	178.433	112.292	2.49291	1.22131	1.16669	0.914903	2.64518	1.55152	1.30068	0.629325	P19560	sp|P19560|POL_BIV29 Gag-Pol polyprotein OS=Bovine immunodeficiency virus (strain R29) GN=gag-pol PE=1 SV=2	2.3
KH.L22.53.v2.A.nonSL5-2	198	472	286	95	50	107	505	144	94	66	8.0964	20.1713	10.784	3.59654	2.01469	4.32714	18.9161	6.06326	4.1012	2.51013	2.4914	0.534622	0.333506	0.560174	4.3715	0.320534	0.676402	0.612048	Q4PI89	sp|Q4PI89|SPT6_USTMA Transcription elongation factor SPT6 OS=Ustilago maydis (strain 521 / FGSC 9021) GN=SPT6 PE=3 SV=1	6.7
KH.C2.789.v2.A.ND1-2	86	205	232	124	98	70	303	83	155	88	3.17556	7.91119	7.89948	4.23915	3.56582	2.55629	10.2489	3.15585	6.10674	3.02225	2.49127	0.99852	0.536636	0.841165	4.00929	0.307921	1.93505	0.494904	Q8K2H6	sp|Q8K2H6|APC10_MOUSE Anaphase-promoting complex subunit 10 OS=Mus musculus GN=Anapc10 PE=2 SV=1	4e-30
KH.C9.529.v1.A.SL1-1	105	250	350	261	217	79	350	196	226	274	4.99186	12.4217	15.3437	11.4881	10.1659	3.71442	15.2424	9.59503	11.4641	12.1157	2.48838	1.23524	0.748719	0.884904	4.10359	0.629494	1.19479	1.05685	Q9QXK8	sp|Q9QXK8|NMU_MOUSE Neuromedin-U OS=Mus musculus GN=Nmu PE=2 SV=1	2.3
KH.C14.291.v1.A.SL1-1	113	269	235	125	145	93	292	155	89	90	1.91319	4.75991	3.66891	1.95941	2.41914	1.55723	4.52873	2.70227	1.60778	1.41726	2.48794	0.770794	0.534058	1.23462	2.90819	0.596695	0.594974	0.8815	Q9UI36	sp|Q9UI36|DACH1_HUMAN Dachshund homolog 1 OS=Homo sapiens GN=DACH1 PE=1 SV=3	2e-43
KH.L24.24.v1.A.SL1-1	177	421	484	279	196	98	623	200	190	184	22.9125	56.9569	57.774	33.4378	25.0015	12.5463	73.8753	26.6591	26.2427	22.1535	2.48585	1.01435	0.578769	0.747702	5.88823	0.360866	0.984381	0.844178	Q86VI4	sp|Q86VI4|LAP4B_HUMAN Lysosomal-associated transmembrane protein 4B OS=Homo sapiens GN=LAPTM4B PE=1 SV=1	0.014
KH.C3.657.v1.A.SL3-1	56	133	183	245	149	41	182	151	187	211	1.25853	3.12387	3.79241	5.09773	3.2997	0.911276	3.7468	3.49438	4.48408	4.41046	2.48216	1.21401	1.34419	0.647287	4.11159	0.93263	1.28323	0.983582	O95847	sp|O95847|UCP4_HUMAN Mitochondrial uncoupling protein 4 OS=Homo sapiens GN=SLC25A27 PE=1 SV=1	2e-65
KH.C14.66.v1.C.nonSL4-1	137	325	277	113	48	78	410	109	94	41	8.98274	22.2709	16.7478	6.85965	3.10128	5.05794	24.6255	7.35922	6.57616	2.50033	2.4793	0.752002	0.409586	0.452105	4.86869	0.298845	0.893595	0.380212	Q06758	sp|Q06758|HISJ_NEIGO Histidine-binding protein OS=Neisseria gonorrhoeae GN=hisJ PE=3 SV=1	6
KH.C2.209.v2.A.SL1-1	46	109	83	66	67	42	103	61	43	79	1.34634	3.33417	2.24007	1.78844	1.93233	1.21572	2.7615	1.83841	1.34283	2.15054	2.47648	0.671853	0.798385	1.08046	2.27149	0.665727	0.730429	1.6015	O94739	sp|O94739|CALM_PLEOS Calmodulin OS=Pleurotus ostreatus GN=CMD1 PE=2 SV=3	3e-10
KH.L14.1.v2.A.ND3-1	46	109	104	61	74	42	121	54	49	76	1.18686	2.93924	2.47437	1.45716	1.88142	1.07172	2.85983	1.43467	1.34894	1.82382	2.47648	0.84184	0.588902	1.29116	2.66845	0.501663	0.940247	1.35203	Q8WY64	sp|Q8WY64|MYLIP_HUMAN E3 ubiquitin-protein ligase MYLIP OS=Homo sapiens GN=MYLIP PE=1 SV=2	2e-21
KH.C4.305.v1.A.ND1-1	645	1525	1314	541	473	406	1870	508	402	504	17.7648	43.8972	33.3722	13.7954	12.8373	11.059	47.1797	14.4072	11.8136	12.9109	2.47102	0.760235	0.413379	0.930552	4.26617	0.30537	0.819977	1.09288	A7EGZ3	sp|A7EGZ3|MTNA_SCLS1 Methylthioribose-1-phosphate isomerase OS=Sclerotinia sclerotiorum (strain ATCC 18683 / 1980 / Ss-1) GN=mri1 PE=3 SV=1	4.6
KH.C3.727.v1.A.SL1-1	95	224	305	287	144	66	360	267	294	189	7.43381	18.319	22.0078	20.7924	11.1036	5.10766	25.805	21.5137	24.5466	13.7555	2.46428	1.20136	0.944775	0.53402	5.05221	0.833705	1.14097	0.560382	Q8IX29	sp|Q8IX29|FBX16_HUMAN F-box only protein 16 OS=Homo sapiens GN=FBXO16 PE=2 SV=1	0.025
KH.C10.33.v1.A.SL2-1	822	1935	1910	788	391	439	2543	809	758	455	29.9136	73.5943	64.0943	26.5496	14.0212	15.7998	84.7728	30.3153	29.4322	15.4005	2.46023	0.870913	0.414228	0.528114	5.36543	0.357607	0.970868	0.523253	P84173	sp|P84173|PHB_CHICK Prohibitin OS=Gallus gallus GN=PHB PE=1 SV=1	5e-70
KH.L60.2.v2.A.SL3-1	68	160	179	104	47	35	154	90	72	55	2.64	6.49205	6.40822	3.73821	1.79806	1.34386	5.47683	3.59795	2.98253	1.98602	2.45911	0.987088	0.583347	0.480996	4.07545	0.65694	0.828952	0.665886	Q9NY15	sp|Q9NY15|STAB1_HUMAN Stabilin-1 OS=Homo sapiens GN=STAB1 PE=1 SV=3	0.92
KH.C1.661.v1.A.SL1-1	54	127	254	776	626	68	160	285	413	670	1.00641	2.47372	4.3652	13.3899	11.4966	1.25337	2.73158	5.46944	8.21273	11.614	2.45797	1.76463	3.06743	0.858597	2.17938	2.0023	1.50157	1.41415	P50539	sp|P50539|MXI1_HUMAN Max-interacting protein 1 OS=Homo sapiens GN=MXI1 PE=1 SV=2	9e-13
KH.C7.328.v1.A.SL1-1	66	155	201	402	586	93	529	439	355	599	1.70873	4.19398	4.79858	9.63584	14.9499	2.38123	12.5458	11.7033	9.80648	14.4238	2.45445	1.14416	2.00806	1.55149	5.2686	0.932851	0.837921	1.47085	Q28262	sp|Q28262|PAFA_CANFA Platelet-activating factor acetylhydrolase OS=Canis familiaris GN=PLA2G7 PE=2 SV=1	8e-21
KH.L9.33.v1.A.nonSL13-1	46	108	77	34	20	26	126	23	25	25	4.05472	9.94931	6.25868	2.77471	1.73718	2.26656	10.1739	2.0876	2.35125	2.0496	2.45376	0.629056	0.443338	0.626077	4.48869	0.205192	1.12629	0.871705	Q4H3N8	sp|Q4H3N8|ENY2_CIOIN Transcription and mRNA export factor ENY2 OS=Ciona intestinalis GN=ENY2 PE=3 SV=1	7e-41
KH.C2.415.v1.A.nonSL16-1	240	563	371	143	64	102	539	141	172	82	10.6189	26.034	15.1366	5.85784	2.79035	4.46331	21.8458	6.42395	8.11991	3.37447	2.45168	0.581418	0.386998	0.476344	4.89453	0.294059	1.26401	0.41558	P23709	sp|P23709|NDUS3_BOVIN NADH dehydrogenase [ubiquinone] iron-sulfur protein 3, mitochondrial OS=Bos taurus GN=NDUFS3 PE=1 SV=1	2e-56
KH.C11.62.v1.A.SL1-1	488	1144	1192	1035	405	380	1669	540	950	612	15.2798	37.436	34.4162	30.0036	12.4958	11.7672	47.8704	17.4104	31.7379	17.8228	2.45004	0.919333	0.871787	0.416477	4.06814	0.363698	1.82293	0.561562	Q8U3Y2	sp|Q8U3Y2|GYAR_PYRFU Glyoxylate reductase OS=Pyrococcus furiosus (strain ATCC 43587 / DSM 3638 / JCM 8422 / Vc1) GN=gyaR PE=3 SV=1	4e-05
KH.C2.1130.v1.A.SL1-1	134	314	163	8	0	47	207	34	2	0	5.06351	12.4006	5.67968	0.27988	0	1.75645	7.16524	1.32295	0.0806368	0	2.44901	0.458016	0.0492775	0	4.07939	0.184634	0.0609524	0	Q6AXV9	sp|Q6AXV9|GSTO2_RAT Glutathione S-transferase omega-2 OS=Rattus norvegicus GN=Gsto2 PE=2 SV=1	8e-17
KH.L156.7.v1.A.SL1-1	103	241	229	305	352	99	313	212	222	350	4.54837	11.1225	9.32488	12.4696	15.317	4.32359	12.6612	9.63988	10.4599	14.3752	2.44538	0.83838	1.33724	1.22834	2.92841	0.761369	1.08507	1.37431	Q7T3H7	sp|Q7T3H7|MED18_DANRE Mediator of RNA polymerase II transcription subunit 18 OS=Danio rerio GN=med18 PE=2 SV=1	3e-18
KH.S621.8.v1.A.SL1-1	1040	2432	2628	1723	1188	695	3162	1381	1207	1153	21.35	52.1788	49.7483	32.748	24.0321	14.1104	59.4619	29.1927	26.4379	22.015	2.44397	0.95342	0.658273	0.733851	4.21405	0.490948	0.905635	0.832706	Q9Z2F5	sp|Q9Z2F5|CTBP1_RAT C-terminal-binding protein 1 OS=Rattus norvegicus GN=Ctbp1 PE=1 SV=3	4e-97
KH.C4.557.v1.A.nonSL3-1	74	173	171	221	220	68	276	172	221	204	2.24563	5.4868	4.7851	6.20918	6.57872	2.04083	7.67236	5.37467	7.15575	5.75788	2.44332	0.872113	1.29761	1.05952	3.75944	0.700524	1.33138	0.804651	P53609	sp|P53609|PGTB1_HUMAN Geranylgeranyl transferase type-1 subunit beta OS=Homo sapiens GN=PGGT1B PE=1 SV=2	3e-76
KH.C2.923.v1.A.SL1-1	91	212	245	380	343	91	380	284	348	429	2.97256	7.23756	7.3798	11.4923	11.0407	2.93983	11.3707	9.55268	12.129	13.0339	2.43479	1.01965	1.55727	0.960699	3.86781	0.840114	1.2697	1.0746	Q5PPK9	sp|Q5PPK9|TSSC1_RAT Protein TSSC1 OS=Rattus norvegicus GN=Tssc1 PE=2 SV=1	1e-62
KH.C7.419.v1.A.SL1-1	128	298	276	389	338	104	420	241	265	296	4.41348	10.7387	8.77544	12.4181	11.4842	3.54646	13.2658	8.55667	9.74929	9.49267	2.43317	0.817176	1.4151	0.924792	3.74058	0.645017	1.13938	0.973678	Q8R3G1	sp|Q8R3G1|PP1R8_MOUSE Nuclear inhibitor of protein phosphatase 1 OS=Mus musculus GN=Ppp1r8 PE=1 SV=1	4e-54
KH.L5.12.v1.A.SL4-1	110	256	209	147	89	74	279	101	125	104	3.80151	9.24634	6.66038	4.70345	3.03086	2.52922	8.83245	3.5942	4.60925	3.3429	2.43228	0.720326	0.706183	0.644391	3.49217	0.406931	1.28241	0.725259	A7SE07	sp|A7SE07|NUBP2_NEMVE Cytosolic Fe-S cluster assembly factor NUBP2 homolog OS=Nematostella vectensis GN=v1g229988 PE=3 SV=1	2e-63
KH.C4.12.v1.A.ND2-1	304	705	517	440	294	215	1262	399	303	268	5.53592	13.4175	8.68151	7.41829	5.27564	3.87208	21.0518	7.48179	5.88728	4.53917	2.42372	0.647029	0.854493	0.711167	5.4368	0.3554	0.786881	0.771013	Q2KJI2	sp|Q2KJI2|STT3A_BOVIN Dolichyl-diphosphooligosaccharide--protein glycosyltransferase subunit STT3A OS=Bos taurus GN=STT3A PE=2 SV=1	0
KH.C1.996.v1.A.nonSL4-1	82	190	201	154	203	52	293	111	103	177	1.9533	4.73016	4.4151	3.39634	4.76501	1.22504	6.39347	2.72267	2.61788	3.92153	2.42162	0.933394	0.769256	1.40298	5.219	0.425852	0.96151	1.49798	Q91V01	sp|Q91V01|MBOA5_MOUSE Lysophospholipid acyltransferase 5 OS=Mus musculus GN=Lpcat3 PE=1 SV=1	9e-42
KH.C14.284.v1.A.SL1-1	334	772	821	476	197	238	1072	527	447	238	10.9975	26.5663	24.9276	14.5108	6.39184	7.75024	32.3337	17.868	15.7041	7.28871	2.41567	0.938315	0.582117	0.44049	4.17196	0.552611	0.878894	0.464129	Q9Z142	sp|Q9Z142|TMM33_RAT Transmembrane protein 33 OS=Rattus norvegicus GN=Tmem33 PE=2 SV=1	2e-23
KH.L95.12.v1.A.SL1-1	90	208	328	286	366	103	553	277	281	453	2.81605	6.80185	9.46369	8.28512	11.2847	3.18732	15.8502	8.92472	9.38124	13.1832	2.41539	1.39134	0.875465	1.36205	4.97291	0.563065	1.05115	1.40528	P13686	sp|P13686|PPA5_HUMAN Tartrate-resistant acid phosphatase type 5 OS=Homo sapiens GN=ACP5 PE=1 SV=3	9e-46
KH.C2.311.v1.A.SL5-1	129	298	191	176	177	81	504	161	193	195	5.9216	14.2966	8.08484	7.47992	8.00635	3.67726	21.193	7.61013	9.45285	8.32549	2.41431	0.565509	0.925179	1.07038	5.76326	0.359086	1.24214	0.880738	Q3T0D8	sp|Q3T0D8|LTOR1_BOVIN Ragulator complex protein LAMTOR1 OS=Bos taurus GN=LAMTOR1 PE=2 SV=1	4.4
KH.L88.1.v1.A.ND1-1	71	164	281	453	411	83	223	396	284	497	0.85896	2.0736	3.1348	5.07397	4.89969	0.993077	2.47134	4.93317	3.66597	5.59238	2.41408	1.51177	1.6186	0.965651	2.48857	1.99615	0.743126	1.52548	Q13489	sp|Q13489|BIRC3_HUMAN Baculoviral IAP repeat-containing protein 3 OS=Homo sapiens GN=BIRC3 PE=1 SV=2	3e-12
KH.C4.665.v1.A.ND1-1	91	210	191	224	149	64	286	198	194	153	3.06539	7.39315	5.93289	6.98598	4.94586	2.13213	8.82517	6.86793	6.97272	4.7936	2.41182	0.802485	1.1775	0.70797	4.13913	0.778221	1.01526	0.687479	Q5BLX8	sp|Q5BLX8|WDR83_RAT WD repeat domain-containing protein 83 OS=Rattus norvegicus GN=Wdr83 PE=1 SV=1	6e-75
KH.C3.132.v2.A.nonSL12-1	322	743	672	472	64	235	663	333	400	139	23.4548	56.5628	45.1371	31.8312	4.59376	16.9291	44.2387	24.9768	31.088	9.41709	2.41157	0.798	0.705211	0.144316	2.61317	0.564592	1.24467	0.302918	Q8I7Z2	sp|Q8I7Z2|DAD1_ARAVE Dolichyl-diphosphooligosaccharide--protein glycosyltransferase subunit DAD1 OS=Araneus ventricosus GN=DAD1 PE=2 SV=1	6e-26
KH.C1.520.v1.A.ND1-1	514	1185	1442	759	80	140	603	286	254	55	33.4596	80.6198	86.5588	45.744	5.13167	9.01313	35.9573	19.1708	17.642	3.33001	2.40947	1.07367	0.528473	0.112182	3.98944	0.533154	0.920253	0.188755	O93274	sp|O93274|FZD8_XENLA Frizzled-8 OS=Xenopus laevis GN=fzd8 PE=1 SV=1	5e-14
KH.C8.564.v1.A.SL1-1	61	140	209	144	46	34	139	68	97	47	4.84016	11.6098	15.292	10.5786	3.59666	2.66808	10.1032	5.55592	8.21218	3.4686	2.39864	1.31717	0.691771	0.339995	3.78668	0.549918	1.47809	0.422373	P49789	sp|P49789|FHIT_HUMAN Bis(5'-adenosyl)-triphosphatase OS=Homo sapiens GN=FHIT PE=1 SV=3	5e-29
KH.L155.7.v1.A.SL1-1	897	2058	1810	1259	869	681	3527	1214	953	893	17.1769	41.1873	31.9609	22.3209	16.3977	12.897	61.8686	23.938	19.4716	15.9048	2.39783	0.775989	0.698383	0.734634	4.79713	0.386916	0.813418	0.816823	O00548	sp|O00548|DLL1_HUMAN Delta-like protein 1 OS=Homo sapiens GN=DLL1 PE=2 SV=2	9e-70
KH.C8.502.v1.A.SL1-1	58	133	137	260	285	51	188	167	205	278	1.72542	4.13508	3.75816	7.16102	8.35455	1.50047	5.12315	5.11564	6.50694	7.69196	2.39657	0.908849	1.90546	1.16667	3.41437	0.998533	1.27197	1.18212	Q66H07	sp|Q66H07|FANK1_RAT Fibronectin type 3 and ankyrin repeat domains 1 protein OS=Rattus norvegicus GN=Fank1 PE=2 SV=1	1e-43
KH.C11.368.v1.A.SL1-1	227	520	764	770	99	142	479	466	441	130	20.4062	48.8546	63.3312	64.0858	8.76966	12.6245	39.4443	43.1359	42.2991	10.8694	2.39411	1.29632	1.01191	0.136843	3.12442	1.09359	0.980601	0.256965	Q9BU79	sp|Q9BU79|TM243_HUMAN Transmembrane protein 243 OS=Homo sapiens GN=TMEM243 PE=1 SV=1	2e-17
KH.L22.35.v1.C.SL2-1	91	208	217	193	148	70	326	183	125	177	2.49876	5.96914	5.49453	4.90653	4.00457	1.90095	8.19999	5.17428	3.66226	4.52045	2.38885	0.92049	0.892985	0.816171	4.31362	0.631011	0.70778	1.23433	Q568Z6	sp|Q568Z6|IST1_RAT IST1 homolog OS=Rattus norvegicus GN=Ist1 PE=2 SV=1	8e-31
KH.C11.46.v1.A.SL3-1	85	194	300	220	195	66	262	167	224	211	2.81102	6.70523	9.14862	6.73602	6.35466	2.15864	7.93707	5.68695	7.90406	6.49014	2.38533	1.3644	0.736288	0.943384	3.67689	0.716504	1.38986	0.821115	Q6P823	sp|Q6P823|H33_XENTR Histone H3.3 OS=Xenopus tropicalis GN=TGas113e22.1 PE=1 SV=3	6e-61
KH.C12.135.v1.A.ND2-1	68	155	182	215	107	82	210	212	163	86	1.38032	3.28829	3.40669	4.0406	2.14027	1.64618	3.90485	4.43124	3.53034	1.62367	2.38226	1.03601	1.18608	0.52969	2.37207	1.1348	0.796693	0.459918	Q6P3Y9	sp|Q6P3Y9|PONL1_MOUSE Podocan-like protein 1 OS=Mus musculus GN=Podnl1 PE=2 SV=2	3e-11
KH.C3.259.v1.A.SL1-1	68	155	269	298	178	54	239	148	276	215	5.31187	12.6542	19.3767	21.5521	13.7016	4.17179	17.1021	11.9047	23.004	15.6208	2.38226	1.53124	1.11227	0.635741	4.09946	0.696093	1.93235	0.679046	Q6XJU9	sp|Q6XJU9|OSTF1_MONAL Osteoclast-stimulating factor 1 OS=Monopterus albus GN=ostf1 PE=2 SV=1	1e-22
KH.C11.46.v1.A.nonSL24-1	65	148	175	154	125	68	186	111	152	178	2.41985	5.75842	6.00762	5.30801	4.58562	2.50366	6.3431	4.25516	6.03776	6.16342	2.37966	1.04328	0.883546	0.863905	2.53353	0.670832	1.41893	1.02081	Q6P823	sp|Q6P823|H33_XENTR Histone H3.3 OS=Xenopus tropicalis GN=TGas113e22.1 PE=1 SV=3	2e-39
KH.C4.580.v1.A.ND1-1	145	330	391	399	276	121	421	319	315	312	3.79303	9.02191	9.43157	9.66332	7.11442	3.13036	10.0882	8.59263	8.79195	7.591	2.37855	1.04541	1.02457	0.736229	3.2227	0.85175	1.0232	0.863403	Q9BX70	sp|Q9BX70|BTBD2_HUMAN BTB/POZ domain-containing protein 2 OS=Homo sapiens GN=BTBD2 PE=1 SV=1	2e-128
KH.S1251.4.v2.A.ND1-1	62	141	174	147	86	58	137	79	60	65	3.17406	7.54412	8.21412	6.96748	4.33844	2.93658	6.42476	4.16454	3.27741	3.09501	2.37681	1.08881	0.848232	0.62267	2.18784	0.648202	0.78698	0.944347	Q503B7	sp|Q503B7|B9D1_DANRE B9 domain-containing protein 1 OS=Danio rerio GN=b9d1 PE=2 SV=1	2e-55
KH.L158.3.v1.A.SL2-1	245	557	455	313	312	198	802	265	274	330	5.91067	14.044	10.1221	6.99118	7.41715	4.72418	17.7239	6.58315	7.05306	7.40475	2.37605	0.72074	0.690684	1.06093	3.75173	0.371428	1.07138	1.04986	P78364	sp|P78364|PHC1_HUMAN Polyhomeotic-like protein 1 OS=Homo sapiens GN=PHC1 PE=1 SV=3	2e-11
KH.S404.1.v1.A.nonSL30-1	180	409	212	81	31	136	548	99	58	36	4.26755	10.1343	4.63479	1.77798	0.724235	3.18886	11.9014	2.41689	1.4672	0.793842	2.37474	0.457336	0.383615	0.407337	3.7322	0.203076	0.607061	0.541058	Q17770	sp|Q17770|PDI2_CAEEL Protein disulfide-isomerase 2 OS=Caenorhabditis elegans GN=pdi-2 PE=1 SV=1	3e-77
KH.C4.516.v2.A.nonSL11-1	96	218	149	70	36	75	432	105	55	37	1.91776	4.55141	2.74472	1.29466	0.70866	1.48175	7.90533	2.15988	1.17231	0.687466	2.37329	0.603049	0.471692	0.54737	5.33513	0.273218	0.542766	0.58642	Q3SZZ2	sp|Q3SZZ2|XBP1_BOVIN X-box-binding protein 1 OS=Bos taurus GN=XBP1 PE=2 SV=1	1e-08
KH.L119.14.v1.A.nonSL2-1	1904	4319	4401	3176	2573	1224	4969	2500	3345	2791	93.6642	222.053	199.64	144.651	124.726	59.5496	223.918	126.638	175.574	127.7	2.37073	0.899064	0.724562	0.862256	3.76019	0.565555	1.38642	0.727333	B2GJ15	sp|B2GJ15|RLMN_KOCRD Probable dual-specificity RNA methyltransferase RlmN OS=Kocuria rhizophila (strain ATCC 9341 / DSM 348 / NBRC 103217 / DC2201) GN=rlmN PE=3 SV=1	0.16
KH.C2.981.v1.A.SL2-1	56	127	122	101	105	42	105	67	134	108	2.24134	5.31239	4.50265	3.74263	4.14115	1.66249	3.84966	2.76129	5.72244	4.0204	2.37018	0.847576	0.831205	1.10648	2.3156	0.717281	2.07238	0.702568	Q9GKT2	sp|Q9GKT2|FXDC2_MACFA Fatty acid hydroxylase domain-containing protein 2 OS=Macaca fascicularis GN=FAXDC2 PE=2 SV=1	3e-16
KH.C3.132.v2.A.nonSL6-1	341	773	700	467	77	266	713	322	363	105	23.9531	56.7482	45.3412	30.371	5.32978	18.479	45.8785	23.2905	27.2063	6.85996	2.36914	0.79899	0.669831	0.175489	2.48274	0.507657	1.16813	0.252146	Q8I7Z2	sp|Q8I7Z2|DAD1_ARAVE Dolichyl-diphosphooligosaccharide--protein glycosyltransferase subunit DAD1 OS=Araneus ventricosus GN=DAD1 PE=2 SV=1	9e-30
KH.C7.665.v1.C.SL1-1	2592	5869	5917	2288	787	1403	6650	2189	2060	1046	104.947	248.351	220.916	85.7684	31.3995	56.1803	246.644	91.2639	88.9938	39.3907	2.36644	0.889529	0.388241	0.366096	4.39022	0.370022	0.975126	0.442623	P99026	sp|P99026|PSB4_MOUSE Proteasome subunit beta type-4 OS=Mus musculus GN=Psmb4 PE=1 SV=1	5e-57
KH.L152.31.v1.A.SL1-1	187	423	488	327	227	164	544	298	254	262	6.00456	14.1953	14.4493	9.72125	7.18252	5.20803	16.0012	9.85309	8.70221	7.82468	2.36409	1.01789	0.672782	0.738848	3.0724	0.615774	0.883196	0.89916	Q6NV04	sp|Q6NV04|ILVBL_DANRE Acetolactate synthase-like protein OS=Danio rerio GN=ilvbl PE=2 SV=1	2e-57
KH.C12.607.v1.C.SL1-1	140	316	390	468	435	137	388	333	427	505	3.7137	8.76056	9.53964	11.4937	11.3705	3.59409	9.42808	9.09577	12.0854	12.4594	2.35899	1.08893	1.20484	0.989282	2.62322	0.964753	1.32869	1.03094	P16260	sp|P16260|GDC_HUMAN Graves disease carrier protein OS=Homo sapiens GN=SLC25A16 PE=1 SV=3	1e-57
KH.C9.548.v1.A.SL1-1	71	160	111	63	71	51	139	62	53	87	3.53495	8.32551	5.09609	2.90403	3.48333	2.51122	6.33947	3.17858	2.81551	4.02875	2.3552	0.612105	0.569854	1.19948	2.52445	0.501396	0.885775	1.43091	Q5REG4	sp|Q5REG4|DTX3_PONAB Probable E3 ubiquitin-protein ligase DTX3 OS=Pongo abelii GN=DTX3 PE=2 SV=1	7e-30
KH.S2406.1.v1.B.SL2-1	174	392	243	78	24	124	392	105	49	38	15.7985	37.1979	20.3451	6.55685	2.14728	11.1347	32.6036	9.81684	4.74699	3.20904	2.35452	0.546944	0.322281	0.327486	2.92811	0.301097	0.483555	0.676016	P12791	sp|P12791|CP2BA_MOUSE Cytochrome P450 2B10 OS=Mus musculus GN=Cyp2b10 PE=1 SV=1	4e-08
KH.C7.4.v1.C.ND3-1	48	108	122	81	37	34	149	107	42	25	1.34243	3.15676	3.1463	2.09735	1.01968	0.940417	3.81725	3.08143	1.25331	0.650305	2.35152	0.996687	0.66661	0.486176	4.0591	0.807237	0.406729	0.518872	Q8R0M8	sp|Q8R0M8|MOT5_MOUSE Monocarboxylate transporter 5 OS=Mus musculus GN=Slc16a4 PE=2 SV=1	0.021
KH.C1.373.v1.A.SL1-1	80	180	168	441	477	56	278	302	424	527	1.854	4.35972	3.59019	9.46223	10.8931	1.28351	5.90171	7.20681	10.4844	11.3594	2.35152	0.823492	2.63558	1.15122	4.59811	1.22114	1.45478	1.08346	P25048	sp|P25048|DNRJ_STRPE Daunorubicin biosynthesis sensory transduction protein DnrJ OS=Streptomyces peucetius GN=dnrJ PE=3 SV=1	2.1
KH.C1.355.v1.R.ND1-1	662	1489	1511	563	260	356	1844	519	482	351	27.4664	64.5661	57.8092	21.6266	10.6299	14.6078	70.0838	22.1732	21.3377	13.5449	2.35073	0.895349	0.374102	0.491521	4.79771	0.316381	0.962319	0.634789	P42026	sp|P42026|NDUS7_BOVIN NADH dehydrogenase [ubiquinone] iron-sulfur protein 7, mitochondrial OS=Bos taurus GN=NDUFS7 PE=1 SV=1	1e-50
KH.C1.1103.v1.A.SL1-1	312	701	763	772	669	222	1064	620	671	758	10.4016	24.4248	23.4563	23.8286	21.9778	7.31965	32.4939	21.2841	23.8685	23.504	2.34817	0.960349	1.01587	0.922328	4.43927	0.655019	1.12143	0.984728	Q9NYZ1	sp|Q9NYZ1|TV23B_HUMAN Golgi apparatus membrane protein TVP23 homolog B OS=Homo sapiens GN=TVP23B PE=1 SV=2	1e-34
KH.C8.405.v1.A.nonSL4-1	50	112	119	70	35	30	151	55	78	52	2.94968	6.90541	6.47353	3.8233	2.03463	1.75032	8.1601	3.34106	4.90971	2.85321	2.34107	0.937457	0.590605	0.532166	4.66207	0.409439	1.46951	0.581137	P35244	sp|P35244|RFA3_HUMAN Replication protein A 14 kDa subunit OS=Homo sapiens GN=RPA3 PE=1 SV=1	0.005
KH.C8.604.v1.A.SL1-1	67	150	134	121	88	41	235	111	121	82	2.16209	5.05891	3.98743	3.6151	2.7983	1.3085	6.94673	3.68841	4.16621	2.46116	2.33982	0.788199	0.906623	0.774059	5.30893	0.530956	1.12954	0.590742	O95295	sp|O95295|SNAPN_HUMAN SNARE-associated protein Snapin OS=Homo sapiens GN=SNAPIN PE=1 SV=1	6e-11
KH.S390.8.v1.A.SL1-1	118	264	455	861	1531	130	306	494	589	1412	2.77151	6.48044	9.85449	18.7229	35.4341	3.01973	6.58368	11.9475	14.7607	30.8457	2.33823	1.52065	1.89993	1.89256	2.18022	1.81472	1.23546	2.08972	Q9GM70	sp|Q9GM70|ST17A_RABIT Serine/threonine-protein kinase 17A OS=Oryctolagus cuniculus GN=STK17A PE=2 SV=1	2e-56
KH.C9.362.v2.A.SL2-1	97	217	294	265	229	96	279	124	128	198	1.82054	4.25652	5.08821	4.60479	4.23522	1.78193	4.79674	2.39645	2.56328	3.45637	2.33805	1.19539	0.904992	0.919743	2.69188	0.499599	1.06962	1.34842	Q6RUV5	sp|Q6RUV5|RAC1_RAT Ras-related C3 botulinum toxin substrate 1 OS=Rattus norvegicus GN=Rac1 PE=1 SV=1	5e-78
KH.C12.114.v3.A.ND2-1	165	369	450	404	240	120	477	286	424	381	9.02859	21.1022	22.7058	20.4669	12.9407	6.49393	23.9093	16.1146	24.7547	19.3904	2.33727	1.07599	0.901395	0.632276	3.6818	0.673987	1.53617	0.783301	P35129	sp|P35129|UBC2_CAEEL Ubiquitin-conjugating enzyme E2 2 OS=Caenorhabditis elegans GN=let-70 PE=1 SV=1	3e-51
KH.S590.2.v1.A.SL3-1	354	791	957	468	138	243	907	392	342	145	22.75	53.1276	56.7124	27.8457	8.73913	15.4445	53.3946	25.9406	23.4509	8.66705	2.33528	1.06748	0.490999	0.313841	3.45719	0.485828	0.904023	0.369583	Q62760	sp|Q62760|TOM20_RAT Mitochondrial import receptor subunit TOM20 homolog OS=Rattus norvegicus GN=Tomm20 PE=1 SV=2	4e-26
KH.C2.67.v1.A.ND1-1	52	116	138	181	179	29	156	104	181	345	2.1916	5.10954	5.36322	7.06271	7.434	1.20878	6.02276	4.51344	8.13941	13.5239	2.33142	1.04965	1.31688	1.05257	4.98252	0.749398	1.80337	1.66154	Q9W0Y2	sp|Q9W0Y2|YS11_DROME Putative gamma-glutamylcyclotransferase CG2811 OS=Drosophila melanogaster GN=CG2811 PE=2 SV=2	1e-10
KH.C5.207.v1.A.SL1-1	113	252	253	297	173	68	418	229	249	193	3.83211	8.93154	7.91169	9.32506	5.7812	2.28065	12.9852	7.99673	9.00981	6.08756	2.33071	0.885814	1.17864	0.619964	5.69364	0.615833	1.12669	0.675659	Q5M7X9	sp|Q5M7X9|MUL1A_DANRE Mitochondrial ubiquitin ligase activator of nfkb 1-A OS=Danio rerio GN=mul1a PE=2 SV=1	4e-11
KH.S545.6.v1.A.SL1-1	197	439	507	392	572	131	702	320	400	639	11.7441	27.3516	27.8708	21.6359	33.6017	7.72351	38.3357	19.6435	25.443	35.4307	2.32897	1.01898	0.776291	1.55305	4.96351	0.512409	1.29524	1.39255	Q5BJT4	sp|Q5BJT4|TXD15_RAT Thioredoxin domain-containing protein 15 OS=Rattus norvegicus GN=Txndc15 PE=2 SV=1	1e-06
KH.C10.15.v1.A.SL3-1	106	236	241	162	185	102	428	129	130	195	4.17977	9.72578	8.76299	5.91421	7.18836	3.97774	15.4598	5.23785	5.46948	7.15166	2.32687	0.901006	0.674908	1.21544	3.88657	0.338805	1.04422	1.30756	Q9NV29	sp|Q9NV29|TM100_HUMAN Transmembrane protein 100 OS=Homo sapiens GN=TMEM100 PE=2 SV=2	7
KH.C5.407.v2.A.SL1-2	168	374	307	95	91	105	405	94	85	94	9.75845	22.7044	16.4437	5.10894	5.20865	6.03186	21.5496	5.62233	5.26801	5.07838	2.32664	0.724251	0.310693	1.01952	3.57263	0.260901	0.936981	0.964003	Q9NXK8	sp|Q9NXK8|FXL12_HUMAN F-box/LRR-repeat protein 12 OS=Homo sapiens GN=FBXL12 PE=1 SV=1	0.0001
KH.L152.55.v1.B.SL3-1	152	338	287	190	102	121	549	152	181	152	14.5596	33.8367	25.3499	16.8498	9.62758	11.4625	48.1716	14.9922	18.4987	13.5417	2.32402	0.749183	0.664688	0.571378	4.20252	0.311225	1.23388	0.73204	Q9ZTZ7	sp|Q9ZTZ7|KEA1_ARATH K(+) efflux antiporter 1, chloroplastic OS=Arabidopsis thaliana GN=KEA1 PE=1 SV=2	0.17
KH.C12.318.v1.A.SL1-1	45	100	157	499	547	41	161	275	389	582	0.594755	1.38131	1.91344	6.10606	7.12401	0.53592	1.94924	3.74261	5.48569	7.15442	2.32249	1.38523	3.19115	1.16671	3.63718	1.92004	1.46574	1.3042	Q3URY6	sp|Q3URY6|ARMC2_MOUSE Armadillo repeat-containing protein 2 OS=Mus musculus GN=Armc2 PE=2 SV=3	1e-11
KH.C8.301.v2.A.SL1-1	54	120	89	87	77	43	173	88	74	77	3.82279	8.87838	5.80985	5.70218	5.37142	3.01055	11.2188	6.41484	5.58952	5.06994	2.32249	0.654382	0.981467	0.941994	3.72649	0.571795	0.871342	0.907045	P62257	sp|P62257|UBE2H_MOUSE Ubiquitin-conjugating enzyme E2 H OS=Mus musculus GN=Ube2h PE=2 SV=1	6e-11
KH.S1247.1.v2.A.ND1-1	81	180	166	87	72	52	256	98	102	76	5.31096	12.3347	10.0366	5.28132	4.65192	3.37196	15.3759	6.61654	7.13583	4.63477	2.32249	0.813689	0.526208	0.880826	4.55994	0.430318	1.07848	0.649506	Q9P000	sp|Q9P000|COMD9_HUMAN COMM domain-containing protein 9 OS=Homo sapiens GN=COMMD9 PE=1 SV=2	5e-05
KH.C11.128.v1.A.nonSL3-1	298	661	692	398	214	178	707	347	281	259	9.54846	22.1353	20.4462	11.8069	6.75682	5.64063	20.7515	11.4489	9.60682	7.71867	2.3182	0.923692	0.577462	0.572279	3.67894	0.551714	0.839105	0.803458	Q3B8G4	sp|Q3B8G4|YIPF3_XENLA Protein YIPF3 OS=Xenopus laevis GN=yipf3 PE=2 SV=1	1e-43
KH.S790.4.v1.A.SL1-1	207	459	566	548	407	119	454	309	435	460	6.00037	13.9055	15.1291	14.707	11.6256	3.41149	12.0553	9.22322	13.454	12.402	2.31744	1.08799	0.972099	0.79048	3.53372	0.765079	1.45871	0.921803	Q3ZBE6	sp|Q3ZBE6|TM135_BOVIN Transmembrane protein 135 OS=Bos taurus GN=TMEM135 PE=2 SV=1	1e-27
KH.C5.428.v2.A.SL2-1	215	476	406	366	427	235	604	269	260	482	6.41279	14.8382	11.1667	10.1071	12.5501	6.93213	16.5028	8.26186	8.27443	13.3715	2.31385	0.752561	0.90511	1.24172	2.38063	0.500632	1.00152	1.61601	Q6DFJ9	sp|Q6DFJ9|CCNJ_XENLA Cyclin-J OS=Xenopus laevis GN=ccnj PE=2 SV=1	3e-23
KH.C11.378.v1.A.SL1-1	733	1622	1679	1496	1022	514	1755	877	745	937	20.0544	46.3792	42.359	37.8942	27.553	13.9078	43.9842	24.7071	21.748	23.8436	2.31267	0.913319	0.894597	0.727103	3.16255	0.561728	0.88023	1.09636	P56745	sp|P56745|CLD1_RAT Claudin-1 OS=Rattus norvegicus GN=Cldn1 PE=2 SV=2	0.0001
KH.C4.746.v1.A.SL3-1	58	128	114	91	45	41	185	79	115	76	2.84395	6.5595	5.15452	4.13115	2.1743	1.98824	8.30958	3.98876	6.01656	3.46604	2.30647	0.78581	0.801462	0.526318	4.17937	0.48002	1.50838	0.576083	Q08623	sp|Q08623|HDHD1_HUMAN Pseudouridine-5'-monophosphatase OS=Homo sapiens GN=HDHD1 PE=1 SV=3	2e-34
KH.L9.35.v1.A.ND1-1	107	236	294	380	305	96	258	208	205	325	2.30302	5.30875	5.83513	7.57239	6.46883	2.04351	5.08683	4.60993	4.70787	6.50614	2.30512	1.09915	1.29772	0.854266	2.48927	0.906248	1.02125	1.38197	Q6DFR1	sp|Q6DFR1|S22AF_XENTR Solute carrier family 22 member 15 OS=Xenopus tropicalis GN=slc22a15 PE=2 SV=2	2e-13
KH.C6.17.v1.A.ND1-1	54	119	157	217	230	57	149	119	159	238	0.998606	2.29992	2.67725	3.71531	4.19122	1.04247	2.52406	2.26602	3.13728	4.09358	2.30313	1.16406	1.38773	1.12809	2.42122	0.897768	1.38449	1.30482	P27674	sp|P27674|GTR1_BOVIN Solute carrier family 2, facilitated glucose transporter member 1 OS=Bos taurus GN=SLC2A1 PE=2 SV=1	0.001
KH.C8.170.v1.A.SL2-1	64	141	126	211	101	42	241	114	263	156	2.87095	6.61044	5.212	8.7632	4.46456	1.86331	9.90319	5.26583	12.588	6.50872	2.30253	0.78845	1.68135	0.509467	5.31484	0.53173	2.39051	0.517057	P59999	sp|P59999|ARPC4_MOUSE Actin-related protein 2/3 complex subunit 4 OS=Mus musculus GN=Arpc4 PE=1 SV=3	1e-64
KH.L172.27.v1.A.nonSL2-1	94	207	274	185	98	106	249	132	101	107	2.98031	6.85915	8.01075	5.43051	3.06177	3.32377	7.2318	4.30948	3.41674	3.15532	2.30149	1.16789	0.677903	0.563808	2.17579	0.595907	0.792843	0.92349	Q96G27	sp|Q96G27|WBP1_HUMAN WW domain-binding protein 1 OS=Homo sapiens GN=WBP1 PE=1 SV=1	2e-08
KH.S762.2.v1.A.SL1-1	50	110	172	223	163	43	238	143	270	221	2.9382	6.75571	9.32028	12.1325	9.43868	2.49903	12.8116	8.65296	16.929	12.079	2.29926	1.37962	1.30174	0.777964	5.12662	0.675403	1.95644	0.713507	O43805	sp|O43805|SSNA1_HUMAN Sjoegren syndrome nuclear autoantigen 1 OS=Homo sapiens GN=SSNA1 PE=1 SV=2	1e-28
KH.C10.177.v2.A.ND1-2	47	103	127	334	504	43	179	199	298	566	1.60955	3.68646	4.0105	10.5898	17.0078	1.45635	5.6153	7.0174	10.8888	18.0281	2.29037	1.0879	2.64052	1.60606	3.85574	1.24969	1.55168	1.65565	Q5ZL16	sp|Q5ZL16|WIPI3_CHICK WD repeat domain phosphoinositide-interacting protein 3 OS=Gallus gallus GN=WDR45B PE=2 SV=1	5e-89
KH.C3.207.v1.A.ND2-1	68	149	84	66	126	93	290	72	36	112	2.24064	5.13117	2.5523	2.01346	4.09116	3.03066	8.75336	2.44294	1.26568	3.43248	2.29004	0.497411	0.78888	2.0319	2.88827	0.279086	0.518095	2.71197	Q6NWZ9	sp|Q6NWZ9|CDO1_DANRE Cysteine dioxygenase type 1 OS=Danio rerio GN=cdo1 PE=2 SV=1	5e-40
KH.C5.78.v2.A.SL1-1	282	617	555	256	163	162	821	244	211	211	14.2915	32.6799	25.9365	12.0117	8.14007	8.11959	38.1141	12.7331	11.4095	9.94574	2.28666	0.793653	0.46312	0.67768	4.69408	0.33408	0.89605	0.871705	Q91W45	sp|Q91W45|PAI2B_MOUSE Polyadenylate-binding protein-interacting protein 2B OS=Mus musculus GN=Paip2b PE=2 SV=2	0.1
KH.C1.153.v1.A.ND1-1	150	328	325	179	168	153	397	133	84	186	4.26621	9.74968	8.52359	4.71345	4.70838	4.30361	10.3432	3.8951	2.5491	4.92028	2.28533	0.874243	0.552988	0.998925	2.40338	0.376587	0.654436	1.9302	Q9PU85	sp|Q9PU85|PIM3_COTJA Serine/threonine-protein kinase pim-3 OS=Coturnix coturnix japonica GN=PIM3 PE=2 SV=1	5e-24
KH.C7.329.v1.A.SL1-1	206	449	462	347	268	140	623	232	348	351	9.02637	20.5617	18.6671	14.077	11.5716	6.06686	25.0062	10.4677	16.2698	14.3047	2.27796	0.907859	0.754109	0.822019	4.12176	0.418604	1.55429	0.87922	Q9D7P6	sp|Q9D7P6|ISCU_MOUSE Iron-sulfur cluster assembly enzyme ISCU, mitochondrial OS=Mus musculus GN=Iscu PE=1 SV=1	8e-44
KH.C14.432.v1.B.ND1-1	78	170	464	1068	1216	66	232	768	777	1138	0.323919	0.737831	1.77684	4.10627	4.97608	0.271067	0.882557	3.28412	3.44286	4.39551	2.27783	2.4082	2.311	1.21182	3.25587	3.72115	1.04833	1.27671	Q27802	sp|Q27802|DYHC2_TRIGR Cytoplasmic dynein 2 heavy chain 1 OS=Tripneustes gratilla GN=DYH1B PE=2 SV=2	0
KH.C12.253.v1.A.SL1-1	113	246	245	96	45	55	307	104	92	38	8.17844	18.6077	16.3511	6.43278	3.20935	3.93682	20.3537	7.75072	7.10454	2.55801	2.27522	0.878726	0.393416	0.498905	5.17009	0.380801	0.91663	0.360052	Q8WWB3	sp|Q8WWB3|DYDC1_HUMAN DPY30 domain-containing protein 1 OS=Homo sapiens GN=DYDC1 PE=1 SV=1	9e-09
KH.C5.407.v1.A.nonSL11-1	323	703	526	198	206	210	733	210	157	207	13.6006	30.9368	20.4234	7.71888	8.54738	8.74508	28.273	9.10521	7.05359	8.10682	2.27467	0.660166	0.377943	1.10733	3.23301	0.322047	0.774676	1.14932	Q32PG9	sp|Q32PG9|FXL12_BOVIN F-box/LRR-repeat protein 12 OS=Bos taurus GN=FBXL12 PE=2 SV=1	0.0002
KH.C4.488.v1.A.SL1-1	64	139	258	715	801	54	167	515	581	842	1.79545	4.07544	6.67425	18.571	22.1431	1.49823	4.29164	14.8771	17.3911	21.9701	2.26987	1.63767	2.78248	1.19235	2.86448	3.46653	1.16898	1.2633	P34885	sp|P34885|KPC1B_CAEEL Protein kinase C-like 1B OS=Caenorhabditis elegans GN=pkc-1 PE=2 SV=2	1e-13
KH.C3.104.v2.C.SL3-1	246	534	411	205	131	171	815	174	212	159	10.4164	23.6314	16.0477	8.03659	5.46595	7.16092	31.6121	7.58663	9.578	6.26189	2.26868	0.679083	0.500793	0.680134	4.41453	0.239991	1.26248	0.653779	P28075	sp|P28075|PSB5_RAT Proteasome subunit beta type-5 OS=Rattus norvegicus GN=Psmb5 PE=1 SV=3	5e-71
KH.L170.8.v2.A.ND1-1	47	102	125	212	153	47	201	128	268	185	0.825682	1.87276	2.02495	3.44815	2.64861	0.816589	3.23463	2.31548	5.0235	3.02282	2.26813	1.08127	1.70283	0.768126	3.96115	0.715843	2.16952	0.601737	Q9JLV6	sp|Q9JLV6|PNKP_MOUSE Bifunctional polynucleotide phosphatase/kinase OS=Mus musculus GN=Pnkp PE=1 SV=2	2e-53
KH.C1.170.v1.A.SL2-1	47	102	93	274	355	29	138	179	173	315	1.26903	2.87833	2.31551	6.84952	9.44528	0.774395	3.41324	4.97673	4.98399	7.91063	2.26813	0.804462	2.95811	1.37897	4.40762	1.45807	1.00146	1.58721	Q59I64	sp|Q59I64|YLAT2_DANRE Y+L amino acid transporter 2 OS=Danio rerio GN=slc7a6 PE=2 SV=1	7e-102
KH.C11.234.v1.A.SL2-1	1564	3394	2810	979	520	804	3631	980	959	559	86.5205	196.228	143.343	50.1418	28.3464	43.9875	184.002	55.8246	56.6053	28.7621	2.26799	0.730495	0.349802	0.565324	4.18305	0.303392	1.01399	0.508116	Q8K3J1	sp|Q8K3J1|NDUS8_MOUSE NADH dehydrogenase [ubiquinone] iron-sulfur protein 8, mitochondrial OS=Mus musculus GN=Ndufs8 PE=1 SV=1	4e-68
KH.C3.258.v6.A.nonSL8-1	118	256	184	95	83	83	312	77	90	93	5.35695	12.1462	7.70269	3.99296	3.71301	3.72653	12.9749	3.59951	4.35948	3.92685	2.26738	0.634162	0.518385	0.929889	3.48176	0.277421	1.21113	0.900762	Q9S9Z8	sp|Q9S9Z8|14311_ARATH 14-3-3-like protein GF14 omicron OS=Arabidopsis thaliana GN=GRF11 PE=2 SV=2	6e-49
KH.C6.101.v2.A.SL4-1	48	104	236	633	841	74	163	253	335	803	0.352871	0.799049	1.59983	4.30837	6.09231	0.538017	1.09768	1.91519	2.6277	5.49055	2.26443	2.00217	2.69301	1.41406	2.04023	1.74476	1.37203	2.08949	F1MSG6	sp|F1MSG6|RPGF2_BOVIN Rap guanine nucleotide exchange factor 2 OS=Bos taurus GN=RAPGEF2 PE=1 SV=2	1e-95
KH.C14.327.v1.A.SL4-1	74	160	159	183	147	66	236	158	153	133	1.71671	3.87927	3.40134	3.93052	3.36042	1.51425	5.01521	3.77431	3.78714	2.86973	2.25972	0.876798	1.15558	0.854955	3.312	0.752573	1.0034	0.757757	Q6IR55	sp|Q6IR55|TM129_XENLA Transmembrane protein 129 OS=Xenopus laevis GN=tmem129 PE=2 SV=1	5e-47
KH.C14.315.v1.A.ND1-1	51	110	133	240	229	30	323	169	252	291	1.72438	3.88705	4.14669	7.51291	7.62973	1.00317	10.0041	5.8839	9.09114	9.15125	2.25418	1.0668	1.81178	1.01555	9.9725	0.58815	1.54509	1.00661	Q4N4N8	sp|Q4N4N8|TXND_THEPA Thioredoxin domain-containing protein OS=Theileria parva GN=TP02_0602 PE=1 SV=1	0.093
KH.C8.317.v1.A.nonSL10-1	181	390	351	193	34	112	440	181	134	49	9.64775	21.7259	17.2522	9.52445	1.78582	5.90413	21.4839	9.93443	7.62094	2.42923	2.25192	0.794082	0.552073	0.187499	3.63879	0.462412	0.767124	0.318758	Q9CQJ8	sp|Q9CQJ8|NDUB9_MOUSE NADH dehydrogenase [ubiquinone] 1 beta subcomplex subunit 9 OS=Mus musculus GN=Ndufb9 PE=1 SV=3	3e-26
KH.C5.407.v2.A.nonSL11-2	170	365	270	103	101	99	428	99	89	117	9.43898	21.1805	13.8238	5.29479	5.52598	5.43628	21.7687	5.66015	5.27257	6.0421	2.24393	0.65267	0.383019	1.04366	4.00434	0.260013	0.931525	1.14595	Q32PG9	sp|Q32PG9|FXL12_BOVIN F-box/LRR-repeat protein 12 OS=Bos taurus GN=FBXL12 PE=2 SV=1	0.0002
KH.C1.948.v1.A.SL1-1	353	756	664	465	456	212	890	322	457	576	10.345	23.155	17.9438	12.6167	13.1684	6.14445	23.8924	9.71694	14.2899	15.7002	2.23827	0.774941	0.703123	1.04373	3.88845	0.406696	1.47062	1.09869	Q6Y1H2	sp|Q6Y1H2|HACD2_HUMAN Very-long-chain (3R)-3-hydroxyacyl-[acyl-carrier protein] dehydratase 2 OS=Homo sapiens GN=PTPLB PE=1 SV=1	3e-32
KH.C5.508.v1.A.SL1-2	73	156	209	175	22	65	324	181	106	23	4.11883	9.19902	10.8739	9.14164	1.22317	3.62706	16.7459	10.5159	6.38136	1.20699	2.23341	1.18207	0.840694	0.133802	4.61694	0.627968	0.60683	0.189144	Q99P74	sp|Q99P74|RB27B_RAT Ras-related protein Rab-27B OS=Rattus norvegicus GN=Rab27b PE=2 SV=3	2e-34
KH.L39.8.v1.A.nonSL46-1	293	626	492	82	27	251	673	158	83	31	27.4844	61.3705	42.5572	7.12145	2.49571	23.2854	57.8292	15.2614	8.30718	2.70462	2.23292	0.693447	0.167338	0.35045	2.4835	0.263904	0.544328	0.325577	Q9CR57	sp|Q9CR57|RL14_MOUSE 60S ribosomal protein L14 OS=Mus musculus GN=Rpl14 PE=2 SV=3	4e-19
KH.C1.902.v1.A.SL1-1	345	737	733	669	406	249	1358	542	768	460	17.7021	39.522	34.6815	31.781	20.5279	12.6356	63.8291	28.6366	42.0459	21.9528	2.23262	0.877524	0.916365	0.645917	5.05153	0.448645	1.46825	0.522115	P21266	sp|P21266|GSTM3_HUMAN Glutathione S-transferase Mu 3 OS=Homo sapiens GN=GSTM3 PE=1 SV=3	1e-29
KH.C8.139.v1.A.SL1-1	74	158	149	119	111	52	252	88	123	128	3.05906	6.8262	5.67977	4.55447	4.52158	2.12593	9.54266	3.74589	5.42522	4.92143	2.23147	0.832055	0.801876	0.992779	4.48869	0.392542	1.44831	0.90714	Q9D0W5	sp|Q9D0W5|PPIL1_MOUSE Peptidyl-prolyl cis-trans isomerase-like 1 OS=Mus musculus GN=Ppil1 PE=2 SV=1	6e-50
KH.C4.43.v1.A.SL2-1	1574	3350	2288	794	503	836	4803	897	935	550	52.206	116.125	69.9778	24.3821	16.4398	27.4228	145.929	30.6355	33.089	16.967	2.22437	0.602607	0.348426	0.674255	5.32144	0.209934	1.08009	0.512768	P34942	sp|P34942|NDUAA_BOVIN NADH dehydrogenase [ubiquinone] 1 alpha subcomplex subunit 10, mitochondrial OS=Bos taurus GN=NDUFA10 PE=1 SV=1	0.042
KH.C12.470.v1.A.SL3-1	484	1030	1049	730	71	352	979	670	385	101	28.405	63.176	56.7693	39.665	4.106	20.4306	52.6314	40.4893	24.1083	5.51311	2.22412	0.898589	0.698705	0.103517	2.5761	0.7693	0.595423	0.228681	Q9CZB0	sp|Q9CZB0|C560_MOUSE Succinate dehydrogenase cytochrome b560 subunit, mitochondrial OS=Mus musculus GN=Sdhc PE=2 SV=1	4e-10
KH.C8.540.v2.A.nonSL4-1	209	444	350	199	109	146	651	173	161	116	7.55721	16.7789	11.67	6.66198	3.88377	5.22106	21.563	6.44137	6.21151	3.90121	2.22025	0.695517	0.570862	0.582975	4.13001	0.298723	0.964316	0.628061	P55859	sp|P55859|PNPH_BOVIN Purine nucleoside phosphorylase OS=Bos taurus GN=PNP PE=1 SV=3	7e-40
KH.C12.88.v1.A.SL1-2	81	172	216	264	238	44	202	148	280	260	3.75243	8.32764	9.2272	11.3231	10.8647	2.01591	8.57219	7.06002	13.8402	11.2028	2.21927	1.10802	1.22715	0.959511	4.25228	0.823596	1.96036	0.80944	Q6P3W2	sp|Q6P3W2|DJC24_HUMAN DnaJ homolog subfamily C member 24 OS=Homo sapiens GN=DNAJC24 PE=1 SV=1	3e-05
KH.C12.443.v1.A.SL2-1	418	886	832	521	292	241	1162	365	418	365	20.5628	45.5519	37.7415	23.729	14.1547	11.725	52.3632	18.4891	21.9401	16.7003	2.21525	0.828538	0.628725	0.596516	4.46593	0.353094	1.18665	0.761178	P53358	sp|P53358|PCNA_STYCL Proliferating cell nuclear antigen OS=Styela clava GN=PCNA PE=2 SV=1	1e-76
KH.C11.402.v1.A.ND1-1	76	161	196	515	586	75	198	264	383	712	1.9024	4.21192	4.5241	11.9352	14.4543	1.85669	4.54011	6.80469	10.2292	16.5765	2.214	1.07412	2.63814	1.21106	2.44527	1.4988	1.50326	1.62051	Q9V3X4	sp|Q9V3X4|BSCL2_DROME Seipin OS=Drosophila melanogaster GN=Seipin PE=2 SV=1	0.29
KH.C8.34.v1.A.SL1-1	494	1044	937	659	531	355	1362	464	645	642	16.6283	36.7272	29.0837	20.5372	17.6128	11.8179	41.9964	16.0826	23.1653	20.0994	2.20872	0.791884	0.706142	0.857602	3.55362	0.382952	1.44039	0.867651	Q5ZHM5	sp|Q5ZHM5|RER1_CHICK Protein RER1 OS=Gallus gallus GN=RER1 PE=2 SV=1	2e-55
KH.C2.4.v2.A.SL5-1	296	625	656	336	140	219	658	285	232	151	11.682	25.7793	23.8736	12.2772	5.44458	8.54789	23.7883	11.5821	9.76942	5.54278	2.20676	0.926076	0.514259	0.443471	2.78294	0.486881	0.843495	0.56736	C1AW00	sp|C1AW00|ATPG_RHOOB ATP synthase gamma chain OS=Rhodococcus opacus (strain B4) GN=atpG PE=3 SV=1	4.4
KH.L108.59.v1.A.SL1-1	72	152	211	245	168	72	217	197	191	195	1.93712	4.27399	5.23474	6.10275	4.45395	1.91579	5.34807	5.45767	5.48295	4.87961	2.20636	1.22479	1.16582	0.729827	2.79158	1.02049	1.00463	0.889961	Q28P47	sp|Q28P47|RHAM_JANSC L-rhamnose mutarotase OS=Jannaschia sp. (strain CCS1) GN=rhaM PE=3 SV=1	0.094
KH.S653.2.v2.A.SL2-1	64	135	148	255	139	54	253	203	227	189	2.04778	4.51443	4.3667	7.55403	4.38258	1.70878	7.41544	6.6883	7.74971	5.62459	2.20455	0.967276	1.72992	0.580165	4.3396	0.901943	1.1587	0.725781	P0CO10	sp|P0CO10|CLF1_CRYNJ Pre-mRNA-splicing factor CLF1 OS=Cryptococcus neoformans var. neoformans serotype D (strain JEC21 / ATCC MYA-565) GN=CLF1 PE=3 SV=1	6
KH.C4.516.v2.A.nonSL8-1	101	213	106	76	22	113	435	102	57	37	2.04835	4.5147	1.98234	1.42703	0.439661	2.26648	8.08138	2.1301	1.23343	0.697928	2.20406	0.439085	0.71987	0.308096	3.56561	0.263581	0.579047	0.565844	Q3SZZ2	sp|Q3SZZ2|XBP1_BOVIN X-box-binding protein 1 OS=Bos taurus GN=XBP1 PE=2 SV=1	7e-11
KH.C1.705.v1.A.SL1-1	169	356	377	317	195	129	384	238	266	250	5.62594	12.3858	11.5728	9.77018	6.39668	4.24706	11.7099	8.15834	9.44814	7.74059	2.20155	0.934359	0.844237	0.654715	2.75717	0.696706	1.15809	0.819272	Q9Z2F7	sp|Q9Z2F7|BNI3L_MOUSE BCL2/adenovirus E1B 19 kDa protein-interacting protein 3-like OS=Mus musculus GN=Bnip3l PE=1 SV=1	6e-14
KH.C2.608.v1.A.ND2-1	124	261	214	143	138	80	324	97	136	193	7.23048	15.9057	11.5066	7.71999	7.92933	4.61345	17.3063	5.82417	8.46137	10.4672	2.19981	0.723429	0.670917	1.02712	3.75127	0.336535	1.4528	1.23705	Q08CN0	sp|Q08CN0|TPPC2_DANRE Trafficking protein particle complex subunit 2 OS=Danio rerio GN=trappc2 PE=2 SV=1	6e-37
KH.C8.845.v1.A.ND1-1	48	101	135	176	149	28	170	117	168	156	1.64255	3.61215	4.25991	5.57604	5.02431	0.947604	5.32894	4.12269	6.134	4.96511	2.19911	1.17933	1.30896	0.901053	5.62359	0.773643	1.48786	0.80944	Q6DHN0	sp|Q6DHN0|TMM53_DANRE Transmembrane protein 53 OS=Danio rerio GN=tmem53 PE=2 SV=1	1e-20
KH.C4.420.v1.A.nonSL1-1	68	143	121	80	27	42	156	69	65	25	4.59833	10.1063	7.54511	5.0086	1.79915	2.80887	9.66339	4.8046	4.68987	1.57238	2.19783	0.746572	0.663821	0.359212	3.44031	0.497197	0.976121	0.335271	Q9N4G9	sp|Q9N4G9|RUXG_CAEEL Probable small nuclear ribonucleoprotein G OS=Caenorhabditis elegans GN=snr-7 PE=3 SV=1	1e-16
KH.C14.191.v3.A.nonSL11-1	128	269	252	111	49	59	294	95	93	61	4.88157	10.7218	8.86215	3.9193	1.84144	2.22532	10.2709	3.7307	3.78433	2.16374	2.19638	0.826553	0.442251	0.46984	4.61549	0.363229	1.01438	0.571764	Q28F55	sp|Q28F55|KAD2_XENTR Adenylate kinase 2, mitochondrial OS=Xenopus tropicalis GN=ak2 PE=2 SV=1	1e-58
KH.L39.8.v1.A.nonSL9-1	314	659	479	87	19	212	716	158	84	38	29.8875	65.5558	42.042	7.66679	1.78207	19.9566	62.4289	15.4858	8.5309	3.3641	2.19342	0.641317	0.18236	0.23244	3.12824	0.248055	0.550886	0.394343	Q63507	sp|Q63507|RL14_RAT 60S ribosomal protein L14 OS=Rattus norvegicus GN=Rpl14 PE=1 SV=3	4e-21
KH.C1.182.v1.A.nonSL11-1	174	365	300	203	59	127	374	146	164	98	22.9838	50.3885	36.5412	24.8258	7.67956	16.5908	45.254	19.8583	23.1139	12.0399	2.19235	0.725189	0.679393	0.309338	2.72766	0.438818	1.16394	0.520897	B0BLS0	sp|B0BLS0|OST4_RAT Dolichyl-diphosphooligosaccharide--protein glycosyltransferase subunit 4 OS=Rattus norvegicus GN=Ost4 PE=3 SV=1	2e-08
KH.C11.105.v2.B.SL1-1	106	222	207	172	273	83	254	156	132	206	2.46411	5.39354	4.43725	3.70184	6.25359	1.9082	5.40881	3.73419	3.27405	4.45397	2.18884	0.822697	0.834266	1.68932	2.83451	0.69039	0.876776	1.36039	Q4UMH6	sp|Q4UMH6|Y381_RICFE Putative ankyrin repeat protein RF_0381 OS=Rickettsia felis (strain ATCC VR-1525 / URRWXCal2) GN=RF_0381 PE=4 SV=1	4e-22
KH.C5.329.v1.A.nonSL3-1	219	458	378	209	99	152	650	204	220	134	16.9033	36.9454	26.9035	14.9352	7.52966	11.6028	45.9573	16.2134	18.1179	9.61964	2.18568	0.728197	0.555138	0.504157	3.96089	0.352793	1.11746	0.530948	Q9CQN7	sp|Q9CQN7|RM41_MOUSE 39S ribosomal protein L41, mitochondrial OS=Mus musculus GN=Mrpl41 PE=2 SV=1	0.21
KH.C2.1075.v1.A.nonSL5-1	110	230	201	113	110	68	265	91	111	99	3.16029	6.90603	5.325	3.00572	3.11415	1.93212	6.97419	2.69211	3.40262	2.64543	2.18525	0.771065	0.564454	1.03607	3.60961	0.386011	1.26392	0.777467	Q969R8	sp|Q969R8|ITFG2_HUMAN Integrin-alpha FG-GAP repeat-containing protein 2 OS=Homo sapiens GN=ITFG2 PE=1 SV=1	9e-43
KH.C3.728.v1.A.ND2-1	143	299	199	126	60	86	400	120	149	94	4.86771	10.6372	6.2464	3.97095	2.01257	2.89519	12.4727	4.20617	5.41166	2.97606	2.18525	0.587225	0.635717	0.506824	4.30809	0.337229	1.2866	0.549935	Q5RDJ5	sp|Q5RDJ5|CYB5B_PONAB Cytochrome b5 type B OS=Pongo abelii GN=CYB5B PE=2 SV=2	3e-09
KH.S404.1.v3.A.nonSL28-2	307	641	340	119	56	201	892	169	111	52	6.95464	15.1761	7.10238	2.49585	1.25008	4.50322	18.5103	3.94221	2.68297	1.09563	2.18216	0.467997	0.35141	0.500862	4.11047	0.212973	0.680575	0.408366	Q17770	sp|Q17770|PDI2_CAEEL Protein disulfide-isomerase 2 OS=Caenorhabditis elegans GN=pdi-2 PE=1 SV=1	5e-77
KH.C1.411.v1.A.nonSL6-1	462	964	797	315	80	225	1031	257	233	97	27.0438	58.9751	43.0202	17.0715	4.61453	13.0256	55.2837	15.4909	14.5525	5.28108	2.18073	0.729464	0.396825	0.270306	4.24423	0.280206	0.939425	0.362899	Q9DCS9	sp|Q9DCS9|NDUBA_MOUSE NADH dehydrogenase [ubiquinone] 1 beta subcomplex subunit 10 OS=Mus musculus GN=Ndufb10 PE=1 SV=3	2e-09
KH.L46.15.v1.B.SL1-1	134	279	240	336	294	104	377	255	297	389	3.074	6.68913	5.07691	7.13631	6.64597	2.35952	7.92235	6.0236	7.26962	8.29994	2.17603	0.758979	1.40564	0.93129	3.35761	0.760331	1.20686	1.14173	D3Z5L6	sp|D3Z5L6|S18B1_MOUSE MFS-type transporter SLC18B1 OS=Mus musculus GN=Slc18b1 PE=2 SV=2	0.0002
KH.C10.208.v1.A.nonSL6-1	283	589	444	156	40	154	535	180	122	61	9.33181	20.2984	13.5005	4.76255	1.29973	5.02216	16.1602	6.1118	4.29236	1.87083	2.17518	0.665105	0.352767	0.272905	3.21778	0.378201	0.702307	0.435853	Q8HXY2	sp|Q8HXY2|MCAT_MACFA Mitochondrial carnitine/acylcarnitine carrier protein OS=Macaca fascicularis GN=SLC25A20 PE=2 SV=1	1e-65
KH.C8.244.v1.A.ND1-1	1032	2146	2062	1574	921	717	2640	1083	1397	1185	60.0217	130.444	110.588	84.7557	52.7838	41.2419	140.652	64.8596	86.6925	64.1022	2.17328	0.847777	0.766412	0.622776	3.41042	0.461135	1.33662	0.739421	P50151	sp|P50151|GBG10_HUMAN Guanine nucleotide-binding protein G(I)/G(S)/G(O) subunit gamma-10 OS=Homo sapiens GN=GNG10 PE=1 SV=1	0.008
KH.C10.334.v1.A.SL2-1	63	131	204	463	696	60	200	214	375	815	2.15911	4.69215	6.44694	14.691	23.5048	2.03365	6.27882	7.55206	13.7127	25.9788	2.17319	1.37398	2.27875	1.59994	3.08746	1.20278	1.81575	1.89451	Q5EAL3	sp|Q5EAL3|SWET1_XENTR Sugar transporter SWEET1 OS=Xenopus tropicalis GN=slc50a1 PE=2 SV=1	2e-13
KH.C10.447.v1.A.SL2-1	76	158	108	96	95	61	190	92	108	101	1.97213	4.28495	2.58425	2.30637	2.42917	1.56546	4.51636	2.45825	2.99021	2.43764	2.17275	0.6031	0.89247	1.05324	2.885	0.544299	1.2164	0.815206	Q7M456	sp|Q7M456|RNOY_CRAGI Ribonuclease Oy OS=Crassostrea gigas PE=1 SV=1	2e-17
KH.C10.208.v1.A.nonSL26-1	293	609	493	162	61	169	562	201	130	59	9.35517	20.322	14.5151	4.78888	1.91922	5.33656	16.4374	6.60841	4.42877	1.75211	2.17228	0.714253	0.329924	0.400767	3.08015	0.402035	0.670173	0.39562	O43772	sp|O43772|MCAT_HUMAN Mitochondrial carnitine/acylcarnitine carrier protein OS=Homo sapiens GN=SLC25A20 PE=1 SV=1	2e-65
KH.S831.4.v1.A.SL1-1	65	135	167	247	173	64	249	208	216	225	1.94003	4.21109	4.59621	6.82538	5.08806	1.88914	6.8078	6.39256	6.87867	6.24601	2.17063	1.09145	1.485	0.745463	3.60365	0.939004	1.07604	0.908026	Q5T1Q4	sp|Q5T1Q4|S35F1_HUMAN Solute carrier family 35 member F1 OS=Homo sapiens GN=SLC35F1 PE=2 SV=2	2e-39
KH.C13.19.v3.R.ND5-1	222	460	298	153	74	153	550	162	149	101	8.35397	18.0911	10.3406	5.33048	2.744	5.69406	18.959	6.27728	5.9825	3.53498	2.16556	0.571585	0.515492	0.514775	3.32961	0.331098	0.953039	0.590887	Q80Z71	sp|Q80Z71|TENN_MOUSE Tenascin-N OS=Mus musculus GN=Tnn PE=1 SV=2	3e-05
KH.C2.77.v1.A.nonSL5-1	1823	3776	2347	642	199	1016	5096	950	630	246	107.127	231.905	127.179	34.9287	11.5233	59.0468	274.318	57.4847	39.5011	13.4454	2.16477	0.548408	0.274643	0.329909	4.64578	0.209555	0.687158	0.34038	Q58DT1	sp|Q58DT1|RL7_BOVIN 60S ribosomal protein L7 OS=Bos taurus GN=RPL7 PE=2 SV=1	1e-56
KH.C2.387.v1.A.SL5-1	59	122	149	148	106	54	158	110	106	121	0.705867	1.52545	1.64379	1.63934	1.24965	0.638933	1.73157	1.35513	1.35311	1.34643	2.1611	1.07758	0.997291	0.762291	2.7101	0.782599	0.998511	0.99506	Q8N264	sp|Q8N264|RHG24_HUMAN Rho GTPase-activating protein 24 OS=Homo sapiens GN=ARHGAP24 PE=1 SV=2	1e-51
KH.C10.46.v2.A.SL4-1	167	345	228	100	35	107	369	94	82	44	7.46182	16.1107	9.39403	4.13679	1.54102	4.72827	15.1032	4.32487	3.9093	1.82855	2.15908	0.583094	0.440364	0.372516	3.19422	0.286355	0.903911	0.467744	A7MC64	sp|A7MC64|RTN1_XENTR Reticulon-1 OS=Xenopus tropicalis GN=rtn1 PE=2 SV=2	2e-18
KH.C8.338.v6.A.SL1-1	62	128	93	118	110	45	168	72	119	112	1.89416	4.08697	2.61997	3.33766	3.31154	1.35965	4.70162	2.26503	3.87908	3.18251	2.15767	0.641055	1.27393	0.992173	3.45796	0.481756	1.71259	0.820428	Q6DII2	sp|Q6DII2|SRSF1_XENTR Serine/arginine-rich splicing factor 1 OS=Xenopus tropicalis GN=srsf1 PE=2 SV=1	3e-51
KH.C5.522.v1.A.SL1-1	65	134	201	106	7	84	263	148	71	5	0.884107	1.90486	2.52102	1.33485	0.0938213	1.12996	3.27688	2.07286	1.0304	0.0632539	2.15456	1.32347	0.529488	0.070286	2.90001	0.632571	0.497091	0.0613877	P31646	sp|P31646|S6A13_RAT Sodium- and chloride-dependent GABA transporter 2 OS=Rattus norvegicus GN=Slc6a13 PE=1 SV=1	6e-92
KH.L57.12.v1.A.SL1-1	52	107	176	148	218	38	122	95	112	197	2.34892	5.05144	7.33106	6.1896	9.70362	1.69762	5.04822	4.41882	5.39809	8.27671	2.15054	1.45128	0.844297	1.56773	2.97371	0.875321	1.22161	1.53327	Q5ZKX9	sp|Q5ZKX9|ERD22_CHICK ER lumen protein retaining receptor 2 OS=Gallus gallus GN=KDELR2 PE=2 SV=1	2e-28
KH.C3.785.v1.C.nonSL5-1	52	107	144	76	58	43	181	57	71	49	7.38548	15.8827	18.8594	9.99366	8.11737	6.03997	23.5487	8.33618	10.7595	6.47288	2.15054	1.18741	0.529904	0.812253	3.89882	0.353997	1.29069	0.601599	P60603	sp|P60603|ROMO1_MOUSE Reactive oxygen species modulator 1 OS=Mus musculus GN=Romo1 PE=2 SV=1	6e-05
KH.C3.266.v1.A.SL1-1	52	107	136	452	735	48	222	279	302	673	1.33938	2.88038	3.23019	10.7789	18.6552	1.22273	5.23801	7.39983	8.29973	16.1228	2.15054	1.12144	3.33692	1.73072	4.28385	1.41272	1.12161	1.94257	B2RZ55	sp|B2RZ55|SIR7_RAT NAD-dependent protein deacetylase sirtuin-7 OS=Rattus norvegicus GN=Sirt7 PE=2 SV=1	6e-53
KH.L141.52.v1.A.SL1-1	125	257	269	255	143	85	466	155	257	191	5.61287	12.0608	11.1382	10.6011	6.32737	3.77472	19.1679	7.16677	12.313	7.97691	2.14877	0.92351	0.951775	0.59686	5.07797	0.373895	1.71807	0.647843	Q7M767	sp|Q7M767|UB2V2_RAT Ubiquitin-conjugating enzyme E2 variant 2 OS=Rattus norvegicus GN=Ube2v2 PE=1 SV=3	5e-21
KH.L153.42.v2.A.SL2-2	54	111	142	131	129	43	162	79	133	174	1.89805	4.07758	4.60247	4.26304	4.46802	1.49476	5.21605	2.85928	4.98794	5.68838	2.1483	1.12872	0.926252	1.04808	3.48955	0.548171	1.74447	1.14043	Q5R4C3	sp|Q5R4C3|TM50B_PONAB Transmembrane protein 50B OS=Pongo abelii GN=TMEM50B PE=2 SV=1	1e-41
KH.C3.389.v1.A.SL2-1	79	162	196	261	161	66	293	170	275	208	2.35788	5.05331	5.39435	7.21224	4.73513	1.94818	8.01079	5.22469	8.75757	5.77409	2.14316	1.06749	1.337	0.656541	4.11194	0.652206	1.67619	0.659326	Q05975	sp|Q05975|RAB2_LYMST Ras-related protein Rab-2 OS=Lymnaea stagnalis GN=RAB2 PE=2 SV=1	6e-94
KH.C12.87.v1.C.SL1-1	455	933	1065	676	238	276	1208	591	626	326	31.2344	66.9376	67.4157	42.964	16.0995	18.7379	75.9631	41.776	45.8514	20.8145	2.14307	1.00714	0.637299	0.37472	4.05397	0.549951	1.09756	0.453955
KH.C8.317.v1.A.nonSL6-1	208	426	358	178	37	97	437	157	125	49	11.0739	23.7035	17.5755	8.77388	1.94111	5.10739	21.3124	8.60703	7.10073	2.42638	2.14049	0.741474	0.49921	0.221237	4.17285	0.403852	0.824992	0.341708	Q9CQJ8	sp|Q9CQJ8|NDUB9_MOUSE NADH dehydrogenase [ubiquinone] 1 beta subcomplex subunit 9 OS=Mus musculus GN=Ndufb9 PE=1 SV=3	1e-24
KH.C3.249.v1.A.nonSL3-1	504	1032	986	406	159	315	1083	390	292	168	16.9775	36.332	30.6274	12.6621	5.2778	10.4941	33.4184	13.5277	10.495	5.26356	2.14001	0.842985	0.413424	0.416819	3.1845	0.404799	0.775814	0.501529	Q8TAC1	sp|Q8TAC1|RFESD_HUMAN Rieske domain-containing protein OS=Homo sapiens GN=RFESD PE=1 SV=1	3e-05
KH.S1083.1.v1.A.ND1-1	88	180	156	67	9	45	149	53	42	17	3.05519	6.53122	4.99424	2.1536	0.3079	1.54511	4.73866	1.89474	1.55583	0.548947	2.13775	0.764671	0.431218	0.14297	3.06688	0.399846	0.821132	0.352833	Q5HRE0	sp|Q5HRE0|Y253_STAEQ UPF0272 protein SERP0253 OS=Staphylococcus epidermidis (strain ATCC 35984 / RP62A) GN=SERP0253 PE=3 SV=1	0.26
KH.C9.138.v1.A.SL3-1	336	687	579	337	266	197	867	413	321	266	14.457	30.8931	22.9723	13.4247	11.278	8.38291	34.172	18.2981	14.7367	10.645	2.1369	0.743609	0.584383	0.840095	4.07639	0.535469	0.805368	0.722348	Q6P819	sp|Q6P819|RCD1_XENTR Cell differentiation protein RCD1 homolog OS=Xenopus tropicalis GN=rqcd1 PE=2 SV=1	1e-121
KH.C2.495.v1.A.SL1-1	68	139	130	129	81	52	305	141	185	108	2.1727	4.64164	3.83021	3.81606	2.55028	1.64318	8.92695	4.63902	6.30693	3.20952	2.13635	0.825185	0.996306	0.668301	5.43274	0.519664	1.35954	0.508887	Q17QS6	sp|Q17QS6|ASB5_BOVIN Ankyrin repeat and SOCS box protein 5 OS=Bos taurus GN=ASB5 PE=2 SV=1	1e-13
KH.C1.182.v1.A.nonSL5-1	227	464	395	240	98	169	549	176	230	129	28.1773	60.1946	45.2126	27.5816	11.987	20.7468	62.4251	22.4959	30.4619	14.8932	2.13628	0.751107	0.610043	0.434602	3.0089	0.360366	1.35411	0.488913	B0BLS0	sp|B0BLS0|OST4_RAT Dolichyl-diphosphooligosaccharide--protein glycosyltransferase subunit 4 OS=Rattus norvegicus GN=Ost4 PE=3 SV=1	4e-12
KH.L124.16.v1.A.nonSL4-1	71	145	114	106	102	70	860	245	97	107	1.79409	3.82931	2.65632	2.47986	2.53979	1.74934	19.9066	6.37484	2.61526	2.51476	2.1344	0.69368	0.933571	1.02417	11.3795	0.320237	0.410247	0.961572	Q9EPK6	sp|Q9EPK6|SIL1_MOUSE Nucleotide exchange factor SIL1 OS=Mus musculus GN=Sil1 PE=1 SV=2	2e-19
KH.C4.646.v1.A.SL1-1	74	151	190	621	759	70	290	350	462	863	2.03319	4.336	4.8138	15.7969	20.5494	1.9021	7.29889	9.90217	13.5439	22.0537	2.13261	1.11019	3.28159	1.30085	3.83727	1.35667	1.36777	1.62832	Q7T2D4	sp|Q7T2D4|ERGI2_DANRE Endoplasmic reticulum-Golgi intermediate compartment protein 2 OS=Danio rerio GN=ergic2 PE=2 SV=1	9e-30
KH.C12.33.v1.A.nonSL5-1	112	228	205	100	28	51	175	78	63	30	4.56331	9.70873	7.70201	3.77222	1.12417	2.05505	6.5315	3.27245	2.73879	1.13686	2.12757	0.793308	0.48977	0.298013	3.17827	0.501026	0.836923	0.415098	Q4S2L4	sp|Q4S2L4|DNPH1_TETNG 2'-deoxynucleoside 5'-phosphate N-hydrolase 1 OS=Tetraodon nigroviridis GN=dnph1 PE=3 SV=2	2e-28
KH.C3.223.v2.A.ND4-1	85	173	190	58	23	47	145	49	49	18	9.67614	20.5824	19.9446	6.11289	2.58002	5.29141	15.1204	5.74376	5.95163	1.90582	2.12713	0.969014	0.306493	0.422062	2.85754	0.379867	1.03619	0.320218	Q25197	sp|Q25197|HTK7_HYDVU Putative insulin-like peptide receptor OS=Hydra vulgaris GN=HTK7 PE=2 SV=1	0.55
KH.S215.3.v1.A.SL1-1	170	346	431	489	520	146	374	349	372	515	2.56143	5.44848	5.98824	6.82145	7.72055	2.17559	5.162	5.41471	5.98043	7.21716	2.12713	1.09907	1.13914	1.1318	2.37269	1.04896	1.10448	1.2068	Q6GQB9	sp|Q6GQB9|EDEM3_XENLA ER degradation-enhancing alpha-mannosidase-like protein 3 OS=Xenopus laevis GN=edem3 PE=2 SV=2	2e-101
KH.C9.771.v1.A.SL1-1	147	299	464	611	857	110	310	390	446	868	3.77988	8.03522	11.0019	14.5458	21.7147	2.79733	7.30189	10.3262	12.2363	20.759	2.12579	1.36921	1.32212	1.49285	2.61031	1.41419	1.18498	1.6965	Q6IRL9	sp|Q6IRL9|HDAC3_XENLA Histone deacetylase 3 OS=Xenopus laevis GN=hdac3 PE=2 SV=2	2e-149
KH.C13.116.v1.A.nonSL6-1	64	130	193	128	49	57	138	96	100	41	0.533025	1.13156	1.48222	0.98699	0.402138	0.469497	1.05283	0.823295	0.888636	0.317598	2.1229	1.3099	0.665885	0.407439	2.24247	0.78198	1.07936	0.357399	Q60467	sp|Q60467|CO5A1_CRILO Collagen alpha-1(V) chain OS=Cricetulus longicaudatus GN=COL5A1 PE=2 SV=1	5e-26
KH.C2.565.v1.A.SL2-1	270	548	449	405	479	206	881	308	438	613	14.4256	30.5997	22.121	20.0337	25.2184	10.885	43.1181	16.9449	24.969	30.4619	2.12121	0.722917	0.905639	1.2588	3.96124	0.392987	1.47354	1.21999	Q9VCA9	sp|Q9VCA9|SPCS3_DROME Signal peptidase complex subunit 3 OS=Drosophila melanogaster GN=Spase22-23 PE=2 SV=1	2e-27
KH.C10.494.v1.A.SL1-1	85	172	163	315	280	58	357	210	299	292	2.05283	4.34138	3.63003	7.04335	6.66352	1.38533	7.89796	5.22239	7.70479	6.55907	2.11483	0.836145	1.9403	0.946072	5.70116	0.661233	1.47534	0.851297	Q5XIK2	sp|Q5XIK2|TMX2_RAT Thioredoxin-related transmembrane protein 2 OS=Rattus norvegicus GN=Tmx2 PE=2 SV=1	2e-35
KH.C3.578.v2.A.ND2-2	95	192	214	270	251	62	303	193	276	276	5.872	12.4031	12.1973	15.4512	15.2879	3.79005	17.1561	12.2839	18.2024	15.8671	2.11224	0.983411	1.26677	0.989434	4.52662	0.716009	1.48181	0.871705	Q7T2A3	sp|Q7T2A3|DDA1_DANRE DET1- and DDB1-associated protein 1 OS=Danio rerio GN=dda1 PE=3 SV=1	0.13
KH.L149.28.v1.A.nonSL3-1	50	101	131	110	78	43	135	83	91	83	1.44844	3.05786	3.49937	2.95024	2.22657	1.23194	3.58242	2.47585	2.81273	2.23632	2.11114	1.14439	0.843078	0.754708	2.90796	0.691111	1.13606	0.795072	Q3ZBG9	sp|Q3ZBG9|PLS2_BOVIN Phospholipid scramblase 2 OS=Bos taurus GN=PLSCR2 PE=2 SV=1	4e-49
KH.C4.633.v1.A.SL2-1	50	101	112	117	67	31	146	75	116	85	2.06505	4.35961	4.26547	4.47384	2.72676	1.26623	5.52364	3.18961	5.1118	3.26516	2.11114	0.978406	1.04885	0.609489	4.36228	0.577447	1.60264	0.638749	O35264	sp|O35264|PA1B2_RAT Platelet-activating factor acetylhydrolase IB subunit beta OS=Rattus norvegicus GN=Pafah1b2 PE=1 SV=1	3e-21
KH.C2.383.v1.A.ND1-1	55	111	121	124	52	29	203	95	115	59	1.92573	4.06182	3.90667	4.01966	1.7941	1.0042	6.5109	3.42509	4.29622	1.92137	2.10924	0.961801	1.02892	0.446332	6.48367	0.526055	1.25434	0.447223	Q8BGN2	sp|Q8BGN2|CD033_MOUSE UPF0462 protein C4orf33 homolog OS=Mus musculus GN=D3Ertd751e PE=2 SV=1	9e-26
KH.C10.596.v1.A.SL22-1	59	119	68	27	29	40	111	33	38	30	3.71783	7.83701	3.95126	1.5752	1.80072	2.4928	6.40728	2.14125	2.55492	1.75827	2.10795	0.504179	0.398659	1.14317	2.57031	0.334191	1.19319	0.688188	Q9Z336	sp|Q9Z336|DYLT1_RAT Dynein light chain Tctex-type 1 OS=Rattus norvegicus GN=Dynlt1 PE=1 SV=1	4e-42
KH.C4.396.v1.A.nonSL8-1	70	141	113	72	36	36	163	59	70	37	2.93657	6.18198	4.37129	2.79647	1.48819	1.4936	6.26388	2.54866	3.13326	1.44368	2.10517	0.707102	0.639735	0.532166	4.1938	0.406882	1.22938	0.460758	A7E2M3	sp|A7E2M3|EMC10_DANRE ER membrane protein complex subunit 10 OS=Danio rerio GN=emc10 PE=2 SV=1	5e-09
KH.C14.501.v1.A.SL1-1	71	143	188	411	319	68	199	288	315	357	1.19141	2.50787	2.90904	6.38527	5.27479	1.1285	3.05892	4.97636	5.63987	5.57182	2.10496	1.15996	2.19498	0.826087	2.71061	1.62683	1.13333	0.987933	A1L3I3	sp|A1L3I3|F1712_XENLA Protein FAM171A2 OS=Xenopus laevis GN=fam171a2 PE=2 SV=1	3.2
KH.C7.463.v1.C.SL1-1	301	606	566	352	151	163	744	236	350	205	16.3518	34.4064	28.3534	17.7043	8.08331	8.75746	37.0243	13.2017	20.2873	10.3581	2.10413	0.824074	0.624414	0.456574	4.22774	0.356568	1.53672	0.51057	Q5ZJY3	sp|Q5ZJY3|GARL3_CHICK GTPase-activating Rap/Ran-GAP domain-like protein 3 OS=Gallus gallus GN=GARNL3 PE=2 SV=1	2.8
KH.C11.327.v1.A.nonSL12-1	131	263	269	119	29	99	321	120	87	30	8.71546	18.2869	16.5029	7.32996	1.90121	6.51396	19.5631	8.22086	6.17582	1.85638	2.09822	0.902442	0.444162	0.259375	3.00326	0.420223	0.751238	0.300588	Q76LD0	sp|Q76LD0|CRDL1_RAT Chordin-like protein 1 OS=Rattus norvegicus GN=Chrdl1 PE=2 SV=2	0.57
KH.L71.18.v1.A.SL1-1	147	295	343	166	216	139	654	231	137	212	6.54882	13.7352	14.0906	6.84682	9.48224	6.12422	26.6892	10.5968	6.51212	8.7843	2.09735	1.02588	0.485915	1.38491	4.35798	0.397043	0.614537	1.34892	Q9FIF9	sp|Q9FIF9|RAA2D_ARATH Ras-related protein RABA2d OS=Arabidopsis thaliana GN=RABA2D PE=2 SV=1	8e-24
KH.C1.983.v1.A.ND1-1	98	196	150	62	63	86	186	100	71	63	1.97162	4.12117	2.78277	1.15485	1.24897	1.71115	3.42787	2.07164	1.5241	1.17887	2.09024	0.675239	0.414999	1.0815	2.00326	0.604353	0.735695	0.773485	O08876	sp|O08876|KLF10_RAT Krueppel-like factor 10 OS=Rattus norvegicus GN=Klf10 PE=2 SV=1	3e-36
KH.C12.677.v1.A.ND1-1	181	362	464	489	362	135	328	379	440	272	1.95625	4.08903	4.62436	4.89316	3.85537	1.44301	3.24737	4.21795	5.07404	2.73426	2.09024	1.13092	1.05813	0.78791	2.25042	1.29888	1.20296	0.538872	Q4LBC8	sp|Q4LBC8|TOIPA_ONCMY Toll-interacting protein A OS=Oncorhynchus mykiss GN=tollipa PE=2 SV=1	1.9
KH.C1.263.v1.B.nonSL3-1	571	1138	892	168	47	425	1189	279	101	46	90.4558	188.412	130.303	24.6402	7.33686	66.5855	172.542	45.5115	17.0717	6.77773	2.08292	0.691584	0.1891	0.297759	2.59129	0.26377	0.375108	0.397014	Q58DW0	sp|Q58DW0|RL4_BOVIN 60S ribosomal protein L4 OS=Bos taurus GN=RPL4 PE=2 SV=3	1e-27
KH.S902.3.v1.A.ND5-1	325	647	651	375	262	228	673	346	254	238	19.1231	39.7874	35.322	20.4288	15.1911	13.2679	36.2747	20.9637	15.9465	13.025	2.08059	0.887768	0.578358	0.743613	2.73403	0.577916	0.760671	0.816795	B9ENM6	sp|B9ENM6|UFM1_SALSA Ubiquitin-fold modifier 1 OS=Salmo salar GN=ufm1 PE=3 SV=1	7e-32
KH.C5.290.v2.A.SL1-1	1001	1992	1615	574	173	526	2275	645	512	240	60.229	125.264	89.6051	31.9756	10.2572	31.3002	125.391	39.9621	32.8698	13.431	2.0798	0.715329	0.35685	0.320783	4.00607	0.3187	0.822526	0.408612	Q5F339	sp|Q5F339|CCHL_CHICK Cytochrome c-type heme lyase OS=Gallus gallus GN=HCCS PE=2 SV=1	1e-57
KH.L112.7.v1.A.nonSL6-1	99	197	148	94	126	86	258	98	88	132	2.55579	5.31522	3.52322	2.24674	3.20532	2.19573	6.1013	2.60515	2.42398	3.16949	2.07968	0.662854	0.637694	1.42666	2.77872	0.426982	0.930457	1.30756	Q5U4T9	sp|Q5U4T9|MBOA7_XENLA Lysophospholipid acyltransferase 7 OS=Xenopus laevis GN=mboat7 PE=2 SV=1	2e-45
KH.C7.333.v1.A.SL1-1	77	153	241	379	352	50	312	236	371	406	1.71096	3.55309	4.93804	7.79693	7.70733	1.09878	6.35063	5.3998	8.79588	8.39076	2.07667	1.38979	1.57895	0.988508	5.77973	0.850278	1.62893	0.953941	P35352	sp|P35352|CAR3_DICDI Cyclic AMP receptor 3 OS=Dictyostelium discoideum GN=carC PE=2 SV=1	0.017
KH.C7.89.v1.A.SL2-1	71	141	113	81	72	47	315	77	107	113	2.83669	5.8876	4.16313	2.99622	2.83464	1.85713	11.5286	3.16782	4.56135	4.19911	2.07552	0.707102	0.719702	0.946072	6.20777	0.274779	1.4399	0.920586	P98160	sp|P98160|PGBM_HUMAN Basement membrane-specific heparan sulfate proteoglycan core protein OS=Homo sapiens GN=HSPG2 PE=1 SV=4	0.92
KH.C3.84.v1.A.ND1-1	136	270	260	250	300	167	392	222	211	309	2.51501	5.21831	4.43366	4.28031	5.4668	3.05427	6.64048	4.22737	4.16331	5.31477	2.07487	0.849635	0.965413	1.2772	2.17416	0.636606	0.984847	1.27657	Q91766	sp|Q91766|HNF4A_XENLA Hepatocyte nuclear factor 4-alpha OS=Xenopus laevis GN=hnf4a PE=2 SV=2	2e-105
KH.C14.314.v1.A.SL3-1	117	232	155	129	106	83	389	109	139	114	4.25778	8.82371	5.20137	4.34632	3.80115	2.98721	12.9676	4.08451	5.39719	3.85858	2.07237	0.589476	0.835611	0.874567	4.34104	0.314978	1.32138	0.714924	P61087	sp|P61087|UBE2K_MOUSE Ubiquitin-conjugating enzyme E2 K OS=Mus musculus GN=Ube2k PE=1 SV=3	4e-34
KH.C7.594.v1.C.SL2-2	108	214	168	361	376	91	508	362	294	360	2.42236	5.01643	3.47467	7.49648	8.31026	2.01858	10.4374	8.36066	7.03588	7.51006	2.07089	0.692657	2.15747	1.10856	5.17065	0.80103	0.841547	1.06739	Q9C6W5	sp|Q9C6W5|AB14G_ARATH ABC transporter G family member 14 OS=Arabidopsis thaliana GN=ABCG14 PE=2 SV=1	1e-32
KH.C2.224.v2.A.ND1-1	53	105	105	35	20	27	109	35	30	26	1.85141	3.83338	3.38224	1.13196	0.688443	0.932783	3.48792	1.25896	1.11816	0.844745	2.07052	0.882313	0.334676	0.608189	3.73926	0.360948	0.888163	0.755478	Q6P0S3	sp|Q6P0S3|TM45B_DANRE Transmembrane protein 45B OS=Danio rerio GN=tmem45b PE=2 SV=1	4e-16
KH.C3.129.v1.A.SL1-1	100	198	148	164	109	65	301	119	152	145	6.8131	14.0986	9.29812	10.3448	7.31784	4.37974	18.7856	8.3485	11.0495	9.18837	2.06934	0.659507	1.11257	0.707391	4.2892	0.44441	1.32354	0.831561	Q3B8G0	sp|Q3B8G0|CA123_XENLA UPF0587 protein C1orf123 homolog OS=Xenopus laevis PE=2 SV=1	1e-24
KH.L76.3.v1.C.ND1-1	235	465	441	295	159	147	650	229	258	209	6.99551	14.4667	12.1054	8.13034	4.66402	4.32772	17.7247	7.01946	8.1946	5.78661	2.068	0.836774	0.67163	0.573656	4.09561	0.396028	1.16741	0.706149	Q7YQK4	sp|Q7YQK4|LAT1_RABIT Large neutral amino acids transporter small subunit 1 OS=Oryctolagus cuniculus GN=SLC7A5 PE=1 SV=1	7e-34
KH.C12.363.v1.A.nonSL2-1	158	312	291	381	238	118	478	298	320	238	3.65417	7.54141	6.20603	8.15816	5.42401	2.69901	10.1268	7.09684	7.89656	5.11959	2.06378	0.822926	1.31455	0.664858	3.75205	0.700797	1.11269	0.648331	P58353	sp|P58353|GTR5_BOVIN Solute carrier family 2, facilitated glucose transporter member 5 OS=Bos taurus GN=SLC2A5 PE=2 SV=2	9e-21
KH.C1.230.v1.A.SL2-1	115	227	289	188	83	75	205	152	137	87	5.00992	10.3353	11.6097	7.58274	3.56306	3.23136	8.18088	6.81857	6.3681	3.52515	2.06298	1.1233	0.65314	0.469891	2.53172	0.833477	0.933935	0.553565	Q4V9P0	sp|Q4V9P0|SAMC_DANRE S-adenosylmethionine mitochondrial carrier protein OS=Danio rerio GN=slc25a26 PE=2 SV=1	9e-47
KH.C4.462.v1.A.SL1-1	76	150	166	182	75	47	215	152	195	84	4.72986	9.75646	9.52647	10.4868	4.59947	2.89283	12.2571	9.74082	12.9487	4.86228	2.06274	0.976426	1.1008	0.438598	4.23705	0.79471	1.32932	0.375504	Q8IWP9	sp|Q8IWP9|CC28A_HUMAN Coiled-coil domain-containing protein 28A OS=Homo sapiens GN=CCDC28A PE=2 SV=1	0.0001
KH.C3.214.v1.A.SL1-1	145	286	496	847	460	102	337	423	685	544	3.21248	6.62224	10.1331	17.3737	10.0425	2.23493	6.83937	9.65006	16.1927	11.2098	2.06141	1.53016	1.71454	0.578031	3.06022	1.41096	1.67799	0.692274	Q62277	sp|Q62277|SYPH_MOUSE Synaptophysin OS=Mus musculus GN=Syp PE=1 SV=2	1e-12
KH.C4.568.v1.A.nonSL3-1	70	138	158	141	171	56	188	104	81	154	1.59212	3.28037	3.31377	2.96914	3.83253	1.25967	3.91695	2.43572	1.9657	3.25779	2.06038	1.01018	0.896001	1.29078	3.10951	0.621841	0.807033	1.65732	Q0III2	sp|Q0III2|MBTP2_BOVIN Membrane-bound transcription factor site-2 protease OS=Bos taurus GN=MBTPS2 PE=2 SV=1	3e-21
KH.C2.649.v2.A.ND1-1	66	130	114	73	55	32	113	41	43	49	1.93295	3.97911	3.07872	1.9794	1.58727	0.926865	3.03157	1.23645	1.3437	1.33474	2.05857	0.773721	0.642931	0.801893	3.27078	0.407858	1.08674	0.993338	Q28295	sp|Q28295|VWF_CANFA von Willebrand factor OS=Canis familiaris GN=VWF PE=1 SV=2	0.3
KH.C9.163.v3.A.SL1-1	62	122	81	101	69	55	204	94	101	79	1.76115	3.62186	2.12168	2.65621	1.93138	1.54511	5.30822	2.74948	3.06114	2.08717	2.05653	0.585798	1.25194	0.727117	3.4355	0.517966	1.11335	0.681829	O88736	sp|O88736|DHB7_MOUSE 3-keto-steroid reductase OS=Mus musculus GN=Hsd17b7 PE=2 SV=1	5e-17
KH.C2.77.v1.A.nonSL10-1	1853	3645	2255	571	170	988	5167	912	655	251	108.608	223.28	121.877	30.9855	9.81856	57.2709	277.42	55.0425	40.9623	13.6832	2.05584	0.545848	0.254235	0.316876	4.844	0.198408	0.744194	0.334043	P05426	sp|P05426|RL7_RAT 60S ribosomal protein L7 OS=Rattus norvegicus GN=Rpl7 PE=1 SV=2	3e-58
KH.L39.7.v1.A.SL2-1	148	291	364	437	297	107	532	264	416	459	5.94982	12.2265	13.4937	16.2652	11.7655	4.25419	19.5915	10.9286	17.844	17.1625	2.05493	1.10365	1.20539	0.723355	4.60522	0.557822	1.63278	0.961809	Q3B8E5	sp|Q3B8E5|AP15B_XENLA Anaphase-promoting complex subunit 15B OS=Xenopus laevis GN=anapc15-b PE=2 SV=1	0.29
KH.C13.85.v1.A.SL1-1	141	277	331	369	376	143	409	267	383	443	3.64421	7.48222	7.88862	8.8297	9.576	3.6552	9.68324	7.10579	10.5618	10.6491	2.05318	1.05432	1.1193	1.08452	2.64917	0.733823	1.48637	1.00826	Q6AM16	sp|Q6AM16|PSTB_DESPS Phosphate import ATP-binding protein PstB OS=Desulfotalea psychrophila (strain LSv54 / DSM 12343) GN=pstB PE=3 SV=1	0.69
KH.C8.616.v1.A.nonSL12-1	288	565	522	241	49	216	642	212	193	96	19.4173	39.8118	32.4531	15.0435	3.25541	14.4026	39.6502	14.718	13.8839	6.01997	2.05032	0.815163	0.463546	0.216399	2.75299	0.371197	0.943324	0.433594	Q5DC69	sp|Q5DC69|CH10_SCHJA 10 kDa heat shock protein, mitochondrial OS=Schistosoma japonicum GN=SJCHGC01960 PE=3 SV=2	2e-21
KH.C1.1245.v1.A.SL1-1	52	102	104	62	46	25	188	82	66	83	2.21426	4.53932	4.08363	2.44428	1.93017	1.05282	7.33324	3.59547	2.99864	3.28722	2.05004	0.899613	0.598556	0.789665	6.96531	0.490297	0.834007	1.09624	Q60V90	sp|Q60V90|NDST_CAEBR Bifunctional heparan sulfate N-deacetylase/N-sulfotransferase 1 OS=Caenorhabditis briggsae GN=hst-1 PE=3 SV=3	0.18
KH.C1.280.v1.A.SL2-1	125	245	254	299	416	79	310	215	203	352	4.34642	8.90336	8.14412	9.62561	14.2537	2.71669	9.87408	7.69799	7.53137	11.3839	2.04844	0.914724	1.18191	1.48081	3.63461	0.779615	0.978356	1.51153	Q5HZE0	sp|Q5HZE0|MCATL_RAT Mitochondrial carnitine/acylcarnitine carrier protein CACL OS=Rattus norvegicus GN=Slc25a29 PE=2 SV=1	5e-51
KH.C4.515.v1.A.SL13-1	571	1119	679	115	1	276	1106	223	64	5	17.48	35.8015	19.1674	3.2594	0.0301659	8.35611	31.0151	7.02953	2.09046	0.142364	2.04814	0.53538	0.170049	0.00925505	3.71167	0.226649	0.297382	0.068102	Q14517	sp|Q14517|FAT1_HUMAN Protocadherin Fat 1 OS=Homo sapiens GN=FAT1 PE=1 SV=2	0.058
KH.C8.38.v5.A.SL2-2	74	145	196	263	212	74	263	182	193	204	1.75996	3.60417	4.29849	5.79112	4.96843	1.74058	5.72981	4.45717	4.89762	4.51261	2.04787	1.19264	1.34724	0.85794	3.2919	0.777892	1.09882	0.921388	Q8MJ44	sp|Q8MJ44|KAPCA_CANFA cAMP-dependent protein kinase catalytic subunit alpha OS=Canis familiaris GN=PRKACA PE=1 SV=3	1e-140
KH.C8.787.v2.A.ND2-1	73	143	124	205	148	56	164	156	149	147	2.35403	4.81939	3.68723	6.12039	4.70288	1.78595	4.84448	5.18002	5.12664	4.40893	2.04729	0.765082	1.65989	0.768395	2.71256	1.06926	0.989694	0.860004	Q6GR10	sp|Q6GR10|MAEA_XENLA Macrophage erythroblast attacher OS=Xenopus laevis GN=maea PE=2 SV=2	3e-69
KH.C12.646.v1.A.SL1-1	118	231	179	101	14	40	321	118	80	27	7.43566	15.213	10.4011	5.89242	0.869315	2.4928	18.5292	7.65661	5.37878	1.58244	2.04596	0.683697	0.566519	0.147531	7.43306	0.413219	0.702502	0.2942	Q99M71	sp|Q99M71|EPDR1_MOUSE Mammalian ependymin-related protein 1 OS=Mus musculus GN=Epdr1 PE=2 SV=1	1.9
KH.C2.626.v1.A.SL1-1	408	798	567	572	790	295	1069	401	555	716	13.4929	27.5813	17.2909	17.5137	25.7445	9.64846	32.3845	13.6555	19.5837	22.0234	2.04413	0.626907	1.01288	1.46997	3.35644	0.421668	1.43413	1.12458	P96236	sp|P96236|GLPQ1_MYCTU Probable glycerophosphoryl diester phosphodiesterase 1 OS=Mycobacterium tuberculosis GN=glpQ1 PE=2 SV=3	9e-10
KH.S584.2.v3.A.SL3-2	67	131	230	401	630	67	266	262	284	652	1.34675	2.75201	4.26313	7.46263	12.4786	1.33192	4.89787	5.42289	6.09098	12.1895	2.04344	1.5491	1.7505	1.67214	3.6773	1.10719	1.1232	2.00124	Q9R050	sp|Q9R050|SSBP3_RAT Single-stranded DNA-binding protein 3 OS=Rattus norvegicus GN=Ssbp3 PE=2 SV=1	4e-14
KH.C2.1106.v1.A.SL2-1	66	129	196	251	285	47	138	208	250	301	1.68466	3.44131	4.61331	5.93167	7.16844	1.18647	3.22671	5.46699	6.8087	7.14596	2.04273	1.34057	1.28577	1.2085	2.71959	1.69429	1.24542	1.04953	Q5ZJR8	sp|Q5ZJR8|ELOV6_CHICK Elongation of very long chain fatty acids protein 6 OS=Gallus gallus GN=ELOVL6 PE=2 SV=1	2e-35
KH.C8.343.v1.A.SL1-1	359	700	715	671	620	312	1384	537	578	726	6.66336	13.5788	12.2375	11.5307	11.3397	5.72722	23.5314	10.2634	11.4468	12.5332	2.03784	0.90122	0.942243	0.983436	4.1087	0.436156	1.1153	1.09491	P47809	sp|P47809|MP2K4_MOUSE Dual specificity mitogen-activated protein kinase kinase 4 OS=Mus musculus GN=Map2k4 PE=1 SV=2	4e-92
KH.C7.606.v1.A.SL1-1	1336	2602	2043	1250	838	870	4274	1129	1450	879	66.009	134.36	93.0795	57.1797	40.7993	42.5115	193.439	57.4391	76.4401	40.3935	2.03548	0.692761	0.614311	0.713528	4.55028	0.296936	1.3308	0.528434	Q90XG0	sp|Q90XG0|TPISB_DANRE Triosephosphate isomerase B OS=Danio rerio GN=tpi1b PE=2 SV=1	7e-75
KH.L154.56.v1.A.SL1-1	183	356	375	758	905	149	639	580	628	1136	3.52817	7.17323	6.66682	13.5302	17.1933	2.84103	11.2853	11.5145	12.9186	20.3705	2.03313	0.929403	2.02948	1.27074	3.97226	1.02031	1.12194	1.57684	Q5MNV6	sp|Q5MNV6|ZNT7_CHICK Zinc transporter 7 OS=Gallus gallus GN=SLC30A7 PE=2 SV=1	7e-33
KH.C8.199.v1.A.ND1-1	326	634	584	277	90	232	818	259	308	93	23.1507	47.0545	38.2426	18.2121	6.29796	16.2939	53.2123	18.9392	23.3374	6.14263	2.03253	0.81273	0.476226	0.345812	3.26579	0.355918	1.23223	0.26321
KH.C7.595.v1.A.nonSL2-1	54	105	128	158	290	55	184	130	193	396	1.59076	3.2327	3.47703	4.30926	8.41821	1.60237	4.96525	3.94339	6.0663	10.85	2.03218	1.07558	1.23935	1.95352	3.09869	0.794199	1.53834	1.78858	Q5XJX0	sp|Q5XJX0|JGN1A_DANRE Protein jagunal homolog 1-A OS=Danio rerio GN=jagn1a PE=2 SV=1	0.0004
KH.C2.564.v1.A.ND2-1	144	280	709	957	757	154	422	762	657	814	1.49467	3.03743	6.78605	9.19664	7.74265	1.58086	4.01243	8.1443	7.27619	7.85837	2.03218	2.23414	1.35523	0.8419	2.53813	2.02977	0.893408	1.08001	F1QH17	sp|F1QH17|MCA3A_DANRE Protein-methionine sulfoxide oxidase mical3a OS=Danio rerio GN=mical3a PE=2 SV=2	1e-22
KH.C3.223.v1.A.nonSL13-1	179	348	271	141	37	111	376	98	106	47	14.1043	28.6579	19.6905	10.2861	2.87284	8.64992	27.1394	7.95136	8.9117	3.44447	2.03185	0.687088	0.522392	0.279293	3.13753	0.292983	1.12078	0.386511	Q93105	sp|Q93105|INSR_AEDAE Insulin-like receptor OS=Aedes aegypti GN=InR PE=2 SV=2	0.027
KH.S595.14.v1.A.nonSL29-1	107	208	224	76	39	90	228	87	56	40	3.5646	7.24197	6.8812	2.3441	1.28028	2.96524	6.95786	2.98444	1.99054	1.23941	2.03164	0.950183	0.340653	0.54617	2.34647	0.428932	0.666973	0.622647	Q9H8Y8	sp|Q9H8Y8|GORS2_HUMAN Golgi reassembly-stacking protein 2 OS=Homo sapiens GN=GORASP2 PE=1 SV=3	1e-76
KH.C10.507.v1.A.nonSL3-1	71	138	143	120	55	63	287	98	151	80	3.17866	6.457	5.90351	4.97396	2.42639	2.78944	11.7701	4.51782	7.21305	3.33121	2.03136	0.914281	0.842542	0.487818	4.21953	0.383838	1.59658	0.461831	P68037	sp|P68037|UB2L3_MOUSE Ubiquitin-conjugating enzyme E2 L3 OS=Mus musculus GN=Ube2l3 PE=2 SV=1	7e-40
KH.C8.74.v2.A.SL4-1	395	767	775	609	742	340	1378	504	497	639	7.77424	15.7769	14.0654	11.0972	14.3905	6.61805	24.8441	10.2143	10.437	11.6974	2.02938	0.891516	0.788973	1.29677	3.75399	0.411135	1.0218	1.12076	Q9P0J7	sp|Q9P0J7|KCMF1_HUMAN E3 ubiquitin-protein ligase KCMF1 OS=Homo sapiens GN=KCMF1 PE=1 SV=2	2e-48
KH.C9.224.v2.A.SL5-1	85	165	90	103	113	65	174	63	68	125	1.88134	3.81679	1.83688	2.11067	2.46456	1.42283	3.52786	1.43584	1.60588	2.57326	2.02876	0.481262	1.14906	1.16766	2.47947	0.407001	1.11843	1.6024	Q91XT5	sp|Q91XT5|BCDO1_RAT Beta,beta-carotene 15,15'-monooxygenase OS=Rattus norvegicus GN=Bcmo1 PE=2 SV=1	4e-48
KH.C11.75.v1.C.ND2-2	509	987	864	360	173	224	1170	275	313	206	69.0459	139.928	108.074	45.2124	23.1248	30.051	145.385	38.4122	45.3023	25.9904	2.02659	0.772359	0.418346	0.51147	4.83794	0.264211	1.17937	0.57371	Q0SMV7	sp|Q0SMV7|DNLJ_BORAP DNA ligase OS=Borrelia afzelii (strain PKo) GN=ligA PE=3 SV=1	2.1
KH.C4.515.v1.A.nonSL15-1	581	1126	710	106	2	305	1129	252	58	4	17.6312	35.7117	19.868	2.97816	0.0598065	9.1537	31.3844	7.87452	1.87798	0.1129	2.02548	0.556343	0.149897	0.0200817	3.4286	0.250906	0.238488	0.0601176	O75094	sp|O75094|SLIT3_HUMAN Slit homolog 3 protein OS=Homo sapiens GN=SLIT3 PE=2 SV=3	1
KH.C2.850.v1.A.ND1-1	2400	4641	4328	1539	554	1318	5591	1610	1271	681	86.4365	174.688	143.735	51.3168	19.6611	46.9452	184.454	59.7074	48.8413	22.8118	2.021	0.822808	0.357024	0.383132	3.92913	0.323698	0.818011	0.467058	Q9CWU9	sp|Q9CWU9|NUP37_MOUSE Nucleoporin Nup37 OS=Mus musculus GN=Nup37 PE=2 SV=2	2e-16
KH.C9.88.v3.A.SL6-1	165	319	232	102	60	87	324	115	93	73	7.15375	14.4546	9.27528	4.09435	2.56338	3.73044	12.8679	5.1341	4.30219	2.94374	2.02057	0.641682	0.441427	0.626077	3.44944	0.398985	0.837963	0.684242	Q9Z255	sp|Q9Z255|UBE2A_MOUSE Ubiquitin-conjugating enzyme E2 A OS=Mus musculus GN=Ube2a PE=2 SV=1	5e-56
KH.C8.192.v2.A.ND3-2	101	195	202	282	290	75	315	222	324	293	2.42117	4.88546	4.46524	6.25877	6.85038	1.7781	6.91717	5.47992	8.28716	6.53278	2.01781	0.913986	1.40166	1.09452	3.8902	0.79222	1.51228	0.788301	Q60972	sp|Q60972|RBBP4_MOUSE Histone-binding protein RBBP4 OS=Mus musculus GN=Rbbp4 PE=1 SV=5	0
KH.C8.713.v1.A.SL1-1	115	222	246	499	415	92	402	413	492	429	2.17368	4.38548	4.28768	8.73241	7.72962	1.71979	6.96045	8.03832	9.92247	7.54191	2.01754	0.977698	2.03663	0.885165	4.04726	1.15486	1.2344	0.760084	Q16881	sp|Q16881|TRXR1_HUMAN Thioredoxin reductase 1, cytoplasmic OS=Homo sapiens GN=TXNRD1 PE=1 SV=3	2e-132
KH.L149.41.v1.A.SL1-1	387	746	763	512	311	178	1103	453	503	315	9.88937	19.9234	17.9792	12.1133	7.83123	4.4985	25.8194	11.9199	13.7146	7.48676	2.01462	0.902419	0.673739	0.646498	5.73956	0.461664	1.15056	0.545899	Q60HH9	sp|Q60HH9|HEM2_MACFA Delta-aminolevulinic acid dehydratase OS=Macaca fascicularis GN=ALAD PE=2 SV=2	1e-74
KH.C9.410.v1.C.nonSL24-1	325	626	464	127	35	174	565	184	121	41	28.2626	56.8943	37.2079	10.2251	2.99922	14.9647	45.0081	16.4764	11.2272	3.31618	2.01306	0.653983	0.27481	0.29332	3.00761	0.366077	0.681408	0.295371	P29117	sp|P29117|PPIF_RAT Peptidyl-prolyl cis-trans isomerase F, mitochondrial OS=Rattus norvegicus GN=Ppif PE=1 SV=2	1e-17
KH.C4.179.v1.A.SL2-1	76	146	84	53	36	39	182	54	53	40	4.54867	9.1325	4.63595	2.93685	2.12317	2.30848	9.97826	3.32798	3.38456	2.22667	2.00773	0.507632	0.633495	0.722942	4.32245	0.333523	1.017	0.657891	Q39163	sp|Q39163|TGA5_ARATH Transcription factor TGA5 OS=Arabidopsis thaliana GN=TGA5 PE=1 SV=2	1.6
KH.C3.46.v1.C.ND1-1	177	340	549	691	523	107	326	466	681	349	22.9781	46.1303	65.7207	83.0528	66.9044	13.7377	38.7678	62.2936	94.3288	42.1398	2.00758	1.42468	1.26372	0.805565	2.822	1.60684	1.51426	0.446733	P19560	sp|P19560|POL_BIV29 Gag-Pol polyprotein OS=Bovine immunodeficiency virus (strain R29) GN=gag-pol PE=1 SV=2	1.2
KH.C8.632.v1.A.nonSL6-1	87	167	151	119	160	74	236	102	137	169	1.84106	3.69345	2.94656	2.33148	3.33643	1.54872	4.57483	2.22263	3.09333	3.32631	2.00615	0.79778	0.791255	1.43103	2.95395	0.485838	1.39175	1.07532	Q8WU17	sp|Q8WU17|RN139_HUMAN E3 ubiquitin-protein ligase RNF139 OS=Homo sapiens GN=RNF139 PE=1 SV=1	9e-41
KH.L34.6.v1.C.nonSL20-1	681	1305	829	333	101	418	1589	341	310	143	34.2824	68.6595	38.4828	15.5204	5.01022	20.8109	73.2759	17.6764	16.6511	6.69554	2.00276	0.560488	0.403307	0.322815	3.52104	0.241232	0.941991	0.402109	Q07954	sp|Q07954|LRP1_HUMAN Prolow-density lipoprotein receptor-related protein 1 OS=Homo sapiens GN=LRP1 PE=1 SV=2	0.0001
KH.C2.250.v1.A.ND1-1	71	136	136	164	56	54	124	84	94	30	5.51768	11.0459	9.74598	11.7999	4.28842	4.15032	8.8274	6.72193	7.79439	2.16843	2.00192	0.882313	1.21074	0.36343	2.12692	0.761485	1.15955	0.278204	P24583	sp|P24583|KPC1_YEAST Protein kinase C-like 1 OS=Saccharomyces cerevisiae (strain ATCC 204508 / S288c) GN=PKC1 PE=1 SV=3	0.45
KH.S555.7.v1.A.SL1-1	407	779	973	1113	1343	353	1381	775	926	1306	7.66736	15.3375	16.9026	19.4125	24.931	6.57683	23.8319	15.0338	18.6131	22.8834	2.00036	1.10204	1.14849	1.28427	3.62361	0.630829	1.23808	1.22942	Q9PTE6	sp|Q9PTE6|TPST1_DANRE Protein-tyrosine sulfotransferase 1 OS=Danio rerio GN=tpst1 PE=2 SV=2	5e-80
Downregulated genes in late stage I-early II	Set 1 (reads)					Set 2 (reads)					Set 1 (RPKM)					Set 2 (RPKM)					Set 1 (Ratio)				Set 2 (Ratio)
Gene ID	early I	late I-early II	early II-late II	late II-late III	IV	early I	late I-early II	early II-late II	late II-late III	IV	early I	late I-early II	early II-late II	late II-late III	IV	early I	late I-early II	early II-late II	late II-late III	IV	late I-early II/early I	early II-late II/late I-early II	late II-late III/early II-late II	IV/late II-late III	late I-early II/early I	early II-late II/late I-early II	late II-late III/early II-late II	IV/late II-late III	UniProt ID	Homologous protein	E-value
KH.C1.342.v1.A.ND1-1	1338	10	33	325	173	1083	15	361	344	225	126.557	0.988546	2.87828	28.4609	16.1246	101.309	1.29968	35.1605	34.7173	19.7943	0.00781106	2.91163	9.88817	0.566552	0.0128288	27.0533	0.987395	0.570156	Q9A301	sp|Q9A301|COXX_CAUCR Protoheme IX farnesyltransferase OS=Caulobacter crescentus (strain ATCC 19089 / CB15) GN=ctaB PE=3 SV=1	0.41
KH.C4.631.v1.A.SL1-1	2481	49	97	1779	296	2837	188	309	1034	160	107.876	2.2267	3.88919	71.6159	12.6824	121.997	7.48807	13.8348	47.9706	6.4706	0.0206412	1.74662	18.4141	0.177089	0.0613792	1.84758	3.46738	0.134887	Q9WVA4	sp|Q9WVA4|TAGL2_MOUSE Transgelin-2 OS=Mus musculus GN=Tagln2 PE=1 SV=4	3e-21
KH.L71.26.v1.A.SL2-1	100	2	3	2	0	136	6	1	1	0	2.57427	0.0538084	0.0712137	0.0476671	0	3.46245	0.141488	0.0265076	0.0274669	0	0.0209024	1.32347	0.669353	0	0.0408635	0.187349	1.03619	0	Q8CH60	sp|Q8CH60|GNRHR_CAVPO Gonadotropin-releasing hormone receptor OS=Cavia porcellus GN=GNRHR PE=2 SV=2	6e-08
KH.C2.743.v1.A.ND1-1	648	18	31	686	185	761	46	86	484	115	15.7	0.455789	0.692588	15.3881	4.41681	18.2347	1.02093	2.14556	12.512	2.59148	0.0290311	1.51954	22.2182	0.287028	0.0559881	2.10157	5.83158	0.20712	Q9CYL5	sp|Q9CYL5|GAPR1_MOUSE Golgi-associated plant pathogenesis-related protein 1 OS=Mus musculus GN=Glipr2 PE=2 SV=3	6e-14
KH.C9.512.v2.A.ND2-1	456	13	28	347	47	645	19	54	100	49	6.26632	0.186705	0.354809	4.41481	0.63644	8.76592	0.239174	0.764114	1.46624	0.626281	0.0297951	1.90037	12.4428	0.14416	0.0272845	3.1948	1.91887	0.427136	Q62468	sp|Q62468|VILI_MOUSE Villin-1 OS=Mus musculus GN=Vil1 PE=1 SV=3	1e-100
KH.C7.755.v1.A.ND1-1	193	7	12	318	251	362	15	41	147	220	2.55456	0.0968331	0.146464	3.89692	3.27375	4.73869	0.181871	0.558805	2.07603	2.70837	0.0379059	1.51254	26.6068	0.840085	0.03838	3.07253	3.71512	1.30459	Q5VU97	sp|Q5VU97|CAHD1_HUMAN VWFA and cache domain-containing protein 1 OS=Homo sapiens GN=CACHD1 PE=2 SV=2	7e-13
KH.C2.916.v1.A.ND1-1	375	14	7	203	67	573	18	6	70	86	13.9837	0.545612	0.2407	7.00844	2.46194	21.1317	0.614859	0.230387	2.78512	2.98273	0.0390178	0.441156	29.1168	0.351282	0.0290965	0.374699	12.0889	1.07095	Q5RB30	sp|Q5RB30|Z585B_PONAB Zinc finger protein 585B OS=Pongo abelii GN=ZNF585B PE=2 SV=1	3.3
KH.C9.887.v1.B.SL1-1	106	4	11	67	44	139	10	23	23	32	1.27558	0.0503069	0.122063	0.746468	0.521754	1.65427	0.110234	0.285001	0.295315	0.35816	0.0394385	2.42636	6.11545	0.698964	0.0666359	2.58542	1.03619	1.21281	Q8NFW9	sp|Q8NFW9|MYRIP_HUMAN Rab effector MyRIP OS=Homo sapiens GN=MYRIP PE=1 SV=2	6e-10
KH.C10.191.v2.A.ND1-2	158	6	12	493	374	184	6	39	341	320	5.92593	0.235189	0.41502	17.1191	13.8224	6.82508	0.206141	1.50619	13.6461	11.1629	0.0396881	1.76463	41.2489	0.807424	0.0302034	7.30663	9.06002	0.818022	Q5DTW2	sp|Q5DTW2|SMBT2_MOUSE Scm-like with four MBT domains protein 2 OS=Mus musculus GN=Sfmbt2 PE=1 SV=2	4.9
KH.C10.588.v1.A.SL1-1	150	6	22	1387	1357	219	10	48	493	1440	2.457	0.102714	0.332296	21.0342	21.9031	3.54771	0.150047	0.809603	8.61623	21.9383	0.0418048	3.23515	63.2995	1.04131	0.042294	5.39566	10.6425	2.54616	B1WAZ6	sp|B1WAZ6|PA24A_XENTR Cytosolic phospholipase A2 OS=Xenopus tropicalis GN=pla2g4a PE=2 SV=1	4e-14
KH.L139.9.v1.A.SL3-1	125	5	73	1053	726	108	27	168	510	763	3.43236	0.143489	1.84839	26.7698	19.644	2.9329	0.67914	4.75016	14.942	19.4865	0.0418048	12.8818	14.4828	0.733812	0.23156	6.99438	3.14558	1.30414	P17507	sp|P17507|EF1A2_XENLA Elongation factor 1-alpha, oocyte form OS=Xenopus laevis GN=eef1ao PE=1 SV=1	5e-175
KH.S1440.1.v1.A.nonSL1-1	374	17	1	1	0	200	9	2	0	0	13.4911	0.640902	0.0332633	0.0333973	0	7.13505	0.297394	0.0742888	0	0	0.0475055	0.0519008	1.00403	0	0.0416807	0.249799	0	#DIV/0!	O15998	sp|O15998|ACTM_CIOSA Actin, muscle OS=Ciona savignyi PE=2 SV=1	0
KH.C10.187.v1.A.SL1-1	162	8	22	68	40	122	19	46	80	49	10.9877	0.567082	1.37595	4.27006	2.67339	8.18352	1.18047	3.21266	5.78943	3.09109	0.0516109	2.42636	3.10336	0.626077	0.14425	2.7215	1.80207	0.533919	Q3B748	sp|Q3B748|LLPH_DANRE Protein LLP homolog OS=Danio rerio GN=llph PE=2 SV=1	4e-09
KH.C14.181.v1.B.SL2-1	160	8	22	239	205	304	20	70	91	169	1.64603	0.0860152	0.208704	2.27642	2.07819	3.09302	0.188479	0.741539	0.998888	1.61708	0.052256	2.42636	10.9074	0.91292	0.0609367	3.93434	1.34705	1.61888	Q27J81	sp|Q27J81|INF2_HUMAN Inverted formin-2 OS=Homo sapiens GN=INF2 PE=1 SV=2	6e-44
KH.S521.5.v2.B.SL1-1	264	14	52	632	258	357	17	135	304	280	8.27756	0.458768	1.50346	18.3464	7.97132	11.0702	0.488271	4.35862	10.1702	8.16549	0.055423	3.27716	12.2028	0.43449	0.0441066	8.92665	2.33335	0.802886	Q61233	sp|Q61233|PLSL_MOUSE Plastin-2 OS=Mus musculus GN=Lcp1 PE=1 SV=4	3e-67
KH.C7.426.v1.A.nonSL2-1	152	10	20	38	19	102	10	22	38	14	5.35096	0.36792	0.649242	1.23853	0.659103	3.55123	0.322479	0.797494	1.42734	0.458397	0.0687579	1.76463	1.90766	0.532166	0.0908077	2.47301	1.78978	0.321155	Q2NL37	sp|Q2NL37|BCCIP_BOVIN BRCA2 and CDKN1A-interacting protein OS=Bos taurus GN=BCCIP PE=2 SV=1	2e-05
KH.C14.483.v1.C.SL1-1	315	21	23	53	33	218	42	45	50	47	12.6747	0.883107	0.853384	1.97442	1.30844	8.67511	1.54807	1.86448	2.14662	1.75894	0.0696747	0.966343	2.31363	0.662697	0.17845	1.20439	1.15132	0.819403	P0C6U5	sp|P0C6U5|R1A_CVHN5 Replicase polyprotein 1a OS=Human coronavirus HKU1 (isolate N5) GN=1a PE=3 SV=1	0.003
KH.C1.77.v1.A.SL1-1	306	22	74	150	230	264	49	109	137	191	4.04551	0.303977	0.902137	1.83603	2.99635	3.45181	0.593419	1.48387	1.93254	2.34861	0.0751393	2.96778	2.03519	1.63197	0.171915	2.50054	1.30237	1.2153	Q01804	sp|Q01804|OTUD4_HUMAN OTU domain-containing protein 4 OS=Homo sapiens GN=OTUD4 PE=1 SV=3	2e-19
KH.C1.40.v2.A.SL2-1	137	10	32	271	95	111	28	73	424	157	6.10332	0.465598	1.31457	11.1776	4.17043	4.89056	1.14266	3.34877	20.1543	6.50535	0.0762861	2.8234	8.50287	0.373105	0.233646	2.93068	6.01842	0.322778	O88974	sp|O88974|SETB1_MOUSE Histone-lysine N-methyltransferase SETDB1 OS=Mus musculus GN=Setdb1 PE=1 SV=1	0.55
KH.C1.324.v2.A.SL5-1	108	8	21	123	10	127	19	9	25	6	5.2785	0.408642	0.946443	5.56579	0.481613	6.13876	0.850655	0.452945	1.30372	0.272749	0.0774163	2.31607	5.88074	0.086531	0.138571	0.532467	2.87831	0.209209	O14735	sp|O14735|CDIPT_HUMAN CDP-diacylglycerol--inositol 3-phosphatidyltransferase OS=Homo sapiens GN=CDIPT PE=1 SV=1	1e-36
KH.C11.282.v1.C.SL1-1	175	14	3	69	35	265	32	4	40	32	9.28424	0.776252	0.146764	3.38916	1.82974	13.9042	1.55515	0.218517	2.26425	1.57901	0.0836096	0.189067	23.0927	0.539878	0.111848	0.140512	10.3619	0.697364	P42125	sp|P42125|ECI1_MOUSE Enoyl-CoA delta isomerase 1, mitochondrial OS=Mus musculus GN=Eci1 PE=1 SV=2	1e-14
KH.C10.450.v1.A.SL1-1	359	29	16	703	1866	361	49	20	459	1869	10.7149	0.904604	0.440355	19.4261	54.8805	10.656	1.33969	0.614669	14.6172	51.8836	0.0844247	0.486793	44.1145	2.8251	0.125722	0.458815	23.7806	3.54949	Q13133	sp|Q13133|NR1H3_HUMAN Oxysterols receptor LXR-alpha OS=Homo sapiens GN=NR1H3 PE=1 SV=2	3.8
KH.S1642.2.v1.A.nonSL4-1	162	14	33	140	113	111	30	97	126	118	4.10042	0.370346	0.770222	3.28078	2.81841	2.7786	0.695581	2.52814	3.40283	2.77793	0.090319	2.07974	4.25952	0.859067	0.250335	3.63458	1.34598	0.816359	Q9JKX4	sp|Q9JKX4|AATF_MOUSE Protein AATF OS=Mus musculus GN=Aatf PE=1 SV=1	7e-23
KH.C8.287.v1.B.SL4-1	265	23	11	168	253	268	16	17	107	210	11.8758	1.07723	0.454566	6.97043	11.1724	11.8779	0.656823	0.784478	5.11629	8.75307	0.0907085	0.421976	15.3343	1.60283	0.0552978	1.19435	6.5219	1.71082	O60911	sp|O60911|CATL2_HUMAN Cathepsin L2 OS=Homo sapiens GN=CTSV PE=1 SV=2	4.9
KH.S424.2.v1.A.nonSL2-1	217	19	49	149	358	138	50	108	154	288	3.15927	0.289099	0.657827	2.00839	5.13596	1.98699	0.666822	1.61908	2.39223	3.89983	0.0915082	2.27544	3.05307	2.55725	0.335594	2.42805	1.47753	1.6302	Q9EQZ6	sp|Q9EQZ6|RPGF4_MOUSE Rap guanine nucleotide exchange factor 4 OS=Mus musculus GN=Rapgef4 PE=1 SV=1	2e-35
KH.S256.9.v1.B.ND3-1	559	50	3	218	468	428	26	0	59	416	24.9524	2.33258	0.123484	9.00932	20.5853	18.8945	1.06313	0	2.81001	17.2711	0.0934812	0.0529388	72.9595	2.28489	0.0562668	0	#DIV/0!	6.14626	Q0ADW4	sp|Q0ADW4|GUAA_NITEC GMP synthase [glutamine-hydrolyzing] OS=Nitrosomonas eutropha (strain C91) GN=guaA PE=3 SV=1	1.9
KH.C5.63.v2.A.nonSL13-1	233	21	53	100	74	189	55	92	113	77	7.56742	0.712816	1.58729	3.00696	2.36829	6.07078	1.63632	3.07678	3.91586	2.32599	0.0941954	2.22679	1.89439	0.787605	0.26954	1.88031	1.27271	0.593994	Q02508	sp|Q02508|HGV2_HALRO Protein HGV2 OS=Halocynthia roretzi GN=HGV2 PE=2 SV=1	4e-41
KH.C2.611.v1.A.nonSL2-1	319	29	58	631	359	298	57	61	377	377	17.0235	1.61742	2.85414	31.1762	18.8784	15.7277	2.78642	3.35201	21.4663	18.7122	0.0950109	1.76463	10.9231	0.605539	0.177166	1.20298	6.404	0.871705	P47032	sp|P47032|PRY1_YEAST Protein PRY1 OS=Saccharomyces cerevisiae (strain ATCC 204508 / S288c) GN=PRY1 PE=1 SV=1	5e-06
KH.C2.376.v1.A.SL2-1	195	18	47	141	196	137	43	127	149	198	2.98981	0.288435	0.664501	2.00153	2.96126	2.0774	0.603935	2.00507	2.43754	2.82358	0.0964726	2.30382	3.01209	1.4795	0.290717	3.32001	1.21569	1.15837	P17480	sp|P17480|UBF1_HUMAN Nucleolar transcription factor 1 OS=Homo sapiens GN=UBTF PE=1 SV=1	8e-24
KH.L37.7.v2.A.ND1-1	173	16	23	58	32	135	32	52	44	33	6.42997	0.621511	0.788278	1.99584	1.17199	4.96234	1.0895	1.99014	1.7449	1.14078	0.0966585	1.26832	2.5319	0.587217	0.219553	1.82666	0.876776	0.653779	Q9D0I8	sp|Q9D0I8|MRT4_MOUSE mRNA turnover protein 4 homolog OS=Mus musculus GN=Mrto4 PE=2 SV=1	3e-51
KH.C9.234.v1.A.ND2-1	291	27	45	265	431	369	34	64	191	407	7.65198	0.742012	1.09114	6.45152	11.1679	9.59617	0.81898	1.73292	5.35884	9.95409	0.0969699	1.47052	5.91262	1.73104	0.0853445	2.11595	3.09238	1.85751	Q8IID4	sp|Q8IID4|DYHC2_PLAF7 Dynein heavy chain-like protein PF11_0240 OS=Plasmodium falciparum (isolate 3D7) GN=PF11_0240 PE=3 SV=1	0.52
KH.C11.57.v1.C.ND1-1	2994	281	371	1842	892	3187	306	333	1446	1100	248.442	24.3695	28.3881	141.514	72.9374	261.545	23.2599	28.4534	128.026	84.897	0.0980891	1.1649	4.98496	0.515409	0.0889328	1.22328	4.49949	0.663123	Q8I7C3	sp|Q8I7C3|LASP1_DROME LIM and SH3 domain protein Lasp OS=Drosophila melanogaster GN=Lasp PE=1 SV=2	2e-09
KH.C1.147.v1.A.ND1-1	202	19	33	129	183	143	20	85	109	134	1.85189	0.182047	0.278976	1.09494	1.6532	1.29655	0.16796	0.802416	1.06622	1.1426	0.0983034	1.53244	3.92484	1.50987	0.129544	4.77741	1.32876	1.07164	P41000	sp|P41000|CPS3_SCHPO Protein cps3 OS=Schizosaccharomyces pombe (strain 972 / ATCC 24843) GN=cps3 PE=1 SV=3	0.0003
KH.C1.896.v1.A.SL1-1	201	19	51	228	219	142	46	131	182	192	3.88512	0.383821	0.909008	4.08017	4.17124	2.71449	0.814479	2.60734	3.7535	3.45172	0.0987924	2.36831	4.4886	1.02232	0.300049	3.20123	1.43959	0.919601	Q61282	sp|Q61282|PGCA_MOUSE Aggrecan core protein OS=Mus musculus GN=Acan PE=1 SV=2	0.053
KH.L3.7.v1.C.SL2-1	198	19	30	64	47	124	63	64	71	40	7.63473	0.765682	1.06669	2.28478	1.78582	4.72869	2.22527	2.54112	2.92108	1.43455	0.100289	1.39313	2.14193	0.781618	0.470589	1.14194	1.14952	0.491101	Q3UZW7	sp|Q3UZW7|FA86A_MOUSE Protein FAM86A OS=Mus musculus GN=Fam86a PE=2 SV=1	4e-11
KH.C11.61.v3.A.SL2-1	206	20	14	25	10	119	63	28	29	11	10.8275	1.09864	0.678541	1.21656	0.51793	6.18581	3.03328	1.51542	1.62635	0.537747	0.101468	0.617619	1.79291	0.425732	0.490361	0.499599	1.0732	0.330647	P08432	sp|P08432|DCOR_YEAST Ornithine decarboxylase OS=Saccharomyces cerevisiae (strain ATCC 204508 / S288c) GN=SPE1 PE=1 SV=1	3.2
KH.C8.286.v1.A.ND1-1	328	32	51	137	54	209	43	128	149	54	9.80259	0.999501	1.40548	3.79073	1.59028	6.17737	1.1772	3.93907	4.75127	1.50102	0.101963	1.40619	2.6971	0.419517	0.190566	3.34615	1.20619	0.31592	Q8EUL1	sp|Q8EUL1|UVRA_MYCPE UvrABC system protein A OS=Mycoplasma penetrans (strain HF-2) GN=uvrA PE=3 SV=1	3.4
KH.C2.702.v1.A.SL3-1	112	11	28	267	204	149	19	84	181	195	2.35362	0.241589	0.542581	5.19474	4.22435	3.09667	0.36575	1.81766	4.05838	3.81134	0.102646	2.24589	9.57414	0.813197	0.118111	4.96969	2.23274	0.93913	Q5FWK3	sp|Q5FWK3|RHG01_MOUSE Rho GTPase-activating protein 1 OS=Mus musculus GN=Arhgap1 PE=1 SV=1	4e-57
KH.C5.299.v2.A.ND1-1	183	18	48	344	199	223	59	97	305	245	8.20911	0.843886	1.98552	14.2869	8.7965	9.89328	2.42443	4.48057	14.5983	10.222	0.102799	2.35283	7.19554	0.615703	0.245059	1.84809	3.25812	0.700222	Q6P8Y1	sp|Q6P8Y1|CAPSL_MOUSE Calcyphosin-like protein OS=Mus musculus GN=Capsl PE=2 SV=4	2e-45
KH.L63.18.v1.B.SL2-1	257	26	38	355	211	332	59	160	185	228	2.21789	0.234502	0.302398	2.83642	1.79433	2.83358	0.466415	1.42182	1.70347	1.83007	0.105732	1.28953	9.37975	0.632602	0.164603	3.0484	1.19809	1.07432	Q9Z173	sp|Q9Z173|LPHN3_RAT Latrophilin-3 OS=Rattus norvegicus GN=Lphn3 PE=2 SV=1	0.011
KH.C10.13.v1.A.nonSL3-1	217	22	32	44	17	157	39	62	41	15	4.83365	0.512158	0.657286	0.907409	0.373144	3.45864	0.79578	1.42208	0.974441	0.310765	0.105957	1.28336	1.38054	0.411219	0.230085	1.78703	0.685223	0.318917	Q9BBP1	sp|Q9BBP1|NU6C_LOTJA NAD(P)H-quinone oxidoreductase subunit 6, chloroplastic OS=Lotus japonicus GN=ndhG PE=3 SV=1	0.037
KH.L13.12.v4.A.SL1-1	167	17	46	123	87	205	46	62	86	79	3.00011	0.31918	0.762023	2.04579	1.54011	3.64221	0.756994	1.14691	1.64845	1.32	0.106389	2.38743	2.68469	0.75282	0.207839	1.51509	1.4373	0.800752	Q7TNG5	sp|Q7TNG5|EMAL2_MOUSE Echinoderm microtubule-associated protein-like 2 OS=Mus musculus GN=Eml2 PE=2 SV=1	7e-134
KH.L55.7.v1.A.SL2-1	300	31	53	131	104	185	62	136	170	118	12.6556	1.36675	2.06171	5.11645	4.32322	7.71835	2.39589	5.90769	7.65186	4.62988	0.107996	1.50847	2.48166	0.844965	0.310415	2.46576	1.29524	0.605066	Q66H19	sp|Q66H19|SRFB1_RAT Serum response factor-binding protein 1 OS=Rattus norvegicus GN=Srfbp1 PE=2 SV=1	9e-05
KH.L149.9.v1.A.SL1-1	304	32	50	161	156	183	41	119	200	227	12.7178	1.39912	1.92884	6.2359	6.43094	7.57146	1.57121	5.12627	8.92738	8.83262	0.110013	1.37861	3.23297	1.03128	0.207518	3.26262	1.7415	0.989385	Q9VGP1	sp|Q9VGP1|ZFY26_DROME Zinc finger FYVE domain-containing protein 26 homolog OS=Drosophila melanogaster GN=CG5270 PE=1 SV=3	8.8
KH.C5.63.v1.A.ND2-1	294	31	50	121	76	194	67	110	153	96	7.69514	0.848002	1.20678	2.93217	1.96017	5.02182	1.60641	2.96469	4.27284	2.33704	0.1102	1.42309	2.42975	0.668505	0.319886	1.84553	1.44125	0.546952	Q02508	sp|Q02508|HGV2_HALRO Protein HGV2 OS=Halocynthia roretzi GN=HGV2 PE=2 SV=1	2e-44
KH.C11.117.v1.A.nonSL2-1	128	14	27	101	114	116	36	82	114	112	2.70996	0.309775	0.527115	1.97974	2.37831	2.42885	0.698181	1.78765	2.57522	2.20545	0.11431	1.7016	3.75581	1.20132	0.287453	2.56044	1.44056	0.856412	Q76MT4	sp|Q76MT4|ESF1_RAT ESF1 homolog OS=Rattus norvegicus GN=Esf1 PE=1 SV=1	2e-30
KH.C2.662.v1.A.SL1-1	484	53	159	611	477	353	94	486	553	506	5.84764	0.669233	1.77142	6.83457	5.67891	4.21794	1.04034	6.04628	7.1288	5.68606	0.114445	2.64694	3.85825	0.83091	0.246647	5.81182	1.17904	0.797618	Q28C74	sp|Q28C74|LPPRC_XENTR Leucine-rich PPR motif-containing protein, mitochondrial OS=Xenopus tropicalis GN=lrpprc PE=2 SV=1	5e-05
KH.S621.4.v1.A.SL2-1	255	28	29	236	38	258	40	13	73	39	7.897	0.906246	0.82815	6.76658	1.15962	7.90191	1.13474	0.414555	2.41213	1.12334	0.114758	0.913824	8.17072	0.171375	0.143603	0.365331	5.81861	0.465705	O44252	sp|O44252|ROST_DROME Protein rolling stone OS=Drosophila melanogaster GN=rost PE=2 SV=2	0.031
KH.C2.252.v1.A.SL1-1	435	48	21	1017	1328	457	57	43	486	1226	13.078	1.50821	0.582185	28.308	39.3426	13.5881	1.56979	1.33118	15.59	34.2823	0.115324	0.386012	48.6237	1.38981	0.115526	0.848003	11.7114	2.19899	P11982	sp|P11982|TY3H_PHASP Tyrosine 3-monooxygenase OS=Phasianidae sp. GN=TH PE=3 SV=1	2e-67
KH.C4.479.v1.A.nonSL11-1	225	25	58	116	82	156	66	102	140	96	7.47368	0.867877	1.77651	3.56734	2.68397	5.12468	2.00821	3.48874	4.96177	2.96585	0.116124	2.04697	2.00806	0.752372	0.39187	1.73724	1.42222	0.597741	Q7T3B0	sp|Q7T3B0|EIF3M_DANRE Eukaryotic translation initiation factor 3 subunit M OS=Danio rerio GN=eif3m PE=2 SV=2	1e-49
KH.S546.2.v1.A.SL2-1	143	16	41	206	220	139	16	126	208	243	4.19619	0.490688	1.10941	5.59656	6.36141	4.03389	0.430083	3.80721	6.51236	6.6321	0.116937	2.26093	5.04464	1.13666	0.106617	8.85226	1.71054	1.01839	Q2TE74	sp|Q2TE74|PCS2_LOTJA Glutathione gamma-glutamylcysteinyltransferase 2 OS=Lotus japonicus GN=PCS2 PE=2 SV=2	4e-34
KH.C3.82.v2.A.nonSL3-1	140	16	18	236	169	176	43	52	257	202	9.17944	1.09641	1.0883	14.3263	10.9191	11.4128	2.58268	3.51082	17.9795	12.3187	0.119442	0.992602	13.1639	0.762169	0.226297	1.35937	5.12117	0.685153	Q9CQV6	sp|Q9CQV6|MLP3B_MOUSE Microtubule-associated proteins 1A/1B light chain 3B OS=Mus musculus GN=Map1lc3b PE=1 SV=3	8e-42
KH.C11.83.v1.A.ND2-1	166	19	35	129	119	122	31	88	145	121	8.9429	1.06977	1.73871	6.43421	6.31727	6.50011	1.52984	4.88169	8.33479	6.06292	0.119622	1.62531	3.70057	0.981825	0.235356	3.19098	1.70736	0.727423	Q5QJE6	sp|Q5QJE6|TDIF2_HUMAN Deoxynucleotidyltransferase terminal-interacting protein 2 OS=Homo sapiens GN=DNTTIP2 PE=1 SV=2	3e-23
KH.C3.310.v1.A.SL4-1	244	28	89	215	258	154	63	157	204	189	4.96182	0.59508	1.6689	4.04785	5.16991	3.09715	1.17356	3.28751	4.42627	3.57469	0.119932	2.80449	2.42546	1.2772	0.378916	2.80132	1.34639	0.807609	Q1HFZ0	sp|Q1HFZ0|NSUN2_MOUSE tRNA (cytosine(34)-C(5))-methyltransferase OS=Mus musculus GN=Nsun2 PE=1 SV=2	2e-111
KH.C5.137.v1.A.SL5-1	183	21	45	138	129	126	44	118	144	146	5.96919	0.715895	1.35352	4.16753	4.14635	4.06467	1.31471	3.96335	5.01167	4.42938	0.119932	1.89067	3.07902	0.994918	0.323448	3.01462	1.2645	0.883812	Q9CSU0	sp|Q9CSU0|RPR1B_MOUSE Regulation of nuclear pre-mRNA domain-containing protein 1B OS=Mus musculus GN=Rprd1b PE=1 SV=2	9e-37
KH.C10.272.v1.A.SL2-1	182	21	57	270	181	188	98	104	236	138	11.7129	1.41247	3.38265	16.0876	11.4785	11.9658	5.77741	6.89198	16.2055	8.26035	0.120591	2.39485	4.75593	0.713496	0.482826	1.19292	2.35135	0.509726	B5X9L9	sp|B5X9L9|PGFS_SALSA Prostamide/prostaglandin F synthase OS=Salmo salar GN=fam213b PE=2 SV=1	4e-23
KH.C1.699.v1.A.ND2-1	225	26	62	274	287	145	47	207	298	264	3.34782	0.404314	0.850667	3.77455	4.20797	2.13372	0.640605	3.17151	4.73099	3.6535	0.120769	2.10398	4.43716	1.11483	0.300229	4.95081	1.49171	0.772249	Q09666	sp|Q09666|AHNK_HUMAN Neuroblast differentiation-associated protein AHNAK OS=Homo sapiens GN=AHNAK PE=1 SV=2	0.69
KH.C1.61.v2.A.ND1-1	242	28	27	839	634	272	30	16	282	632	9.237	1.11697	0.950316	29.6492	23.8461	10.2677	1.04894	0.628858	11.4847	22.4367	0.120923	0.850802	31.1993	0.804274	0.102159	0.599518	18.2629	1.95361	P24855	sp|P24855|DNAS1_HUMAN Deoxyribonuclease-1 OS=Homo sapiens GN=DNASE1 PE=1 SV=1	6e-28
KH.C7.165.v1.A.SL8-1	180	21	32	86	80	144	40	69	75	77	3.62135	0.441554	0.593659	1.60189	1.58599	2.86517	0.737176	1.42943	1.60996	1.44084	0.121931	1.34448	2.69833	0.990075	0.257288	1.93907	1.12629	0.894951	Q9NXZ2	sp|Q9NXZ2|DDX43_HUMAN Probable ATP-dependent RNA helicase DDX43 OS=Homo sapiens GN=DDX43 PE=2 SV=2	2e-78
KH.C2.496.v1.A.nonSL3-1	162	19	18	38	22	102	21	33	51	20	4.25987	0.522157	0.436458	0.925124	0.570054	2.6526	0.50584	0.893536	1.43089	0.489144	0.122576	0.835875	2.11962	0.616192	0.190696	1.76644	1.60138	0.341845	O95568	sp|O95568|MET18_HUMAN Histidine protein methyltransferase 1 homolog OS=Homo sapiens GN=METTL18 PE=1 SV=1	3e-08
KH.C11.94.v1.A.nonSL11-1	221	26	53	137	112	154	41	110	131	121	4.89627	0.602022	1.08277	2.81015	2.44514	3.3743	0.83209	2.50947	3.09671	2.49336	0.122955	1.79856	2.59532	0.87011	0.246596	3.01587	1.23401	0.805163	Q562C7	sp|Q562C7|K0020_RAT Pumilio domain-containing protein KIAA0020 homolog OS=Rattus norvegicus PE=2 SV=1	1e-40
KH.C4.479.v1.A.nonSL9-1	229	27	46	91	91	180	48	115	144	85	7.55668	0.931163	1.39972	2.78018	2.95903	5.87434	1.45094	3.9076	5.07008	2.6088	0.123224	1.5032	1.98623	1.06433	0.246997	2.69315	1.29749	0.514548	Q7T3B0	sp|Q7T3B0|EIF3M_DANRE Eukaryotic translation initiation factor 3 subunit M OS=Danio rerio GN=eif3m PE=2 SV=2	6e-49
KH.C14.319.v1.A.SL1-1	353	42	81	251	224	255	47	192	301	233	10.9096	1.35659	2.30837	7.18193	6.8217	7.79405	1.33059	6.11013	9.92556	6.69752	0.124349	1.7016	3.11125	0.949841	0.170718	4.59205	1.62444	0.674775	A5EWY8	sp|A5EWY8|RBFA_DICNV Ribosome-binding factor A OS=Dichelobacter nodosus (strain VCS1703A) GN=rbfA PE=3 SV=1	1.2
KH.S1965.2.v1.A.SL1-1	929	111	278	1350	1816	740	111	853	1296	1789	20.8471	2.60327	5.75259	28.0478	40.1567	16.423	2.28174	19.7104	31.0307	37.3393	0.124874	2.20976	4.87568	1.43172	0.138936	8.63833	1.57433	1.2033	Q08D62	sp|Q08D62|MAEL_XENTR Protein maelstrom homolog OS=Xenopus tropicalis GN=mael PE=2 SV=1	6e-05
KH.C14.146.v2.A.SL2-1	667	81	166	592	41	777	213	171	230	35	23.8703	3.02959	5.47809	19.6151	1.44587	27.5007	6.98273	6.30152	8.78247	1.165	0.126919	1.8082	3.58063	0.0737121	0.253911	0.902444	1.39371	0.132651	Q9CYL5	sp|Q9CYL5|GAPR1_MOUSE Golgi-associated plant pathogenesis-related protein 1 OS=Mus musculus GN=Glipr2 PE=2 SV=3	7e-18
KH.L93.6.v1.R.ND2-1	214	26	47	100	111	158	44	96	95	119	4.70438	0.597349	0.952741	2.03528	2.40449	3.43507	0.886042	2.17308	2.22827	2.43311	0.126977	1.59495	2.13623	1.18141	0.25794	2.45257	1.0254	1.09193	Q9Y2X3	sp|Q9Y2X3|NOP58_HUMAN Nucleolar protein 58 OS=Homo sapiens GN=NOP58 PE=1 SV=1	1e-111
KH.C12.383.v1.A.SL1-1	164	20	51	114	90	104	40	117	127	81	5.84148	0.744518	1.67509	3.75941	3.15888	3.66356	1.30513	4.29123	4.82658	2.68343	0.127454	2.2499	2.2443	0.840261	0.356246	3.28798	1.12475	0.555969	B5X2B8	sp|B5X2B8|ERAL1_SALSA GTPase Era, mitochondrial OS=Salmo salar GN=eral1 PE=2 SV=1	2e-13
KH.S534.4.v1.A.SL1-1	418	51	22	198	185	302	55	8	61	122	34.4334	4.39076	1.67115	15.1009	15.0171	24.6037	4.1503	0.678595	5.36154	9.34737	0.127515	0.380606	9.03626	0.994451	0.168686	0.163505	7.90095	1.74341	P42325	sp|P42325|NCAH_DROME Neurocalcin homolog OS=Drosophila melanogaster GN=Nca PE=1 SV=2	6e-19
KH.L108.18.v1.B.nonSL3-1	188	23	41	96	72	140	48	98	65	83	4.23979	0.542101	0.852627	2.00444	1.60004	3.12252	0.99161	2.27577	1.56407	1.74097	0.12786	1.57282	2.3509	0.798248	0.317567	2.29503	0.687269	1.1131	Q99LL5	sp|Q99LL5|PWP1_MOUSE Periodic tryptophan protein 1 homolog OS=Mus musculus GN=Pwp1 PE=1 SV=1	2e-30
KH.C13.55.v1.A.SL2-1	147	18	43	152	167	100	27	128	196	167	3.59231	0.459722	0.968978	3.43903	4.02147	2.41684	0.604413	3.22095	5.11057	3.79576	0.127974	2.10775	3.54913	1.16936	0.250084	5.32905	1.58667	0.742728	Q76FK4	sp|Q76FK4|NOL8_HUMAN Nucleolar protein 8 OS=Homo sapiens GN=NOL8 PE=1 SV=1	0.0002
KH.L144.12.v1.A.ND2-1	155	19	24	35	8	113	30	19	13	14	1.4661	0.187824	0.20933	0.306503	0.0745646	1.05706	0.259935	0.185055	0.131199	0.123164	0.128111	1.1145	1.46421	0.243276	0.245904	0.711928	0.708972	0.938759	Q2PC93	sp|Q2PC93|SSPO_CHICK SCO-spondin OS=Gallus gallus GN=SSPO PE=2 SV=1	9e-84
KH.C8.554.v1.A.SL1-1	595	73	91	215	176	359	116	222	278	193	26.8771	3.44631	3.79049	8.99164	7.83412	16.038	4.79995	10.3261	13.3988	8.10865	0.128225	1.09987	2.37216	0.871266	0.299286	2.15129	1.29757	0.605177	Q3SZZ0	sp|Q3SZZ0|BRX1_BOVIN Ribosome biogenesis protein BRX1 homolog OS=Bos taurus GN=BRIX1 PE=2 SV=1	1e-59
KH.C4.276.v1.A.nonSL2-1	202	25	50	130	72	120	27	115	149	81	5.06477	0.65511	1.15602	3.01777	1.7789	2.97564	0.620133	2.96909	3.98612	1.88894	0.129347	1.76463	2.61048	0.589476	0.208404	4.78782	1.34254	0.47388	Q5R8W8	sp|Q5R8W8|PTCD3_PONAB Pentatricopeptide repeat domain-containing protein 3, mitochondrial OS=Pongo abelii GN=PTCD3 PE=2 SV=1	0.013
KH.L171.6.v1.A.SL2-1	474	59	84	295	246	281	89	254	399	252	14.0363	1.82597	2.29373	8.08783	7.17831	8.22947	2.41423	7.74507	12.6068	6.94067	0.130089	1.25617	3.52606	0.887544	0.293364	3.2081	1.62772	0.550551	Q6GL69	sp|Q6GL69|MK67I_XENTR MKI67 FHA domain-interacting nucleolar phosphoprotein-like OS=Xenopus tropicalis GN=mki67ipl PE=2 SV=1	6e-22
KH.C3.690.v1.C.SL2-1	241	30	60	195	206	161	60	135	200	214	6.47628	0.842551	1.48679	4.85153	5.45491	4.27883	1.47698	3.73559	5.73449	5.3487	0.130098	1.76463	3.2631	1.12437	0.345182	2.52922	1.5351	0.932725	Q52KK4	sp|Q52KK4|NAF1_RAT H/ACA ribonucleoprotein complex non-core subunit NAF1 OS=Rattus norvegicus GN=Naf1 PE=2 SV=1	1e-14
KH.L8.22.v2.A.SL2-1	184	23	44	123	115	132	42	103	103	84	2.55878	0.334279	0.564231	1.58364	1.57589	1.81543	0.535029	1.47492	1.5283	1.08648	0.13064	1.6879	2.80672	0.995106	0.294712	2.75671	1.03619	0.710905	Q9NZ71	sp|Q9NZ71|RTEL1_HUMAN Regulator of telomere elongation helicase 1 OS=Homo sapiens GN=RTEL1 PE=1 SV=2	4e-96
KH.L119.4.v1.A.ND1-1	1558	197	249	865	679	1435	184	691	965	734	41.6943	5.50988	6.14465	21.4319	17.9057	37.9797	4.51066	19.0416	27.5545	18.2697	0.132149	1.11521	3.48789	0.835469	0.118765	4.22147	1.44707	0.663038	Q4V9P9	sp|Q4V9P9|NOL11_DANRE Nucleolar protein 11-like OS=Danio rerio GN=nol11 PE=2 SV=1	0.73
KH.S999.2.v1.A.SL3-1	166	21	40	149	161	119	32	120	165	189	4.73018	0.625395	1.05104	3.93089	4.52071	3.35356	0.835281	3.52101	5.0166	5.00907	0.132214	1.6806	3.74001	1.15005	0.249072	4.21536	1.42476	0.998499	P51949	sp|P51949|MAT1_MOUSE CDK-activating kinase assembly factor MAT1 OS=Mus musculus GN=Mnat1 PE=2 SV=2	4e-33
KH.C9.389.v1.A.SL1-1	158	20	31	158	314	112	37	72	113	323	3.31107	0.438033	0.599047	3.06551	6.48414	2.32123	0.710273	1.55367	2.52665	6.29563	0.132294	1.36758	5.11731	2.11519	0.305989	2.18743	1.62624	2.49169	Q9Z0H0	sp|Q9Z0H0|CDC7_MOUSE Cell division cycle 7-related protein kinase OS=Mus musculus GN=Cdc7 PE=1 SV=2	2e-21
KH.C6.103.v2.A.SL2-1	110	14	6	72	66	142	23	4	42	58	3.52959	0.469489	0.17753	2.13894	2.08683	4.5062	0.67604	0.132163	1.43793	1.73095	0.133015	0.378134	12.0484	0.975637	0.150025	0.195495	10.88	1.20378	Q8WZ42	sp|Q8WZ42|TITIN_HUMAN Titin OS=Homo sapiens GN=TTN PE=1 SV=4	0.28
KH.C11.94.v1.A.nonSL3-1	251	32	54	144	116	190	34	121	162	100	5.55549	0.740226	1.10213	2.95084	2.52999	4.15903	0.689351	2.75772	3.82578	2.05861	0.133242	1.4889	2.67741	0.857378	0.165748	4.00046	1.3873	0.53809	Q562C7	sp|Q562C7|K0020_RAT Pumilio domain-containing protein KIAA0020 homolog OS=Rattus norvegicus PE=2 SV=1	2e-41
KH.C9.465.v1.A.SL1-1	148	19	14	126	22	218	21	18	29	23	4.27644	0.573773	0.373024	3.37075	0.626405	6.2297	0.555844	0.535562	0.894076	0.618122	0.134171	0.650125	9.03626	0.185836	0.0892248	0.963511	1.66942	0.691352	Q96P44	sp|Q96P44|COLA1_HUMAN Collagen alpha-1(XXI) chain OS=Homo sapiens GN=COL21A1 PE=2 SV=1	0.0003
KH.C11.514.v1.A.ND1-1	558	72	137	391	364	353	85	353	496	364	14.8539	2.00311	3.36292	9.63649	9.54817	9.29334	2.07271	9.67605	14.0879	9.01227	0.134854	1.67885	2.86551	0.990835	0.223032	4.66831	1.45595	0.639719
KH.L4.19.v1.A.SL1-1	131	17	12	115	70	140	19	8	22	62	3.16546	0.429319	0.267384	2.57275	1.66677	3.34567	0.420564	0.199054	0.56721	1.39342	0.135626	0.622809	9.62195	0.647854	0.125704	0.473304	2.84952	2.45662	A8F4T2	sp|A8F4T2|KAD_THELT Adenylate kinase OS=Thermotoga lettingae (strain ATCC BAA-301 / DSM 14385 / TMO) GN=adk PE=3 SV=1	0.04
KH.C9.168.v1.A.SL1-1	169	22	40	198	267	119	27	136	209	286	3.7369	0.508409	0.815592	4.05345	5.81765	2.60233	0.546892	3.09656	4.93091	5.88188	0.136051	1.60421	4.96995	1.43523	0.210155	5.66212	1.59238	1.19286	Q4UMH6	sp|Q4UMH6|Y381_RICFE Putative ankyrin repeat protein RF_0381 OS=Rickettsia felis (strain ATCC VR-1525 / URRWXCal2) GN=RF_0381 PE=4 SV=1	5e-19
KH.C3.19.v3.C.SL4-2	192	25	36	101	125	119	48	123	134	117	7.8938	1.07421	1.36482	3.84451	5.06415	4.83863	1.80775	5.20723	5.87822	4.47401	0.136083	1.27053	2.81686	1.31724	0.373609	2.8805	1.12886	0.761116	P46087	sp|P46087|NOP2_HUMAN Putative ribosomal RNA methyltransferase NOP2 OS=Homo sapiens GN=NOP2 PE=1 SV=2	5e-62
KH.C3.213.v1.A.SL1-1	593	78	145	427	496	414	133	337	432	473	19.3428	2.65904	4.36135	12.8952	15.9425	13.3553	3.97401	11.3191	15.035	14.35	0.137469	1.6402	2.95669	1.23632	0.29756	2.84827	1.32829	0.954436	Q3T0M7	sp|Q3T0M7|RANG_BOVIN Ran-specific GTPase-activating protein OS=Bos taurus GN=RANBP1 PE=2 SV=1	2e-30
KH.C14.318.v1.A.nonSL6-1	242	32	42	93	113	157	48	124	96	101	4.06839	0.562243	0.651097	1.44752	1.87197	2.61034	0.7392	2.14658	1.72201	1.57926	0.138198	1.15804	2.22321	1.29322	0.283181	2.90392	0.802212	0.917106	Q5XHZ0	sp|Q5XHZ0|TRAP1_RAT Heat shock protein 75 kDa, mitochondrial OS=Rattus norvegicus GN=Trap1 PE=1 SV=1	2e-125
KH.C4.310.v4.A.ND1-1	151	20	31	152	132	137	31	114	164	151	3.57065	0.494273	0.67596	3.32774	3.07579	3.20392	0.671499	2.77583	4.13781	3.32104	0.138426	1.36758	4.92298	0.924288	0.209587	4.13377	1.49066	0.802607	Q8NG48	sp|Q8NG48|LINES_HUMAN Protein Lines homolog OS=Homo sapiens GN=LINS PE=2 SV=2	1.3
KH.C6.160.v1.B.SL1-1	166	22	47	126	102	124	53	105	159	141	5.1198	0.709142	1.33669	3.59791	3.09996	3.78231	1.49739	3.33465	5.23236	4.04473	0.13851	1.88494	2.69165	0.861601	0.395892	2.22698	1.56909	0.773022	Q8R1N4	sp|Q8R1N4|NUDC3_MOUSE NudC domain-containing protein 3 OS=Mus musculus GN=Nudcd3 PE=2 SV=3	7e-31
KH.C1.145.v2.A.nonSL3-1	444	59	99	294	279	321	65	261	315	317	11.7297	1.629	2.41172	7.19092	7.26304	8.38683	1.573	7.10002	8.8791	7.7891	0.138879	1.48049	2.98166	1.01003	0.187556	4.51368	1.25057	0.87724	O60832	sp|O60832|DKC1_HUMAN H/ACA ribonucleoprotein complex subunit 4 OS=Homo sapiens GN=DKC1 PE=1 SV=3	4e-111
KH.C5.292.v1.A.SL1-1	510	68	142	455	540	266	111	305	301	460	4.12766	0.575186	1.05977	3.40942	4.30665	2.12915	0.822943	2.54185	2.5993	3.46272	0.139349	1.84248	3.21714	1.26316	0.386513	3.08873	1.0226	1.33217	Q587J7	sp|Q587J7|TDR12_HUMAN Tudor domain-containing protein 12 OS=Homo sapiens GN=TDRD12 PE=2 SV=2	0.015
KH.C8.644.v1.A.ND2-1	292	39	69	161	104	166	61	111	121	101	13.9113	1.94185	3.03126	7.10145	4.88237	7.8214	2.66213	5.44535	6.15074	4.47541	0.139588	1.56102	2.34274	0.687518	0.340365	2.04549	1.12954	0.727622	Q7ZYG5	sp|Q7ZYG5|MK16B_XENLA Protein MAK16 homolog B OS=Xenopus laevis GN=mak16-b PE=2 SV=1	1e-58
KH.C8.800.v1.A.ND1-1	356	48	82	219	125	251	73	179	243	123	7.76569	1.0943	1.64942	4.42292	2.6869	5.41494	1.4587	4.02068	5.65578	2.49552	0.140915	1.50728	2.68149	0.607495	0.269384	2.75635	1.40667	0.441233	Q4R5Q4	sp|Q4R5Q4|ECSIT_MACFA Evolutionarily conserved signaling intermediate in Toll pathway, mitochondrial OS=Macaca fascicularis GN=ECSIT PE=2 SV=1	6e-06
KH.C2.1126.v1.A.ND1-1	103	14	0	58	84	132	12	2	18	47	4.55281	0.64675	0	2.37359	3.65876	5.77041	0.485889	0.091031	0.848929	1.93226	0.142055	0	#DIV/0!	1.54145	0.0842035	0.187349	9.32571	2.27612	Q9FI61	sp|Q9FI61|UBC27_ARATH Ubiquitin-conjugating enzyme E2 27 OS=Arabidopsis thaliana GN=UBC27 PE=2 SV=1	2e-21
KH.S1653.2.v1.A.ND1-1	13065	1782	5907	19238	33587	25272	2070	18656	21975	34540	862.882	123.003	359.748	1176.35	2185.88	1650.72	125.235	1268.75	1548.56	2121.73	0.142549	2.9247	3.26994	1.85818	0.0758671	10.131	1.22053	1.37013	Q9LW86	sp|Q9LW86|SUT34_ARATH Probable sulfate transporter 3.4 OS=Arabidopsis thaliana GN=SULTR3;4 PE=2 SV=1	0.98
KH.C3.152.v3.B.nonSL4-3	183	25	56	214	232	123	62	193	269	219	3.75507	0.536134	1.05961	4.06552	4.69102	2.4961	1.16539	4.07795	5.88947	4.17962	0.142776	1.97638	3.83683	1.15385	0.466884	3.4992	1.44422	0.709678	Q4H2R2	sp|Q4H2R2|SSRP1_CIOIN FACT complex subunit SSRP1 OS=Ciona intestinalis GN=SSRP1 PE=2 SV=1	0
KH.C6.52.v1.A.ND1-1	270	37	85	243	182	221	62	217	209	195	2.02264	0.289683	0.587168	1.68537	1.3435	1.63733	0.425461	1.67391	1.67054	1.35867	0.14322	2.02693	2.87034	0.797153	0.25985	3.93434	0.99799	0.813313	O60287	sp|O60287|NPA1P_HUMAN Nucleolar pre-ribosomal-associated protein 1 OS=Homo sapiens GN=URB1 PE=1 SV=4	6e-24
KH.C12.595.v1.A.ND1-1	145	20	38	188	5	234	65	34	56	9	5.73758	0.827098	1.38654	6.88738	0.194959	9.15729	2.35607	1.38534	2.36431	0.33123	0.144154	1.67639	4.9673	0.0283067	0.257288	0.587989	1.70667	0.140095	Q9JI76	sp|Q9JI76|ADA21_MOUSE Disintegrin and metalloproteinase domain-containing protein 21 OS=Mus musculus GN=Adam21 PE=2 SV=1	5e-13
KH.C3.749.v1.C.SL1-1	888	123	150	289	60	743	226	365	281	72	14.9508	2.16433	2.3288	4.5049	0.995442	12.3718	3.48557	6.32794	5.04795	1.12749	0.144763	1.07599	1.93443	0.220968	0.281736	1.81547	0.797725	0.223355	Q5RDK1	sp|Q5RDK1|TEX10_PONAB Testis-expressed sequence 10 protein OS=Pongo abelii GN=TEX10 PE=2 SV=1	7e-10
KH.C10.517.v1.A.SL2-1	1264	176	250	471	450	591	275	447	515	441	44.7058	6.50573	8.15354	15.4232	15.6835	20.6726	8.9097	16.2795	19.4348	14.5071	0.145523	1.25329	1.89159	1.01688	0.430991	1.82717	1.19382	0.74645	Q9UHK0	sp|Q9UHK0|NUFP1_HUMAN Nuclear fragile X mental retardation-interacting protein 1 OS=Homo sapiens GN=NUFIP1 PE=1 SV=2	5e-16
KH.C8.304.v1.A.SL1-1	192	27	36	1049	831	197	48	66	1103	1049	8.58733	1.26208	1.48473	43.4378	36.6243	8.71392	1.96658	3.03961	52.6367	43.6373	0.14697	1.17642	29.2563	0.843145	0.225682	1.54563	17.3169	0.829029	P38892	sp|P38892|CRG1_YEAST Probable S-adenosylmethionine-dependent methyltransferase CRG1 OS=Saccharomyces cerevisiae (strain ATCC 204508 / S288c) GN=CRG1 PE=1 SV=1	2e-07
KH.L87.26.v1.A.ND1-1	831	118	181	820	34	814	152	69	431	36	24.0576	3.57026	4.83192	21.9786	0.969935	23.306	4.03096	2.05692	13.3133	0.96935	0.148405	1.35338	4.54864	0.0441308	0.172959	0.510281	6.47243	0.0728106	Q87FV4	sp|Q87FV4|MDTL_VIBPA Multidrug resistance protein MdtL OS=Vibrio parahaemolyticus serotype O3:K6 (strain RIMD 2210633) GN=mdtL PE=3 SV=1	3.6
KH.C2.123.v1.A.ND1-1	352	50	75	221	203	265	90	169	227	227	10.9308	1.62273	2.14764	6.35387	6.21182	8.13856	2.56016	5.40399	7.52131	6.55636	0.148455	1.32347	2.95854	0.977644	0.314572	2.1108	1.39181	0.871705	Q80X60	sp|Q80X60|EFCB3_MOUSE EF-hand calcium-binding domain-containing protein 3 OS=Mus musculus GN=Efcab3 PE=2 SV=1	0.018
KH.L22.38.v3.A.nonSL4-1	140	20	42	202	224	117	31	135	201	235	4.01201	0.599005	1.10987	5.35946	6.32549	3.31597	0.813784	3.98369	6.14592	6.26366	0.149303	1.85286	4.8289	1.18025	0.245414	4.89526	1.54277	1.01916	Q68FX5	sp|Q68FX5|SNPC2_RAT snRNA-activating protein complex subunit 2 OS=Rattus norvegicus GN=Snapc2 PE=2 SV=1	0.37
KH.C2.521.v1.A.SL1-1	461	66	80	680	332	366	103	69	293	318	27.2671	4.07988	4.36331	37.2376	19.3503	21.4096	5.58069	4.20246	18.491	17.4941	0.149627	1.06947	8.53425	0.519644	0.260663	0.753036	4.40005	0.946083	Q4VX76	sp|Q4VX76|SYTL3_HUMAN Synaptotagmin-like protein 3 OS=Homo sapiens GN=SYTL3 PE=2 SV=3	0.14
KH.C4.82.v1.A.SL1-1	635	91	212	783	550	446	177	606	885	704	20.8933	3.12925	6.43216	23.8522	17.8323	14.513	5.33481	20.5316	31.0693	21.5442	0.149773	2.0555	3.70828	0.747614	0.367588	3.8486	1.51325	0.693424	Q5RE15	sp|Q5RE15|PSMD8_PONAB 26S proteasome non-ATPase regulatory subunit 8 (Fragment) OS=Pongo abelii GN=PSMD8 PE=2 SV=2	7e-52
KH.C8.13.v1.A.SL1-1	313	45	153	639	552	229	63	348	577	559	7.14055	1.07292	3.2186	13.4966	12.409	5.1667	1.31656	8.17491	14.0449	11.8611	0.150257	2.99986	4.1933	0.919422	0.254817	6.2093	1.71805	0.844512	Q96IR7	sp|Q96IR7|HPDL_HUMAN 4-hydroxyphenylpyruvate dioxygenase-like protein OS=Homo sapiens GN=HPDL PE=1 SV=1	2e-07
KH.C5.136.v1.A.ND1-1	166	24	44	191	140	154	23	92	140	133	3.13113	0.473119	0.765305	3.33551	2.60216	2.87279	0.397406	1.78689	2.81759	2.3333	0.151102	1.61757	4.3584	0.780138	0.138334	4.49639	1.57681	0.82812	Q5ZKI2	sp|Q5ZKI2|DPH2_CHICK Diphthamide biosynthesis protein 2 OS=Gallus gallus GN=DPH2 PE=2 SV=1	7e-29
KH.L9.14.v1.A.SL2-1	152	22	12	20	3	112	43	8	6	2	4.13614	0.625664	0.301108	0.503869	0.0804424	3.01412	1.07185	0.22416	0.174205	0.0506184	0.151267	0.481262	1.67338	0.15965	0.355609	0.209134	0.777143	0.290568	Q9UQF2	sp|Q9UQF2|JIP1_HUMAN C-Jun-amino-terminal kinase-interacting protein 1 OS=Homo sapiens GN=MAPK8IP1 PE=1 SV=1	5e-34
KH.L18.131.v1.A.SL2-1	280	41	85	288	214	196	84	207	336	246	15.0844	2.30845	4.22258	14.3647	11.3605	10.4428	4.14537	11.4831	19.3137	12.3263	0.153035	1.82919	3.40189	0.790857	0.396959	2.7701	1.68193	0.638213	Q2KMM2	sp|Q2KMM2|TPPC1_RAT Trafficking protein particle complex subunit 1 OS=Rattus norvegicus GN=Trappc1 PE=2 SV=1	2e-25
KH.C8.816.v1.B.ND1-1	1268	186	184	124	69	822	324	148	87	39	11.2316	1.72187	1.50289	1.0169	0.602257	7.20084	2.62893	1.34989	0.822236	0.3213	0.153306	0.872826	0.676628	0.592249	0.365087	0.513476	0.609112	0.390764	P16109	sp|P16109|LYAM3_HUMAN P-selectin OS=Homo sapiens GN=SELP PE=1 SV=3	2e-05
KH.C1.938.v1.A.SL1-1	218	32	77	424	605	198	42	285	385	500	4.14128	0.635322	1.34883	7.45725	11.3252	3.71992	0.73087	5.57493	7.8036	8.83434	0.153412	2.12307	5.52868	1.51868	0.196475	7.6278	1.39977	1.13208	Q6AYJ1	sp|Q6AYJ1|RECQ1_RAT ATP-dependent DNA helicase Q1 OS=Rattus norvegicus GN=Recql PE=2 SV=1	3e-78
KH.S728.2.v1.A.SL1-1	251	37	85	271	226	190	67	220	253	265	5.31406	0.818692	1.65944	5.31199	4.7149	3.97829	1.29939	4.79614	5.71517	5.21824	0.154062	2.02693	3.20108	0.887597	0.326621	3.69106	1.19162	0.913051	Q96SZ6	sp|Q96SZ6|CK5P1_HUMAN CDK5 regulatory subunit-associated protein 1 OS=Homo sapiens GN=CDK5RAP1 PE=1 SV=2	3e-107
KH.C11.430.v1.A.SL1-1	101	15	10	38	9	134	3	2	6	5	3.93805	0.611248	0.359541	1.37176	0.345792	5.1672	0.107151	0.0802984	0.249613	0.181324	0.155216	0.588209	3.81531	0.252078	0.0207367	0.749398	3.10857	0.726421	P69525	sp|P69525|TMPS9_MOUSE Transmembrane protease serine 9 OS=Mus musculus GN=Tmprss9 PE=2 SV=1	3e-19
KH.C2.728.v1.A.SL2-1	383	57	97	165	171	308	102	202	200	197	8.616	1.34013	2.01218	3.43658	3.79066	6.85248	2.10194	4.67924	4.80057	4.12191	0.15554	1.50148	1.70788	1.10303	0.306741	2.22615	1.02593	0.85863	Q3SZ40	sp|Q3SZ40|DDX56_BOVIN Probable ATP-dependent RNA helicase DDX56 OS=Bos taurus GN=DDX56 PE=2 SV=1	4e-94
KH.C1.325.v1.A.SL1-1	114	17	53	266	262	101	26	130	243	285	2.46422	0.384052	1.05643	5.32343	5.58069	2.15917	0.514827	2.89358	5.60451	5.72988	0.155851	2.75074	5.03909	1.04833	0.238438	5.62048	1.93688	1.02237	Q505F5	sp|Q505F5|LRC47_MOUSE Leucine-rich repeat-containing protein 47 OS=Mus musculus GN=Lrrc47 PE=2 SV=1	8e-21
KH.C3.450.v1.C.ND1-1	174	26	34	60	11	136	34	44	63	20	29.3065	4.57671	5.28058	9.35622	1.82565	22.6539	5.24573	7.63104	11.3217	3.13307	0.156167	1.15379	1.77182	0.195127	0.23156	1.45471	1.48364	0.276732
KH.C14.528.v1.C.ND1-1	207	31	40	71	53	134	43	61	40	50	3.19869	0.500645	0.569969	1.01577	0.807031	2.04785	0.608673	0.97062	0.659506	0.718618	0.156516	1.13847	1.78215	0.794501	0.297226	1.59465	0.679469	1.08963	Q96RW7	sp|Q96RW7|HMCN1_HUMAN Hemicentin-1 OS=Homo sapiens GN=HMCN1 PE=1 SV=2	7e-11
KH.S403.8.v1.A.ND1-1	2533	381	462	742	422	1504	615	893	993	465	95.7155	15.0466	16.0982	25.9589	15.7134	56.2064	21.288	34.7468	40.0362	16.3428	0.157201	1.06989	1.61253	0.60532	0.378748	1.63222	1.15222	0.4082	Q5RCE6	sp|Q5RCE6|RL1D1_PONAB Ribosomal L1 domain-containing protein 1 OS=Pongo abelii GN=RSL1D1 PE=2 SV=2	1e-11
KH.C1.209.v1.A.SL2-1	678	102	160	519	438	574	133	452	619	472	19.0324	2.99247	4.14163	13.4886	12.1157	15.9355	3.42001	13.0653	18.54	12.3234	0.15723	1.38402	3.25682	0.898222	0.214616	3.82024	1.41903	0.664693	P82649	sp|P82649|RT22_BOVIN 28S ribosomal protein S22, mitochondrial OS=Bos taurus GN=MRPS22 PE=1 SV=2	8e-24
KH.C6.14.v1.A.SL1-1	802	121	280	1256	2239	576	127	825	1206	2025	18.8076	2.96559	6.05489	27.2699	51.7399	13.3589	2.7282	19.9219	30.1761	44.1682	0.15768	2.04172	4.50379	1.89732	0.204223	7.3022	1.51472	1.46368	A1L2E4	sp|A1L2E4|RML1B_DANRE RNA methyltransferase-like protein 1B OS=Danio rerio GN=rnmtl1b PE=2 SV=2	3e-08
KH.C2.16.v1.A.ND1-1	449	68	130	365	325	324	129	306	347	339	8.11767	1.28487	2.16729	6.10961	5.79003	5.79323	2.13643	5.6967	6.69377	5.70047	0.158281	1.68677	2.81901	0.947692	0.36878	2.66646	1.17503	0.851608	Q96GQ7	sp|Q96GQ7|DDX27_HUMAN Probable ATP-dependent RNA helicase DDX27 OS=Homo sapiens GN=DDX27 PE=1 SV=2	4e-121
KH.C4.775.v1.A.SL1-1	688	105	102	730	63	610	139	78	343	52	38.247	6.10048	5.22875	37.5722	3.45113	33.5374	7.07843	4.46499	20.3451	2.68867	0.159502	0.857104	7.1857	0.0918532	0.211061	0.630788	4.55658	0.132154	C4LBK4	sp|C4LBK4|PROA_TOLAT Gamma-glutamyl phosphate reductase OS=Tolumonas auensis (strain DSM 9187 / TA4) GN=proA PE=3 SV=1	0.18
KH.S498.1.v2.A.SL1-1	358	55	93	293	666	267	139	219	268	710	7.26375	1.16629	1.74	5.50402	13.3157	5.35771	2.58348	4.5755	5.80188	13.3987	0.160563	1.49191	3.16323	2.41926	0.482199	1.77106	1.26803	2.30937	P24864	sp|P24864|CCNE1_HUMAN G1/S-specific cyclin-E1 OS=Homo sapiens GN=CCNE1 PE=1 SV=2	2e-64
KH.L83.4.v1.A.ND1-1	377	58	198	1198	840	456	65	746	1142	1024	35.3639	5.68609	17.1267	104.043	77.6444	42.3033	5.58529	72.0568	114.299	89.3398	0.160788	3.01203	6.07488	0.746276	0.13203	12.9012	1.58623	0.781634	P0CZ23	sp|P0CZ23|ACOX3_ARATH Acyl-coenzyme A oxidase 3, peroxisomal OS=Arabidopsis thaliana GN=ACX3 PE=1 SV=1	0.057
KH.C5.298.v6.A.nonSL3-2	701	108	127	314	353	480	158	282	337	345	25.4898	4.10429	4.25834	10.5709	12.6484	17.2616	5.26282	10.5588	13.0748	11.6679	0.161017	1.03753	2.4824	1.19653	0.304887	2.0063	1.23828	0.892398	P91753	sp|P91753|MP62_LYTPI Mitotic apparatus protein p62 OS=Lytechinus pictus PE=2 SV=1	0.001
KH.C1.1232.v1.A.ND1-1	563	87	190	518	274	286	99	406	497	329	18.2199	2.94255	5.66997	15.5204	8.73777	9.15366	2.93486	13.5295	17.1613	9.90285	0.161502	1.92689	2.7373	0.562986	0.320621	4.60993	1.26844	0.577044	O43345	sp|O43345|ZN208_HUMAN Zinc finger protein 208 OS=Homo sapiens GN=ZNF208 PE=2 SV=1	7e-32
KH.C5.506.v1.R.ND1-1	503	78	136	395	210	460	94	445	297	260	6.69885	1.08566	1.67017	4.8704	2.7559	6.05871	1.14676	6.10252	4.22031	3.22056	0.162066	1.53839	2.91611	0.565847	0.189275	5.32152	0.69157	0.763109	A4FV93	sp|A4FV93|DLK2_BOVIN Protein delta homolog 2 OS=Bos taurus GN=DLK2 PE=2 SV=1	2.7
KH.C4.619.v1.B.SL1-1	1615	251	411	1481	1297	1123	333	1185	1469	1239	60.8744	9.88785	14.2854	51.6835	48.1741	41.8632	11.4979	45.9936	59.0799	43.4369	0.16243	1.44474	3.61793	0.932098	0.274655	4.00016	1.28453	0.735223	P28656	sp|P28656|NP1L1_MOUSE Nucleosome assembly protein 1-like 1 OS=Mus musculus GN=Nap1l1 PE=1 SV=2	8e-39
KH.L53.12.v1.C.SL1-1	199	31	55	217	184	151	27	171	213	194	6.45853	1.0515	1.64601	6.52042	5.88451	4.84672	0.802708	5.71471	7.37593	5.8561	0.162808	1.56539	3.96135	0.902474	0.165619	7.11928	1.29069	0.793947	Q14585	sp|Q14585|ZN345_HUMAN Zinc finger protein 345 OS=Homo sapiens GN=ZNF345 PE=2 SV=1	3e-61
KH.C1.1169.v1.A.nonSL2-1	279	44	72	242	205	136	49	154	238	224	13.9061	2.29204	3.30921	11.1674	10.0686	6.70397	2.23724	7.90387	12.6571	10.3843	0.164822	1.44378	3.37465	0.901603	0.333718	3.53288	1.60138	0.820428	Q9QYL7	sp|Q9QYL7|ABT1_MOUSE Activator of basal transcription 1 OS=Mus musculus GN=Abt1 PE=2 SV=1	5e-18
KH.C6.205.v1.A.SL1-1	114	18	12	153	65	107	18	17	84	63	4.35866	0.719261	0.423076	5.41595	2.44891	4.04597	0.630425	0.669289	3.42676	2.24034	0.165019	0.588209	12.8014	0.452167	0.155816	1.06165	5.12	0.653779	Q9C7I1	sp|Q9C7I1|ATL34_ARATH RING-H2 finger protein ATL34 OS=Arabidopsis thaliana GN=ATL34 PE=2 SV=1	3e-05
KH.C2.109.v1.A.SL2-1	101	16	31	71	88	104	29	65	113	81	2.93147	0.485344	0.829686	1.90791	2.51685	2.98529	0.771036	1.94265	3.49944	2.18663	0.165564	1.70948	2.29955	1.31917	0.258278	2.51953	1.80138	0.624851	Q91XW8	sp|Q91XW8|FKBP6_MOUSE Peptidyl-prolyl cis-trans isomerase FKBP6 OS=Mus musculus GN=Fkbp6 PE=2 SV=1	2e-12
KH.C10.569.v1.A.ND1-1	252	40	83	437	548	160	48	269	488	518	3.51088	0.582428	1.06631	5.6368	7.5233	2.20458	0.61259	3.85909	7.25424	6.7123	0.165892	1.8308	5.28627	1.33468	0.277872	6.29962	1.87978	0.925294	Q6NRC9	sp|Q6NRC9|LRCC1_XENLA Leucine-rich repeat and coiled-coil domain-containing protein 1 OS=Xenopus laevis GN=lrrcc1 PE=2 SV=1	7e-22
KH.L40.6.v1.A.nonSL10-1	170	27	55	107	115	136	36	107	118	86	4.18371	0.694452	1.24814	2.43799	2.78883	3.31011	0.811574	2.71152	3.0985	1.96851	0.16599	1.7973	1.95329	1.14391	0.245181	3.34107	1.14271	0.635311	C4R970	sp|C4R970|ASA1_PICPG ASTRA-associated protein 1 OS=Komagataella pastoris (strain GS115 / ATCC 20864) GN=ASA1 PE=3 SV=1	2.6
KH.C12.582.v1.C.nonSL2-1	144	23	61	234	205	121	53	155	226	226	8.84041	1.47572	3.45325	13.3003	12.4015	7.34659	2.98057	9.79848	14.8039	12.9046	0.166929	2.34005	3.85152	0.932427	0.405708	3.28745	1.51083	0.871705	Q8WXX5	sp|Q8WXX5|DNJC9_HUMAN DnaJ homolog subfamily C member 9 OS=Homo sapiens GN=DNAJC9 PE=1 SV=1	7e-07
KH.C1.239.v2.A.SL1-1	469	75	119	262	209	302	146	265	250	209	10.6565	1.78102	2.49331	5.5116	4.6795	6.78639	3.03884	6.20017	6.06091	4.41686	0.16713	1.39994	2.21055	0.849027	0.447784	2.04031	0.977538	0.728746	Q9JI13	sp|Q9JI13|SAS10_MOUSE Something about silencing protein 10 OS=Mus musculus GN=Utp3 PE=1 SV=1	5e-07
KH.C5.210.v3.A.SL1-2	174	28	42	145	124	140	37	107	140	131	3.02395	0.508569	0.673075	2.33307	2.12353	2.40627	0.589034	1.91481	2.59603	2.1175	0.16818	1.32347	3.46629	0.910187	0.244792	3.25077	1.35576	0.815667	Q8NEP9	sp|Q8NEP9|ZN555_HUMAN Zinc finger protein 555 OS=Homo sapiens GN=ZNF555 PE=2 SV=4	6e-17
KH.C8.528.v1.A.SL2-1	298	48	90	307	367	211	65	221	230	296	6.82239	1.14849	1.89999	6.5072	8.27939	4.77742	1.36316	5.2099	5.6183	6.30287	0.168341	1.65434	3.42486	1.27234	0.285334	3.82193	1.07839	1.12185	Q9NRM2	sp|Q9NRM2|ZN277_HUMAN Zinc finger protein 277 OS=Homo sapiens GN=ZNF277 PE=1 SV=2	1e-51
KH.C2.545.v1.A.SL1-1	155	25	24	152	101	108	42	9	47	85	4.42229	0.745456	0.631416	4.01508	2.83955	3.0474	1.09769	0.264408	1.43077	2.25559	0.168568	0.84702	6.35885	0.70722	0.360204	0.240878	5.41122	1.57649	Q2KIH7	sp|Q2KIH7|PH4H_BOVIN Phenylalanine-4-hydroxylase OS=Bos taurus GN=PAH PE=2 SV=1	4e-107
KH.L40.6.v1.A.nonSL8-1	155	25	52	134	102	135	35	122	124	116	3.85011	0.649004	1.19106	3.08164	2.49663	3.31639	0.796384	3.12046	3.28639	2.67994	0.168568	1.83521	2.58731	0.810162	0.240136	3.91828	1.05318	0.815466	P30803	sp|P30803|ADCY5_CANFA Adenylate cyclase type 5 OS=Canis familiaris GN=ADCY5 PE=1 SV=2	8.5
KH.L116.36.v1.A.ND3-1	316	51	64	67	27	211	51	98	62	37	6.21669	1.0486	1.16102	1.22034	0.523417	4.1053	0.919085	1.98525	1.30143	0.677018	0.168674	1.10722	1.05109	0.42891	0.223878	2.16003	0.655549	0.520211	O15381	sp|O15381|NVL_HUMAN Nuclear valosin-containing protein-like OS=Homo sapiens GN=NVL PE=1 SV=1	2e-137
KH.S389.1.v4.B.SL1-1	662	107	159	382	392	507	205	298	313	400	20.4593	3.45607	4.53125	10.9303	11.938	15.4964	5.80363	9.48343	10.3213	11.4979	0.168924	1.3111	2.4122	1.09219	0.374515	1.63405	1.08835	1.114	P20397	sp|P20397|NUCL_XENLA Nucleolin OS=Xenopus laevis GN=ncl PE=2 SV=3	1e-06
KH.L61.5.v1.A.nonSL2-1	977	158	213	605	864	591	215	499	748	879	45.4	7.67335	9.12704	26.0287	39.5628	27.1606	9.15194	23.877	37.0868	37.9906	0.169016	1.18945	2.85182	1.51997	0.336956	2.60895	1.55325	1.02437	O88513	sp|O88513|GEMI_MOUSE Geminin OS=Mus musculus GN=Gmnn PE=1 SV=1	6e-06
KH.C2.292.v1.A.SL1-1	136	22	38	146	89	135	32	117	123	79	2.12109	0.358599	0.546503	2.10818	1.3678	2.08231	0.457176	1.87898	2.04683	1.14597	0.169064	1.52399	3.85759	0.648805	0.219553	4.10998	1.08933	0.559876	D0ZRB2	sp|D0ZRB2|SLRP_SALT1 E3 ubiquitin-protein ligase SlrP OS=Salmonella typhimurium (strain 14028s / SGSC 2262) GN=slrP PE=3 SV=1	0.85
KH.C5.521.v1.A.SL2-1	173	28	45	174	171	117	44	136	223	162	3.53387	0.597763	0.84763	3.29071	3.44202	2.36364	0.823324	2.86062	4.86033	3.07784	0.169152	1.418	3.88225	1.04598	0.348329	3.47448	1.69905	0.633257	Q9XT62	sp|Q9XT62|RAD17_CHLAE Cell cycle checkpoint protein RAD17 OS=Chlorocebus aethiops GN=RAD17 PE=1 SV=1	8e-37
KH.L10.13.v1.A.SL1-1	129	21	25	362	579	124	31	30	157	654	4.87051	0.828649	0.87039	12.654	21.5415	4.63017	1.07216	1.16633	6.32472	22.9662	0.170136	1.05037	14.5383	1.70234	0.23156	1.08784	5.42273	3.63118
KH.C12.362.v1.A.SL1-1	930	152	255	837	1379	708	217	740	1100	1492	27.3786	4.67668	6.9224	22.8133	40.004	20.6135	5.85195	22.4324	34.5523	40.8529	0.170815	1.4802	3.29558	1.75354	0.283889	3.83332	1.54028	1.18235	Q5FBB7	sp|Q5FBB7|SGOL1_HUMAN Shugoshin-like 1 OS=Homo sapiens GN=SGOL1 PE=1 SV=1	0.003
KH.C4.609.v1.A.SL1-1	250	41	82	412	381	183	68	257	418	419	8.78045	1.50497	2.6557	13.397	13.186	6.3565	2.18776	9.29451	15.6642	13.6873	0.1714	1.76463	5.04464	0.984248	0.344176	4.24842	1.68532	0.873791	O46638	sp|O46638|FKBP3_RABIT Peptidyl-prolyl cis-trans isomerase FKBP3 OS=Oryctolagus cuniculus GN=FKBP3 PE=2 SV=2	6e-41
KH.S999.1.v1.A.SL3-1	164	27	48	187	184	107	25	100	175	160	5.21064	0.896555	1.4063	5.50077	5.76072	3.36218	0.727612	3.27163	5.93255	4.72817	0.172062	1.56856	3.91153	1.04726	0.216411	4.49639	1.81333	0.796988	Q5EA11	sp|Q5EA11|TTC4_BOVIN Tetratricopeptide repeat protein 4 OS=Bos taurus GN=TTC4 PE=2 SV=2	2e-18
KH.C2.525.v1.A.ND1-1	224	37	86	288	552	174	63	195	300	471	3.82684	0.660634	1.35482	4.55534	9.29274	2.9399	0.985931	3.4304	5.46853	7.4841	0.172631	2.05078	3.36233	2.03997	0.335362	3.47935	1.59414	1.36858	Q00547	sp|Q00547|HMMR_MOUSE Hyaluronan mediated motility receptor OS=Mus musculus GN=Hmmr PE=1 SV=4	7e-14
KH.C1.1168.v1.A.SL4-1	230	38	88	175	156	157	57	138	184	180	3.63342	0.627389	1.28191	2.55953	2.42842	2.45289	0.82485	2.24483	3.10143	2.64476	0.172672	2.04325	1.99665	0.948775	0.336278	2.7215	1.38159	0.852755	Q7T0Q5	sp|Q7T0Q5|NOL10_XENLA Nucleolar protein 10 OS=Xenopus laevis GN=nol10 PE=2 SV=1	9e-123
KH.C12.133.v1.A.ND1-1	260	43	145	824	568	270	64	493	710	685	5.02125	0.867906	2.58223	14.7333	10.8093	5.15695	1.13222	9.80397	14.6303	12.3042	0.172847	2.97524	5.70566	0.733665	0.219553	8.65906	1.49228	0.841011	B2VVA8	sp|B2VVA8|ARGJ_PYRTR Arginine biosynthesis bifunctional protein ArgJ, mitochondrial OS=Pyrenophora tritici-repentis (strain Pt-1C-BFP) GN=PTRG_01175 PE=3 SV=1	5
KH.C5.373.v1.A.SL2-1	429	71	80	300	196	270	123	230	351	235	26.9207	4.65644	4.62922	17.4295	12.1198	16.7565	7.07046	14.8619	23.5013	13.7159	0.172969	0.994155	3.76511	0.695363	0.421953	2.10197	1.58132	0.58362	Q07016	sp|Q07016|MAX_XENLA Protein max OS=Xenopus laevis GN=max PE=2 SV=1	2e-23
KH.C5.565.v1.A.SL1-1	151	25	53	128	90	116	36	124	135	93	4.01725	0.695117	1.30022	3.1528	2.35942	3.05211	0.877339	3.39696	3.83214	2.30123	0.173033	1.8705	2.42483	0.748358	0.287453	3.87189	1.12811	0.600508	P32780	sp|P32780|TF2H1_HUMAN General transcription factor IIH subunit 1 OS=Homo sapiens GN=GTF2H1 PE=1 SV=1	2e-81
KH.S1557.1.v1.A.ND1-1	169	28	77	713	519	140	34	99	683	746	5.47312	0.947704	2.29947	21.3783	16.5626	4.48402	1.00865	3.30142	23.6007	22.4705	0.173156	2.42636	9.29705	0.774738	0.224944	3.2731	7.14867	0.952111	Q60631	sp|Q60631|GRB2_MOUSE Growth factor receptor-bound protein 2 OS=Mus musculus GN=Grb2 PE=1 SV=1	1e-11
KH.C9.786.v1.A.SL1-1	573	95	156	397	401	469	156	376	428	401	11.0897	1.92156	2.78406	7.11362	7.64753	8.97694	2.76568	7.49324	8.83822	7.2183	0.173275	1.44885	2.55513	1.07505	0.308088	2.70936	1.17949	0.816714	Q14684	sp|Q14684|RRP1B_HUMAN Ribosomal RNA processing protein 1 homolog B OS=Homo sapiens GN=RRP1B PE=1 SV=3	7e-26
KH.C4.738.v1.A.SL1-1	199	33	64	217	231	134	54	181	262	222	7.46367	1.29354	2.21344	7.53519	8.53735	4.97044	1.85527	6.99028	10.4847	7.74423	0.173311	1.71115	3.40429	1.133	0.37326	3.76781	1.4999	0.73862	Q32LE2	sp|Q32LE2|GKAP1_BOVIN G kinase-anchoring protein 1 OS=Bos taurus GN=GKAP1 PE=2 SV=2	5e-05
KH.C4.286.v3.A.SL3-1	295	49	53	175	98	207	59	180	235	133	10.195	1.76981	1.68899	5.59934	3.33735	7.07497	1.86779	6.4055	8.66538	4.27505	0.173596	0.954338	3.31519	0.596025	0.264	3.42945	1.3528	0.493348	Q9Y6V7	sp|Q9Y6V7|DDX49_HUMAN Probable ATP-dependent RNA helicase DDX49 OS=Homo sapiens GN=DDX49 PE=1 SV=1	2e-103
KH.C11.450.v1.A.ND1-1	746	124	172	459	449	447	143	419	418	389	13.2754	2.30619	2.82244	7.56233	7.87347	7.86694	2.33108	7.67784	7.93671	6.43848	0.17372	1.22385	2.67936	1.04114	0.296313	3.29368	1.03372	0.811228	Q03701	sp|Q03701|CEBPZ_HUMAN CCAAT/enhancer-binding protein zeta OS=Homo sapiens GN=CEBPZ PE=1 SV=3	3e-49
KH.S391.12.v1.A.SL1-1	406	68	166	515	547	400	91	383	489	676	6.63111	1.16074	2.5001	7.78758	8.80358	6.46116	1.36149	6.44133	8.52168	10.2691	0.175045	2.15388	3.11491	1.13046	0.210719	4.73109	1.32297	1.20506	P27641	sp|P27641|XRCC5_MOUSE X-ray repair cross-complementing protein 5 OS=Mus musculus GN=Xrcc5 PE=2 SV=4	2e-17
KH.S621.5.v1.A.nonSL2-1	161	27	48	107	72	134	53	97	105	68	2.99936	0.525694	0.82458	1.84553	1.32174	2.46887	0.904465	1.86076	2.08712	1.17825	0.175269	1.56856	2.23815	0.716185	0.366348	2.05731	1.12165	0.564533	A5D7C2	sp|A5D7C2|SDA1_BOVIN Protein SDA1 homolog OS=Bos taurus GN=SDAD1 PE=2 SV=1	1e-118
KH.C12.385.v1.A.SL1-1	107	18	56	126	162	113	31	128	169	178	3.77559	0.663804	1.82212	4.1163	5.63285	3.94339	1.00202	4.6508	6.36274	5.84181	0.175815	2.74497	2.25907	1.36843	0.254101	4.64143	1.36809	0.918127	Q8N567	sp|Q8N567|ZCHC9_HUMAN Zinc finger CCHC domain-containing protein 9 OS=Homo sapiens GN=ZCCHC9 PE=2 SV=2	3e-24
KH.L119.28.v1.A.SL2-1	285	48	67	210	125	161	75	159	259	182	11.2872	1.98677	2.44683	7.70007	4.87823	6.30604	2.72091	6.48417	10.9445	6.70406	0.17602	1.23156	3.14696	0.63353	0.431477	2.38308	1.68788	0.61255	Q5ZHW7	sp|Q5ZHW7|F206A_CHICK Protein FAM206A OS=Gallus gallus GN=FAM206A PE=2 SV=1	8e-19
KH.C1.240.v1.A.SL2-1	184	31	83	216	197	133	66	180	218	206	3.26538	0.574968	1.35826	3.54899	3.44504	2.3343	1.07293	3.28931	4.12789	3.40023	0.17608	2.36232	2.6129	0.970709	0.459637	3.06572	1.25494	0.823721	Q9PTG8	sp|Q9PTG8|TACC3_XENLA Transforming acidic coiled-coil-containing protein 3 OS=Xenopus laevis GN=tacc3 PE=1 SV=2	2e-05
KH.C11.445.v1.A.SL1-1	362	61	91	315	310	296	142	286	399	412	12.6066	2.22016	2.92226	10.1563	10.6381	10.1946	4.52992	10.2559	14.8258	13.3448	0.176111	1.31624	3.47549	1.04744	0.444344	2.26403	1.44559	0.900107	P49103	sp|P49103|RAB2A_MAIZE Ras-related protein Rab-2-A OS=Zea mays GN=RAB2A PE=1 SV=1	1.2
KH.L7.16.v1.A.ND1-1	243	41	56	535	339	345	74	110	249	320	4.42687	0.780622	0.940735	9.02359	6.08558	6.21584	1.23491	2.06348	4.84001	5.42209	0.176337	1.20511	9.59207	0.674408	0.198671	1.67095	2.34556	1.12026	Q9JID6	sp|Q9JID6|ACSL1_CAVPO Long-chain-fatty-acid--CoA ligase 1 OS=Cavia porcellus GN=ACSL1 PE=2 SV=1	8e-111
KH.S406.8.v1.A.SL1-1	426	72	97	254	268	311	115	188	213	203	18.4168	3.25315	3.86692	10.1666	11.417	13.2971	4.55424	8.36912	9.82519	8.16257	0.17664	1.18867	2.62911	1.123	0.3425	1.83765	1.17398	0.83078	Q13601	sp|Q13601|KRR1_HUMAN KRR1 small subunit processome component homolog OS=Homo sapiens GN=KRR1 PE=1 SV=4	5e-48
KH.C2.471.v2.A.nonSL9-1	195	33	75	166	207	124	65	154	138	220	4.11116	0.727127	1.45808	3.24021	4.30043	2.58548	1.25533	3.34324	3.10431	4.31398	0.176866	2.00526	2.22225	1.32721	0.485528	2.66324	0.928534	1.38967	Q501J6	sp|Q501J6|DDX17_MOUSE Probable ATP-dependent RNA helicase DDX17 OS=Mus musculus GN=Ddx17 PE=2 SV=1	7e-131
KH.L147.8.v1.A.ND1-1	360	61	91	221	159	266	76	222	202	168	5.61852	0.994982	1.30963	3.19335	2.44528	4.10574	1.08654	3.56771	3.36378	2.43868	0.17709	1.31624	2.43836	0.76574	0.26464	3.28355	0.94284	0.724982	Q9BWH6	sp|Q9BWH6|RPAP1_HUMAN RNA polymerase II-associated protein 1 OS=Homo sapiens GN=RPAP1 PE=1 SV=3	6e-12
KH.C2.150.v2.A.SL3-1	377	64	114	290	112	338	121	242	274	160	12.7659	2.26494	3.55962	9.09166	3.73715	11.3192	3.75326	8.43806	9.89959	5.03914	0.177421	1.57162	2.55411	0.411052	0.331582	2.24819	1.17321	0.509025	Q9W7M8	sp|Q9W7M8|TYB_DANRE Thymosin beta OS=Danio rerio GN=tmsb PE=2 SV=3	0.002
KH.C8.446.v1.A.nonSL16-1	253	43	59	97	87	205	109	89	83	89	6.40732	1.13813	1.37783	2.27438	2.17114	5.13453	2.52869	2.32093	2.2428	2.09639	0.177629	1.21062	1.65069	0.954606	0.492488	0.91784	0.966335	0.93472	Q8NC51	sp|Q8NC51|PAIRB_HUMAN Plasminogen activator inhibitor 1 RNA-binding protein OS=Homo sapiens GN=SERBP1 PE=1 SV=2	0.11
KH.C12.575.v1.B.ND1-1	200	34	72	192	173	130	69	160	277	207	2.19884	0.390669	0.729936	1.95434	1.87423	1.41351	0.694906	1.81134	3.24937	2.1167	0.17767	1.86843	2.67741	0.959007	0.491619	2.6066	1.7939	0.651419	Q5TCS8	sp|Q5TCS8|KAD9_HUMAN Adenylate kinase 9 OS=Homo sapiens GN=AK9 PE=1 SV=2	3e-71
KH.C7.49.v1.B.SL1-1	1661	283	419	1470	1226	1263	321	1146	1193	1124	45.9995	8.19098	10.7001	37.6908	33.4569	34.5921	8.14332	32.6802	35.2517	28.9518	0.178067	1.30632	3.52249	0.887667	0.23541	4.01313	1.07869	0.821288	O70467	sp|O70467|ANM3_RAT Protein arginine N-methyltransferase 3 OS=Rattus norvegicus GN=Prmt3 PE=1 SV=1	3e-50
KH.C14.586.v1.A.SL1-1	234	40	70	190	181	146	40	148	206	183	6.05821	1.08232	1.67115	4.55425	4.61763	3.73828	0.94864	3.94554	5.69052	4.40662	0.178653	1.54405	2.72522	1.01392	0.253764	4.15916	1.44226	0.774379	Q9P2J8	sp|Q9P2J8|ZN624_HUMAN Zinc finger protein 624 OS=Homo sapiens GN=ZNF624 PE=2 SV=3	7e-44
KH.C11.117.v1.A.nonSL10-1	146	25	40	100	112	108	25	89	99	104	3.10264	0.555246	0.783841	1.9675	2.34536	2.26983	0.486667	1.94754	2.24476	2.0556	0.178959	1.4117	2.51007	1.19205	0.214407	4.00178	1.15262	0.915731	Q3V1V3	sp|Q3V1V3|ESF1_MOUSE ESF1 homolog OS=Mus musculus GN=Esf1 PE=1 SV=1	1e-29
KH.C8.546.v2.A.SL2-2	245	42	85	234	184	203	72	184	235	249	9.12849	1.63549	2.92039	8.07205	6.75558	7.4803	2.45741	7.05939	9.34237	8.62895	0.179163	1.78563	2.76403	0.83691	0.328518	2.87269	1.3234	0.923637	Q90YY5	sp|Q90YY5|MED26_XENLA Mediator of RNA polymerase II transcription subunit 26 OS=Xenopus laevis GN=med26 PE=2 SV=1	0.0005
KH.C4.771.v1.A.SL1-1	1554	268	444	1306	1270	1201	322	1116	1160	1238	18.8204	3.39219	4.9585	14.6439	15.1563	14.3851	3.5723	13.9174	14.9897	13.9452	0.180239	1.46174	2.95329	1.03499	0.248334	3.89594	1.07704	0.93032	Q9BQG0	sp|Q9BQG0|MBB1A_HUMAN Myb-binding protein 1A OS=Homo sapiens GN=MYBBP1A PE=1 SV=2	0.0004
KH.S891.2.v1.A.SL1-1	224	39	109	393	398	180	67	288	372	348	8.04821	1.46448	3.61132	13.0731	14.0911	6.39608	2.20516	10.6552	14.261	11.6294	0.181963	2.46595	3.62003	1.07787	0.344766	4.83194	1.33841	0.815466	Q8K183	sp|Q8K183|PDXK_MOUSE Pyridoxal kinase OS=Mus musculus GN=Pdxk PE=1 SV=1	7e-80
KH.C9.494.v6.B.SL8-1	264	46	80	263	266	293	80	89	155	247	1.57093	0.286073	0.438967	1.44892	1.55972	1.72429	0.43607	0.545331	0.984105	1.36702	0.182104	1.53446	3.30075	1.07647	0.252898	1.25056	1.8046	1.3891	Q15746	sp|Q15746|MYLK_HUMAN Myosin light chain kinase, smooth muscle OS=Homo sapiens GN=MYLK PE=1 SV=4	9e-73
KH.C2.1129.v1.A.SL1-1	218	38	70	225	176	142	44	194	278	182	10.8657	1.97948	3.21728	10.3829	8.64424	6.99973	2.00895	9.95683	14.7844	8.43723	0.182177	1.62531	3.22724	0.832543	0.287003	4.95624	1.48485	0.570685	Q80ZS3	sp|Q80ZS3|RT26_MOUSE 28S ribosomal protein S26, mitochondrial OS=Mus musculus GN=Mrps26 PE=1 SV=1	0.19
KH.C9.96.v1.A.SL1-1	510	89	163	560	579	378	130	421	637	595	16.9528	3.09191	4.99628	17.2343	18.9654	12.4266	3.95847	14.4102	22.5926	18.3956	0.182384	1.61592	3.44943	1.10044	0.318548	3.64034	1.56782	0.81423	P81999	sp|P81999|DJB11_CANFA DnaJ homolog subfamily B member 11 OS=Canis familiaris GN=DNAJB11 PE=1 SV=2	2e-63
KH.C1.1171.v1.A.SL1-1	252	44	45	1010	1008	256	52	59	1100	1631	10.185	1.85857	1.67711	37.7935	40.1452	10.2327	1.92521	2.45544	47.4362	61.3113	0.182481	0.902365	22.5349	1.06222	0.188142	1.27542	19.3188	1.2925	Q9D8Y0	sp|Q9D8Y0|EFHD2_MOUSE EF-hand domain-containing protein D2 OS=Mus musculus GN=Efhd2 PE=1 SV=1	8e-22
KH.L172.5.v1.A.ND1-1	750	131	230	439	461	678	291	504	439	407	8.00668	1.4616	2.26416	4.33901	4.84958	7.15832	2.84575	5.54036	5.00048	4.04121	0.182548	1.5491	1.91639	1.11767	0.397545	1.94689	0.902555	0.808164	Q14690	sp|Q14690|RRP5_HUMAN Protein RRP5 homolog OS=Homo sapiens GN=PDCD11 PE=1 SV=3	3e-29
KH.C4.246.v1.A.SL1-1	778	136	234	426	247	690	210	494	430	292	14.0099	2.55953	3.88562	7.10232	4.38293	12.2884	3.46408	9.16008	8.26191	4.89063	0.182694	1.5181	1.82785	0.617112	0.281899	2.6443	0.901947	0.591949	Q8CD92	sp|Q8CD92|TTC27_MOUSE Tetratricopeptide repeat protein 27 OS=Mus musculus GN=Ttc27 PE=2 SV=2	6e-67
KH.C8.912.v1.A.SL1-1	154	27	112	420	529	101	53	281	434	547	3.40522	0.623956	2.28366	8.59823	11.5264	2.2087	1.07353	6.39805	10.2393	11.2496	0.183235	3.65996	3.76511	1.34055	0.486046	5.95983	1.60038	1.09867	Q8BGV9	sp|Q8BGV9|ATG4D_MOUSE Cysteine protease ATG4D OS=Mus musculus GN=Atg4d PE=1 SV=1	4e-48
KH.C5.7.v1.A.nonSL2-1	205	36	67	163	166	112	50	157	191	194	7.79845	1.43128	2.35027	5.74086	6.22264	4.21369	1.74236	6.14994	7.75254	6.86408	0.183533	1.64208	2.44264	1.08392	0.413499	3.52966	1.26059	0.885397	P70279	sp|P70279|SURF6_MOUSE Surfeit locus protein 6 OS=Mus musculus GN=Surf6 PE=2 SV=1	0.003
KH.C10.309.v1.A.ND1-1	239	42	41	22	16	139	69	13	17	13	5.885	1.08085	0.930939	0.501541	0.388222	3.38496	1.55636	0.329616	0.446636	0.297727	0.183661	0.861305	0.538747	0.774059	0.459787	0.211786	1.35502	0.666598	P12659	sp|P12659|HCYA_ENTDO Hemocyanin A-type, units Ode to Odg (Fragment) OS=Enteroctopus dofleini PE=2 SV=2	1e-06
KH.C11.9.v2.A.SL4-1	142	25	54	153	158	118	55	128	135	176	2.87087	0.528239	1.00672	2.86386	3.1477	2.35937	1.01859	2.66472	2.91216	3.30951	0.184	1.9058	2.84475	1.09911	0.431721	2.61608	1.09286	1.13645	Q6DIK0	sp|Q6DIK0|ASUN_XENTR Protein asunder homolog OS=Xenopus tropicalis GN=asun PE=2 SV=1	7e-74
KH.C11.250.v1.A.SL1-1	187	33	23	155	66	295	32	33	52	53	8.24969	1.52151	0.935648	6.33086	2.86914	12.8709	1.29318	1.49909	2.44769	2.17469	0.184433	0.614945	6.76628	0.453199	0.100473	1.15922	1.63278	0.888469
KH.C6.85.v1.A.SL1-1	3263	578	836	1717	1181	2502	887	1618	1793	1394	54.6937	10.1254	12.9216	26.6456	19.5066	41.4761	13.6194	27.9264	32.0669	21.7325	0.18513	1.27615	2.0621	0.732076	0.328367	2.05049	1.14826	0.677723	O02649	sp|O02649|CH60_DROME 60 kDa heat shock protein, mitochondrial OS=Drosophila melanogaster GN=Hsp60 PE=1 SV=3	6e-160
KH.C10.346.v1.A.nonSL3-1	254	45	104	271	262	217	88	236	264	257	3.90764	0.723535	1.47538	3.85998	3.97186	3.30165	1.24016	3.73861	4.33352	3.67739	0.185159	2.03912	2.61627	1.02898	0.375617	3.01462	1.15913	0.848592	Q8K4L0	sp|Q8K4L0|DDX54_MOUSE ATP-dependent RNA helicase DDX54 OS=Mus musculus GN=Ddx54 PE=1 SV=1	2e-108
KH.C14.225.v1.A.SL1-1	1095	194	315	900	1003	856	269	759	816	848	15.9779	2.95851	4.23842	12.1586	14.4217	12.3529	3.59559	11.4042	12.7043	11.5087	0.185163	1.43262	2.86866	1.18614	0.291073	3.17171	1.11401	0.90589	Q5RFQ3	sp|Q5RFQ3|PWP2_PONAB Periodic tryptophan protein 2 homolog OS=Pongo abelii GN=PWP2 PE=2 SV=1	3e-175
KH.C2.471.v2.A.nonSL15-1	180	32	61	157	205	136	59	138	137	185	3.82338	0.710381	1.1948	3.08752	4.29083	2.85696	1.148	3.01836	3.10493	3.65488	0.185799	1.68191	2.58414	1.38973	0.401824	2.62924	1.02868	1.17712	Q501J6	sp|Q501J6|DDX17_MOUSE Probable ATP-dependent RNA helicase DDX17 OS=Mus musculus GN=Ddx17 PE=2 SV=1	2e-134
KH.C3.181.v1.A.SL2-1	315	56	128	461	1237	207	88	339	522	1121	5.20107	0.966354	1.94886	7.04723	20.1263	3.3802	1.331	5.76367	9.19621	17.2153	0.185799	2.01672	3.61607	2.85592	0.393763	4.33033	1.59555	1.872	E2RYF8	sp|E2RYF8|TPX2_PATPE Targeting protein for Xklp2 homolog OS=Patiria pectinifera GN=TPX2 PE=2 SV=1	2e-13
KH.L41.4.v1.A.ND1-1	281	50	84	245	159	249	76	228	237	165	5.99967	1.11572	1.65382	4.84309	3.34526	5.25788	1.48644	5.01271	5.39915	3.27666	0.185964	1.48229	2.92842	0.690729	0.282707	3.37229	1.07709	0.606883	Q97L70	sp|Q97L70|UXAC_CLOAB Uronate isomerase OS=Clostridium acetobutylicum (strain ATCC 824 / DSM 792 / JCM 1419 / LMG 5710 / VKM B-1787) GN=uxaC PE=3 SV=1	1.7
KH.S115.10.v1.A.ND1-1	972	173	248	677	486	603	298	611	698	471	37.7042	7.01352	8.87082	24.3135	18.5768	23.133	10.589	24.4052	28.8892	16.993	0.186014	1.26482	2.74084	0.764055	0.457743	2.30478	1.18373	0.588214	Q9JJ80	sp|Q9JJ80|RPF2_MOUSE Ribosome production factor 2 homolog OS=Mus musculus GN=Rpf2 PE=2 SV=2	3e-66
KH.C10.383.v1.A.SL1-1	628	112	310	1136	1709	466	211	925	1020	1662	7.8361	1.46058	3.5669	13.1236	21.0133	5.75064	2.41177	11.885	13.5799	19.2884	0.186391	2.44212	3.67928	1.60118	0.419391	4.92791	1.14261	1.42037	Q5NC05	sp|Q5NC05|TTF2_MOUSE Transcription termination factor 2 OS=Mus musculus GN=Ttf2 PE=1 SV=2	2e-54
KH.L25.14.v1.C.SL1-1	297	53	124	347	283	283	99	297	319	326	9.01891	1.68205	3.47223	9.75578	8.46829	8.49913	2.75389	9.2869	10.3358	9.20749	0.186503	2.06428	2.80966	0.868028	0.32402	3.37229	1.11295	0.890833	Q3SZB7	sp|Q3SZB7|F16P1_BOVIN Fructose-1,6-bisphosphatase 1 OS=Bos taurus GN=FBP1 PE=2 SV=3	9e-98
KH.C7.557.v1.A.SL1-1	280	50	103	406	319	235	73	313	479	405	6.92089	1.29164	2.34763	9.29106	7.76974	5.74463	1.65287	7.96645	12.6327	9.31075	0.186629	1.81756	3.95763	0.83626	0.287725	4.81976	1.58574	0.737037	Q8C6G1	sp|Q8C6G1|CU002_MOUSE Protein C21orf2 homolog OS=Mus musculus PE=2 SV=1	5e-16
KH.C6.4.v1.A.SL1-1	1285	230	375	1092	1026	1088	320	889	1031	1201	23.3065	4.35981	6.27183	18.3371	18.3372	19.5161	5.31664	16.6032	19.9521	20.2602	0.187064	1.43855	2.92373	1	0.272423	3.12288	1.2017	1.01544	O35345	sp|O35345|IMA7_MOUSE Importin subunit alpha-7 OS=Mus musculus GN=Kpna6 PE=1 SV=2	2e-131
KH.C4.207.v2.A.nonSL4-1	162	29	52	115	119	134	48	93	146	120	3.85897	0.721971	1.14222	2.53623	2.79328	3.15683	1.04739	2.28116	3.71078	2.65866	0.187089	1.58208	2.22045	1.10135	0.331787	2.17794	1.62671	0.71647	Q4R8N7	sp|Q4R8N7|STIP1_MACFA Stress-induced-phosphoprotein 1 OS=Macaca fascicularis GN=STIP1 PE=2 SV=1	9e-105
KH.L87.24.v1.A.SL1-1	2723	489	703	1754	2845	2306	773	1381	1563	2537	40.0556	7.5178	9.53586	23.888	41.2392	33.5479	10.4162	20.9183	24.5319	34.7106	0.187684	1.26844	2.50507	1.72635	0.310487	2.00825	1.17275	1.41492	Q5REG1	sp|Q5REG1|SART3_PONAB Squamous cell carcinoma antigen recognized by T-cells 3 OS=Pongo abelii GN=SART3 PE=2 SV=1	9e-53
KH.C5.656.v1.A.SL1-1	956	172	287	861	1018	625	267	786	913	872	15.7791	2.96701	4.36812	13.1572	16.5571	10.2022	4.0369	13.3587	16.0787	13.3865	0.188034	1.47223	3.01209	1.25841	0.395689	3.30914	1.20362	0.83256	Q8CGC6	sp|Q8CGC6|RBM28_MOUSE RNA-binding protein 28 OS=Mus musculus GN=Rbm28 PE=1 SV=4	1e-40
KH.S256.3.v1.A.nonSL6-1	200	36	75	194	264	120	61	158	167	245	4.59971	0.865304	1.59056	4.13083	5.98296	2.72943	1.28512	3.74174	4.09801	5.24073	0.188122	1.83815	2.59709	1.44837	0.470838	2.91159	1.09521	1.27885	Q9CSN1	sp|Q9CSN1|SNW1_MOUSE SNW domain-containing protein 1 OS=Mus musculus GN=Snw1 PE=1 SV=3	2e-127
KH.C7.351.v1.C.SL2-1	561	101	189	473	551	422	168	334	383	533	8.70753	1.6384	2.7051	6.79718	8.42744	6.47791	2.38866	5.33821	6.34289	7.69459	0.188159	1.65106	2.51273	1.23984	0.368739	2.23481	1.18821	1.2131	Q3UIW5	sp|Q3UIW5|RNF10_MOUSE RING finger protein 10 OS=Mus musculus GN=Rnf10 PE=2 SV=2	6e-26
KH.C3.29.v1.C.SL1-1	344	62	184	718	1001	337	149	543	636	1034	9.43441	1.77711	4.65332	18.2312	27.0522	9.14064	3.74331	15.3346	18.611	26.3756	0.188365	2.61848	3.9179	1.48384	0.409524	4.09654	1.21366	1.41721	Q4R7V3	sp|Q4R7V3|FR1OP_MACFA FGFR1 oncogene partner OS=Macaca fascicularis GN=FGFR1OP PE=2 SV=1	3e-10
KH.S590.8.v1.A.ND1-1	813	147	140	355	255	532	230	363	448	245	32.9469	6.22598	5.23168	13.3195	10.183	21.3219	8.53818	15.1477	19.3713	9.23457	0.18897	0.840298	2.54593	0.76452	0.400441	1.77412	1.27882	0.476714	Q3B7M7	sp|Q3B7M7|RMP_BOVIN Unconventional prefoldin RPB5 interactor OS=Bos taurus GN=URI1 PE=2 SV=1	3e-15
KH.C1.22.v1.A.ND1-1	469	85	171	856	549	400	133	118	447	374	23.223	4.39876	7.80783	39.2423	26.7873	19.5883	6.03268	6.0165	23.6161	17.2243	0.189414	1.77501	5.02602	0.682614	0.307974	0.997319	3.92523	0.729346	P61078	sp|P61078|UB2D3_RAT Ubiquitin-conjugating enzyme E2 D3 OS=Rattus norvegicus GN=Ube2d3 PE=2 SV=1	4e-30
KH.L146.2.v4.A.ND1-1	226	41	105	349	336	151	77	256	340	306	3.80647	0.721712	1.63077	5.4422	5.57655	2.51525	1.188	4.43988	6.11011	4.7936	0.189601	2.25958	3.3372	1.02469	0.47232	3.73726	1.37619	0.784535	Q13619	sp|Q13619|CUL4A_HUMAN Cullin-4A OS=Homo sapiens GN=CUL4A PE=1 SV=3	8e-160
KH.C2.904.v1.A.ND1-1	424	77	131	317	271	301	99	341	339	306	10.9773	2.08346	3.12744	7.59841	6.91368	7.707	2.34788	9.09075	9.36449	7.36844	0.189798	1.50108	2.4296	0.909886	0.304643	3.87189	1.03011	0.786849	Q641B2	sp|Q641B2|EI3GB_XENLA Eukaryotic translation initiation factor 3 subunit G-B OS=Xenopus laevis GN=eif3g-b PE=2 SV=1	2e-42
KH.C3.541.v1.A.SL1-1	363	66	103	268	226	244	96	234	373	235	11.7896	2.24028	3.08474	8.05865	7.2329	7.83741	2.85612	7.82573	12.9258	7.09882	0.190022	1.37694	2.61243	0.897533	0.364422	2.73999	1.6517	0.549198	Q5XIC0	sp|Q5XIC0|ECI2_RAT Enoyl-CoA delta isomerase 2, mitochondrial OS=Rattus norvegicus GN=Eci2 PE=1 SV=1	1e-55
KH.C12.387.v1.A.SL1-1	307	56	134	533	605	217	109	416	494	572	6.37164	1.21469	2.56452	10.2418	12.3731	4.45413	2.0723	8.89043	10.9395	11.0417	0.190641	2.11125	3.99364	1.20811	0.465253	4.29013	1.23048	1.00934	Q9NUQ3	sp|Q9NUQ3|TXLNG_HUMAN Gamma-taxilin OS=Homo sapiens GN=TXLNG PE=1 SV=2	2e-15
KH.C11.229.v1.A.SL1-1	4021	734	364	3145	4216	3942	672	203	1989	5146	224.359	42.8028	18.7284	162.467	231.805	217.529	34.3473	11.6633	118.414	267.058	0.190778	0.43755	8.67492	1.42678	0.157898	0.339571	10.1526	2.2553	P50238	sp|P50238|CRIP1_HUMAN Cysteine-rich protein 1 OS=Homo sapiens GN=CRIP1 PE=1 SV=3	2e-20
KH.C10.105.v1.A.SL1-1	956	175	296	752	620	697	260	632	707	579	19.1314	3.66011	5.46224	13.9329	12.2263	13.7947	4.76625	13.0234	15.0961	10.7769	0.191314	1.49237	2.55078	0.877507	0.345512	2.73242	1.15916	0.713886	O94826	sp|O94826|TOM70_HUMAN Mitochondrial import receptor subunit TOM70 OS=Homo sapiens GN=TOMM70A PE=1 SV=1	2e-96
KH.S1334.1.v1.B.nonSL6-1	202	37	63	66	31	133	59	98	66	36	4.61292	0.883065	1.32664	1.39542	0.697587	3.00377	1.23421	2.30445	1.60814	0.764633	0.191433	1.50232	1.05184	0.499913	0.410888	1.86714	0.697842	0.475476	Q99LH1	sp|Q99LH1|NOG2_MOUSE Nucleolar GTP-binding protein 2 OS=Mus musculus GN=Gnl2 PE=2 SV=2	6e-123
KH.C10.530.v1.A.ND1-1	202	37	70	181	216	160	49	136	198	258	3.69779	0.707879	1.18162	3.06764	3.89634	2.89669	0.821676	2.56358	3.86734	4.39275	0.191433	1.66924	2.59613	1.27014	0.28366	3.11994	1.50857	1.13586	Q9ULV3	sp|Q9ULV3|CIZ1_HUMAN Cip1-interacting zinc finger protein OS=Homo sapiens GN=CIZ1 PE=1 SV=2	5e-05
KH.L157.1.v1.A.nonSL4-1	147	27	26	59	56	135	66	49	57	52	2.41835	0.464229	0.394425	0.898648	0.907825	2.19648	0.994625	0.830071	1.00054	0.795668	0.191961	0.849635	2.27837	1.01021	0.452828	0.834557	1.20536	0.79524	A3KP59	sp|A3KP59|NO66_DANRE Bifunctional lysine-specific demethylase and histidyl-hydroxylase NO66 OS=Danio rerio GN=no66 PE=2 SV=1	5e-72
KH.C7.327.v1.C.ND1-1	146	27	69	206	257	113	34	146	145	174	1.92013	0.371114	0.836787	2.5083	3.3306	1.46976	0.409609	1.97718	2.0347	2.1284	0.193276	2.2548	2.99754	1.32783	0.278691	4.827	1.02909	1.04605	Q7TN88	sp|Q7TN88|PK1L2_MOUSE Polycystic kidney disease protein 1-like 2 OS=Mus musculus GN=Pkd1l2 PE=2 SV=1	3e-12
KH.C6.169.v1.A.ND2-1	140	26	49	136	154	107	40	61	91	138	2.67299	0.51881	0.862687	2.40405	2.89735	2.02043	0.699587	1.19927	1.85381	2.45061	0.194094	1.66282	2.78669	1.2052	0.346257	1.71425	1.54579	1.32193	Q2QYW2	sp|Q2QYW2|CLH2_ORYSJ Clathrin heavy chain 2 OS=Oryza sativa subsp. japonica GN=Os12g0104800 PE=2 SV=1	1.3
KH.C14.172.v1.A.nonSL11-1	382	71	108	162	161	274	113	116	133	152	3.95415	0.768094	1.03087	1.55253	1.64221	2.80499	1.07147	1.23642	1.46892	1.46339	0.19425	1.34211	1.50604	1.05776	0.381989	1.15394	1.18805	0.996234	P18395	sp|P18395|CSDE1_RAT Cold shock domain-containing protein E1 OS=Rattus norvegicus GN=Csde1 PE=2 SV=1	2e-16
KH.C1.376.v1.A.nonSL2-1	166	31	75	264	357	109	35	230	261	356	3.49976	0.683058	1.45808	5.15311	7.41669	2.27272	0.675945	4.99315	5.8712	6.98081	0.195173	2.13463	3.53418	1.43927	0.297416	7.38692	1.17585	1.18899	O75132	sp|O75132|ZBED4_HUMAN Zinc finger BED domain-containing protein 4 OS=Homo sapiens GN=ZBED4 PE=1 SV=2	9e-10
KH.C10.135.v2.A.SL2-1	1048	196	283	564	537	806	305	609	545	470	22.9825	4.49219	5.72283	11.4512	11.6044	17.4808	6.12702	13.7521	12.7523	9.58649	0.195461	1.27395	2.00096	1.01338	0.3505	2.24451	0.927297	0.751746	P55010	sp|P55010|IF5_HUMAN Eukaryotic translation initiation factor 5 OS=Homo sapiens GN=EIF5 PE=1 SV=2	1e-42
KH.C2.723.v1.A.SL1-1	532	100	181	382	167	443	174	431	334	200	12.5998	2.47524	3.95293	8.37625	3.89744	10.3764	3.77497	10.511	8.44023	4.40562	0.196451	1.59699	2.119	0.465297	0.363805	2.7844	0.802987	0.521979	Q96G46	sp|Q96G46|DUS3L_HUMAN tRNA-dihydrouridine(47) synthase [NAD(P)(+)]-like OS=Homo sapiens GN=DUS3L PE=1 SV=2	5e-110
KH.L130.9.v1.A.SL1-1	319	60	129	338	702	244	118	268	277	617	7.51194	1.47665	2.80117	7.36908	16.2896	5.68253	2.5454	6.4985	6.95981	13.5136	0.196574	1.89697	2.63071	2.21053	0.447935	2.55303	1.07099	1.94167	Q99K43	sp|Q99K43|PRC1_MOUSE Protein regulator of cytokinesis 1 OS=Mus musculus GN=Prc1 PE=2 SV=2	3e-28
KH.L161.3.v1.A.nonSL6-1	186	35	42	97	83	121	53	99	117	108	6.09336	1.19834	1.26877	2.94206	2.67938	3.92031	1.5905	3.33961	4.08965	3.29074	0.196662	1.05878	2.31883	0.910716	0.405708	2.09973	1.22459	0.804651	Q9Y2U8	sp|Q9Y2U8|MAN1_HUMAN Inner nuclear membrane protein Man1 OS=Homo sapiens GN=LEMD3 PE=1 SV=2	0.005
KH.C11.334.v1.A.SL4-1	239	45	65	271	606	157	61	189	240	534	4.99695	0.9833	1.25317	5.2458	12.4851	3.24637	1.16829	4.06898	5.35396	10.3842	0.19678	1.27445	4.18603	2.38002	0.359876	3.48286	1.3158	1.93954	Q9I9A7	sp|Q9I9A7|CDT1_XENLA DNA replication factor Cdt1 OS=Xenopus laevis GN=cdt1 PE=1 SV=2	1e-35
KH.C7.468.v2.A.SL1-1	430	81	155	491	411	328	129	395	522	400	6.98532	1.37521	2.32187	7.38473	6.57918	5.26965	1.91964	6.60742	9.04783	6.04371	0.196871	1.68838	3.18051	0.890917	0.364283	3.442	1.36935	0.667973	Q8BMQ2	sp|Q8BMQ2|TF3C4_MOUSE General transcription factor 3C polypeptide 4 OS=Mus musculus GN=Gtf3c4 PE=2 SV=2	3.3
KH.S615.8.v1.A.ND1-1	276	52	54	274	180	346	39	74	129	130	5.06266	0.996871	0.913381	4.65324	3.25352	6.27677	0.655311	1.39771	2.52473	2.21788	0.196907	0.916248	5.09452	0.699196	0.104403	2.1329	1.80633	0.878463	Q60675	sp|Q60675|LAMA2_MOUSE Laminin subunit alpha-2 OS=Mus musculus GN=Lama2 PE=1 SV=2	1e-05
KH.C4.293.v2.A.SL2-1	238	45	73	249	366	179	76	187	324	359	7.58838	1.49952	2.14627	7.35033	11.4991	5.64437	2.21972	6.13947	11.0223	10.6462	0.197607	1.43131	3.4247	1.56444	0.393263	2.76587	1.79532	0.965871	Q9H8G2	sp|Q9H8G2|CAAP1_HUMAN Caspase activity and apoptosis inhibitor 1 OS=Homo sapiens GN=CAAP1 PE=1 SV=2	4e-05
KH.C1.839.v1.A.SL2-1	132	25	62	273	316	107	56	169	252	297	4.25358	0.841952	1.8423	8.14477	10.0341	3.41001	1.65304	5.6077	8.66439	8.9015	0.197939	2.18814	4.42097	1.23197	0.48476	3.39236	1.54509	1.02737	O74270	sp|O74270|ORC1_CANAX Origin recognition complex subunit 1 OS=Candida albicans GN=ORC1 PE=2 SV=1	1.1
KH.C11.60.v1.A.ND1-1	232	44	6	218	265	262	42	6	71	261	18.3442	3.63606	0.437473	15.9589	20.6476	20.4882	3.0421	0.488517	5.98999	19.1946	0.198212	0.120315	36.4797	1.2938	0.148481	0.160585	12.2616	3.20444	Q71SP7	sp|Q71SP7|FAS_BOVIN Fatty acid synthase OS=Bos taurus GN=FASN PE=2 SV=1	3e-05
KH.C1.398.v1.A.SL1-1	500	95	151	417	358	297	154	336	455	364	19.1979	3.81219	5.34626	14.8237	13.545	11.278	5.41649	13.2844	18.6403	12.9991	0.198573	1.40241	2.77272	0.913742	0.480272	2.45257	1.40317	0.697364	Q15560	sp|Q15560|TCEA2_HUMAN Transcription elongation factor A protein 2 OS=Homo sapiens GN=TCEA2 PE=1 SV=1	2e-43
KH.L172.18.v1.B.SL1-1	205	39	68	133	108	206	72	135	125	110	12.351	2.45572	3.77786	7.41883	6.41186	12.2746	3.97369	8.37528	8.03554	6.16406	0.198828	1.53839	1.96376	0.864269	0.323734	2.10768	0.959435	0.767101	Q6NS46	sp|Q6NS46|RRP5_MOUSE Protein RRP5 homolog OS=Mus musculus GN=Pdcd11 PE=2 SV=2	5e-11
KH.L96.100.v1.A.SL1-1	299	57	134	413	441	233	92	306	335	386	2.68786	0.535521	1.11078	3.43733	3.90649	2.07149	0.757594	2.83253	3.21319	3.22737	0.199237	2.07421	3.09451	1.13649	0.365725	3.73884	1.13439	1.00441	Q149M9	sp|Q149M9|NWD1_HUMAN NACHT and WD repeat domain-containing protein 1 OS=Homo sapiens GN=NWD1 PE=2 SV=3	9e-36
KH.C10.524.v1.A.SL1-1	215	41	203	742	678	419	163	216	307	616	3.20113	0.637991	2.78708	10.2283	9.94732	6.16977	2.22313	3.31158	4.87707	8.53043	0.199302	4.36852	3.6699	0.972529	0.360327	1.4896	1.47273	1.74909	Q9BYT9	sp|Q9BYT9|ANO3_HUMAN Anoctamin-3 OS=Homo sapiens GN=ANO3 PE=1 SV=2	1e-35
KH.C11.400.v1.A.SL1-1	267	51	137	420	496	256	105	366	423	613	6.12506	1.22274	2.89807	8.92039	11.2123	5.80804	2.20649	8.64564	10.3537	13.0793	0.19963	2.37013	3.07805	1.25692	0.379902	3.91828	1.19756	1.26325	A7SBN6	sp|A7SBN6|ZGPAT_NEMVE Zinc finger CCCH-type with G patch domain-containing protein OS=Nematostella vectensis GN=v1g244155 PE=3 SV=1	4e-27
KH.C4.724.v1.A.nonSL2-1	1235	236	327	985	974	936	435	839	885	1009	28.7683	5.74546	7.02398	21.2431	22.3572	21.5632	9.28216	20.1245	21.9961	21.8607	0.199715	1.22253	3.02437	1.05245	0.430463	2.16809	1.093	0.993842	O35344	sp|O35344|IMA4_MOUSE Importin subunit alpha-4 OS=Mus musculus GN=Kpna3 PE=1 SV=1	2e-163
KH.L124.2.v1.A.SL1-1	266	51	89	262	403	202	75	188	279	379	12.2851	2.46169	3.79032	11.203	18.3406	9.22655	3.17301	8.94071	13.7486	16.2803	0.20038	1.53972	2.95568	1.63712	0.3439	2.81774	1.53775	1.18414	Q5R4V4	sp|Q5R4V4|SARNP_PONAB SAP domain-containing ribonucleoprotein OS=Pongo abelii GN=SARNP PE=2 SV=3	9e-07
KH.C3.166.v1.C.ND1-1	599	115	151	401	293	409	142	349	298	266	8.7545	1.75658	2.03503	5.42605	4.21973	5.91178	1.90111	5.25227	4.64705	3.61586	0.200649	1.15852	2.66633	0.777678	0.321579	2.76274	0.88477	0.778099	B2J7T9	sp|B2J7T9|SYL_NOSP7 Leucine--tRNA ligase OS=Nostoc punctiforme (strain ATCC 29133 / PCC 73102) GN=leuS PE=3 SV=1	2e-76
KH.C4.40.v1.A.SL4-1	151	29	69	227	269	114	58	186	194	208	1.9767	0.396761	0.832919	2.75122	3.47	1.47591	0.695514	2.50723	2.70971	2.53253	0.200718	2.0993	3.30311	1.26126	0.471244	3.60486	1.08076	0.934612	Q4QR29	sp|Q4QR29|CTR9_XENLA RNA polymerase-associated protein CTR9 homolog OS=Xenopus laevis GN=ctr9 PE=2 SV=1	0
KH.L108.17.v1.A.SL1-1	104	20	48	601	92	132	26	105	243	120	1.79708	0.361185	0.764828	9.61487	1.56651	2.25579	0.411548	1.86827	4.48019	1.92859	0.200985	2.11755	12.5713	0.162926	0.182441	4.53962	2.39804	0.430472	Q58A42	sp|Q58A42|DD3_DICDI Protein DD3-3 OS=Dictyostelium discoideum GN=DD3-3 PE=2 SV=1	1e-11
KH.L164.5.v2.A.SL1-1	130	25	71	289	582	133	55	185	211	574	1.49225	0.29992	0.75153	3.07137	6.58316	1.50988	0.578329	2.18669	2.58427	6.12826	0.200985	2.50577	4.08682	2.14339	0.383031	3.78105	1.18182	2.37137	Q90610	sp|Q90610|NEO1_CHICK Neogenin (Fragment) OS=Gallus gallus PE=2 SV=1	4e-29
KH.C8.45.v1.A.SL1-1	576	111	219	743	859	457	111	554	727	870	14.8362	2.98806	5.20156	17.7184	21.8025	11.6415	2.61901	14.6936	19.9798	20.8423	0.201403	1.74078	3.40636	1.2305	0.224973	5.61036	1.35977	1.04317	Q69Z61	sp|Q69Z61|PWP2A_MOUSE PWWP domain-containing protein 2A OS=Mus musculus GN=Pwwp2a PE=2 SV=2	2e-11
KH.C8.627.v1.A.nonSL3-1	440	85	101	248	176	328	105	185	219	188	21.8587	4.41323	4.62681	11.4067	8.61581	16.1152	4.77831	9.46368	11.6084	8.68671	0.201898	1.0484	2.46534	0.755332	0.296509	1.98055	1.22663	0.748313	Q9D903	sp|Q9D903|EBP2_MOUSE Probable rRNA-processing protein EBP2 OS=Mus musculus GN=Ebna1bp2 PE=2 SV=1	3e-11
KH.C4.464.v1.A.nonSL2-1	739	143	247	513	486	502	251	396	445	527	11.1905	2.26312	3.44898	7.19213	7.25192	7.51794	3.4817	6.17471	7.18987	7.42235	0.202236	1.52399	2.08529	1.00831	0.463119	1.77348	1.16441	1.03233	Q9H0A0	sp|Q9H0A0|NAT10_HUMAN N-acetyltransferase 10 OS=Homo sapiens GN=NAT10 PE=1 SV=2	0
KH.L96.36.v1.A.SL1-1	759	147	190	393	312	559	138	412	457	413	17.8454	3.61217	4.11933	8.55485	7.22855	12.9983	2.97219	9.97467	11.4646	9.03151	0.202415	1.1404	2.07676	0.844965	0.22866	3.356	1.14937	0.787777	P82924	sp|P82924|RT30_BOVIN 28S ribosomal protein S30, mitochondrial OS=Bos taurus GN=MRPS30 PE=1 SV=4	8e-12
KH.C3.148.v1.C.SL1-1	5560	1078	1398	3025	2321	4178	1288	2783	3005	2412	116.14	23.5338	26.9279	58.5015	47.7742	86.3109	24.6454	59.86	66.9742	46.8608	0.202633	1.14422	2.17252	0.816632	0.285542	2.42885	1.11885	0.699685	P30946	sp|P30946|HS90A_RABIT Heat shock protein HSP 90-alpha OS=Oryctolagus cuniculus GN=HSP90AA1 PE=1 SV=2	6e-157
KH.L22.5.v1.A.ND1-1	216	42	64	182	160	109	56	170	203	190	5.4429	1.10609	1.48712	4.24603	3.97291	2.7164	1.29264	4.41105	5.45794	4.45304	0.203218	1.34448	2.85521	0.935676	0.475866	3.41244	1.23733	0.815882	Q5RBK0	sp|Q5RBK0|GIN1_PONAB Gypsy retrotransposon integrase-like protein 1 OS=Pongo abelii GN=GIN1 PE=2 SV=1	2e-05
KH.C12.495.v1.A.nonSL2-1	180	35	61	137	125	118	45	111	128	125	3.8198	0.776252	1.19368	2.69168	2.61391	2.47651	0.874771	2.42554	2.89824	2.4672	0.203218	1.53775	2.25495	0.971105	0.353226	2.77277	1.19489	0.851275	Q6P9R1	sp|Q6P9R1|DDX51_MOUSE ATP-dependent RNA helicase DDX51 OS=Mus musculus GN=Ddx51 PE=2 SV=1	1e-40
KH.L116.30.v1.A.SL2-1	380	74	213	733	997	297	103	470	677	878	6.05582	1.2325	3.1301	10.8151	15.6566	4.68098	1.50363	7.71266	11.5116	13.014	0.203523	2.53963	3.45518	1.44766	0.321221	5.12937	1.49255	1.13051	Q14CH7	sp|Q14CH7|SYAM_MOUSE Alanine--tRNA ligase, mitochondrial OS=Mus musculus GN=Aars2 PE=2 SV=1	1e-73
KH.L46.9.v1.A.ND1-1	984	192	458	1302	1502	715	315	1022	1098	1450	13.1939	2.69058	5.66282	16.1631	19.8454	9.48145	3.86903	14.1106	15.7086	18.0831	0.203926	2.10468	2.85425	1.22782	0.408063	3.64707	1.11325	1.15116	Q24K02	sp|Q24K02|IDE_BOVIN Insulin-degrading enzyme OS=Bos taurus GN=IDE PE=2 SV=1	0
KH.C8.824.v1.A.ND1-1	784	153	270	802	907	609	221	662	781	957	20.9069	4.26413	6.63935	19.8008	23.8337	16.0613	5.39857	18.1781	22.2219	23.7362	0.203958	1.55702	2.98234	1.20368	0.336123	3.3672	1.22245	1.06815	Q8K582	sp|Q8K582|DUS1L_RAT tRNA-dihydrouridine(16/17) synthase [NAD(P)(+)]-like OS=Rattus norvegicus GN=Dus1l PE=2 SV=1	7e-85
KH.C10.104.v2.A.SL1-2	388	76	142	429	619	293	137	303	383	523	6.33255	1.29636	2.1371	6.48245	9.95519	4.72939	2.04824	5.09221	6.66963	7.93916	0.204714	1.64853	3.0333	1.53571	0.433088	2.48614	1.30977	1.19034	O75400	sp|O75400|PR40A_HUMAN Pre-mRNA-processing factor 40 homolog A OS=Homo sapiens GN=PRPF40A PE=1 SV=2	5e-38
KH.L161.3.v1.A.nonSL11-1	148	29	51	98	85	109	49	94	114	97	4.79646	0.982253	1.52412	2.94049	2.7145	3.49362	1.45468	3.13692	3.94203	2.92386	0.204787	1.55165	1.92931	0.923144	0.416382	2.15643	1.25666	0.741714	Q9WU40	sp|Q9WU40|MAN1_MOUSE Inner nuclear membrane protein Man1 OS=Mus musculus GN=Lemd3 PE=1 SV=2	0.0007
KH.C6.59.v1.A.SL1-1	418	82	162	496	688	295	88	329	407	546	4.74171	0.972161	1.69458	5.20925	7.69057	3.30956	0.914438	3.84301	4.92617	5.76072	0.205024	1.74311	3.07407	1.47633	0.276302	4.20259	1.28185	1.16941	Q1B7H6	sp|Q1B7H6|TRPC_MYCSS Indole-3-glycerol phosphate synthase OS=Mycobacterium sp. (strain MCS) GN=trpC PE=3 SV=1	0.53
KH.L116.26.v2.A.SL1-1	214	42	44	246	207	246	75	82	167	185	6.75189	1.38493	1.28013	7.18592	6.43568	7.67604	2.16764	2.66405	5.62192	5.42887	0.205117	0.924328	5.61344	0.895596	0.28239	1.22901	2.11029	0.965661	A8DZE7	sp|A8DZE7|D42E1_DANRE Short-chain dehydrogenase/reductase family 42E member 1 OS=Danio rerio GN=sdr42e1 PE=2 SV=1	7e-43
KH.C2.470.v1.A.ND1-1	183	36	80	218	232	125	50	207	186	175	1.45792	0.299745	0.587708	1.60796	1.82131	0.98488	0.364894	1.69813	1.58107	1.29672	0.205597	1.9607	2.73598	1.13268	0.370495	4.65376	0.931069	0.820153	Q8SX83	sp|Q8SX83|SPEN_DROME Protein split ends OS=Drosophila melanogaster GN=spen PE=1 SV=2	0.025
KH.C2.780.v1.A.SL2-1	127	25	58	177	213	107	53	154	180	301	2.71032	0.5576	1.14139	3.49723	4.47928	2.25835	1.03611	3.38418	4.09869	5.9746	0.205732	2.04697	3.06402	1.28081	0.458791	3.26624	1.21113	1.45768	P26686	sp|P26686|SRR55_DROME Serine-arginine protein 55 OS=Drosophila melanogaster GN=B52 PE=1 SV=4	4e-17
KH.C3.437.v2.A.SL1-1	616	122	192	521	497	421	204	430	496	489	12.8436	2.65848	3.69145	10.0573	10.2112	8.68119	3.89628	9.23192	11.0343	9.4829	0.206988	1.38856	2.72448	1.0153	0.448819	2.36942	1.19523	0.859403	P37879	sp|P37879|SYK_CRIGR Lysine--tRNA ligase OS=Cricetulus griseus GN=KARS PE=1 SV=1	2e-171
KH.C1.74.v2.A.SL1-2	318	63	69	236	179	250	122	201	262	182	9.10724	1.88567	1.82221	6.25759	5.05155	7.08093	3.20061	5.92752	8.00603	4.84794	0.207052	0.966343	3.43407	0.807268	0.452004	1.852	1.35066	0.605536	Q7VJU4	sp|Q7VJU4|HIS1_HELHP ATP phosphoribosyltransferase OS=Helicobacter hepaticus (strain ATCC 51449 / 3B1) GN=hisG PE=3 SV=1	0.11
KH.C9.504.v1.A.SL1-1	464	92	141	417	404	324	102	303	450	435	11.8437	2.45427	3.31876	9.8546	10.1616	8.17906	2.38496	7.96393	12.2557	10.3272	0.207222	1.35224	2.96936	1.03115	0.291594	3.33923	1.5389	0.842648	Q9H5U6	sp|Q9H5U6|ZCHC4_HUMAN Zinc finger CCHC domain-containing protein 4 OS=Homo sapiens GN=ZCCHC4 PE=1 SV=3	5e-43
KH.L3.13.v3.A.ND1-1	186	37	60	200	552	216	94	112	173	545	2.42647	0.504463	0.721775	2.41561	7.09598	2.7868	1.12332	1.50451	2.40804	6.61278	0.2079	1.43078	3.34676	2.93755	0.403085	1.33935	1.60054	2.74612	Q14678	sp|Q14678|KANK1_HUMAN KN motif and ankyrin repeat domain-containing protein 1 OS=Homo sapiens GN=KANK1 PE=1 SV=3	2e-26
KH.C9.115.v1.A.SL1-1	125	25	52	183	268	125	47	131	140	323	2.47742	0.517841	0.950347	3.35797	5.23404	2.45014	0.853299	2.67349	2.96056	5.95413	0.209024	1.83521	3.53341	1.55869	0.348266	3.13312	1.10738	2.01115	Q9UK97	sp|Q9UK97|FBX9_HUMAN F-box only protein 9 OS=Homo sapiens GN=FBXO9 PE=1 SV=1	7e-31
KH.C12.454.v1.A.ND2-1	205	41	74	234	215	131	50	181	261	218	11.0177	2.30297	3.66741	11.6437	11.3865	6.96307	2.46163	10.0169	14.967	10.8974	0.209024	1.59247	3.1749	0.977911	0.353526	4.06923	1.49417	0.728091	Q68ER9	sp|Q68ER9|EAF6_XENTR Chromatin modification-related protein MEAF6 OS=Xenopus tropicalis GN=meaf6 PE=2 SV=1	4e-34
KH.C4.493.v1.A.SL1-1	135	27	102	497	432	149	45	286	380	493	2.50572	0.523755	1.74577	8.54063	7.90122	2.73511	0.765111	5.46615	7.52555	8.51082	0.209024	3.33318	4.89218	0.925133	0.279736	7.14426	1.37676	1.13092	Q9SS90	sp|Q9SS90|RGLG1_ARATH E3 ubiquitin-protein ligase RGLG1 OS=Arabidopsis thaliana GN=RGLG1 PE=1 SV=1	3e-22
KH.C7.334.v1.A.SL1-1	1007	202	250	254	162	928	383	326	283	208	8.93542	1.87328	2.04557	2.08667	1.41649	8.14374	3.11313	2.97865	2.67934	1.71662	0.209647	1.09197	1.02009	0.678825	0.382273	0.956803	0.899515	0.640688	P55878	sp|P55878|GLI1_CHICK Zinc finger protein GLI1 (Fragment) OS=Gallus gallus GN=GLI1 PE=2 SV=1	8e-65
KH.C1.1272.v1.A.SL2-1	244	49	111	334	277	164	66	261	294	259	4.30824	0.904215	1.80726	5.45998	4.81949	2.86381	1.0675	4.74534	5.53877	4.25339	0.209881	1.99871	3.02113	0.882694	0.372754	4.44529	1.1672	0.767931	Q9CUX1	sp|Q9CUX1|P52K_MOUSE 52 kDa repressor of the inhibitor of the protein kinase OS=Mus musculus GN=Prkrir PE=2 SV=2	5e-05
KH.C12.333.v1.A.SL1-1	174	35	52	134	102	129	47	97	124	118	5.67562	1.19316	1.56407	4.04673	3.27851	4.16145	1.40435	3.25801	4.31561	3.57991	0.210225	1.31086	2.58731	0.810162	0.337467	2.31994	1.32461	0.829526	Q9P0M2	sp|Q9P0M2|AKA7G_HUMAN A-kinase anchor protein 7 isoform gamma OS=Homo sapiens GN=AKAP7 PE=1 SV=2	2e-09
KH.L96.32.v1.A.SL1-1	795	160	242	649	1422	634	255	363	596	1246	9.97208	2.09751	2.79913	7.537	17.5764	7.86499	2.93003	4.68859	7.97666	14.5366	0.210339	1.3345	2.69262	2.33202	0.372541	1.60018	1.70129	1.82239	Q6ZPY2	sp|Q6ZPY2|SMG5_MOUSE Protein SMG5 OS=Mus musculus GN=Smg5 PE=2 SV=2	5e-18
KH.C1.644.v1.A.ND1-1	273	55	82	263	254	171	71	206	202	190	8.13205	1.71225	2.25237	7.25317	7.4556	5.0376	1.93735	6.3186	6.42014	5.26401	0.210555	1.31545	3.22024	1.02791	0.384578	3.26146	1.01607	0.819921	Q05B18	sp|Q05B18|SHQ1_XENTR Protein SHQ1 homolog OS=Xenopus tropicalis GN=shq1 PE=2 SV=1	2e-40
KH.L141.60.v1.A.ND1-1	134	27	78	606	615	141	43	193	322	607	2.23615	0.470898	1.20027	9.36277	10.1131	2.32705	0.657322	3.31643	5.73335	9.42131	0.210584	2.5489	7.80054	1.08014	0.28247	5.04536	1.72877	1.64325	Q86VP1	sp|Q86VP1|TAXB1_HUMAN Tax1-binding protein 1 OS=Homo sapiens GN=TAX1BP1 PE=1 SV=2	8e-25
KH.L143.8.v1.A.nonSL2-1	223	45	49	169	101	136	54	145	167	107	9.62237	2.02934	1.94967	6.75148	4.29448	5.80372	2.13444	6.44261	7.68865	4.29424	0.210899	0.960741	3.46288	0.63608	0.367771	3.01841	1.19341	0.558518	Q0V898	sp|Q0V898|NELFE_BOVIN Negative elongation factor E OS=Bos taurus GN=NELFE PE=2 SV=1	1e-11
KH.C1.994.v2.A.SL1-2	183	37	43	94	173	125	51	76	109	171	9.42182	1.99091	2.04146	4.48071	8.77691	6.36479	2.40529	4.02916	5.98779	8.18853	0.211308	1.02539	2.19485	1.95882	0.377905	1.67512	1.48611	1.36754	Q62376	sp|Q62376|RU17_MOUSE U1 small nuclear ribonucleoprotein 70 kDa OS=Mus musculus GN=Snrnp70 PE=1 SV=2	2e-15
KH.C4.757.v1.A.ND1-1	183	37	69	252	340	139	41	171	196	314	3.52967	0.745849	1.22722	4.50007	6.46211	2.65148	0.724403	3.39622	4.03363	5.63299	0.211308	1.64539	3.66689	1.436	0.273207	4.68831	1.18768	1.39651	Q2HJF5	sp|Q2HJF5|DPH6_BOVIN Diphthine--ammonia ligase OS=Bos taurus GN=DPH6 PE=2 SV=1	4e-61
KH.C5.158.v1.A.ND2-1	548	111	162	544	470	366	163	394	481	508	8.77015	1.85659	2.39073	8.06047	7.41201	5.79293	2.38961	6.49291	8.21349	7.56164	0.211694	1.2877	3.37156	0.919551	0.412505	2.71714	1.26499	0.920637	P78316	sp|P78316|NOP14_HUMAN Nucleolar protein 14 OS=Homo sapiens GN=NOP14 PE=1 SV=3	2e-18
KH.L7.3.v1.A.SL2-1	153	31	57	110	98	134	49	103	109	123	3.60478	0.763335	1.23837	2.39947	2.27523	3.12235	1.05754	2.49886	2.74012	2.69537	0.211756	1.62232	1.9376	0.948222	0.338699	2.3629	1.09655	0.983667	Q13769	sp|Q13769|THOC5_HUMAN THO complex subunit 5 homolog OS=Homo sapiens GN=THOC5 PE=1 SV=2	6e-30
KH.C1.982.v1.A.SL1-1	360	73	86	295	231	240	63	257	309	260	12.073	2.55859	2.65949	9.15942	7.6337	7.95999	1.93537	8.87485	11.0567	8.1098	0.211927	1.03944	3.44405	0.833425	0.243138	4.5856	1.24585	0.733474	Q8K1E6	sp|Q8K1E6|ALKB3_MOUSE Alpha-ketoglutarate-dependent dioxygenase alkB homolog 3 OS=Mus musculus GN=Alkbh3 PE=1 SV=1	1e-11
KH.C3.860.v1.C.nonSL8-1	157	32	52	147	202	114	58	145	143	207	2.54407	0.541933	0.777	2.20537	3.22547	1.82694	0.860935	2.41944	2.47242	3.11979	0.213018	1.43376	2.83831	1.46255	0.471244	2.81024	1.0219	1.26184	Q8JZQ9	sp|Q8JZQ9|EIF3B_MOUSE Eukaryotic translation initiation factor 3 subunit B OS=Mus musculus GN=Eif3b PE=1 SV=1	3e-156
KH.C6.86.v1.A.SL1-1	1746	357	1393	5811	1226	1826	736	1445	6135	1759	67.8441	14.4978	49.9123	209.052	46.9429	70.1712	26.1974	57.8166	254.354	63.5711	0.213693	3.44275	4.18838	0.224552	0.373336	2.20696	4.39933	0.249931	P61210	sp|P61210|ARF1_LOCMI ADP-ribosylation factor 1 OS=Locusta migratoria GN=ARF1 PE=2 SV=2	4e-65
KH.C2.654.v1.A.SL2-1	753	154	252	443	366	615	272	426	413	394	11.2521	2.40505	3.47237	6.12881	5.38927	9.08872	3.72322	6.55486	6.58481	5.47595	0.213743	1.44378	1.76502	0.879335	0.409653	1.76053	1.00457	0.831602	Q8VHK9	sp|Q8VHK9|DHX36_MOUSE Probable ATP-dependent RNA helicase DHX36 OS=Mus musculus GN=Dhx36 PE=1 SV=2	1e-90
KH.C8.438.v2.A.nonSL4-1	405	83	156	422	496	279	133	380	421	496	12.6199	2.703	4.48245	12.1745	15.2298	8.59798	3.79635	12.1928	13.9972	14.3751	0.214185	1.65832	2.71603	1.25097	0.44154	3.2117	1.14799	1.027	Q5REM3	sp|Q5REM3|SSF1_PONAB Suppressor of SWI4 1 homolog OS=Pongo abelii GN=PPAN PE=2 SV=1	3e-38
KH.C4.144.v1.A.SL1-1	219	45	97	245	309	208	81	173	232	323	2.9166	0.626341	1.19122	3.02088	4.05511	2.73959	0.988167	2.37244	3.29668	4.00093	0.214751	1.90187	2.53595	1.34236	0.360699	2.40085	1.38957	1.21362	Q924S5	sp|Q924S5|LONM_RAT Lon protease homolog, mitochondrial OS=Rattus norvegicus GN=Lonp1 PE=2 SV=1	0
KH.C10.157.v1.A.nonSL5-1	340	70	83	179	124	236	111	196	165	160	6.25433	1.34576	1.40789	3.04853	2.24769	4.29343	1.87042	3.71257	3.23849	2.73746	0.215172	1.04617	2.16532	0.737302	0.435646	1.98489	0.872303	0.84529	Q3SYU1	sp|Q3SYU1|NOC2L_BOVIN Nucleolar complex protein 2 homolog OS=Bos taurus GN=NOC2L PE=2 SV=1	3e-57
KH.C11.130.v1.A.SL1-1	680	140	274	779	676	489	178	720	792	693	16.0966	3.46353	5.98086	17.0725	15.7682	11.4478	3.85974	17.5499	20.0035	15.2575	0.215172	1.72681	2.85452	0.923604	0.337158	4.54691	1.13981	0.762742	Q9NYH9	sp|Q9NYH9|UTP6_HUMAN U3 small nucleolar RNA-associated protein 6 homolog OS=Homo sapiens GN=UTP6 PE=1 SV=2	8e-24
KH.C14.608.v1.A.ND1-1	364	75	391	3707	781	572	149	398	1476	886	7.34601	1.58189	7.27638	69.264	15.5315	11.4166	2.75454	8.27085	31.7828	16.6307	0.215341	4.59979	9.51902	0.224236	0.241275	3.00262	3.84276	0.523259	O16025	sp|O16025|AOSL_PLEHO Allene oxide synthase-lipoxygenase protein OS=Plexaura homomalla PE=1 SV=1	1e-31
KH.C2.1110.v1.A.ND1-1	859	177	258	682	554	594	233	669	568	542	12.1432	2.61504	3.36315	8.92602	7.7172	8.30453	3.01722	9.73826	8.56728	7.12629	0.215351	1.28608	2.65406	0.864574	0.363322	3.22756	0.879755	0.831803	P49588	sp|P49588|SYAC_HUMAN Alanine--tRNA ligase, cytoplasmic OS=Homo sapiens GN=AARS PE=1 SV=2	0
KH.L147.34.v1.R.ND1-1	262	54	96	183	150	209	100	165	207	157	6.40262	1.37917	2.1633	4.14041	3.6121	5.05119	2.23857	4.152	5.39738	3.56847	0.215406	1.56856	1.91393	0.872403	0.443176	1.85476	1.29995	0.661148	Q7T2A5	sp|Q7T2A5|EIF3L_DANRE Eukaryotic translation initiation factor 3 subunit L OS=Danio rerio GN=eif3l PE=2 SV=1	1e-125
KH.C3.683.v1.A.SL1-1	160	33	40	122	89	100	36	88	144	90	7.004	1.50975	1.61464	4.94448	3.83909	4.32929	1.44358	3.96666	6.72581	3.66433	0.215556	1.06947	3.06229	0.776438	0.333446	2.74779	1.69558	0.544816	Q04841	sp|Q04841|3MG_MOUSE DNA-3-methyladenine glycosylase OS=Mus musculus GN=Mpg PE=2 SV=3	4e-27
KH.C9.755.v1.A.ND1-1	237	49	28	16	6	293	77	24	32	20	1.42487	0.307884	0.155229	0.0890596	0.0355458	1.74214	0.424062	0.148578	0.205273	0.111836	0.21608	0.504179	0.573731	0.399124	0.243414	0.350368	1.38159	0.544816	A2ARV4	sp|A2ARV4|LRP2_MOUSE Low-density lipoprotein receptor-related protein 2 OS=Mus musculus GN=Lrp2 PE=1 SV=1	2e-121
KH.L65.13.v1.B.ND1-1	435	90	175	455	373	317	155	283	307	319	7.38426	1.59671	2.73933	7.15096	6.23934	5.32191	2.41025	4.94676	5.56048	5.03656	0.216232	1.71561	2.61048	0.872518	0.452893	2.05238	1.12406	0.905778	A4QNS7	sp|A4QNS7|MIOB_XENLA WD repeat-containing protein mio-B OS=Xenopus laevis PE=2 SV=1	3e-29
KH.C4.505.v1.A.SL2-1	193	40	78	242	208	166	56	188	283	232	4.50968	0.97682	1.68063	5.23527	4.78921	3.83607	1.19864	4.52338	7.05556	5.042	0.216605	1.72051	3.11507	0.914797	0.312466	3.77375	1.5598	0.714613	Q8IZ69	sp|Q8IZ69|TRM2A_HUMAN tRNA (uracil-5-)-methyltransferase homolog A OS=Homo sapiens GN=TRMT2A PE=1 SV=2	3e-36
KH.S215.6.v1.A.SL1-1	188	39	74	209	187	147	69	131	174	196	8.86341	1.92165	3.21709	9.12272	8.68753	6.8541	2.97992	6.35962	8.75283	8.59459	0.216807	1.67413	2.8357	0.952296	0.434765	2.13415	1.37631	0.981921	Q08CZ0	sp|Q08CZ0|UBE3B_XENTR Ubiquitin-protein ligase E3B OS=Xenopus tropicalis GN=ube3b PE=2 SV=1	0.94
KH.C11.712.v1.A.ND1-1	212	44	70	179	119	192	85	155	197	141	6.14137	1.33214	1.86989	4.80085	3.39694	5.50074	2.2556	4.62358	6.08909	3.79905	0.216912	1.40368	2.56745	0.707572	0.410053	2.04982	1.31696	0.623911	Q8K4F6	sp|Q8K4F6|NSUN5_MOUSE Putative methyltransferase NSUN5 OS=Mus musculus GN=Nsun5 PE=2 SV=2	3e-44
KH.C6.81.v1.R.ND2-1	448	93	135	298	313	340	144	248	389	364	13.8645	3.00798	3.85255	8.5384	9.54512	10.4063	4.08226	7.90303	12.8449	10.4774	0.216956	1.28078	2.2163	1.1179	0.392289	1.93594	1.62531	0.815683	Q02858	sp|Q02858|TIE2_MOUSE Angiopoietin-1 receptor OS=Mus musculus GN=Tek PE=1 SV=2	0.0003
KH.C4.342.v1.A.ND1-1	158	33	58	137	164	100	43	121	148	173	2.93985	0.641723	0.99514	2.36006	3.00693	1.84017	0.732907	2.3183	2.93823	2.99391	0.218285	1.55073	2.37159	1.27409	0.398282	3.16316	1.26741	1.01895	Q03111	sp|Q03111|ENL_HUMAN Protein ENL OS=Homo sapiens GN=MLLT1 PE=1 SV=2	8e-27
KH.C5.548.v1.A.nonSL1-1	158	33	1	47	21	362	44	3	11	50	5.26362	1.14897	0.0307196	1.44964	0.68938	11.9269	1.34274	0.102912	0.391	1.54926	0.218285	0.0267368	47.1894	0.475552	0.112581	0.076643	3.79936	3.9623	P00565	sp|P00565|KCRM_CHICK Creatine kinase M-type OS=Gallus gallus GN=CKM PE=2 SV=1	2e-122
KH.S1007.3.v1.A.ND1-1	158	33	63	173	110	128	60	149	195	132	5.3864	1.17577	1.98048	5.46038	3.69527	4.31561	1.87372	5.23051	7.09304	4.18544	0.218285	1.68442	2.7571	0.676742	0.434174	2.79151	1.35609	0.590077	Q5M939	sp|Q5M939|HAT1_RAT Histone acetyltransferase type B catalytic subunit OS=Rattus norvegicus GN=Hat1 PE=2 SV=1	5e-49
KH.C1.169.v1.A.SL1-1	1058	221	351	978	1331	738	212	774	924	1113	19.174	4.18586	5.86573	16.4097	23.7693	13.2274	3.51945	14.4439	17.8671	18.7606	0.21831	1.40132	2.79755	1.44849	0.266074	4.10401	1.237	1.05001	Q0VFA3	sp|Q0VFA3|GLD2_XENTR Poly(A) RNA polymerase GLD2 OS=Xenopus tropicalis GN=papd4 PE=2 SV=1	3e-28
KH.C4.88.v1.A.SL1-1	603	126	240	718	829	463	204	644	728	911	14.5243	3.17186	5.33062	16.0117	19.6763	11.0293	4.50112	15.9728	18.7096	20.409	0.218383	1.6806	3.00372	1.22887	0.408105	3.54862	1.17135	1.09083	O13066	sp|O13066|RAGP1_XENLA Ran GTPase-activating protein 1 OS=Xenopus laevis GN=rangap1 PE=2 SV=1	1e-55
KH.C6.190.v1.A.SL2-1	325	68	127	384	451	228	108	336	383	450	6.84875	1.49762	2.46786	7.49194	9.36518	4.75175	2.0848	7.29095	8.61158	8.81995	0.218671	1.64785	3.03581	1.25003	0.438744	3.49719	1.18113	1.0242	Q12874	sp|Q12874|SF3A3_HUMAN Splicing factor 3A subunit 3 OS=Homo sapiens GN=SF3A3 PE=1 SV=1	1e-63
KH.L7.2.v1.A.nonSL9-1	172	36	77	240	177	180	90	132	147	135	3.02869	0.662514	1.25028	3.91267	3.07123	3.13465	1.45172	2.39341	2.76185	2.21099	0.218746	1.88717	3.12944	0.784944	0.463119	1.64868	1.15394	0.800546	Q9JID6	sp|Q9JID6|ACSL1_CAVPO Long-chain-fatty-acid--CoA ligase 1 OS=Cavia porcellus GN=ACSL1 PE=2 SV=1	2e-108
KH.C5.104.v1.A.SL8-1	210	44	67	113	184	177	81	119	139	202	5.21057	1.141	1.53295	2.59585	4.49879	4.34339	1.84104	3.04039	3.67991	4.66168	0.218978	1.34352	1.69336	1.73307	0.423872	1.65145	1.21034	1.26679	P26686	sp|P26686|SRR55_DROME Serine-arginine protein 55 OS=Drosophila melanogaster GN=B52 PE=1 SV=4	2e-22
KH.C9.882.v1.C.SL5-1	124	26	40	60	46	130	45	63	68	51	2.98675	0.654511	0.888436	1.33802	1.09181	3.09679	0.992895	1.56255	1.7476	1.14255	0.219138	1.3574	1.50604	0.815987	0.320621	1.57374	1.11843	0.653779	Q9PDP5	sp|Q9PDP5|AROB_XYLFA 3-dehydroquinate synthase OS=Xylella fastidiosa (strain 9a5c) GN=aroB PE=3 SV=1	0.26
KH.C1.1275.v1.A.ND1-1	276	58	106	222	118	239	107	203	222	198	8.28679	1.82	2.93475	6.17114	3.49117	7.09685	2.94289	6.2761	7.11191	5.52928	0.219627	1.6125	2.10278	0.565726	0.414676	2.13263	1.13317	0.777467	Q9DE26	sp|Q9DE26|RUVB1_XENLA RuvB-like 1 OS=Xenopus laevis GN=ruvbl1 PE=2 SV=1	0
KH.C2.231.v2.A.ND2-1	532	112	264	836	948	385	203	640	786	895	6.98851	1.53765	3.19791	10.1675	12.2714	5.00178	2.44277	8.65705	11.0167	10.9351	0.220025	2.07974	3.17943	1.20692	0.48838	3.54395	1.27257	0.99259	P35251	sp|P35251|RFC1_HUMAN Replication factor C subunit 1 OS=Homo sapiens GN=RFC1 PE=1 SV=4	3e-81
KH.C14.524.v1.B.SL1-1	546	115	184	408	333	412	167	481	469	380	10.975	2.41589	3.41051	7.5929	6.59582	8.1903	3.07498	9.95576	10.0587	7.10431	0.220126	1.4117	2.22633	0.868682	0.375441	3.23767	1.01034	0.706286	Q01780	sp|Q01780|EXOSX_HUMAN Exosome component 10 OS=Homo sapiens GN=EXOSC10 PE=1 SV=2	3e-68
KH.S455.7.v1.A.SL1-1	199	42	53	32	6	109	26	28	16	9	10.6448	2.348	2.61425	1.58478	0.316261	5.76633	1.274	1.54226	0.913186	0.447766	0.220578	1.11339	0.606206	0.199562	0.220938	1.21057	0.592109	0.490334	P97490	sp|P97490|ADCY8_MOUSE Adenylate cyclase type 8 OS=Mus musculus GN=Adcy8 PE=2 SV=2	7.1
KH.C1.1230.v1.A.nonSL2-1	199	42	68	116	105	136	63	111	108	93	3.44653	0.760228	1.08599	1.86004	1.79197	2.32947	0.999499	1.97956	1.99576	1.49809	0.220578	1.42851	1.71276	0.963403	0.429066	1.98055	1.00819	0.750635	Q5REX3	sp|Q5REX3|ZFR_PONAB Zinc finger RNA-binding protein OS=Pongo abelii GN=ZFR PE=2 SV=1	0.0003
KH.C10.592.v2.A.ND2-1	232	49	96	341	450	187	79	231	318	436	6.23073	1.37535	2.37745	8.47892	11.909	4.96688	1.94353	6.38822	9.11244	10.8909	0.220737	1.72861	3.5664	1.40454	0.391299	3.28692	1.42644	1.19517	Q6NS23	sp|Q6NS23|TRM11_XENLA tRNA (guanine(10)-N2)-methyltransferase homolog OS=Xenopus laevis GN=trmt11 PE=2 SV=1	7e-53
KH.C12.651.v1.A.ND1-1	245	52	98	300	314	188	72	252	289	285	4.39439	0.974771	1.62087	4.98184	5.54976	3.33489	1.18298	4.65426	5.53079	4.75449	0.221821	1.66282	3.07356	1.114	0.35473	3.93434	1.18833	0.85964	Q96FV9	sp|Q96FV9|THOC1_HUMAN THO complex subunit 1 OS=Homo sapiens GN=THOC1 PE=1 SV=1	2e-86
KH.C2.606.v1.A.SL2-1	226	48	149	492	414	174	79	389	483	516	8.25759	1.83296	5.02018	16.6435	14.9059	6.28759	2.64414	14.6356	18.8299	17.5356	0.221972	2.73885	3.31532	0.895596	0.420533	5.53511	1.28658	0.931263	Q5R493	sp|Q5R493|IF2A_PONAB Eukaryotic translation initiation factor 2 subunit 1 OS=Pongo abelii GN=EIF2S1 PE=2 SV=1	6e-80
KH.C3.253.v2.A.ND3-1	240	51	130	431	578	172	74	298	353	555	2.89117	0.642095	1.44409	4.80701	6.86124	2.04919	0.816597	3.69655	4.53726	6.21845	0.222088	2.24903	3.32874	1.42734	0.398498	4.52677	1.22743	1.37053	A2BGR3	sp|A2BGR3|ERC6L_DANRE DNA excision repair protein ERCC-6-like OS=Danio rerio GN=ercc6l PE=1 SV=1	7e-109
KH.C1.1205.v1.A.SL1-1	291	62	94	373	318	203	81	277	396	306	7.60344	1.69307	2.26482	9.02321	8.18759	5.2457	1.93872	7.4527	11.04	7.43643	0.222672	1.3377	3.98407	0.907392	0.369583	3.84413	1.48134	0.67359	Q9UMR2	sp|Q9UMR2|DD19B_HUMAN ATP-dependent RNA helicase DDX19B OS=Homo sapiens GN=DDX19B PE=1 SV=1	8e-108
KH.C9.14.v4.A.ND3-2	291	62	116	266	205	266	97	216	212	180	9.92052	2.20902	3.6466	8.39572	6.88664	8.96837	3.02919	7.58249	7.71141	5.70742	0.222672	1.65078	2.30234	0.820255	0.337764	2.50314	1.017	0.740127	Q9QX47	sp|Q9QX47|SON_MOUSE Protein SON OS=Mus musculus GN=Son PE=1 SV=2	2.7
KH.C1.405.v1.A.ND1-1	117	25	78	205	360	113	36	134	177	254	2.81515	0.628669	1.73061	4.56673	8.53553	2.68896	0.793472	3.32	4.54408	5.68428	0.223316	2.75282	2.63879	1.86907	0.295085	4.18414	1.3687	1.25092	A1VP90	sp|A1VP90|CBID_POLNA Putative cobalt-precorrin-6A synthase [deacetylating] OS=Polaromonas naphthalenivorans (strain CJ2) GN=cbiD PE=3 SV=1	0.11
KH.C2.375.v1.A.SL1-1	608	130	222	704	541	516	177	555	562	553	5.84856	1.30694	1.96919	6.26979	5.12808	4.90892	1.55967	5.49737	5.76817	4.94762	0.223463	1.50672	3.18395	0.817902	0.317721	3.52471	1.04926	0.857745	Q14146	sp|Q14146|URB2_HUMAN Unhealthy ribosome biogenesis protein 2 homolog OS=Homo sapiens GN=URB2 PE=1 SV=2	0.83
KH.L5.8.v4.A.SL3-1	126	27	55	150	299	111	55	117	131	287	1.7097	0.382895	0.688179	1.88441	3.99791	1.48958	0.683637	1.63475	1.89661	3.62208	0.223954	1.7973	2.73826	2.12157	0.458947	2.39126	1.16018	1.90977	Q02241	sp|Q02241|KIF23_HUMAN Kinesin-like protein KIF23 OS=Homo sapiens GN=KIF23 PE=1 SV=3	6e-78
KH.C12.108.v1.A.SL1-1	797	171	326	740	764	766	359	668	662	701	8.69905	1.95063	3.2811	7.47791	8.21711	8.26862	3.58939	7.5077	7.70953	7.11635	0.224235	1.68207	2.27908	1.09885	0.434099	2.09163	1.02688	0.923059	Q6P5B0	sp|Q6P5B0|RRP12_MOUSE RRP12-like protein OS=Mus musculus GN=Rrp12 PE=1 SV=1	8e-78
KH.C9.828.v1.A.SL1-1	419	90	190	748	728	323	159	555	665	680	11.1603	2.50536	4.66664	18.4459	19.1076	8.50854	3.87947	15.222	18.899	16.846	0.224489	1.86266	3.9527	1.03587	0.45595	3.92373	1.24156	0.891368	Q5ZJ66	sp|Q5ZJ66|SYEM_CHICK Probable glutamate--tRNA ligase, mitochondrial OS=Gallus gallus GN=EARS2 PE=2 SV=1	3e-63
KH.C11.151.v3.A.ND2-1	135	29	48	161	144	105	31	121	187	161	3.62779	0.814466	1.18943	4.00562	3.81314	2.79054	0.763104	3.3482	5.36175	4.02402	0.224507	1.46038	3.36768	0.951948	0.273461	4.3876	1.60138	0.750506	Q2YXU9	sp|Q2YXU9|TRPC_STAAB Indole-3-glycerol phosphate synthase OS=Staphylococcus aureus (strain bovine RF122 / ET3-1) GN=trpC PE=3 SV=1	2.7
KH.C5.94.v1.A.ND1-1	121	26	36	224	91	141	28	135	156	131	1.32612	0.297807	0.36382	2.27289	0.982764	1.52829	0.281104	1.52351	1.82422	1.33534	0.224571	1.22166	6.24729	0.432385	0.183934	5.41975	1.19738	0.732009	G5E8K5	sp|G5E8K5|ANK3_MOUSE Ankyrin-3 OS=Mus musculus GN=Ank3 PE=1 SV=1	4e-29
KH.C9.631.v1.B.ND1-1	237	51	90	197	172	181	77	167	176	167	10.9569	2.4642	3.83682	8.43221	7.83575	8.27579	3.26095	7.95012	8.68179	7.18096	0.224899	1.55702	2.19771	0.929264	0.394035	2.43798	1.09203	0.827129
KH.C8.65.v1.A.SL1-1	232	50	81	257	333	156	68	220	298	440	7.05453	1.58897	2.27119	7.23516	9.97783	4.69132	1.8941	6.88842	9.66836	12.444	0.225241	1.42935	3.18562	1.37907	0.403745	3.63678	1.40357	1.28708	A1L1M4	sp|A1L1M4|P4R2B_DANRE Serine/threonine-protein phosphatase 4 regulatory subunit 2-B OS=Danio rerio GN=ppp4r2b PE=1 SV=2	1e-12
KH.L63.22.v1.A.ND1-1	232	50	148	476	451	179	91	395	516	500	3.95308	0.890398	2.3254	7.50914	7.57245	3.01642	1.42037	6.93046	9.38111	7.92399	0.225241	2.61165	3.22918	1.00843	0.470881	4.87932	1.35361	0.844676	Q14318	sp|Q14318|FKBP8_HUMAN Peptidyl-prolyl cis-trans isomerase FKBP8 OS=Homo sapiens GN=FKBP8 PE=1 SV=2	1e-11
KH.C3.470.v1.A.SL3-1	153	33	67	241	231	116	44	224	187	241	3.3997	0.766354	1.37282	4.95794	5.05793	2.54916	0.895602	5.12524	4.4335	4.98072	0.225418	1.79136	3.61151	1.02017	0.351332	5.72267	0.865034	1.12343	Q2KJJ5	sp|Q2KJJ5|TBL3_BOVIN Transducin beta-like protein 3 OS=Bos taurus GN=TBL3 PE=2 SV=1	2e-96
KH.L153.50.v1.A.SL2-1	236	51	124	447	400	203	51	316	362	441	4.27528	0.965582	2.0714	7.49713	7.14043	3.63696	0.846323	5.89463	6.99709	7.43048	0.225852	2.14523	3.61936	0.952422	0.2327	6.96499	1.18703	1.06194	Q9CS74	sp|Q9CS74|SGT1_MOUSE Protein SGT1 homolog OS=Mus musculus GN=Ecd PE=1 SV=2	2e-34
KH.L153.101.v1.A.ND1-1	1376	298	433	1002	840	1017	440	992	1212	963	48.3276	10.9385	14.0234	32.5821	29.0715	35.3255	14.1561	35.8761	45.4188	31.4578	0.226341	1.28202	2.32341	0.892254	0.400732	2.53433	1.26599	0.692617	Q5ZIN1	sp|Q5ZIN1|NUDC_CHICK Nuclear migration protein nudC OS=Gallus gallus GN=NUDC PE=2 SV=1	2e-48
KH.C8.827.v1.A.SL1-1	591	128	182	485	525	473	180	412	521	531	16.7563	3.79285	4.75828	12.7311	14.6677	13.263	4.67493	12.0283	15.761	14.0026	0.226354	1.25454	2.67557	1.15211	0.35248	2.57293	1.31033	0.888437	O57476	sp|O57476|CDC37_CHICK Hsp90 co-chaperone Cdc37 OS=Gallus gallus GN=CDC37 PE=2 SV=1	1e-47
KH.C11.188.v1.C.nonSL4-1	166	36	57	119	103	109	51	113	156	104	7.14922	1.62039	2.26368	4.74496	4.37119	4.64267	2.01203	5.01125	7.16855	4.16591	0.226653	1.397	2.09613	0.921228	0.433378	2.49065	1.43049	0.581137	Q3T042	sp|Q3T042|NOB1_BOVIN RNA-binding protein NOB1 OS=Bos taurus GN=NOB1 PE=2 SV=1	9e-42
KH.L94.3.v1.A.SL1-1	166	36	91	493	526	287	48	202	305	527	2.65571	0.601924	1.34247	7.30222	8.29222	4.54094	0.703441	3.32768	5.2063	7.84169	0.226653	2.23029	5.43941	1.13557	0.154911	4.73057	1.56454	1.50619	Q54C94	sp|Q54C94|GEFF_DICDI Ras guanine nucleotide exchange factor F OS=Dictyostelium discoideum GN=gefF PE=2 SV=1	0.0002
KH.C7.295.v1.A.SL2-1	161	35	77	375	431	124	40	267	454	423	3.16737	0.719626	1.39686	6.83028	8.35529	2.4126	0.720851	5.40879	9.52982	7.73996	0.2272	1.94109	4.88975	1.22327	0.298787	7.50335	1.76191	0.812183	Q11120	sp|Q11120|OFD1_SCHPO PKHD-type hydroxylase ofd1 OS=Schizosaccharomyces pombe (strain 972 / ATCC 24843) GN=ofd1 PE=1 SV=1	0.03
KH.C5.603.v1.A.SL1-1	514	112	221	745	1140	300	125	473	808	1025	11.0526	2.51702	4.38211	14.8318	24.1556	6.37989	2.46221	10.4732	18.5383	20.4999	0.22773	1.74099	3.38462	1.62864	0.385933	4.25358	1.77007	1.10581	Q9Y2D8	sp|Q9Y2D8|ADIP_HUMAN Afadin- and alpha-actinin-binding protein OS=Homo sapiens GN=SSX2IP PE=1 SV=3	2e-05
KH.C1.581.v1.A.SL2-1	165	36	138	509	457	125	55	336	347	512	1.7487	0.398748	1.34865	4.9944	4.77264	1.31018	0.533957	3.66679	3.92388	5.04692	0.228026	3.3822	3.70327	0.955598	0.407545	6.86721	1.07011	1.2862	Q5PQN1	sp|Q5PQN1|HERC4_RAT Probable E3 ubiquitin-protein ligase HERC4 OS=Rattus norvegicus GN=Herc4 PE=2 SV=1	2e-86
KH.C9.8.v1.A.ND1-1	183	40	71	336	519	181	50	243	329	535	4.34549	0.992691	1.55466	7.3869	12.1442	4.25067	1.0876	5.9417	8.33566	11.8159	0.228442	1.56611	4.75146	1.64401	0.255867	5.46311	1.40291	1.41751	Q4KLQ5	sp|Q4KLQ5|WDR76_XENLA WD repeat-containing protein 76 OS=Xenopus laevis GN=wdr76 PE=2 SV=1	6e-26
KH.C14.144.v1.A.ND1-1	114	25	39	84	92	112	51	90	73	73	3.07808	0.705473	0.971019	2.09985	2.44779	2.99077	1.26141	2.50227	2.10307	1.83326	0.229193	1.37641	2.16252	1.1657	0.421769	1.9837	0.840465	0.871705	Q5ZK17	sp|Q5ZK17|SETD6_CHICK N-lysine methyltransferase SETD6 OS=Gallus gallus GN=SETD6 PE=2 SV=2	1e-20
KH.C3.192.v2.B.SL2-1	155	34	52	117	99	100	49	132	108	110	4.91779	1.12741	1.52135	3.43684	3.09518	3.13782	1.42412	4.3125	3.6561	3.24606	0.229252	1.34942	2.25907	0.900588	0.453857	3.02818	0.847792	0.887848	Q99L45	sp|Q99L45|IF2B_MOUSE Eukaryotic translation initiation factor 2 subunit 2 OS=Mus musculus GN=Eif2s2 PE=1 SV=1	8e-60
KH.C4.42.v2.A.SL1-1	305	67	164	886	450	388	166	348	475	518	3.79113	0.870382	1.87976	10.1962	5.5118	4.7697	1.89012	4.45415	6.29968	5.98859	0.229584	2.15969	5.42421	0.540574	0.396277	2.35654	1.41434	0.950617	P43368	sp|P43368|CAN3_PIG Calpain-3 OS=Sus scrofa GN=CAPN3 PE=2 SV=2	2e-111
KH.C14.172.v1.A.nonSL3-1	314	69	104	162	152	282	111	162	143	159	3.20921	0.737028	0.980146	1.53292	1.53082	2.85042	1.03921	1.70491	1.55941	1.51144	0.22966	1.32986	1.56397	0.998632	0.364583	1.64057	0.914662	0.969239	O75534	sp|O75534|CSDE1_HUMAN Cold shock domain-containing protein E1 OS=Homo sapiens GN=CSDE1 PE=1 SV=2	2e-19
KH.S688.1.v1.A.SL1-1	286	63	128	457	377	179	80	333	459	325	6.89246	1.58677	2.84451	10.1967	8.95286	4.26631	1.76609	8.2636	11.8026	7.2848	0.230219	1.79264	3.5847	0.878015	0.413961	4.67905	1.42826	0.61722	Q66I12	sp|Q66I12|CCD47_DANRE Coiled-coil domain-containing protein 47 OS=Danio rerio GN=ccdc47 PE=2 SV=1	4e-47
KH.C1.289.v1.A.ND1-1	648	143	254	622	645	467	246	494	641	643	14.2174	3.27905	5.13888	12.6349	13.945	10.1334	4.94418	11.1607	15.0059	13.1215	0.230636	1.56719	2.45869	1.10369	0.487911	2.25733	1.34453	0.874425	Q6P2Y3	sp|Q6P2Y3|DNJC2_XENTR DnaJ homolog subfamily C member 2 OS=Xenopus tropicalis GN=dnajc2 PE=2 SV=2	2e-47
KH.L108.35.v1.B.SL2-1	172	38	82	369	371	120	49	256	345	388	2.04322	0.471776	0.898231	4.05833	4.34282	1.4098	0.533206	3.13143	4.37281	4.2869	0.230899	1.90394	4.51813	1.0701	0.378214	5.87283	1.39643	0.980352	Q91YE6	sp|Q91YE6|IPO9_MOUSE Importin-9 OS=Mus musculus GN=Ipo9 PE=1 SV=3	6e-147
KH.C13.72.v1.B.ND1-1	172	38	55	154	93	143	67	117	145	94	3.35898	0.775583	0.990444	2.78442	1.78967	2.76188	1.19858	2.35278	3.02136	1.70739	0.230899	1.27703	2.81128	0.642745	0.433972	1.96297	1.28417	0.565105	O93257	sp|O93257|XRCC6_CHICK X-ray repair cross-complementing protein 5 OS=Gallus gallus GN=XRCC6 PE=2 SV=1	6e-18
KH.C14.180.v2.R.ND2-1	398	88	191	448	364	296	152	370	416	389	6.25251	1.44484	2.7669	6.51605	5.63488	4.59889	2.1874	5.98535	6.97302	5.6839	0.231082	1.91502	2.355	0.864769	0.475636	2.73629	1.16501	0.815128	Q0IIM3	sp|Q0IIM3|HS105_BOVIN Heat shock protein 105 kDa OS=Bos taurus GN=HSPH1 PE=2 SV=1	8e-104
KH.C7.588.v1.C.SL2-1	442	98	221	648	806	359	126	534	614	744	6.25414	1.44923	2.88354	8.48897	11.2381	5.02377	1.63316	7.78042	9.26979	9.79138	0.231723	1.98971	2.94394	1.32384	0.325086	4.76403	1.19142	1.05627	O13148	sp|O13148|EPA4A_DANRE Ephrin type-A receptor 4a (Fragment) OS=Danio rerio GN=epha4a PE=2 SV=1	1e-63
KH.L147.9.v1.A.ND1-1	315	70	92	224	211	268	99	228	257	215	6.82858	1.58593	1.83906	4.49576	4.50728	5.74573	1.96593	5.08946	5.94442	4.33495	0.232249	1.15961	2.44459	1.00256	0.342155	2.58883	1.16799	0.729247	Q8C4Y3	sp|Q8C4Y3|NELFB_MOUSE Negative elongation factor B OS=Mus musculus GN=Nelfb PE=1 SV=2	4e-83
KH.L149.18.v2.A.SL2-1	535	119	162	282	141	484	189	409	290	171	7.17989	1.66908	2.00478	3.50387	1.86464	6.42391	2.32348	5.65202	4.15258	2.13445	0.232466	1.20113	1.74775	0.532166	0.361692	2.43257	0.734707	0.514005	Q8BHB4	sp|Q8BHB4|WDR3_MOUSE WD repeat-containing protein 3 OS=Mus musculus GN=Wdr3 PE=2 SV=1	2e-77
KH.C5.80.v1.A.ND1-1	166	37	59	148	333	132	60	117	147	308	3.29868	0.768421	1.08112	2.72288	6.5206	2.59415	1.09218	2.39406	3.11677	5.69257	0.232948	1.40693	2.51858	2.39475	0.421017	2.19199	1.30188	1.82643	F1Q8W0	sp|F1Q8W0|CATIN_DANRE Cactin OS=Danio rerio GN=cactin PE=2 SV=1	8e-110
KH.L172.34.v1.B.SL1-1	403	90	150	231	225	340	183	236	249	232	16.0587	3.74813	5.5117	8.52223	8.83487	13.3991	6.6799	9.68355	10.5867	8.59844	0.233401	1.47052	1.54621	1.03669	0.498534	1.44965	1.09327	0.812191	P63155	sp|P63155|CRNL1_RAT Crooked neck-like protein 1 OS=Rattus norvegicus GN=Crnkl1 PE=2 SV=1	1e-117
KH.L8.2.v1.B.SL1-1	237	53	98	323	431	159	85	276	339	427	5.71767	1.33633	2.18015	7.21454	10.2461	3.79366	1.87846	6.85641	8.72623	9.5813	0.233719	1.63145	3.3092	1.42021	0.495159	3.65001	1.27271	1.09799	O00567	sp|O00567|NOP56_HUMAN Nucleolar protein 56 OS=Homo sapiens GN=NOP56 PE=1 SV=4	5e-85
KH.C6.98.v1.A.SL2-1	281	63	96	299	280	238	87	229	307	374	6.76477	1.58509	2.13111	6.66428	6.64227	5.66649	1.91858	5.67674	7.88572	8.37422	0.234315	1.34448	3.12713	0.996698	0.338583	2.95883	1.38913	1.06195	P97931	sp|P97931|UNG_MOUSE Uracil-DNA glycosylase OS=Mus musculus GN=Ung PE=2 SV=3	2e-57
KH.C1.765.v1.A.ND1-1	156	35	90	499	444	200	85	227	349	454	2.99107	0.701353	1.59123	8.85805	8.38875	3.79248	1.49291	4.48173	7.13977	8.09626	0.234482	2.2688	5.56678	0.94702	0.393651	3.002	1.59309	1.13397	Q44115	sp|Q44115|CPCE_SYNE7 Phycocyanobilin lyase subunit alpha OS=Synechococcus elongatus (strain PCC 7942) GN=cpcE PE=3 SV=2	1
KH.L131.5.v1.A.nonSL3-1	187	42	87	291	352	167	89	264	315	431	4.52345	1.0618	1.9406	6.51713	8.39041	3.99517	1.97211	6.57581	8.13009	9.69687	0.234733	1.82765	3.3583	1.28744	0.493624	3.3344	1.23636	1.19271	Q6TJY3	sp|Q6TJY3|KS6B1_BOVIN Ribosomal protein S6 kinase beta-1 OS=Bos taurus GN=RPS6KB1 PE=2 SV=1	3e-125
KH.C12.532.v1.A.ND1-1	405	91	143	601	827	241	118	447	695	799	7.84497	1.84223	2.55424	10.7782	15.7853	4.61683	2.09378	8.9158	14.3641	14.3949	0.234829	1.38649	4.21973	1.46456	0.453511	4.25823	1.61108	1.00215	A0JN76	sp|A0JN76|ZBT18_BOVIN Zinc finger and BTB domain-containing protein 18 OS=Bos taurus GN=ZBTB18 PE=2 SV=2	0.61
KH.C12.512.v1.A.SL1-1	169	38	62	212	220	135	37	156	212	178	5.48096	1.28801	1.85417	6.36562	7.0308	4.33006	1.09922	5.20968	7.33605	5.36928	0.234997	1.43956	3.43313	1.10449	0.253858	4.73943	1.40816	0.731903	Q28FE8	sp|Q28FE8|ADAT1_XENTR tRNA-specific adenosine deaminase 1 OS=Xenopus tropicalis GN=adat1 PE=2 SV=1	2e-31
KH.L144.2.v7.A.SL3-1	120	27	74	182	284	100	40	132	158	289	1.78668	0.42014	1.01598	2.50883	4.16672	1.4725	0.545554	2.02374	2.51002	4.0021	0.235152	2.41819	2.46937	1.66082	0.370495	3.70952	1.24029	1.59445	Q6ZPK0	sp|Q6ZPK0|PF21A_MOUSE PHD finger protein 21A OS=Mus musculus GN=Phf21a PE=1 SV=2	4e-08
KH.L157.1.v1.A.nonSL13-1	151	34	38	62	50	119	38	48	49	61	2.51892	0.592764	0.584533	0.957554	0.821899	1.96324	0.580675	0.824508	0.872146	0.946438	0.235325	0.986114	1.63815	0.858332	0.295774	1.41991	1.05778	1.08518	A3KP59	sp|A3KP59|NO66_DANRE Bifunctional lysine-specific demethylase and histidyl-hydroxylase NO66 OS=Danio rerio GN=no66 PE=2 SV=1	6e-75
KH.C11.243.v2.A.SL2-1	500	113	207	467	788	390	174	392	376	775	7.11258	1.67997	2.71529	6.15048	11.0457	5.48671	2.26735	5.74196	5.70691	10.2538	0.236197	1.61627	2.26513	1.79592	0.413245	2.53245	0.993897	1.79673	Q9UKV3	sp|Q9UKV3|ACINU_HUMAN Apoptotic chromatin condensation inducer in the nucleus OS=Homo sapiens GN=ACIN1 PE=1 SV=2	1e-13
KH.L141.70.v1.A.SL1-1	849	192	330	1070	1241	715	279	818	979	1154	14.9847	3.54167	5.37085	17.4847	21.5836	12.4806	4.51084	14.8666	18.4365	18.944	0.236352	1.51648	3.25549	1.23443	0.361427	3.29574	1.24013	1.02753	Q4V7Y7	sp|Q4V7Y7|KTNB1_XENLA Katanin p80 WD40 repeat-containing subunit B1 OS=Xenopus laevis GN=katnb1 PE=1 SV=1	1e-51
KH.C1.751.v1.A.ND1-1	358	81	139	666	708	354	144	214	508	647	7.39961	1.74975	2.64929	12.7449	14.4202	7.23635	2.72647	4.55466	11.2033	12.4382	0.236466	1.51409	4.81067	1.13145	0.376775	1.67053	2.45974	1.11022	Q969K4	sp|Q969K4|ABTB1_HUMAN Ankyrin repeat and BTB/POZ domain-containing protein 1 OS=Homo sapiens GN=ABTB1 PE=2 SV=1	1e-50
KH.C13.77.v1.B.SL2-1	287	65	89	245	238	156	79	220	246	237	7.68053	1.81798	2.19628	6.07031	6.27622	4.12881	1.93664	6.06246	7.02426	5.89907	0.2367	1.20809	2.7639	1.03392	0.469057	3.1304	1.15865	0.839813	Q9NVP1	sp|Q9NVP1|DDX18_HUMAN ATP-dependent RNA helicase DDX18 OS=Homo sapiens GN=DDX18 PE=1 SV=2	1e-118
KH.C13.174.v1.A.SL1-1	519	118	217	526	456	367	165	431	492	485	9.30894	2.21198	3.58907	8.73482	8.05953	6.51013	2.711	7.96026	9.41574	8.09097	0.237619	1.62256	2.43373	0.92269	0.416429	2.93628	1.18284	0.859303	Q9H845	sp|Q9H845|ACAD9_HUMAN Acyl-CoA dehydrogenase family member 9, mitochondrial OS=Homo sapiens GN=ACAD9 PE=1 SV=1	2e-106
KH.C14.426.v4.A.SL5-2	123	28	38	112	146	104	55	75	96	145	2.1409	0.50935	0.609908	1.80487	2.50413	1.79026	0.876936	1.34422	1.78287	2.34739	0.237913	1.19742	2.95924	1.38743	0.489838	1.53286	1.32632	1.31664	P28347	sp|P28347|TEAD1_HUMAN Transcriptional enhancer factor TEF-1 OS=Homo sapiens GN=TEAD1 PE=1 SV=2	8e-121
KH.C9.617.v1.R.ND1-1	289	66	126	284	289	224	104	233	283	296	2.77058	0.661276	1.11386	2.52073	2.73012	2.12379	0.913312	2.30009	2.89478	2.63931	0.238678	1.68442	2.26305	1.08307	0.430039	2.51841	1.25855	0.911748	Q8CFQ3	sp|Q8CFQ3|AQR_MOUSE Intron-binding protein aquarius OS=Mus musculus GN=Aqr PE=2 SV=2	0
KH.C7.16.v2.A.SL4-1	162	37	82	227	405	118	62	174	211	354	4.58448	1.09432	2.13982	5.94752	11.2938	3.30253	1.60724	5.07039	6.37109	9.3176	0.2387	1.9554	2.77945	1.89892	0.486668	3.15472	1.25653	1.46248	Q9WU56	sp|Q9WU56|TRUA_MOUSE tRNA pseudouridine synthase A, mitochondrial OS=Mus musculus GN=Pus1 PE=1 SV=2	5e-41
KH.L44.2.v1.A.SL1-1	105	24	48	291	285	113	55	106	175	324	2.38938	0.570785	1.00722	6.13089	6.39075	2.5431	1.14649	2.48381	4.24903	6.8575	0.238885	1.76463	6.08693	1.04239	0.450824	2.16644	1.71069	1.6139	O88831	sp|O88831|KKCC2_RAT Calcium/calmodulin-dependent protein kinase kinase 2 OS=Rattus norvegicus GN=Camkk2 PE=1 SV=1	4e-64
KH.C12.614.v1.A.SL1-1	677	155	275	831	1135	466	212	620	858	1022	12.7485	3.05048	4.77521	14.4879	21.061	8.67855	3.65696	12.0221	17.2391	17.8998	0.239282	1.56539	3.03399	1.45369	0.421379	3.28745	1.43395	1.03832	Q4R6X7	sp|Q4R6X7|UBP16_MACFA Ubiquitin carboxyl-terminal hydrolase 16 OS=Macaca fascicularis GN=USP16 PE=2 SV=2	3e-31
KH.C7.80.v3.C.nonSL3-2	170	39	47	86	65	127	60	98	94	67	2.1727	0.520932	0.553907	1.01762	0.818607	1.60526	0.702449	1.28971	1.28184	0.796436	0.239763	1.0633	1.83716	0.804436	0.437593	1.83602	0.993897	0.621322	P49696	sp|P49696|SYVC_TAKRU Valine--tRNA ligase OS=Takifugu rubripes GN=vars PE=3 SV=1	3e-103
KH.C7.239.v1.A.SL1-1	170	39	53	253	274	107	48	172	262	309	6.60001	1.58244	1.89741	9.09392	10.4823	4.10837	1.70706	6.87608	10.8531	11.1578	0.239763	1.19904	4.79282	1.15267	0.415509	4.02801	1.57838	1.02808	B0JZ89	sp|B0JZ89|FA32A_XENTR Protein FAM32A OS=Xenopus tropicalis GN=fam32a PE=3 SV=1	5e-15
KH.C3.713.v1.A.SL1-1	204	47	116	455	590	172	35	323	419	649	4.65156	1.12004	2.43902	9.60539	13.2566	3.87871	0.731054	7.58382	10.1939	13.7638	0.240787	2.17762	3.93822	1.38012	0.188479	10.3738	1.34416	1.35021	O88898	sp|O88898|P63_MOUSE Tumor protein 63 OS=Mus musculus GN=Tp63 PE=1 SV=1	1e-24
KH.C2.449.v1.A.SL2-1	130	30	62	265	321	116	41	180	223	315	2.52137	0.608108	1.10885	4.75855	6.13494	2.22506	0.728435	3.59487	4.61482	5.68238	0.241182	1.82345	4.29142	1.28925	0.327377	4.93506	1.28372	1.23133	A2AQ19	sp|A2AQ19|RTF1_MOUSE RNA polymerase-associated protein RTF1 homolog OS=Mus musculus GN=Rtf1 PE=1 SV=1	3e-68
KH.C4.162.v1.A.SL1-1	390	90	178	744	716	336	132	607	803	709	6.64777	1.60332	2.79782	11.7414	12.0264	5.66423	2.0611	10.6541	14.6044	11.2404	0.241182	1.74502	4.19662	1.02428	0.363879	5.16914	1.37078	0.769662	Q6BER5	sp|Q6BER5|NU301_CAEEL Nucleosome-remodeling factor subunit NURF301-like OS=Caenorhabditis elegans GN=nurf-1 PE=1 SV=2	0.0005
KH.C10.601.v1.A.SL1-1	481	111	189	677	615	393	113	579	722	679	8.80158	2.12278	3.18909	11.4694	11.0893	7.11211	1.89412	10.9097	14.0964	11.5561	0.241182	1.50232	3.59644	0.966859	0.266323	5.75975	1.29211	0.819789	Q8WTT2	sp|Q8WTT2|NOC3L_HUMAN Nucleolar complex protein 3 homolog OS=Homo sapiens GN=NOC3L PE=1 SV=1	9e-20
KH.C2.911.v1.A.SL1-1	221	51	128	319	232	196	91	292	340	228	5.73475	1.38312	3.06282	7.66387	5.93228	5.03001	2.1631	7.80228	9.41363	5.50279	0.241182	2.21443	2.50223	0.774059	0.430039	3.60699	1.20652	0.584555	Q90YI3	sp|Q90YI3|SYMM_TAKRU Methionine--tRNA ligase, mitochondrial OS=Takifugu rubripes GN=mars2 PE=3 SV=1	4e-72
KH.C8.917.v1.A.SL1-1	143	33	76	238	241	127	42	167	252	219	2.10765	0.508326	1.03292	3.24769	3.50019	1.85121	0.567055	2.53452	3.96296	3.00215	0.241182	2.03199	3.1442	1.07775	0.306315	4.46962	1.56359	0.757553	Q5PPG7	sp|Q5PPG7|EIF2D_RAT Eukaryotic translation initiation factor 2D OS=Rattus norvegicus GN=Eif2d PE=2 SV=1	2e-20
KH.C9.775.v2.A.SL1-1	294	68	85	286	318	234	95	164	247	295	7.981	1.92923	2.12774	7.18805	8.50646	6.28227	2.36236	4.58428	7.15424	7.44831	0.241728	1.10289	3.37826	1.18342	0.376037	1.94055	1.5606	1.04111	Q9H1J1	sp|Q9H1J1|REN3A_HUMAN Regulator of nonsense transcripts 3A OS=Homo sapiens GN=UPF3A PE=1 SV=1	7e-14
KH.C3.698.v1.A.SL1-1	177	41	62	303	356	137	46	225	333	366	4.84553	1.17305	1.56512	7.67973	9.60352	3.70919	1.15356	6.34261	9.72678	9.31913	0.24209	1.33423	4.90679	1.2505	0.311	5.4983	1.53356	0.95809	A4IHS0	sp|A4IHS0|MRRP1_XENTR Mitochondrial ribonuclease P protein 1 OS=Xenopus tropicalis GN=trmt10c PE=2 SV=1	8e-06
KH.C9.474.v2.A.ND1-1	371	86	202	654	719	278	134	499	602	684	5.14507	1.24647	2.5832	8.39712	9.82558	3.81287	1.7023	7.12582	8.90779	8.82265	0.242265	2.07241	3.25067	1.17011	0.44646	4.186	1.25007	0.990442	Q92766	sp|Q92766|RREB1_HUMAN Ras-responsive element-binding protein 1 OS=Homo sapiens GN=RREB1 PE=1 SV=3	1e-15
KH.C3.907.v1.A.SL2-1	125	29	46	169	147	101	37	129	150	146	2.08366	0.505221	0.707072	2.60819	2.41461	1.66506	0.564978	2.21423	2.66787	2.26358	0.242468	1.39953	3.68872	0.925779	0.339315	3.91915	1.20487	0.84846	P33224	sp|P33224|AIDB_ECOLI Putative acyl-CoA dehydrogenase AidB OS=Escherichia coli (strain K12) GN=aidB PE=1 SV=3	8e-06
KH.L141.74.v1.A.SL1-1	206	48	216	678	801	169	67	498	536	783	4.04563	0.985204	3.91166	12.3277	15.5011	3.28243	1.20533	10.0708	11.2316	14.3023	0.243523	3.97041	3.15154	1.25742	0.367207	8.35523	1.11526	1.27341	Q8VCD5	sp|Q8VCD5|MED17_MOUSE Mediator of RNA polymerase II transcription subunit 17 OS=Mus musculus GN=Med17 PE=1 SV=1	6e-39
KH.S346.8.v1.B.SL1-1	206	48	117	449	649	142	67	325	368	544	3.87594	0.943881	2.02995	7.82152	12.0328	2.64234	1.15478	6.29666	7.38778	9.51995	0.243523	2.15064	3.85307	1.53842	0.437028	5.45271	1.17329	1.28861	Q9Y3Q0	sp|Q9Y3Q0|NALD2_HUMAN N-acetylated-alpha-linked acidic dipeptidase 2 OS=Homo sapiens GN=NAALAD2 PE=1 SV=1	1e-66
KH.C3.293.v1.A.SL1-1	686	161	357	893	946	527	254	710	878	946	11.2897	2.76919	5.41773	13.6065	15.3413	8.57751	3.82919	12.0319	15.4174	14.4803	0.245283	1.95643	2.51148	1.1275	0.446422	3.14216	1.28137	0.939218	Q9D4H8	sp|Q9D4H8|CUL2_MOUSE Cullin-2 OS=Mus musculus GN=Cul2 PE=1 SV=2	2e-107
KH.L171.3.v3.A.SL1-1	187	44	75	232	253	136	53	168	203	243	3.14726	0.773945	1.16397	3.61505	4.19589	2.26371	0.81711	2.9115	3.64539	3.80385	0.245911	1.50394	3.1058	1.16067	0.360961	3.56317	1.25206	1.04347	Q9BUQ8	sp|Q9BUQ8|DDX23_HUMAN Probable ATP-dependent RNA helicase DDX23 OS=Homo sapiens GN=DDX23 PE=1 SV=3	3e-178
KH.L65.28.v1.A.nonSL2-1	123	29	46	101	120	101	46	106	112	92	3.51595	0.866366	1.21251	2.67297	3.38011	2.85528	1.2045	3.12004	3.41595	2.44597	0.24641	1.39953	2.2045	1.26455	0.421851	2.59031	1.09484	0.716044	Q9QZR0	sp|Q9QZR0|RNF25_MOUSE E3 ubiquitin-protein ligase RNF25 OS=Mus musculus GN=Rnf25 PE=1 SV=2	3e-12
KH.C10.563.v1.A.SL1-1	237	56	139	608	746	198	75	476	618	774	5.07457	1.25316	2.74444	12.0528	15.7399	4.19282	1.47104	10.4948	14.1187	15.4141	0.246948	2.19003	4.39173	1.30591	0.350848	7.13427	1.34531	1.09175	Q9UJV9	sp|Q9UJV9|DDX41_HUMAN Probable ATP-dependent RNA helicase DDX41 OS=Homo sapiens GN=DDX41 PE=1 SV=2	1e-152
KH.C14.208.v1.A.SL1-1	207	49	142	427	440	151	73	360	411	439	2.84199	0.703096	1.79775	5.42769	5.95274	2.05031	0.918097	5.08946	6.02075	5.60587	0.247396	2.55691	3.01916	1.09673	0.447784	5.54349	1.18298	0.931091	P28339	sp|P28339|DPOD1_BOVIN DNA polymerase delta catalytic subunit OS=Bos taurus GN=POLD1 PE=1 SV=1	0
KH.C9.135.v1.A.SL2-1	2571	609	772	1317	1283	1794	828	1263	1411	1391	51.9557	12.8622	14.3859	24.6406	25.5487	35.8545	15.3276	26.2815	30.4238	26.1447	0.247561	1.11847	1.71283	1.03685	0.427495	1.71465	1.15761	0.859349	Q9NR30	sp|Q9NR30|DDX21_HUMAN Nucleolar RNA helicase 2 OS=Homo sapiens GN=DDX21 PE=1 SV=5	5e-89
KH.L65.10.v2.A.ND3-1	118	28	26	50	59	153	55	32	40	60	1.46432	0.363144	0.29752	0.57446	0.72147	1.87774	0.625216	0.408904	0.529628	0.692519	0.247995	0.819291	1.93083	1.25591	0.332961	0.65402	1.29524	1.30756	Q5ZIU3	sp|Q5ZIU3|DYRK2_CHICK Dual specificity tyrosine-phosphorylation-regulated kinase 2 OS=Gallus gallus GN=DYRK2 PE=2 SV=1	2e-160
KH.S861.1.v1.A.ND1-1	185	44	77	258	246	114	61	238	331	263	4.3999	1.09368	1.68869	5.68102	5.76525	2.68143	1.32897	5.82861	8.39954	5.81772	0.248569	1.54405	3.36415	1.01483	0.495619	4.38582	1.44109	0.692624	Q00808	sp|Q00808|HETE1_PODAS Vegetative incompatibility protein HET-E-1 OS=Podospora anserina GN=HET-E1 PE=4 SV=1	5e-07
KH.C11.236.v3.B.nonSL3-1	231	55	99	251	218	167	64	193	237	215	3.24023	0.806293	1.28052	3.25966	3.01323	2.3167	0.82235	2.78765	3.54706	2.80497	0.248838	1.58816	2.54557	0.924399	0.354966	3.38985	1.27242	0.790787	P09874	sp|P09874|PARP1_HUMAN Poly [ADP-ribose] polymerase 1 OS=Homo sapiens GN=PARP1 PE=1 SV=4	3e-121
KH.C7.260.v1.A.SL1-1	277	66	126	999	646	232	74	323	904	902	11.9524	2.97637	5.01345	39.9096	27.4676	9.90046	2.92497	14.3515	41.62	36.2001	0.249018	1.68442	7.96052	0.688246	0.295438	4.90653	2.90005	0.869777	P24043	sp|P24043|LAMA2_HUMAN Laminin subunit alpha-2 OS=Homo sapiens GN=LAMA2 PE=1 SV=4	0.0002
KH.C8.200.v2.A.nonSL4-1	214	51	92	173	197	174	68	165	179	179	3.28335	0.817785	1.30161	2.45745	2.97839	2.64023	0.955707	2.60678	2.9303	2.55436	0.249071	1.59162	1.88801	1.21198	0.361978	2.72759	1.12411	0.871705	P52590	sp|P52590|NU107_RAT Nuclear pore complex protein Nup107 OS=Rattus norvegicus GN=Nup107 PE=1 SV=1	4e-43
KH.C14.461.v1.A.SL1-1	1174	280	520	1399	1174	954	412	1244	1222	1183	23.8844	5.95347	9.75525	26.3511	23.5356	19.1949	7.67815	26.0605	26.5261	22.385	0.249262	1.63858	2.70123	0.893156	0.400011	3.39412	1.01787	0.843885	Q6NY74	sp|Q6NY74|RFA1_DANRE Replication protein A 70 kDa DNA-binding subunit OS=Danio rerio GN=rpa1 PE=1 SV=1	5e-69
KH.C14.205.v1.A.SL1-1	251	60	110	312	211	247	129	273	316	227	12.967	3.23955	5.2402	14.923	10.7414	12.6198	6.10477	14.5227	17.4185	10.9073	0.249829	1.61757	2.84779	0.719788	0.483744	2.3789	1.1994	0.626193	Q4V7D8	sp|Q4V7D8|CR021_RAT UPF0711 protein C18orf21 homolog OS=Rattus norvegicus PE=2 SV=1	0.028
KH.L170.61.v1.A.SL2-1	414	99	129	304	233	269	145	296	279	308	11.932	2.98205	3.42841	8.1119	6.61731	7.66755	3.8282	8.78461	8.57974	8.25639	0.24992	1.14968	2.36608	0.815754	0.499273	2.29471	0.976679	0.962312	O43818	sp|O43818|U3IP2_HUMAN U3 small nucleolar RNA-interacting protein 2 OS=Homo sapiens GN=RRP9 PE=1 SV=1	2e-75
KH.C7.107.v1.A.SL2-1	380	91	122	475	557	303	158	323	356	540	8.02269	2.00791	2.37512	9.28465	11.5879	6.32659	3.05567	7.02192	8.01942	10.6037	0.250279	1.18288	3.90913	1.24807	0.482989	2.298	1.14205	1.32225	P17706	sp|P17706|PTN2_HUMAN Tyrosine-protein phosphatase non-receptor type 2 OS=Homo sapiens GN=PTPN2 PE=1 SV=2	3e-53
KH.C9.93.v1.B.SL3-1	125	30	88	262	365	111	55	189	241	310	2.02192	0.507155	1.31258	3.92364	5.81779	1.77569	0.814946	3.14798	4.15936	4.66381	0.250829	2.58812	2.98927	1.48275	0.458947	3.8628	1.32128	1.12128	Q18DN4	sp|Q18DN4|HMU_HALWD Halomucin OS=Haloquadratum walsbyi (strain DSM 16790 / HBSQ001) GN=hmu PE=4 SV=1	0.006
KH.L65.16.v1.A.SL1-1	154	37	70	230	269	117	54	193	203	327	3.58545	0.900309	1.50283	4.95777	6.17146	2.69401	1.15168	4.62698	5.04285	7.08104	0.2511	1.66924	3.29895	1.2448	0.427495	4.0176	1.08988	1.40418	Q3THK3	sp|Q3THK3|T2FA_MOUSE General transcription factor IIF subunit 1 OS=Mus musculus GN=Gtf2f1 PE=1 SV=2	2e-12
KH.L75.4.v2.A.SL1-1	460	111	188	437	511	433	185	357	383	523	4.60275	1.16078	1.73463	4.04834	5.0384	4.28488	1.69568	3.67828	4.08898	4.86729	0.252192	1.49437	2.33383	1.24456	0.395737	2.1692	1.11166	1.19034	Q7TP40	sp|Q7TP40|PCNP_RAT PEST proteolytic signal-containing nuclear protein OS=Rattus norvegicus GN=Pcnp PE=2 SV=1	2e-15
KH.C14.14.v1.A.SL2-1	145	35	76	235	188	120	43	143	216	224	1.83097	0.4619	0.884945	2.74737	2.33929	1.4986	0.497388	1.85937	2.91021	2.6308	0.25227	1.91588	3.10456	0.851465	0.331902	3.73827	1.56515	0.903991	Q8NB14	sp|Q8NB14|UBP38_HUMAN Ubiquitin carboxyl-terminal hydrolase 38 OS=Homo sapiens GN=USP38 PE=2 SV=2	9e-35
KH.C7.279.v1.A.SL1-1	1460	353	473	1151	1529	1158	506	1076	1123	1453	30.0948	7.60465	8.9906	21.9659	31.0569	23.6068	9.55438	22.8385	24.6987	27.8567	0.25269	1.18225	2.44321	1.41387	0.404729	2.39037	1.08145	1.12786	Q6NVR9	sp|Q6NVR9|ATAD3_XENTR ATPase family AAA domain-containing protein 3 OS=Xenopus tropicalis GN=atad3 PE=2 SV=1	8e-172
KH.C2.527.v2.A.nonSL4-1	339	82	149	341	364	253	122	271	346	373	4.09576	1.03542	1.66001	3.81439	4.3336	3.02305	1.35023	3.37148	4.46033	4.1915	0.252802	1.60323	2.29781	1.13612	0.446645	2.49697	1.32296	0.939728	Q6ZU65	sp|Q6ZU65|UBN2_HUMAN Ubinuclein-2 OS=Homo sapiens GN=UBN2 PE=1 SV=2	2e-25
KH.C4.768.v1.A.SL1-1	235	57	165	712	704	205	91	497	693	677	4.71531	1.19532	3.05292	13.2269	13.9196	4.06805	1.67262	10.2687	14.8365	12.6345	0.253497	2.55406	4.33254	1.05237	0.411159	6.1393	1.44483	0.851579	Q6BER5	sp|Q6BER5|NU301_CAEEL Nucleosome-remodeling factor subunit NURF301-like OS=Caenorhabditis elegans GN=nurf-1 PE=1 SV=2	8e-06
KH.C3.845.v1.C.nonSL2-1	206	50	58	163	129	125	44	134	162	116	5.41059	1.3725	1.40473	3.96369	3.33871	3.24697	1.05863	3.62409	4.53992	2.83375	0.25367	1.02348	2.82167	0.842323	0.326036	3.42339	1.25271	0.624184	P55302	sp|P55302|AMRP_MOUSE Alpha-2-macroglobulin receptor-associated protein OS=Mus musculus GN=Lrpap1 PE=1 SV=1	3e-06
KH.C7.709.v2.A.ND2-1	585	142	280	925	950	539	204	674	761	842	4.33862	1.10065	1.91489	6.35145	6.94275	3.95344	1.38592	5.14722	6.02195	5.8081	0.253687	1.73977	3.31688	1.0931	0.350561	3.71393	1.16994	0.964488	Q7TN88	sp|Q7TN88|PK1L2_MOUSE Polycystic kidney disease protein 1-like 2 OS=Mus musculus GN=Pkd1l2 PE=2 SV=1	7e-18
KH.C4.448.v1.A.SL1-1	440	107	235	678	976	301	125	505	628	888	9.86399	2.50697	4.85799	14.0723	21.5606	6.67355	2.56698	11.6576	15.0216	18.5156	0.254154	1.93779	2.89673	1.53213	0.38465	4.54135	1.28857	1.2326	Q5RL51	sp|Q5RL51|GSTCD_MOUSE Glutathione S-transferase C-terminal domain-containing protein OS=Mus musculus GN=Gstcd PE=2 SV=1	3e-36
KH.C1.399.v1.A.SL2-1	300	73	137	346	277	262	133	305	349	294	6.83022	1.73701	2.87622	7.29331	6.21448	5.89936	2.77382	7.15039	8.47803	6.22568	0.254313	1.65585	2.53572	0.85208	0.47019	2.57782	1.18567	0.73433	P40826	sp|P40826|UBP14_RABIT Ubiquitin carboxyl-terminal hydrolase 14 OS=Oryctolagus cuniculus GN=USP14 PE=1 SV=3	9e-58
KH.C1.753.v1.A.nonSL2-1	997	243	337	703	771	927	358	650	692	716	11.3839	2.89979	3.54824	7.43165	8.67483	10.468	3.74447	7.64231	8.43057	7.60385	0.254728	1.22362	2.09446	1.16728	0.357706	2.04096	1.10314	0.901938	Q8IY37	sp|Q8IY37|DHX37_HUMAN Probable ATP-dependent RNA helicase DHX37 OS=Homo sapiens GN=DHX37 PE=1 SV=1	3e-83
KH.L116.16.v2.A.SL1-1	3399	829	1141	1873	1550	3033	1385	1601	1585	1463	33.683	8.5858	10.4264	17.1843	15.1357	29.7251	12.5725	16.3368	16.7589	13.4844	0.2549	1.21438	1.64816	0.880787	0.422961	1.29941	1.02583	0.804609	Q8CGC7	sp|Q8CGC7|SYEP_MOUSE Bifunctional glutamate/proline--tRNA ligase OS=Mus musculus GN=Eprs PE=1 SV=4	3e-179
KH.C4.262.v1.A.SL2-1	131	32	89	504	302	117	37	258	489	345	2.27927	0.581891	1.42792	8.11879	5.17779	2.01327	0.589712	4.62234	9.07801	5.58304	0.255296	2.45393	5.68574	0.637754	0.292913	7.8383	1.96394	0.615007	Q9NVA2	sp|Q9NVA2|SEP11_HUMAN Septin-11 OS=Homo sapiens GN=SEPT11 PE=1 SV=3	2e-124
KH.S665.3.v1.A.SL1-1	257	63	81	297	302	141	66	211	332	333	7.11731	1.82343	2.06851	7.61508	8.24142	3.86182	1.67433	6.01703	9.81019	8.57735	0.256197	1.1344	3.68144	1.08225	0.433558	3.5937	1.6304	0.874331	Q9UU79	sp|Q9UU79|NSA2_SCHPO Ribosome biogenesis protein nsa2 OS=Schizosaccharomyces pombe (strain 972 / ATCC 24843) GN=nsa2 PE=1 SV=1	8.8
KH.L39.4.v2.A.ND2-1	676	166	301	776	1115	528	258	660	652	1075	7.92435	2.03372	3.25366	8.42197	12.8796	6.12126	2.77045	7.96668	8.15494	11.7206	0.256642	1.59986	2.58846	1.52929	0.452594	2.8756	1.02363	1.43724	Q505K2	sp|Q505K2|F16A1_MOUSE Protein FAM160A1 OS=Mus musculus GN=Fam160a1 PE=2 SV=2	4e-62
KH.C1.561.v1.A.ND1-1	509	125	353	1367	136	700	249	708	834	102	11.8934	3.05256	7.60592	29.5728	3.13141	16.1762	5.32968	17.0349	20.7927	2.21674	0.25666	2.49165	3.88812	0.105888	0.329476	3.19623	1.2206	0.106611	Q8WQ47	sp|Q8WQ47|TBA_LEPDS Tubulin alpha chain OS=Lepidoglyphus destructor PE=1 SV=2	3e-170
KH.L119.9.v1.A.ND1-1	187	46	80	248	225	216	71	205	324	268	4.00777	1.03035	1.58103	4.92094	4.75177	4.57831	1.3939	4.5241	7.40905	5.34222	0.257088	1.53446	3.11249	0.965623	0.304458	3.24563	1.63769	0.72104	A2VD13	sp|A2VD13|PTCD1_RAT Pentatricopeptide repeat-containing protein 1, mitochondrial OS=Rattus norvegicus GN=Ptcd1 PE=2 SV=1	6e-10
KH.L131.2.v1.A.ND1-1	772	190	326	759	1224	559	276	613	742	1139	13.2589	3.41045	5.16295	12.0689	20.715	9.49497	4.34224	10.841	13.5973	18.1945	0.257219	1.51386	2.3376	1.71639	0.45732	2.49663	1.25425	1.3381	Q04750	sp|Q04750|TOP1_MOUSE DNA topoisomerase 1 OS=Mus musculus GN=Top1 PE=1 SV=2	1e-150
KH.C8.691.v1.A.nonSL3-1	154	38	38	118	75	121	53	97	95	96	3.15858	0.814555	0.718692	2.24072	1.51581	2.45441	0.995771	2.04861	2.07898	1.83133	0.257887	0.882313	3.11778	0.676482	0.405708	2.05731	1.01483	0.880881	Q91WR3	sp|Q91WR3|ASCC2_MOUSE Activating signal cointegrator 1 complex subunit 2 OS=Mus musculus GN=Ascc2 PE=2 SV=1	5e-16
[truncated: 273 more rows]

## Sheet: early II-late II
Upregulated genes in early stage II-late II	Set 1 (reads)					Set 2 (reads)					Set 1 (RPKM)					Set 2 (RPKM)					Set 1 (Ratio)				Set 2 (Ratio)
[truncated: 936 more rows]

## Sheet: late II-late III
Upregulated genes in late stage II-late III	Set 1 (reads)					Set 2 (reads)					Set 1 (RPKM)					Set 2 (RPKM)					Set 1 (Ratio)				Set 2 (Ratio)
[truncated: 574 more rows]

## Sheet: Stage IV
Upregulated genes in stage IV	Set 1 (reads)					Set 2 (reads)					Set 1 (RPKM)					Set 2 (RPKM)					Set 1 (Ratio)				Set 2 (Ratio)
[truncated: 751 more rows]
