# Supplementary material for: The regulation of oocyte maturation and ovulation in the closest sister group of vertebrates
Source: eLife. 2019 Oct 1;8:e49062. doi: 10.7554/eLife.49062 (PMC6786877; doi:10.7554/eLife.49062)
Supplement: Supplementary file 2. — DEGs (upregulated (>2 fold) or downregulated (<0.5 fold) genes) in early stage III follicles following MEK-inhibition for 24 hr are shown. Gene ID (column A), reads mapped to the cDNA library (column B-G), RPKM (column H-M), ratio (column N-P), UniProt ID (column Q), homologous protein (column R), and E-value (column S) are shown. [file elife-49062-supp2.xlsx]

## Sheet: late stage II
Upregulated genes in MEK-inhibited follicles	Reads						RPKM						Ratio
Gene ID	Control (C)1	MEK inh. (M)1	C2	M2	C3	M3	C1	M1	C2	M2	C3	M3	M1/C1	M2/C2	M3/C3	UniProt ID	Homologous protein	E-value
KH.L27.2.v1.C.ND1-1	0	171	0	1429	0	1141	0	10.4728	0	67.7598	0	67.2257	#DIV/0!	#DIV/0!	#DIV/0!	Q58EX2	sp|Q58EX2|SDK2_HUMAN Protein sidekick-2 OS=Homo sapiens GN=SDK2 PE=1 SV=3	3.2
KH.C4.115.v1.A.SL1-1	0	233	0	312	0	821	0	7.37128	0	7.64216	0	24.987	#DIV/0!	#DIV/0!	#DIV/0!	P0C6U5	sp|P0C6U5|R1A_CVHN5 Replicase polyprotein 1a OS=Human coronavirus HKU1 (isolate N5) GN=1a PE=3 SV=1	0.2
KH.C10.175.v1.A.ND1-1	0	210	0	421	0	627	0	6.31969	0	9.80918	0	18.1522	#DIV/0!	#DIV/0!	#DIV/0!	0	0	0
KH.L18.100.v1.A.ND1-1	0	460	0	830	0	547	0	13.9162	0	19.4409	0	15.9197	#DIV/0!	#DIV/0!	#DIV/0!	Q6ZCX3	sp|Q6ZCX3|FH6_ORYSJ Formin-like protein 6 OS=Oryza sativa subsp. japonica GN=FH6 PE=2 SV=2	0.27
KH.C11.222.v2.A.ND2-2	0	118	0	570	0	475	0	2.89869	0	10.841	0	11.2253	#DIV/0!	#DIV/0!	#DIV/0!	FALSE	FALSE	FALSE
KH.C10.617.v1.A.SL1-1	0	389	0	487	0	418	0	6.76994	0	6.56204	0	6.99836	#DIV/0!	#DIV/0!	#DIV/0!	Q80ZF8	sp|Q80ZF8|BAI3_MOUSE Brain-specific angiogenesis inhibitor 3 OS=Mus musculus GN=Bai3 PE=1 SV=2	5e-07
KH.C9.356.v2.A.SL1-1	0	278	0	349	0	389	0	9.48296	0	9.2172	0	12.7654	#DIV/0!	#DIV/0!	#DIV/0!	FALSE	FALSE	FALSE
KH.C3.245.v1.A.SL1-1	0	126	0	213	0	360	0	1.90304	0	2.49076	0	5.23077	#DIV/0!	#DIV/0!	#DIV/0!	Q14517	sp|Q14517|FAT1_HUMAN Protocadherin Fat 1 OS=Homo sapiens GN=FAT1 PE=1 SV=2	2e-05
KH.C1.602.v1.A.SL1-1	0	163	0	517	0	352	0	5.52258	0	13.5619	0	11.4731	#DIV/0!	#DIV/0!	#DIV/0!	O27266	sp|O27266|COFG_METTH FO synthase subunit 1 OS=Methanothermobacter thermautotrophicus (strain ATCC 29096 / DSM 1053 / JCM 10044 / NBRC 100330 / Delta H) GN=cofG PE=3 SV=2	0.98
KH.C10.150.v1.A.SL1-1	0	181	0	290	0	334	0	2.95155	0	3.66137	0	5.23965	#DIV/0!	#DIV/0!	#DIV/0!	P47239	sp|P47239|PAX7_MOUSE Paired box protein Pax-7 OS=Mus musculus GN=Pax7 PE=1 SV=2	4e-77
KH.C9.462.v4.A.SL2-1	0	292	0	564	0	258	0	1.5352	0	2.29581	0	1.30493	#DIV/0!	#DIV/0!	#DIV/0!	P04775	sp|P04775|SCN2A_RAT Sodium channel protein type 2 subunit alpha OS=Rattus norvegicus GN=Scn2a PE=1 SV=1	0
KH.C2.377.v1.A.SL2-1	0	128	0	393	0	243	0	3.91963	0	9.31756	0	7.15856	#DIV/0!	#DIV/0!	#DIV/0!	Q9ES87	sp|Q9ES87|PRSS8_RAT Prostasin OS=Rattus norvegicus GN=Prss8 PE=2 SV=3	6e-13
KH.C1.1093.v1.R.ND2-1	0	133	0	176	0	221	0	2.33901	0	2.39645	0	3.73902	#DIV/0!	#DIV/0!	#DIV/0!	FALSE	FALSE	FALSE
KH.C9.157.v2.R.ND1-1	0	122	0	290	0	195	0	5.52997	0	10.1774	0	8.5032	#DIV/0!	#DIV/0!	#DIV/0!	Q0C6A7	sp|Q0C6A7|Y002_HYPNA Maf-like protein HNE_0002 OS=Hyphomonas neptunium (strain ATCC 15444) GN=HNE_0002 PE=3 SV=1	0.014
KH.C2.655.v1.R.ND1-1	0	125	0	338	0	183	0	1.57734	0	3.30223	0	2.22153	#DIV/0!	#DIV/0!	#DIV/0!	FALSE	FALSE	FALSE
KH.C1.570.v1.A.nonSL2-1	1	938	0	108	0	3368	0.0236634	28.6361	0	2.55276	0	98.9162	1210.14	#DIV/0!	#DIV/0!	O15998	sp|O15998|ACTM_CIOSA Actin, muscle OS=Ciona savignyi PE=2 SV=1	0
KH.C9.717.v1.A.ND1-1	1	300	0	776	0	562	0.018141	7.02129	0	14.0615	0	12.6537	387.04	#DIV/0!	#DIV/0!	Q8JIT7	sp|Q8JIT7|FAST3_XENLA Forkhead activin signal transducer 3 OS=Xenopus laevis GN=fast3 PE=1 SV=1	1e-24
KH.C5.384.v1.B.SL2-1	1	283	0	746	0	353	0.00678753	2.47818	0	5.05778	0	2.97376	365.108	#DIV/0!	#DIV/0!	Q9D733	sp|Q9D733|GP2_MOUSE Pancreatic secretory granule membrane major glycoprotein GP2 OS=Mus musculus GN=Gp2 PE=2 SV=3	0.004
KH.C1.900.v1.A.ND1-1	1	192	0	264	0	203	0.0199574	4.94356	0	5.26281	0	5.02828	247.705	#DIV/0!	#DIV/0!	Q9NGQ2	sp|Q9NGQ2|KIF1_DICDI Kinesin-related protein 1 OS=Dictyostelium discoideum GN=kif1 PE=1 SV=1	5.5
KH.L22.12.v1.A.ND1-1	3	445	0	2990	0	254	0.0946055	18.1046	0	94.1836	0	9.9414	191.37	#DIV/0!	#DIV/0!	Q4KHH8	sp|Q4KHH8|GLND_PSEF5 [Protein-PII] uridylyltransferase OS=Pseudomonas fluorescens (strain Pf-5 / ATCC BAA-477) GN=glnD PE=3 SV=1	1.6
KH.C3.231.v1.A.SL1-1	2	293	0	526	0	842	0.0515222	9.73793	0	13.535	0	26.9213	189.004	#DIV/0!	#DIV/0!	0	0	0
KH.C12.417.v2.A.ND1-1	3	425	0	214	0	885	0.113757	20.7913	0	8.10552	0	41.6505	182.769	#DIV/0!	#DIV/0!	P02589	sp|P02589|TNNC2_RANES Troponin C, skeletal muscle OS=Rana esculenta PE=1 SV=1	2e-24
KH.C14.476.v1.A.ND1-1	3	294	0	914	0	757	0.0541073	6.84095	0	16.4661	0	16.9453	126.433	#DIV/0!	#DIV/0!	P03746	sp|P03746|VTTA_BPT7 Tail tubular protein A OS=Enterobacteria phage T7 GN=11 PE=1 SV=1	5.1
KH.L122.13.v1.A.SL1-1	5	135	0	302	0	538	0.11089	3.86271	0	6.69021	0	14.809	34.8336	#DIV/0!	#DIV/0!	Q3SZZ2	sp|Q3SZZ2|XBP1_BOVIN X-box-binding protein 1 OS=Bos taurus GN=XBP1 PE=2 SV=1	0.009
KH.C2.20.v1.A.ND1-1	1	557	2	3680	0	1500	0.0402768	28.9431	0.0793654	148.051	0	74.9834	718.604	1865.44	#DIV/0!	FALSE	FALSE	FALSE
KH.C4.714.v1.A.SL1-1	0	267	1	1624	0	888	0	16.2038	0.0463465	76.3072	0	51.8445	#DIV/0!	1646.45	#DIV/0!	FALSE	FALSE	FALSE
KH.L22.52.v1.A.ND1-1	8	895	5	7975	0	658	0.279808	40.3857	0.172301	278.618	0	28.5637	144.334	1617.05	#DIV/0!	B1YVA4	sp|B1YVA4|SYI_BURA4 Isoleucine--tRNA ligase OS=Burkholderia ambifaria (strain MC40-6) GN=ileS PE=3 SV=1	0.83
KH.C2.694.v1.A.SL1-1	0	685	1	1541	0	1289	0	18.5542	0.0206854	32.3168	0	33.5884	#DIV/0!	1562.3	#DIV/0!	Q862Z3	sp|Q862Z3|UROM_CANFA Uromodulin OS=Canis familiaris GN=UMOD PE=2 SV=1	0.0002
KH.C14.163.v1.A.nonSL2-1	7	597	2	2912	0	975	0.133041	14.6385	0.0374512	55.2827	0	22.9992	110.03	1476.13	#DIV/0!	A7H5G4	sp|A7H5G4|RF2_CAMJD Peptide chain release factor 2 OS=Campylobacter jejuni subsp. doylei (strain ATCC BAA-1458 / RM4099 / 269.97) GN=prfB PE=3 SV=1	0.25
KH.C13.16.v1.R.ND1-1	12	370	1	1140	0	1127	0.121737	4.84259	0.00999512	11.552	0	14.1901	39.7791	1155.76	#DIV/0!	Q5RBP8	sp|Q5RBP8|PROP_PONAB Properdin OS=Pongo abelii GN=CFP PE=2 SV=1	2e-05
KH.C7.154.v1.A.SL5-1	28	410	1	1011	0	591	0.620544	11.7228	0.0218354	22.3807	0	16.2563	18.8912	1024.98	#DIV/0!	O34886	sp|O34886|YTCB_BACSU Uncharacterized UDP-glucose epimerase YtcB OS=Bacillus subtilis (strain 168) GN=ytcB PE=3 SV=1	0.095
KH.C14.116.v1.A.ND1-1	0	764	1	831	0	145	0	17.7463	0.0177389	14.9448	0	3.24016	#DIV/0!	842.488	#DIV/0!	FALSE	FALSE	FALSE
KH.C9.616.v1.A.SL1-1	0	312	1	748	0	158	0	5.70199	0.0139567	10.584	0	2.77788	#DIV/0!	758.34	#DIV/0!	Q60564	sp|Q60564|LMX1B_MESAU LIM homeobox transcription factor 1-beta (Fragment) OS=Mesocricetus auratus GN=LMX1B PE=2 SV=1	5e-19
KH.L141.68.v1.A.nonSL1-1	0	540	1	658	0	766	0	21.363	0.0302121	20.1544	0	29.1529	#DIV/0!	667.096	#DIV/0!	FALSE	FALSE	FALSE
KH.C3.662.v2.B.ND2-2	5	806	2	1124	0	2351	0.182475	37.9491	0.0719132	40.9739	0	106.489	207.969	569.769	#DIV/0!	P96134	sp|P96134|OTC_THET2 Ornithine carbamoyltransferase OS=Thermus thermophilus (strain HB27 / ATCC BAA-163 / DSM 7039) GN=argF PE=1 SV=1	6.9
KH.C9.162.v1.B.ND1-1	1	167	2	1103	0	583	0.0133621	2.8789	0.0263301	14.7218	0	9.66859	215.452	559.124	#DIV/0!	O15539	sp|O15539|RGS5_HUMAN Regulator of G-protein signaling 5 OS=Homo sapiens GN=RGS5 PE=1 SV=1	5e-11
KH.C7.354.v1.A.nonSL1-1	1	422	2	1059	0	1005	0.0572628	31.1759	0.112836	60.5727	0	71.4261	544.436	536.82	#DIV/0!	O88799	sp|O88799|ZAN_MOUSE Zonadhesin OS=Mus musculus GN=Zan PE=2 SV=1	1.7
KH.C1.158.v1.A.ND2-1	6	297	1	443	0	154	0.0674239	4.3058	0.0110716	4.97251	0	2.14784	63.8616	449.124	#DIV/0!	P48506	sp|P48506|GSH1_HUMAN Glutamate--cysteine ligase catalytic subunit OS=Homo sapiens GN=GCLC PE=1 SV=2	1e-97
KH.C7.720.v2.C.SL2-1	1	394	1	431	0	367	0.0169448	8.61324	0.0166948	7.29495	0	7.71829	508.312	436.958	#DIV/0!	Q86UN3	sp|Q86UN3|R4RL2_HUMAN Reticulon-4 receptor-like 2 OS=Homo sapiens GN=RTN4RL2 PE=1 SV=1	3e-20
KH.C5.519.v1.A.SL1-1	0	271	2	842	0	458	0	7.83789	0.0441745	18.8546	0	12.7432	#DIV/0!	426.82	#DIV/0!	FALSE	FALSE	FALSE
KH.L116.100.v1.A.SL1-1	0	122	1	366	0	253	0	2.31944	0.014519	5.3874	0	4.62731	#DIV/0!	371.06	#DIV/0!	FALSE	FALSE	FALSE
KH.L5.14.v1.A.SL1-1	1	202	1	362	0	500	0.00989299	2.57818	0.00974707	3.57722	0	6.13927	260.607	367.004	#DIV/0!	A8Y1P7	sp|A8Y1P7|BRE4_CAEBR Beta-1,4-N-acetylgalactosaminyltransferase bre-4 OS=Caenorhabditis briggsae GN=bre-4 PE=3 SV=1	2e-32
KH.C1.1013.v1.A.ND1-1	0	404	1	329	0	634	0	22.509	0.0425487	14.192	0	33.9819	#DIV/0!	333.548	#DIV/0!	FALSE	FALSE	FALSE
KH.C7.784.v1.A.SL1-1	4	188	1	327	0	485	0.108529	6.58082	0.0267322	8.86225	0	16.3323	60.6362	331.52	#DIV/0!	Q7NAT4	sp|Q7NAT4|HMW1_MYCGA Cytadherence high molecular weight protein 1 OS=Mycoplasma gallisepticum (strain R(low / passage 15 / clone 2)) GN=hlp1 PE=3 SV=2	0.19
KH.C10.67.v1.B.SL1-1	2	270	1	297	0	632	0.0428878	7.46968	0.0211276	6.36164	0	16.8205	174.168	301.106	#DIV/0!	Q03938	sp|Q03938|ZNF90_HUMAN Zinc finger protein 90 OS=Homo sapiens GN=ZNF90 PE=2 SV=3	1.8
KH.C13.14.v1.R.ND1-1	2	114	1	294	0	158	0.0534256	3.92879	0.0263188	7.84468	0	5.23836	73.5376	298.064	#DIV/0!	P08133	sp|P08133|ANXA6_HUMAN Annexin A6 OS=Homo sapiens GN=ANXA6 PE=1 SV=3	3e-12
KH.C14.414.v2.B.ND1-1	2	298	3	801	0	539	0.0201384	3.8712	0.029762	8.05631	0	6.736	192.23	270.691	#DIV/0!	Q9PU85	sp|Q9PU85|PIM3_COTJA Serine/threonine-protein kinase pim-3 OS=Coturnix coturnix japonica GN=PIM3 PE=2 SV=1	8e-34
KH.L141.32.v1.A.SL1-1	10	402	4	1064	0	1824	0.119407	6.19286	0.0470584	12.6906	0	27.0318	51.8633	269.677	#DIV/0!	O15974	sp|O15974|OPSD2_MIZYE Rhodopsin, G0-coupled OS=Mizuhopecten yessoensis GN=SCOP2 PE=1 SV=1	0.014
KH.C4.403.v1.A.SL1-1	3	289	1	239	0	230	0.0673509	8.37056	0.0221192	5.35956	0	6.40869	124.283	242.304	#DIV/0!	Q8BQ86	sp|Q8BQ86|CHST8_MOUSE Carbohydrate sulfotransferase 8 OS=Mus musculus GN=Chst8 PE=2 SV=1	0.009
KH.C8.117.v1.A.SL1-1	8	117	1	228	0	448	0.0648122	1.22289	0.00798203	1.84506	0	4.50468	18.8682	231.152	#DIV/0!	A2ANX9	sp|A2ANX9|ZN711_MOUSE Zinc finger protein 711 OS=Mus musculus GN=Znf711 PE=3 SV=1	2.9
KH.C7.58.v2.C.SL2-1	8	141	2	444	0	650	0.0653057	1.48496	0.0160856	3.62037	0	6.58557	22.7386	225.069	#DIV/0!	Q5K2P9	sp|Q5K2P9|POLS2_RAT Polyserase-2 OS=Rattus norvegicus GN=Prss36 PE=2 SV=1	0.0009
KH.C11.711.v1.A.ND1-1	2	238	2	444	0	403	0.0293752	4.50985	0.0289419	6.51393	0	7.34641	153.526	225.069	#DIV/0!	O88799	sp|O88799|ZAN_MOUSE Zonadhesin OS=Mus musculus GN=Zan PE=2 SV=1	0.02
KH.C7.391.v1.A.SL2-1	2	2406	7	1446	0	694	0.0486219	75.4626	0.167666	35.1139	0	20.9402	1552.03	209.427	#DIV/0!	0	0	0
KH.L132.17.v1.A.SL1-1	0	122	1	176	0	212	0	3.19453	0.0199968	3.56808	0	5.34033	#DIV/0!	178.433	#DIV/0!	Q9IA14	sp|Q9IA14|HXD10_HETFR Homeobox protein Hox-D10 OS=Heterodontus francisci GN=HOXD10 PE=3 SV=1	4e-21
KH.C9.501.v1.A.ND2-1	2	106	2	308	0	232	0.0409936	2.80302	0.040389	6.30589	0	5.90192	68.377	156.129	#DIV/0!	A6SVJ9	sp|A6SVJ9|PYRF_JANMA Orotidine 5'-phosphate decarboxylase OS=Janthinobacterium sp. (strain Marseille) GN=pyrF PE=3 SV=1	4.9
KH.L171.19.v1.A.ND1-1	4	271	5	708	0	368	0.0705472	6.16628	0.0868833	12.4727	0	8.05539	87.4065	143.557	#DIV/0!	Q4WVH4	sp|Q4WVH4|DOT1_ASPFU Histone-lysine N-methyltransferase, H3 lysine-79 specific OS=Neosartorya fumigata (strain ATCC MYA-4609 / Af293 / CBS 101355 / FGSC A1100) GN=dot1 PE=3 SV=1	1.3
KH.C1.99.v1.A.SL1-1	5	133	2	274	0	249	0.0606351	2.08085	0.0238963	3.31905	0	3.74776	34.3175	138.894	#DIV/0!	Q6P0E1	sp|Q6P0E1|SOX2_DANRE Transcription factor Sox-2 OS=Danio rerio GN=sox2 PE=2 SV=1	2e-32
KH.C10.27.v2.A.SL1-1	0	173	1	103	0	167	0	6.90536	0.0304826	3.18311	0	6.41271	#DIV/0!	104.424	#DIV/0!	G7H7V7	sp|G7H7V7|TOPZ1_BOVIN Testis- and ovary-specific PAZ domain-containing protein 1 OS=Bos taurus GN=TOPAZ1 PE=2 SV=1	0.062
KH.C5.83.v1.A.SL1-1	3	164	3	308	0	436	0.067157	4.7364	0.0661664	6.88699	0	12.1137	70.5273	104.086	#DIV/0!	FALSE	FALSE	FALSE
KH.C1.747.v1.A.SL1-1	42	220	5	477	0	660	0.549867	3.71591	0.0644948	6.23786	0	10.7244	6.75784	96.7188	#DIV/0!	Q28ES4	sp|Q28ES4|S22FL_XENTR Solute carrier family 22 member 15-like OS=Xenopus tropicalis GN=slc22a15b PE=2 SV=1	2e-06
KH.C12.63.v1.A.SL3-1	0	106	2	184	0	188	0	2.78467	0.0401245	3.74248	0	4.75127	#DIV/0!	93.2718	#DIV/0!	Q5F349	sp|Q5F349|SG196_CHICK Protein O-mannose kinase OS=Gallus gallus GN=POMK PE=2 SV=1	3e-09
KH.C2.380.v1.A.SL2-1	2	231	5	419	0	220	0.023058	3.43588	0.0567947	4.82519	0	3.14798	149.01	84.9584	#DIV/0!	FALSE	FALSE	FALSE
KH.C7.559.v1.A.SL1-1	8	152	5	417	0	893	0.0962653	2.3597	0.0592783	5.01216	0	13.3367	24.5125	84.5529	#DIV/0!	Q5K2P9	sp|Q5K2P9|POLS2_RAT Polyserase-2 OS=Rattus norvegicus GN=Prss36 PE=2 SV=1	2e-10
KH.C11.196.v1.A.SL1-1	0	280	5	396	0	469	0	6.26796	0.0854772	6.86338	0	10.1001	#DIV/0!	80.2948	#DIV/0!	Q9BRS8	sp|Q9BRS8|LARP6_HUMAN La-related protein 6 OS=Homo sapiens GN=LARP6 PE=1 SV=1	4e-07
KH.S390.3.v1.A.SL1-1	2	140	5	387	0	678	0.0465823	4.20681	0.114738	9.00349	0	19.5992	90.3093	78.47	#DIV/0!	Q6DC02	sp|Q6DC02|KCD15_DANRE BTB/POZ domain-containing protein kctd15 OS=Danio rerio GN=kctd15 PE=1 SV=1	2e-48
KH.C2.205.v1.A.SL3-1	25	141	6	442	0	163	0.45168	3.28658	0.106804	7.97668	0	3.65509	7.27635	74.685	#DIV/0!	P27121	sp|P27121|DCOR_NEUCR Ornithine decarboxylase OS=Neurospora crassa (strain ATCC 24698 / 74-OR23-1A / CBS 708.71 / DSM 1257 / FGSC 987) GN=spe-1 PE=2 SV=1	3e-31
KH.C8.844.v1.A.SL2-1	1	267	8	582	0	548	0.0110614	3.81028	0.0871862	6.43048	0	7.52334	344.465	73.7557	#DIV/0!	Q6ZR08	sp|Q6ZR08|DYH12_HUMAN Dynein heavy chain 12, axonemal OS=Homo sapiens GN=DNAH12 PE=2 SV=2	0.75
KH.L157.2.v2.A.ND1-1	2	103	6	367	0	244	0.0452601	3.00716	0.133777	8.29584	0	6.85321	66.4418	62.0122	#DIV/0!	O60218	sp|O60218|AK1BA_HUMAN Aldo-keto reductase family 1 member B10 OS=Homo sapiens GN=AKR1B10 PE=1 SV=2	1e-40
KH.C1.20.v3.A.nonSL1-1	1	550	3	182	0	3109	0.0419052	29.7348	0.123861	7.61813	0	161.699	709.573	61.5053	#DIV/0!	A0JNJ5	sp|A0JNJ5|MYL1_BOVIN Myosin light chain 1/3, skeletal muscle isoform OS=Bos taurus GN=MYL1 PE=2 SV=1	5e-25
KH.C3.503.v2.A.ND1-1	11	285	10	534	0	294	0.115317	3.85461	0.103287	5.59179	0	3.82531	33.4262	54.1382	#DIV/0!	Q9QXS1	sp|Q9QXS1|PLEC_MOUSE Plectin OS=Mus musculus GN=Plec PE=1 SV=2	1e-38
KH.C9.785.v2.A.SL1-1	8	307	8	350	0	1338	0.120752	5.9783	0.118971	5.27694	0	25.0657	49.5088	44.3548	#DIV/0!	P02543	sp|P02543|VIME_PIG Vimentin OS=Sus scrofa GN=VIM PE=1 SV=2	4e-45
KH.C8.309.v1.A.nonSL1-1	10	2030	5	183	0	5388	0.393591	103.08	0.193893	7.19457	0	263.203	261.897	37.1059	#DIV/0!	P41691	sp|P41691|MYL5_FELCA Myosin light chain 5 OS=Felis catus GN=MYL5 PE=2 SV=2	5e-37
KH.C10.417.v1.A.SL1-1	5	111	5	162	0	382	0.0529885	1.51764	0.052207	1.71489	0	5.02451	28.6409	32.8479	#DIV/0!	Q00223	sp|Q00223|XP4_XENLA Putative gastrointestinal growth factor xP4 OS=Xenopus laevis GN=p4 PE=2 SV=1	0.0002
KH.C7.670.v1.C.SL2-1	20	207	11	327	0	694	0.405393	5.41317	0.219678	6.62069	0	17.4592	13.3529	30.1382	#DIV/0!	P09678	sp|P09678|SODC_BRAOC Superoxide dismutase [Cu-Zn] OS=Brassica oleracea var. capitata GN=SODCC PE=1 SV=2	0.012
KH.C1.93.v1.A.SL2-1	2	190	9	222	0	414	0.0203028	2.48836	0.0900148	2.25106	0	5.21608	122.563	25.0077	#DIV/0!	O48766	sp|O48766|GUN11_ARATH Endoglucanase 11 OS=Arabidopsis thaliana GN=At2g32990 PE=2 SV=1	1e-39
KH.C1.731.v1.A.SL1-1	0	162	5	105	0	180	0	2.38657	0.0562524	1.19763	0	2.55103	#DIV/0!	21.2903	#DIV/0!	Q9JMI0	sp|Q9JMI0|ECEL1_MOUSE Endothelin-converting enzyme-like 1 OS=Mus musculus GN=Ecel1 PE=2 SV=2	2e-32
KH.C13.105.v3.A.ND2-1	10	255	18	366	0	207	0.104869	3.45002	0.18598	3.83387	0	2.69424	32.8984	20.6144	#DIV/0!	O75038	sp|O75038|PLCH2_HUMAN 1-phosphatidylinositol 4,5-bisphosphate phosphodiesterase eta-2 OS=Homo sapiens GN=PLCH2 PE=2 SV=3	4e-56
KH.L63.13.v1.A.SL1-1	20	190	17	340	0	319	0.669401	8.20435	0.560598	11.367	0	13.2515	12.2563	20.2765	#DIV/0!	Q561R0	sp|Q561R0|MZB1_RAT Marginal zone B- and B1-cell-specific protein OS=Rattus norvegicus GN=Mzb1 PE=2 SV=1	4e-06
KH.C12.394.v1.A.SL1-1	2	211	9	149	0	354	0.0718099	9.77397	0.318378	5.34379	0	15.7753	136.109	16.7844	#DIV/0!	Q898R2	sp|Q898R2|TPIS_CLOTE Triosephosphate isomerase OS=Clostridium tetani (strain Massachusetts / E88) GN=tpiA PE=3 SV=1	1.7
KH.C8.859.v1.A.nonSL1-1	8	2673	9	111	0	5776	0.259926	112.045	0.288104	3.6024	0	232.92	431.066	12.5038	#DIV/0!	Q02045	sp|Q02045|MYL5_HUMAN Myosin light chain 5 OS=Homo sapiens GN=MYL5 PE=2 SV=1	3e-39
KH.C4.73.v2.A.nonSL1-1	3	1483	12	1559	1	7532	0.0587042	37.439	0.231353	30.4722	0.0195832	182.927	637.756	131.713	9341.01	A8TX70	sp|A8TX70|CO6A5_HUMAN Collagen alpha-5(VI) chain OS=Homo sapiens GN=COL6A5 PE=1 SV=1	0.16
KH.C9.147.v1.A.nonSL1-1	13	14608	59	20880	2	13596	0.182244	264.202	0.814909	292.382	0.0280592	236.56	1449.71	358.791	8430.72	Q9BYR4	sp|Q9BYR4|KRA43_HUMAN Keratin-associated protein 4-3 OS=Homo sapiens GN=KRTAP4-3 PE=2 SV=2	0.89
KH.C1.1186.v1.A.nonSL1-1	2	833	5	486	1	4796	0.083473	44.8534	0.205604	20.261	0.0417687	248.436	537.34	98.5437	5947.88	A0JNJ5	sp|A0JNJ5|MYL1_BOVIN Myosin light chain 1/3, skeletal muscle isoform OS=Bos taurus GN=MYL1 PE=2 SV=1	2e-24
KH.C1.181.v1.A.SL1-1	0	764	5	1263	1	2422	0	18.5295	0.092609	23.7164	0.0188136	56.5105	#DIV/0!	256.092	3003.71	FALSE	FALSE	FALSE
KH.S1641.1.v1.A.ND1-1	20	15252	64	59367	9	19447	1.17335	1154.4	3.69933	3478.97	0.528414	1416.01	983.855	940.432	2679.74	0	0	0
KH.C3.251.v1.A.SL1-1	5	1419	5	1615	1	2052	0.129665	47.4755	0.127752	41.8345	0.025953	66.0464	366.14	327.465	2544.84	Q0WYX8	sp|Q0WYX8|MDGA1_CHICK MAM domain-containing glycosylphosphatidylinositol anchor protein 1 OS=Gallus gallus GN=MDGA1 PE=1 SV=1	0.028
KH.S345.1.v1.C.nonSL2-1	7	3455	18	10981	2	4000	0.186829	118.968	0.473331	292.75	0.053421	132.503	636.773	618.489	2480.35	0	0	0
KH.C11.673.v1.A.SL1-1	10	2180	10	421	3	5475	0.328339	92.3449	0.323496	13.8074	0.0985777	223.113	281.249	42.682	2263.32	P68247	sp|P68247|TNNI2_COTJA Troponin I, fast skeletal muscle OS=Coturnix coturnix japonica GN=TNNI2 PE=3 SV=2	4e-28
KH.C8.121.v5.A.SL2-1	7	2925	11	5316	6	10390	0.0406681	21.9238	0.0629644	30.8496	0.0348853	74.9187	539.091	489.953	2147.57	P98167	sp|P98167|SSPO_BOVIN SCO-spondin OS=Bos taurus GN=SSPO PE=2 SV=2	6e-13
KH.C1.188.v1.A.SL1-1	23	10928	39	13416	13	20055	0.273377	167.575	0.456715	159.282	0.154637	295.853	612.981	348.755	1913.21	P01359	sp|P01359|TFF2_PIG Trefoil factor 2 (Fragment) OS=Sus scrofa GN=TFF2 PE=1 SV=4	1.6
KH.L132.4.v1.A.ND1-1	6	1553	6	1966	2	3047	0.105402	35.1969	0.103848	34.4978	0.0351612	66.4339	333.929	332.196	1889.41	Q9TV36	sp|Q9TV36|FBN1_PIG Fibrillin-1 OS=Sus scrofa GN=FBN1 PE=2 SV=1	2e-23
KH.S1440.1.v1.A.nonSL1-1	1	362	0	127	1	1509	0.0247561	11.5618	0	3.14047	0.0247752	46.365	467.028	#DIV/0!	1871.43	O15998	sp|O15998|ACTM_CIOSA Actin, muscle OS=Ciona savignyi PE=2 SV=1	0
KH.S1366.1.v1.B.ND1-1	19	14841	93	55785	12	17962	0.746877	752.65	3.60184	2190.39	0.472076	876.333	1007.73	608.131	1856.34	Q7T292	sp|Q7T292|MFRN2_DANRE Mitoferrin-2 OS=Danio rerio GN=slc25a28 PE=2 SV=1	0.15
KH.C4.343.v1.A.nonSL1-1	6	1560	5	154	3	4392	0.136376	45.7451	0.11197	3.49636	0.0682406	123.899	335.435	31.2258	1815.62	O15998	sp|O15998|ACTM_CIOSA Actin, muscle OS=Ciona savignyi PE=2 SV=1	1e-162
KH.C2.594.v1.A.ND2-1	1	3065	12	5771	3	4361	0.0298118	117.883	0.352465	171.849	0.0895044	161.359	3954.26	487.565	1802.8	Q9SE95	sp|Q9SE95|FIP2_ARATH FH protein interacting protein FIP2 OS=Arabidopsis thaliana GN=FIP2 PE=1 SV=1	0.38
KH.C3.814.v1.C.nonSL1-1	14	3926	13	3145	5	7122	0.448313	162.195	0.41015	100.596	0.160235	283.057	361.79	245.267	1766.51	FALSE	FALSE	FALSE
KH.C1.611.v1.A.nonSL1-1	4	931	3	2695	2	2565	0.0855986	25.7034	0.063252	57.6069	0.0428324	68.126	300.278	910.752	1590.53	P23591	sp|P23591|FCL_MOUSE GDP-L-fucose synthase OS=Mus musculus GN=Tsta3 PE=2 SV=3	4e-92
KH.L18.43.v1.A.ND1-1	12	467	3	3161	2	2396	0.070255	3.52734	0.0173047	18.4854	0.0117182	17.4101	50.2077	1068.23	1485.73	O55225	sp|O55225|OTOG_MOUSE Otogelin OS=Mus musculus GN=Otog PE=1 SV=2	9e-06
KH.C1.525.v1.A.ND1-1	1	742	4	1243	2	2266	0.0424777	40.663	0.167405	52.7401	0.085021	119.465	957.278	315.046	1405.12	Q5L661	sp|Q5L661|SYY_CHLAB Tyrosine--tRNA ligase OS=Chlamydophila abortus (strain DSM 27085 / S26/3) GN=tyrS PE=3 SV=1	3.3
KH.L96.44.v1.A.ND1-1	1	605	4	6117	6	6400	0.0412383	32.1877	0.16252	251.97	0.247621	327.567	780.53	1550.39	1322.85	FALSE	FALSE	FALSE
KH.C5.596.v1.A.SL1-1	0	592	2	1079	1	1041	0	13.0269	0.0336095	18.383	0.0170695	22.0371	#DIV/0!	546.958	1291.02	D1MGU0	sp|D1MGU0|SLA_PROJR Snaclec jerdonibitin subunit alpha OS=Protobothrops jerdonii PE=1 SV=1	0.025
KH.C6.12.v2.A.nonSL1-1	3	530	3	944	1	1037	0.0433664	9.88421	0.0427267	13.6305	0.0144666	18.605	227.923	319.017	1286.06	P35441	sp|P35441|TSP1_MOUSE Thrombospondin-1 OS=Mus musculus GN=Thbs1 PE=1 SV=1	0.4
KH.C3.781.v1.A.SL1-2	10	839	6	1518	2	2054	0.186637	20.202	0.11033	28.2994	0.0373562	47.5791	108.242	256.497	1273.66	P48616	sp|P48616|VIME_BOVIN Vimentin OS=Bos taurus GN=VIM PE=1 SV=3	3e-26
KH.L146.5.v1.C.ND1-1	7	2019	6	7520	3	3024	0.718336	267.301	0.606635	770.826	0.308096	385.15	372.111	1270.66	1250.1	Q5F3Z9	sp|Q5F3Z9|ZC3HE_CHICK Zinc finger CCCH domain-containing protein 14 OS=Gallus gallus GN=ZC3H14 PE=2 SV=1	1.9
KH.C10.144.v1.A.SL3-1	6	690	6	1121	2	1809	0.0832495	12.3513	0.0820215	15.5362	0.0277713	31.1521	148.365	189.416	1121.74	A8YXX7	sp|A8YXX7|TFF3_BOVIN Trefoil factor 3 OS=Bos taurus GN=TFF3 PE=3 SV=1	4e-11
KH.C3.661.v1.C.ND1-1	12	953	16	741	3	2612	0.376893	38.6157	0.495112	23.2468	0.0942961	101.819	102.458	46.9527	1079.78	P13105	sp|P13105|TPM1_RANTE Tropomyosin alpha-1 chain OS=Rana temporaria GN=tpm1 PE=2 SV=1	1e-27
KH.C11.539.v1.A.SL1-1	2	220	0	507	1	866	0.0294308	4.17667	0	7.45228	0.0147268	15.8165	141.915	#DIV/0!	1073.99	Q28E01	sp|Q28E01|S20A2_XENTR Sodium-dependent phosphate transporter 2 OS=Xenopus tropicalis GN=slc20a2 PE=2 SV=1	5e-85
KH.L132.16.v1.A.SL1-1	123	42217	194	53768	112	95118	0.5847	258.911	0.908607	255.306	0.532821	561.189	442.809	280.986	1053.24	O00339	sp|O00339|MATN2_HUMAN Matrilin-2 OS=Homo sapiens GN=MATN2 PE=1 SV=4	2e-30
KH.C6.197.v1.A.ND1-1	25	1421	19	8743	11	8821	0.286314	20.9957	0.214389	100.016	0.126075	125.383	73.3311	466.519	994.508	Q3UHD1	sp|Q3UHD1|BAI1_MOUSE Brain-specific angiogenesis inhibitor 1 OS=Mus musculus GN=Bai1 PE=1 SV=1	9e-09
KH.C7.164.v1.C.ND4-1	19	1191	13	1653	4	2852	0.20751	16.7815	0.139886	18.0329	0.04372	38.6592	80.871	128.912	884.246	Q4LDE5	sp|Q4LDE5|SVEP1_HUMAN Sushi, von Willebrand factor type A, EGF and pentraxin domain-containing protein 1 OS=Homo sapiens GN=SVEP1 PE=1 SV=3	6e-09
KH.L171.4.v1.A.SL1-1	0	172	0	213	1	632	0	2.65376	0	2.54441	0.0119683	9.38069	#DIV/0!	#DIV/0!	783.791	FALSE	FALSE	FALSE
KH.C14.535.v1.A.SL1-1	0	937	2	1773	3	1860	0	40.6354	0.0662379	59.5317	0.100922	77.6001	#DIV/0!	898.755	768.909	Q3LSN4	sp|Q3LSN4|LIAS1_PEA Lipoyl synthase 1, mitochondrial OS=Pisum sativum GN=LIP1-1 PE=2 SV=1	2.6
KH.C11.184.v1.A.nonSL2-1	1	193	7	622	1	607	0.0210519	5.24183	0.14519	13.0795	0.0210682	15.8599	248.996	90.0855	752.787	Q9W0P5	sp|Q9W0P5|GALE_DROME Probable UDP-glucose 4-epimerase OS=Drosophila melanogaster GN=Gale PE=2 SV=1	2e-51
KH.C10.220.v1.A.SL1-1	2	275	1	378	1	587	0.123388	21.8881	0.0607838	23.2939	0.0617415	44.9468	177.393	383.225	727.983	Q8ZYE0	sp|Q8ZYE0|KPYK_PYRAE Pyruvate kinase OS=Pyrobaculum aerophilum (strain ATCC 51768 / IM2 / DSM 7523 / JCM 9630 / NBRC 100827) GN=pyk PE=1 SV=1	1.1
KH.C11.99.v1.A.SL2-1	2	939	8	139	6	3418	0.0196547	11.9052	0.077459	1.36446	0.0590096	41.6895	605.717	17.6152	706.487	Q8R429	sp|Q8R429|AT2A1_MOUSE Sarcoplasmic/endoplasmic reticulum calcium ATPase 1 OS=Mus musculus GN=Atp2a1 PE=2 SV=1	0
KH.S511.1.v1.C.ND1-1	1	871	5	4033	2	997	0.0698734	78.5172	0.344214	281.481	0.139855	86.4622	1123.71	817.75	618.228	Q9LUM0	sp|Q9LUM0|FAB1B_ARATH 1-phosphatidylinositol-3-phosphate 5-kinase FAB1B OS=Arabidopsis thaliana GN=FAB1B PE=2 SV=1	3.1
KH.C4.71.v1.A.SL1-1	17	274	12	484	1	471	0.284802	5.92215	0.198071	8.09932	0.016766	9.79341	20.7939	40.8909	584.123	O35310	sp|O35310|HS3S1_MOUSE Heparan sulfate glucosamine 3-O-sulfotransferase 1 OS=Mus musculus GN=Hs3st1 PE=1 SV=1	7e-06
KH.C8.603.v1.A.nonSL1-1	1	202	2	1112	2	936	0.0118497	3.08812	0.0233499	13.162	0.0237178	13.7658	260.607	563.686	580.402	Q11067	sp|Q11067|PDIA6_CAEEL Probable protein disulfide-isomerase A6 OS=Caenorhabditis elegans GN=tag-320 PE=3 SV=1	1.1
KH.S423.6.v1.A.SL1-1	1	156	0	186	1	408	0.0148916	2.9971	0	2.76671	0.0149031	7.54085	201.261	#DIV/0!	505.992	P97443	sp|P97443|SMYD1_MOUSE Histone-lysine N-methyltransferase Smyd1 OS=Mus musculus GN=Smyd1 PE=1 SV=3	8e-20
KH.C1.943.v1.A.ND1-1	18	135	16	351	1	380	0.0411111	0.397791	0.0360042	0.80076	0.00228571	1.07718	9.676	22.2408	471.267	O88799	sp|O88799|ZAN_MOUSE Zonadhesin OS=Mus musculus GN=Zan PE=2 SV=1	0.59
KH.C9.872.v1.A.SL1-1	1	123	0	302	1	350	0.0111447	1.76851	0	3.36189	0.0111533	4.84122	158.686	#DIV/0!	434.062	Q99NA2	sp|Q99NA2|ATOH8_MOUSE Protein atonal homolog 8 OS=Mus musculus GN=Atoh8 PE=2 SV=1	8e-15
KH.C1.467.v1.A.SL1-1	4	143	0	136	1	325	0.0637819	2.94176	0	2.16613	0.0159578	6.43191	46.1222	#DIV/0!	403.057	P79350	sp|P79350|OPRM_BOVIN Mu-type opioid receptor OS=Bos taurus GN=OPRM1 PE=2 SV=2	3e-12
KH.C8.877.v1.A.SL1-1	9	229	9	575	2	645	0.135452	4.44643	0.133454	8.64407	0.0301236	12.0481	32.8267	64.7721	399.957	Q3SZZ2	sp|Q3SZZ2|XBP1_BOVIN X-box-binding protein 1 OS=Bos taurus GN=XBP1 PE=2 SV=1	5e-08
KH.C4.146.v1.A.SL1-1	3	150	1	426	2	619	0.0351606	2.26809	0.0115473	4.98716	0.0234585	9.00418	64.5066	431.889	383.834	FALSE	FALSE	FALSE
KH.C3.70.v1.C.SL1-1	3	106	1	177	1	304	0.0533644	2.4326	0.0175258	3.14494	0.0178019	6.71155	45.5847	179.447	377.014	Q19673	sp|Q19673|TYR3_CAEEL Putative tyrosinase-like protein tyr-3 OS=Caenorhabditis elegans GN=tyr-3 PE=3 SV=5	0.002
KH.L96.103.v1.A.SL1-1	75	193	11	249	1	301	1.44936	4.8118	0.209438	4.80645	0.0193398	7.2194	3.31994	22.9493	373.293	C3N749	sp|C3N749|RUBPS_SULIY Putative ribose 1,5-bisphosphate isomerase OS=Sulfolobus islandicus (strain Y.G.57.14 / Yellowstone #1) GN=YG5714_1786 PE=3 SV=1	0.37
KH.L4.43.v3.A.SL1-1	3	175	1	263	3	878	0.0698734	5.25852	0.0229476	6.11865	0.0699274	25.3807	75.2577	266.636	362.958	Q07E26	sp|Q07E26|CAV2_MUSPF Caveolin-2 OS=Mustela putorius furo GN=CAV2 PE=3 SV=1	3e-08
KH.L12.5.v1.A.SL1-1	40	10279	44	6120	19	5029	0.518877	172.024	0.562345	79.2984	0.246657	80.9663	331.532	141.014	328.255	Q01102	sp|Q01102|LYAM3_MOUSE P-selectin OS=Mus musculus GN=Selp PE=1 SV=1	4e-10
KH.C7.205.v1.A.SL1-1	4	120	7	237	5	1237	0.0589733	2.2825	0.101681	3.49022	0.0737736	22.6352	38.704	34.3252	306.82	Q3SX45	sp|Q3SX45|ASB2_BOVIN Ankyrin repeat and SOCS box protein 2 OS=Bos taurus GN=ASB2 PE=2 SV=1	2e-34
KH.C11.734.v1.A.ND1-1	6	291	5	610	3	734	0.0875057	5.47535	0.0718458	8.88635	0.0437866	13.2862	62.5714	123.686	303.43	Q9NY15	sp|Q9NY15|STAB1_HUMAN Stabilin-1 OS=Homo sapiens GN=STAB1 PE=1 SV=3	0.0002
KH.C14.293.v1.B.SL2-1	11	659	17	1643	10	2418	0.0951141	7.35144	0.144826	14.1905	0.0865342	25.9494	77.2907	97.9831	299.875	P98110	sp|P98110|LYAM2_PIG E-selectin OS=Sus scrofa GN=SELE PE=2 SV=1	0.0006
KH.L22.56.v2.A.ND1-1	3	148	4	646	1	236	0.0481078	3.0619	0.0631976	10.3475	0.0160483	4.69705	63.6465	163.733	292.682	Q9CPP7	sp|Q9CPP7|LIPG_MOUSE Gastric triacylglycerol lipase OS=Mus musculus GN=Lipf PE=2 SV=1	7.3
KH.C11.454.v1.A.nonSL1-1	49	5119	30	8245	51	11810	1.96339	264.624	1.18434	329.997	2.04511	587.326	134.779	278.633	287.186	Q47NK0	sp|Q47NK0|SYV_THEFY Valine--tRNA ligase OS=Thermobifida fusca (strain YX) GN=valS PE=3 SV=1	0.16
KH.C11.715.v1.A.ND1-1	7	200	14	637	2	422	0.121663	4.48462	0.239738	11.0589	0.0347878	9.10318	36.8609	46.129	261.677	Q9GZU5	sp|Q9GZU5|NYX_HUMAN Nyctalopin OS=Homo sapiens GN=NYX PE=1 SV=1	1e-14
KH.C2.48.v1.A.SL2-1	3	117	1	176	1	205	0.0659696	3.31927	0.0216655	3.86584	0.0220069	5.59494	50.3152	178.433	254.236	P11623	sp|P11623|RDRP_PLRVW Protein P1-P2 OS=Potato leafroll virus (strain Potato/Netherlands/Wageningen/1989) GN=ORF1/ORF2 PE=4 SV=2	0.35
KH.C2.514.v1.A.ND1-1	0	250	0	298	2	382	0	3.62048	0	3.34132	0.0224677	5.322	#DIV/0!	#DIV/0!	236.874	P97675	sp|P97675|ENPP3_RAT Ectonucleotide pyrophosphatase/phosphodiesterase family member 3 OS=Rattus norvegicus GN=Enpp3 PE=1 SV=2	7e-74
KH.L10.9.v1.A.SL2-1	25	112	7	271	3	566	0.226696	1.31026	0.0625387	2.45461	0.0272246	6.37001	5.77979	39.2495	233.98	Q03376	sp|Q03376|BAR3_CHITE Balbiani ring protein 3 OS=Chironomus tentans GN=BR3 PE=2 SV=1	0.091
KH.L37.12.v3.A.SL1-1	0	143	1	165	1	187	0	3.65146	0.0195003	3.26204	0.0198076	4.59363	#DIV/0!	167.281	231.913	FALSE	FALSE	FALSE
KH.C7.729.v1.A.ND1-1	11	317	13	277	16	2987	0.102928	3.8268	0.119848	2.58899	0.149829	34.6893	37.1793	21.6022	231.525	Q61555	sp|Q61555|FBN2_MOUSE Fibrillin-2 OS=Mus musculus GN=Fbn2 PE=1 SV=2	5e-13
KH.C2.910.v1.A.SL3-1	1	106	1	199	1	159	0.0347028	4.74574	0.0341909	6.89805	0.0347296	6.84826	136.754	201.751	197.188	Q057M1	sp|Q057M1|RSMC_BUCCC Ribosomal RNA small subunit methyltransferase C OS=Buchnera aphidicola subsp. Cinara cedri (strain Cc) GN=rsmC PE=3 SV=1	1.5
KH.C5.147.v3.B.SL2-1	16	114	18	222	1	159	0.0720386	0.662193	0.0798481	0.998406	0.00450589	0.888508	9.1922	12.5038	197.188	Q13402	sp|Q13402|MYO7A_HUMAN Unconventional myosin-VIIa OS=Homo sapiens GN=MYO7A PE=1 SV=2	0
KH.L116.2.v1.A.SL1-1	6	247	15	914	6	951	0.102676	5.45316	0.252904	15.6233	0.102755	20.1984	53.1105	61.7757	196.568	P33730	sp|P33730|LYAM2_CANFA E-selectin OS=Canis familiaris GN=SELE PE=2 SV=1	2e-07
KH.C2.995.v1.A.SL1-1	19	187	14	439	15	2223	0.0978761	1.24279	0.0710554	2.2589	0.0773303	14.2128	12.6976	31.7906	183.794	P13535	sp|P13535|MYH8_HUMAN Myosin-8 OS=Homo sapiens GN=MYH8 PE=1 SV=3	0
KH.S1155.2.v1.A.ND1-1	105	866	103	1969	6	868	1.32501	14.0988	1.2806	24.8191	0.0757736	13.5947	10.6405	19.3808	179.412	Q6Z5P2	sp|Q6Z5P2|GUN7_ORYSJ Endoglucanase 7 OS=Oryza sativa subsp. japonica GN=GLU10 PE=2 SV=1	5e-41
KH.L24.11.v1.A.SL1-1	12	104	102	347	1	138	0.0923346	1.03241	0.773268	2.66699	0.0077005	1.3179	11.1812	3.44899	171.144	P48058	sp|P48058|GRIA4_HUMAN Glutamate receptor 4 OS=Homo sapiens GN=GRIA4 PE=2 SV=2	6e-10
KH.C12.650.v1.A.SL1-1	6	561	5	990	11	1499	0.0929094	11.2074	0.0762825	15.3127	0.170466	28.809	120.627	200.737	169.002	O75445	sp|O75445|USH2A_HUMAN Usherin OS=Homo sapiens GN=USH2A PE=1 SV=3	0.097
KH.C2.889.v1.A.SL1-1	4	199	1	223	1	132	0.0709901	4.55644	0.0174858	3.95323	0.0177612	2.90757	64.1841	226.083	163.703	Q3ULM6	sp|Q3ULM6|USPL1_MOUSE SUMO-specific isopeptidase USPL1 OS=Mus musculus GN=Uspl1 PE=2 SV=2	0.87
KH.C14.201.v2.A.SL2-2	11	868	14	1005	8	1043	0.111302	11.3309	0.139567	10.1574	0.0810093	13.0982	101.803	72.7781	161.688	Q95209	sp|Q95209|SORL_RABIT Sortilin-related receptor OS=Oryctolagus cuniculus GN=SORL1 PE=2 SV=1	1e-05
KH.C11.293.v1.B.ND1-1	36	1062	106	3602	19	2448	0.304095	11.5735	0.882183	30.392	0.160618	25.6647	38.0589	34.4509	159.787	Q8N7Z2	sp|Q8N7Z2|GG6L1_HUMAN Golgin subfamily A member 6-like protein 1 OS=Homo sapiens GN=GOLGA6L1 PE=2 SV=2	3e-05
KH.C9.886.v1.B.SL1-1	27	218	6	870	6	754	0.514102	5.35521	0.11256	16.5468	0.114333	17.8187	10.4166	147.004	155.849	P52375	sp|P52375|HEPA_HHV6U DNA helicase/primase complex-associated protein OS=Human herpesvirus 6A (strain Uganda-1102) GN=U74 PE=3 SV=1	2.1
KH.C5.37.v2.A.SL2-1	1	164	2	376	4	472	0.00968047	2.04821	0.0190754	3.63574	0.0387518	5.67097	211.582	190.599	146.341	O89026	sp|O89026|ROBO1_MOUSE Roundabout homolog 1 OS=Mus musculus GN=Robo1 PE=1 SV=1	3.8
KH.L164.4.v2.A.ND2-2	35	375	26	1095	14	1639	0.941418	13.0131	0.689023	29.4196	0.376858	54.7157	13.8229	42.6976	145.189	Q8CCB5	sp|Q8CCB5|MET24_MOUSE Methyltransferase-like protein 24 OS=Mus musculus GN=Mettl24 PE=2 SV=1	2e-05
KH.C1.175.v3.A.SL1-1	11	464	9	477	7	806	0.304298	16.5599	0.245298	13.1805	0.193794	27.6732	54.4201	53.7327	142.797	0	0	0
KH.C4.506.v1.A.SL1-1	7	303	5	464	9	928	0.088622	4.94904	0.0623678	5.86774	0.114031	14.5818	55.8443	94.0828	127.876	Q96RW7	sp|Q96RW7|HMCN1_HUMAN Hemicentin-1 OS=Homo sapiens GN=HMCN1 PE=1 SV=2	8e-05
KH.S406.9.v2.A.SL2-1	14	184	18	487	8	775	0.287145	4.86884	0.363741	9.97725	0.16421	19.7285	16.956	27.4296	120.142	Q4H3P5	sp|Q4H3P5|DRI_CIOIN Protein dead ringer homolog OS=Ciona intestinalis GN=Ci-DRIL1/2 PE=2 SV=1	4e-120
KH.C3.406.v3.A.ND3-1	37	542	30	104	16	1541	0.80116	15.1409	0.640008	2.24936	0.346715	41.4132	18.8987	3.51459	119.444	P12277	sp|P12277|KCRB_HUMAN Creatine kinase B-type OS=Homo sapiens GN=CKB PE=1 SV=1	3e-120
KH.C12.408.v1.B.ND1-1	21	196	38	311	8	728	0.328289	3.95301	0.585285	4.85631	0.125159	14.125	12.0412	8.29735	112.856	Q08834	sp|Q08834|MGT5A_RAT Alpha-1,6-mannosylglycoprotein 6-beta-N-acetylglucosaminyltransferase A OS=Rattus norvegicus GN=Mgat5 PE=1 SV=1	1e-37
KH.C12.491.v1.A.SL1-1	9	372	0	779	6	534	0.111669	5.95482	0	9.65467	0.0745037	8.22339	53.3255	#DIV/0!	110.376	Q08DX6	sp|Q08DX6|BMP3B_BOVIN Bone morphogenetic protein 3B OS=Bos taurus GN=GDF10 PE=2 SV=1	1e-25
KH.S573.2.v1.A.ND1-1	5	130	11	187	5	432	0.148631	4.98561	0.322166	5.55253	0.148746	15.9383	33.5435	17.235	107.151	Q7TN58	sp|Q7TN58|TMC8_MOUSE Transmembrane channel-like protein 8 OS=Mus musculus GN=Tmc8 PE=1 SV=2	1
KH.C9.218.v1.B.ND1-1	2	132	2	654	4	339	0.0494728	4.21255	0.0487431	16.1593	0.0990221	10.4077	85.1488	331.52	105.105	FALSE	FALSE	FALSE
KH.C4.341.v1.A.SL1-1	4	247	2	656	5	411	0.077492	6.17346	0.0381745	12.6943	0.0969399	9.88229	79.6657	332.534	101.942	Q99853	sp|Q99853|FOXB1_HUMAN Forkhead box protein B1 OS=Homo sapiens GN=FOXB1 PE=2 SV=3	3e-43
KH.C9.20.v1.A.SL3-1	11	296	29	639	5	404	0.12635	4.38642	0.328192	7.33151	0.0574764	5.75949	34.7163	22.3391	100.206	P33202	sp|P33202|UFD4_YEAST Ubiquitin fusion degradation protein 4 OS=Saccharomyces cerevisiae (strain ATCC 204508 / S288c) GN=UFD4 PE=1 SV=1	8.8
KH.C14.153.v1.A.SL1-1	21	115	4	584	4	317	0.167772	1.18531	0.0314851	4.66038	0.0319812	3.14324	7.06501	148.018	98.284	O70444	sp|O70444|PIM3_RAT Serine/threonine-protein kinase pim-3 OS=Rattus norvegicus GN=Pim3 PE=1 SV=3	2e-22
KH.C14.446.v1.A.ND1-1	20	399	21	1133	7	550	0.267933	6.89611	0.27718	15.1613	0.0938492	9.14489	25.7381	54.6982	97.4424	A9CKY2	sp|A9CKY2|AHLLB_AGRT5 N-acyl homoserine lactonase AiiB OS=Agrobacterium tumefaciens (strain C58 / ATCC 33970) GN=aiiB PE=1 SV=1	1.1
KH.C2.919.v1.A.SL1-1	10	131	12	276	4	304	0.287372	4.8568	0.33976	7.92251	0.115038	10.8427	16.9007	23.3179	94.2534	C9JJ37	sp|C9JJ37|BTBDJ_HUMAN BTB/POZ domain-containing protein 19 OS=Homo sapiens GN=BTBD19 PE=2 SV=1	4e-08
KH.C9.247.v2.A.SL2-1	13	271	16	856	4	303	0.102308	2.75149	0.12406	6.72896	0.0315036	2.95956	26.8943	54.2396	93.9433	Q9HCL0	sp|Q9HCL0|PCD18_HUMAN Protocadherin-18 OS=Homo sapiens GN=PCDH18 PE=2 SV=3	5e-10
KH.S655.2.v2.B.SL3-1	40	921	25	1002	17	1259	0.204463	6.07363	0.125904	5.116	0.0869638	7.98728	29.7053	40.6341	91.846	P02463	sp|P02463|CO4A1_MOUSE Collagen alpha-1(IV) chain OS=Mus musculus GN=Col4a1 PE=2 SV=4	6e-71
KH.C4.57.v1.A.SL1-1	4	190	9	117	7	513	0.106394	6.51997	0.235856	3.10851	0.186334	16.9353	61.2813	13.1797	90.8872	Q9QZ47	sp|Q9QZ47|TNNT3_MOUSE Troponin T, fast skeletal muscle OS=Mus musculus GN=Tnnt3 PE=2 SV=3	4e-15
KH.C9.120.v1.C.ND1-1	20	241	18	349	10	722	1.06668	16.5827	0.94585	18.5925	0.533751	47.7925	15.5461	19.6569	89.5407	Q96S96	sp|Q96S96|PEBP4_HUMAN Phosphatidylethanolamine-binding protein 4 OS=Homo sapiens GN=PEBP4 PE=1 SV=3	8.5
KH.S164.28.v1.A.SL1-1	7	185	6	742	11	736	0.124874	4.25776	0.105456	13.2217	0.196383	16.2956	34.0964	125.376	82.9791	P22083	sp|P22083|FUT4_HUMAN Alpha-(1,3)-fucosyltransferase 4 OS=Homo sapiens GN=FUT4 PE=1 SV=3	3e-12
KH.S1248.1.v1.A.ND1-1	145	567	124	2104	23	1534	2.90314	14.646	2.44607	42.078	0.460855	38.1193	5.04486	17.2023	82.7144	P0C6X5	sp|P0C6X5|R1AB_CVHNL Replicase polyprotein 1ab OS=Human coronavirus NL63 GN=rep PE=3 SV=1	4.8
KH.C14.356.v1.C.SL1-1	926	36517	1284	67308	1580	104467	19.2208	977.889	26.2586	1395.52	32.8211	2691.28	50.8766	53.1452	81.9984	0	0	0
KH.C5.385.v1.A.SL1-1	7	280	3	484	11	720	0.137236	7.08209	0.0579478	9.47814	0.215823	17.5194	51.6053	163.564	81.1752	Q4VZG9	sp|Q4VZG9|ATPE_CUCSA ATP synthase epsilon chain, chloroplastic OS=Cucumis sativus GN=atpE PE=3 SV=1	0.27
KH.C1.1131.v1.A.ND1-1	8	132	2	303	8	520	0.192084	4.08894	0.0473128	7.26698	0.192233	15.4962	21.2872	153.594	80.6114	Q9SE95	sp|Q9SE95|FIP2_ARATH FH protein interacting protein FIP2 OS=Arabidopsis thaliana GN=FIP2 PE=1 SV=1	0.029
KH.C8.510.v1.A.ND1-1	25	676	38	2301	61	3885	0.163204	5.69341	0.244411	15.0043	0.398526	31.4776	34.8852	61.3897	78.985	Q8CG65	sp|Q8CG65|SSPO_MOUSE SCO-spondin OS=Mus musculus GN=Sspo PE=2 SV=2	3e-28
KH.C11.291.v1.A.nonSL1-1	56	1159	37	975	30	1900	1.10205	29.4261	0.717403	19.1659	0.590842	46.4074	26.7011	26.7156	78.5445	Q68FR8	sp|Q68FR8|TBA3_RAT Tubulin alpha-3 chain OS=Rattus norvegicus GN=Tuba3a PE=2 SV=1	0
KH.C13.184.v1.A.SL1-1	3	262	9	663	10	630	0.0522583	5.88802	0.154462	11.536	0.174329	13.6205	112.672	74.685	78.1311	Q6P3P5	sp|Q6P3P5|B3GN5_XENTR Lactosylceramide 1,3-N-acetyl-beta-D-glucosaminyltransferase OS=Xenopus tropicalis GN=b3gnt5 PE=2 SV=1	8e-05
KH.C2.453.v1.A.SL2-2	2	123	5	236	6	366	0.0454586	3.60683	0.11197	5.35805	0.136481	10.3249	79.3432	47.8525	75.6507	Q13237	sp|Q13237|KGP2_HUMAN cGMP-dependent protein kinase 2 OS=Homo sapiens GN=PRKG2 PE=1 SV=1	5e-30
KH.C7.269.v1.A.nonSL1-1	106	622	50	1108	26	1567	4.3197	32.7018	2.00754	45.102	1.06037	79.2566	7.5704	22.4663	74.7445	Q5JCX1	sp|Q5JCX1|MOAC_THEKO Probable cyclic pyranopterin monophosphate synthase accessory protein OS=Thermococcus kodakaraensis (strain ATCC BAA-918 / JCM 12380 / KOD1) GN=moaC PE=3 SV=1	0.98
KH.C1.244.v1.A.SL2-1	22	600	28	914	22	1255	0.114564	4.03098	0.143658	4.75423	0.114652	8.11125	35.1854	33.0941	70.7464	P08120	sp|P08120|CO4A1_DROME Collagen alpha-1(IV) chain OS=Drosophila melanogaster GN=Cg25C PE=2 SV=3	7e-123
KH.C2.22.v1.A.ND1-1	112	474	109	1584	68	3844	3.93502	21.4853	3.77313	55.5895	2.39096	167.622	5.46003	14.733	70.1064	P15215	sp|P15215|LAMC1_DROME Laminin subunit gamma-1 OS=Drosophila melanogaster GN=LanB2 PE=2 SV=2	0.026
KH.C9.209.v1.A.SL1-1	6	138	2	259	5	276	0.0614702	1.82401	0.0201878	2.65046	0.0512648	3.50947	29.6731	131.29	68.4577	Q92570	sp|Q92570|NR4A3_HUMAN Nuclear receptor subfamily 4 group A member 3 OS=Homo sapiens GN=NR4A3 PE=2 SV=3	2e-21
KH.C8.863.v1.A.SL1-1	27	194	10	803	19	1023	0.283338	2.62649	0.103392	8.41715	0.19954	13.324	9.26984	81.41	66.7737	D2GXS7	sp|D2GXS7|TRIM2_AILME Tripartite motif-containing protein 2 OS=Ailuropoda melanoleuca GN=TRIM2 PE=3 SV=1	1e-13
KH.C14.337.v1.C.ND1-1	48	1587	158	3248	86	4590	0.467721	19.9506	1.51687	31.6133	0.838647	55.5107	42.655	20.8411	66.1908	A8AZU4	sp|A8AZU4|MUTS_STRGC DNA mismatch repair protein MutS OS=Streptococcus gordonii (strain Challis / ATCC 35105 / CH1 / DL1 / V288) GN=mutS PE=3 SV=1	3.9
KH.C5.326.v1.A.ND1-1	18	123	15	474	6	307	0.316565	2.7908	0.259913	8.32678	0.105603	6.70111	8.81591	32.0368	63.4557	Q6EV77	sp|Q6EV77|FUT8_PANTR Alpha-(1,6)-fucosyltransferase OS=Pan troglodytes GN=FUT8 PE=2 SV=1	3e-19
KH.S594.3.v1.B.SL1-1	24	227	23	406	8	403	0.402073	4.9063	0.379637	6.79405	0.134128	8.3795	12.2025	17.8962	62.4739	Q1ITW5	sp|Q1ITW5|KYNU_KORVE Kynureninase OS=Koribacter versatilis (strain Ellin345) GN=kynU PE=3 SV=1	1e-33
KH.C4.467.v1.A.ND1-1	39	113	11	180	11	552	0.714166	2.66961	0.19846	3.29242	0.201587	12.5456	3.73808	16.5898	62.2343	P82251	sp|P82251|BAT1_HUMAN B(0,+)-type amino acid transporter 1 OS=Homo sapiens GN=SLC7A9 PE=1 SV=1	2e-60
KH.S908.2.v1.A.ND1-1	16	126	5	120	12	595	0.112607	1.14407	0.0346707	0.8436	0.0845207	5.19735	10.1598	24.3318	61.4921	Q66K08	sp|Q66K08|CILP1_MOUSE Cartilage intermediate layer protein 1 OS=Mus musculus GN=Cilp PE=2 SV=1	7e-42
KH.C11.701.v1.A.SL1-1	34	161	16	346	4	197	1.27988	7.81902	0.593415	13.01	0.150691	9.20401	6.10916	21.9239	61.0787	0	0	0
KH.C14.154.v1.B.SL3-1	12	176	6	308	6	285	0.187688	3.55143	0.0924599	4.81189	0.0939166	5.53247	18.9219	52.043	58.9084	O54991	sp|O54991|CNTP1_MOUSE Contactin-associated protein 1 OS=Mus musculus GN=Cntnap1 PE=2 SV=2	0.029
KH.C5.235.v1.A.SL1-1	15	590	3	1377	59	2802	0.210377	10.6756	0.0414547	19.2908	0.828121	48.7746	50.7452	465.345	58.8979	Q2QI47	sp|Q2QI47|USH2A_MOUSE Usherin OS=Mus musculus GN=Ush2A PE=1 SV=2	0.019
KH.S1075.1.v2.A.SL2-1	36	155	45	363	27	1282	0.640007	3.55507	0.788209	6.44611	0.480376	28.2871	5.55474	8.17818	58.8854	Q91WM2	sp|Q91WM2|CECR5_MOUSE Cat eye syndrome critical region protein 5 homolog OS=Mus musculus GN=Cecr5 PE=2 SV=1	3e-40
KH.C14.261.v1.B.nonSL2-1	203	7915	254	16536	499	23598	9.63667	484.748	11.8798	784.098	23.7065	1390.35	50.3025	66.0023	58.6486	Q3SZV7	sp|Q3SZV7|HEMO_BOVIN Hemopexin OS=Bos taurus GN=HPX PE=2 SV=1	6.3
KH.L149.19.v1.A.ND1-1	12	153	28	198	6	282	0.48145	7.91947	1.10681	7.93495	0.240911	14.0423	16.4492	7.16918	58.2883	P03256	sp|P03256|E1A_ADE07 Early E1A 28 kDa protein OS=Human adenovirus B serotype 7 PE=3 SV=1	5.6
KH.L106.9.v1.A.SL2-1	34	108	46	552	11	516	0.727588	2.9817	0.969864	11.7993	0.235578	13.7049	4.09807	12.1659	58.1755	P15941	sp|P15941|MUC1_HUMAN Mucin-1 OS=Homo sapiens GN=MUC1 PE=1 SV=3	0.37
KH.C4.247.v2.A.ND1-1	3	310	14	814	6	271	0.0693539	9.24583	0.318878	18.7968	0.138815	7.77567	133.314	58.9466	56.0146	Q8CIZ8	sp|Q8CIZ8|VWF_MOUSE von Willebrand factor OS=Mus musculus GN=Vwf PE=1 SV=2	1.9
KH.C11.4.v1.A.SL1-1	31	416	68	485	41	1783	0.171178	2.96356	0.369949	2.67508	0.226572	12.2196	17.3127	7.23095	53.9325	P02565	sp|P02565|MYH3_CHICK Myosin-3 OS=Gallus gallus GN=MYH3 PE=2 SV=3	0
KH.L36.7.v1.A.SL1-1	1	164	0	453	4	171	0.0276143	5.84268	0	12.4951	0.110542	5.86069	211.582	#DIV/0!	53.0175	P15989	sp|P15989|CO6A3_CHICK Collagen alpha-3(VI) chain OS=Gallus gallus GN=COL6A3 PE=2 SV=2	0.001
KH.L154.60.v1.B.ND1-1	42	271	45	593	18	740	0.871204	7.25227	0.919664	12.2867	0.373662	19.0511	8.32443	13.3599	50.985	Q5EA01	sp|Q5EA01|B3GN1_BOVIN N-acetyllactosaminide beta-1,3-N-acetylglucosaminyltransferase OS=Bos taurus GN=B3GNT1 PE=2 SV=2	9e-16
KH.C10.496.v1.A.SL1-1	27	487	19	1549	59	2420	0.28003	6.51634	0.194151	16.0473	0.61239	31.1512	23.2702	82.6533	50.8682	Q9DBI0	sp|Q9DBI0|TMPS6_MOUSE Transmembrane protease serine 6 OS=Mus musculus GN=Tmprss6 PE=1 SV=4	1e-15
KH.S803.3.v1.A.ND1-1	85	673	69	878	32	1307	1.09621	11.1976	0.876739	11.3104	0.41301	20.9204	10.2148	12.9005	50.6534	Q63870	sp|Q63870|CO7A1_MOUSE Collagen alpha-1(VII) chain OS=Mus musculus GN=Col7a1 PE=1 SV=3	4e-05
KH.C9.208.v1.A.ND1-1	45	487	27	544	25	1017	0.0916977	1.28029	0.0542071	1.10727	0.0509825	2.57209	13.9621	20.4267	50.4504	Q8WZ42	sp|Q8WZ42|TITIN_HUMAN Titin OS=Homo sapiens GN=TTN PE=1 SV=4	0
KH.C6.95.v1.A.SL1-1	61	191	71	730	13	519	1.21975	4.9273	1.39877	14.5805	0.260148	12.8804	4.0396	10.4238	49.5116	Q32KZ9	sp|Q32KZ9|TEKT1_BOVIN Tektin-1 OS=Bos taurus GN=TEKT1 PE=2 SV=1	7e-68
KH.C8.433.v2.B.nonSL2-1	1	138	6	563	15	596	0.0157277	2.80013	0.0929743	8.84469	0.236098	11.634	178.038	95.1305	49.2763	P10079	sp|P10079|FBP1_STRPU Fibropellin-1 OS=Strongylocentrotus purpuratus GN=EGF1 PE=1 SV=2	3e-31
KH.C7.140.v1.A.ND1-1	0	205	0	191	9	351	0	8.87116	0	6.39933	0.302114	14.6123	#DIV/0!	#DIV/0!	48.3669	Q2VPK5	sp|Q2VPK5|CTU2_HUMAN Cytoplasmic tRNA 2-thiolation protein 2 OS=Homo sapiens GN=CTU2 PE=1 SV=1	1.7
KH.S1432.1.v1.A.ND1-1	18	140	18	470	7	271	0.0980701	0.984071	0.0966236	2.55783	0.0381679	1.83254	10.0344	26.4721	48.0125	B5FEY0	sp|B5FEY0|NRFA_VIBFM Cytochrome c-552 OS=Vibrio fischeri (strain MJ11) GN=nrfA PE=3 SV=1	0.78
KH.C10.190.v1.A.SL1-1	18	139	9	490	19	735	0.155815	1.55233	0.0767582	4.23683	0.164598	7.89663	9.96269	55.1971	47.9752	Q5K2P9	sp|Q5K2P9|POLS2_RAT Polyserase-2 OS=Rattus norvegicus GN=Prss36 PE=2 SV=1	8e-20
KH.C4.559.v1.A.SL1-1	131	403	36	1417	53	2044	3.92038	15.5595	1.06146	42.358	1.58733	75.92	3.96888	39.9052	47.8287	Q08092	sp|Q08092|CNN1_PIG Calponin-1 OS=Sus scrofa GN=CNN1 PE=2 SV=1	8e-20
KH.C14.549.v1.B.nonSL2-1	86	2178	122	3842	162	6130	1.17696	38.4553	1.64502	52.5206	2.21878	104.122	32.6734	31.9271	46.9276	Q9UTM2	sp|Q9UTM2|CO111_SCHPO Rsm22-cox11 tandem protein 1, mitochondrial OS=Schizosaccharomyces pombe (strain 972 / ATCC 24843) GN=cox1101 PE=1 SV=2	2.3
KH.L25.3.v1.C.ND1-1	8	228	2	147	3	112	0.0930948	3.42298	0.0229304	1.70868	0.0349375	1.6176	36.7688	74.516	46.2999	O43196	sp|O43196|MSH5_HUMAN MutS protein homolog 5 OS=Homo sapiens GN=MSH5 PE=1 SV=1	6e-70
KH.C1.1067.v1.A.SL1-1	35	245	28	363	6	223	1.05658	9.54191	0.832797	10.9459	0.181268	8.35523	9.03093	13.1435	46.0932	P62168	sp|P62168|NCS1_RAT Neuronal calcium sensor 1 OS=Rattus norvegicus GN=Ncs1 PE=1 SV=2	9e-44
KH.C9.133.v4.A.SL2-1	5	108	4	150	8	291	0.0693127	1.93153	0.0546323	2.07703	0.110986	5.00673	27.8669	38.0184	45.1114	Q8K1S3	sp|Q8K1S3|UNC5B_MOUSE Netrin receptor UNC5B OS=Mus musculus GN=Unc5b PE=1 SV=1	2e-49
KH.S653.4.v1.A.ND1-1	20	383	29	481	17	615	0.311872	7.70513	0.445545	7.49205	0.265296	11.9026	24.706	16.8155	44.8652	Q2QI47	sp|Q2QI47|USH2A_MOUSE Usherin OS=Mus musculus GN=Ush2A PE=1 SV=2	2.9
KH.C11.697.v1.A.SL1-1	42	224	27	325	14	499	0.415506	2.85897	0.263171	3.21159	0.138609	6.12699	6.88071	12.2034	44.2034	O88866	sp|O88866|HUNK_MOUSE Hormonally up-regulated neu tumor-associated kinase OS=Mus musculus GN=Hunk PE=2 SV=1	6e-47
KH.C7.384.v1.A.ND1-1	29	363	71	454	26	924	0.188604	3.04575	0.454944	2.94929	0.169224	7.45837	16.1489	6.48276	44.0739	P70105	sp|P70105|MCP_CAVPO Membrane cofactor protein OS=Cavia porcellus GN=CD46 PE=2 SV=1	0.017
KH.C14.184.v1.A.SL1-1	70	304	45	1415	31	1093	2.09486	11.7372	1.32683	42.2982	0.92844	40.5971	5.60286	31.8791	43.7262	0	0	0
KH.C2.609.v1.A.SL1-1	140	278	0	222	8	276	4.87471	12.4882	0	7.72116	0.27877	11.9275	2.56183	#DIV/0!	42.7861	Q6P767	sp|Q6P767|PTTG_RAT Pituitary tumor-transforming gene 1 protein-interacting protein OS=Rattus norvegicus GN=Pttg1ip PE=2 SV=1	8e-06
KH.C2.244.v1.A.SL3-1	8	175	8	321	8	268	0.238952	6.74363	0.235428	9.57713	0.239137	9.93516	28.2217	40.6797	41.5459	Q6H6C3	sp|Q6H6C3|AGO17_ORYSJ Protein argonaute 17 OS=Oryza sativa subsp. japonica GN=AGO17 PE=2 SV=1	0.42
KH.C11.512.v1.A.ND1-1	8	245	5	275	3	100	0.129355	5.11085	0.0796543	4.44155	0.0485456	2.00683	39.5103	55.7603	41.3392	Q96PZ7	sp|Q96PZ7|CSMD1_HUMAN CUB and sushi domain-containing protein 1 OS=Homo sapiens GN=CSMD1 PE=1 SV=2	1e-06
KH.S483.1.v1.A.nonSL3-1	50	118	43	472	40	1321	1.47503	4.49105	1.24982	13.9086	1.18094	48.3674	3.04471	11.1285	40.9568	Q2RST6	sp|Q2RST6|GLPK_RHORT Glycerol kinase OS=Rhodospirillum rubrum (strain ATCC 11170 / NCIB 8255) GN=glpK PE=3 SV=1	1.6
KH.L108.30.v1.A.SL2-1	41	213	55	465	36	1174	0.764751	5.12567	1.01075	8.6636	0.672008	27.1784	6.7024	8.57142	40.4435	Q5DID0	sp|Q5DID0|UROL1_HUMAN Uromodulin-like 1 OS=Homo sapiens GN=UMODL1 PE=2 SV=2	0.54
KH.C9.692.v3.A.SL1-3	23	236	19	320	20	648	0.399305	5.28595	0.324995	5.54926	0.34749	13.9627	13.2379	17.0749	40.1817	P63079	sp|P63079|GBRB3_RAT Gamma-aminobutyric acid receptor subunit beta-3 OS=Rattus norvegicus GN=Gabrb3 PE=1 SV=1	9e-22
KH.C4.224.v3.A.SL2-1	156	840	211	2240	65	2089	1.64428	11.4226	2.19118	23.5834	0.685644	27.328	6.94687	10.7629	39.8574	Q8NDA2	sp|Q8NDA2|HMCN2_HUMAN Hemicentin-2 OS=Homo sapiens GN=HMCN2 PE=2 SV=2	2e-05
KH.C9.3.v3.A.SL5-1	120	904	43	1063	49	1540	1.44959	14.0886	0.511774	12.8264	0.592373	23.0889	9.719	25.0627	38.977	P48733	sp|P48733|UROM_BOVIN Uromodulin OS=Bos taurus GN=UMOD PE=2 SV=1	0.068
KH.C4.182.v1.A.nonSL1-1	86	346	88	774	32	988	1.37413	7.13247	1.38535	12.3532	0.511699	19.5932	5.19053	8.91704	38.2904	P23950	sp|P23950|TISB_MOUSE Zinc finger protein 36, C3H1 type-like 1 OS=Mus musculus GN=Zfp36l1 PE=2 SV=1	3e-27
KH.C3.511.v1.C.SL1-1	3	458	14	462	19	584	0.0663922	13.0766	0.30526	10.2128	0.420809	16.0409	196.96	33.4562	38.1191	Q7LL04	sp|Q7LL04|YQK1_SCHPO UPF0676 protein C1494.01 OS=Schizosaccharomyces pombe (strain 972 / ATCC 24843) GN=SPCC1494.01 PE=3 SV=2	6e-06
KH.S345.2.v1.C.ND1-1	6	333	31	770	18	547	0.122496	8.77103	0.623563	15.7026	0.367773	13.8605	71.6024	25.1821	37.6876	Q16654	sp|Q16654|PDK4_HUMAN [Pyruvate dehydrogenase (acetyl-transferring)] kinase isozyme 4, mitochondrial OS=Homo sapiens GN=PDK4 PE=1 SV=1	0.77
KH.C6.198.v1.A.SL1-1	50	1249	123	2949	87	2633	0.726827	23.4238	1.76162	42.8198	1.26566	47.5041	32.2275	24.307	37.5331	O60242	sp|O60242|BAI3_HUMAN Brain-specific angiogenesis inhibitor 3 OS=Homo sapiens GN=BAI3 PE=1 SV=2	2e-05
KH.C10.368.v1.A.SL1-1	57	511	25	869	28	820	0.912636	10.5555	0.394375	13.898	0.448659	16.295	11.5659	35.2405	36.3194	Q32L50	sp|Q32L50|SBSPO_BOVIN Somatomedin-B and thrombospondin type-1 domain-containing protein OS=Bos taurus GN=SBSPON PE=2 SV=2	1e-07
KH.S529.6.v1.B.ND1-1	67	248	25	273	55	1598	1.08278	5.17074	0.398065	4.40695	0.889539	32.0526	4.77542	11.071	36.0328	Q9LMF1	sp|Q9LMF1|U85A3_ARATH UDP-glycosyltransferase 85A3 OS=Arabidopsis thaliana GN=UGT85A3 PE=2 SV=2	3.3
KH.C11.274.v2.A.ND1-1	19	391	14	426	21	603	0.207655	5.51316	0.150752	4.65059	0.229691	8.17948	26.5496	30.8492	35.6108	P16109	sp|P16109|LYAM3_HUMAN P-selectin OS=Homo sapiens GN=SELP PE=1 SV=3	1e-10
KH.S1148.2.v1.A.SL1-1	14	149	12	247	9	250	0.240903	3.30776	0.203442	4.24541	0.154986	5.33916	13.7307	20.8679	34.4493	O02670	sp|O02670|IRK5_PIG G protein-activated inward rectifier potassium channel 4 OS=Sus scrofa GN=KCNJ5 PE=2 SV=1	1e-71
KH.C1.142.v2.A.ND1-1	16	170	26	138	30	827	0.10079	1.38159	0.161368	0.86833	0.189127	6.46578	13.7077	5.38106	34.1875	Q8BL43	sp|Q8BL43|RASFA_MOUSE Ras association domain-containing protein 10 OS=Mus musculus GN=Rassf10 PE=2 SV=2	1e-05
KH.C8.915.v1.B.ND1-1	129	526	131	1577	20	550	0.659067	3.46705	0.659414	8.04787	0.10226	3.48756	5.26054	12.2046	34.1048	P43573	sp|P43573|BUD27_YEAST Bud site selection protein 27 OS=Saccharomyces cerevisiae (strain ATCC 204508 / S288c) GN=BUD27 PE=1 SV=1	0.066
KH.C1.1157.v1.A.SL1-1	1	158	0	152	6	161	0.0103233	2.1043	0	1.56736	0.0619875	2.06282	203.841	#DIV/0!	33.2781	Q62897	sp|Q62897|KCND3_RAT Potassium voltage-gated channel subfamily D member 3 OS=Rattus norvegicus GN=Kcnd3 PE=1 SV=2	5e-135
KH.C9.48.v2.A.SL2-1	9	148	2	183	4	106	0.255099	5.41205	0.0558524	5.18114	0.113465	3.72898	21.2155	92.7649	32.8647	Q64299	sp|Q64299|NOV_MOUSE Protein NOV homolog OS=Mus musculus GN=Nov PE=2 SV=1	1e-10
KH.C7.123.v1.A.SL1-1	44	482	87	969	30	783	0.276388	3.90614	0.538434	6.07994	0.188592	6.10446	14.1328	11.2919	32.3686	Q75N90	sp|Q75N90|FBN3_HUMAN Fibrillin-3 OS=Homo sapiens GN=FBN3 PE=2 SV=3	2e-09
KH.C8.164.v1.A.nonSL4-1	49	255	47	792	25	607	1.67796	11.2658	1.58573	27.0907	0.856765	25.7985	6.71396	17.084	30.1115	0	0	0
KH.C7.703.v1.B.SL2-1	65	658	73	1092	82	1983	1.06823	13.9512	1.18201	17.926	1.34865	40.4476	13.0601	15.1657	29.9911	P97767	sp|P97767|EYA1_MOUSE Eyes absent homolog 1 OS=Mus musculus GN=Eya1 PE=1 SV=3	1e-104
KH.C1.591.v1.A.ND1-1	53	149	10	408	28	666	0.684087	2.48117	0.127169	5.26023	0.361684	10.6691	3.62698	41.364	29.4985	Q9UN76	sp|Q9UN76|S6A14_HUMAN Sodium- and chloride-dependent neutral and basic amino acid transporter B(0+) OS=Homo sapiens GN=SLC6A14 PE=2 SV=1	7e-91
KH.C9.543.v2.A.SL1-1	101	872	109	2553	62	1421	2.44775	27.2644	2.60267	61.8024	1.50374	42.7423	11.1386	23.7458	28.424	Q92155	sp|Q92155|VIME_CYPCA Vimentin OS=Cyprinus carpio GN=vim PE=2 SV=1	3e-10
KH.S1391.3.v2.A.SL3-1	22	118	14	184	9	205	0.594319	4.11257	0.372624	4.96505	0.243318	6.87337	6.9198	13.3245	28.2485	P45745	sp|P45745|DHBF_BACSU Dimodular nonribosomal peptide synthase OS=Bacillus subtilis (strain 168) GN=dhbF PE=1 SV=4	6.2
KH.C10.241.v1.A.SL1-1	15	125	17	452	27	614	0.259258	2.78731	0.289492	7.80348	0.467025	13.1713	10.7511	26.9558	28.2025	Q3UHH8	sp|Q3UHH8|GXLT1_MOUSE Glucoside xylosyltransferase 1 OS=Mus musculus GN=Gxylt1 PE=2 SV=2	5e-24
KH.L10.31.v1.A.SL1-1	30	540	29	1549	104	2346	0.305239	7.08838	0.290712	15.7427	1.05898	29.6255	23.2224	54.1522	27.9755	Q02388	sp|Q02388|CO7A1_HUMAN Collagen alpha-1(VII) chain OS=Homo sapiens GN=COL7A1 PE=1 SV=2	0.0002
KH.L63.12.v1.A.SL1-1	3	397	12	526	48	1080	0.0566369	9.66949	0.223206	9.91912	0.906891	25.3059	170.728	44.4393	27.904	Q6QEJ7	sp|Q6QEJ7|PROF_APIME Profilin OS=Apis mellifera PE=2 SV=1	8.9
KH.L131.17.v1.A.SL1-1	15	159	10	359	37	828	0.318801	4.35973	0.209399	7.62134	0.786982	21.8412	13.6754	36.3963	27.7531	Q14517	sp|Q14517|FAT1_HUMAN Protocadherin Fat 1 OS=Homo sapiens GN=FAT1 PE=1 SV=2	0.0001
KH.C10.493.v1.A.ND1-1	2	156	5	461	7	154	0.0552286	5.55767	0.136035	12.7158	0.193449	5.27805	100.63	93.4745	27.2839	Q895J3	sp|Q895J3|PNP_CLOTE Polyribonucleotide nucleotidyltransferase OS=Clostridium tetani (strain Massachusetts / E88) GN=pnp PE=3 SV=1	0.74
KH.C9.36.v2.A.SL2-1	37	334	48	374	39	851	0.0190226	0.221538	0.0243139	0.192065	0.0200663	0.54302	11.6461	7.89938	27.0613	A2ASS6	sp|A2ASS6|TITIN_MOUSE Titin OS=Mus musculus GN=Ttn PE=1 SV=1	0
KH.C13.79.v1.A.ND1-1	253	587	138	937	84	1832	2.3056	6.90137	1.23905	8.52926	0.766087	20.7208	2.99331	6.88372	27.0476	Q9DER7	sp|Q9DER7|TLL1_CHICK Tolloid-like protein 1 OS=Gallus gallus GN=TLL1 PE=2 SV=1	0.0007
KH.C7.53.v1.C.ND1-1	13	170	16	507	7	151	0.231114	3.89911	0.280252	9.00325	0.124542	3.33179	16.871	32.1255	26.7524	P51871	sp|P51871|CP4F6_RAT Cytochrome P450 4F6 OS=Rattus norvegicus GN=Cyp4f6 PE=2 SV=1	6e-49
KH.C5.208.v1.A.SL1-1	7	250	14	400	17	362	0.132555	6.10764	0.2612	7.56603	0.322169	8.50798	46.0762	28.9664	26.4085	A7TR10	sp|A7TR10|RTC1_VANPO Restriction of telomere capping protein 1 OS=Vanderwaltozyma polyspora (strain ATCC 22028 / DSM 70294) GN=RTC1 PE=3 SV=1	3
KH.C12.402.v1.A.SL1-1	47	161	51	425	19	403	0.8294	3.66544	0.886712	7.49142	0.335548	8.82653	4.41939	8.44853	26.3048	Q8GWV5	sp|Q8GWV5|PUB3_ARATH U-box domain-containing protein 3 OS=Arabidopsis thaliana GN=PUB3 PE=2 SV=2	0.72
KH.C10.335.v2.A.SL1-2	18	211	18	367	19	402	0.521123	7.88106	0.513437	10.6131	0.550499	14.4448	15.1232	20.6707	26.2395	P53440	sp|P53440|CALMF_NAEGR Calmodulin, flagellar OS=Naegleria gruberi GN=CAM1 PE=2 SV=1	2e-09
KH.L40.4.v1.A.SL1-1	300	682	85	806	66	1392	10.6851	31.3384	2.98279	28.6749	2.35254	61.5341	2.9329	9.61343	26.1564	P70445	sp|P70445|4EBP2_MOUSE Eukaryotic translation initiation factor 4E-binding protein 2 OS=Mus musculus GN=Eif4ebp2 PE=2 SV=1	7e-15
KH.C11.299.v1.A.SL2-1	25	255	19	1279	38	791	0.406347	5.34726	0.304269	20.7652	0.618125	15.957	13.1594	68.2463	25.8152	P79282	sp|P79282|FUT8_PIG Alpha-(1,6)-fucosyltransferase OS=Sus scrofa GN=FUT8 PE=1 SV=1	1e-19
KH.C5.588.v1.A.SL1-1	202	1422	266	4388	427	8688	8.84637	80.3429	11.4774	191.951	18.7145	472.229	9.08202	16.7243	25.2334	P79382	sp|P79382|MGST1_PIG Microsomal glutathione S-transferase 1 OS=Sus scrofa GN=MGST1 PE=2 SV=3	2e-14
KH.L102.3.v1.A.ND1-1	35	179	34	276	15	297	0.459771	3.03362	0.440047	3.62153	0.197197	4.84227	6.59811	8.22986	24.5555	Q5U3U0	sp|Q5U3U0|PHYD1_DANRE Phytanoyl-CoA dioxygenase domain-containing protein 1 OS=Danio rerio GN=phyhd1 PE=2 SV=1	2e-37
KH.C1.1240.v1.A.SL1-1	156	1527	138	2610	113	2161	1.50034	18.947	1.30765	25.0735	1.08763	25.7953	12.6284	19.1745	23.717	Q7QGL0	sp|Q7QGL0|KLHDB_ANOGA Kelch-like protein diablo OS=Anopheles gambiae GN=dbo PE=3 SV=4	7e-07
KH.L20.48.v1.A.SL1-1	74	394	77	845	26	493	1.73002	11.8837	1.77361	19.7327	0.608316	14.3049	6.86909	11.1257	23.5156	Q4V8A9	sp|Q4V8A9|SG196_RAT Protein O-mannose kinase OS=Rattus norvegicus GN=Pomk PE=2 SV=1	0.0008
KH.C8.188.v1.A.ND1-1	85	237	63	574	23	421	1.18625	4.26717	0.866251	8.00162	0.321233	7.29219	3.59719	9.23706	22.7006	Q6GM71	sp|Q6GM71|LRWD1_XENLA Leucine-rich repeat and WD repeat-containing protein 1 OS=Xenopus laevis GN=lrwd1 PE=2 SV=1	9e-26
KH.S870.2.v1.B.ND1-1	10	102	12	411	27	489	0.114105	1.50155	0.134907	4.68443	0.308322	6.92521	13.1594	34.7235	22.461	P04323	sp|P04323|POL3_DROME Retrovirus-related Pol polyprotein from transposon 17.6 OS=Drosophila melanogaster GN=pol PE=4 SV=1	2e-17
KH.L164.3.v1.A.ND1-1	33	101	37	181	11	195	1.22885	4.85223	1.35748	6.73245	0.409934	9.01237	3.94859	4.95952	21.9849	Q5FF75	sp|Q5FF75|GUAA_EHRRG GMP synthase [glutamine-hydrolyzing] OS=Ehrlichia ruminantium (strain Gardel) GN=guaA PE=3 SV=1	4.3
KH.C12.390.v1.R.ND2-1	13	107	9	230	14	246	0.0900664	0.956395	0.0614339	1.59168	0.0970695	2.11531	10.6188	25.9088	21.7917	Q3UR85	sp|Q3UR85|MRF_MOUSE Myelin regulatory factor OS=Mus musculus GN=Myrf PE=1 SV=2	3e-84
KH.C10.549.v1.A.SL1-1	312	1274	152	1381	69	1207	1.94491	10.2459	0.933546	8.59901	0.430457	9.33838	5.26804	9.21112	21.6941	Q6UXX5	sp|Q6UXX5|ITIH6_HUMAN Inter-alpha-trypsin inhibitor heavy chain H6 OS=Homo sapiens GN=ITIH6 PE=2 SV=1	4e-17
KH.C1.274.v1.A.SL1-1	56	483	54	235	26	451	0.37103	4.1286	0.352502	1.55524	0.172397	3.70866	11.1274	4.41201	21.5123	Q8CFC2	sp|Q8CFC2|MYT1_MOUSE Myelin transcription factor 1 OS=Mus musculus GN=Myt1 PE=1 SV=1	5e-27
KH.C9.204.v4.A.SL1-1	18	122	18	319	14	242	0.406749	3.55671	0.400749	7.20034	0.316605	6.78716	8.74423	17.9672	21.4373	Q6GMK8	sp|Q6GMK8|GMPAA_DANRE Mannose-1-phosphate guanyltransferase alpha-A OS=Danio rerio GN=gmppaa PE=2 SV=1	9e-55
KH.C10.607.v1.A.ND1-1	26	109	30	369	18	306	0.220462	1.1924	0.250628	3.12533	0.152746	3.22034	5.40863	12.47	21.083	P03360	sp|P03360|POL_AVIRE Pol polyprotein (Fragment) OS=Avian reticuloendotheliosis virus GN=pol PE=3 SV=1	9.5
KH.C1.1286.v1.A.SL3-1	17	227	41	284	33	555	0.196795	3.39021	0.467624	3.28393	0.38231	7.97403	17.2271	7.02258	20.8575	Q8N1V2	sp|Q8N1V2|WDR16_HUMAN WD repeat-containing protein 16 OS=Homo sapiens GN=WDR16 PE=1 SV=3	1e-148
KH.S1660.1.v1.B.ND2-1	188	313	158	469	44	733	8.30342	17.8352	6.87548	20.691	1.94486	40.1811	2.14793	3.00939	20.6602	P14735	sp|P14735|IDE_HUMAN Insulin-degrading enzyme OS=Homo sapiens GN=IDE PE=1 SV=4	6.1
KH.C11.367.v1.A.ND1-1	59	317	78	323	14	233	0.84037	5.82522	1.09461	4.59547	0.199564	4.11901	6.93173	4.19827	20.6401	0	0	0
KH.C3.611.v1.A.SL1-1	65	507	43	879	60	998	0.895476	9.0112	0.583654	12.0959	0.827232	17.0644	10.063	20.7244	20.6283	P12255	sp|P12255|FHAB_BORPE Filamentous hemagglutinin OS=Bordetella pertussis (strain Tohama I / ATCC BAA-589 / NCTC 13251) GN=fhaB PE=1 SV=4	3.6
KH.C2.593.v1.A.SL2-1	52	235	49	732	37	603	3.08563	17.9905	2.86473	43.3871	2.19724	44.4096	5.83041	15.1453	20.2115	Q8BM85	sp|Q8BM85|TBCK_MOUSE TBC domain-containing protein kinase-like protein OS=Mus musculus GN=Tbck PE=2 SV=1	6.2
KH.C7.753.v1.A.ND1-1	37	151	37	200	32	520	0.4487	2.36247	0.442081	2.42266	0.388364	7.82666	5.26514	5.48013	20.1529	Q9H3U7	sp|Q9H3U7|SMOC2_HUMAN SPARC-related modular calcium-binding protein 2 OS=Homo sapiens GN=SMOC2 PE=2 SV=2	0.24
KH.C4.450.v1.A.ND1-1	79	615	46	1253	70	1133	0.468064	4.70097	0.268524	7.41546	0.415061	8.33157	10.0434	27.6157	20.0731	P10079	sp|P10079|FBP1_STRPU Fibropellin-1 OS=Strongylocentrotus purpuratus GN=EGF1 PE=1 SV=2	2e-14
KH.C4.230.v1.A.SL2-1	182	605	90	1101	76	1221	4.8827	20.9401	2.37891	29.5043	2.04051	40.6559	4.28863	12.4024	19.9244	Q5RFN6	sp|Q5RFN6|CNN2_PONAB Calponin-2 OS=Pongo abelii GN=CNN2 PE=2 SV=3	2e-18
KH.S765.1.v3.A.ND3-1	180	1646	183	5750	234	3744	2.90595	34.2831	2.91081	92.7241	3.78066	75.0189	11.7975	31.8551	19.8428	Q6HI76	sp|Q6HI76|Y2424_BACHK Putative ABC transporter ATP-binding protein BT9727_2424 OS=Bacillus thuringiensis subsp. konkukian (strain 97-27) GN=BT9727_2424 PE=3 SV=1	1.5
KH.C8.778.v1.A.SL1-1	51	175	51	314	34	533	0.710474	3.14521	0.699994	4.36935	0.474015	9.21561	4.42693	6.24197	19.4416	P59991	sp|P59991|KR122_HUMAN Keratin-associated protein 12-2 OS=Homo sapiens GN=KRTAP12-2 PE=1 SV=1	0.004
KH.C11.485.v1.A.SL1-1	41	203	65	489	42	645	0.57659	3.6831	0.900623	6.86912	0.59111	11.258	6.38773	7.62707	19.0456	P78412	sp|P78412|IRX6_HUMAN Iroquois-class homeodomain protein IRX-6 OS=Homo sapiens GN=IRX6 PE=2 SV=3	1e-27
KH.C3.905.v1.C.SL1-1	61	281	72	680	43	648	0.91673	5.44819	1.06608	10.2077	0.646719	12.0866	5.94307	9.575	18.6892	Q8R5M3	sp|Q8R5M3|LRC15_RAT Leucine-rich repeat-containing protein 15 OS=Rattus norvegicus GN=Lrrc15 PE=2 SV=1	1e-12
KH.C3.232.v1.A.SL1-1	59	201	23	184	29	431	2.87995	12.6579	1.10613	8.97138	1.41666	26.1113	4.3952	8.11059	18.4316	Q9W7R3	sp|Q9W7R3|TEN4_DANRE Teneurin-4 OS=Danio rerio GN=tenm4 PE=2 SV=1	0.002
KH.C4.554.v1.A.SL1-1	28	103	22	373	28	406	0.699858	3.32142	0.541777	9.31257	0.700398	12.595	4.74585	17.1889	17.9826	Q1E8C2	sp|Q1E8C2|ATG12_COCIM Ubiquitin-like protein ATG12 OS=Coccidioides immitis (strain RS) GN=ATG12 PE=3 SV=1	0.051
KH.C9.579.v1.A.SL1-1	79	145	59	497	45	651	1.61287	3.81922	1.18678	10.1353	0.919433	16.4957	2.36797	8.54018	17.9412	A2BGL3	sp|A2BGL3|WSCD2_DANRE WSC domain-containing protein 2 OS=Danio rerio GN=wscd2 PE=3 SV=1	1e-11
KH.C3.134.v1.A.SL1-1	113	404	123	542	66	949	2.93778	13.5505	3.15059	14.075	1.7172	30.6215	4.61251	4.46742	17.8322	Q8K4B4	sp|Q8K4B4|IL23R_MOUSE Interleukin-23 receptor OS=Mus musculus GN=Il23r PE=2 SV=1	0.016
KH.C1.738.v1.A.SL1-1	416	683	358	1976	171	2405	8.54357	18.0968	7.24395	40.5361	3.51462	61.3028	2.11817	5.59585	17.4422	Q6DBY9	sp|Q6DBY9|CHST1_DANRE Carbohydrate sulfotransferase 1 OS=Danio rerio GN=chst1 PE=2 SV=2	2e-18
KH.L147.25.v1.A.ND1-1	137	236	231	959	21	293	1.12963	2.51051	1.87661	7.89847	0.173289	2.99849	2.22242	4.2089	17.3034	Q4LDE5	sp|Q4LDE5|SVEP1_HUMAN Sushi, von Willebrand factor type A, EGF and pentraxin domain-containing protein 1 OS=Homo sapiens GN=SVEP1 PE=1 SV=3	3e-40
KH.S1321.1.v1.B.ND1-1	61	162	32	288	34	471	0.840742	2.8806	0.43454	3.96492	0.468972	8.05699	3.42625	9.12441	17.1801	Q923L3	sp|Q923L3|CSMD1_MOUSE CUB and sushi domain-containing protein 1 OS=Mus musculus GN=Csmd1 PE=2 SV=2	2e-10
KH.S1293.2.v1.A.ND1-1	33	105	36	216	22	303	0.803517	3.29841	0.863635	5.25344	0.536092	9.15678	4.10497	6.08294	17.0806	Q8R0A2	sp|Q8R0A2|ZBT44_MOUSE Zinc finger and BTB domain-containing protein 44 OS=Mus musculus GN=Zbtb44 PE=1 SV=2	1e-09
KH.C13.90.v3.A.SL2-1	9	139	13	362	20	274	0.0622012	1.23938	0.0885209	2.49904	0.138332	2.35031	19.9254	28.2311	16.9904	P18910	sp|P18910|ANPRA_RAT Atrial natriuretic peptide receptor 1 OS=Rattus norvegicus GN=Npr1 PE=1 SV=1	9e-135
KH.C12.675.v1.A.nonSL2-1	85	250	127	774	113	1539	2.28235	8.6604	3.3598	20.7593	3.03653	51.2886	3.79451	6.17874	16.8905	O57342	sp|O57342|MAFA_COTJA Transcription factor MafA OS=Coturnix coturnix japonica GN=MAFA PE=1 SV=1	7e-18
KH.C9.781.v1.A.ND1-1	17	111	12	455	20	268	0.336469	2.83435	0.234004	8.99531	0.396152	6.58339	8.42381	38.4408	16.6184	Q8BQ86	sp|Q8BQ86|CHST8_MOUSE Carbohydrate sulfotransferase 8 OS=Mus musculus GN=Chst8 PE=2 SV=1	4e-11
KH.C14.166.v2.B.SL2-2	328	728	346	2847	388	5195	6.34249	18.1615	6.59187	54.9898	7.5085	124.678	2.86347	8.34207	16.6049	Q62720	sp|Q62720|ZNT1_RAT Zinc transporter 1 OS=Rattus norvegicus GN=Slc30a1 PE=2 SV=1	4e-23
KH.L116.92.v1.A.SL1-1	106	801	151	305	158	2105	0.978892	9.54324	1.37389	2.81344	1.46023	24.1268	9.74902	2.04779	16.5226	Q92105	sp|Q92105|AT2A1_RANES Sarcoplasmic/endoplasmic reticulum calcium ATPase 1 OS=Rana esculenta GN=ATP2A1 PE=2 SV=1	0
KH.S1914.1.v1.B.ND1-1	226	496	215	1162	93	1219	7.29717	20.6615	6.8396	37.4767	3.00514	48.8504	2.83144	5.47936	16.2556	Q5WFJ5	sp|Q5WFJ5|PYRF_BACSK Orotidine 5'-phosphate decarboxylase OS=Bacillus clausii (strain KSM-K16) GN=pyrF PE=3 SV=1	0.015
KH.C7.484.v1.A.SL1-1	82	162	169	561	163	2134	0.149498	0.381039	0.303566	1.02163	0.297402	4.82874	2.5488	3.36541	16.2364	Q96RW7	sp|Q96RW7|HMCN1_HUMAN Hemicentin-1 OS=Homo sapiens GN=HMCN1 PE=1 SV=2	0
KH.C9.40.v1.A.SL1-1	90	419	60	1008	83	1062	2.46558	14.809	1.61947	27.5833	2.27557	36.1093	6.00628	17.0322	15.8683	Q92502	sp|Q92502|STAR8_HUMAN StAR-related lipid transfer protein 8 OS=Homo sapiens GN=STARD8 PE=1 SV=2	1.2
KH.C9.445.v1.A.SL1-1	4	255	7	394	28	354	0.120752	9.93138	0.208199	11.8806	0.845918	13.2635	82.246	57.0638	15.6794	Q9PTU6	sp|Q9PTU6|ENDOU_PAROL Poly(U)-specific endoribonuclease OS=Paralichthys olivaceus GN=endou PE=2 SV=1	4e-24
KH.L14.1.v1.A.SL4-1	221	1408	336	3992	277	3486	3.13347	25.7555	4.69374	56.537	3.93051	61.3451	8.21949	12.0452	15.6074	Q6TEM9	sp|Q6TEM9|MYLIA_DANRE E3 ubiquitin-protein ligase MYLIP-A OS=Danio rerio GN=mylipa PE=1 SV=2	7e-20
KH.L112.16.v1.A.ND1-1	146	1098	157	2887	195	2453	2.95168	28.6386	3.12724	58.3004	3.94535	61.5506	9.7025	18.6427	15.6008	P08798	sp|P08798|PSV_DICDI Prespore vesicle protein OS=Dictyostelium discoideum GN=psvA PE=2 SV=3	1.8
KH.L119.20.v1.A.SL1-1	70	192	37	111	32	402	1.60632	5.68419	0.836529	2.54428	0.734883	11.4493	3.53865	3.04147	15.5797	O33341	sp|O33341|Y2859_MYCTU Putative glutamine amidotransferase Rv2859c OS=Mycobacterium tuberculosis GN=Rv2859c PE=1 SV=1	1.5
KH.C13.80.v2.A.SL3-1	35	117	27	114	15	187	0.342441	1.47686	0.260273	1.11412	0.146874	2.2708	4.31273	4.28059	15.4609	Q80TN7	sp|Q80TN7|NAV3_MOUSE Neuron navigator 3 OS=Mus musculus GN=Nav3 PE=1 SV=2	8e-25
KH.C7.523.v1.A.SL1-1	444	934	447	2624	312	3883	4.92354	13.3621	4.88369	29.0648	3.46245	53.4417	2.71393	5.95139	15.4346	Q06831	sp|Q06831|SOX4_MOUSE Transcription factor SOX-4 OS=Mus musculus GN=Sox4 PE=1 SV=2	6e-19
KH.C4.52.v1.A.ND1-1	57	137	7	232	24	298	2.1509	6.6696	0.260249	8.74464	0.906341	13.9566	3.10085	33.601	15.3989	0	0	0
KH.C7.633.v1.A.nonSL3-1	9	210	20	107	35	424	0.0519189	1.56292	0.113674	0.616561	0.202063	3.03576	30.1031	5.42396	15.0238	P11087	sp|P11087|CO1A1_MOUSE Collagen alpha-1(I) chain OS=Mus musculus GN=Col1a1 PE=1 SV=4	2e-31
KH.C14.498.v1.B.SL1-1	46	238	54	978	45	541	0.467269	3.11903	0.540442	9.92331	0.457464	6.82064	6.67503	18.3615	14.9097	Q8BQ86	sp|Q8BQ86|CHST8_MOUSE Carbohydrate sulfotransferase 8 OS=Mus musculus GN=Chst8 PE=2 SV=1	6e-12
KH.C4.231.v2.A.SL2-1	34	178	23	531	46	553	0.847103	5.72153	0.564588	13.2148	1.14697	17.1002	6.75422	23.4061	14.9091	Q8CSF9	sp|Q8CSF9|ARGJ_STAES Arginine biosynthesis bifunctional protein ArgJ OS=Staphylococcus epidermidis (strain ATCC 12228) GN=argJ PE=3 SV=1	2.4
KH.C4.127.v1.A.SL3-1	136	820	161	1226	150	1776	3.26292	25.3814	3.80574	29.381	3.60159	52.8846	7.77874	7.72017	14.6837	P97840	sp|P97840|LEG9_RAT Galectin-9 OS=Rattus norvegicus GN=Lgals9 PE=2 SV=2	3e-14
KH.C3.67.v1.B.ND1-1	58	143	37	135	22	259	0.702272	2.23382	0.441393	1.63275	0.266585	3.8922	3.18084	3.69909	14.6003	Q9ER75	sp|Q9ER75|IRX6_MOUSE Iroquois-class homeodomain protein IRX-6 OS=Mus musculus GN=Irx6 PE=2 SV=2	4e-30
KH.C6.163.v1.A.SL1-1	4	100	11	199	14	164	0.0527458	1.70123	0.142912	2.62114	0.184753	2.68405	32.2533	18.341	14.5278	O43155	sp|O43155|FLRT2_HUMAN Leucine-rich repeat transmembrane protein FLRT2 OS=Homo sapiens GN=FLRT2 PE=1 SV=1	5e-18
KH.C1.330.v2.A.SL1-1	350	1373	626	3931	616	7212	3.93876	19.9341	6.94084	44.1879	6.93757	100.732	5.06101	6.36636	14.5197	Q09116	sp|Q09116|SPN2_SCHPO Septin homolog spn2 OS=Schizosaccharomyces pombe (strain 972 / ATCC 24843) GN=spn2 PE=1 SV=2	0.38
KH.C1.1266.v1.A.ND1-1	11	133	22	111	19	222	0.251308	3.92013	0.495203	2.53306	0.434413	6.29486	15.5989	5.1152	14.4905	Q6FJ97	sp|Q6FJ97|U508_CANGA UPF0508 protein CAGL0M08074g OS=Candida glabrata (strain ATCC 2001 / CBS 138 / JCM 3761 / NBRC 0622 / NRRL Y-65) GN=CAGL0M08074g PE=3 SV=1	3.5
KH.L144.11.v1.A.SL1-1	99	293	32	188	38	443	2.88769	11.026	0.919626	5.47749	1.10926	16.0375	3.81827	5.95621	14.4578	Q0V9G5	sp|Q0V9G5|UBP44_XENTR Ubiquitin carboxyl-terminal hydrolase 44 OS=Xenopus tropicalis GN=usp44 PE=2 SV=1	6.2
KH.C12.9.v1.A.SL1-1	33	102	18	116	31	360	0.548712	2.18809	0.294883	1.92663	0.515855	7.42937	3.98768	6.53353	14.402	Q6DDL7	sp|Q6DDL7|UN93A_XENLA Protein unc-93 homolog A OS=Xenopus laevis GN=unc93a PE=2 SV=1	1e-37
KH.C14.429.v1.C.SL1-1	27	135	29	179	23	261	0.889332	5.73678	0.941119	5.88928	0.758164	10.6699	6.45066	6.25774	14.0733	Q8BSL4	sp|Q8BSL4|HS3S5_MOUSE Heparan sulfate glucosamine 3-O-sulfotransferase 5 OS=Mus musculus GN=Hs3st5 PE=2 SV=1	9e-08
KH.C4.129.v1.A.ND1-1	209	467	418	1387	275	3117	5.68058	16.3756	11.1936	37.6558	7.48022	105.148	2.88274	3.36405	14.0568	Q566D0	sp|Q566D0|UPK1B_RAT Uroplakin-1b OS=Rattus norvegicus GN=Upk1b PE=2 SV=3	8e-06
KH.C7.501.v2.A.SL1-1	494	1622	561	4065	498	5643	19.1286	81.0292	21.4026	157.227	19.2984	271.197	4.23602	7.34616	14.0528	P07797	sp|P07797|FRI3_LITCT Ferritin, lower subunit OS=Lithobates catesbeiana PE=1 SV=1	6e-06
KH.C9.417.v1.A.SL1-1	112	999	88	1614	137	1526	0.888617	10.2258	0.687901	12.7911	1.08781	15.0269	11.5075	18.5944	13.8139	Q6V0I7	sp|Q6V0I7|FAT4_HUMAN Protocadherin Fat 4 OS=Homo sapiens GN=FAT4 PE=1 SV=2	3e-12
KH.C3.654.v1.A.SL1-1	3	155	9	176	19	209	0.0658299	4.38802	0.194577	3.85766	0.417245	5.69203	66.6569	19.8259	13.6419	Q91ZV3	sp|Q91ZV3|DCBD2_MOUSE Discoidin, CUB and LCCL domain-containing protein 2 OS=Mus musculus GN=Dcbld2 PE=2 SV=1	0.37
KH.C12.510.v1.A.ND1-1	33	245	33	1020	65	710	1.99629	19.1209	1.96684	61.6337	3.93512	53.3072	9.57826	31.3364	13.5465	Q19VA1	sp|Q19VA1|RR2_CHLAT 30S ribosomal protein S2, chloroplastic OS=Chlorokybus atmophyticus GN=rps2 PE=3 SV=2	0.21
KH.C13.129.v1.B.SL1-1	96	265	55	599	72	782	0.404635	1.44103	0.228403	2.5219	0.303711	4.09089	3.5613	11.0415	13.4697	P0C6B8	sp|P0C6B8|SVEP1_RAT Sushi, von Willebrand factor type A, EGF and pentraxin domain-containing protein 1 OS=Rattus norvegicus GN=Svep1 PE=1 SV=1	4e-24
KH.C7.569.v1.A.ND1-1	44	148	27	206	34	368	0.753371	3.26928	0.455477	3.52316	0.5826	7.82029	4.33954	7.7351	13.4231	Q8IVV2	sp|Q8IVV2|LOXH1_HUMAN Lipoxygenase homology domain-containing protein 1 OS=Homo sapiens GN=LOXHD1 PE=2 SV=3	0.001
KH.C1.993.v1.A.ND1-1	64	190	37	379	43	457	0.239758	0.918294	0.136566	1.41822	0.161212	2.12485	3.83008	10.3848	13.1805	Q4LDE5	sp|Q4LDE5|SVEP1_HUMAN Sushi, von Willebrand factor type A, EGF and pentraxin domain-containing protein 1 OS=Homo sapiens GN=SVEP1 PE=1 SV=3	1e-22
KH.C10.5.v1.A.SL1-1	37	101	32	244	24	242	0.377078	1.32796	0.321312	2.48387	0.24478	3.06101	3.52171	7.73041	12.5051	Q01484	sp|Q01484|ANK2_HUMAN Ankyrin-2 OS=Homo sapiens GN=ANK2 PE=1 SV=4	3e-06
KH.C8.51.v1.A.ND1-1	73	136	85	250	57	572	1.40373	3.37392	1.61038	4.80188	1.09691	13.6514	2.40353	2.98183	12.4453	A2VDD2	sp|A2VDD2|TC1DB_XENLA Tctex1 domain-containing protein 1-B (Fragment) OS=Xenopus laevis GN=tctex1d1-b PE=2 SV=1	7e-25
KH.C8.369.v1.A.ND1-1	307	574	59	828	63	625	3.37664	8.14503	0.639359	9.09673	0.693461	8.53189	2.41217	14.2279	12.3033	P55862	sp|P55862|MCM5A_XENLA DNA replication licensing factor mcm5-A OS=Xenopus laevis GN=mcm5-a PE=1 SV=2	0
KH.S691.2.v1.B.ND1-1	101	449	60	433	78	770	1.31786	7.55838	0.77134	5.64345	1.01854	12.4697	5.73534	7.31643	12.2428	O88871	sp|O88871|GABR2_RAT Gamma-aminobutyric acid type B receptor subunit 2 OS=Rattus norvegicus GN=Gabbr2 PE=1 SV=2	0.097
KH.S1524.1.v1.A.SL1-1	66	130	72	423	20	194	0.656698	1.66878	0.705831	4.20408	0.199153	2.39576	2.54117	5.95621	12.0297	P20847	sp|P20847|GUN1_BUTFI Endoglucanase 1 OS=Butyrivibrio fibrisolvens GN=end1 PE=3 SV=1	1.4
KH.L24.29.v1.A.ND1-1	87	148	81	237	50	484	2.4218	5.31514	2.22152	6.58986	1.39291	16.7218	2.19471	2.96637	12.0049	Q99JL1	sp|Q99JL1|SPEF1_MOUSE Sperm flagellar protein 1 OS=Mus musculus GN=Spef1 PE=2 SV=1	7e-28
KH.C2.101.v2.A.SL3-1	43	304	49	295	32	308	0.433396	3.95298	0.486586	2.96994	0.322777	3.85289	9.12094	6.10363	11.9367	Q5R4J5	sp|Q5R4J5|SYT1_PONAB Synaptotagmin-1 OS=Pongo abelii GN=SYT1 PE=2 SV=1	8e-90
KH.L173.2.v1.A.nonSL4-1	53	155	36	313	50	480	1.13107	4.26755	0.75694	6.67215	1.06787	12.7137	3.77303	8.81463	11.9057	Q62920	sp|Q62920|PDLI5_RAT PDZ and LIM domain protein 5 OS=Rattus norvegicus GN=Pdlim5 PE=1 SV=2	2e-31
KH.L31.3.v3.A.ND2-1	72	163	50	185	45	427	0.862382	2.51878	0.590043	2.21334	0.539406	6.34767	2.92072	3.75115	11.7679	Q9BYV2	sp|Q9BYV2|TRI54_HUMAN Tripartite motif-containing protein 54 OS=Homo sapiens GN=TRIM54 PE=1 SV=3	2e-60
KH.C7.521.v1.A.ND1-1	23	117	32	111	51	481	0.399305	2.62058	0.54736	1.9249	0.886099	10.3643	6.56285	3.5167	11.6966	P14417	sp|P14417|APOA_MACMU Apolipoprotein(a) (Fragment) OS=Macaca mulatta GN=LPA PE=2 SV=1	1e-34
KH.C11.332.v1.A.SL1-1	121	258	124	388	61	566	0.246905	0.679201	0.249294	0.790833	0.124569	1.43344	2.75086	3.17229	11.5072	Q92736	sp|Q92736|RYR2_HUMAN Ryanodine receptor 2 OS=Homo sapiens GN=RYR2 PE=1 SV=3	0
KH.C12.301.v1.A.SL1-1	67	534	103	794	96	872	0.716149	7.36383	1.08471	8.4773	1.02692	11.5681	10.2826	7.8153	11.2649	Q8BFR2	sp|Q8BFR2|FSTL5_MOUSE Follistatin-related protein 5 OS=Mus musculus GN=Fstl5 PE=2 SV=1	6e-26
KH.C4.319.v1.R.ND3-1	30	113	46	276	19	170	0.388024	1.8856	0.586195	3.56579	0.245939	2.72901	4.8595	6.08294	11.0963	P49221	sp|P49221|TGM4_HUMAN Protein-glutamine gamma-glutamyltransferase 4 OS=Homo sapiens GN=TGM4 PE=1 SV=2	2e-62
KH.C4.428.v1.A.SL2-1	27	181	23	185	29	257	0.259434	2.24376	0.21774	1.7756	0.278867	3.06489	8.64867	8.15467	10.9905	A2AVA0	sp|A2AVA0|SVEP1_MOUSE Sushi, von Willebrand factor type A, EGF and pentraxin domain-containing protein 1 OS=Mus musculus GN=Svep1 PE=1 SV=1	2e-14
KH.C11.206.v1.A.SL1-1	70	138	172	714	87	760	1.5625	3.97406	3.78265	15.9195	1.94346	21.0549	2.5434	4.20855	10.8337	P52787	sp|P52787|IF_MOUSE Gastric intrinsic factor OS=Mus musculus GN=Gif PE=2 SV=2	0.041
KH.C11.186.v2.A.SL1-1	197	371	84	574	114	990	1.16876	2.83966	0.491002	3.40156	0.676859	7.28974	2.42964	6.9278	10.7699	Q90Y54	sp|Q90Y54|JAG1B_DANRE Protein jagged-1b OS=Danio rerio GN=jag1b PE=2 SV=1	6e-107
KH.L46.1.v1.A.nonSL5-1	134	281	75	561	42	360	2.73038	7.38683	1.50565	11.418	0.856451	9.10414	2.70543	7.5834	10.6301	Q5E951	sp|Q5E951|TBCB_BOVIN Tubulin-folding cofactor B OS=Bos taurus GN=TBCB PE=2 SV=1	1e-32
KH.L172.20.v1.A.ND1-1	38	121	11	238	55	466	0.604069	2.48155	0.172283	3.77911	0.874987	9.19407	4.10805	21.9355	10.5077	P50133	sp|P50133|PTH1R_PIG Parathyroid hormone/parathyroid hormone-related peptide receptor OS=Sus scrofa GN=PTH1R PE=2 SV=1	1e-70
KH.C11.158.v1.A.ND1-1	114	198	230	780	74	622	1.24375	2.78693	2.4723	8.50023	0.807968	8.42241	2.24076	3.43818	10.4242	Q6NVP8	sp|Q6NVP8|FUT8_XENTR Alpha-(1,6)-fucosyltransferase OS=Xenopus tropicalis GN=fut8 PE=2 SV=1	1e-81
KH.L9.43.v1.A.SL2-1	136	252	72	383	101	847	1.60544	3.83788	0.837404	4.5161	1.1932	12.4096	2.39054	5.39298	10.4003	Q61086	sp|Q61086|FZD3_MOUSE Frizzled-3 OS=Mus musculus GN=Fzd3 PE=1 SV=1	3e-48
KH.S643.6.v1.B.SL1-1	856	2290	511	2363	565	4695	21.4474	74.0236	12.6144	59.1389	14.1672	146.001	3.45141	4.68819	10.3055	0	0	0
KH.L133.2.v1.A.ND1-1	58	248	58	335	84	687	0.893231	4.92745	0.880056	5.15335	1.29464	13.1314	5.51643	5.85571	10.1429	Q03431	sp|Q03431|PTH1R_HUMAN Parathyroid hormone/parathyroid hormone-related peptide receptor OS=Homo sapiens GN=PTH1R PE=1 SV=1	3e-76
KH.C1.327.v1.A.ND1-1	106	255	125	534	84	685	1.80105	5.58979	2.09256	9.06298	1.42835	14.4454	3.10362	4.33106	10.1133	Q65946	sp|Q65946|DPOL_ADECC DNA polymerase OS=Canine adenovirus serotype 1 (strain CLL) GN=POL PE=3 SV=1	3.1
KH.C11.374.v1.A.ND1-1	11	145	16	119	25	202	0.196682	3.34484	0.281864	2.12534	0.447351	4.48273	17.0063	7.54031	10.0206	O54853	sp|O54853|KCNH6_RAT Potassium voltage-gated channel subfamily H member 6 OS=Rattus norvegicus GN=Kcnh6 PE=1 SV=1	3e-83
KH.L108.4.v4.A.SL2-1	327	645	386	1526	141	1133	3.54026	9.00911	4.11738	16.5026	1.52771	15.2243	2.54476	4.00802	9.96539	A1L224	sp|A1L224|CR3L2_DANRE Cyclic AMP-responsive element-binding protein 3-like protein 2 OS=Danio rerio GN=creb3l2 PE=2 SV=1	8e-21
KH.S164.12.v1.A.SL1-1	87	142	33	172	51	408	0.899318	1.89373	0.336089	1.77595	0.527594	5.23448	2.10573	5.28417	9.92141	Q04892	sp|Q04892|SOX14_MOUSE Transcription factor SOX-14 OS=Mus musculus GN=Sox14 PE=2 SV=2	9e-33
KH.C9.656.v1.A.SL1-1	65	368	70	970	97	773	1.38147	10.0904	1.46579	20.5925	2.06317	20.3904	7.30414	14.0487	9.88305	Q7VRS7	sp|Q7VRS7|UREF_BLOFL Urease accessory protein UreF OS=Blochmannia floridanus GN=ureF PE=3 SV=1	7.7
KH.C4.394.v1.A.SL1-1	138	320	153	519	128	1007	2.35895	7.05706	2.57678	8.86167	2.1897	21.3643	2.99161	3.43905	9.7567	Q9BUZ4	sp|Q9BUZ4|TRAF4_HUMAN TNF receptor-associated factor 4 OS=Homo sapiens GN=TRAF4 PE=1 SV=1	5e-90
KH.C9.518.v1.A.SL2-1	34	176	40	265	26	204	0.289799	1.93537	0.335911	2.25617	0.221782	2.15807	6.67833	6.71658	9.73061	Q9Y5I4	sp|Q9Y5I4|PCDC2_HUMAN Protocadherin alpha-C2 OS=Homo sapiens GN=PCDHAC2 PE=2 SV=1	4e-11
KH.C11.667.v1.A.SL3-1	117	192	54	542	126	984	8.2121	17.3862	3.73429	37.9994	8.85063	85.72	2.11714	10.1758	9.68518	0	0	0
KH.L129.9.v1.C.SL1-1	84	136	34	190	16	124	0.648267	1.35409	0.258524	1.46466	0.123575	1.18772	2.08879	5.66549	9.61136	Q9Y0X6	sp|Q9Y0X6|YA_MESMA BmK-YA precursor OS=Mesobuthus martensii GN=YA PE=1 SV=2	1.5
KH.C11.489.v1.A.SL2-1	26	120	49	273	28	216	0.191845	1.14233	0.356221	2.0121	0.206762	1.97811	5.95446	5.64845	9.56707	Q96RW7	sp|Q96RW7|HMCN1_HUMAN Hemicentin-1 OS=Homo sapiens GN=HMCN1 PE=1 SV=2	3e-13
KH.C5.352.v2.A.ND1-1	58	102	26	199	44	337	0.459239	1.04195	0.202829	1.57389	0.348658	3.31177	2.26885	7.75965	9.49862	Q9UKN7	sp|Q9UKN7|MYO15_HUMAN Unconventional myosin-XV OS=Homo sapiens GN=MYO15A PE=1 SV=2	2e-07
KH.L154.9.v1.A.ND1-2	11	100	6	101	26	198	0.514331	6.03233	0.276406	4.71716	1.21663	11.4904	11.7285	17.066	9.44442	0	0	0
KH.L119.10.v1.B.SL1-1	95	278	169	698	62	472	0.869817	3.28385	1.52454	6.38364	0.568109	5.36371	3.77534	4.18727	9.44134	O94985	sp|O94985|CSTN1_HUMAN Calsyntenin-1 OS=Homo sapiens GN=CLSTN1 PE=1 SV=1	7e-21
KH.S115.31.v1.A.ND1-1	45	139	93	226	37	279	0.792308	3.15741	1.61328	3.97465	0.651956	6.09683	3.98508	2.4637	9.3516	O95704	sp|O95704|APBB3_HUMAN Amyloid beta A4 precursor protein-binding family B member 3 OS=Homo sapiens GN=APBB3 PE=1 SV=2	9.9
KH.C8.821.v2.A.SL2-1	17	172	9	466	79	592	3.18429	41.5649	1.66094	87.1884	14.809	137.627	13.0531	52.4935	9.29347	0	0	0
KH.L170.16.v2.B.ND1-1	158	325	89	512	114	854	1.71836	4.56011	0.953662	5.56207	1.24079	11.5275	2.65375	5.83233	9.29044	Q8BN59	sp|Q8BN59|LARP6_MOUSE La-related protein 6 OS=Mus musculus GN=Larp6 PE=1 SV=1	1e-08
KH.C11.428.v1.B.SL1-1	123	429	213	1134	185	1384	0.764446	3.4398	1.30427	7.03985	1.15066	10.6757	4.49973	5.39754	9.27786	Q9JI18	sp|Q9JI18|LRP1B_MOUSE Low-density lipoprotein receptor-related protein 1B OS=Mus musculus GN=Lrp1b PE=1 SV=1	1e-14
KH.C9.187.v2.A.SL2-1	174	501	135	720	213	1591	1.06084	3.94071	0.810928	4.38473	1.29962	12.039	3.71469	5.40706	9.26347	P39060	sp|P39060|COIA1_HUMAN Collagen alpha-1(XVIII) chain OS=Homo sapiens GN=COL18A1 PE=1 SV=5	5e-26
KH.C11.2.v1.A.SL1-1	39	126	27	106	27	201	1.59141	6.63318	1.08549	4.32048	1.1026	10.1796	4.16812	3.9802	9.23242	P63255	sp|P63255|CRIP1_RAT Cysteine-rich protein 1 OS=Rattus norvegicus GN=Crip1 PE=1 SV=2	4e-17
KH.C6.145.v1.A.ND1-1	70	461	67	320	69	509	0.671777	5.70772	0.633502	3.06751	0.662692	6.06267	8.49645	4.84214	9.14855	Q91713	sp|Q91713|CHRD_XENLA Chordin OS=Xenopus laevis GN=chrd PE=1 SV=1	2e-34
KH.L108.28.v1.A.SL1-1	17	104	18	164	22	158	0.27806	2.19461	0.290074	2.67943	0.360121	3.20749	7.89258	9.23706	8.90672	Q9BXJ3	sp|Q9BXJ3|C1QT4_HUMAN Complement C1q tumor necrosis factor-related protein 4 OS=Homo sapiens GN=C1QTNF4 PE=1 SV=2	1e-17
KH.C9.78.v1.A.SL1-1	41	138	75	208	35	250	0.542485	2.35569	0.977714	2.74901	0.463455	4.10547	4.3424	2.81167	8.8584	Q11126	sp|Q11126|FUT3_BOVIN Galactoside 3(4)-L-fucosyltransferase OS=Bos taurus GN=FUT3 PE=2 SV=2	2e-11
KH.C7.211.v1.C.SL1-2	289	1061	340	1423	379	2697	2.1426	10.1483	2.48353	10.538	2.81202	24.8167	4.73644	4.24315	8.82521	Q9WX61	sp|Q9WX61|BCSA3_GLUXY Cellulose synthase 1 catalytic subunit [UDP-forming] OS=Gluconacetobacter xylinus GN=bcsAI PE=3 SV=1	3e-05
KH.C7.288.v3.C.nonSL3-1	126	309	196	1033	271	1925	5.08146	16.0772	7.7879	41.6128	10.9376	96.3534	3.1639	5.34326	8.80937	Q63072	sp|Q63072|BST1_RAT ADP-ribosyl cyclase 2 OS=Rattus norvegicus GN=Bst1 PE=2 SV=1	1.8
KH.C10.61.v2.A.SL1-1	322	768	202	886	130	906	3.01935	9.2908	1.86619	8.29851	1.21993	10.544	3.07709	4.44677	8.64307	P49657	sp|P49657|MNB_DROME Serine/threonine-protein kinase minibrain OS=Drosophila melanogaster GN=mnb PE=2 SV=2	1e-132
KH.C8.24.v1.A.SL1-1	232	1039	285	2793	387	2668	3.41559	19.7346	4.13399	41.0731	5.70197	48.7509	5.77779	9.93547	8.54984	Q14112	sp|Q14112|NID2_HUMAN Nidogen-2 OS=Homo sapiens GN=NID2 PE=1 SV=3	0.005
KH.C12.322.v1.A.ND1-1	56	132	83	239	38	258	0.629518	1.91438	0.919273	2.68366	0.427503	3.59963	3.04103	2.91932	8.42014	P0C6U3	sp|P0C6U3|R1A_CVHN1 Replicase polyprotein 1a OS=Human coronavirus HKU1 (isolate N1) GN=1a PE=1 SV=1	0.23
KH.L154.31.v2.A.nonSL2-2	35	306	23	317	27	183	0.973416	10.9796	0.630238	8.8064	0.751501	6.31684	11.2794	13.9731	8.40564	P84239	sp|P84239|H3_URECA Histone H3 OS=Urechis caupo PE=1 SV=2	2e-62
KH.C9.313.v2.A.SL2-1	618	1067	924	2097	997	6725	6.39464	14.2438	9.41989	21.6738	10.3242	86.3652	2.22746	2.30085	8.36528	Q6TFL4	sp|Q6TFL4|KLH24_HUMAN Kelch-like protein 24 OS=Homo sapiens GN=KLHL24 PE=2 SV=1	8e-108
KH.C11.279.v1.A.ND1-1	44	156	55	406	63	424	0.869201	3.97582	1.07047	8.01129	1.2455	10.3957	4.57411	7.48386	8.34658	O43529	sp|O43529|CHSTA_HUMAN Carbohydrate sulfotransferase 10 OS=Homo sapiens GN=CHST10 PE=1 SV=1	1e-05
KH.C10.366.v2.A.SL1-1	390	624	386	1673	274	1830	5.10806	10.5441	4.9811	21.8875	3.59151	29.7482	2.06421	4.39411	8.28293	A4IHK6	sp|A4IHK6|LAT4_XENTR Large neutral amino acids transporter small subunit 4 OS=Xenopus tropicalis GN=slc43a2 PE=2 SV=1	2e-39
KH.C10.457.v2.A.SL2-1	107	440	334	842	92	607	1.6341	8.66925	5.02559	12.8444	1.4061	11.5054	5.30522	2.55581	8.18247	Q28019	sp|Q28019|LTBP2_BOVIN Latent-transforming growth factor beta-binding protein 2 OS=Bos taurus GN=LTBP2 PE=2 SV=2	2e-27
KH.C10.127.v1.B.SL1-1	53	150	72	434	50	323	0.335771	1.22601	0.449414	2.74641	0.31701	2.53974	3.65132	6.1111	8.01154	Q96RW7	sp|Q96RW7|HMCN1_HUMAN Hemicentin-1 OS=Homo sapiens GN=HMCN1 PE=1 SV=2	1e-19
KH.L170.25.v1.A.SL1-1	46	230	105	845	141	910	0.978993	6.31516	2.2017	17.9634	3.00315	24.0371	6.45066	8.15887	8.00397	P07898	sp|P07898|PGCA_CHICK Aggrecan core protein OS=Gallus gallus GN=ACAN PE=1 SV=2	2
KH.C2.846.v2.A.ND2-1	92	221	49	297	48	308	0.881275	2.73118	0.462451	2.84177	0.460151	3.66179	3.09912	6.14501	7.9578	Q5TJE8	sp|Q5TJE8|B3GT4_CANFA Beta-1,3-galactosyltransferase 4 OS=Canis familiaris GN=B3GALT4 PE=3 SV=1	0.001
KH.C6.147.v3.B.ND3-1	36	105	40	162	35	221	0.358085	1.34743	0.392003	1.60956	0.348407	2.72831	3.76289	4.10599	7.83083	Q5RAL3	sp|Q5RAL3|GRM3_PONAB Metabotropic glutamate receptor 3 OS=Pongo abelii GN=GRM3 PE=2 SV=1	1e-14
KH.C12.469.v1.A.ND1-1	17	117	13	236	25	156	0.241146	2.14117	0.181686	3.34389	0.354901	2.74647	8.87915	18.4048	7.7387	P11344	sp|P11344|TYRO_MOUSE Tyrosinase OS=Mus musculus GN=Tyr PE=1 SV=3	9e-40
KH.C5.13.v1.A.SL2-1	4	138	14	210	75	466	0.0553022	2.46148	0.190703	2.90009	1.03772	7.99627	44.5096	15.2074	7.70563	Q9QWJ9	sp|Q9QWJ9|NRP1_RAT Neuropilin-1 OS=Rattus norvegicus GN=Nrp1 PE=1 SV=1	0.0006
KH.C5.200.v1.A.ND1-1	254	541	446	1605	130	793	1.32114	3.63034	2.28559	8.33873	0.676698	5.11927	2.74788	3.6484	7.56507	Q9W0Y8	sp|Q9W0Y8|SCN60_DROME Sodium channel protein 60E OS=Drosophila melanogaster GN=NaCP60E PE=2 SV=5	5e-75
KH.C10.274.v2.A.SL4-1	104	317	75	999	48	289	1.80656	7.10416	1.28359	17.3338	0.834441	6.23068	3.93242	13.5041	7.46689	Q90773	sp|Q90773|CEPU1_CHICK Protein CEPU-1 OS=Gallus gallus PE=1 SV=1	0.047
KH.C1.212.v1.A.SL1-1	774	2015	1046	4113	579	3482	8.65079	29.0552	11.5184	45.918	6.47633	48.3017	3.35868	3.98648	7.45819	A6X919	sp|A6X919|D19L1_MOUSE Probable C-mannosyltransferase DPY19L1 OS=Mus musculus GN=Dpy19l1 PE=2 SV=1	1e-59
KH.C2.411.v1.A.SL1-1	137	286	209	1088	324	1914	2.50726	6.75273	3.76853	19.8892	5.93416	43.475	2.69327	5.2777	7.32623	P25291	sp|P25291|GP2_CANFA Pancreatic secretory granule membrane major glycoprotein GP2 OS=Canis familiaris GN=GP2 PE=1 SV=1	0.9
KH.C1.1017.v1.A.SL1-1	311	497	202	434	120	705	2.25411	4.64735	1.44249	3.14205	0.870425	6.34195	2.06172	2.17822	7.28603	P35331	sp|P35331|NRCAM_CHICK Neuronal cell adhesion molecule OS=Gallus gallus PE=1 SV=1	2e-12
KH.C13.116.v1.A.nonSL3-1	66	209	50	205	82	480	0.370363	1.51309	0.27644	1.14907	0.460504	3.34306	4.08542	4.15668	7.25957	P20909	sp|P20909|COBA1_RAT Collagen alpha-1(XI) chain OS=Rattus norvegicus GN=Col11a1 PE=1 SV=2	5e-25
KH.L128.12.v1.A.SL1-1	0	197	4	141	18	105	0	5.0658	0.0785514	2.80721	0.35905	2.5975	#DIV/0!	35.7373	7.23436	P50219	sp|P50219|MNX1_HUMAN Motor neuron and pancreas homeobox protein 1 OS=Homo sapiens GN=MNX1 PE=1 SV=3	2e-19
KH.C4.537.v1.R.ND1-1	71	116	32	189	18	105	0.902556	1.90243	0.400786	2.39986	0.228994	1.65662	2.10782	5.9879	7.23436	Q8BRC6	sp|Q8BRC6|MAAT1_MOUSE Protein MAATS1 OS=Mus musculus GN=Maats1 PE=2 SV=3	8e-97
KH.L158.1.v1.A.SL1-1	162	282	121	311	113	656	1.20276	2.70115	0.88511	2.3064	0.839613	6.04489	2.24579	2.60578	7.19961	P30337	sp|P30337|CHIN_RAT N-chimaerin OS=Rattus norvegicus GN=Chn1 PE=1 SV=2	6e-54
KH.C14.587.v1.B.SL2-1	127	223	204	636	92	531	1.15837	2.62412	1.83325	5.79443	0.839786	6.01116	2.26535	3.16074	7.15797	P06678	sp|P06678|ZEAA_MAIZE Zein-alpha 19D1 OS=Zea mays PE=2 SV=1	1.5
KH.C7.768.v1.A.ND1-1	82	177	69	272	61	352	2.75344	7.66776	2.28274	9.12303	2.04987	14.6697	2.7848	3.99652	7.15643	Q6A7P7	sp|Q6A7P7|DAPB_PROAC 4-hydroxy-tetrahydrodipicolinate reductase OS=Propionibacterium acnes (strain KPA171202 / DSM 16379) GN=dapB PE=3 SV=1	1.2
KH.L172.12.v5.A.SL6-1	128	226	79	169	37	213	7.04423	16.046	4.28348	9.29008	2.0378	14.5486	2.27789	2.16881	7.13939	P49030	sp|P49030|MGN_ORYSJ Protein mago nashi homolog OS=Oryza sativa subsp. japonica GN=Os12g0287200 PE=2 SV=2	4e-22
KH.C5.240.v1.B.SL1-1	361	889	820	3305	443	2539	2.62938	8.35376	5.88445	24.0451	3.22913	22.9524	3.17709	4.0862	7.10792	Q29485	sp|Q29485|PLMN_ERIEU Plasminogen OS=Erinaceus europaeus GN=PLG PE=2 SV=1	8e-12
KH.S406.12.v1.A.ND1-1	40	105	48	212	28	160	0.772034	2.61457	0.912776	4.08716	0.540842	3.83279	3.3866	4.47772	7.08672	Q5VZ66	sp|Q5VZ66|JKIP3_HUMAN Janus kinase and microtubule-interacting protein 3 OS=Homo sapiens GN=JAKMIP3 PE=2 SV=2	0.045
KH.L18.74.v2.A.ND1-1	57	207	117	314	110	628	0.695581	3.25895	1.40671	3.82746	1.34339	9.51155	4.68522	2.72086	7.08028	Q32TF8	sp|Q32TF8|EFHC2_DANRE EF-hand domain-containing family member C2 OS=Danio rerio GN=efhc2 PE=2 SV=2	4e-131
KH.C12.228.v1.A.SL1-1	37	147	17	255	96	545	0.713246	3.65586	0.322874	4.91006	1.85201	13.0393	5.12566	15.2074	7.04058	B2TLZ8	sp|B2TLZ8|DNAJ_CLOBB Chaperone protein DnaJ OS=Clostridium botulinum (strain Eklund 17B / Type B) GN=dnaJ PE=3 SV=1	1.8
KH.S1219.2.v1.B.ND2-1	31	122	16	210	54	301	1.1974	6.07954	0.608895	8.10223	2.0874	14.4298	5.0773	13.3064	6.91283	0	0	0
KH.C11.390.v1.A.ND1-1	324	1021	319	2776	432	2379	5.72732	23.2845	5.55576	49.0156	7.64232	52.1939	4.06551	8.82249	6.82958	Q96RW7	sp|Q96RW7|HMCN1_HUMAN Hemicentin-1 OS=Homo sapiens GN=HMCN1 PE=1 SV=2	6e-07
KH.C14.227.v1.B.SL2-1	1538	3075	1465	4558	1220	6670	53.6122	138.289	50.3143	158.705	42.5601	288.57	2.57943	3.15427	6.78031	P35564	sp|P35564|CALX_MOUSE Calnexin OS=Mus musculus GN=Canx PE=1 SV=1	4.8
KH.C6.128.v1.A.SL2-1	390	797	513	1196	285	1539	4.66226	12.2921	6.04221	14.2814	3.40967	22.8344	2.6365	2.36361	6.69695	Q7TSY6	sp|Q7TSY6|CELF4_MOUSE CUGBP Elav-like family member 4 OS=Mus musculus GN=Celf4 PE=1 SV=2	5e-59
KH.C7.629.v1.A.SL1-1	67	144	62	172	59	313	0.618183	1.71411	0.563612	1.58518	0.544791	3.58431	2.77282	2.81254	6.57924	O18920	sp|O18920|ANGP1_BOVIN Angiopoietin-1 OS=Bos taurus GN=ANGPT1 PE=2 SV=3	9e-18
KH.C13.28.v2.B.SL2-1	28	151	28	108	49	259	0.350351	2.43757	0.345184	1.34983	0.613589	4.02221	6.9575	3.91046	6.55522	Q9PLA4	sp|Q9PLA4|GLMS_CHLMU Glutamine--fructose-6-phosphate aminotransferase [isomerizing] OS=Chlamydia muridarum (strain MoPn / Nigg) GN=glmS PE=3 SV=3	2.7
KH.C2.248.v1.A.SL1-1	235	908	387	1814	295	1536	2.71032	13.5105	4.39754	20.8977	3.40494	21.9868	4.98485	4.75214	6.45732	Q5ZLD3	sp|Q5ZLD3|KLH13_CHICK Kelch-like protein 13 OS=Gallus gallus GN=KLHL13 PE=2 SV=1	2e-69
KH.S793.2.v1.A.SL3-1	55	108	19	217	37	191	2.00018	5.06715	0.680779	7.88269	1.34661	8.62101	2.53335	11.5789	6.40199	P07942	sp|P07942|LAMB1_HUMAN Laminin subunit beta-1 OS=Homo sapiens GN=LAMB1 PE=1 SV=2	0.26
KH.C14.501.v1.A.SL1-1	539	1110	583	2815	372	1905	6.20722	16.4917	6.6149	32.3814	4.28733	27.2284	2.65686	4.89522	6.3509	A1L3I3	sp|A1L3I3|F1712_XENLA Protein FAM171A2 OS=Xenopus laevis GN=fam171a2 PE=2 SV=1	3.2
KH.C7.281.v1.A.ND1-1	493	1603	674	2819	910	4659	5.62539	23.5979	7.57726	32.1299	10.3916	65.9807	4.19489	4.24031	6.34943	A7Y2W8	sp|A7Y2W8|SC6A9_XENLA Sodium- and chloride-dependent glycine transporter 1 OS=Xenopus laevis GN=slc6a9 PE=2 SV=1	1e-66
KH.C5.309.v1.A.ND2-2	299	725	308	806	714	3644	4.80714	15.0379	4.8788	12.9437	11.4881	72.7131	3.12825	2.65306	6.32941	Q4V8D1	sp|Q4V8D1|CP2U1_RAT Cytochrome P450 2U1 OS=Rattus norvegicus GN=Cyp2u1 PE=1 SV=1	1e-31
KH.C8.755.v1.A.nonSL3-1	76	121	29	118	34	173	1.55264	3.18917	0.583716	2.40795	0.695139	4.38654	2.05403	4.12521	6.31031	Q5SCW3	sp|Q5SCW3|YCF2_HUPLU Protein ycf2 OS=Huperzia lucidula GN=ycf2 PE=3 SV=1	8.7
KH.C12.84.v1.B.SL2-1	76	143	76	291	32	160	0.942985	2.28908	0.929076	3.60656	0.397353	2.46394	2.42749	3.88188	6.20088	E7FAM5	sp|E7FAM5|LIN41_DANRE E3 ubiquitin-protein ligase TRIM71 OS=Danio rerio GN=trim71 PE=2 SV=1	1e-09
KH.C5.580.v1.A.ND1-1	41	121	115	434	39	194	0.667107	2.53998	1.84355	7.05359	0.635055	3.91771	3.80746	3.82608	6.16908	Q9N0W2	sp|Q9N0W2|FUT8_BOVIN Alpha-(1,6)-fucosyltransferase OS=Bos taurus GN=FUT8 PE=2 SV=1	8e-22
KH.C9.174.v1.A.ND1-1	96	398	59	440	93	461	3.01819	16.1433	1.82757	13.8178	2.92613	17.9885	5.34868	7.56072	6.14754	P07898	sp|P07898|PGCA_CHICK Aggrecan core protein OS=Gallus gallus GN=ACAN PE=1 SV=2	0.37
KH.C10.75.v1.A.ND1-1	150	243	102	451	75	370	4.70641	9.83647	3.15315	14.1346	2.35502	14.4085	2.09002	4.48269	6.1182	Q3KQ77	sp|Q3KQ77|EFCB1_XENLA EF-hand calcium-binding domain-containing protein 1 OS=Xenopus laevis GN=efcab1 PE=2 SV=1	2e-48
KH.C10.423.v1.A.ND1-1	29	180	90	854	57	281	0.30546	2.44603	0.933995	8.98509	0.60085	3.67351	8.00772	9.62006	6.11385	P21941	sp|P21941|MATN1_HUMAN Cartilage matrix protein OS=Homo sapiens GN=MATN1 PE=1 SV=1	9e-12
KH.S663.4.v1.A.SL2-1	229	439	309	1417	339	1671	9.51932	23.5434	12.6554	58.8368	14.1028	86.2116	2.47322	4.64915	6.11308	Q9Y6I9	sp|Q9Y6I9|TX264_HUMAN Testis-expressed sequence 264 protein OS=Homo sapiens GN=TEX264 PE=1 SV=1	0.15
KH.C12.34.v1.A.SL1-1	3165	6455	3124	14850	2004	9863	17.3626	45.6849	16.8849	81.3725	11.0021	67.1537	2.63122	4.81923	6.10372	Q68FD5	sp|Q68FD5|CLH1_MOUSE Clathrin heavy chain 1 OS=Mus musculus GN=Cltc PE=1 SV=3	0
KH.C14.65.v3.R.ND3-1	154	359	121	589	54	261	1.19382	3.59044	0.924169	4.56083	0.418937	2.51119	3.00752	4.93506	5.99418	Q5DU00	sp|Q5DU00|DCDC2_MOUSE Doublecortin domain-containing protein 2 OS=Mus musculus GN=Dcdc2 PE=2 SV=2	1e-14
KH.C2.649.v1.A.ND2-1	163	264	69	255	89	430	3.09607	6.46937	1.29128	4.83807	1.6918	10.137	2.08954	3.74674	5.99186	Q95237	sp|Q95237|LYAM1_PANTR L-selectin OS=Pan troglodytes GN=SELL PE=2 SV=1	0.2
KH.L173.3.v1.B.ND2-1	41	101	67	165	54	260	0.392863	1.24857	0.632526	1.57925	0.517829	3.09207	3.17813	2.49673	5.97122	O15072	sp|O15072|ATS3_HUMAN A disintegrin and metalloproteinase with thrombospondin motifs 3 OS=Homo sapiens GN=ADAMTS3 PE=2 SV=4	2e-121
KH.C9.703.v1.A.nonSL2-1	116	205	178	399	71	341	1.45087	3.30795	2.1935	4.98486	0.88872	5.29351	2.27998	2.27256	5.95634	Q8BSN3	sp|Q8BSN3|CC151_MOUSE Coiled-coil domain-containing protein 151 OS=Mus musculus GN=Ccdc151 PE=2 SV=1	6e-13
KH.C1.508.v1.A.SL2-1	265	433	350	1654	82	392	3.01825	6.36256	3.92757	18.8171	0.934671	5.54133	2.10803	4.79104	5.92865	P07228	sp|P07228|ITB1_CHICK Integrin beta-1 OS=Gallus gallus GN=ITGB1 PE=1 SV=1	1e-69
KH.S1083.1.v1.A.ND1-1	59	140	30	173	61	287	1.40577	4.30352	0.704254	4.11734	1.45454	8.48716	3.06133	5.84638	5.83493	Q5HRE0	sp|Q5HRE0|Y253_STAEQ UPF0272 protein SERP0253 OS=Staphylococcus epidermidis (strain ATCC 35984 / RP62A) GN=SERP0253 PE=3 SV=1	0.26
KH.L108.10.v2.A.SL2-1	47	278	56	362	100	465	0.5238	3.99712	0.614897	4.02982	1.11533	6.43191	7.631	6.55365	5.76682	Q5ZLD3	sp|Q5ZLD3|KLH13_CHICK Kelch-like protein 13 OS=Gallus gallus GN=KLHL13 PE=2 SV=1	3e-55
KH.C2.170.v3.A.ND1-1	66	188	85	278	97	450	0.272679	1.00207	0.345998	1.14726	0.401065	2.30749	3.67492	3.3158	5.75339	Q9WTS6	sp|Q9WTS6|TEN3_MOUSE Teneurin-3 OS=Mus musculus GN=Tenm3 PE=1 SV=1	4e-91
KH.C12.486.v1.A.ND1-1	63	149	64	334	32	147	0.747102	2.27961	0.747766	3.95635	0.379774	2.16359	3.05127	5.29089	5.69706	Q5U243	sp|Q5U243|CLIP3_XENLA CAP-Gly domain-containing linker protein 3 OS=Xenopus laevis GN=clip3 PE=2 SV=1	9e-05
KH.L19.6.v1.A.nonSL2-1	101	357	165	570	195	892	0.855712	3.90219	1.37732	4.82381	1.65339	9.37972	4.56017	3.5023	5.67301	Q6GQF5	sp|Q6GQF5|TSN33_XENLA Tetraspanin-33 OS=Xenopus laevis GN=tspan33 PE=2 SV=1	0.0005
KH.C9.561.v1.A.SL2-1	78	156	75	249	61	279	0.912112	2.35349	0.864095	2.90845	0.71387	4.04927	2.58027	3.36589	5.67228	Q6XDT4	sp|Q6XDT4|IKZF_OIKDI Ikaros family zinc finger protein OS=Oikopleura dioica PE=2 SV=1	1e-49
KH.C3.418.v1.A.SL1-1	668	1125	672	1968	729	3299	9.79744	21.2874	9.71073	28.8317	10.7004	60.0534	2.17275	2.96906	5.61226	Q9Y4P8	sp|Q9Y4P8|WIPI2_HUMAN WD repeat domain phosphoinositide-interacting protein 2 OS=Homo sapiens GN=WIPI2 PE=1 SV=1	3e-91
KH.L167.5.v1.A.SL1-1	33	310	90	259	159	716	0.497619	6.03086	1.33713	3.90114	2.39947	13.4003	12.1194	2.91756	5.58469	A5PJX7	sp|A5PJX7|S6A13_BOVIN Sodium- and chloride-dependent GABA transporter 2 OS=Bos taurus GN=SLC6A13 PE=2 SV=1	3e-84
KH.S437.6.v1.A.SL1-1	194	303	182	432	194	872	2.29099	4.61634	2.11758	5.09582	2.29276	12.7808	2.015	2.40644	5.5744	0	0	0
KH.S691.3.v1.B.ND1-1	125	212	171	575	70	310	2.19837	4.81017	2.963	10.1011	1.23204	6.7666	2.18807	3.40906	5.49221	B4L0G9	sp|B4L0G9|KLHDB_DROMO Kelch-like protein diablo OS=Drosophila mojavensis GN=dbo PE=3 SV=1	5e-15
KH.C14.234.v1.A.SL1-1	3392	6526	5135	18881	2080	9169	20.1817	50.0938	30.1016	112.211	12.3852	67.7085	2.48214	3.72775	5.46691	B4LQ23	sp|B4LQ23|CLU_DROVI Protein clueless OS=Drosophila virilis GN=clu PE=3 SV=1	8e-134
KH.L73.2.v2.A.SL1-1	301	807	334	1761	364	1604	4.17635	14.4457	4.56587	24.4061	5.05437	27.6219	3.45893	5.34534	5.46495	P27590	sp|P27590|UROM_RAT Uromodulin OS=Rattus norvegicus GN=Umod PE=2 SV=1	2e-05
KH.C2.1050.v1.A.SL1-1	38	100	43	208	103	452	0.524671	1.7813	0.58495	2.86864	1.42323	7.7457	3.39509	4.90408	5.44233	Q4LDE5	sp|Q4LDE5|SVEP1_HUMAN Sushi, von Willebrand factor type A, EGF and pentraxin domain-containing protein 1 OS=Homo sapiens GN=SVEP1 PE=1 SV=3	0.52
KH.C4.516.v1.A.ND1-1	222	362	89	218	56	245	3.11779	6.559	1.23149	3.05816	0.787078	4.27051	2.10373	2.4833	5.42577	Q3SZZ2	sp|Q3SZZ2|XBP1_BOVIN X-box-binding protein 1 OS=Bos taurus GN=XBP1 PE=2 SV=1	5e-09
KH.C11.89.v1.A.nonSL5-1	99	213	87	211	67	293	0.726522	2.01664	0.629042	1.5467	0.492067	2.6687	2.77574	2.45881	5.42346	P10493	sp|P10493|NID1_MOUSE Nidogen-1 OS=Mus musculus GN=Nid1 PE=1 SV=2	5e-35
KH.C9.534.v2.A.ND1-1	575	1493	57	1130	291	1251	6.98939	23.4135	0.682642	13.7202	3.53997	18.8733	3.34986	20.0986	5.33148	P20305	sp|P20305|GELS_PIG Gelsolin (Fragment) OS=Sus scrofa GN=GSN PE=1 SV=1	4e-113
KH.C2.637.v1.A.ND1-1	165	317	149	414	143	607	1.98701	4.92504	1.76786	4.97995	1.7234	9.07242	2.47862	2.81693	5.26424	Q9N293	sp|Q9N293|B3GT5_GORGO Beta-1,3-galactosyltransferase 5 (Fragment) OS=Gorilla gorilla gorilla GN=B3GALT5 PE=3 SV=2	6e-09
KH.C10.99.v1.A.SL7-1	71	153	152	356	103	436	1.15102	3.19999	2.4278	5.76478	1.67108	8.77261	2.78015	2.37448	5.24968	Q86S40	sp|Q86S40|ADPGK_CAEEL Probable ADP-dependent glucokinase OS=Caenorhabditis elegans GN=C50D2.7 PE=1 SV=1	1e-05
KH.L130.10.v1.A.ND1-1	121	249	65	135	70	292	2.66454	7.0741	1.41025	2.96948	1.54266	7.98066	2.6549	2.10563	5.17331	Q9C8T7	sp|Q9C8T7|PP101_ARATH Pentatricopeptide repeat-containing protein At1g63330 OS=Arabidopsis thaliana GN=At1g63330 PE=2 SV=2	9.6
KH.C9.651.v1.A.ND1-1	75	185	96	193	45	186	1.4237	4.53069	1.79546	3.65952	0.854882	4.38218	3.18233	2.03821	5.12606	Q4V7B5	sp|Q4V7B5|CC105_RAT Coiled-coil domain-containing protein 105 OS=Rattus norvegicus GN=Ccdc105 PE=2 SV=1	2e-06
KH.C14.539.v1.A.SL1-1	943	2862	1111	4595	1996	8246	28.495	111.573	33.0763	138.692	60.3605	309.257	3.91555	4.19309	5.12349	0	0	0
KH.C10.70.v1.A.SL1-1	241	482	260	1018	114	467	2.95255	7.61837	3.13834	12.4577	1.39772	7.10095	2.58027	3.96951	5.08037	P42898	sp|P42898|MTHR_HUMAN Methylenetetrahydrofolate reductase OS=Homo sapiens GN=MTHFR PE=1 SV=3	2e-149
KH.C10.172.v2.A.SL1-1	32	200	74	494	109	438	0.301058	2.42753	0.685928	4.64233	1.02627	5.11439	8.06333	6.76796	4.98346	Q7TSU7	sp|Q7TSU7|KIRR2_MOUSE Kin of IRRE-like protein 2 OS=Mus musculus GN=Kirrel2 PE=1 SV=1	3e-11
KH.S2213.1.v1.A.SL1-1	85	159	167	366	77	303	1.17832	2.84364	2.2809	5.06796	1.06824	5.2132	2.41331	2.22191	4.88017	O86236	sp|O86236|Y132A_HAEIN Uncharacterized transposase-like protein HI_1328.1 OS=Haemophilus influenzae (strain ATCC 51907 / DSM 11121 / KW20 / Rd) GN=HI_1328.1 PE=4 SV=1	0.0002
KH.C6.291.v1.A.SL2-1	92	158	88	177	60	233	1.94732	4.31461	1.83518	3.74225	1.27097	6.12104	2.21566	2.03917	4.81602	A8Z414	sp|A8Z414|EBH_STAAT Extracellular matrix-binding protein ebh OS=Staphylococcus aureus (strain USA300 / TCH1516) GN=ebh PE=1 SV=1	10
KH.C6.26.v3.A.SL1-1	1585	3090	2309	6338	1304	5039	35.5581	89.4338	51.0363	142.027	29.2767	140.305	2.51515	2.78286	4.79237	Q8MIT8	sp|Q8MIT8|CXB2_MACMU Gap junction beta-2 protein OS=Macaca mulatta GN=GJB2 PE=2 SV=1	0.002
KH.C9.412.v1.A.SL2-1	417	845	367	2957	174	664	2.91111	7.6105	2.52426	20.6197	1.21564	5.75319	2.6143	8.1686	4.73263	Q3IF34	sp|Q3IF34|MNMC_PSEHT tRNA 5-methylaminomethyl-2-thiouridine biosynthesis bifunctional protein MnmC OS=Pseudoalteromonas haloplanktis (strain TAC 125) GN=mnmC PE=3 SV=1	2.2
KH.C2.802.v1.A.SL1-1	90	166	103	277	60	228	3.18365	7.57575	3.58977	9.7875	2.12408	10.0101	2.37958	2.7265	4.71267	0	0	0
KH.C11.148.v2.A.nonSL43-1	368	785	65	399	105	396	10.517	28.9432	1.83022	11.39	3.00309	14.0461	2.75205	6.22332	4.67724	Q3ZM03	sp|Q3ZM03|RSSA_XENLA 40S ribosomal protein SA OS=Xenopus laevis GN=rpsa PE=1 SV=1	5e-83
KH.L119.33.v1.A.SL1-1	327	515	297	873	383	1443	3.36677	6.8408	3.01278	8.97818	3.94638	18.4395	2.03186	2.98003	4.67252	Q9W6F8	sp|Q9W6F8|WIF1_XENLA Wnt inhibitory factor 1 OS=Xenopus laevis GN=wif1 PE=2 SV=1	0.0007
KH.L83.7.v1.A.ND1-1	55	129	42	123	36	135	0.82417	2.49389	0.620083	1.84106	0.539873	2.51077	3.02595	2.96906	4.65066	Q7TNC8	sp|Q7TNC8|GLRA2_MOUSE Glycine receptor subunit alpha-2 OS=Mus musculus GN=Glra2 PE=2 SV=1	7e-92
KH.L87.29.v1.A.ND1-1	111	257	58	458	73	271	1.37835	4.11723	0.709598	5.68083	0.907185	4.17663	2.98706	8.00571	4.60394	P13866	sp|P13866|SC5A1_HUMAN Sodium/glucose cotransporter 1 OS=Homo sapiens GN=SLC5A1 PE=1 SV=1	1e-103
KH.L128.2.v1.A.SL1-1	48	227	48	259	121	448	0.560036	3.41692	0.551776	3.01845	1.41285	6.48742	6.10125	5.47042	4.59173	Q5REC2	sp|Q5REC2|NEC2_PONAB Neuroendocrine convertase 2 OS=Pongo abelii GN=PCSK2 PE=2 SV=1	3e-145
KH.C10.551.v2.A.SL2-1	101	247	213	458	124	456	0.842398	2.65783	1.75034	3.81567	1.03503	4.72041	3.15508	2.17996	4.56065	Q5YLG1	sp|Q5YLG1|GUNA_BACPU Endoglucanase A OS=Bacillus pumilus GN=eglA PE=1 SV=1	2e-40
KH.L168.2.v3.A.SL1-1	68	116	35	151	40	146	1.08708	2.39246	0.551273	2.41123	0.639953	2.89684	2.20081	4.37393	4.52664	Q6NS52	sp|Q6NS52|DGKB_MOUSE Diacylglycerol kinase beta OS=Mus musculus GN=Dgkb PE=2 SV=2	3e-78
KH.C12.354.v1.A.ND1-1	81	724	183	576	152	546	0.946126	10.9103	2.10602	6.7204	1.77682	7.91545	11.5316	3.19105	4.45484	O16025	sp|O16025|AOSL_PLEHO Allene oxide synthase-lipoxygenase protein OS=Plexaura homomalla PE=1 SV=1	5e-28
KH.C8.605.v1.A.SL1-1	524	964	901	2515	631	2266	3.72328	8.83703	6.30763	17.8501	4.48704	19.9836	2.37345	2.82993	4.45363	Q9Z139	sp|Q9Z139|ROR1_MOUSE Tyrosine-protein kinase transmembrane receptor ROR1 OS=Mus musculus GN=Ror1 PE=2 SV=2	3e-57
KH.C5.152.v1.A.SL1-1	72	121	142	325	30	107	1.89403	4.10652	3.68035	8.53978	0.789789	3.49347	2.16814	2.32037	4.42329	A6Q421	sp|A6Q421|DNAK_NITSB Chaperone protein DnaK OS=Nitratiruptor sp. (strain SB155-2) GN=dnaK PE=3 SV=1	4.8
KH.L116.28.v3.A.SL3-1	521	987	370	1193	277	969	7.82599	19.1273	5.47583	17.8999	4.16406	18.0653	2.44407	3.2689	4.33838	O35156	sp|O35156|UGPA_CRIGR UTP--glucose-1-phosphate uridylyltransferase OS=Cricetulus griseus GN=UGP2 PE=2 SV=3	4e-127
KH.C9.496.v3.A.SL3-1	56	137	64	326	59	205	1.7021	5.37219	1.91656	9.89744	1.79467	7.73338	3.15622	5.16416	4.30909	P19096	sp|P19096|FAS_MOUSE Fatty acid synthase OS=Mus musculus GN=Fasn PE=1 SV=2	3.9
KH.C3.278.v1.C.ND1-1	158	279	172	476	124	421	3.29276	7.50139	3.53165	9.90876	2.58619	10.8894	2.27815	2.8057	4.2106	Q20176	sp|Q20176|NAS39_CAEEL Zinc metalloproteinase nas-39 OS=Caenorhabditis elegans GN=nas-39 PE=3 SV=3	0.055
KH.C2.1004.v1.A.ND1-1	91	171	79	175	53	175	2.16325	5.24439	1.85028	4.15539	1.26089	5.16323	2.42432	2.24581	4.09492	Q90XD2	sp|Q90XD2|SPEB_CHICK Agmatinase, mitochondrial OS=Gallus gallus GN=AGMAT PE=2 SV=1	3e-92
KH.C14.24.v2.A.ND1-1	209	384	141	330	70	231	2.2502	5.33385	1.49569	3.54893	0.754238	3.08678	2.37039	2.37278	4.09258	Q5ZL91	sp|Q5ZL91|INT7_CHICK Integrator complex subunit 7 OS=Gallus gallus GN=INTS7 PE=2 SV=1	3e-58
KH.C12.93.v1.A.SL1-1	63	150	107	359	70	231	0.595049	1.82784	0.995732	3.387	0.661677	2.70796	3.07174	3.40152	4.09258	Q95LD9	sp|Q95LD9|AHR_DELLE Aryl hydrocarbon receptor OS=Delphinapterus leucas GN=AHR PE=2 SV=1	3e-65
KH.C10.277.v2.A.SL1-2	217	365	343	828	86	282	9.85011	21.3751	15.3399	37.5423	3.90675	15.8873	2.17004	2.44736	4.06662	Q8C9A2	sp|Q8C9A2|ENDOV_MOUSE Endonuclease V OS=Mus musculus GN=Endov PE=1 SV=2	4e-06
KH.C4.105.v2.R.ND1-1	449	733	304	1844	527	1723	4.23833	8.92662	2.82728	17.3867	4.97845	20.1861	2.10616	6.14964	4.05469	Q9UL12	sp|Q9UL12|SARDH_HUMAN Sarcosine dehydrogenase, mitochondrial OS=Homo sapiens GN=SARDH PE=1 SV=1	3e-117
KH.C9.141.v1.C.SL1-1	907	1547	743	1505	236	767	23.1543	50.9506	18.6879	38.3769	6.02937	24.3018	2.20048	2.05357	4.03057	Q7SY07	sp|Q7SY07|EIF1A_DANRE Probable RNA-binding protein EIF1AD OS=Danio rerio GN=eif1ad PE=2 SV=1	3e-23
KH.C8.329.v1.A.SL2-1	399	1066	133	496	116	375	5.07834	17.5041	1.66781	6.30579	1.47755	5.92378	3.44682	3.78088	4.00919	Q8IWA0	sp|Q8IWA0|WDR75_HUMAN WD repeat-containing protein 75 OS=Homo sapiens GN=WDR75 PE=1 SV=1	1e-11
KH.C7.805.v1.A.ND1-1	365	1168	440	1944	808	2612	17.4603	72.0835	20.7376	92.8889	38.6817	155.078	4.12842	4.47926	4.00908	P31434	sp|P31434|XYLS_ECOLI Alpha-xylosidase OS=Escherichia coli (strain K12) GN=yicI PE=1 SV=2	0.49
KH.C3.329.v1.A.nonSL1-1	12362	27099	5886	24661	6510	20179	226.506	640.587	106.257	451.346	119.373	458.89	2.82813	4.24769	3.84416	P27604	sp|P27604|SAHH_CAEEL Adenosylhomocysteinase OS=Caenorhabditis elegans GN=ahcy-1 PE=1 SV=1	1e-148
KH.S406.6.v1.A.nonSL3-1	277	517	143	358	180	556	6.24127	15.0286	3.1745	8.05721	4.05883	15.5484	2.40794	2.5381	3.83077	P0AE24	sp|P0AE24|ARAE_ECOLI Arabinose-proton symporter OS=Escherichia coli (strain K12) GN=araE PE=1 SV=1	0.24
KH.C1.264.v3.A.nonSL14-1	164	366	57	208	44	135	3.10937	8.95249	1.06475	3.93913	0.834865	3.17673	2.8792	3.69957	3.80509	P41824	sp|P41824|YBOXH_APLCA Y-box factor homolog OS=Aplysia californica PE=2 SV=1	7e-31
KH.S2058.1.v1.A.ND1-1	87	140	103	300	65	198	7.729	16.046	9.01546	26.6216	5.779	21.8317	2.07608	2.95288	3.77777	0	0	0
KH.C1.88.v1.A.SL2-1	246	389	177	643	190	578	1.29667	2.64532	0.919207	3.38543	1.00227	3.78129	2.04009	3.68299	3.77275	G5E8K5	sp|G5E8K5|ANK3_MOUSE Ankyrin-3 OS=Mus musculus GN=Ank3 PE=1 SV=1	0
KH.C12.297.v1.B.ND1-1	621	1521	721	3063	500	1510	5.49024	17.3486	6.28031	27.0493	4.4239	16.569	3.15989	4.30699	3.74533	Q80TT2	sp|Q80TT2|BAIP3_MOUSE BAI1-associated protein 3 OS=Mus musculus GN=Baiap3 PE=2 SV=3	2e-09
KH.S404.8.v1.A.nonSL1-1	969	3504	364	4948	2199	6535	34.5525	161.196	12.788	176.236	78.4723	289.214	4.66525	13.7813	3.68556	Q04757	sp|Q04757|HR29_HALRO Body wall muscle protein HR-29 OS=Halocynthia roretzi PE=1 SV=2	0.0009
KH.C14.282.v1.A.SL1-1	945	1754	658	2118	454	1312	9.31332	22.3016	6.38918	20.8501	4.47779	16.0482	2.3946	3.26334	3.58394	Q6PCR6	sp|Q6PCR6|ZFR_DANRE Zinc finger RNA-binding protein OS=Danio rerio GN=zfr PE=2 SV=2	2e-29
KH.C12.441.v1.A.nonSL13-1	182	334	101	299	68	195	3.10595	7.35368	1.69821	5.09687	1.16136	4.13026	2.36761	3.00132	3.55639	O42254	sp|O42254|IF2B1_CHICK Insulin-like growth factor 2 mRNA-binding protein 1 OS=Gallus gallus GN=IGF2BP1 PE=1 SV=1	6e-58
KH.C12.105.v1.A.SL1-2	65	158	81	288	63	179	0.865192	2.71326	1.06226	3.82913	0.839219	2.95713	3.13601	3.60471	3.52367	A6NK53	sp|A6NK53|ZN233_HUMAN Zinc finger protein 233 OS=Homo sapiens GN=ZNF233 PE=2 SV=3	2e-41
KH.C11.558.v1.A.SL1-1	99	324	111	392	128	363	2.40115	10.1383	2.65249	9.49684	3.10692	10.9272	4.22225	3.58035	3.51706	P38571	sp|P38571|LICH_HUMAN Lysosomal acid lipase/cholesteryl ester hydrolase OS=Homo sapiens GN=LIPA PE=1 SV=2	3e-38
KH.C1.429.v1.A.nonSL4-1	78	121	125	251	106	298	0.962042	1.92539	1.51899	3.0923	1.3084	4.56178	2.00136	2.03576	3.48653	P51655	sp|P51655|GPC4_MOUSE Glypican-4 OS=Mus musculus GN=Gpc4 PE=2 SV=2	1e-05
KH.C11.314.v2.A.ND1-1	115	243	91	315	134	376	1.45003	3.95293	1.13049	3.96733	1.69091	5.88418	2.72611	3.50939	3.4799	P79702	sp|P79702|FOS_CYPCA Proto-oncogene c-Fos OS=Cyprinus carpio GN=fos PE=2 SV=1	9e-19
KH.C1.905.v1.A.SL1-1	82	138	115	627	69	193	0.184813	0.401266	0.255366	1.41155	0.155634	0.539877	2.1712	5.52754	3.4689	Q8IVF4	sp|Q8IVF4|DYH10_HUMAN Dynein heavy chain 10, axonemal OS=Homo sapiens GN=DNAH10 PE=1 SV=4	0
KH.C12.67.v1.A.SL1-1	107	177	88	201	95	261	2.27101	4.84666	1.84019	4.26127	2.01787	6.87533	2.13414	2.31567	3.40722	O70433	sp|O70433|FHL2_MOUSE Four and a half LIM domains protein 2 OS=Mus musculus GN=Fhl2 PE=1 SV=1	2e-30
KH.C7.65.v1.C.ND1-1	88	496	111	873	256	702	3.17798	23.1092	3.94947	31.4914	9.25219	31.4648	7.27166	7.97359	3.4008	O70531	sp|O70531|S26A2_RAT Sulfate transporter OS=Rattus norvegicus GN=Slc26a2 PE=2 SV=1	1e-15
KH.C4.269.v1.A.SL2-1	472	746	185	996	303	825	7.65183	15.6026	2.95489	16.1284	4.91588	16.5995	2.03907	5.45821	3.37672	P31695	sp|P31695|NOTC4_MOUSE Neurogenic locus notch homolog protein 4 OS=Mus musculus GN=Notch4 PE=1 SV=2	2e-06
KH.S1442.1.v1.A.SL2-1	661	1226	1183	3454	629	1708	23.2762	55.6976	41.0433	121.491	22.1665	74.648	2.39289	2.96006	3.3676	Q8NKE2	sp|Q8NKE2|AOX_CRYNH Alternative oxidase, mitochondrial OS=Cryptococcus neoformans var. grubii serotype A (strain H99 / ATCC 208821 / CBS 10515 / FGSC 9487) GN=AOX1 PE=3 SV=2	1e-26
KH.C9.123.v1.A.ND1-1	154	377	96	324	180	487	2.6751	8.4488	1.643	5.62177	3.12915	10.4995	3.15831	3.42166	3.35537	Q9HAY6	sp|Q9HAY6|BCDO1_HUMAN Beta,beta-carotene 15,15'-monooxygenase OS=Homo sapiens GN=BCMO1 PE=1 SV=1	4e-36
KH.C4.623.v1.A.SL1-1	5522	9720	3059	10473	1918	5164	53.1248	120.643	28.9952	100.642	18.4665	61.6603	2.27093	3.471	3.33903	Q5R9I6	sp|Q5R9I6|PSMD2_PONAB 26S proteasome non-ATPase regulatory subunit 2 OS=Pongo abelii GN=PSMD2 PE=2 SV=1	8e-145
KH.C11.252.v1.A.SL1-1	897	1417	1033	2859	556	1462	11.5971	23.6353	13.1584	36.9216	7.19395	23.4597	2.03804	2.80593	3.26104	Q641Z6	sp|Q641Z6|EHD1_RAT EH domain-containing protein 1 OS=Rattus norvegicus GN=Ehd1 PE=1 SV=1	2e-133
KH.C9.203.v1.A.SL2-1	1773	3328	1237	4313	1977	5153	36.0792	87.3708	24.8008	87.6672	40.2616	130.145	2.42164	3.53486	3.23249	Q19QT7	sp|Q19QT7|CGL_PIG Cystathionine gamma-lyase OS=Sus scrofa GN=CTH PE=2 SV=1	5e-94
KH.L23.4.v1.A.ND1-1	61	131	60	283	67	174	1.37344	3.80526	1.33099	6.36464	1.50969	4.86235	2.77061	4.78187	3.22076	Q6H2Y3	sp|Q6H2Y3|BRS3_MACMU Bombesin receptor subtype-3 OS=Macaca mulatta GN=BRS3 PE=2 SV=1	1.5
KH.C8.914.v1.A.SL1-1	468	771	376	919	257	663	4.75395	10.1041	3.76308	9.32466	2.61263	8.35875	2.12541	2.47794	3.19936	Q92889	sp|Q92889|XPF_HUMAN DNA repair endonuclease XPF OS=Homo sapiens GN=ERCC4 PE=1 SV=3	9e-51
KH.L36.8.v1.A.SL1-1	111	397	197	1298	369	925	0.599305	2.76535	1.04794	7.00017	1.99382	6.19848	4.61426	6.67991	3.10884	Q96RW7	sp|Q96RW7|HMCN1_HUMAN Hemicentin-1 OS=Homo sapiens GN=HMCN1 PE=1 SV=2	3e-21
KH.S511.3.v1.A.SL1-1	52	263	66	372	186	461	0.922872	6.02182	1.15406	6.59462	3.30359	10.1545	6.52509	5.71428	3.07377	Q04052	sp|Q04052|ARO80_YEAST Transcriptional activator ARO80 OS=Saccharomyces cerevisiae (strain ATCC 204508 / S288c) GN=ARO80 PE=1 SV=1	0.55
KH.L49.1.v1.A.ND1-1	192	329	95	521	51	126	4.45521	9.84912	2.17189	12.0757	1.18433	3.62875	2.2107	5.56002	3.06396	P97479	sp|P97479|MYO7A_MOUSE Unconventional myosin-VIIa OS=Mus musculus GN=Myo7a PE=1 SV=2	4e-05
KH.C14.462.v1.B.ND1-1	459	783	177	538	130	319	3.42994	7.54867	1.30315	4.01574	0.972195	2.95858	2.20081	3.08157	3.0432	P0C6B8	sp|P0C6B8|SVEP1_RAT Sushi, von Willebrand factor type A, EGF and pentraxin domain-containing protein 1 OS=Rattus norvegicus GN=Svep1 PE=1 SV=1	4e-08
KH.L37.20.v1.A.SL2-1	1830	3889	2328	6784	2397	5786	21.3034	58.4078	26.701	78.8847	27.9255	83.5979	2.74171	2.95437	2.9936	D2XV59	sp|D2XV59|GTPB1_RAT GTP-binding protein 1 OS=Rattus norvegicus GN=Gtpbp1 PE=1 SV=1	2e-142
KH.C3.105.v2.R.ND1-1	79	193	37	129	75	181	3.17364	10.0028	1.46447	5.17642	3.01528	9.02461	3.15184	3.53468	2.99296	P54758	sp|P54758|EPHA6_RAT Ephrin type-A receptor 6 OS=Rattus norvegicus GN=Epha6 PE=2 SV=2	7
KH.C6.133.v1.A.ND2-1	570	961	476	1556	549	1317	12.4027	26.9772	10.2045	33.8188	11.9549	35.5668	2.17512	3.3141	2.97507	Q64640	sp|Q64640|ADK_RAT Adenosine kinase OS=Rattus norvegicus GN=Adk PE=1 SV=3	4e-76
KH.C9.58.v2.A.ND1-1	107	203	103	258	59	141	1.81112	4.43296	1.7177	4.36206	0.999425	2.96211	2.44763	2.53948	2.96381	O14258	sp|O14258|ACE2_SCHPO Metallothionein expression activator OS=Schizosaccharomyces pombe (strain 972 / ATCC 24843) GN=ace2 PE=3 SV=1	0.08
KH.C4.744.v2.A.SL1-1	1651	2625	499	1779	412	979	11.8421	24.2911	3.52639	12.7458	2.95744	8.71534	2.05124	3.61441	2.94692	Q6P423	sp|Q6P423|MED23_XENLA Mediator of RNA polymerase II transcription subunit 23 OS=Xenopus laevis GN=med23 PE=2 SV=1	0
KH.C2.913.v2.A.SL2-1	438	734	126	268	107	253	9.36016	20.2367	2.65293	5.72075	2.28838	6.7104	2.162	2.15639	2.93238	Q6P9B9	sp|Q6P9B9|INT5_HUMAN Integrator complex subunit 5 OS=Homo sapiens GN=INTS5 PE=1 SV=1	1e-05
KH.C10.587.v1.A.ND1-1	1981	4010	1410	6545	2637	6234	164.258	428.963	115.188	542.075	218.82	641.544	2.61153	4.70601	2.93184	Q5XH12	sp|Q5XH12|DHX32_XENLA Putative pre-mRNA-splicing factor ATP-dependent RNA helicase DHX32 OS=Xenopus laevis GN=dhx32 PE=2 SV=1	0.44
KH.L170.47.v2.R.ND3-1	974	1531	393	930	386	900	22.9434	46.5273	9.12089	21.8822	9.09957	26.3123	2.02792	2.39912	2.8916	Q5R1X4	sp|Q5R1X4|ALDOC_PANTR Fructose-bisphosphate aldolase C OS=Pan troglodytes GN=ALDOC PE=2 SV=3	1e-104
KH.C1.866.v1.A.ND1-1	229	706	153	1541	586	1364	4.16888	16.5815	2.74424	28.0218	10.6762	30.8189	3.97744	10.2111	2.88669	Q9ERI6	sp|Q9ERI6|RDH14_MOUSE Retinol dehydrogenase 14 OS=Mus musculus GN=Rdh14 PE=2 SV=1	5e-39
KH.C7.230.v1.A.SL3-1	1304	2055	479	1823	775	1784	52.7258	107.199	19.0822	73.6277	31.3605	89.5281	2.03315	3.85846	2.85481	0	0	0
KH.C3.549.v1.A.SL1-1	556	899	337	882	377	855	5.34077	11.141	3.18938	8.46266	3.62415	10.1933	2.08602	2.65339	2.8126	O93510	sp|O93510|GELS_CHICK Gelsolin OS=Gallus gallus GN=GSN PE=2 SV=1	1e-107
KH.C11.49.v3.R.ND1-1	62	131	60	169	62	140	0.560735	1.52852	0.534643	1.52673	0.561169	1.5715	2.72593	2.8556	2.8004	Q80TI1	sp|Q80TI1|PKHH1_MOUSE Pleckstrin homology domain-containing family H member 1 OS=Mus musculus GN=Plekhh1 PE=2 SV=2	7e-55
KH.C6.112.v1.A.SL2-1	859	1341	1233	2542	410	925	9.72668	19.59	13.7556	28.7512	4.64612	12.9997	2.01405	2.09014	2.79796	Q9D4H7	sp|Q9D4H7|LONF3_MOUSE LON peptidase N-terminal domain and RING finger protein 3 OS=Mus musculus GN=Lonrf3 PE=2 SV=1	6e-43
KH.C8.176.v1.A.ND1-1	167	284	127	697	414	922	1.58554	3.47867	1.18798	6.61002	3.93366	10.8645	2.194	5.56406	2.76194	P26225	sp|P26225|GUNB_CELFI Endoglucanase B OS=Cellulomonas fimi GN=cenB PE=3 SV=1	2e-32
KH.S404.12.v1.R.ND1-1	298	1222	116	1609	1030	2292	8.00857	42.3686	3.07145	43.192	27.702	76.4491	5.29041	14.0624	2.75969	Q04757	sp|Q04757|HR29_HALRO Body wall muscle protein HR-29 OS=Halocynthia roretzi PE=1 SV=2	0.007
KH.L102.7.v1.A.ND1-1	419	829	193	549	469	1040	5.76471	14.7147	2.61618	7.54475	6.45761	17.7589	2.55255	2.88388	2.75007	Q63099	sp|Q63099|KCNB2_RAT Potassium voltage-gated channel subfamily B member 2 OS=Rattus norvegicus GN=Kcnb2 PE=2 SV=2	3e-25
KH.C11.302.v2.A.SL4-1	276	449	277	755	126	275	2.46605	5.17575	2.43848	6.73827	1.12668	3.04961	2.0988	2.76331	2.70673	Q86XI2	sp|Q86XI2|CNDG2_HUMAN Condensin-2 complex subunit G2 OS=Homo sapiens GN=NCAPG2 PE=1 SV=1	4e-23
KH.C9.49.v1.A.SL1-1	23	132	34	792	117	255	0.568485	4.2092	0.827974	19.5535	2.89409	7.82259	7.40424	23.6161	2.70295	P49799	sp|P49799|RGS4_RAT Regulator of G-protein signaling 4 OS=Rattus norvegicus GN=Rgs4 PE=1 SV=1	4e-12
KH.C9.131.v1.A.SL1-1	122	202	206	634	114	248	0.635522	1.35755	1.05727	3.2989	0.594307	1.6034	2.13612	3.12021	2.69793	P22105	sp|P22105|TENX_HUMAN Tenascin-X OS=Homo sapiens GN=TNXB PE=1 SV=3	2e-80
KH.C11.108.v1.A.SL1-1	1093	2001	551	1290	367	798	8.52619	20.138	4.2348	10.0516	2.86508	7.72603	2.3619	2.37356	2.69662	A2ABV5	sp|A2ABV5|MED14_MOUSE Mediator of RNA polymerase II transcription subunit 14 OS=Mus musculus GN=Med14 PE=1 SV=1	2e-58
KH.C10.401.v1.A.ND1-1	99	180	92	260	87	189	1.21431	2.8484	1.1118	3.18549	1.06794	2.87723	2.3457	2.86515	2.69418	Q622K8	sp|Q622K8|HUM6_CAEBR Unconventional myosin heavy chain 6 OS=Caenorhabditis briggsae GN=hum-6 PE=3 SV=1	1.5
KH.C1.290.v1.A.ND1-1	7812	12495	7677	23593	10113	21671	43.4377	89.6346	42.0574	131.038	56.2756	149.556	2.06352	3.11569	2.65756	Q864R9	sp|Q864R9|MRP1_MACFA Multidrug resistance-associated protein 1 OS=Macaca fascicularis GN=ABCC1 PE=2 SV=1	8e-124
KH.C9.379.v1.C.SL1-1	79	138	43	655	72	153	1.02435	2.30853	0.549336	8.48346	0.93431	2.46226	2.25365	15.4431	2.63537	O62852	sp|O62852|TRPC5_RABIT Short transient receptor potential channel 5 OS=Oryctolagus cuniculus GN=TRPC5 PE=2 SV=1	2e-08
KH.L38.14.v1.A.ND1-1	163	354	186	429	137	287	3.79646	10.6372	4.26825	9.98061	3.19335	8.29644	2.80188	2.33834	2.59803	Q45Z25	sp|Q45Z25|PA2A6_TROCA Acidic phospholipase A2 6 OS=Tropidechis carinatus PE=2 SV=1	2e-14
KH.C3.731.v1.C.ND1-1	545	1050	618	3155	1199	2486	44.9497	111.726	50.2187	259.92	98.9659	254.478	2.48558	5.17575	2.57137	B2WDP9	sp|B2WDP9|VPS10_PYRTR Vacuolar protein sorting/targeting protein 10 OS=Pyrenophora tritici-repentis (strain Pt-1C-BFP) GN=vps10 PE=3 SV=1	1.8
KH.C13.193.v1.B.SL1-1	273	455	228	607	261	535	4.09088	8.79629	3.36616	9.08556	3.91408	9.95008	2.15022	2.69908	2.54212	0	0	0
KH.C2.759.v1.A.ND1-1	136	307	125	307	113	231	2.03893	5.93794	1.84637	4.59738	1.69542	4.29827	2.91228	2.48995	2.53523	Q7PX35	sp|Q7PX35|NCBP1_ANOGA Nuclear cap-binding protein subunit 1 OS=Anopheles gambiae GN=Cbp80 PE=3 SV=4	8
KH.C9.14.v1.A.ND1-1	313	547	147	355	69	140	8.34676	18.8189	3.86222	9.45607	1.84144	4.63362	2.25464	2.44835	2.5163	Q8TEP8	sp|Q8TEP8|CE192_HUMAN Centrosomal protein of 192 kDa OS=Homo sapiens GN=CEP192 PE=1 SV=2	6e-14
KH.C1.201.v2.A.ND1-1	94	152	39	122	70	142	1.31009	2.73307	0.53553	1.6984	0.976351	2.45629	2.08617	3.17145	2.51579	Q7RTX9	sp|Q7RTX9|MOT14_HUMAN Monocarboxylate transporter 14 OS=Homo sapiens GN=SLC16A14 PE=2 SV=1	5e-07
KH.C9.332.v1.A.SL1-1	83	155	46	230	135	270	2.52275	6.07803	1.37753	6.98286	4.10644	10.1854	2.40928	5.06912	2.48035	Q24814	sp|Q24814|RACA_ENTHI Rho-related protein racA OS=Entamoeba histolytica GN=RACA PE=3 SV=1	7e-46
KH.L131.7.v2.A.nonSL26-1	91	159	24	108	50	100	2.92911	6.60277	0.761119	3.47238	1.61065	3.99497	2.25419	4.56221	2.48035	A1Z623	sp|A1Z623|SEP15_PIG 15 kDa selenoprotein OS=Sus scrofa GN=SEP15 PE=2 SV=2	3e-12
KH.C13.89.v1.A.nonSL9-1	190	340	124	319	155	309	2.9261	6.75537	1.8815	4.90722	2.38893	5.90627	2.30866	2.60814	2.47235	Q10713	sp|Q10713|MPPA_HUMAN Mitochondrial-processing peptidase subunit alpha OS=Homo sapiens GN=PMPCA PE=1 SV=2	3e-90
KH.C11.288.v2.A.SL1-1	19	157	51	145	117	229	0.299129	3.18889	0.791082	2.28025	1.84343	4.47465	10.6606	2.88244	2.42735	Q8WWA0	sp|Q8WWA0|ITLN1_HUMAN Intelectin-1 OS=Homo sapiens GN=ITLN1 PE=1 SV=1	2e-20
KH.C2.313.v1.A.SL1-1	221	424	266	887	354	691	7.60986	18.8358	9.02428	30.5082	12.199	29.5312	2.47519	3.38068	2.4208	Q90326	sp|Q90326|IGF1B_CYPCA Insulin-like growth factor I, juvenile form OS=Cyprinus carpio PE=2 SV=1	0.71
KH.C7.264.v1.A.ND2-1	327	643	111	269	145	281	14.1808	35.9748	4.74266	11.6524	6.29298	15.1244	2.53687	2.45692	2.40338	P84175	sp|P84175|RS12_CHICK 40S ribosomal protein S12 OS=Gallus gallus GN=RPS12 PE=1 SV=2	8e-39
KH.C7.233.v1.C.SL1-1	139	262	199	584	274	525	0.968846	2.356	1.36659	4.06595	1.91129	4.5417	2.43176	2.97524	2.37625	G5E8K5	sp|G5E8K5|ANK3_MOUSE Ankyrin-3 OS=Mus musculus GN=Ank3 PE=1 SV=1	5e-28
KH.C2.922.v1.A.SL1-1	105	184	251	679	298	561	0.945507	2.13761	2.22687	6.10737	2.68551	6.26985	2.2608	2.74258	2.33469	P35448	sp|P35448|TSP1_XENLA Thrombospondin-1 OS=Xenopus laevis GN=thbs1 PE=2 SV=1	1e-05
KH.L75.4.v3.C.nonSL6-2	181	286	89	181	69	129	2.60674	5.31398	1.26286	2.6038	0.994498	2.30583	2.03855	2.06182	2.31859	P07903	sp|P07903|ERCC1_MOUSE DNA excision repair protein ERCC-1 OS=Mus musculus GN=Ercc1 PE=2 SV=2	1e-29
KH.C14.330.v2.A.SL1-1	677	1425	784	2283	1275	2370	5.16068	14.0142	5.88818	17.3833	9.72667	22.4226	2.71557	2.95224	2.30527	B5FM34	sp|B5FM34|SOPA_SALDC E3 ubiquitin-protein ligase SopA OS=Salmonella dublin (strain CT_02021853) GN=sopA PE=3 SV=1	0.003
KH.L20.63.v1.B.ND1-1	2285	3569	1876	6449	3025	5425	315.774	636.313	255.428	890.207	418.36	930.482	2.01509	3.48515	2.22412	O22018	sp|O22018|TRPA_CYAME Tryptophan synthase alpha chain OS=Cyanidioschyzon merolae GN=trpA PE=3 SV=2	0.001
KH.C2.765.v1.A.SL2-1	71	123	87	196	99	174	0.759949	1.6985	0.917469	2.09552	1.06047	2.3115	2.23502	2.28402	2.1797	Q9JIS1	sp|Q9JIS1|RIMS2_RAT Regulating synaptic membrane exocytosis protein 2 OS=Rattus norvegicus GN=Rims2 PE=1 SV=1	7e-43
KH.C12.218.v1.A.SL1-1	99	158	82	311	152	267	1.2869	2.64973	1.0502	4.03813	1.97738	4.30766	2.059	3.84511	2.17847	P21927	sp|P21927|CHLE_RABIT Cholinesterase OS=Oryctolagus cuniculus GN=BCHE PE=2 SV=1	8e-58
KH.L147.31.v1.A.nonSL4-1	1209	1895	326	1116	311	544	11.9606	24.1864	3.17755	11.0281	3.0791	6.67952	2.02217	3.47064	2.16931	P11216	sp|P11216|PYGB_HUMAN Glycogen phosphorylase, brain form OS=Homo sapiens GN=PYGB PE=1 SV=5	0
KH.C2.251.v2.A.SL3-1	86	381	138	282	197	343	1.75809	10.0485	2.77951	5.75839	4.03037	8.70274	5.71559	2.07173	2.15929	Q7X9V2	sp|Q7X9V2|PIE1_ARATH Protein PHOTOPERIOD-INDEPENDENT EARLY FLOWERING 1 OS=Arabidopsis thaliana GN=PIE1 PE=1 SV=1	0.83
KH.C5.651.v1.A.ND1-1	123	282	145	443	184	319	0.69398	2.0527	0.806039	2.49663	1.03895	2.23384	2.95787	3.09741	2.15009	Q61115	sp|Q61115|PTC1_MOUSE Protein patched homolog 1 OS=Mus musculus GN=Ptch1 PE=1 SV=1	9e-65
KH.L170.42.v2.A.ND2-1	98	230	48	401	246	422	5.4028	16.3589	2.60724	22.0824	13.5726	28.8751	3.02786	8.46965	2.12746	Q5R7U4	sp|Q5R7U4|GBG2_PONAB Guanine nucleotide-binding protein G(I)/G(S)/G(O) subunit gamma-2 OS=Pongo abelii GN=GNG2 PE=3 SV=3	3e-05
Downregulated genes in MEK-inhibited follicles	Reads						RPKM						Ratio
Gene ID	Control (C)1	MEK inh. (M)1	C2	M2	C3	M3	C1	M1	C2	M2	C3	M3	M1/C1	M2/C2	M3/C3	UniProt ID	Homologous protein	E-value
KH.C1.660.v2.A.SL2-1	105	24	180	41	233	8	6.1254	1.8063	10.3458	2.38912	13.603	0.579233	0.294887	0.230927	0.0425812	Q6NXD8	sp|Q6NXD8|DEN5B_DANRE DENN domain-containing protein 5B OS=Danio rerio GN=dennd5b PE=2 SV=2	4.8
KH.C3.678.v1.C.SL3-1	702	66	717	83	1254	50	34.2128	4.14982	34.4284	4.04053	61.1624	3.02441	0.121295	0.11736	0.0494488	Q9Y6H3	sp|Q9Y6H3|ATP23_HUMAN Mitochondrial inner membrane protease ATP23 homolog OS=Homo sapiens GN=XRCC6BP1 PE=1 SV=3	5e-20
KH.C10.491.v1.A.ND1-1	309	95	245	28	248	13	11.7027	4.64181	9.142	1.05924	9.39974	0.61107	0.396643	0.115866	0.0650092	Q9H0Y0	sp|Q9H0Y0|ATG10_HUMAN Ubiquitin-like-conjugating enzyme ATG10 OS=Homo sapiens GN=ATG10 PE=1 SV=1	3e-16
KH.L96.11.v1.A.SL1-1	993	169	1577	239	2049	109	9.78948	2.14947	15.3175	2.35352	20.2157	1.33369	0.219569	0.153649	0.0659733	O42478	sp|O42478|TLE4_XENLA Transducin-like enhancer protein 4 OS=Xenopus laevis GN=tle4 PE=1 SV=2	4e-119
KH.C13.114.v1.C.ND1-1	325	23	537	26	685	37	7.45789	0.680918	12.141	0.595957	15.7311	1.05379	0.0913017	0.0490864	0.0669876	P52176	sp|P52176|MMP9_BOVIN Matrix metalloproteinase-9 OS=Bos taurus GN=MMP9 PE=2 SV=1	1.9
KH.L20.1.v1.A.SL2-1	408	37	613	34	616	34	4.64017	0.542887	6.86879	0.386244	7.01116	0.479923	0.116997	0.0562317	0.0684513	P43695	sp|P43695|GAT5A_XENLA GATA-binding factor 5-A OS=Xenopus laevis GN=gata5-a PE=2 SV=1	4e-21
KH.L71.16.v1.A.nonSL2-1	785	125	922	87	1535	87	29.9859	6.16016	34.6996	3.31952	58.6802	4.12464	0.205435	0.0956645	0.0702901	B0BRH9	sp|B0BRH9|DDL_ACTPJ D-alanine--D-alanine ligase OS=Actinobacillus pleuropneumoniae serotype 3 (strain JL03) GN=ddl PE=3 SV=1	2.2
KH.C2.479.v1.A.nonSL2-1	189	50	230	46	445	26	9.76197	3.33181	11.7044	2.37324	23.0023	1.66674	0.341305	0.202765	0.0724597	Q9D0B5	sp|Q9D0B5|TSTD3_MOUSE Thiosulfate sulfurtransferase/rhodanese-like domain-containing protein 3 OS=Mus musculus GN=Tstd3 PE=2 SV=1	0.0001
KH.S811.1.v1.A.nonSL5-1	397	92	510	105	794	47	12.114	3.62176	15.3326	3.20034	24.2468	1.77998	0.298973	0.208728	0.0734109	Q9D404	sp|Q9D404|OXSM_MOUSE 3-oxoacyl-[acyl-carrier-protein] synthase, mitochondrial OS=Mus musculus GN=Oxsm PE=1 SV=1	7e-81
KH.C3.596.v1.A.SL3-1	446	75	668	54	1089	69	6.26085	1.35829	9.23892	0.757183	15.299	1.20217	0.216951	0.0819558	0.0785786	A4ZNR4	sp|A4ZNR4|NKD2_DANRE Protein naked cuticle homolog 2 OS=Danio rerio GN=nkd2 PE=2 SV=1	5.9
KH.L172.33.v1.A.nonSL3-1	733	241	643	95	938	60	25.3241	10.7419	21.887	3.2784	32.4316	2.57276	0.424177	0.149787	0.079329	O35118	sp|O35118|GFRA3_MOUSE GDNF family receptor alpha-3 OS=Mus musculus GN=Gfra3 PE=2 SV=1	1.6
KH.C11.735.v1.A.SL3-1	190	13	247	31	121	8	4.07154	0.359404	5.21492	0.663552	2.59493	0.212772	0.0882722	0.127241	0.0819951	Q3V080	sp|Q3V080|ZN583_MOUSE Zinc finger protein 583 OS=Mus musculus GN=Znf583 PE=2 SV=1	3e-50
KH.C6.217.v1.A.ND1-1	914	130	1498	77	1088	72	16.688	3.06221	26.9473	1.40429	19.8802	1.63158	0.183498	0.0521124	0.0820705	Q5RBZ6	sp|Q5RBZ6|CHSTA_PONAB Carbohydrate sulfotransferase 10 OS=Pongo abelii GN=CHST10 PE=2 SV=1	0.005
KH.L37.79.v2.A.SL3-1	812	99	869	123	1339	91	20.07	3.1569	21.162	3.03672	33.1213	2.79159	0.157295	0.143499	0.0842838	P12255	sp|P12255|FHAB_BORPE Filamentous hemagglutinin OS=Bordetella pertussis (strain Tohama I / ATCC BAA-589 / NCTC 13251) GN=fhaB PE=1 SV=4	0.32
KH.C11.419.v3.A.nonSL5-1	169	64	172	26	263	18	3.55056	1.7347	3.56029	0.545623	5.5297	0.469355	0.488571	0.153252	0.084879	Q6NZH5	sp|Q6NZH5|CXG1_XENTR Gap junction gamma-1 protein OS=Xenopus tropicalis GN=gjc1 PE=2 SV=1	1e-21
KH.C2.389.v1.A.ND1-1	594	100	719	70	1148	80	19.796	4.29957	23.6084	2.33022	38.2885	3.30902	0.217194	0.0987033	0.0864234	Q80XJ3	sp|Q80XJ3|TTC28_MOUSE Tetratricopeptide repeat protein 28 OS=Mus musculus GN=Ttc28 PE=2 SV=3	1e-05
KH.C1.261.v1.A.ND1-1	1544	133	1454	137	2109	149	44.3703	4.93095	41.1676	3.93255	60.6536	5.31435	0.111132	0.0955253	0.0876179	Q97B58	sp|Q97B58|UPPS_THEVO Tritrans,polycis-undecaprenyl-diphosphate synthase (geranylgeranyl-diphosphate specific) OS=Thermoplasma volcanium (strain ATCC 51530 / DSM 4299 / JCM 9571 / NBRC 15438 / GSS1) GN=uppS PE=3 SV=1	1.7
KH.C3.24.v1.C.ND1-1	961	87	1024	82	1143	83	14.3383	1.67467	15.0529	1.22207	17.067	1.53699	0.116797	0.0811851	0.0900565	Q9D379	sp|Q9D379|HYEP_MOUSE Epoxide hydrolase 1 OS=Mus musculus GN=Ephx1 PE=1 SV=2	5e-53
KH.C8.311.v1.A.SL2-1	214	9	361	22	179	13	4.15359	0.225365	6.9034	0.426522	3.47695	0.313164	0.0542579	0.0617843	0.0900687	Q9FR82	sp|Q9FR82|SLD1_BOROF Delta(8)-fatty-acid desaturase OS=Borago officinalis GN=sld1 PE=1 SV=1	2e-09
KH.C4.494.v1.A.nonSL2-1	4998	1668	5853	566	7308	544	52.4844	22.5977	60.5562	5.93689	76.8011	7.09008	0.43056	0.0980393	0.0923174	Q91044	sp|Q91044|NTRK3_CHICK NT-3 growth factor receptor OS=Gallus gallus GN=NTRK3 PE=2 SV=2	0.021
KH.L170.89.v1.A.SL1-1	271	20	601	50	377	29	4.27302	0.406846	9.33654	0.787488	5.94897	0.567521	0.0952127	0.0843447	0.0953982	F6PTN1	sp|F6PTN1|TIKI1_XENTR Metalloprotease TIKI1 OS=Xenopus tropicalis GN=trabd2a PE=2 SV=2	7e-56
KH.C10.495.v1.A.SL5-1	544	125	515	77	684	53	20.4041	6.0487	19.0314	2.88481	25.6749	2.46724	0.296446	0.151581	0.0960955	P26187	sp|P26187|MGMT_MOUSE Methylated-DNA--protein-cysteine methyltransferase OS=Mus musculus GN=Mgmt PE=1 SV=3	7e-16
KH.C4.370.v2.A.nonSL2-1	170	43	295	59	420	33	1.75147	0.571552	2.99448	0.607175	4.3305	0.421974	0.326328	0.202765	0.0974424	O95428	sp|O95428|PPN_HUMAN Papilin OS=Homo sapiens GN=PAPLN PE=2 SV=4	7e-19
KH.L71.7.v3.R.ND3-2	453	45	655	71	737	58	4.80568	0.61589	6.84611	0.752356	7.82455	0.763665	0.128159	0.109895	0.0975987	Q5S2C4	sp|Q5S2C4|NCKP1_ARATH Protein NAP1 OS=Arabidopsis thaliana GN=NAP1 PE=1 SV=2	9.2
KH.C6.71.v2.A.nonSL1-1	298	52	475	76	482	38	3.57343	0.804465	5.6119	0.910316	5.78432	0.565551	0.225124	0.162212	0.0977732	P91943	sp|P91943|PANG1_DROME Protein pangolin, isoforms A/H/I/S OS=Drosophila melanogaster GN=pan PE=1 SV=1	2e-35
KH.C11.285.v2.B.ND1-1	113	14	158	16	162	13	4.21293	0.673393	5.80376	0.595847	6.04445	0.601545	0.159839	0.102666	0.0995203	A5N4T0	sp|A5N4T0|TRUA_CLOK5 tRNA pseudouridine synthase A OS=Clostridium kluyveri (strain ATCC 8527 / DSM 555 / NCIMB 10680) GN=truA PE=3 SV=1	0.097
KH.C9.548.v1.A.SL1-1	478	77	495	78	580	48	16.3327	3.39434	16.6641	2.66216	19.8333	2.03559	0.207825	0.159754	0.102635	Q5REG4	sp|Q5REG4|DTX3_PONAB Probable E3 ubiquitin-protein ligase DTX3 OS=Pongo abelii GN=DTX3 PE=2 SV=1	7e-30
KH.C3.431.v1.A.SL2-1	824	113	997	158	1139	96	39.2963	6.95244	46.8453	7.52645	54.3605	5.68217	0.176924	0.160666	0.104528	Q1QL03	sp|Q1QL03|EFP_NITHX Elongation factor P OS=Nitrobacter hamburgensis (strain X14 / DSM 10229) GN=efp PE=3 SV=1	1.7
KH.C1.1144.v1.A.nonSL5-1	336	32	363	64	305	26	7.75035	0.952284	8.24964	1.47459	7.04073	0.744345	0.12287	0.178746	0.10572	Q1T765	sp|Q1T765|CENPN_CHICK Centromere protein N OS=Gallus gallus GN=CENPN PE=2 SV=1	0.23
KH.L141.27.v2.A.SL2-1	187	51	151	26	196	17	5.16846	1.81855	4.1119	0.717797	5.4214	0.583159	0.351854	0.174566	0.107566	A2APC3	sp|A2APC3|TTLL9_MOUSE Probable tubulin polyglutamylase TTLL9 OS=Mus musculus GN=Ttll9 PE=2 SV=2	1.1
KH.C4.712.v1.A.SL1-1	2776	325	2909	462	4925	434	132.999	20.0884	137.315	22.1095	236.14	25.8069	0.151042	0.161013	0.109287	Q4V7R8	sp|Q4V7R8|FOPNL_XENLA LisH domain-containing protein FOPNL OS=Xenopus laevis GN=Fopnl PE=2 SV=1	2e-20
KH.L57.13.v1.A.SL1-1	981	93	1238	203	916	81	14.4632	1.76894	17.983	2.98951	13.5153	1.48217	0.122306	0.166241	0.109666	Q7SXZ1	sp|Q7SXZ1|PIGB_DANRE GPI mannosyltransferase 3 OS=Danio rerio GN=pigb PE=2 SV=1	4e-21
KH.C5.297.v2.A.nonSL4-2	104	10	147	15	180	16	4.34059	0.538456	6.04477	0.62534	7.51837	0.828809	0.124051	0.103451	0.110238	Q5ZLN1	sp|Q5ZLN1|PGAM1_CHICK Phosphoglycerate mutase 1 OS=Gallus gallus GN=PGAM1 PE=1 SV=3	2e-42
KH.L108.14.v1.A.SL1-1	623	55	551	127	496	45	20.0948	2.28872	17.5103	4.09174	16.0108	1.80147	0.113896	0.233676	0.112516	Q9D110	sp|Q9D110|MTHFS_MOUSE 5-formyltetrahydrofolate cyclo-ligase OS=Mus musculus GN=Mthfs PE=2 SV=2	8e-24
KH.L108.42.v1.R.SL1-1	973	204	1230	241	1525	139	29.2028	7.89909	36.3717	7.22501	45.8055	5.17781	0.27049	0.198644	0.113039	O70351	sp|O70351|HCD2_RAT 3-hydroxyacyl-CoA dehydrogenase type-2 OS=Rattus norvegicus GN=Hsd17b10 PE=1 SV=3	4e-32
KH.C5.505.v1.A.SL2-1	249	65	346	114	412	38	3.14473	1.05909	4.30533	1.43813	5.20735	0.595644	0.336782	0.334034	0.114385	Q8X947	sp|Q8X947|CUEO_ECO57 Blue copper oxidase CueO OS=Escherichia coli O157:H7 GN=cueO PE=3 SV=1	0.1
KH.S489.2.v1.A.SL1-1	329	47	376	30	303	29	8.71365	1.60597	9.81156	0.793659	8.03123	0.953281	0.184305	0.0808902	0.118697	A6NN14	sp|A6NN14|ZN729_HUMAN Zinc finger protein 729 OS=Homo sapiens GN=ZNF729 PE=2 SV=3	3e-125
KH.C5.143.v1.A.nonSL3-1	914	239	1364	158	1598	153	14.6871	4.95477	21.5949	2.53605	25.6982	3.05142	0.337354	0.117437	0.11874	Q16828	sp|Q16828|DUS6_HUMAN Dual specificity protein phosphatase 6 OS=Homo sapiens GN=DUSP6 PE=1 SV=2	4e-48
KH.C7.92.v1.A.SL1-1	1295	368	1423	545	5784	562	62.7201	22.9943	67.9029	26.3659	280.35	33.7825	0.366617	0.388288	0.120501	Q54FC5	sp|Q54FC5|Y0965_DICDI TNF receptor-associated factor family protein DDB_G0290965 OS=Dictyostelium discoideum GN=DDB_G0290965 PE=3 SV=1	0.4
KH.C14.576.v1.A.SL2-1	547	77	565	148	276	27	8.16918	1.4836	8.31354	2.20781	4.12511	0.500465	0.181609	0.265568	0.121322	E6ZIJ1	sp|E6ZIJ1|HOIL1_DICLA RanBP-type and C3HC4-type zinc finger-containing protein 1 OS=Dicentrarchus labrax GN=rbck1 PE=3 SV=1	3e-49
KH.S1021.2.v1.A.SL3-1	885	183	903	178	1429	142	21.6676	5.78035	21.7822	4.35309	35.0135	4.31495	0.266773	0.199846	0.123237	Q6DLV9	sp|Q6DLV9|PCGF1_RAT Polycomb group RING finger protein 1 (Fragment) OS=Rattus norvegicus GN=Pcgf1 PE=2 SV=1	3e-28
KH.C3.862.v1.C.SL1-1	840	295	705	135	784	78	37.7984	17.1258	31.2557	6.06788	35.3058	4.3562	0.453082	0.194136	0.123385	O54992	sp|O54992|MAPK5_MOUSE MAP kinase-activated protein kinase 5 OS=Mus musculus GN=Mapkapk5 PE=1 SV=1	5e-50
KH.S1402.1.v1.A.SL2-2	814	173	909	133	1475	147	32.5325	8.92017	35.7934	5.30949	58.9956	7.2917	0.274193	0.148337	0.123597	Q71N41	sp|Q71N41|GAMT_DANRE Guanidinoacetate N-methyltransferase OS=Danio rerio GN=gamt PE=2 SV=2	2e-66
KH.C10.162.v1.R.ND1-1	1135	98	1216	119	781	78	24.7311	2.75492	26.1053	2.59003	17.0308	2.10941	0.111395	0.0992147	0.123859	Q96L50	sp|Q96L50|LLR1_HUMAN Leucine-rich repeat protein 1 OS=Homo sapiens GN=LRR1 PE=1 SV=2	1e-21
KH.C5.605.v1.A.SL1-1	1144	240	1371	154	1360	136	14.1492	3.82959	16.7067	1.90255	16.8338	2.08768	0.270657	0.11388	0.124018	Q8N441	sp|Q8N441|FGRL1_HUMAN Fibroblast growth factor receptor-like 1 OS=Homo sapiens GN=FGFRL1 PE=1 SV=1	4e-30
KH.C14.298.v1.C.nonSL18-1	180	31	208	31	110	11	6.38183	1.41797	7.26578	1.09785	3.90302	0.484043	0.22219	0.151099	0.124018	Q32L19	sp|Q32L19|MND1_BOVIN Meiotic nuclear division protein 1 homolog OS=Bos taurus GN=MND1 PE=2 SV=1	6e-34
KH.L116.33.v1.A.SL2-1	126	48	255	19	169	17	2.75514	1.35409	5.49363	0.414987	3.69824	0.46136	0.491479	0.0755398	0.124751	0	0	0
KH.C10.318.v1.A.SL1-1	105	22	144	36	248	25	4.6574	1.25896	6.29308	1.59502	11.0088	1.3763	0.270314	0.253456	0.125018	Q9CXS4	sp|Q9CXS4|CENPV_MOUSE Centromere protein V OS=Mus musculus GN=Cenpv PE=2 SV=2	2e-33
KH.S432.4.v2.B.ND1-1	482	117	459	99	445	46	16.029	5.01973	15.039	3.28855	14.81	1.89862	0.313165	0.218668	0.128198	Q54C64	sp|Q54C64|PIGL_DICDI Probable N-acetylglucosaminyl-phosphatidylinositol de-N-acetylase OS=Dictyostelium discoideum GN=pigl PE=3 SV=1	3e-17
KH.C3.687.v1.C.SL1-1	1193	269	1945	311	3961	410	88.7434	25.8156	142.548	23.1081	294.874	37.8528	0.290902	0.162108	0.12837	Q5R9W6	sp|Q5R9W6|TAF13_PONAB Transcription initiation factor TFIID subunit 13 OS=Pongo abelii GN=TAF13 PE=2 SV=1	6e-25
KH.C1.156.v1.A.nonSL3-1	195	33	212	46	240	25	3.36474	0.734625	3.60412	0.792837	4.14442	0.535397	0.21833	0.219981	0.129185	Q8D2M5	sp|Q8D2M5|MURA_WIGBR UDP-N-acetylglucosamine 1-carboxyvinyltransferase OS=Wigglesworthia glossinidia brevipalpis GN=murA PE=3 SV=1	0.39
KH.L18.60.v2.A.SL2-1	621	157	1086	78	977	102	9.19922	3.0005	15.8502	1.15415	14.484	1.87533	0.326169	0.0728161	0.129476	P35555	sp|P35555|FBN1_HUMAN Fibrillin-1 OS=Homo sapiens GN=FBN1 PE=1 SV=3	1e-16
KH.S821.1.v1.A.SL1-1	3083	444	4223	534	4284	451	53.1385	9.87309	71.7139	9.1936	73.8959	9.64786	0.185799	0.128198	0.13056	Q6IRP4	sp|Q6IRP4|ABHDD_XENLA Alpha/beta hydrolase domain-containing protein 13 OS=Xenopus laevis GN=abhd13 PE=2 SV=1	1e-30
KH.C3.928.v1.A.SL1-1	875	143	935	236	1126	119	33.5061	7.06458	35.2756	9.02687	43.1509	5.65564	0.210845	0.255896	0.131067	Q32L85	sp|Q32L85|SMDC1_BOVIN SAYSvFN domain-containing protein 1 OS=Bos taurus GN=SAYSD1 PE=2 SV=1	0.004
KH.C5.479.v1.A.nonSL2-1	1557	486	1999	317	2715	287	41.4849	16.706	52.476	8.43664	72.3947	9.49078	0.4027	0.160771	0.131098	Q6P5M2	sp|Q6P5M2|WDR61_DANRE WD repeat-containing protein 61 OS=Danio rerio GN=wdr61 PE=2 SV=1	1e-84
KH.C8.132.v1.B.ND1-1	443	43	593	129	520	55	16.5162	2.06828	21.7825	4.80402	19.4019	2.545	0.125227	0.220545	0.131172	Q8LDI5	sp|Q8LDI5|CXXS1_ARATH Thioredoxin-like protein CXXS1 OS=Arabidopsis thaliana GN=CXXS1 PE=2 SV=2	6.3
KH.C1.700.v1.A.SL2-1	857	117	837	177	982	104	26.0992	4.59692	25.1141	5.38429	29.9291	3.93096	0.176132	0.214393	0.131342	Q3ZBL5	sp|Q3ZBL5|PTH2_BOVIN Peptidyl-tRNA hydrolase 2, mitochondrial OS=Bos taurus GN=PTRH2 PE=2 SV=1	2e-18
KH.C1.43.v1.A.ND2-1	644	159	723	84	557	59	16.3065	5.19404	18.0368	2.12453	14.1145	1.85415	0.318527	0.117789	0.131365	Q9QVP9	sp|Q9QVP9|FAK2_MOUSE Protein-tyrosine kinase 2-beta OS=Mus musculus GN=Ptk2b PE=1 SV=2	0.77
KH.C14.395.v2.A.SL2-1	1457	53	1641	62	479	51	15.9801	0.749945	17.7327	0.679234	5.25763	0.694237	0.04693	0.0383041	0.132044	Q61805	sp|Q61805|LBP_MOUSE Lipopolysaccharide-binding protein OS=Mus musculus GN=Lbp PE=2 SV=2	0.005
KH.C7.584.v1.B.ND1-1	214	7	205	24	103	11	5.93052	0.250272	5.59731	0.664354	2.85662	0.378347	0.0422006	0.118692	0.132446	P70389	sp|P70389|ALS_MOUSE Insulin-like growth factor-binding protein complex acid labile subunit OS=Mus musculus GN=Igfals PE=2 SV=1	5e-20
KH.C2.962.v1.A.ND1-1	502	92	686	296	622	67	4.59494	1.08642	6.18653	2.70631	5.69774	0.76115	0.236439	0.437452	0.133588	Q03364	sp|Q03364|FGFR2_XENLA Fibroblast growth factor receptor 2 OS=Xenopus laevis GN=fgfr2 PE=2 SV=1	8e-25
KH.C3.552.v1.C.SL1-1	442	34	626	68	655	71	18.0123	1.78756	25.1344	2.768	26.7131	3.59108	0.099241	0.110128	0.134431	0	0	0
KH.C8.858.v1.A.SL1-1	2520	463	2787	431	4762	518	80.4477	19.069	87.659	13.7436	152.138	20.524	0.237036	0.156784	0.134904	Q6GN70	sp|Q6GN70|B9D2_XENLA B9 domain-containing protein 2 OS=Xenopus laevis GN=b9d2 PE=2 SV=1	2e-52
KH.C1.573.v1.R.ND3-2	156	38	212	39	248	27	2.01437	0.633044	2.69711	0.503024	3.20481	0.432711	0.314263	0.186505	0.135019	Q9JJP2	sp|Q9JJP2|P73_MOUSE Tumor protein p73 OS=Mus musculus GN=Tp73 PE=1 SV=1	2e-33
KH.C3.11.v1.C.ND1-1	213	46	366	134	402	44	3.73545	1.04077	6.32399	2.34735	7.05545	0.957712	0.27862	0.371181	0.135741	P05164	sp|P05164|PERM_HUMAN Myeloperoxidase OS=Homo sapiens GN=MPO PE=1 SV=1	3e-18
KH.S115.12.v1.A.SL1-1	375	15	627	43	891	99	4.04866	0.208932	6.6695	0.463721	9.62704	1.32658	0.0516053	0.0695286	0.137797	Q7XN12	sp|Q7XN12|GATP2_ORYSJ Probable gamma-aminobutyrate transaminase 2, mitochondrial OS=Oryza sativa subsp. japonica GN=Os04g0614500 PE=2 SV=2	2.2
KH.L70.2.v1.A.SL3-1	646	134	779	255	1102	123	14.9899	4.0115	17.8095	5.91039	25.5908	3.54235	0.267613	0.331868	0.138423	Q3MHY8	sp|Q3MHY8|RBM7_BOVIN RNA-binding protein 7 OS=Bos taurus GN=RBM7 PE=2 SV=1	8e-13
KH.C9.748.v1.A.ND1-1	202	66	250	48	507	57	6.3252	2.66625	7.71275	1.50132	15.8879	2.21522	0.421529	0.194654	0.139428	Q8EB13	sp|Q8EB13|CYSC_SHEON Adenylyl-sulfate kinase OS=Shewanella oneidensis (strain MR-1) GN=cysC PE=3 SV=1	1.6
KH.C7.775.v1.R.ND1-1	504	66	789	81	916	103	8.27414	1.39788	12.7619	1.32827	15.0495	2.09869	0.168946	0.104081	0.139452	Q5RCV1	sp|Q5RCV1|TM104_PONAB Transmembrane protein 104 OS=Pongo abelii GN=TMEM104 PE=2 SV=1	3e-67
KH.L55.6.v1.B.SL2-1	729	266	715	183	1372	155	34.9804	16.4669	33.8026	8.77116	65.885	9.23098	0.470748	0.259482	0.140107	Q14DQ1	sp|Q14DQ1|F219B_MOUSE Protein FAM219B OS=Mus musculus GN=Fam219b PE=2 SV=1	2e-05
KH.C4.435.v3.A.SL12-1	1061	226	1511	225	1443	165	10.4698	2.87718	14.6904	2.21776	14.2503	2.02081	0.274807	0.150966	0.141808	Q7TNR9	sp|Q7TNR9|ARHG4_MOUSE Rho guanine nucleotide exchange factor 4 OS=Mus musculus GN=Arhgef4 PE=2 SV=2	7e-61
KH.S1136.3.v1.A.ND1-1	535	71	786	157	915	105	11.8315	2.02572	17.126	3.46813	20.2509	2.88201	0.171214	0.202507	0.142315	Q8VCF1	sp|Q8VCF1|CANT1_MOUSE Soluble calcium-activated nucleotidase 1 OS=Mus musculus GN=Cant1 PE=2 SV=1	3e-41
KH.C2.315.v1.A.SL1-1	410	50	415	75	380	44	6.32989	0.995903	6.31258	1.1566	5.87126	0.84311	0.157333	0.183221	0.143599	Q8BZT9	sp|Q8BZT9|LACC1_MOUSE Laccase domain-containing protein 1 OS=Mus musculus GN=Lacc1 PE=2 SV=1	9e-06
KH.C4.9.v2.A.nonSL3-1	129	46	144	30	138	16	3.85681	1.77432	4.24178	0.895919	4.12908	0.593714	0.460047	0.211213	0.143789	Q9D0U9	sp|Q9D0U9|ARV1_MOUSE Protein ARV1 OS=Mus musculus GN=Arv1 PE=2 SV=1	4e-05
KH.S115.16.v1.A.nonSL10-1	261	91	369	96	431	50	5.43567	2.44505	7.57155	1.99707	8.98307	1.29241	0.449816	0.263759	0.143872	Q5U2R1	sp|Q5U2R1|DLP1_RAT Decaprenyl-diphosphate synthase subunit 2 OS=Rattus norvegicus GN=Pdss2 PE=2 SV=1	4e-29
KH.L112.12.v1.A.SL2-1	528	201	816	110	947	110	10.8941	5.35044	16.5881	2.26705	19.5544	2.81689	0.49113	0.136667	0.144054	Q5DTK1	sp|Q5DTK1|CHSS3_MOUSE Chondroitin sulfate synthase 3 OS=Mus musculus GN=Chsy3 PE=2 SV=3	5e-16
KH.C1.727.v1.A.SL1-1	635	79	599	97	637	74	9.46978	1.51994	8.80115	1.44493	9.50694	1.36967	0.160505	0.164175	0.144071	Q9YIB7	sp|Q9YIB7|ZIC2B_XENLA Zinc finger protein ZIC 2-B OS=Xenopus laevis GN=zic2-b PE=2 SV=1	2e-52
KH.C11.707.v1.A.SL1-1	2269	348	2812	597	2574	300	32.8758	6.50513	40.1425	8.64024	37.3238	5.39489	0.19787	0.215239	0.144543	Q3SWX0	sp|Q3SWX0|NIPA2_BOVIN Magnesium transporter NIPA2 OS=Bos taurus GN=NIPA2 PE=2 SV=1	1e-33
KH.C7.276.v1.A.SL1-1	2011	252	2908	320	3049	357	36.6526	5.92554	52.2196	5.82575	55.6142	8.0757	0.161668	0.111562	0.145209	Q6PDJ6	sp|Q6PDJ6|FBX42_MOUSE F-box only protein 42 OS=Mus musculus GN=Fbxo42 PE=2 SV=1	4e-12
KH.S999.4.v1.A.SL1-1	1194	95	1108	82	1162	137	44.7839	4.59701	40.9453	3.07214	43.6173	6.37759	0.102649	0.0750303	0.146217	Q5U220	sp|Q5U220|TM254_RAT Transmembrane protein 254 OS=Rattus norvegicus GN=Tmem254 PE=2 SV=1	0.002
KH.C4.608.v1.A.ND1-1	446	38	580	64	161	19	5.67654	0.623974	7.27316	0.81365	2.05074	0.300138	0.109922	0.11187	0.146356	Q4V8D1	sp|Q4V8D1|CP2U1_RAT Cytochrome P450 2U1 OS=Rattus norvegicus GN=Cyp2u1 PE=1 SV=1	4e-20
KH.C7.339.v1.A.ND1-1	569	67	703	74	725	86	5.943	0.902823	7.23427	0.772029	7.57821	1.11483	0.151914	0.106718	0.147111	Q8VEE4	sp|Q8VEE4|RFA1_MOUSE Replication protein A 70 kDa DNA-binding subunit OS=Mus musculus GN=Rpa1 PE=2 SV=1	4
KH.C12.43.v1.A.SL1-1	2037	406	2791	348	3571	424	26.1402	6.7217	35.2878	4.46074	45.861	6.7531	0.25714	0.12641	0.147251	Q62674	sp|Q62674|S28A1_RAT Sodium/nucleoside cotransporter 1 OS=Rattus norvegicus GN=Slc28a1 PE=1 SV=1	2e-82
KH.C1.927.v3.A.ND2-2	111	22	122	36	143	17	2.1872	0.559271	2.36849	0.70856	2.81992	0.415751	0.255702	0.299161	0.147434	Q8BFQ6	sp|Q8BFQ6|DIRC2_MOUSE Disrupted in renal carcinoma protein 2 homolog OS=Mus musculus GN=Dirc2 PE=2 SV=1	2e-08
KH.C2.193.v1.A.ND2-2	334	82	485	68	563	67	5.64725	1.7887	8.07939	1.14844	9.52652	1.406	0.316739	0.142144	0.147588	Q5QP82	sp|Q5QP82|DCA10_HUMAN DDB1- and CUL4-associated factor 10 OS=Homo sapiens GN=DCAF10 PE=1 SV=1	6e-17
KH.C11.85.v1.R.ND2-1	573	84	760	143	973	116	11.1077	2.10078	14.5154	2.76893	18.8763	2.7909	0.189129	0.190759	0.147852	P80193	sp|P80193|BODG_PSESK Gamma-butyrobetaine dioxygenase OS=Pseudomonas sp. (strain AK-1) PE=1 SV=1	0.0004
KH.C5.274.v1.R.ND1-1	199	53	217	46	275	33	3.94368	1.35506	4.23697	0.910575	5.45403	0.811674	0.343603	0.214912	0.148821	P08760	sp|P08760|KAD3_BOVIN GTP:AMP phosphotransferase AK3, mitochondrial OS=Bos taurus GN=AK3 PE=1 SV=3	2e-37
KH.C3.707.v1.A.ND1-1	1756	280	1922	335	2090	252	49.057	10.0918	52.9026	9.34826	58.4331	8.73768	0.205716	0.176707	0.149533	O75521	sp|O75521|ECI2_HUMAN Enoyl-CoA delta isomerase 2, mitochondrial OS=Homo sapiens GN=ECI2 PE=1 SV=4	2e-22
KH.C1.1062.v1.A.ND2-1	1873	451	2037	493	3373	407	38.5685	11.9814	41.3269	10.1403	69.5099	10.4018	0.310651	0.245368	0.149645	Q27955	sp|Q27955|KCAB2_BOVIN Voltage-gated potassium channel subunit beta-2 OS=Bos taurus GN=KCNAB2 PE=1 SV=1	3e-96
KH.C1.1005.v1.A.SL1-1	1062	117	1814	393	1804	219	6.02142	0.855845	10.1335	2.22575	10.2364	1.54112	0.142133	0.219643	0.150554	A2AP18	sp|A2AP18|PLCH2_MOUSE 1-phosphatidylinositol 4,5-bisphosphate phosphodiesterase eta-2 OS=Mus musculus GN=Plch2 PE=1 SV=2	6e-50
KH.C7.433.v1.A.nonSL2-1	134	28	190	22	221	27	10.7942	2.90989	15.0794	1.77018	17.8161	2.6994	0.26958	0.11739	0.151515	Q8BHE1	sp|Q8BHE1|GEMI8_MOUSE Gem-associated protein 8 OS=Mus musculus GN=Gemin8 PE=1 SV=1	0.002
KH.C11.68.v1.A.nonSL4-1	560	192	682	163	736	91	14.0536	6.21636	16.8629	4.08599	18.4848	2.8344	0.442331	0.242307	0.153337	Q4R2Y2	sp|Q4R2Y2|HYLS1_MACFA Hydrolethalus syndrome protein 1 homolog OS=Macaca fascicularis GN=HYLS1 PE=2 SV=1	2e-12
KH.C2.817.v1.A.ND1-1	2213	280	2489	282	1758	218	35.1432	5.73656	38.9431	4.47319	27.9392	4.2967	0.163234	0.114865	0.153787	P51688	sp|P51688|SPHM_HUMAN N-sulphoglucosamine sulphohydrolase OS=Homo sapiens GN=SGSH PE=1 SV=1	7e-101
KH.C1.988.v3.A.SL4-1	857	234	620	89	765	95	11.3248	3.98933	8.07213	1.17476	10.1169	1.55809	0.352265	0.145533	0.154009	P07861	sp|P07861|NEP_RAT Neprilysin OS=Rattus norvegicus GN=Mme PE=1 SV=2	8e-80
KH.C14.568.v1.A.SL1-1	1486	186	1767	241	1254	156	37.5042	6.05632	43.9384	6.07557	31.6734	4.88658	0.161484	0.138275	0.15428	Q2KJF9	sp|Q2KJF9|T2EB_BOVIN General transcription factor IIE subunit 2 OS=Bos taurus GN=GTF2E2 PE=2 SV=1	5e-47
KH.S1247.1.v2.A.ND1-1	430	163	434	151	852	106	19.3492	9.46272	19.2411	6.78703	38.368	5.91996	0.48905	0.352736	0.154294	Q9P000	sp|Q9P000|COMD9_HUMAN COMM domain-containing protein 9 OS=Homo sapiens GN=COMMD9 PE=1 SV=2	5e-05
KH.L4.53.v1.A.SL1-1	851	110	972	127	1780	224	17.7589	2.96151	19.9847	2.64727	37.1742	5.80166	0.166762	0.132465	0.156067	A8WIP6	sp|A8WIP6|CDK20_DANRE Cyclin-dependent kinase 20 OS=Danio rerio GN=cdk20 PE=2 SV=1	2e-125
KH.C8.582.v1.A.SL1-1	3628	1091	4252	923	3803	479	57.9989	22.5015	66.9718	14.7388	60.8435	9.50401	0.387964	0.220075	0.156204	P10928	sp|P10928|VG10_BPT4 Baseplate structural protein Gp10 OS=Enterobacteria phage T4 GN=10 PE=1 SV=1	1.6
KH.C5.317.v1.A.nonSL6-1	387	120	340	78	408	52	18.2876	7.3158	15.8297	3.68171	19.2949	3.04978	0.400041	0.232583	0.158062	A4K2R3	sp|A4K2R3|KCNS1_GORGO Potassium voltage-gated channel subfamily S member 1 OS=Gorilla gorilla gorilla GN=KCNS1 PE=3 SV=1	3.5
KH.C8.341.v1.A.ND1-1	590	97	651	61	407	52	21.8136	4.62682	23.7139	2.25276	15.0593	2.38615	0.212107	0.0949973	0.15845	Q96IG2	sp|Q96IG2|FXL20_HUMAN F-box/LRR-repeat protein 20 OS=Homo sapiens GN=FBXL20 PE=1 SV=2	2e-21
KH.C7.319.v1.C.SL2-1	806	197	839	137	1486	190	31.3661	9.89067	32.1687	5.32543	57.8735	9.17694	0.31533	0.165547	0.158569	Q5REH2	sp|Q5REH2|ZDHC6_PONAB Palmitoyltransferase ZDHHC6 OS=Pongo abelii GN=ZDHHC6 PE=3 SV=1	5e-25
KH.C3.861.v1.C.SL1-1	2574	253	3315	398	1871	241	34.3351	4.35396	43.5672	5.303	24.9769	3.98993	0.126808	0.12172	0.159745	Q8N5D0	sp|Q8N5D0|WDTC1_HUMAN WD and tetratricopeptide repeats protein 1 OS=Homo sapiens GN=WDTC1 PE=1 SV=2	5e-99
KH.C3.180.v1.A.ND1-1	177	21	146	9	240	31	3.62794	0.555316	2.9484	0.184263	4.92304	0.788619	0.153067	0.062496	0.160189	Q9KWV5	sp|Q9KWV5|TTGD_PSEPT Toluene efflux pump periplasmic linker protein TtgD OS=Pseudomonas putida (strain DOT-T1E) GN=ttgD PE=2 SV=2	7.2
KH.L142.5.v1.A.SL1-1	440	88	636	73	672	87	8.14843	2.10251	11.6045	1.35037	12.4545	1.99968	0.258027	0.116367	0.160559	Q8IVH4	sp|Q8IVH4|MMAA_HUMAN Methylmalonic aciduria type A protein, mitochondrial OS=Homo sapiens GN=MMAA PE=1 SV=1	1e-55
KH.C1.639.v1.A.SL3-1	334	82	369	58	386	50	16.3806	5.18837	17.8302	2.84132	18.9455	3.04349	0.316739	0.159354	0.160645	Q53S58	sp|Q53S58|TM177_HUMAN Transmembrane protein 177 OS=Homo sapiens GN=TMEM177 PE=2 SV=1	1e-06
KH.C5.12.v2.A.SL2-1	1227	168	1925	274	2722	353	10.1902	1.80003	15.7512	2.27298	22.6235	3.63856	0.176644	0.144305	0.160831	P48964	sp|P48964|MPIP1_MOUSE M-phase inducer phosphatase 1 OS=Mus musculus GN=Cdc25a PE=2 SV=2	1e-30
KH.C12.500.v1.A.SL1-1	2979	943	4114	746	6896	895	52.5997	21.4812	71.5688	13.1571	121.856	19.6135	0.40839	0.183839	0.160957	Q8NFH3	sp|Q8NFH3|NUP43_HUMAN Nucleoporin Nup43 OS=Homo sapiens GN=NUP43 PE=1 SV=1	8e-29
KH.C1.1251.v1.A.SL3-1	295	59	301	34	246	32	8.53268	2.20166	8.57781	0.982316	7.12089	1.14877	0.258027	0.114518	0.161324	Q5RJK8	sp|Q5RJK8|ACBD6_RAT Acyl-CoA-binding domain-containing protein 6 OS=Rattus norvegicus GN=Acbd6 PE=2 SV=1	4e-26
KH.C5.564.v1.A.ND1-1	660	130	839	209	913	119	15.7618	4.00533	19.741	4.98559	21.8206	3.52717	0.254117	0.25255	0.161644	Q9Z254	sp|Q9Z254|GIPC1_RAT PDZ domain-containing protein GIPC1 OS=Rattus norvegicus GN=Gipc1 PE=1 SV=2	4e-63
KH.C14.581.v1.A.ND1-1	1579	288	2332	325	2272	298	14.36	3.37909	20.8953	2.95233	20.6784	3.36363	0.235312	0.141292	0.162664	A7SNN5	sp|A7SNN5|PLK4_NEMVE Serine/threonine-protein kinase PLK4 OS=Nematostella vectensis GN=v1g246408 PE=3 SV=1	7e-65
KH.C5.131.v1.A.SL1-1	276	29	343	57	312	41	6.60143	0.894872	8.08294	1.3618	7.46825	1.21711	0.135557	0.168478	0.162972	Q8JZX3	sp|Q8JZX3|POC1A_MOUSE POC1 centriolar protein homolog A OS=Mus musculus GN=Poc1a PE=2 SV=2	1e-09
KH.L149.10.v1.A.SL1-1	1664	356	2414	337	2925	385	17.6888	4.88237	25.2831	3.57837	31.1177	5.07956	0.276014	0.141532	0.163237	P41413	sp|P41413|PCSK5_RAT Proprotein convertase subtilisin/kexin type 5 OS=Rattus norvegicus GN=Pcsk5 PE=2 SV=3	1e-106
KH.C3.29.v1.C.SL1-1	6579	821	8369	2923	5602	739	123.829	19.9361	155.197	54.9541	105.521	17.2634	0.160997	0.354093	0.163601	Q4R7V3	sp|Q4R7V3|FR1OP_MACFA FGFR1 oncogene partner OS=Macaca fascicularis GN=FGFR1OP PE=2 SV=1	3e-10
KH.L116.93.v1.A.SL1-1	1851	575	2105	363	2052	272	37.1558	14.891	41.6312	7.2784	41.2224	6.77655	0.400771	0.17483	0.16439	B2VCW1	sp|B2VCW1|RS6_ERWT9 30S ribosomal protein S6 OS=Erwinia tasmaniensis (strain DSM 17950 / Et1/99) GN=rpsF PE=3 SV=1	8.3
KH.C2.448.v1.A.ND2-1	1248	131	1627	323	1318	176	12.0475	1.6315	15.4745	3.11453	12.733	2.10869	0.135423	0.201269	0.165608	P56677	sp|P56677|ST14_MOUSE Suppressor of tumorigenicity 14 protein homolog OS=Mus musculus GN=St14 PE=1 SV=2	2e-18
KH.C4.249.v1.A.SL1-1	1522	389	2750	388	3249	436	21.2599	7.01021	37.8465	5.41362	45.4184	7.55879	0.329738	0.143041	0.166426	Q9VQU9	sp|Q9VQU9|BOWEL_DROME Protein bowel OS=Drosophila melanogaster GN=bowl PE=1 SV=1	2.5
KH.C1.81.v1.A.ND1-1	1653	309	1789	238	1923	259	44.5389	10.7414	47.4923	6.40549	51.8539	8.66134	0.241168	0.134874	0.167034	Q9CR24	sp|Q9CR24|NUDT8_MOUSE Nucleoside diphosphate-linked moiety X motif 8, mitochondrial OS=Mus musculus GN=Nudt8 PE=2 SV=1	3e-08
KH.C10.100.v2.A.SL2-1	1791	597	1866	333	2472	334	59.0549	25.3962	60.6204	10.9676	81.5726	13.6687	0.430044	0.180924	0.167564	Q9CRA8	sp|Q9CRA8|EXOS5_MOUSE Exosome complex component RRP46 OS=Mus musculus GN=Exosc5 PE=1 SV=1	2e-19
KH.S695.1.v1.A.SL1-1	3779	806	3444	566	3762	509	153.398	42.2097	137.738	22.9493	152.826	25.6437	0.275165	0.166616	0.167796	Q9U501	sp|Q9U501|ELOF1_MANSE Transcription elongation factor 1 homolog OS=Manduca sexta PE=3 SV=1	2e-25
KH.C4.366.v3.A.ND3-1	801	135	1100	219	1318	179	7.85679	1.70837	10.6305	2.14568	12.9379	2.17914	0.217438	0.201843	0.168431	P41162	sp|P41162|ETV3_HUMAN ETS translocation variant 3 OS=Homo sapiens GN=ETV3 PE=1 SV=2	5e-38
KH.L84.18.v1.A.SL1-1	2975	568	3702	549	2901	394	79.1984	19.508	97.0984	14.5986	77.2881	13.018	0.246318	0.150348	0.168435	Q8IV48	sp|Q8IV48|ERI1_HUMAN 3'-5' exoribonuclease 1 OS=Homo sapiens GN=ERI1 PE=1 SV=3	3e-41
KH.C9.790.v1.A.nonSL16-1	102	22	120	32	103	14	2.08655	0.580611	2.41856	0.653864	2.10863	0.355447	0.278264	0.270353	0.168568	B7LH67	sp|B7LH67|KBAZ_ECO55 D-tagatose-1,6-bisphosphate aldolase subunit KbaZ OS=Escherichia coli (strain 55989 / EAEC) GN=kbaZ PE=3 SV=1	2
KH.C14.74.v1.A.SL1-1	2339	673	2705	850	4025	548	46.0013	17.0761	52.4148	16.6981	79.2212	13.3764	0.37121	0.318577	0.168849	Q5TFE4	sp|Q5TFE4|NT5D1_HUMAN 5'-nucleotidase domain-containing protein 1 OS=Homo sapiens GN=NT5DC1 PE=1 SV=1	2e-26
KH.C8.451.v1.A.SL2-1	1098	301	1548	250	1632	224	14.9609	5.29124	20.7814	3.40256	22.2542	3.78812	0.35367	0.163731	0.17022	Q6AYJ3	sp|Q6AYJ3|SPA6L_RAT Spermatogenesis associated 6-like protein OS=Rattus norvegicus GN=Spata6l PE=2 SV=1	8e-16
KH.C2.417.v2.A.SL1-1	343	85	418	147	415	57	7.09118	2.26714	8.51426	3.03564	8.58633	1.46257	0.319712	0.356536	0.170337	Q501Z5	sp|Q501Z5|GTPB3_DANRE tRNA modification GTPase GTPBP3, mitochondrial OS=Danio rerio GN=gtpbp3 PE=2 SV=1	3e-60
KH.C1.755.v1.A.nonSL2-1	1873	361	1565	199	1065	148	28.0938	6.98577	23.1278	2.9815	15.9867	2.7552	0.248659	0.128914	0.172344	Q3U6K5	sp|Q3U6K5|SPAT6_MOUSE Spermatogenesis-associated protein 6 OS=Mus musculus GN=Spata6 PE=1 SV=2	6.8
KH.S514.6.v2.C.SL1-1	176	34	144	47	187	26	3.28481	0.818673	2.64793	0.876201	3.4928	0.602267	0.24923	0.330901	0.172431	P0C851	sp|P0C851|PIRT_HUMAN Phosphoinositide-interacting protein OS=Homo sapiens GN=PIRT PE=2 SV=2	3e-05
KH.C2.883.v1.A.SL3-1	186	37	241	42	258	36	2.58073	0.662318	3.29453	0.582088	3.58249	0.619943	0.256639	0.176683	0.173048	Q9GKX2	sp|Q9GKX2|DHRS4_RABIT Dehydrogenase/reductase SDR family member 4 (Fragment) OS=Oryctolagus cuniculus GN=DHRS4 PE=1 SV=1	4e-48
KH.C1.461.v1.A.ND1-1	661	98	669	58	472	66	20.2692	3.87699	20.2119	1.77652	14.4848	2.51187	0.191275	0.087895	0.173414	Q20117	sp|Q20117|GSH1_CAEEL Glutamate--cysteine ligase OS=Caenorhabditis elegans GN=gcs-1 PE=1 SV=2	0.34
KH.S555.1.v1.A.nonSL1-1	130	50	119	33	157	22	2.63334	1.30668	2.37496	0.667708	3.18272	0.553102	0.496205	0.281144	0.173783	Q13585	sp|Q13585|MTR1L_HUMAN Melatonin-related receptor OS=Homo sapiens GN=GPR50 PE=1 SV=3	0.005
KH.L157.3.v1.A.nonSL4-1	584	214	560	160	697	98	14.7752	6.98503	13.959	4.04342	17.6477	3.07727	0.472754	0.289664	0.174372	Q9NPC7	sp|Q9NPC7|MYNN_HUMAN Myoneurin OS=Homo sapiens GN=MYNN PE=1 SV=1	6e-07
KH.C3.173.v1.A.ND1-1	2453	425	3811	853	4265	602	21.181	4.73448	32.4216	7.3571	36.8556	6.45155	0.223525	0.22692	0.175049	Q6ZPG2	sp|Q6ZPG2|WDR90_MOUSE WD repeat-containing protein 90 OS=Mus musculus GN=Wdr90 PE=2 SV=2	3e-37
KH.C8.523.v2.A.nonSL2-1	271	72	218	93	431	61	12.6903	4.34982	10.0579	4.35007	20.1984	3.5453	0.342766	0.432503	0.175524	Q98RY4	sp|Q98RY4|H3_GUITH Histone H3 OS=Guillardia theta PE=3 SV=3	0.003
KH.C8.472.v1.A.ND1-1	2069	382	3187	414	3165	448	21.0651	5.01765	31.9692	4.21029	32.2487	5.66109	0.238198	0.131698	0.175545	Q60988	sp|Q60988|STIL_MOUSE SCL-interrupting locus protein homolog OS=Mus musculus GN=Stil PE=1 SV=1	9e-06
KH.C2.218.v1.A.SL2-1	1250	275	1531	347	2274	322	27.8617	7.90797	33.6217	7.72567	50.7252	8.90784	0.283829	0.229782	0.17561	Q96HH4	sp|Q96HH4|TM169_HUMAN Transmembrane protein 169 OS=Homo sapiens GN=TMEM169 PE=2 SV=1	6e-24
KH.C10.590.v1.A.SL8-1	350	63	415	68	233	33	6.94498	1.61279	8.1133	1.34779	4.62695	0.81271	0.232224	0.166121	0.175647	Q9Y4W2	sp|Q9Y4W2|LAS1L_HUMAN Ribosomal biogenesis protein LAS1L OS=Homo sapiens GN=LAS1L PE=1 SV=2	0.81
KH.C2.533.v1.A.nonSL27-1	151	40	165	29	127	18	5.21104	1.78091	5.61019	0.999664	4.38618	0.770972	0.341757	0.178187	0.175773	Q2SYS4	sp|Q2SYS4|GLYA1_BURTA Serine hydroxymethyltransferase 1 OS=Burkholderia thailandensis (strain E264 / ATCC 700388 / DSM 13276 / CIP 106301) GN=glyA1 PE=3 SV=2	0.057
KH.C2.73.v1.A.nonSL24-1	130	27	135	42	141	20	3.47565	0.931302	3.55609	1.12163	3.77265	0.663653	0.267951	0.315412	0.175911	Q6DEX3	sp|Q6DEX3|NKAI4_XENTR Sodium/potassium-transporting ATPase subunit beta-1-interacting protein 4 OS=Xenopus tropicalis GN=nkain4 PE=2 SV=1	2e-13
KH.L134.29.v1.A.ND1-1	289	62	354	73	423	60	15.6825	4.34054	18.9264	3.95685	22.9717	4.04099	0.276776	0.209065	0.175911	Q2U9M7	sp|Q2U9M7|BGLH_ASPOR Probable beta-glucosidase H OS=Aspergillus oryzae (strain ATCC 42149 / RIB 40) GN=bglH PE=3 SV=2	9
KH.C4.642.v1.A.ND1-1	1432	327	1385	317	813	116	20.2853	5.97613	19.3301	4.48545	11.5256	2.03946	0.294604	0.232045	0.17695	Q3KTM2	sp|Q3KTM2|GDPD5_CHICK Glycerophosphodiester phosphodiesterase domain-containing protein 5 OS=Gallus gallus GN=GDPD5 PE=1 SV=1	8e-32
KH.L141.19.v2.A.SL4-1	460	73	866	163	497	71	8.48848	1.73792	15.7448	3.00448	9.17834	1.62611	0.204738	0.190824	0.177168	Q9D6T1	sp|Q9D6T1|TBE_MOUSE Tubulin epsilon chain OS=Mus musculus GN=Tube1 PE=2 SV=1	3e-112
KH.C3.422.v1.A.ND1-1	740	72	772	83	342	49	12.7264	1.5975	13.0809	1.42581	5.8862	1.0459	0.125526	0.108999	0.177686	0	0	0
KH.C4.294.v1.R.ND1-1	748	281	819	174	1019	146	18.2846	8.86188	19.7249	4.24857	24.9284	4.42952	0.484662	0.215391	0.17769	Q31U31	sp|Q31U31|ARGE_SHIBS Acetylornithine deacetylase OS=Shigella boydii serotype 4 (strain Sb227) GN=argE PE=3 SV=1	0.17
KH.C2.3.v1.A.SL2-1	360	84	476	106	970	139	18.4715	5.56049	24.0632	5.43268	49.8089	8.85183	0.301031	0.225767	0.177716	Q3UZP4	sp|Q3UZP4|SVIP_MOUSE Small VCP/p97-interacting protein OS=Mus musculus GN=Svip PE=2 SV=1	0.1
KH.S675.6.v1.A.nonSL2-1	376	104	467	54	348	50	13.0482	4.6562	15.9671	1.87183	12.0859	2.15354	0.356845	0.11723	0.178186	P41000	sp|P41000|CPS3_SCHPO Protein cps3 OS=Schizosaccharomyces pombe (strain 972 / ATCC 24843) GN=cps3 PE=1 SV=3	0.0002
KH.C2.1087.v1.A.SL1-1	1912	512	1718	267	1913	275	44.8011	15.4777	39.6616	6.24916	44.8592	7.99747	0.345475	0.157562	0.178279	A0JP80	sp|A0JP80|FITM2_XENTR Fat storage-inducing transmembrane protein 2 OS=Xenopus tropicalis GN=fitm2 PE=2 SV=1	5e-09
KH.C7.595.v1.A.ND1-1	1593	240	1443	310	1736	250	31.5291	6.12832	28.139	6.12867	34.386	6.14122	0.19437	0.2178	0.178597	Q5M7C7	sp|Q5M7C7|JAGN1_XENLA Protein jagunal homolog 1 OS=Xenopus laevis GN=jagn1 PE=2 SV=1	0.0001
KH.C1.897.v1.A.SL1-1	3682	617	4121	865	2539	366	68.514	14.8121	75.5518	16.0776	47.2818	8.4527	0.21619	0.212802	0.178773	Q5XGE0	sp|Q5XGE0|OGFD3_XENTR 2-oxoglutarate and iron-dependent oxygenase domain-containing protein 3 OS=Xenopus tropicalis GN=ogfod3 PE=2 SV=1	3e-37
KH.C12.505.v1.A.ND1-1	330	26	450	120	270	39	6.95655	0.707111	9.34628	2.5268	5.69612	1.02038	0.101647	0.270353	0.179137	Q9BG99	sp|Q9BG99|TREX1_BOVIN Three prime repair exonuclease 1 OS=Bos taurus GN=TREX1 PE=1 SV=1	2e-08
KH.C8.635.v1.A.SL1-1	896	184	1040	188	1023	148	13.7716	3.64862	15.7491	2.88631	15.7357	2.8233	0.264938	0.183268	0.179419	Q60414	sp|Q60414|NTCP2_CRIGR Ileal sodium/bile acid cotransporter OS=Cricetulus griseus GN=SLC10A2 PE=2 SV=1	2e-17
KH.C8.894.v1.A.ND1-1	492	160	713	93	812	118	17.3251	7.26885	24.737	3.27117	28.6156	5.15718	0.419555	0.132238	0.180223	A8P1W0	sp|A8P1W0|EFGM_COPC7 Elongation factor G, mitochondrial OS=Coprinopsis cinerea (strain Okayama-7 / 130 / ATCC MYA-4618 / FGSC 9003) GN=MEF1 PE=3 SV=1	1.1
KH.L23.6.v2.B.ND2-1	236	52	371	37	301	44	4.08126	1.16017	6.32125	0.639136	5.20936	0.944395	0.284267	0.101109	0.181288	Q9HGM9	sp|Q9HGM9|DNJC7_SCHPO DnaJ homolog subfamily C member 7 homolog OS=Schizosaccharomyces pombe (strain 972 / ATCC 24843) GN=SPBC543.02c PE=4 SV=1	0.0003
KH.L18.11.v2.A.SL2-1	554	193	624	258	896	131	13.6931	6.15436	15.1958	6.36972	22.1633	4.01866	0.449451	0.419177	0.18132	Q9H477	sp|Q9H477|RBSK_HUMAN Ribokinase OS=Homo sapiens GN=RBKS PE=1 SV=1	7e-46
KH.L171.11.v2.A.SL4-1	341	92	280	75	361	53	10.3849	3.61467	8.40138	2.28148	11.0024	2.00328	0.348071	0.27156	0.182076	Q6NW95	sp|Q6NW95|FXL15_DANRE F-box/LRR-repeat protein 15 OS=Danio rerio GN=fbxl15 PE=2 SV=2	8e-11
KH.C2.439.v2.A.SL4-2	172	49	264	58	313	46	2.4365	0.895505	3.68458	0.820681	4.43729	0.80875	0.367538	0.222734	0.182262	Q921W4	sp|Q921W4|QORL1_MOUSE Quinone oxidoreductase-like protein 1 OS=Mus musculus GN=Cryzl1 PE=2 SV=1	1e-18
KH.L108.36.v1.A.SL1-1	2436	801	3095	501	2659	391	42.4575	18.0113	53.1477	8.72216	46.38	8.4581	0.424219	0.164112	0.182365	Q5RH01	sp|Q5RH01|CNDH2_DANRE Condensin-2 complex subunit H2 OS=Danio rerio GN=ncaph2 PE=2 SV=1	3e-17
KH.C10.424.v1.A.SL1-1	2422	391	2983	527	2763	408	28.2691	5.88775	34.3034	6.14409	32.2741	5.9104	0.208275	0.17911	0.183131	Q9H4B6	sp|Q9H4B6|SAV1_HUMAN Protein salvador homolog 1 OS=Homo sapiens GN=SAV1 PE=1 SV=2	1e-29
KH.C8.249.v1.A.SL1-1	781	113	1166	184	1056	156	14.9257	2.7861	21.9548	3.51246	20.1969	3.70022	0.186665	0.159986	0.183208	Q4R7T7	sp|Q4R7T7|TBD_MACFA Tubulin delta chain OS=Macaca fascicularis GN=TUBD1 PE=2 SV=1	4e-58
KH.C12.621.v1.A.ND1-1	1694	527	1682	415	2350	348	42.9981	17.2576	42.0638	10.5219	59.6952	10.9631	0.401358	0.250141	0.183652	Q8K2C6	sp|Q8K2C6|SIR5_MOUSE NAD-dependent protein deacylase sirtuin-5, mitochondrial OS=Mus musculus GN=Sirt5 PE=1 SV=1	2e-73
KH.C4.365.v1.A.SL2-1	1404	304	1737	361	1834	272	46.992	13.127	57.2799	12.069	61.4315	11.2991	0.279345	0.210703	0.18393	Q7SZP2	sp|Q7SZP2|CA052_DANRE UPF0690 protein C1orf52 homolog OS=Danio rerio GN=zgc:65873 PE=1 SV=1	0.001
KH.C10.374.v1.A.SL3-1	1276	478	1514	235	2169	322	28.918	13.9759	33.8057	5.31979	49.1941	9.05717	0.483294	0.157364	0.184111	Q5S3G4	sp|Q5S3G4|COX5B_PIG Cytochrome c oxidase subunit 5B, mitochondrial OS=Sus scrofa GN=COX5B PE=2 SV=1	4e-05
KH.C8.118.v1.A.nonSL9-1	104	32	116	42	101	15	2.40427	0.954408	2.64213	0.969858	2.33672	0.430388	0.396964	0.367074	0.184185	Q8IXM2	sp|Q8IXM2|BAP18_HUMAN Chromatin complexes subunit BAP18 OS=Homo sapiens GN=BAP18 PE=1 SV=1	1e-10
KH.C2.749.v1.B.SL1-1	2618	731	4349	1073	5355	796	15.6394	5.63382	25.5969	6.40265	32.0145	5.90178	0.360232	0.250134	0.184347	Q80TP3	sp|Q80TP3|UBR5_MOUSE E3 ubiquitin-protein ligase UBR5 OS=Mus musculus GN=Ubr5 PE=1 SV=2	7e-50
KH.C11.436.v2.A.SL1-1	850	171	1012	361	865	129	17.4799	4.53681	20.5044	7.41543	17.8021	3.29252	0.259544	0.361651	0.184951	Q9GKX6	sp|Q9GKX6|GALM_PIG Aldose 1-epimerase OS=Sus scrofa GN=GALM PE=2 SV=1	9e-44
KH.C9.198.v1.A.SL1-1	2206	516	2294	974	3384	505	43.1944	13.0348	44.2549	19.0498	66.3113	12.2725	0.301772	0.430455	0.185074	P57093	sp|P57093|PAHX_RAT Phytanoyl-CoA dioxygenase, peroxisomal OS=Rattus norvegicus GN=Phyh PE=1 SV=2	7e-79
KH.L134.28.v1.A.ND1-1	345	97	524	56	588	88	9.7877	3.55032	14.6467	1.58693	16.6945	3.09858	0.362733	0.108348	0.185605	0	0	0
KH.S390.6.v2.A.SL1-1	2278	579	4084	946	5131	769	26.351	8.64084	46.5452	10.9306	59.3992	11.0405	0.327913	0.234838	0.185869	P09055	sp|P09055|ITB1_MOUSE Integrin beta-1 OS=Mus musculus GN=Itgb1 PE=1 SV=1	9e-60
KH.L141.77.v1.A.SL9-1	488	85	531	70	533	80	8.94677	2.01048	9.59151	1.2819	9.77933	1.82035	0.224716	0.133649	0.186143	Q6GL42	sp|Q6GL42|TM39A_XENTR Transmembrane protein 39A OS=Xenopus tropicalis GN=tmem39a PE=2 SV=1	3e-14
KH.C4.302.v1.A.SL1-1	2163	314	2883	317	2040	307	36.8121	6.89442	48.342	5.38892	34.7455	6.48471	0.187287	0.111475	0.186634	Q02401	sp|Q02401|LPH_RAT Lactase-phlorizin hydrolase OS=Rattus norvegicus GN=Lct PE=2 SV=2	5e-59
KH.C11.644.v1.A.nonSL2-1	329	90	364	67	438	66	6.50338	2.2952	7.0891	1.3229	8.66469	1.61922	0.352924	0.18661	0.186876	Q6ZVK1	sp|Q6ZVK1|T179A_HUMAN Transmembrane protein 179 OS=Homo sapiens GN=TMEM179 PE=2 SV=2	9e-07
KH.C10.17.v2.A.SL1-1	246	81	305	121	457	69	1.85207	0.786758	2.26239	0.909947	3.44329	0.644748	0.4248	0.402205	0.187248	Q9H2E6	sp|Q9H2E6|SEM6A_HUMAN Semaphorin-6A OS=Homo sapiens GN=SEMA6A PE=1 SV=2	4e-16
KH.C5.51.v1.A.SL4-1	346	76	482	102	607	92	7.33361	2.07821	10.0655	2.15949	12.8756	2.42019	0.283382	0.214544	0.187967	Q8K0T2	sp|Q8K0T2|DC2L1_MOUSE Cytoplasmic dynein 2 light intermediate chain 1 OS=Mus musculus GN=Dync2li1 PE=1 SV=1	1e-37
KH.C5.443.v1.A.ND1-1	253	47	438	77	422	64	8.90906	2.13522	15.1961	2.70839	14.8717	2.79711	0.239669	0.178229	0.188084	0	0	0
KH.C3.98.v1.C.SL1-1	289	61	321	28	395	60	6.06757	1.65227	6.64001	0.587197	8.29946	1.56346	0.272312	0.0884332	0.188381	Q9HAC7	sp|Q9HAC7|SUCHY_HUMAN Succinate--hydroxymethylglutarate CoA-transferase OS=Homo sapiens GN=C7orf10 PE=1 SV=2	2e-82
KH.C11.614.v1.A.SL1-1	1161	244	1590	214	2119	322	38.2413	10.3687	51.5993	7.04081	69.85	13.1636	0.271139	0.136452	0.188455	Q9CY94	sp|Q9CY94|PSF3_MOUSE DNA replication complex GINS protein PSF3 OS=Mus musculus GN=Gins3 PE=2 SV=1	3e-11
KH.C6.67.v1.A.SL1-1	694	152	867	355	1005	153	15.5805	4.40251	19.1773	7.96085	22.58	4.26317	0.282565	0.415118	0.188803	P04183	sp|P04183|KITH_HUMAN Thymidine kinase, cytosolic OS=Homo sapiens GN=TK1 PE=1 SV=2	8e-46
KH.C12.117.v1.A.SL1-1	524	108	644	124	641	98	12.7789	3.39797	15.4737	3.02059	15.6443	2.96624	0.265905	0.195208	0.189606	Q6PFJ1	sp|Q6PFJ1|NGDN_DANRE Neuroguidin OS=Danio rerio GN=ngdn PE=2 SV=1	6e-14
KH.C12.516.v2.R.ND2-1	506	182	627	133	712	109	5.62309	2.60934	6.86497	1.47633	7.91844	1.50338	0.46404	0.215054	0.189858	Q5W7F1	sp|Q5W7F1|ASAH2_DANRE Neutral ceramidase OS=Danio rerio GN=asah2 PE=1 SV=1	7e-78
KH.C3.388.v2.A.SL2-1	262	52	211	43	254	39	11.9802	3.06762	9.50587	1.964	11.6234	2.21333	0.256057	0.206609	0.190421	Q5XIC0	sp|Q5XIC0|ECI2_RAT Enoyl-CoA delta isomerase 2, mitochondrial OS=Rattus norvegicus GN=Eci2 PE=1 SV=1	6e-05
KH.C2.550.v1.A.nonSL2-1	284	81	275	61	397	61	9.77919	3.59835	9.32961	2.09808	13.6808	2.60695	0.36796	0.224885	0.190556	Q9D7M8	sp|Q9D7M8|RPB4_MOUSE DNA-directed RNA polymerase II subunit RPB4 OS=Mus musculus GN=Polr2d PE=2 SV=2	6e-44
KH.L18.20.v2.A.SL1-1	142	46	230	56	234	36	2.68571	1.12244	4.28592	1.05795	4.42916	0.845068	0.41793	0.246844	0.190796	P15056	sp|P15056|BRAF_HUMAN Serine/threonine-protein kinase B-raf OS=Homo sapiens GN=BRAF PE=1 SV=4	2e-10
KH.L65.2.v1.A.ND2-1	438	44	678	99	582	90	6.36701	0.825179	9.71041	1.43749	8.46681	1.62376	0.129602	0.148036	0.19178	Q91ZX7	sp|Q91ZX7|LRP1_MOUSE Prolow-density lipoprotein receptor-related protein 1 OS=Mus musculus GN=Lrp1 PE=1 SV=1	0.21
KH.C4.782.v1.B.SL2-1	1348	142	1611	239	582	90	94.6146	12.8585	111.406	16.7562	40.8815	7.84025	0.135904	0.150406	0.19178	Q3MFA4	sp|Q3MFA4|RL15_ANAVT 50S ribosomal protein L15 OS=Anabaena variabilis (strain ATCC 29413 / PCC 7937) GN=rplO PE=3 SV=1	1.6
KH.C2.301.v1.A.nonSL5-1	283	73	357	71	407	63	11.7327	3.90452	14.5823	2.94021	16.8865	3.24168	0.33279	0.201629	0.191968	Q9CR27	sp|Q9CR27|CCD53_MOUSE WASH complex subunit CCDC53 OS=Mus musculus GN=Ccdc53 PE=2 SV=1	2e-13
KH.L116.56.v1.A.SL1-1	4409	648	5056	635	5323	828	67.1362	12.7299	75.8525	9.65826	81.1163	15.6482	0.189614	0.12733	0.192911	Q6DFQ7	sp|Q6DFQ7|TM198_XENTR Transmembrane protein 198 OS=Xenopus tropicalis GN=tmem198 PE=1 SV=1	1e-25
KH.C2.921.v1.A.SL2-1	899	171	975	153	837	131	29.0272	7.12322	31.0168	4.93453	27.0462	5.24972	0.245398	0.159092	0.194102	Q5R610	sp|Q5R610|COMD2_PONAB COMM domain-containing protein 2 OS=Pongo abelii GN=COMMD2 PE=2 SV=1	7e-21
KH.C1.215.v2.A.SL3-1	466	167	480	139	696	109	5.60095	2.58956	5.68412	1.66878	8.37183	1.626	0.462344	0.293586	0.194223	P78348	sp|P78348|ASIC1_HUMAN Acid-sensing ion channel 1 OS=Homo sapiens GN=ASIC1 PE=1 SV=3	6e-98
KH.C11.364.v1.A.ND1-1	519	172	622	205	849	133	8.22928	3.5185	9.71698	3.24681	13.4722	2.61737	0.427558	0.334138	0.19428	O88307	sp|O88307|SORL_MOUSE Sortilin-related receptor OS=Mus musculus GN=Sorl1 PE=1 SV=3	4e-13
KH.C2.923.v1.A.SL1-1	1622	421	1869	262	1875	294	36.3619	12.1762	41.2811	5.86686	42.0661	8.18016	0.334862	0.14212	0.19446	Q5PPK9	sp|Q5PPK9|TSSC1_RAT Protein TSSC1 OS=Rattus norvegicus GN=Tssc1 PE=2 SV=1	1e-62
KH.C7.686.v1.A.ND1-1	368	78	540	133	610	96	31.0094	8.47959	44.8318	11.1945	51.4412	10.04	0.273452	0.249701	0.195175	B5DE73	sp|B5DE73|ASPH2_XENTR Aspartate beta-hydroxylase domain-containing protein 2 OS=Xenopus tropicalis GN=asphd2 PE=2 SV=1	1e-05
KH.C5.64.v1.A.nonSL2-1	1051	225	1422	197	704	111	15.3641	4.24347	20.481	2.8766	10.2994	2.01394	0.276194	0.140452	0.195539	Q567C6	sp|Q567C6|ZN367_DANRE Zinc finger protein 367 OS=Danio rerio GN=znf367 PE=2 SV=1	5e-34
KH.L18.108.v2.A.SL2-1	783	149	817	107	1155	183	30.8182	7.56599	31.6821	4.20666	45.4949	8.93953	0.245504	0.132777	0.196495	Q8BGF8	sp|Q8BGF8|S35D3_MOUSE Solute carrier family 35 member D3 OS=Mus musculus GN=Slc35d3 PE=2 SV=1	0.003
KH.C7.101.v1.C.nonSL2-1	315	50	412	62	290	46	12.0326	2.46406	15.5057	2.36564	11.0862	2.18084	0.204783	0.152566	0.196718	P34730	sp|P34730|BMH2_YEAST Protein BMH2 OS=Saccharomyces cerevisiae (strain ATCC 204508 / S288c) GN=BMH2 PE=1 SV=3	2e-22
KH.C7.321.v2.C.ND3-1	565	91	648	92	825	131	19.7837	4.11088	22.3553	3.21778	28.91	5.69311	0.207791	0.143938	0.196925	Q9QZX9	sp|Q9QZX9|CEP19_RAT Centrosomal protein of 19 kDa OS=Rattus norvegicus GN=Cep19 PE=2 SV=2	1e-17
KH.C8.294.v1.A.SL3-1	1227	468	1188	285	1585	252	51.3485	25.2676	48.9831	11.9134	66.3816	13.0889	0.49208	0.243215	0.197176	Q8JZS9	sp|Q8JZS9|RM48_MOUSE 39S ribosomal protein L48, mitochondrial OS=Mus musculus GN=Mrpl48 PE=2 SV=1	4e-09
KH.C2.397.v2.A.ND1-1	119	25	207	39	257	41	2.54481	0.689735	4.36139	0.833069	5.50017	1.0882	0.271036	0.19101	0.197849	B5BP48	sp|B5BP48|YP54_SCHPO Putative alpha-ketoglutarate-dependent sulfonate dioxygenase OS=Schizosaccharomyces pombe (strain 972 / ATCC 24843) GN=SPBC460.04c PE=3 SV=1	0.19
KH.C4.275.v4.A.nonSL5-1	253	63	383	96	400	64	3.83367	1.2316	5.71794	1.45303	6.06583	1.20363	0.321258	0.254118	0.198428	O43734	sp|O43734|CIKS_HUMAN Adapter protein CIKS OS=Homo sapiens GN=TRAF3IP2 PE=1 SV=3	2e-08
KH.C2.959.v1.A.ND1-1	3846	1039	5820	1091	4667	747	30.7815	10.7283	45.8934	8.72197	37.3813	7.42028	0.34853	0.190048	0.198503	Q2M389	sp|Q2M389|WASH7_HUMAN WASH complex subunit 7 OS=Homo sapiens GN=KIAA1033 PE=1 SV=2	0
KH.L70.3.v1.A.ND1-1	1101	194	1928	503	1162	186	12.1743	2.76753	21.0044	5.55563	12.8587	2.55263	0.227326	0.264499	0.198514	A7GCK7	sp|A7GCK7|PSUG_CLOBL Pseudouridine-5'-phosphate glycosidase OS=Clostridium botulinum (strain Langeland / NCTC 10281 / Type F) GN=psuG PE=3 SV=1	9e-44
KH.C14.445.v1.A.ND1-1	536	113	518	66	381	61	14.9741	4.07277	14.2578	1.84175	10.6522	2.11507	0.271987	0.129174	0.198558	Q08D62	sp|Q08D62|MAEL_XENTR Protein maelstrom homolog OS=Xenopus tropicalis GN=mael PE=2 SV=1	2.8
KH.C10.386.v1.A.SL1-1	152	53	191	42	181	29	5.92261	2.66428	7.33245	1.63466	7.05803	1.40245	0.449849	0.222935	0.198702	P93294	sp|P93294|M320_ARATH Uncharacterized mitochondrial protein AtMg00320 OS=Arabidopsis thaliana GN=AtMg00320 PE=4 SV=1	1
KH.C4.758.v2.A.SL2-1	345	102	413	166	423	68	18.9529	7.2292	22.3538	9.10904	23.2558	4.63643	0.381431	0.407493	0.199366	A7SM54	sp|A7SM54|UFC1_NEMVE Ubiquitin-fold modifier-conjugating enzyme 1 OS=Nematostella vectensis GN=v1g214407 PE=3 SV=1	2e-43
KH.C7.27.v1.C.SL1-1	764	229	766	196	1026	165	21.1348	8.17289	20.8776	5.4159	28.4046	5.66511	0.386702	0.259412	0.199444	Q14152	sp|Q14152|EIF3A_HUMAN Eukaryotic translation initiation factor 3 subunit A OS=Homo sapiens GN=EIF3A PE=1 SV=1	0.002
KH.C3.639.v1.C.nonSL2-1	1996	762	2428	368	2169	349	35.9369	17.6998	43.07	6.61815	39.0818	7.79873	0.492526	0.15366	0.199549	O54992	sp|O54992|MAPK5_MOUSE MAP kinase-activated protein kinase 5 OS=Mus musculus GN=Mapkapk5 PE=1 SV=1	2e-77
KH.C5.428.v1.A.ND1-1	1537	517	1824	221	2245	362	23.2333	10.0824	27.165	3.33687	33.9617	6.79149	0.433961	0.122837	0.199975	Q6DFJ9	sp|Q6DFJ9|CCNJ_XENLA Cyclin-J OS=Xenopus laevis GN=ccnj PE=2 SV=1	3e-23
KH.L106.18.v1.A.SL4-1	301	116	407	69	334	54	3.76476	1.87182	5.01547	0.862043	4.18074	0.838269	0.497194	0.171877	0.200508	F1N2W9	sp|F1N2W9|MCM9_BOVIN DNA helicase MCM9 OS=Bos taurus GN=MCM9 PE=3 SV=2	2e-113
KH.L36.6.v2.A.SL3-1	824	193	1010	174	1428	231	12.7342	3.84801	15.3784	2.68598	22.0855	4.43073	0.302179	0.174659	0.200617	P11166	sp|P11166|GTR1_HUMAN Solute carrier family 2, facilitated glucose transporter member 1 OS=Homo sapiens GN=SLC2A1 PE=1 SV=2	0.0002
KH.L34.11.v1.A.SL1-1	1592	594	1857	498	2417	391	38.5523	18.5579	44.3063	12.0461	58.5759	11.7518	0.481369	0.271882	0.200624	Q9BY49	sp|Q9BY49|PECR_HUMAN Peroxisomal trans-2-enoyl-CoA reductase OS=Homo sapiens GN=PECR PE=1 SV=2	2e-54
KH.C7.644.v1.R.ND1-1	371	102	470	80	438	71	6.21538	2.20459	7.7578	1.33873	7.34351	1.47629	0.3547	0.172566	0.201033	Q2HZX7	sp|Q2HZX7|FUZZY_XENTR Protein fuzzy homolog OS=Xenopus tropicalis GN=fuz PE=1 SV=1	4e-20
KH.C9.278.v2.A.nonSL3-1	147	55	171	67	185	30	2.25606	1.089	2.58568	1.02711	2.84145	0.571443	0.482703	0.397229	0.20111	Q9STV0	sp|Q9STV0|GWD2_ARATH Alpha-glucan water dikinase 2 OS=Arabidopsis thaliana GN=GWD2 PE=2 SV=3	1.1
KH.L141.66.v1.A.SL1-1	1871	342	2577	322	2139	347	35.4517	8.36034	48.1088	6.09436	40.5611	8.16041	0.235823	0.126679	0.201188	Q9UIC8	sp|Q9UIC8|LCMT1_HUMAN Leucine carboxyl methyltransferase 1 OS=Homo sapiens GN=LCMT1 PE=1 SV=2	2e-36
KH.C7.568.v1.A.ND2-1	353	84	504	78	394	64	4.63908	1.4242	6.52581	1.02391	5.1819	1.04389	0.307	0.156901	0.20145	Q62413	sp|Q62413|EPHA6_MOUSE Ephrin type-A receptor 6 OS=Mus musculus GN=Epha6 PE=2 SV=2	5e-71
KH.C9.270.v1.A.nonSL6-1	196	40	244	51	123	20	5.47562	1.44169	6.71604	1.42317	3.43888	0.693467	0.263292	0.211906	0.201655	P03793	sp|P03793|Y16_BPT7 Uncharacterized gene 1.6 protein OS=Enterobacteria phage T7 GN=1.6 PE=4 SV=1	9.3
KH.C1.843.v1.A.nonSL12-1	193	72	161	30	147	24	4.98843	2.4009	4.09995	0.774527	3.80241	0.769904	0.481293	0.188911	0.202478	Q2TBK2	sp|Q2TBK2|RM09_BOVIN 39S ribosomal protein L9, mitochondrial OS=Bos taurus GN=MRPL9 PE=2 SV=2	1.2
KH.C3.40.v2.C.SL2-1	657	109	1082	265	1094	179	8.24064	1.76383	13.3712	3.32009	13.7325	2.78655	0.21404	0.248302	0.202917	A0JP70	sp|A0JP70|WDR90_XENTR WD repeat-containing protein 90 OS=Xenopus tropicalis GN=wdr90 PE=2 SV=1	6e-59
KH.C5.648.v1.B.ND1-1	304	90	612	161	1019	167	5.52131	2.10885	10.9513	2.92081	18.5216	3.76447	0.381947	0.266709	0.203248	Q96NW7	sp|Q96NW7|LRRC7_HUMAN Leucine-rich repeat-containing protein 7 OS=Homo sapiens GN=LRRC7 PE=1 SV=1	1e-51
KH.L9.32.v1.A.nonSL8-1	499	184	503	160	790	130	8.03092	3.82047	7.97589	2.57214	12.7241	2.59673	0.47572	0.322489	0.20408	Q8AVL0	sp|Q8AVL0|C19L1_XENLA CWF19-like protein 1 OS=Xenopus laevis GN=cwf19l1 PE=2 SV=1	2e-75
KH.C14.443.v1.C.nonSL4-1	229	54	209	85	243	40	6.21874	1.89189	5.5919	2.30566	6.60402	1.34817	0.304223	0.412321	0.204144	Q8R1F5	sp|Q8R1F5|HYI_MOUSE Putative hydroxypyruvate isomerase OS=Mus musculus GN=Hyi PE=1 SV=2	3e-30
KH.C11.572.v1.A.nonSL3-1	274	101	255	80	170	28	7.62045	3.62398	6.98742	2.22244	4.73167	0.966512	0.47556	0.318062	0.204264	Q5XJ97	sp|Q5XJ97|C1D_DANRE Nuclear nucleic acid-binding protein C1D OS=Danio rerio GN=c1d PE=2 SV=1	9e-19
KH.C2.269.v1.A.SL2-1	1873	364	2343	514	3078	509	20.8665	5.23176	25.7176	5.71984	34.3176	7.03799	0.250725	0.222409	0.205084	A4IIM2	sp|A4IIM2|CELF2_XENTR CUGBP Elav-like family member 2 OS=Xenopus tropicalis GN=celf2 PE=2 SV=1	4e-55
KH.L37.37.v1.A.SL1-1	1735	494	2166	417	1342	222	48.3401	17.757	59.4583	11.6052	37.4193	7.67679	0.367335	0.195182	0.205156	P40358	sp|P40358|JEM1_YEAST DnaJ-like chaperone JEM1 OS=Saccharomyces cerevisiae (strain ATCC 204508 / S288c) GN=JEM1 PE=1 SV=3	6e-09
KH.C3.66.v1.A.SL3-1	974	321	848	174	930	154	42.357	18.0097	36.3336	7.5583	40.4748	8.312	0.425187	0.208025	0.205362	Q9GLN5	sp|Q9GLN5|BIRC5_PIG Baculoviral IAP repeat-containing protein 5 OS=Sus scrofa GN=BIRC5 PE=2 SV=1	4e-12
KH.C4.540.v1.A.nonSL6-1	187	72	146	50	265	44	11.1389	5.5331	8.56842	2.97496	15.7973	3.25292	0.496736	0.3472	0.205916	Q8VC85	sp|Q8VC85|LSM1_MOUSE U6 snRNA-associated Sm-like protein LSm1 OS=Mus musculus GN=Lsm1 PE=2 SV=1	3e-18
KH.C8.108.v1.A.ND1-1	996	276	838	161	1051	175	28.9703	10.3571	24.0151	4.67767	30.5937	6.31759	0.357507	0.19478	0.206499	Q00IB7	sp|Q00IB7|PKHH1_DANRE Pleckstrin homology domain-containing family H member 1 OS=Danio rerio GN=plekhh1 PE=2 SV=1	1.1
KH.C5.471.v1.A.nonSL7-1	188	58	205	52	198	33	3.6788	1.46423	3.95229	1.01639	3.87747	0.801458	0.39802	0.257165	0.206696	Q5RB73	sp|Q5RB73|MTU1_PONAB Mitochondrial tRNA-specific 2-thiouridylase 1 OS=Pongo abelii GN=TRMU PE=2 SV=1	6e-58
KH.C3.709.v1.A.SL1-1	3371	661	3724	522	5119	855	66.3818	16.7929	72.2514	10.2676	100.881	20.8966	0.252975	0.14211	0.20714	P08910	sp|P08910|ABHD2_HUMAN Abhydrolase domain-containing protein 2 OS=Homo sapiens GN=ABHD2 PE=2 SV=1	4e-47
KH.L37.1.v1.A.nonSL3-1	1080	391	1083	242	1250	209	21.6933	10.1324	21.4327	4.8554	25.1273	5.21034	0.467076	0.226542	0.207357	Q6P4M5	sp|Q6P4M5|GFOD1_XENTR Glucose-fructose oxidoreductase domain-containing protein 1 OS=Xenopus tropicalis GN=gfod1 PE=2 SV=1	5e-47
KH.C12.523.v1.B.ND1-1	227	72	548	60	592	99	3.39503	1.38926	8.07504	0.89635	8.86084	1.83769	0.409205	0.111003	0.207394	P16582	sp|P16582|LSHR_PIG Lutropin-choriogonadotropic hormone receptor OS=Sus scrofa GN=LHCGR PE=2 SV=1	1e-36
KH.C1.1289.v1.A.ND1-1	554	196	601	99	525	88	14.9921	6.84294	16.0241	2.67606	14.2183	2.95565	0.456437	0.167003	0.207877	Q1LZ78	sp|Q1LZ78|NTPCR_BOVIN Cancer-related nucleoside-triphosphatase homolog OS=Bos taurus GN=NTPCR PE=2 SV=1	1e-25
KH.C3.75.v1.C.ND1-1	1939	207	1784	212	1264	212	30.2512	4.16648	27.4224	3.30377	19.7355	4.10506	0.137729	0.120477	0.208004	Q5U4T9	sp|Q5U4T9|MBOA7_XENLA Lysophospholipid acyltransferase 7 OS=Xenopus laevis GN=mboat7 PE=2 SV=1	4e-09
KH.L4.40.v1.A.nonSL8-1	280	95	297	60	154	26	6.28609	2.75157	6.56939	1.3455	3.46002	0.72446	0.437724	0.204813	0.20938	Q2TBL8	sp|Q2TBL8|CDK10_BOVIN Cyclin-dependent kinase 10 OS=Bos taurus GN=CDK10 PE=2 SV=1	6e-94
KH.L152.54.v1.A.SL1-1	4121	1129	5344	1067	5001	845	61.4566	21.7217	78.5197	15.8942	74.6377	15.6402	0.353448	0.202423	0.209548	Q15464	sp|Q15464|SHB_HUMAN SH2 domain-containing adapter protein B OS=Homo sapiens GN=SHB PE=1 SV=2	4e-14
KH.L92.10.v1.A.SL1-1	2850	828	3745	703	4313	731	45.5614	17.0772	58.9862	11.2258	69.0029	14.504	0.374818	0.190312	0.210194	Q14181	sp|Q14181|DPOA2_HUMAN DNA polymerase alpha subunit B OS=Homo sapiens GN=POLA2 PE=1 SV=2	2e-29
KH.C1.1200.v1.A.nonSL2-1	142	19	115	24	159	27	5.0403	0.870074	4.02172	0.850919	5.64808	1.18946	0.172623	0.211581	0.210596	0	0	0
KH.C3.740.v1.A.nonSL2-1	972	196	1063	135	753	128	52.289	13.603	56.3409	7.25416	40.5392	8.5462	0.26015	0.128755	0.210813	O93530	sp|O93530|WRN_XENLA Werner syndrome ATP-dependent helicase homolog OS=Xenopus laevis GN=wrn PE=2 SV=1	2e-11
KH.L131.12.v1.A.SL2-1	453	116	683	161	588	100	6.92159	2.28665	10.2819	2.45721	8.99126	1.89638	0.330365	0.238983	0.210914	Q5SVQ0	sp|Q5SVQ0|KAT7_MOUSE Histone acetyltransferase KAT7 OS=Mus musculus GN=Kat7 PE=2 SV=1	2e-106
KH.C12.173.v1.A.ND1-1	1691	315	3293	599	1710	291	16.5761	3.98367	31.8037	5.86509	16.7753	3.54039	0.240326	0.184416	0.211048	A6QLC7	sp|A6QLC7|TPC11_BOVIN Trafficking protein particle complex subunit 11 OS=Bos taurus GN=TRAPPC11 PE=2 SV=1	1e-54
KH.L170.10.v1.A.SL1-1	889	256	1197	318	1568	267	9.61805	3.57322	12.7593	3.43654	16.9772	3.58522	0.371512	0.269337	0.211178	Q96B86	sp|Q96B86|RGMA_HUMAN Repulsive guidance molecule A OS=Homo sapiens GN=RGMA PE=1 SV=3	2e-27
KH.C10.299.v1.A.nonSL3-1	501	143	392	104	428	73	21.4868	7.91233	16.5641	4.45529	18.3702	3.88576	0.368241	0.268974	0.211525	Q9NHD5	sp|Q9NHD5|SAN_DROME Probable N-acetyltransferase san OS=Drosophila melanogaster GN=san PE=1 SV=1	4e-29
KH.C7.170.v1.A.nonSL2-1	1011	161	1367	209	1272	217	12.6248	2.59378	16.8185	2.60692	15.8963	3.36319	0.205451	0.155003	0.211571	Q28DH9	sp|Q28DH9|CEP76_XENTR Centrosomal protein of 76 kDa OS=Xenopus tropicalis GN=cep76 PE=2 SV=1	1e-104
KH.C1.643.v1.A.SL1-1	967	184	913	181	661	113	27.9439	6.85981	25.9942	5.22453	19.116	4.05282	0.245485	0.200988	0.212012	Q58D49	sp|Q58D49|MMAB_BOVIN Cob(I)yrinic acid a,c-diamide adenosyltransferase, mitochondrial OS=Bos taurus GN=MMAB PE=2 SV=1	1e-30
KH.L173.9.v1.A.SL1-1	3390	848	4412	1137	4417	756	93.6124	30.2109	120.037	31.3619	122.067	25.9104	0.322723	0.261269	0.212265	Q5RBB8	sp|Q5RBB8|SDS3_PONAB Sin3 histone deacetylase corepressor complex component SDS3 OS=Pongo abelii GN=SUDS3 PE=2 SV=1	3e-26
KH.C8.752.v1.A.nonSL1-1	112	38	150	21	198	34	5.09882	2.23187	6.72805	0.954948	9.02094	1.9211	0.437724	0.141935	0.21296	Q96CD2	sp|Q96CD2|COAC_HUMAN Phosphopantothenoylcysteine decarboxylase OS=Homo sapiens GN=PPCDC PE=1 SV=2	5e-38
KH.C1.923.v1.A.ND1-1	429	94	421	38	262	45	17.3236	4.89715	16.7498	1.53276	10.5881	2.25534	0.282686	0.091509	0.213007	P34095	sp|P34095|PFPA_ENTHI Pore-forming peptide ameobapore A OS=Entamoeba histolytica PE=1 SV=1	5.7
KH.C9.866.v1.A.SL1-1	5823	1837	6524	1316	7196	1237	95.9504	39.052	105.916	21.6603	118.666	25.2981	0.407002	0.204505	0.213188	Q9P2S5	sp|Q9P2S5|WRP73_HUMAN WD repeat-containing protein WRAP73 OS=Homo sapiens GN=WRAP73 PE=2 SV=1	1e-82
KH.S1094.2.v1.A.ND1-1	1807	523	2559	994	3373	581	33.1092	12.3631	46.1963	18.1922	61.8503	13.2125	0.373403	0.393803	0.213621	Q90744	sp|Q90744|NAGAB_CHICK Alpha-N-acetylgalactosaminidase OS=Gallus gallus GN=NAGA PE=1 SV=1	1e-80
KH.L149.5.v1.A.SL1-1	846	107	895	221	528	91	26.0448	4.2498	27.1469	6.79598	16.2675	3.47705	0.163173	0.250341	0.213742	Q6XYX3	sp|Q6XYX3|RL6_SPIKU 50S ribosomal protein L6 OS=Spiroplasma kunkelii GN=rplF PE=3 SV=1	0.21
KH.C8.21.v1.A.SL1-1	580	109	912	204	794	137	8.633	2.09312	13.3744	3.033	11.8274	2.53089	0.242456	0.226776	0.213985	Q1RMT8	sp|Q1RMT8|IRAK4_BOVIN Interleukin-1 receptor-associated kinase 4 OS=Bos taurus GN=IRAK4 PE=2 SV=1	5e-21
KH.C2.67.v1.A.ND1-1	1047	154	975	220	1008	174	30.2838	5.7467	27.7853	6.35617	29.1783	6.24643	0.189762	0.22876	0.214078	Q9W0Y2	sp|Q9W0Y2|YS11_DROME Putative gamma-glutamylcyclotransferase CG2811 OS=Drosophila melanogaster GN=CG2811 PE=2 SV=2	1e-10
KH.C14.561.v1.A.SL2-1	667	246	571	124	913	158	25.4472	12.1083	21.4633	4.72547	34.8595	7.48153	0.475821	0.220165	0.21462	Q63829	sp|Q63829|COMD3_MOUSE COMM domain-containing protein 3 OS=Mus musculus GN=Commd3 PE=2 SV=1	5e-09
KH.L152.23.v1.A.SL1-1	507	182	538	120	300	52	11.7295	5.43224	12.2631	2.77308	6.94592	1.49312	0.463125	0.226132	0.214964	Q4V348	sp|Q4V348|Z658B_HUMAN Zinc finger protein 658B OS=Homo sapiens GN=ZNF658B PE=2 SV=1	1e-145
KH.C3.916.v1.A.SL1-1	1177	152	2206	229	1619	281	13.0518	2.17456	24.1016	2.53652	17.967	3.8674	0.16661	0.105243	0.21525	Q9D7H2	sp|Q9D7H2|WDR5B_MOUSE WD repeat-containing protein 5B OS=Mus musculus GN=Wdr5b PE=1 SV=1	0.0002
KH.C2.858.v1.A.SL1-1	2021	290	2144	209	2065	359	36.0944	6.68199	37.7263	3.72845	36.9087	7.95768	0.185125	0.0988289	0.215604	Q68EJ0	sp|Q68EJ0|NB5R4_RAT Cytochrome b5 reductase 4 OS=Rattus norvegicus GN=Cyb5r4 PE=1 SV=2	1e-17
KH.C12.545.v1.A.ND1-1	369	124	430	86	437	76	7.84786	3.40236	9.01031	1.82697	9.30126	2.00612	0.433541	0.202765	0.215683	Q6DCU7	sp|Q6DCU7|HIKES_XENLA Protein Hikeshi OS=Xenopus laevis PE=2 SV=1	2e-20
KH.C3.521.v2.B.ND1-1	1788	646	1649	203	1555	271	46.7976	21.8134	42.5229	5.30714	40.7307	8.80326	0.466122	0.124807	0.216134	P41500	sp|P41500|ACYP1_BOVIN Acylphosphatase-1 OS=Bos taurus GN=ACYP1 PE=1 SV=2	1e-11
KH.L96.29.v1.A.SL1-1	3379	1269	3704	754	3653	638	64.2603	31.1351	69.402	14.323	69.5248	15.0589	0.484516	0.206378	0.216598	Q6NU94	sp|Q6NU94|TRMB_XENLA tRNA (guanine-N(7)-)-methyltransferase OS=Xenopus laevis GN=mettl1 PE=2 SV=1	8e-65
KH.L18.105.v1.B.SL1-1	698	198	670	184	1034	182	17.8923	6.54803	16.9213	4.71127	26.5257	5.79031	0.365969	0.278423	0.21829	Q7SYR1	sp|Q7SYR1|OSGEP_XENLA Probable tRNA threonylcarbamoyladenosine biosynthesis protein osgep OS=Xenopus laevis GN=osgep PE=2 SV=1	1e-121
KH.C14.212.v2.A.SL1-1	1119	166	1275	218	801	141	10.0677	1.92682	11.302	1.95913	7.21218	1.57448	0.191387	0.173344	0.218308	Q13472	sp|Q13472|TOP3A_HUMAN DNA topoisomerase 3-alpha OS=Homo sapiens GN=TOP3A PE=1 SV=1	5e-136
KH.C1.159.v1.A.nonSL1-1	136	32	234	62	210	37	3.57157	1.08419	6.05456	1.62638	5.51919	1.20598	0.303561	0.26862	0.218507	Q26263	sp|Q26263|DPN_DROME Protein deadpan OS=Drosophila melanogaster GN=dpn PE=1 SV=2	3e-08
KH.C5.315.v1.A.nonSL3-1	1018	259	1461	501	850	150	10.0106	3.28582	14.1549	4.92104	8.36497	1.83071	0.328236	0.347656	0.218855	Q7ZYB4	sp|Q7ZYB4|PAIP1_XENLA Polyadenylate-binding protein-interacting protein 1 OS=Xenopus laevis GN=paip1 PE=1 SV=1	0.011
KH.C6.174.v1.A.SL1-1	676	182	637	155	645	114	19.0048	6.6012	17.6442	4.35269	18.1473	3.97778	0.347343	0.246692	0.219194	Q9Y6I9	sp|Q9Y6I9|TX264_HUMAN Testis-expressed sequence 264 protein OS=Homo sapiens GN=TEX264 PE=1 SV=1	2e-08
KH.L9.9.v1.A.ND1-1	1370	308	1882	249	1824	323	22.2795	6.46203	30.1544	4.04476	29.6855	6.51937	0.290044	0.134135	0.219615	P55115	sp|P55115|NAS15_CAEEL Zinc metalloproteinase nas-15 OS=Caenorhabditis elegans GN=nas-15 PE=2 SV=2	2e-20
KH.C6.130.v1.A.SL1-1	1242	226	1116	155	956	170	33.2344	7.80205	29.4223	4.14292	25.6011	5.64591	0.234758	0.140809	0.220533	Q9R0M5	sp|Q9R0M5|TPK1_MOUSE Thiamin pyrophosphokinase 1 OS=Mus musculus GN=Tpk1 PE=1 SV=1	4e-15
KH.C11.509.v1.A.ND1-1	527	42	485	97	416	74	10.7452	1.10481	9.74295	1.97553	8.4885	1.87263	0.102819	0.202765	0.220608	Q24342	sp|Q24342|FNG_DROME Fringe glycosyltransferase OS=Drosophila melanogaster GN=fng PE=1 SV=1	1e-37
KH.L24.20.v3.A.ND2-1	204	47	563	61	539	96	1.41809	0.421508	3.85592	0.423557	3.74971	0.828253	0.297236	0.109846	0.220885	Q99715	sp|Q99715|COCA1_HUMAN Collagen alpha-1(XII) chain OS=Homo sapiens GN=COL12A1 PE=1 SV=2	1e-23
KH.C5.174.v1.A.nonSL5-1	310	98	313	58	241	43	5.46121	2.22735	5.43273	1.02062	4.24893	0.940188	0.407848	0.187865	0.221276	A4QN56	sp|A4QN56|NAGT1_DANRE Sodium-dependent glucose transporter 1 OS=Danio rerio GN=naglt1 PE=2 SV=1	0.005
KH.L75.10.v1.A.ND1-1	242	50	302	59	297	53	7.60068	2.02601	9.34524	1.85096	9.33531	2.06601	0.266556	0.198065	0.221311	Q9DH90	sp|Q9DH90|VG81_GAHVM Uncharacterized gene 81 protein OS=Gallid herpesvirus 2 (strain Chicken/Md5/ATCC VR-987) GN=MDV103 PE=4 SV=1	1.7
KH.C12.112.v2.R.ND2-1	589	91	592	142	409	73	7.34919	1.46487	7.27767	1.76979	5.1072	1.13049	0.199324	0.243181	0.221352	O16025	sp|O16025|AOSL_PLEHO Allene oxide synthase-lipoxygenase protein OS=Plexaura homomalla PE=1 SV=1	2e-28
KH.C11.248.v1.A.SL2-1	697	230	869	212	319	57	10.1083	4.30338	12.4169	3.07109	4.62992	1.02598	0.425725	0.247331	0.221599	Q3KRD0	sp|Q3KRD0|SYDM_RAT Aspartate--tRNA ligase, mitochondrial OS=Rattus norvegicus GN=Dars2 PE=1 SV=1	2e-50
KH.C12.283.v1.A.nonSL14-1	316	111	331	133	576	103	11.8096	5.35188	12.1877	4.96489	21.543	4.77754	0.45318	0.407367	0.221768	Q6J3Q7	sp|Q6J3Q7|COX17_CANFA Cytochrome c oxidase copper chaperone OS=Canis familiaris GN=COX17 PE=3 SV=3	3e-11
KH.L116.63.v1.A.nonSL3-1	1613	427	2043	481	1739	312	51.1777	17.4787	63.8647	15.244	55.218	12.2863	0.341529	0.238693	0.222504	Q3T197	sp|Q3T197|CX056_BOVIN UPF0428 protein CXorf56 homolog OS=Bos taurus PE=2 SV=1	1e-38
KH.L124.18.v1.A.SL1-1	634	147	994	156	1397	251	5.31645	1.59032	8.21231	1.30667	11.7237	2.61231	0.299132	0.159111	0.222823	Q9VFH6	sp|Q9VFH6|CEP78_DROME Protein Cep78 homolog OS=Drosophila melanogaster GN=CG7886 PE=1 SV=2	4.9
KH.S460.3.v1.A.SL1-1	3541	220	4301	521	1691	305	45.5158	3.64832	54.4693	6.68933	21.7528	4.86581	0.0801551	0.122809	0.223686	Q2KHY1	sp|Q2KHY1|CPNE6_BOVIN Copine-6 OS=Bos taurus GN=CPNE6 PE=2 SV=1	3e-68
KH.C9.238.v1.C.ND1-1	252	90	271	85	133	24	29.2373	13.4714	30.978	9.85066	15.4427	3.45595	0.460762	0.317989	0.223791	P51111	sp|P51111|HD_RAT Huntingtin OS=Rattus norvegicus GN=Htt PE=1 SV=1	0.72
KH.L18.7.v1.A.SL1-1	1970	717	2765	868	3205	580	14.9328	7.01181	20.6499	6.57211	24.3131	5.45661	0.469556	0.318264	0.224431	Q5DTK1	sp|Q5DTK1|CHSS3_MOUSE Chondroitin sulfate synthase 3 OS=Mus musculus GN=Chsy3 PE=2 SV=3	3e-23
KH.C4.583.v1.A.SL2-1	158	37	113	29	243	44	4.45404	1.34565	3.1385	0.816589	6.85549	1.53946	0.30212	0.260185	0.224559	Q9Z210	sp|Q9Z210|PX11B_MOUSE Peroxisomal membrane protein 11B OS=Mus musculus GN=Pex11b PE=1 SV=1	3e-17
KH.S779.3.v1.C.SL4-1	138	42	149	37	149	27	5.01863	1.97056	5.33874	1.34405	5.42285	1.21868	0.392649	0.251755	0.22473	Q5LMB5	sp|Q5LMB5|DCUP_RUEPO Uroporphyrinogen decarboxylase OS=Ruegeria pomeroyi (strain ATCC 700808 / DSM 15171 / DSS-3) GN=hemE PE=3 SV=1	2.8
KH.C12.560.v1.A.ND1-1	102	10	149	24	110	20	2.4155	0.305521	3.47648	0.567711	2.60697	0.587836	0.126484	0.1633	0.225487	Q9CWG1	sp|Q9CWG1|GLIP1_MOUSE Glioma pathogenesis-related protein 1 OS=Mus musculus GN=Glipr1 PE=2 SV=1	8e-11
KH.C12.157.v1.A.SL1-1	1293	364	1753	295	1418	258	14.4515	5.24869	19.3038	3.29341	15.8609	3.57893	0.363193	0.170609	0.225646	B3M9V8	sp|B3M9V8|KLHDB_DROAN Kelch-like protein diablo OS=Drosophila ananassae GN=dbo PE=3 SV=2	6e-175
KH.C5.177.v1.A.SL3-1	862	291	1114	237	1434	261	10.0914	4.39513	12.8492	2.77141	16.8007	3.79231	0.435532	0.215688	0.225722	P70187	sp|P70187|HIAT1_MOUSE Hippocampus abundant transcript 1 protein OS=Mus musculus GN=Hiat1 PE=2 SV=3	1e-97
KH.C4.572.v1.A.ND1-1	1295	243	1641	357	1054	192	24.4631	5.9222	30.542	6.73627	19.9259	4.50155	0.242087	0.220558	0.225914	Q8BNU0	sp|Q8BNU0|ARMC6_MOUSE Armadillo repeat-containing protein 6 OS=Mus musculus GN=Armc6 PE=2 SV=1	8e-36
KH.C3.804.v1.C.ND1-1	632	59	929	172	449	82	14.4707	1.74284	20.9573	3.93378	10.2885	2.33026	0.12044	0.187705	0.226491	0	0	0
KH.C2.686.v2.A.SL1-1	531	121	604	186	722	132	9.26529	2.72386	10.3836	3.2418	12.6077	2.85862	0.293985	0.312204	0.226736	Q969W1	sp|Q969W1|ZDH16_HUMAN Probable palmitoyltransferase ZDHHC16 OS=Homo sapiens GN=ZDHHC16 PE=2 SV=1	3e-50
KH.C1.814.v1.A.ND1-1	1703	263	1964	358	1503	275	28.1812	5.61481	32.0209	5.91749	24.8909	5.64803	0.19924	0.184801	0.226912	Q681K7	sp|Q681K7|GEX1_ARATH Protein GAMETE EXPRESSED 1 OS=Arabidopsis thaliana GN=GEX1 PE=1 SV=1	6.3
KH.C8.756.v1.A.SL1-1	4465	1710	4567	1036	5388	986	164.494	81.2756	165.77	38.124	198.652	45.0843	0.494093	0.229981	0.226951	Q3T0J3	sp|Q3T0J3|RM16_BOVIN 39S ribosomal protein L16, mitochondrial OS=Bos taurus GN=MRPL16 PE=1 SV=1	4e-14
KH.L147.5.v1.A.SL5-1	574	152	572	129	627	115	9.97639	3.40831	9.79499	2.23955	10.906	2.48072	0.341638	0.228642	0.227465	Q6PHN7	sp|Q6PHN7|TM164_MOUSE Transmembrane protein 164 OS=Mus musculus GN=Tmem164 PE=2 SV=1	3e-29
KH.C4.140.v1.A.SL1-1	174	9	135	52	136	25	4.46026	0.297638	3.40951	1.33145	3.48888	0.795372	0.066731	0.39051	0.227974	Q9Y7Z2	sp|Q9Y7Z2|ARF6_SCHPO ADP-ribosylation factor 6 OS=Schizosaccharomyces pombe (strain 972 / ATCC 24843) GN=arf6 PE=3 SV=1	1e-29
KH.L90.3.v1.A.SL1-1	1957	531	2006	408	2344	431	41.3666	14.4807	41.777	8.61447	49.5852	11.3072	0.350056	0.206201	0.228036	Q9EPB5	sp|Q9EPB5|SERHL_MOUSE Serine hydrolase-like protein OS=Mus musculus GN=Serhl PE=2 SV=1	3e-12
KH.C6.290.v1.A.SL2-1	1084	131	1332	176	515	95	11.5154	1.79537	13.9412	1.86754	5.4751	1.25254	0.155911	0.133959	0.22877	Q9JHI8	sp|Q9JHI8|NOX4_MOUSE NADPH oxidase 4 OS=Mus musculus GN=Nox4 PE=1 SV=1	2e-29
KH.L18.127.v1.A.ND1-1	436	166	539	141	536	99	8.21627	4.03581	10.0074	2.65409	10.1085	2.31549	0.491197	0.265212	0.229062	Q0C0H6	sp|Q0C0H6|TIG_HYPNA Trigger factor OS=Hyphomonas neptunium (strain ATCC 15444) GN=tig PE=3 SV=1	4.1
KH.C10.583.v2.A.ND2-1	140	30	171	58	184	34	4.75231	1.31381	5.71899	1.96659	6.25072	1.43243	0.276457	0.34387	0.229163	O89016	sp|O89016|ABCD4_MOUSE ATP-binding cassette sub-family D member 4 OS=Mus musculus GN=Abcd4 PE=2 SV=2	2e-07
KH.L69.7.v1.C.ND1-1	1323	448	1566	448	1704	315	104.674	45.729	122.072	35.4052	134.923	30.9321	0.43687	0.290034	0.229258	Q7QB13	sp|Q7QB13|CCNC_ANOGA Cyclin-C OS=Anopheles gambiae GN=CycC PE=3 SV=2	2e-31
KH.L96.15.v2.A.SL1-1	1706	194	1768	349	1075	199	29.9356	4.39182	30.5659	6.11706	18.8778	4.33391	0.146709	0.200127	0.229577	Q805E5	sp|Q805E5|CHSTE_DANRE Carbohydrate sulfotransferase 14 OS=Danio rerio GN=chst14 PE=2 SV=1	1e-29
KH.C11.369.v1.A.SL2-1	937	227	1139	173	1177	218	28.1495	8.79816	33.7133	5.19143	35.387	8.12844	0.312551	0.153987	0.229701	Q91917	sp|Q91917|RA51B_XENLA DNA repair protein RAD51 homolog B OS=Xenopus laevis GN=rad51-b PE=2 SV=1	1e-87
KH.C8.617.v2.A.nonSL4-1	334	110	374	64	543	101	7.67575	3.26138	8.46822	1.46914	12.4885	2.88081	0.424894	0.173489	0.230677	F1MK05	sp|F1MK05|RN170_BOVIN E3 ubiquitin-protein ligase RNF170 OS=Bos taurus GN=RNF170 PE=3 SV=2	6e-28
KH.C1.28.v1.A.nonSL1-1	373	102	765	82	344	64	12.1827	4.29803	24.6174	2.67521	11.2442	2.59438	0.352798	0.108671	0.23073	Q1ACG7	sp|Q1ACG7|RPOA_CHAVU DNA-directed RNA polymerase subunit alpha OS=Chara vulgaris GN=rpoA PE=3 SV=1	6
KH.C9.491.v1.A.nonSL3-1	859	191	624	263	634	118	28.5663	8.19461	20.4452	8.73625	21.1001	4.87036	0.286863	0.427301	0.230821	Q28BZ2	sp|Q28BZ2|HINT3_XENTR Histidine triad nucleotide-binding protein 3 OS=Xenopus tropicalis GN=hint3 PE=2 SV=1	4e-19
KH.C2.970.v1.A.SL1-1	489	132	416	58	434	81	10.9545	3.81497	9.18168	1.29784	9.72989	2.25209	0.348257	0.14135	0.231461	C7T2J9	sp|C7T2J9|PORED_MESAU Polyprenol reductase OS=Mesocricetus auratus GN=Srd5a3 PE=2 SV=1	1e-18
KH.C1.1103.v1.A.SL1-1	3915	1097	4203	776	4316	806	89.5745	32.3813	94.7455	17.7347	98.8256	22.8879	0.361501	0.187182	0.231599	Q9NYZ1	sp|Q9NYZ1|TV23B_HUMAN Golgi apparatus membrane protein TVP23 homolog B OS=Homo sapiens GN=TVP23B PE=1 SV=2	1e-34
KH.C3.42.v1.C.ND1-1	551	61	710	66	423	79	19.3589	2.76499	24.5773	2.31623	14.8732	3.44488	0.142828	0.0942428	0.231617	P92670	sp|P92670|NU6M_MACRO NADH-ubiquinone oxidoreductase chain 6 OS=Macropus robustus GN=MT-ND6 PE=3 SV=1	0.23
KH.C3.451.v1.C.SL1-1	2548	530	3374	603	2189	409	54.4888	14.6224	71.0885	12.8805	46.8478	10.8555	0.268356	0.18119	0.231719	Q9CZA6	sp|Q9CZA6|NDE1_MOUSE Nuclear distribution protein nudE homolog 1 OS=Mus musculus GN=Nde1 PE=1 SV=1	9e-19
KH.C12.320.v1.C.SL4-1	315	46	368	37	149	28	12.493	2.35368	14.3797	1.46577	5.91395	1.37827	0.1884	0.101933	0.233053	Q6CGE6	sp|Q6CGE6|CANB_YARLI Calcineurin subunit B OS=Yarrowia lipolytica (strain CLIB 122 / E 150) GN=CNB1 PE=3 SV=1	0.38
KH.C9.259.v1.B.SL2-1	581	103	571	106	585	110	8.52947	1.95082	8.25902	1.55439	8.59483	2.00428	0.228715	0.188205	0.233195	Q14249	sp|Q14249|NUCG_HUMAN Endonuclease G, mitochondrial OS=Homo sapiens GN=ENDOG PE=1 SV=4	4e-34
KH.S2146.1.v1.A.ND1-1	208	43	275	34	239	45	13.5021	3.60114	17.588	2.20457	15.5264	3.6255	0.26671	0.125345	0.233506	O88801	sp|O88801|HOME2_RAT Homer protein homolog 2 OS=Rattus norvegicus GN=Homer2 PE=1 SV=1	8e-15
KH.C11.542.v1.A.SL2-1	956	231	1041	316	1768	333	23.4799	7.31956	25.1904	7.75237	43.4566	10.1508	0.311737	0.307751	0.233585	P41731	sp|P41731|CD63_MOUSE CD63 antigen OS=Mus musculus GN=Cd63 PE=1 SV=2	2e-05
KH.L116.95.v1.A.SL1-1	5566	1035	5410	726	4908	925	130.42	31.2879	124.895	16.9921	115.091	26.9006	0.239901	0.136051	0.233733	B7ZTR0	sp|B7ZTR0|RSG1_XENTR REM2- and Rab-like small GTPase 1 OS=Xenopus tropicalis GN=rsg1 PE=2 SV=1	5e-26
KH.C12.690.v1.A.ND1-1	1111	148	1691	276	1219	230	17.9735	3.08898	26.9531	4.46002	19.7359	4.61812	0.171863	0.165473	0.233995	A8QCE4	sp|A8QCE4|LST2_BRUMA Lateral signaling target protein 2 homolog OS=Brugia malayi GN=Bm1_49520 PE=3 SV=1	7e-08
KH.C4.335.v2.A.SL2-2	166	39	299	85	258	49	2.3764	0.720296	4.21726	1.21546	3.6963	0.870617	0.303103	0.288211	0.235537	O75096	sp|O75096|LRP4_HUMAN Low-density lipoprotein receptor-related protein 4 OS=Homo sapiens GN=LRP4 PE=1 SV=4	3e-40
KH.C11.486.v1.A.SL1-1	1012	365	1325	352	2074	394	24.5069	11.4034	31.6133	8.51449	50.2633	11.8419	0.465315	0.269333	0.235598	Q9NP94	sp|Q9NP94|S39A2_HUMAN Zinc transporter ZIP2 OS=Homo sapiens GN=SLC39A2 PE=1 SV=2	6e-05
KH.C7.286.v1.A.SL1-1	746	136	1135	225	879	167	8.49044	1.99694	12.7272	2.5579	10.0119	2.35899	0.235198	0.200978	0.235619	O94972	sp|O94972|TRI37_HUMAN E3 ubiquitin-protein ligase TRIM37 OS=Homo sapiens GN=TRIM37 PE=1 SV=2	6e-116
KH.C1.932.v1.A.SL1-1	944	234	998	241	1442	274	52.2285	16.7027	54.4017	13.3187	79.8429	18.815	0.3198	0.244821	0.235651	Q8TE73	sp|Q8TE73|DYH5_HUMAN Dynein heavy chain 5, axonemal OS=Homo sapiens GN=DNAH5 PE=1 SV=3	3.6
KH.C9.573.v1.A.SL1-1	1578	331	1844	284	1910	363	35.5035	9.60785	40.8763	6.38251	43.0064	10.1365	0.270617	0.156142	0.235698	Q9H920	sp|Q9H920|RN121_HUMAN RING finger protein 121 OS=Homo sapiens GN=RNF121 PE=1 SV=1	2e-87
KH.C2.363.v3.A.SL1-2	1843	402	2275	719	2270	432	16.8101	4.73048	20.4443	6.55063	20.7208	4.89044	0.281407	0.320413	0.236016	Q49A17	sp|Q49A17|GLTL6_HUMAN Polypeptide N-acetylgalactosaminyltransferase-like 6 OS=Homo sapiens GN=GALNTL6 PE=2 SV=2	1e-105
KH.C9.771.v1.A.SL1-1	1815	471	2917	738	3002	572	32.029	10.7231	50.7165	13.0086	53.0167	12.528	0.334795	0.256497	0.236303	Q6IRL9	sp|Q6IRL9|HDAC3_XENLA Histone deacetylase 3 OS=Xenopus laevis GN=hdac3 PE=2 SV=2	2e-149
KH.C2.841.v1.A.SL2-1	511	189	670	165	740	141	11.011	5.25414	14.2242	3.55139	15.9578	3.77089	0.477172	0.249673	0.236304	Q562D6	sp|Q562D6|NAP1_MOUSE Nef-associated protein 1 OS=Mus musculus GN=Nap1 PE=2 SV=2	2e-44
KH.C10.155.v1.A.nonSL2-1	300	68	494	203	491	94	8.04147	2.35157	13.0463	5.43524	13.1714	3.12724	0.29243	0.416612	0.237427	P86411	sp|P86411|RGPA2_RAT Ral GTPase-activating protein subunit alpha-2 OS=Rattus norvegicus GN=Ralgapa2 PE=1 SV=1	1.1
KH.C2.1077.v1.A.nonSL2-1	1583	418	1925	326	981	188	22.0624	7.51594	26.4332	4.53836	13.6829	3.25199	0.340667	0.171692	0.237669	Q80VY9	sp|Q80VY9|DHX33_MOUSE Putative ATP-dependent RNA helicase DHX33 OS=Mus musculus GN=Dhx33 PE=1 SV=1	2e-124
KH.C4.622.v1.A.ND1-1	2731	460	3004	290	2436	467	29.2313	6.35211	31.6791	3.10051	26.0939	6.20385	0.217305	0.0978725	0.237751	Q12980	sp|Q12980|NPRL3_HUMAN Nitrogen permease regulator 3-like protein OS=Homo sapiens GN=NPRL3 PE=1 SV=1	3e-16
KH.C4.402.v1.A.SL1-1	421	74	689	176	761	146	6.43581	1.45944	10.3774	2.68746	11.6424	2.77008	0.226769	0.258974	0.237931	Q9JHG3	sp|Q9JHG3|APJ_RAT Apelin receptor OS=Rattus norvegicus GN=Aplnr PE=1 SV=1	0.12
KH.S2462.1.v1.B.SL2-1	436	138	422	103	317	61	38.1883	15.594	36.4169	9.01135	27.7868	6.6312	0.408345	0.24745	0.238646	P19623	sp|P19623|SPEE_HUMAN Spermidine synthase OS=Homo sapiens GN=SRM PE=1 SV=1	9e-31
KH.C8.56.v2.A.SL2-1	207	46	323	24	270	52	5.68586	1.63011	8.74127	0.658485	7.42207	1.77275	0.286696	0.0753306	0.238849	Q86X76	sp|Q86X76|NIT1_HUMAN Nitrilase homolog 1 OS=Homo sapiens GN=NIT1 PE=1 SV=2	4e-47
KH.C7.582.v1.A.SL1-1	1964	714	2239	630	2357	454	49.4078	23.1732	55.495	15.8308	59.3402	14.1752	0.46902	0.285265	0.23888	P19623	sp|P19623|SPEE_HUMAN Spermidine synthase OS=Homo sapiens GN=SRM PE=1 SV=1	6e-73
KH.C6.283.v1.A.nonSL35-1	120	42	138	52	114	22	3.27877	1.48052	3.71497	1.41919	3.11724	0.746056	0.451546	0.382021	0.239332	F6X2V8	sp|F6X2V8|MTAP_CIOIN S-methyl-5'-thioadenosine phosphorylase OS=Ciona intestinalis PE=3 SV=1	5e-128
KH.S642.1.v2.A.nonSL6-1	447	90	555	66	409	79	6.53757	1.69819	7.99739	0.964188	5.98643	1.43402	0.259758	0.120563	0.239545	Q8IUH5	sp|Q8IUH5|ZDH17_HUMAN Palmitoyltransferase ZDHHC17 OS=Homo sapiens GN=ZDHHC17 PE=1 SV=2	2e-48
KH.L131.3.v1.A.nonSL2-1	282	103	291	66	528	102	16.67	7.85521	16.9483	3.89708	31.236	7.48351	0.471219	0.229939	0.239579	B0UXH9	sp|B0UXH9|CI116_DANRE UPF0691 protein C9orf116 homolog OS=Danio rerio GN=si:ch211-248e11.2 PE=3 SV=1	4e-08
KH.C4.646.v1.A.SL1-1	3641	565	3662	578	2752	532	68.655	13.7447	68.0325	10.8865	51.932	12.4504	0.200199	0.160019	0.239743	Q7T2D4	sp|Q7T2D4|ERGI2_DANRE Endoplasmic reticulum-Golgi intermediate compartment protein 2 OS=Danio rerio GN=ergic2 PE=2 SV=1	9e-30
KH.C8.403.v1.A.SL1-2	705	229	793	345	1081	209	20.2037	8.46666	22.3904	9.87576	31.003	7.43374	0.419064	0.441071	0.239775	Q9CRT8	sp|Q9CRT8|XPOT_MOUSE Exportin-T OS=Mus musculus GN=Xpot PE=2 SV=3	2e-07
KH.C3.260.v1.C.SL1-1	528	108	601	69	605	117	16.5666	4.37176	18.5789	2.1625	18.9972	4.5562	0.263891	0.116396	0.239836	Q9WU84	sp|Q9WU84|CCS_MOUSE Copper chaperone for superoxide dismutase OS=Mus musculus GN=Ccs PE=2 SV=1	2e-43
KH.L37.63.v1.C.nonSL2-2	2056	634	2486	817	2801	542	60.31	23.9933	71.8478	23.9385	82.2271	19.7326	0.397833	0.333183	0.239977	Q962X9	sp|Q962X9|BUD31_BRABE Protein BUD31 homolog OS=Branchiostoma belcheri PE=2 SV=1	2e-60
KH.S852.2.v2.A.SL1-1	3700	978	4533	1443	5524	1069	53.9871	18.4103	65.166	21.0312	80.6636	19.3591	0.341013	0.322733	0.239998	Q3UE17	sp|Q3UE17|MEX3D_MOUSE RNA-binding protein MEX3D OS=Mus musculus GN=Mex3d PE=2 SV=2	9e-45
KH.C1.457.v6.A.SL4-1	444	139	562	178	721	140	4.68781	1.89337	5.84614	1.87722	7.61829	1.83457	0.403893	0.321104	0.240811	Q96PQ7	sp|Q96PQ7|KLHL5_HUMAN Kelch-like protein 5 OS=Homo sapiens GN=KLHL5 PE=2 SV=3	5e-131
KH.C2.49.v1.A.ND2-1	468	124	439	61	345	67	19.9068	6.80473	18.3978	2.59175	14.6862	3.53711	0.34183	0.140873	0.240846	Q5SRE7	sp|Q5SRE7|PHYD1_HUMAN Phytanoyl-CoA dioxygenase domain-containing protein 1 OS=Homo sapiens GN=PHYHD1 PE=1 SV=2	7.3
KH.C3.71.v1.A.SL1-1	3608	1260	3623	795	2209	429	82.3081	37.0835	81.4312	18.1156	50.4321	12.1465	0.450545	0.222465	0.240849	Q92262	sp|Q92262|PEX3_PICPA Peroxisomal biogenesis factor 3 OS=Komagataella pastoris GN=PEX3 PE=3 SV=1	0.041
KH.L112.7.v1.A.nonSL2-1	483	165	580	163	668	130	8.78774	3.87301	10.3969	2.96228	12.163	2.93557	0.440729	0.284919	0.241352	Q5U4T9	sp|Q5U4T9|MBOA7_XENLA Lysophospholipid acyltransferase 7 OS=Xenopus laevis GN=mboat7 PE=2 SV=1	4e-44
KH.L152.17.v1.A.SL2-1	976	147	976	174	1312	256	22.7322	4.41715	22.3969	4.04808	30.5816	7.4003	0.194313	0.180743	0.241986	P59382	sp|P59382|PXMP4_RAT Peroxisomal membrane protein 4 OS=Rattus norvegicus GN=Pxmp4 PE=1 SV=2	4e-31
KH.S781.10.v1.C.SL1-1	139	23	175	46	333	65	12.3486	2.63613	15.3175	4.08198	29.6063	7.16698	0.213475	0.266491	0.242076	Q762D5	sp|Q762D5|S35D2_MOUSE UDP-N-acetylglucosamine/UDP-glucose/GDP-mannose transporter OS=Mus musculus GN=Slc35d2 PE=2 SV=1	1.2
KH.C4.391.v1.A.SL1-1	2859	897	4042	1202	4965	970	24.2424	9.81269	33.7679	10.1806	42.1324	10.2083	0.404774	0.301488	0.24229	Q96NE9	sp|Q96NE9|FRMD6_HUMAN FERM domain-containing protein 6 OS=Homo sapiens GN=FRMD6 PE=1 SV=1	8e-17
KH.C5.282.v1.A.SL1-1	4604	709	5028	773	2788	545	63.8231	12.6801	68.6728	10.7036	38.6786	9.37687	0.198676	0.155864	0.24243	Q7ZYD9	sp|Q7ZYD9|A13CB_XENLA Ankyrin repeat domain-containing protein 13C-B OS=Xenopus laevis GN=ankrd13c-b PE=2 SV=1	2e-48
KH.C1.1245.v1.A.SL1-1	567	203	435	92	709	139	16.5697	7.65351	12.5247	2.68551	20.7354	5.04155	0.461899	0.214418	0.243137	Q60V90	sp|Q60V90|NDST_CAEBR Bifunctional heparan sulfate N-deacetylase/N-sulfotransferase 1 OS=Caenorhabditis briggsae GN=hst-1 PE=3 SV=3	0.18
KH.C12.657.v1.B.SL2-1	1028	257	1668	612	1135	223	15.6611	5.05122	25.0364	9.313	17.3046	4.21651	0.322533	0.371978	0.243665	Q3MIB4	sp|Q3MIB4|LONP2_RAT Lon protease homolog 2, peroxisomal OS=Rattus norvegicus GN=Lonp2 PE=1 SV=2	3e-73
KH.C1.1024.v1.A.SL1-1	2592	970	3225	1355	1998	393	51.8628	25.0396	63.5766	27.0813	40.0085	9.75961	0.482804	0.425963	0.243939	Q9BQ67	sp|Q9BQ67|GRWD1_HUMAN Glutamate-rich WD repeat-containing protein 1 OS=Homo sapiens GN=GRWD1 PE=1 SV=1	4e-96
KH.C1.717.v2.A.SL2-1	952	103	1284	151	1230	242	9.73723	1.35916	12.9393	1.54271	12.5904	3.07208	0.139584	0.119227	0.244002	Q8BR76	sp|Q8BR76|MKS3_MOUSE Meckelin OS=Mus musculus GN=Tmem67 PE=1 SV=2	8e-69
KH.C1.250.v4.A.ND1-1	263	44	412	56	254	50	4.20877	0.908419	6.49595	0.895151	4.06788	0.993089	0.21584	0.137801	0.244129	0	0	0
KH.C5.46.v2.A.nonSL4-1	546	192	629	115	589	116	14.1123	6.40239	16.0178	2.96902	15.2355	3.7212	0.453673	0.185357	0.244245	Q8NEB5	sp|Q8NEB5|PPC1B_HUMAN Phosphatidate phosphatase PPAPDC1B OS=Homo sapiens GN=PPAPDC1B PE=1 SV=2	9e-37
KH.S364.1.v2.A.nonSL4-1	302	79	346	82	253	50	6.62688	2.23647	7.4804	1.79732	5.55595	1.36173	0.337485	0.24027	0.245094	O70348	sp|O70348|DOM3Z_MOUSE Decapping and exoribonuclease protein OS=Mus musculus GN=Dom3z PE=1 SV=2	5e-28
KH.C4.449.v1.A.ND1-1	922	168	1204	303	1462	290	4.75508	1.11782	6.11786	1.56091	7.54588	1.85628	0.235078	0.25514	0.245999	P82987	sp|P82987|ATL3_HUMAN ADAMTS-like protein 3 OS=Homo sapiens GN=ADAMTSL3 PE=2 SV=4	3e-26
KH.C14.460.v1.A.SL1-1	563	200	519	81	761	151	22.4721	10.2991	20.4103	3.22945	30.3987	7.4805	0.458306	0.158227	0.24608	Q3T0W7	sp|Q3T0W7|ATG12_BOVIN Ubiquitin-like protein ATG12 OS=Bos taurus GN=ATG12 PE=2 SV=1	4e-21
KH.C11.723.v1.A.SL2-1	2807	759	3508	1081	2106	418	45.7442	15.9577	56.3248	17.5966	34.3469	8.45452	0.348846	0.312413	0.246151	Q91618	sp|Q91618|PMYT1_XENLA Membrane-associated tyrosine- and threonine-specific cdc2-inhibitory kinase OS=Xenopus laevis GN=pkmyt1 PE=1 SV=1	3e-44
KH.C13.5.v1.B.SL1-1	330	28	544	41	352	70	9.84733	1.07795	15.9937	1.22207	10.5119	2.59251	0.109466	0.0764095	0.246626	Q62507	sp|Q62507|COCH_MOUSE Cochlin OS=Mus musculus GN=Coch PE=2 SV=2	0.53
KH.L8.21.v1.A.SL2-1	254	77	384	70	455	91	3.60137	1.40851	5.36428	0.991381	6.45625	1.60138	0.391103	0.184812	0.248035	Q5RAM2	sp|Q5RAM2|ERR3_PONAB Estrogen-related receptor gamma OS=Pongo abelii GN=ESRRG PE=2 SV=1	6e-72
KH.S1039.3.v1.C.SL3-1	132	37	230	25	150	30	3.89778	1.40955	6.69142	0.737382	4.43272	1.09947	0.361628	0.110198	0.248035	Q55EX9	sp|Q55EX9|Y8948_DICDI Putative methyltransferase DDB_G0268948 OS=Dictyostelium discoideum GN=DDB_G0268948 PE=1 SV=2	2e-09
KH.C3.334.v1.C.SL1-1	1000	286	1184	310	863	173	35.2137	12.9931	41.078	10.9039	30.4129	7.56095	0.368978	0.265444	0.24861	Q9Y4C5	sp|Q9Y4C5|CHST2_HUMAN Carbohydrate sulfotransferase 2 OS=Homo sapiens GN=CHST2 PE=1 SV=2	8e-07
KH.C7.2.v4.A.SL3-1	670	250	770	166	1125	226	19.3433	9.31174	21.9025	4.78711	32.5046	8.09811	0.481393	0.218565	0.249138	Q08BD8	sp|Q08BD8|MTRF2_DANRE Mitochondrial fission regulator 2 OS=Danio rerio GN=mtfr2 PE=2 SV=1	0.0002
KH.C14.63.v1.A.SL3-1	294	95	364	58	189	38	5.79312	2.41503	7.06664	1.14157	3.72703	0.929325	0.41688	0.161543	0.249348	Q0VB26	sp|Q0VB26|TEX26_MOUSE Testis-expressed sequence 26 protein OS=Mus musculus GN=Tex26 PE=2 SV=1	0.092
KH.L152.40.v1.A.SL1-1	781	200	1065	222	1034	208	12.5112	4.13343	16.809	3.55229	16.5769	4.13551	0.33038	0.211332	0.249474	Q91892	sp|Q91892|CLCC1_XENLA Chloride channel CLIC-like protein 1 OS=Xenopus laevis GN=clcc1 PE=2 SV=1	0.003
KH.C4.102.v2.A.nonSL3-2	143	10	274	23	139	28	0.832191	0.0750795	1.57103	0.133698	0.809538	0.202238	0.0902191	0.085102	0.24982	Q9UKP4	sp|Q9UKP4|ATS7_HUMAN A disintegrin and metalloproteinase with thrombospondin motifs 7 OS=Homo sapiens GN=ADAMTS7 PE=1 SV=2	1e-122
KH.L172.6.v1.A.SL3-1	1622	557	1850	402	1587	320	11.9455	5.29229	13.4237	2.95726	11.6968	2.92498	0.443036	0.220301	0.250067	Q5E9V6	sp|Q5E9V6|COMD4_BOVIN COMM domain-containing protein 4 OS=Bos taurus GN=COMMD4 PE=2 SV=2	2e-24
KH.C7.724.v1.A.SL1-1	3273	563	3365	547	2499	504	70.8702	15.7275	71.7876	11.8308	54.1526	13.5446	0.22192	0.164803	0.25012	Q99LW6	sp|Q99LW6|YAF2_MOUSE YY1-associated factor 2 OS=Mus musculus GN=Yaf2 PE=1 SV=1	2e-12
KH.C5.116.v1.A.ND1-1	545	89	632	108	347	70	9.21983	1.94245	10.5339	1.82498	5.87478	1.46975	0.210682	0.173248	0.25018	Q9Z0Z3	sp|Q9Z0Z3|SKP2_MOUSE S-phase kinase-associated protein 2 OS=Mus musculus GN=Skp2 PE=1 SV=1	5e-05
KH.S346.3.v1.A.SL1-1	2775	881	3935	795	3384	685	51.026	20.8996	71.2885	14.6017	62.2722	15.6328	0.409588	0.204826	0.25104	Q5RJY2	sp|Q5RJY2|G2E3_MOUSE G2/M phase-specific E3 ubiquitin-protein ligase OS=Mus musculus GN=G2e3 PE=2 SV=2	4e-31
KH.C8.602.v1.A.ND1-1	882	84	1177	85	563	114	17.7506	2.18101	23.3382	1.70872	11.3393	2.84752	0.12287	0.0732158	0.251119	Q5JXC2	sp|Q5JXC2|MIIP_HUMAN Migration and invasion-inhibitory protein OS=Homo sapiens GN=MIIP PE=1 SV=3	9e-07
KH.C2.933.v2.A.SL4-1	422	83	387	43	380	77	14.4829	3.67499	13.0858	1.47408	13.0516	3.27985	0.253746	0.112647	0.251299	E7EYQ9	sp|E7EYQ9|TM216_DANRE Transmembrane protein 216 OS=Danio rerio GN=tmem216 PE=3 SV=1	4e-10
KH.C3.6.v1.A.ND1-1	1763	260	1502	327	1332	270	62.0817	11.8119	52.1108	11.5019	46.9409	11.8003	0.190263	0.220719	0.251387	Q9W0Y2	sp|Q9W0Y2|YS11_DROME Putative gamma-glutamylcyclotransferase CG2811 OS=Drosophila melanogaster GN=CG2811 PE=2 SV=2	1e-11
KH.C3.37.v1.B.ND1-1	192	26	180	24	245	50	2.39662	0.418703	2.21369	0.299239	3.06055	0.774617	0.174705	0.135177	0.253097	0	0	0
KH.C3.145.v1.A.SL2-1	1069	172	1593	304	841	172	23.6746	4.91437	34.759	6.72493	18.6396	4.72773	0.20758	0.193473	0.253639	Q5RBN9	sp|Q5RBN9|TAD2B_PONAB Transcriptional adapter 2-beta OS=Pongo abelii GN=TADA2B PE=2 SV=1	4e-53
KH.S698.3.v2.A.SL2-1	1522	501	2032	674	2327	476	40.1396	17.0463	52.7993	17.7553	61.4172	15.5806	0.424676	0.336278	0.253684	Q2KJ96	sp|Q2KJ96|ARL5A_BOVIN ADP-ribosylation factor-like protein 5A OS=Bos taurus GN=ARL5A PE=2 SV=1	6e-43
KH.L131.10.v1.A.nonSL2-1	696	184	931	191	956	196	11.7615	4.0115	15.5007	3.22401	16.1677	4.11083	0.34107	0.207992	0.254262	Q1LUQ4	sp|Q1LUQ4|MFD6A_DANRE Major facilitator superfamily domain-containing protein 6-A OS=Danio rerio GN=mfsd6a PE=3 SV=1	0.026
KH.L5.20.v1.A.nonSL3-1	375	96	428	186	429	88	7.73731	2.55543	8.7006	3.83337	8.85832	2.25351	0.330274	0.440587	0.254395	Q5H879	sp|Q5H879|COMT_HORSE Catechol O-methyltransferase OS=Equus caballus GN=COMT PE=2 SV=1	0.0001
KH.C7.444.v1.A.SL1-1	158	39	230	43	263	54	6.25835	1.99297	8.97587	1.7013	10.4254	2.6547	0.31845	0.189541	0.254637	Q9NUP1	sp|Q9NUP1|BL1S4_HUMAN Biogenesis of lysosome-related organelles complex 1 subunit 4 OS=Homo sapiens GN=BLOC1S4 PE=1 SV=1	0.0004
KH.L50.16.v1.R.ND1-1	764	284	757	139	711	146	17.3652	8.32796	16.9523	3.1558	16.173	4.11868	0.479578	0.186158	0.254663	Q9NQT5	sp|Q9NQT5|EXOS3_HUMAN Exosome complex component RRP40 OS=Homo sapiens GN=EXOSC3 PE=1 SV=3	2e-30
KH.C2.585.v1.A.SL1-1	2611	748	2836	327	1985	408	58.2811	21.5406	62.3697	7.29084	44.3422	11.3032	0.369598	0.116897	0.254908	Q96E29	sp|Q96E29|MTER1_HUMAN mTERF domain-containing protein 1, mitochondrial OS=Homo sapiens GN=MTERFD1 PE=1 SV=2	2e-05
KH.C1.458.v1.A.ND1-1	298	66	400	79	214	44	4.90779	1.40232	6.49048	1.29959	3.52711	0.899377	0.285734	0.20023	0.254989	A1L258	sp|A1L258|D2HDH_DANRE D-2-hydroxyglutarate dehydrogenase, mitochondrial OS=Danio rerio GN=d2hgdh PE=2 SV=1	1e-111
KH.C2.842.v1.A.SL1-1	2872	744	4397	1395	3910	806	22.0496	7.36927	33.2598	10.6979	30.042	7.68017	0.334213	0.321648	0.255648	Q68CP9	sp|Q68CP9|ARID2_HUMAN AT-rich interactive domain-containing protein 2 OS=Homo sapiens GN=ARID2 PE=1 SV=2	8e-24
KH.C4.377.v1.A.SL1-1	3056	400	2571	558	1375	285	53.7152	9.07065	44.5239	9.79687	24.187	6.21739	0.168866	0.220036	0.257055	Q3KPL3	sp|Q3KPL3|LYSM2_XENLA LysM and putative peptidoglycan-binding domain-containing protein 2 OS=Xenopus laevis GN=lysmd2 PE=2 SV=2	6e-11
KH.L7.29.v1.A.nonSL2-1	237	57	414	100	260	54	4.05347	1.25773	6.9763	1.70839	4.45028	1.14628	0.310285	0.244885	0.257575	Q3UIR3	sp|Q3UIR3|DTX3L_MOUSE E3 ubiquitin-protein ligase DTX3L OS=Mus musculus GN=Dtx3l PE=2 SV=1	2e-32
KH.C3.323.v1.A.SL2-1	1803	645	2253	791	3245	674	48.9624	22.5975	60.2801	21.4562	88.1895	22.7167	0.461528	0.355941	0.25759	Q502L2	sp|Q502L2|PGAM5_DANRE Serine/threonine-protein phosphatase PGAM5, mitochondrial OS=Danio rerio GN=pgam5 PE=2 SV=2	1e-42
KH.C3.439.v1.A.SL2-1	2507	728	2588	514	2695	560	42.1817	15.8029	42.9023	8.63858	45.38	11.6944	0.374638	0.201354	0.257699	Q9TU53	sp|Q9TU53|CUBN_CANFA Cubilin OS=Canis familiaris GN=CUBN PE=1 SV=1	3e-10
KH.L57.22.v1.A.nonSL2-1	455	100	518	144	303	63	5.7139	1.62015	6.40911	1.80631	3.80802	0.981931	0.283546	0.281835	0.257858	Q8C1A3	sp|Q8C1A3|MTRR_MOUSE Methionine synthase reductase OS=Mus musculus GN=Mtrr PE=2 SV=2	6e-40
KH.C9.575.v1.A.ND1-1	468	57	205	24	115	24	5.50789	0.865463	2.37706	0.282137	1.35448	0.350566	0.157132	0.118692	0.258819	0	0	0
KH.C9.264.v1.A.SL1-1	952	309	1392	387	1326	277	16.2287	6.79579	23.3794	6.58972	22.6218	5.86065	0.418751	0.28186	0.259071	Q3TV65	sp|Q3TV65|MPND_MOUSE MPN domain-containing protein OS=Mus musculus GN=Mpnd PE=2 SV=2	4e-39
KH.S545.2.v1.A.SL1-1	736	228	747	307	1117	234	10.4165	4.16305	10.4162	4.34	15.8209	4.11033	0.399661	0.416658	0.259804	Q9H147	sp|Q9H147|TDIF1_HUMAN Deoxynucleotidyltransferase terminal-interacting protein 1 OS=Homo sapiens GN=DNTTIP1 PE=1 SV=2	5e-16
KH.S396.7.v1.B.SL1-1	2002	522	2433	808	2213	464	26.3658	8.86913	31.5693	10.6291	29.1671	7.58425	0.336388	0.336691	0.260028	Q9NP60	sp|Q9NP60|IRPL2_HUMAN X-linked interleukin-1 receptor accessory protein-like 2 OS=Homo sapiens GN=IL1RAPL2 PE=2 SV=1	0.015
KH.C8.216.v2.A.nonSL7-1	702	97	955	209	372	78	7.02083	1.25158	9.41025	2.08788	3.72331	0.968199	0.178266	0.221873	0.260037	Q5EAB6	sp|Q5EAB6|PMGT1_BOVIN Protein O-linked-mannose beta-1,2-N-acetylglucosaminyltransferase 1 OS=Bos taurus GN=POMGNT1 PE=2 SV=1	3e-93
KH.C6.125.v1.R.ND1-1	601	139	932	212	472	99	6.2688	1.87051	9.57795	2.20879	4.92706	1.28163	0.298383	0.230612	0.260122	Q9Y2K7	sp|Q9Y2K7|KDM2A_HUMAN Lysine-specific demethylase 2A OS=Homo sapiens GN=KDM2A PE=1 SV=3	5e-72
KH.S675.5.v1.A.ND1-1	126	34	136	39	157	33	2.44557	0.851379	2.60073	0.756107	3.04961	0.794955	0.348131	0.290729	0.260674	Q6DIM3	sp|Q6DIM3|TBD_XENTR Tubulin delta chain OS=Xenopus tropicalis GN=tubd1 PE=2 SV=1	0.19
KH.L172.3.v1.A.ND1-1	960	298	992	318	837	176	25.4475	10.1912	25.9079	8.41996	22.2042	5.79036	0.400479	0.324996	0.260778	Q7TPN9	sp|Q7TPN9|PRR14_MOUSE Proline-rich protein 14 OS=Mus musculus GN=Prr14 PE=2 SV=1	4e-08
KH.C8.891.v1.A.SL2-1	242	67	331	52	347	73	4.01744	1.43497	5.41388	0.862276	5.765	1.5041	0.357186	0.159271	0.260902	Q8NBI5	sp|Q8NBI5|S43A3_HUMAN Solute carrier family 43 member 3 OS=Homo sapiens GN=SLC43A3 PE=1 SV=2	2e-18
KH.C8.703.v1.A.SL2-1	200	62	193	81	114	24	2.18738	0.874825	2.07969	0.88489	1.24777	0.325781	0.399941	0.425491	0.26109	Q84P26	sp|Q84P26|4CLL8_ARATH 4-coumarate--CoA ligase-like 8 OS=Arabidopsis thaliana GN=4CLL8 PE=2 SV=2	3e-37
KH.C1.875.v1.A.SL1-1	1584	501	1475	338	1019	215	39.9128	16.2865	36.6181	8.50712	25.6961	6.72379	0.408053	0.23232	0.261666	Q15526	sp|Q15526|SURF1_HUMAN Surfeit locus protein 1 OS=Homo sapiens GN=SURF1 PE=1 SV=1	7e-50
KH.C12.1.v1.A.ND1-1	391	131	484	172	639	135	7.25395	3.13548	8.84687	3.18739	11.8641	3.1085	0.432244	0.360284	0.262009	Q8BWN8	sp|Q8BWN8|ACOT4_MOUSE Acyl-coenzyme A thioesterase 4 OS=Mus musculus GN=Acot4 PE=2 SV=1	3e-10
KH.L37.34.v1.A.nonSL6-1	482	180	513	223	741	157	12.2846	5.9186	12.8818	5.67709	18.9002	4.96627	0.481792	0.440707	0.262763	Q9CR95	sp|Q9CR95|NECP1_MOUSE Adaptin ear-binding coat-associated protein 1 OS=Mus musculus GN=Necap1 PE=1 SV=2	1e-32
KH.C2.1032.v1.A.ND1-1	1234	209	1479	437	736	156	34.1063	7.45247	40.2749	12.0645	20.3579	5.35135	0.218507	0.299554	0.262863	Q54RB7	sp|Q54RB7|SHKA_DICDI Dual specificity protein kinase shkA OS=Dictyostelium discoideum GN=shkA PE=2 SV=1	6e-05
KH.C3.92.v1.B.SL1-1	2694	581	2918	892	3649	774	34.5144	9.60313	36.8327	11.415	46.7855	12.3073	0.278236	0.309915	0.263057	P70665	sp|P70665|SIAE_MOUSE Sialate O-acetylesterase OS=Mus musculus GN=Siae PE=2 SV=3	5e-69
KH.C9.896.v1.A.SL2-1	148	52	197	57	202	43	3.55631	1.61204	4.66391	1.36811	4.85763	1.2824	0.45329	0.29334	0.263998	Q83F39	sp|Q83F39|TDH_COXBU L-threonine 3-dehydrogenase OS=Coxiella burnetii (strain RSA 493 / Nine Mile phase I) GN=tdh PE=3 SV=1	1e-18
KH.C13.135.v1.A.SL1-1	8339	2636	11040	2368	6683	1424	98.4023	40.1302	128.353	27.9114	78.9221	20.8555	0.407817	0.217458	0.264254	Q5R7T9	sp|Q5R7T9|MTF2_PONAB Metal-response element-binding transcription factor 2 OS=Pongo abelii GN=MTF2 PE=2 SV=1	3e-56
KH.C8.715.v1.A.nonSL4-1	149	47	151	36	183	39	2.61454	1.064	2.61055	0.630986	3.21362	0.84936	0.406955	0.241706	0.2643	Q66KD9	sp|Q66KD9|VWA9_XENTR von Willebrand factor A domain-containing protein 9 OS=Xenopus tropicalis GN=vwa9 PE=2 SV=1	9e-45
KH.C7.421.v1.C.SL1-1	1712	144	1483	142	1186	253	65.9633	7.15806	56.2971	5.46507	45.7318	12.0987	0.108516	0.0970755	0.264557	Q0P5N6	sp|Q0P5N6|ARL16_HUMAN ADP-ribosylation factor-like protein 16 OS=Homo sapiens GN=ARL16 PE=2 SV=1	4e-08
KH.S948.1.v2.A.ND1-1	356	96	209	54	145	31	7.03709	2.44821	4.07039	1.06622	2.86845	0.760543	0.347901	0.261945	0.265141	Q9LVI6	sp|Q9LVI6|RLK90_ARATH Probable inactive receptor kinase RLK902 OS=Arabidopsis thaliana GN=RLK902 PE=1 SV=1	0.15
KH.C3.773.v1.A.ND1-1	2909	1120	5457	2148	4674	1000	33.8516	16.8147	62.5657	24.9677	54.4327	14.4429	0.496717	0.399064	0.265335	Q9UL17	sp|Q9UL17|TBX21_HUMAN T-box transcription factor TBX21 OS=Homo sapiens GN=TBX21 PE=1 SV=1	2e-19
KH.L108.1.v4.A.SL2-1	473	165	590	228	682	146	7.97576	3.58946	9.80189	3.84021	11.5088	3.0555	0.450046	0.391783	0.265492	P49024	sp|P49024|PAXI_CHICK Paxillin OS=Gallus gallus GN=PXN PE=1 SV=1	6e-78
KH.C1.451.v2.A.SL2-1	205	60	177	51	126	27	3.02382	1.14179	2.5723	0.751416	1.85998	0.494293	0.3776	0.292119	0.265752	P15693	sp|P15693|PPBI1_RAT Intestinal-type alkaline phosphatase 1 OS=Rattus norvegicus GN=Alpi PE=1 SV=1	5e-44
KH.C1.552.v1.A.SL1-1	3132	1065	3623	830	4749	1018	59.709	26.194	68.0507	15.8054	90.6057	24.0871	0.438695	0.232259	0.265845	Q8VDN4	sp|Q8VDN4|CCD92_MOUSE Coiled-coil domain-containing protein 92 OS=Mus musculus GN=Ccdc92 PE=2 SV=1	4e-14
KH.C9.726.v1.A.SL1-1	2115	306	2447	523	2358	506	25.1484	4.69414	28.6669	6.21171	28.0595	7.46741	0.186657	0.216686	0.266128	Q8VCL5	sp|Q8VCL5|S17A9_MOUSE Solute carrier family 17 member 9 OS=Mus musculus GN=Slc17a9 PE=1 SV=3	6e-43
KH.C7.479.v1.A.ND1-1	124	31	172	23	149	32	6.0244	1.94307	8.23317	1.11617	7.24459	1.92957	0.322533	0.135569	0.266347	P0C1N9	sp|P0C1N9|PIGY_BOVIN Phosphatidylinositol N-acetylglucosaminyltransferase subunit Y OS=Bos taurus GN=PIGY PE=3 SV=1	0.003
KH.C12.680.v1.A.SL1-1	1686	442	2127	405	2150	462	47.017	15.9021	58.4401	11.2814	60.0027	15.9904	0.33822	0.193041	0.266494	Q5U395	sp|Q5U395|CNEPA_DANRE CTD nuclear envelope phosphatase 1A OS=Danio rerio GN=ctdnep1a PE=2 SV=1	3e-63
KH.C3.210.v1.C.nonSL3-1	291	91	342	111	228	49	9.69803	3.91261	11.2296	3.69507	7.60433	2.02677	0.403444	0.329048	0.266529	B4F6K2	sp|B4F6K2|GLO2_XENTR Hydroxyacylglutathione hydrolase, mitochondrial OS=Xenopus tropicalis GN=hagh PE=2 SV=1	1e-48
KH.C1.529.v5.A.nonSL9-2	103	19	126	35	144	31	1.27901	0.304387	1.54154	0.434125	1.78952	0.477769	0.237986	0.281618	0.266982	Q9NQX3	sp|Q9NQX3|GEPH_HUMAN Gephyrin OS=Homo sapiens GN=GPHN PE=1 SV=1	1e-45
KH.L4.41.v1.A.nonSL5-1	189	72	187	51	130	28	4.00048	1.96615	3.89976	1.07827	2.75378	0.735575	0.491479	0.276497	0.267115	Q0P4C4	sp|Q0P4C4|DCAKD_DANRE Dephospho-CoA kinase domain-containing protein OS=Danio rerio GN=dcakd PE=2 SV=1	2e-23
KH.C11.325.v1.A.SL7-1	134	39	194	41	176	38	3.20258	1.20252	4.56818	0.978786	4.20962	1.12719	0.375486	0.214262	0.267765	Q8WV24	sp|Q8WV24|PHLA1_HUMAN Pleckstrin homology-like domain family A member 1 OS=Homo sapiens GN=PHLDA1 PE=1 SV=4	0.058
KH.C11.190.v1.C.SL2-1	1201	175	1130	205	820	178	19.4295	3.65251	18.0112	3.3127	13.276	3.57402	0.187988	0.183924	0.269209	Q7NL02	sp|Q7NL02|HISX_GLOVI Histidinol dehydrogenase OS=Gloeobacter violaceus (strain PCC 7421) GN=hisD PE=3 SV=1	7.4
KH.C3.230.v2.A.SL3-1	280	97	462	86	496	108	6.45863	2.88661	10.4995	1.98148	11.4498	3.0919	0.446939	0.18872	0.270038	O35182	sp|O35182|SMAD6_MOUSE Mothers against decapentaplegic homolog 6 OS=Mus musculus GN=Smad6 PE=1 SV=1	2e-20
KH.C12.89.v1.A.SL3-1	1005	250	1041	236	1373	299	21.029	6.74882	21.461	4.93258	28.7514	7.76503	0.320929	0.229839	0.270075	Q6TLE6	sp|Q6TLE6|CRCM1_DANRE Calcium release-activated calcium channel protein 1 OS=Danio rerio GN=orai1 PE=2 SV=2	2e-33
KH.L20.28.v1.A.SL2-1	651	247	761	173	877	191	18.7774	9.19146	21.6264	4.98435	25.3156	6.83763	0.489497	0.230475	0.270095	Q03161	sp|Q03161|YMY9_YEAST Glucose-6-phosphate 1-epimerase OS=Saccharomyces cerevisiae (strain ATCC 204508 / S288c) GN=YMR099C PE=1 SV=1	1e-08
KH.C3.910.v1.A.SL1-1	1596	227	1825	353	1501	327	42.9658	7.88407	48.406	9.49235	40.4395	10.9259	0.183496	0.196099	0.270178	Q64620	sp|Q64620|PPP6_RAT Serine/threonine-protein phosphatase 6 catalytic subunit OS=Rattus norvegicus GN=Ppp6c PE=2 SV=2	2e-125
KH.C1.892.v1.A.SL2-1	960	195	1118	368	1500	327	37.5471	9.83952	43.0817	14.3768	58.7126	15.8735	0.262058	0.333709	0.270358	Q6AXW7	sp|Q6AXW7|DUS18_RAT Dual specificity protein phosphatase 18 OS=Rattus norvegicus GN=Dusp18 PE=2 SV=1	1e-25
KH.C10.577.v1.A.ND1-1	710	123	696	112	651	142	28.267	6.31772	27.3009	4.45398	25.9381	7.01662	0.223502	0.163144	0.270515	Q568G4	sp|Q568G4|EFC11_DANRE EF-hand calcium-binding domain-containing protein 11 OS=Danio rerio GN=efcab11 PE=2 SV=1	2e-12
KH.C11.103.v1.A.SL4-1	275	98	225	86	481	105	10.3646	4.76517	8.35501	3.23762	18.1426	4.91164	0.459756	0.387506	0.270725	Q9D1C2	sp|Q9D1C2|CBY1_MOUSE Protein chibby homolog 1 OS=Mus musculus GN=Cby1 PE=2 SV=1	5e-20
KH.C4.677.v1.A.SL1-1	2988	437	3063	531	2088	456	45.8578	8.65264	46.3155	8.14022	32.07	8.68593	0.188684	0.175756	0.270843	Q1KKV8	sp|Q1KKV8|MFSD5_TAKRU Major facilitator superfamily domain-containing protein 5 OS=Takifugu rubripes GN=mfsd5 PE=3 SV=1	1e-27
KH.C8.312.v1.A.ND1-1	120	26	211	53	141	31	2.3781	0.664748	4.11982	1.04914	2.79643	0.762482	0.279529	0.254657	0.272663	C7DZK3	sp|C7DZK3|CRA1A_DANRE Collagen alpha-1(XXVII) chain A OS=Danio rerio GN=col27a1a PE=2 SV=1	0.11
KH.L3.9.v4.A.ND1-1	341	56	437	60	100	22	13.4385	2.8472	16.9677	2.36187	3.94394	1.07606	0.211869	0.139198	0.272839	P45386	sp|P45386|IGA4_HAEIF Immunoglobulin A1 protease autotransporter OS=Haemophilus influenzae GN=iga PE=3 SV=1	1.6
KH.C5.340.v1.A.SL1-1	1222	429	1550	423	1992	439	20.7178	9.38349	25.8911	7.16345	33.7985	9.23753	0.452919	0.276676	0.273312	P57775	sp|P57775|FBXW4_HUMAN F-box/WD repeat-containing protein 4 OS=Homo sapiens GN=FBXW4 PE=2 SV=1	9e-21
KH.C2.509.v1.A.SL2-1	1088	182	1050	205	980	216	25.983	5.60747	24.7057	4.89017	23.4219	6.40227	0.215813	0.197937	0.273345	P51156	sp|P51156|RAB26_RAT Ras-related protein Rab-26 OS=Rattus norvegicus GN=Rab26 PE=2 SV=2	3e-41
KH.C1.22.v1.A.ND1-1	4189	905	5278	1754	5785	1276	142.351	39.6766	176.712	59.5373	196.739	53.8171	0.278723	0.336917	0.273546	P61078	sp|P61078|UB2D3_RAT Ubiquitin-conjugating enzyme E2 D3 OS=Rattus norvegicus GN=Ube2d3 PE=2 SV=1	4e-30
KH.C2.1020.v1.A.SL1-1	1752	345	2788	1173	2138	472	22.7173	5.77134	35.6174	15.1925	27.7438	7.59598	0.25405	0.426548	0.27379	Q6GQJ2	sp|Q6GQJ2|JADE1_XENLA Protein Jade-1 OS=Xenopus laevis GN=phf17 PE=2 SV=1	5e-95
KH.C1.789.v1.A.SL1-1	3224	1128	3379	1180	4785	1057	63.0082	28.441	65.0634	23.0352	93.5878	25.6387	0.451386	0.354043	0.273953	P31937	sp|P31937|3HIDH_HUMAN 3-hydroxyisobutyrate dehydrogenase, mitochondrial OS=Homo sapiens GN=HIBADH PE=1 SV=2	3e-70
KH.C1.575.v1.A.SL1-1	2751	841	3421	671	3355	742	38.1869	15.061	46.7868	9.3037	46.6071	12.7834	0.394403	0.198853	0.27428	Q8TB96	sp|Q8TB96|TIP_HUMAN T-cell immunomodulatory protein OS=Homo sapiens GN=ITFG1 PE=1 SV=1	6e-25
KH.C14.25.v1.C.nonSL6-1	188	58	214	54	113	25	6.0451	2.40607	6.77963	1.7344	3.6363	0.99771	0.39802	0.255825	0.274375	Q6DF57	sp|Q6DF57|GPT11_XENTR G patch domain-containing protein 11 OS=Xenopus tropicalis GN=gpatch11 PE=2 SV=1	6e-13
KH.L99.1.v1.A.SL2-1	366	73	777	125	646	143	10.08	2.59379	21.0836	3.43872	17.8052	4.88802	0.257322	0.163099	0.274528	Q8WU66	sp|Q8WU66|TSEAR_HUMAN Thrombospondin-type laminin G domain and EAR repeat-containing protein OS=Homo sapiens GN=TSPEAR PE=1 SV=2	6e-13
KH.C7.430.v2.C.SL1-1	1109	318	1737	533	2289	507	23.6833	8.76137	36.5474	11.3696	48.9206	13.4381	0.369939	0.311093	0.274692	Q90632	sp|Q90632|MOT3_CHICK Monocarboxylate transporter 3 OS=Gallus gallus GN=SLC16A3 PE=2 SV=2	0.0003
KH.L153.27.v1.A.SL3-1	441	155	651	177	338	75	3.35428	1.52099	4.87853	1.34476	2.57284	0.708013	0.453448	0.275648	0.275187	P97819	sp|P97819|PLPL9_MOUSE 85/88 kDa calcium-independent phospholipase A2 OS=Mus musculus GN=Pla2g6 PE=1 SV=3	3e-59
KH.C5.600.v1.A.ND1-1	927	277	1753	461	2298	511	6.72198	2.59138	12.5241	3.33908	16.6764	4.59893	0.385509	0.266613	0.275775	Q80TH2	sp|Q80TH2|LAP2_MOUSE Protein LAP2 OS=Mus musculus GN=Erbb2ip PE=1 SV=3	4e-10
KH.L87.39.v1.A.ND1-1	651	187	614	169	733	163	12.2013	4.5217	11.3381	3.16389	13.7488	3.79168	0.370591	0.279049	0.275783	Q6DC66	sp|Q6DC66|BOKA_DANRE Bcl-2-related ovarian killer protein homolog A OS=Danio rerio GN=boka PE=2 SV=1	2e-06
KH.L153.28.v3.A.SL4-1	948	336	789	238	687	153	8.58631	3.9262	7.0408	2.1532	6.22717	1.71992	0.457262	0.305818	0.276196	Q9BWU0	sp|Q9BWU0|NADAP_HUMAN Kanadaptin OS=Homo sapiens GN=SLC4A1AP PE=1 SV=1	3e-16
KH.L20.16.v1.A.SL1-1	3218	701	3595	835	3760	838	59.2769	16.6591	65.2447	15.3637	69.3143	19.1585	0.281039	0.235478	0.276401	Q96AJ9	sp|Q96AJ9|VTI1A_HUMAN Vesicle transport through interaction with t-SNAREs homolog 1A OS=Homo sapiens GN=VTI1A PE=1 SV=2	5e-28
KH.C7.497.v2.A.SL2-1	330	121	411	140	363	81	5.88693	2.7848	7.22375	2.49466	6.48062	1.79341	0.473049	0.345341	0.276733	Q3MIF4	sp|Q3MIF4|XYLB_RAT Xylulose kinase OS=Rattus norvegicus GN=Xylb PE=2 SV=1	4e-107
KH.L69.3.v1.A.ND1-1	2589	897	2152	567	2312	516	65.823	29.422	53.9057	14.3992	58.8259	16.2822	0.446987	0.267118	0.276787	P55168	sp|P55168|CCNC_CHICK Cyclin-C OS=Gallus gallus GN=CCNC PE=2 SV=1	1e-73
KH.C3.48.v1.C.SL1-1	1987	393	1584	595	1245	278	25.0134	6.38267	19.6461	7.48171	15.6848	4.34349	0.25517	0.380824	0.276923	Q0P5M9	sp|Q0P5M9|MFS10_BOVIN Major facilitator superfamily domain-containing protein 10 OS=Bos taurus GN=MFSD10 PE=2 SV=1	3e-44
KH.C12.302.v2.A.SL3-1	462	128	492	168	700	157	4.89281	1.74888	5.13367	1.77719	7.41907	2.06364	0.357439	0.346184	0.278154	Q3BAN8	sp|Q3BAN8|RR4_PHAAO 30S ribosomal protein S4, chloroplastic OS=Phalaenopsis aphrodite subsp. formosana GN=rps4 PE=3 SV=1	0.42
KH.C3.610.v1.C.ND1-1	766	126	909	201	680	153	10.8361	2.29958	12.6694	2.8402	9.62695	2.6863	0.212215	0.224179	0.27904	P23610	sp|P23610|F8I2_HUMAN Factor VIII intron 22 protein OS=Homo sapiens GN=F8A1 PE=1 SV=2	3e-10
KH.C8.740.v1.A.ND1-1	789	106	599	87	431	97	18.8425	3.26589	14.094	2.07534	10.3009	2.87509	0.173326	0.14725	0.279112	Q9JJ69	sp|Q9JJ69|KCIP2_MOUSE Kv channel-interacting protein 2 OS=Mus musculus GN=Kcnip2 PE=1 SV=2	9.9
KH.C5.604.v1.A.SL1-1	1663	456	2263	561	2137	482	23.4613	8.29965	31.4551	7.90555	30.1717	8.43969	0.353759	0.251328	0.279722	Q58EN8	sp|Q58EN8|VP33B_DANRE Vacuolar protein sorting-associated protein 33B OS=Danio rerio GN=vps33b PE=2 SV=1	8e-84
KH.S115.14.v2.A.SL1-1	2335	514	2946	814	2968	673	34.1665	9.7031	42.471	11.8972	43.4623	12.2221	0.283995	0.280126	0.281212	Q8BQQ1	sp|Q8BQQ1|ZDH14_MOUSE Probable palmitoyltransferase ZDHHC14 OS=Mus musculus GN=Zdhhc14 PE=2 SV=1	8e-74
KH.C3.425.v1.C.SL1-1	2741	762	3448	859	2349	533	47.2176	16.935	58.5206	14.7808	40.4961	11.3957	0.358658	0.252574	0.281402	Q6NS26	sp|Q6NS26|CDKAL_XENLA Threonylcarbamoyladenosine tRNA methylthiotransferase OS=Xenopus laevis GN=cdkal1 PE=2 SV=1	8e-134
KH.C11.136.v2.A.SL1-2	3064	849	3078	658	4104	932	79.4587	28.405	78.6444	17.0446	106.511	29.9977	0.357481	0.21673	0.281638	Q5BK09	sp|Q5BK09|DRAM2_RAT DNA damage-regulated autophagy modulator protein 2 OS=Rattus norvegicus GN=Dram2 PE=2 SV=1	1e-22
KH.C14.453.v1.A.SL1-1	2068	187	3140	416	1968	448	24.9522	2.91094	37.3279	5.01372	23.7639	6.70895	0.116661	0.134316	0.282316	Q8BZ64	sp|Q8BZ64|TECT1_MOUSE Tectonic-1 OS=Mus musculus GN=Tctn1 PE=1 SV=1	0.062
KH.C3.460.v1.A.nonSL2-1	742	135	900	191	382	87	19.3067	4.53182	23.0724	4.96417	9.94725	2.80959	0.234728	0.215156	0.282448	Q0P466	sp|Q0P466|TYW2_DANRE tRNA wybutosine-synthesizing protein 2 homolog OS=Danio rerio GN=trmt12 PE=2 SV=1	3e-39
KH.L125.1.v1.A.SL3-1	515	139	716	148	597	136	10.5281	3.666	14.4212	3.02213	12.2139	3.45065	0.348211	0.209561	0.282519	Q29R99	sp|Q29R99|LIPT2_DANRE Putative lipoyltransferase 2, mitochondrial OS=Danio rerio GN=lipt2 PE=2 SV=1	2e-38
KH.C2.43.v1.A.SL2-2	225	73	286	69	197	45	4.65784	1.94966	5.8333	1.42679	4.08135	1.1562	0.418576	0.244594	0.283289	Q8C8R3	sp|Q8C8R3|ANK2_MOUSE Ankyrin-2 OS=Mus musculus GN=Ank2 PE=1 SV=2	1e-23
KH.C10.21.v1.A.SL1-1	2259	683	2274	521	3743	856	51.3455	20.0282	50.924	11.8286	85.1415	24.1479	0.390067	0.232279	0.28362	Q5RC14	sp|Q5RC14|CK049_PONAB UPF0705 protein C11orf49 homolog OS=Pongo abelii PE=2 SV=1	5e-32
KH.C14.316.v1.A.SL4-1	348	107	380	87	323	74	8.76872	3.47836	9.43381	2.1897	8.14507	2.31423	0.396679	0.232112	0.284127	Q2YDF6	sp|Q2YDF6|RT35_BOVIN 28S ribosomal protein S35, mitochondrial OS=Bos taurus GN=MRPS35 PE=1 SV=1	3e-33
KH.C7.251.v1.C.ND1-1	1506	339	2331	862	2085	478	11.9396	3.46736	18.2076	6.82623	16.5427	4.70339	0.290408	0.37491	0.284319	Q4L1J4	sp|Q4L1J4|MAGI1_RAT Membrane-associated guanylate kinase, WW and PDZ domain-containing protein 1 OS=Rattus norvegicus GN=Magi1 PE=1 SV=1	3e-38
KH.C12.664.v1.B.ND1-1	319	61	573	55	410	94	5.91819	1.46003	10.4737	1.01922	7.61233	2.16444	0.246702	0.0973129	0.284333	Q91X34	sp|Q91X34|BAAT_MOUSE Bile acid-CoA:amino acid N-acyltransferase OS=Mus musculus GN=Baat PE=1 SV=1	6e-21
KH.C4.491.v1.A.SL1-1	1869	687	1693	603	2322	533	61.1727	29.0095	54.5949	19.714	76.0582	21.6518	0.474222	0.361096	0.284674	Q5XH61	sp|Q5XH61|BCL7A_XENLA B-cell CLL/lymphoma 7 protein family member A OS=Xenopus laevis GN=bcl7a PE=2 SV=1	2e-13
KH.L139.17.v1.A.SL1-1	1888	167	2272	216	1301	299	28.3325	3.2332	33.5921	3.23776	19.5387	5.56894	0.114117	0.0963847	0.285021	P39963	sp|P39963|CCNB3_CHICK G2/mitotic-specific cyclin-B3 OS=Gallus gallus GN=CCNB3 PE=2 SV=1	5e-42
KH.C2.640.v1.A.SL2-1	1090	225	1208	315	979	225	25.4064	6.76602	27.7415	7.33391	22.8368	6.50905	0.266312	0.264366	0.285025	Q3ZCD7	sp|Q3ZCD7|TECR_BOVIN Very-long-chain enoyl-CoA reductase OS=Bos taurus GN=TECR PE=2 SV=1	2e-76
KH.C2.998.v1.A.nonSL10-1	173	46	222	78	187	43	4.31026	1.4786	5.4495	1.94116	4.66267	1.32967	0.343041	0.356208	0.285174	Q5R573	sp|Q5R573|RBL2A_PONAB Rab-like protein 2A OS=Pongo abelii GN=RABL2A PE=2 SV=1	4e-56
KH.S164.27.v1.A.SL1-1	2079	497	2885	738	2916	672	47.8134	14.7464	65.3714	16.9535	67.1148	19.1815	0.308416	0.259342	0.285802	Q8KQL2	sp|Q8KQL2|ARPD_ENTAV D-arabitol-phosphate dehydrogenase OS=Enterococcus avium PE=1 SV=1	2e-07
KH.C1.1033.v1.A.SL1-1	689	185	834	202	828	191	13.2736	4.59806	15.83	3.88713	15.9637	4.56689	0.346407	0.245554	0.286079	Q4QQW3	sp|Q4QQW3|HOT_RAT Hydroxyacid-oxoacid transhydrogenase, mitochondrial OS=Rattus norvegicus GN=Adhfe1 PE=1 SV=1	9e-101
KH.C2.498.v1.A.nonSL2-1	568	72	677	118	377	87	10.9629	1.79285	12.8739	2.27493	7.28204	2.08408	0.163538	0.176708	0.286194	Q9BVA6	sp|Q9BVA6|FICD_HUMAN Adenosine monophosphate-protein transferase FICD OS=Homo sapiens GN=FICD PE=1 SV=2	4e-54
KH.C9.506.v1.A.SL2-1	348	122	331	74	290	67	8.36213	3.78209	7.83632	1.77615	6.97383	1.99817	0.452288	0.226655	0.286523	Q5RJL2	sp|Q5RJL2|MET23_RAT Methyltransferase-like protein 23 OS=Rattus norvegicus GN=Mettl23 PE=2 SV=1	4e-11
KH.L121.1.v2.A.ND2-2	949	103	1315	97	743	172	15.8987	2.22621	21.7053	1.62321	12.4571	3.57636	0.140025	0.074784	0.287093	Q6P0U0	sp|Q6P0U0|NAGA_DANRE Putative N-acetylglucosamine-6-phosphate deacetylase OS=Danio rerio GN=amdhd2 PE=2 SV=1	2e-86
KH.C14.216.v1.A.nonSL2-1	318	106	311	108	443	103	12.5004	5.37571	12.0449	4.24061	17.4275	5.02518	0.430044	0.352067	0.288348	0	0	0
KH.L71.10.v1.A.ND1-1	646	105	693	140	952	222	10.9225	2.29041	11.5444	2.36443	16.1088	4.65867	0.209696	0.204813	0.289201	Q9CPY6	sp|Q9CPY6|GID4_MOUSE Glucose-induced degradation protein 4 homolog OS=Mus musculus GN=Gid4 PE=2 SV=1	2e-59
KH.C1.948.v1.A.SL1-1	2593	916	2597	425	2778	648	52.1513	23.768	51.4613	8.53808	55.9153	16.1755	0.455751	0.165913	0.289285	Q6Y1H2	sp|Q6Y1H2|HACD2_HUMAN Very-long-chain (3R)-3-hydroxyacyl-[acyl-carrier protein] dehydratase 2 OS=Homo sapiens GN=PTPLB PE=1 SV=1	3e-32
KH.L108.59.v1.A.SL1-1	510	147	544	196	514	120	9.41673	3.50172	9.89636	3.61489	9.49792	2.74998	0.371862	0.365275	0.289535	Q28P47	sp|Q28P47|RHAM_JANSC L-rhamnose mutarotase OS=Jannaschia sp. (strain CCS1) GN=rhaM PE=3 SV=1	0.094
KH.C5.178.v1.A.SL1-1	1243	261	1816	505	1236	290	17.4726	4.73328	25.1507	7.09067	17.3877	5.05946	0.270897	0.281928	0.29098	Q32NR9	sp|Q32NR9|FRITZ_XENLA WD repeat-containing and planar cell polarity effector protein fritz homolog OS=Xenopus laevis GN=wdpcp PE=1 SV=1	5e-42
KH.C1.1227.v1.A.ND1-1	417	46	409	144	507	119	8.79652	1.25189	8.5005	3.03421	10.7033	3.11559	0.142317	0.356945	0.291087	Q62210	sp|Q62210|BIRC2_MOUSE Baculoviral IAP repeat-containing protein 2 OS=Mus musculus GN=Birc2 PE=1 SV=1	5e-17
KH.L46.7.v2.B.SL4-1	222	68	254	95	213	50	4.77372	1.88646	5.38126	2.0405	4.58373	1.33442	0.395176	0.379186	0.291121	Q8IUS5	sp|Q8IUS5|EPHX4_HUMAN Epoxide hydrolase 4 OS=Homo sapiens GN=EPHX4 PE=2 SV=2	3e-26
KH.C1.380.v1.A.nonSL3-1	1026	227	1613	393	1508	354	10.7705	3.07431	16.6828	4.12087	15.8425	4.61221	0.285439	0.247013	0.291129	Q6ZQ11	sp|Q6ZQ11|CHSS1_MOUSE Chondroitin sulfate synthase 1 OS=Mus musculus GN=Chsy1 PE=2 SV=2	5e-20
KH.L153.18.v1.A.ND1-1	593	125	835	214	770	181	9.49951	2.5834	13.1789	3.42428	12.3445	3.59869	0.27195	0.25983	0.291522	Q9BT17	sp|Q9BT17|MTG1_HUMAN Mitochondrial ribosome-associated GTPase 1 OS=Homo sapiens GN=MTG1 PE=1 SV=2	1e-35
KH.S1266.1.v1.A.nonSL4-1	557	144	634	170	415	98	10.2907	3.4323	11.5405	3.13723	7.67311	2.24715	0.333535	0.271845	0.292861	Q9UBI4	sp|Q9UBI4|STML1_HUMAN Stomatin-like protein 1 OS=Homo sapiens GN=STOML1 PE=1 SV=1	1e-19
KH.C12.381.v1.C.ND1-1	1708	264	2005	246	1155	273	46.2211	9.21702	53.458	6.64961	31.2802	9.16924	0.199412	0.124389	0.293133	Q9JHN8	sp|Q9JHN8|STK19_MOUSE Serine/threonine-protein kinase 19 OS=Mus musculus GN=Stk19 PE=2 SV=2	7e-22
KH.C4.193.v1.A.nonSL2-1	403	132	268	54	313	74	25.3659	10.719	16.6198	3.39506	19.7163	5.7809	0.422574	0.204278	0.293205	A7S6M8	sp|A7S6M8|LTOR4_NEMVE Ragulator complex protein LAMTOR4 homolog OS=Nematostella vectensis GN=v1g232793 PE=3 SV=1	0.024
KH.C2.1019.v1.A.SL1-1	1031	222	1504	600	961	228	9.32449	2.59032	13.4017	5.42034	8.69811	2.55929	0.277798	0.404451	0.294235	Q7VUD2	sp|Q7VUD2|URE2_BORPE Urease subunit beta OS=Bordetella pertussis (strain Tohama I / ATCC BAA-589 / NCTC 13251) GN=ureB PE=3 SV=1	3.6
KH.L7.22.v1.C.ND1-1	413	140	652	249	585	139	4.37835	1.9148	6.81011	2.63675	6.20657	1.82892	0.437333	0.387181	0.294674	F1N6G5	sp|F1N6G5|HACE1_BOVIN E3 ubiquitin-protein ligase HACE1 OS=Bos taurus GN=HACE1 PE=3 SV=3	6e-80
KH.L7.24.v1.A.nonSL2-1	115	33	139	34	105	25	1.64177	0.607803	1.95513	0.484844	1.50016	0.442969	0.370212	0.247986	0.29528	Q8TEQ0	sp|Q8TEQ0|SNX29_HUMAN Sorting nexin-29 OS=Homo sapiens GN=SNX29 PE=1 SV=3	1e-38
KH.C8.210.v1.A.nonSL3-1	702	183	885	170	927	221	12.2353	4.11493	15.1973	2.95961	16.1693	4.78066	0.336317	0.194746	0.295662	Q6EW67	sp|Q6EW67|MATK_NYMAL Maturase K OS=Nymphaea alba GN=matK PE=3 SV=2	0.25
KH.C2.624.v1.A.SL1-1	3754	748	6168	1797	3369	804	34.9687	8.98921	56.6078	16.7202	31.4067	9.29524	0.257064	0.29537	0.295964	Q98936	sp|Q98936|PTPRG_CHICK Receptor-type tyrosine-protein phosphatase gamma OS=Gallus gallus GN=PTPRG PE=2 SV=1	6e-57
KH.C2.311.v1.A.ND1-1	1203	437	1246	376	1177	281	37.2938	17.4778	38.0571	11.6431	36.516	10.8118	0.468652	0.305937	0.296083	B4S5J8	sp|B4S5J8|TATA_PROA2 Sec-independent protein translocase protein TatA OS=Prosthecochloris aestuarii (strain DSM 271 / SK 413) GN=tatA PE=3 SV=1	0.72
KH.C11.653.v1.A.ND2-1	1295	227	1294	403	1302	311	25.5659	5.78165	25.1694	7.94704	25.724	7.62028	0.226147	0.315743	0.296233	Q6SPF0	sp|Q6SPF0|SAMD1_HUMAN Atherin OS=Homo sapiens GN=SAMD1 PE=1 SV=1	4e-13
KH.C1.977.v1.A.SL2-1	690	223	846	130	611	146	12.1008	5.04548	14.6177	2.27728	10.7236	3.17786	0.416956	0.155789	0.296343	Q3ZCX4	sp|Q3ZCX4|ZN568_HUMAN Zinc finger protein 568 OS=Homo sapiens GN=ZNF568 PE=2 SV=2	7e-63
KH.C5.634.v2.A.SL2-1	768	217	807	196	630	151	21.4748	7.82819	22.2324	5.47435	17.6296	5.24038	0.36453	0.246232	0.297249	Q499W2	sp|Q499W2|SLD5_RAT DNA replication complex GINS protein SLD5 OS=Rattus norvegicus GN=Gins4 PE=2 SV=1	4e-05
KH.L20.53.v1.B.ND1-1	2066	313	3421	804	2841	682	11.1372	2.17684	18.1696	4.32924	15.3269	4.563	0.195456	0.238268	0.297712	Q8CFW7	sp|Q8CFW7|C2D2A_MOUSE Coiled-coil and C2 domain-containing protein 2A OS=Mus musculus GN=Cc2d2a PE=1 SV=1	8e-119
KH.C11.134.v1.R.ND1-1	554	115	463	75	548	132	15.1636	4.06093	12.4859	2.05052	15.011	4.48422	0.267807	0.164226	0.298729	Q9Y256	sp|Q9Y256|FACE2_HUMAN CAAX prenyl protease 2 OS=Homo sapiens GN=RCE1 PE=1 SV=1	6e-15
KH.L173.4.v1.A.nonSL5-1	668	187	941	346	469	113	9.03069	3.26152	12.5337	4.67228	6.34531	1.89601	0.36116	0.372777	0.298806	Q8HY87	sp|Q8HY87|RNZ2_MACFA Zinc phosphodiesterase ELAC protein 2 OS=Macaca fascicularis GN=ELAC2 PE=2 SV=1	1e-06
KH.C11.694.v1.A.ND1-1	2798	833	3342	1123	2261	545	40.4276	15.5278	47.5754	16.2076	32.6938	9.77339	0.384089	0.340671	0.298937	A4QN56	sp|A4QN56|NAGT1_DANRE Sodium-dependent glucose transporter 1 OS=Danio rerio GN=naglt1 PE=2 SV=1	1e-15
KH.C9.828.v1.A.SL1-1	4188	1116	6366	756	1634	394	76.5552	26.3188	114.652	13.8038	29.892	8.93887	0.343789	0.120398	0.299039	Q5ZJ66	sp|Q5ZJ66|SYEM_CHICK Probable glutamate--tRNA ligase, mitochondrial OS=Gallus gallus GN=EARS2 PE=2 SV=1	3e-63
KH.C8.875.v1.A.SL1-1	1807	278	2806	630	1551	374	26.4282	5.24551	40.4336	9.20361	22.7016	6.7889	0.198482	0.227623	0.29905	Q9H5Z1	sp|Q9H5Z1|DHX35_HUMAN Probable ATP-dependent RNA helicase DHX35 OS=Homo sapiens GN=DHX35 PE=1 SV=2	1e-132
KH.L162.2.v1.A.SL1-1	1392	247	1674	455	1076	260	19.4004	4.44124	22.9866	6.33422	15.0079	4.49743	0.228924	0.275561	0.299671	Q5U3N0	sp|Q5U3N0|PKHA8_DANRE Pleckstrin homology domain-containing family A member 8 OS=Danio rerio GN=plekha8 PE=2 SV=1	2e-29
KH.L152.28.v3.A.SL3-1	1157	393	1710	623	2498	604	13.4941	5.91342	19.6496	7.25786	29.1568	8.74314	0.438221	0.369364	0.299866	Q15256	sp|Q15256|PTPRR_HUMAN Receptor-type tyrosine-protein phosphatase R OS=Homo sapiens GN=PTPRR PE=1 SV=2	5e-43
KH.C1.77.v1.A.nonSL3-1	517	113	731	120	310	75	4.88318	1.37697	6.80262	1.13215	2.93028	0.879209	0.281983	0.166428	0.300043	Q01804	sp|Q01804|OTUD4_HUMAN OTU domain-containing protein 4 OS=Homo sapiens GN=OTUD4 PE=1 SV=3	7e-15
KH.L8.8.v2.A.ND1-1	1273	303	2215	375	1411	342	8.02072	2.46299	13.7501	2.36007	8.89708	2.67442	0.307078	0.171641	0.300595	Q05688	sp|Q05688|IGF1R_BOVIN Insulin-like growth factor 1 receptor (Fragment) OS=Bos taurus GN=IGF1R PE=2 SV=1	5e-77
KH.C13.109.v2.A.SL1-1	428	157	645	160	878	213	11.4626	5.42468	17.0195	4.28025	23.5326	7.08008	0.47325	0.251491	0.300863	Q96AT9	sp|Q96AT9|RPE_HUMAN Ribulose-phosphate 3-epimerase OS=Homo sapiens GN=RPE PE=1 SV=1	5e-57
KH.L65.26.v1.B.SL1-1	876	217	1099	181	915	222	10.6816	3.41371	13.2031	2.20455	11.1658	3.35972	0.319588	0.166972	0.300895	Q0D2E8	sp|Q0D2E8|RFT1_XENTR Protein RFT1 homolog OS=Xenopus tropicalis GN=rft1 PE=2 SV=1	3e-66
KH.S460.1.v1.A.SL2-1	439	128	463	110	416	101	13.8019	5.19183	14.3418	3.45444	13.0889	3.94109	0.376166	0.240865	0.3011	Q8N8Q8	sp|Q8N8Q8|COX18_HUMAN Mitochondrial inner membrane protein COX18 OS=Homo sapiens GN=COX18 PE=2 SV=1	4e-06
KH.C5.65.v1.A.SL1-1	898	288	1066	322	1377	335	10.9973	4.55026	12.8621	3.93889	16.8764	5.09182	0.413762	0.306239	0.301713	Q00536	sp|Q00536|CDK16_HUMAN Cyclin-dependent kinase 16 OS=Homo sapiens GN=CDK16 PE=1 SV=1	1e-84
KH.C2.321.v5.A.SL5-1	820	233	1149	231	1130	275	14.2361	5.21875	19.6536	4.00587	19.6332	5.92554	0.366586	0.203824	0.301813	Q8VI63	sp|Q8VI63|MOB2_MOUSE MOB kinase activator 2 OS=Mus musculus GN=Mob2 PE=2 SV=1	1e-29
KH.L144.16.v1.A.ND1-1	501	65	556	65	390	95	16.1933	2.71047	17.7059	2.09855	12.6153	3.811	0.167382	0.118523	0.302094	Q5R7L8	sp|Q5R7L8|BL1S1_PONAB Biogenesis of lysosome-related organelles complex 1 subunit 1 OS=Pongo abelii GN=BLOC1S1 PE=2 SV=2	2e-15
KH.C7.785.v1.A.ND1-1	775	209	721	167	926	226	22.6056	7.86494	20.7203	4.86564	27.031	8.18167	0.34792	0.234825	0.302678	Q921J2	sp|Q921J2|RHEB_MOUSE GTP-binding protein Rheb OS=Mus musculus GN=Rheb PE=1 SV=1	4e-46
KH.S437.5.v1.A.SL2-1	969	347	1356	334	1364	333	20.2213	9.34221	27.8799	6.96211	28.4863	8.6248	0.461998	0.249718	0.30277	Q6XUZ5	sp|Q6XUZ5|IDHC_SHEEP Isocitrate dehydrogenase [NADP] cytoplasmic OS=Ovis aries GN=IDH1 PE=2 SV=1	2e-150
KH.C2.324.v2.A.SL2-2	139	43	191	48	135	33	6.30032	2.5145	8.52958	2.17319	6.12375	1.85644	0.399106	0.254783	0.303154	P70582	sp|P70582|NUP54_RAT Nuclear pore complex protein Nup54 OS=Rattus norvegicus GN=Nup54 PE=1 SV=1	2e-09
KH.C8.758.v1.A.SL1-1	477	72	633	125	613	150	11.2617	2.19307	14.7244	2.94785	14.4838	4.39538	0.194737	0.200202	0.303469	Q5RFI2	sp|Q5RFI2|RAB28_PONAB Ras-related protein Rab-28 OS=Pongo abelii GN=RAB28 PE=2 SV=1	5e-40
KH.L57.19.v1.A.SL2-1	712	259	716	306	1070	262	24.4897	11.4931	24.264	10.5132	36.8318	11.1847	0.469304	0.433282	0.303669	Q86I22	sp|Q86I22|FAHD1_DICDI Acylpyruvase FAHD1, mitochondrial OS=Dictyostelium discoideum GN=fahd1 PE=3 SV=1	3e-38
KH.L95.11.v2.A.SL2-2	1298	437	1816	672	1980	485	14.4918	6.29452	19.976	7.4942	22.1232	6.72059	0.434351	0.375159	0.30378	Q8K212	sp|Q8K212|PACS1_MOUSE Phosphofurin acidic cluster sorting protein 1 OS=Mus musculus GN=Pacs1 PE=2 SV=2	3e-33
KH.C7.57.v1.A.ND1-1	2612	792	3013	1230	3416	837	43.2464	16.9175	49.1498	20.3419	56.6017	17.1997	0.391189	0.413874	0.303872	Q499P8	sp|Q499P8|CP058_RAT UPF0420 protein C16orf58 homolog OS=Rattus norvegicus PE=2 SV=1	5e-44
KH.C2.303.v1.A.ND1-1	325	39	382	48	301	74	14.0941	2.18199	16.3216	2.07923	13.0634	3.98294	0.154816	0.127391	0.304894	O35226	sp|O35226|PSMD4_MOUSE 26S proteasome non-ATPase regulatory subunit 4 OS=Mus musculus GN=Psmd4 PE=1 SV=1	0.019
KH.L129.3.v1.A.SL1-1	1294	481	2103	847	2118	521	12.8424	6.15873	20.5635	8.39661	21.0365	6.41753	0.479562	0.408326	0.305067	Q66HA5	sp|Q66HA5|C2D1A_RAT Coiled-coil and C2 domain-containing protein 1A OS=Rattus norvegicus GN=Cc2d1a PE=2 SV=2	4e-09
KH.C12.445.v1.B.nonSL2-1	877	179	1599	646	748	184	13.1418	3.46052	23.6074	9.66931	11.2174	3.42208	0.263322	0.409587	0.30507	Q8BLK9	sp|Q8BLK9|KS6C1_MOUSE Ribosomal protein S6 kinase delta-1 OS=Mus musculus GN=Rps6kc1 PE=1 SV=2	4e-28
KH.C7.536.v1.A.SL2-1	1072	152	1220	306	905	223	13.97	2.55552	15.6642	3.9832	11.8028	3.60683	0.182929	0.254287	0.30559	Q12236	sp|Q12236|PKH2_YEAST Serine/threonine-protein kinase PKH2 OS=Saccharomyces cerevisiae (strain ATCC 204508 / S288c) GN=PKH2 PE=1 SV=1	0.002
KH.C1.1285.v1.A.SL1-1	2463	284	2478	201	914	226	80.4451	11.9671	79.7412	6.55753	29.8756	9.16141	0.148761	0.0822351	0.306652	B5XBP5	sp|B5XBP5|CA074_SALSA UPF0739 protein C1orf74 homolog OS=Salmo salar PE=2 SV=1	0.0004
KH.C4.774.v1.A.SL1-1	3979	1263	4313	1109	5112	1265	90.9719	37.2538	97.1536	25.3264	116.966	35.8957	0.409509	0.260684	0.30689	Q5M7T4	sp|Q5M7T4|YIPF4_RAT Protein YIPF4 OS=Rattus norvegicus GN=Yipf4 PE=2 SV=1	7e-54
KH.L133.7.v2.A.ND2-2	546	139	715	246	513	127	17.4125	5.71895	22.4657	7.83631	16.3727	5.02678	0.32844	0.348812	0.307022	O13849	sp|O13849|CBPY_SCHPO Carboxypeptidase Y OS=Schizosaccharomyces pombe (strain 972 / ATCC 24843) GN=cpy1 PE=1 SV=1	4e-08
KH.L18.22.v1.A.SL1-1	547	166	781	125	957	237	9.35032	3.66085	13.1534	2.13431	16.3714	5.02813	0.391521	0.162264	0.307128	Q3T001	sp|Q3T001|H17B6_BOVIN 17-beta-hydroxysteroid dehydrogenase type 6 OS=Bos taurus GN=HSD17B6 PE=2 SV=1	4e-14
KH.C14.173.v1.A.SL1-1	565	102	748	171	632	157	10.5323	2.45307	13.738	3.18406	11.7904	3.63241	0.232909	0.23177	0.308082	Q6Z8M8	sp|Q6Z8M8|SPL15_ORYSJ Squamosa promoter-binding-like protein 15 OS=Oryza sativa subsp. japonica GN=SPL15 PE=2 SV=1	0.85
KH.C9.422.v1.A.SL1-1	3197	905	4006	862	4100	1019	39.3533	14.3721	48.5843	10.5988	50.5078	15.568	0.365208	0.218152	0.308229	Q15398	sp|Q15398|DLGP5_HUMAN Disks large-associated protein 5 OS=Homo sapiens GN=DLGAP5 PE=1 SV=2	3e-08
KH.C8.290.v1.A.SL1-1	1939	301	2292	463	1624	404	19.5179	3.9089	22.7308	4.65526	16.3597	5.04724	0.200273	0.204799	0.308517	P29503	sp|P29503|NEUR_DROME Protein neuralized OS=Drosophila melanogaster GN=neur PE=1 SV=2	1e-18
KH.C9.711.v2.R.ND1-1	408	99	519	185	257	64	6.9858	2.18688	8.75528	3.164	4.40377	1.36005	0.313047	0.361382	0.308838	Q5T9C9	sp|Q5T9C9|PI5L1_HUMAN Phosphatidylinositol 4-phosphate 5-kinase-like protein 1 OS=Homo sapiens GN=PIP5KL1 PE=2 SV=2	2e-27
KH.C2.1085.v1.A.SL1-1	2356	189	1959	185	542	135	39.8567	4.12499	32.6518	3.12613	9.17617	2.83452	0.103495	0.0957414	0.3089	Q8AVI4	sp|Q8AVI4|SHOC2_XENLA Leucine-rich repeat protein SHOC-2 OS=Xenopus laevis GN=shoc2 PE=2 SV=1	0.005
KH.C4.557.v1.A.ND1-1	1065	341	1355	254	1424	355	22.2545	9.19301	27.8968	5.30166	29.7793	9.20696	0.413085	0.190045	0.309173	Q5EAD5	sp|Q5EAD5|PGTB1_BOVIN Geranylgeranyl transferase type-1 subunit beta OS=Bos taurus GN=PGGT1B PE=2 SV=1	3e-72
KH.L61.8.v1.A.ND1-1	371	51	348	71	389	97	6.94507	1.23171	6.41842	1.32761	7.28765	2.25368	0.17735	0.206843	0.309247	0	0	0
KH.C14.588.v1.A.SL1-1	2830	639	3608	914	2912	727	34.822	10.1438	43.7401	11.2337	35.8586	11.1025	0.291306	0.256828	0.309618	Q6ZPR5	sp|Q6ZPR5|NSMA3_MOUSE Sphingomyelin phosphodiesterase 4 OS=Mus musculus GN=Smpd4 PE=2 SV=2	8e-20
KH.C3.481.v1.A.SL2-1	1129	211	1274	231	960	240	28.0614	6.76599	31.1983	5.73503	23.8793	7.40363	0.241114	0.183825	0.310044	Q6NWF4	sp|Q6NWF4|VPS25_DANRE Vacuolar protein-sorting-associated protein 25 OS=Danio rerio GN=vps25 PE=2 SV=2	1e-21
KH.C13.176.v1.R.ND1-1	447	118	539	145	336	84	7.90607	2.69259	9.39266	2.56171	5.94741	1.84396	0.340572	0.272736	0.310044	B5X1G3	sp|B5X1G3|GPHR_SALSA Golgi pH regulator OS=Salmo salar GN=gpr89 PE=2 SV=1	5e-73
KH.S2142.1.v1.A.SL2-1	205	70	269	79	360	90	7.92811	3.4926	10.2498	3.05177	13.9333	4.31994	0.440533	0.29774	0.310044	P39447	sp|P39447|ZO1_MOUSE Tight junction protein ZO-1 OS=Mus musculus GN=Tjp1 PE=1 SV=2	0.82
KH.C8.457.v1.A.SL1-1	1269	473	1997	845	2238	560	4.84621	2.33043	7.5139	3.22334	8.55336	2.65429	0.480877	0.428984	0.310321	P70039	sp|P70039|APC_XENLA Adenomatous polyposis coli homolog OS=Xenopus laevis GN=apc PE=1 SV=2	3e-46
KH.C4.629.v1.A.SL2-1	385	55	784	130	547	137	5.22526	0.963039	10.4836	1.76238	7.42967	2.30774	0.184305	0.168109	0.310611	Q8VC30	sp|Q8VC30|DHAK_MOUSE Bifunctional ATP-dependent dihydroxyacetone kinase/FAD-AMP lyase (cyclizing) OS=Mus musculus GN=Dak PE=2 SV=1	3e-49
KH.C3.715.v1.A.SL1-1	2007	384	1801	380	1340	336	34.2885	8.46382	30.3152	6.48475	22.9108	7.12457	0.246842	0.213911	0.31097	Q96NW4	sp|Q96NW4|ANR27_HUMAN Ankyrin repeat domain-containing protein 27 OS=Homo sapiens GN=ANKRD27 PE=1 SV=2	6e-06
KH.L57.12.v1.A.SL1-1	534	165	559	148	562	141	16.5544	6.59917	17.0738	4.58291	17.4358	5.42512	0.398637	0.268418	0.311147	Q5ZKX9	sp|Q5ZKX9|ERD22_CHICK ER lumen protein retaining receptor 2 OS=Gallus gallus GN=KDELR2 PE=2 SV=1	2e-28
KH.C1.824.v1.A.SL1-1	5447	1009	7412	2140	4257	1069	61.0773	14.5965	81.8849	23.9687	47.7707	14.8771	0.238984	0.292712	0.311428	Q9Z110	sp|Q9Z110|P5CS_MOUSE Delta-1-pyrroline-5-carboxylate synthase OS=Mus musculus GN=Aldh18a1 PE=2 SV=2	4e-145
KH.C2.1071.v2.A.SL1-1	588	137	1091	224	1198	301	10.5683	3.17673	19.3196	4.02145	21.5486	6.71446	0.300592	0.208154	0.311597	P38571	sp|P38571|LICH_HUMAN Lysosomal acid lipase/cholesteryl ester hydrolase OS=Homo sapiens GN=LIPA PE=1 SV=2	9e-31
KH.C3.370.v1.C.ND1-1	177	44	272	108	167	42	5.22161	1.67463	7.90582	3.18247	4.93041	1.5378	0.320711	0.402548	0.311901	P38892	sp|P38892|CRG1_YEAST Probable S-adenosylmethionine-dependent methyltransferase CRG1 OS=Saccharomyces cerevisiae (strain ATCC 204508 / S288c) GN=CRG1 PE=1 SV=1	0.002
KH.C1.64.v1.A.SL2-1	299	65	273	40	302	76	6.19801	1.73832	5.57558	0.828228	6.26503	1.9553	0.280464	0.148546	0.312097	0	0	0
KH.L63.16.v1.A.ND1-1	377	123	359	145	389	98	13.1416	5.53155	12.3296	5.04875	13.5704	4.23987	0.420919	0.409483	0.312435	Q64471	sp|Q64471|GSTT1_MOUSE Glutathione S-transferase theta-1 OS=Mus musculus GN=Gstt1 PE=1 SV=4	8e-16
KH.C12.314.v1.A.SL1-1	1631	294	1421	462	607	153	30.3131	7.04949	26.0206	8.57683	11.2902	3.52928	0.232556	0.329618	0.312598	O74889	sp|O74889|SAC31_SCHPO SAC3 family protein 1 OS=Schizosaccharomyces pombe (strain 972 / ATCC 24843) GN=SPCC576.05 PE=1 SV=1	3.6
KH.C9.298.v2.A.ND3-1	138	44	151	48	202	51	3.46602	1.42573	3.73658	1.20421	5.07736	1.58979	0.411347	0.322275	0.313114	F6W3G8	sp|F6W3G8|MTND_CIOIN 1,2-dihydroxy-3-keto-5-methylthiopentene dioxygenase OS=Ciona intestinalis PE=3 SV=1	4e-83
KH.C2.120.v1.A.SL1-1	811	240	926	216	953	241	36.8669	14.0754	41.4738	9.80796	43.3555	13.5973	0.38179	0.236486	0.313623	Q5EA33	sp|Q5EA33|ANR49_BOVIN Ankyrin repeat domain-containing protein 49 OS=Bos taurus GN=ANKRD49 PE=2 SV=1	1e-17
KH.L11.6.v1.A.nonSL7-1	171	63	171	44	170	43	3.40398	1.61795	3.35377	0.874888	3.38669	1.06238	0.475312	0.260867	0.313692	Q01105	sp|Q01105|SET_HUMAN Protein SET OS=Homo sapiens GN=SET PE=1 SV=3	2e-29
KH.L18.50.v4.A.SL8-1	506	116	650	174	395	100	14.136	4.1809	17.8911	4.85551	11.0436	3.46733	0.295762	0.271393	0.313969	Q03123	sp|Q03123|T2FB_XENLA General transcription factor IIF subunit 2 OS=Xenopus laevis GN=gtf2f2 PE=2 SV=1	2e-38
KH.C7.432.v2.A.SL3-1	944	346	853	214	782	198	36.5535	17.2849	32.5426	8.27712	30.3039	9.5157	0.472866	0.254347	0.314009	P10600	sp|P10600|TGFB3_HUMAN Transforming growth factor beta-3 OS=Homo sapiens GN=TGFB3 PE=1 SV=1	8.8
KH.C10.592.v2.A.ND2-1	2177	554	2531	722	931	236	40.125	13.1735	45.9616	13.2924	17.1728	5.39868	0.328311	0.289206	0.314373	Q6NS23	sp|Q6NS23|TRM11_XENLA tRNA (guanine(10)-N2)-methyltransferase homolog OS=Xenopus laevis GN=trmt11 PE=2 SV=1	7e-53
KH.C4.737.v1.A.SL2-1	1718	582	2692	976	1321	335	14.909	6.51602	23.0169	8.46027	11.4726	3.60819	0.437053	0.367568	0.314503	O13046	sp|O13046|WDHD1_XENLA WD repeat and HMG-box DNA-binding protein 1 OS=Xenopus laevis GN=wdhd1 PE=1 SV=1	1e-66
KH.L116.68.v1.A.SL3-1	614	219	560	208	753	191	17.0918	7.86498	15.3587	5.78351	20.9773	6.59889	0.460161	0.376563	0.314573	Q9CQW0	sp|Q9CQW0|EMC6_MOUSE ER membrane protein complex subunit 6 OS=Mus musculus GN=Emc6 PE=2 SV=1	1e-14
KH.C4.152.v1.A.SL2-1	2327	848	2446	797	2755	699	65.8971	30.9813	68.2453	22.5443	78.0777	24.5678	0.470147	0.330342	0.314658	Q5ZHV7	sp|Q5ZHV7|SPRY7_CHICK SPRY domain-containing protein 7 OS=Gallus gallus GN=SPRYD7 PE=2 SV=1	4e-23
KH.L28.3.v1.A.SL1-1	1850	322	1810	331	1278	325	48.0161	10.7822	46.285	8.58128	33.1957	10.4693	0.224553	0.185401	0.315381	Q9E784	sp|Q9E784|L_BEFVB RNA-directed RNA polymerase L OS=Bovine ephemeral fever virus (strain BB7721) GN=L PE=3 SV=1	9.5
KH.C12.399.v1.A.SL1-1	1722	415	2026	637	1714	436	28.9111	8.98905	33.5133	10.6827	28.799	9.08524	0.31092	0.318759	0.315471	Q7ZXF5	sp|Q7ZXF5|FACR1_XENLA Fatty acyl-CoA reductase 1 OS=Xenopus laevis GN=far1 PE=2 SV=1	3e-41
KH.C1.540.v1.A.SL1-1	796	290	659	155	463	118	28.7797	13.5271	23.475	5.59776	16.7529	5.2951	0.470023	0.238456	0.316071	Q498J9	sp|Q498J9|MBLC1_XENLA Metallo-beta-lactamase domain-containing protein 1 OS=Xenopus laevis GN=mblac1 PE=2 SV=2	6e-23
KH.C4.16.v1.A.SL2-1	187	49	249	52	149	38	4.60738	1.55755	6.04447	1.27975	3.67396	1.16202	0.338056	0.211722	0.316287	Q8R2R5	sp|Q8R2R5|LRC61_MOUSE Leucine-rich repeat-containing protein 61 OS=Mus musculus GN=Lrrc61 PE=2 SV=1	7e-17
KH.L170.60.v2.A.SL3-1	603	135	811	318	682	174	10.0426	2.90065	13.3075	5.2901	11.367	3.59663	0.288836	0.397529	0.316409	Q7T105	sp|Q7T105|MIER1_XENLA Mesoderm induction early response protein 1 OS=Xenopus laevis GN=mier1 PE=2 SV=1	8e-28
KH.C4.526.v1.A.SL1-1	1136	206	1062	419	1265	323	28.0782	6.56891	25.862	10.3446	31.2909	9.90861	0.23395	0.399993	0.316662	0	0	0
KH.C5.517.v1.A.SL1-1	3372	475	3288	1427	2231	570	48.1838	8.75671	46.2905	20.3679	31.9042	10.109	0.181736	0.440002	0.316854	Q810K9	sp|Q810K9|GXLT2_MOUSE Glucoside xylosyltransferase 2 OS=Mus musculus GN=Gxylt2 PE=2 SV=1	6e-62
KH.C7.439.v1.A.ND1-1	701	200	1021	336	864	221	5.28789	1.94638	7.58816	2.5317	6.52249	2.06907	0.368084	0.333638	0.317221	A8E0R9	sp|A8E0R9|GRIP2_XENLA Glutamate receptor-interacting protein 2 OS=Xenopus laevis GN=grip2 PE=2 SV=2	1e-98
KH.L53.1.v1.A.ND2-1	367	113	416	81	340	87	4.95716	1.96915	5.53613	1.09285	4.59601	1.45849	0.397234	0.197403	0.317339	O54714	sp|O54714|PIAS3_MOUSE E3 SUMO-protein ligase PIAS3 OS=Mus musculus GN=Pias3 PE=1 SV=3	2e-37
KH.C14.11.v1.A.ND1-1	1830	301	1728	320	1398	358	52.3954	11.1184	48.7453	9.15169	40.0576	12.7217	0.212202	0.187745	0.317584	Q5I0K7	sp|Q5I0K7|ALG13_RAT UDP-N-acetylglucosamine transferase subunit ALG13 homolog OS=Rattus norvegicus GN=Alg13 PE=1 SV=1	9e-24
KH.S521.3.v1.A.nonSL3-1	349	60	449	76	238	61	7.67446	1.70219	9.72782	1.66934	5.23763	1.66484	0.221799	0.171605	0.31786	Q71ZE8	sp|Q71ZE8|DTD_LISMF D-tyrosyl-tRNA(Tyr) deacylase OS=Listeria monocytogenes serotype 4b (strain F2365) GN=dtd PE=3 SV=1	3.4
KH.C3.849.v1.C.ND1-1	685	104	820	189	222	57	8.9832	1.75958	10.595	2.47578	2.91359	0.927757	0.195874	0.233674	0.318424	P48441	sp|P48441|IDUA_MOUSE Alpha-L-iduronidase OS=Mus musculus GN=Idua PE=1 SV=2	2e-69
KH.C7.505.v1.A.ND1-1	1905	537	2630	474	1363	351	27.6533	10.0568	37.6145	6.8729	19.8009	6.32381	0.363675	0.18272	0.31937	Q9UGJ1	sp|Q9UGJ1|GCP4_HUMAN Gamma-tubulin complex component 4 OS=Homo sapiens GN=TUBGCP4 PE=1 SV=1	1e-56
KH.C6.17.v1.A.ND1-1	717	252	831	277	625	161	9.09966	4.12611	10.3909	3.51152	7.93819	2.53601	0.453436	0.337941	0.319469	P27674	sp|P27674|GTR1_BOVIN Solute carrier family 2, facilitated glucose transporter member 1 OS=Bos taurus GN=SLC2A1 PE=2 SV=1	0.001
KH.C5.68.v1.B.SL1-1	270	100	296	102	430	111	4.27459	2.04251	4.61709	1.61302	6.81294	2.18108	0.477827	0.349358	0.320138	Q8N3C7	sp|Q8N3C7|CLIP4_HUMAN CAP-Gly domain-containing linker protein 4 OS=Homo sapiens GN=CLIP4 PE=1 SV=1	2e-24
KH.C7.538.v1.A.ND1-1	333	49	283	99	344	89	5.35931	1.01741	4.48743	1.59151	5.54063	1.77776	0.189839	0.354659	0.32086	O97665	sp|O97665|CCR8_MACMU C-C chemokine receptor type 8 OS=Macaca mulatta GN=CCR8 PE=3 SV=1	0.36
KH.L168.4.v2.A.SL3-1	4174	704	6854	1669	2529	655	54.3488	11.8262	87.9282	21.7072	32.9551	10.5852	0.217598	0.246874	0.3212	E7F6T8	sp|E7F6T8|UBP37_DANRE Ubiquitin carboxyl-terminal hydrolase 37 OS=Danio rerio GN=usp37 PE=2 SV=1	9e-20
KH.C2.871.v1.A.SL3-1	739	133	1153	246	594	154	12.4678	2.89489	19.1656	4.14563	10.0293	3.22468	0.232189	0.216306	0.321527	Q8N806	sp|Q8N806|UBR7_HUMAN Putative E3 ubiquitin-protein ligase UBR7 OS=Homo sapiens GN=UBR7 PE=1 SV=2	5e-47
KH.C12.480.v1.A.SL7-1	217	45	246	51	239	62	7.31814	1.95789	8.17378	1.71799	8.0663	2.59509	0.267539	0.210183	0.321719	Q9V727	sp|Q9V727|ASX_DROME Polycomb protein Asx OS=Drosophila melanogaster GN=Asx PE=1 SV=1	0.93
KH.C11.625.v1.A.SL1-1	1642	344	2301	510	2634	684	31.037	8.38878	42.8518	9.62909	49.8262	16.0465	0.270284	0.224707	0.32205	Q78KK3	sp|Q78KK3|S22AI_MOUSE Solute carrier family 22 member 18 OS=Mus musculus GN=Slc22a18 PE=2 SV=2	1e-08
KH.C4.383.v1.A.SL1-1	3249	1232	3389	1293	3909	1017	88.23	43.163	90.6744	35.0731	106.235	34.2773	0.48921	0.386803	0.322655	Q9UBX3	sp|Q9UBX3|DIC_HUMAN Mitochondrial dicarboxylate carrier OS=Homo sapiens GN=SLC25A10 PE=1 SV=2	5e-59
KH.C1.27.v1.A.SL1-1	2881	1097	3587	691	3315	864	58.7801	28.8754	72.1049	14.0823	67.6871	21.8786	0.491245	0.195303	0.323231	Q8C172	sp|Q8C172|CERS6_MOUSE Ceramide synthase 6 OS=Mus musculus GN=Cers6 PE=1 SV=1	2e-46
KH.C1.1041.v1.A.SL1-1	2609	831	2553	746	1302	340	55.45	22.7857	53.4595	15.8371	27.6933	8.96862	0.410924	0.296245	0.323855	Q9GZT8	sp|Q9GZT8|GTPC1_HUMAN Putative GTP cyclohydrolase 1 type 2 NIF3L1 OS=Homo sapiens GN=NIF3L1 PE=1 SV=2	4e-47
KH.S494.7.v1.A.ND1-1	394	120	1065	249	823	215	22.9418	9.0146	61.098	14.4824	47.9586	15.5377	0.392934	0.237035	0.323983	Q9BTY7	sp|Q9BTY7|F203A_HUMAN Protein FAM203A OS=Homo sapiens GN=FAM203A PE=1 SV=1	1e-20
KH.C1.217.v1.A.SL2-1	1725	315	2321	354	998	261	40.944	9.64597	54.2778	8.39292	23.7065	7.68883	0.235589	0.154629	0.324335	Q2TBI1	sp|Q2TBI1|NSE4A_BOVIN Non-structural maintenance of chromosomes element 4 homolog A OS=Bos taurus GN=NSMCE4A PE=2 SV=1	3e-10
KH.C3.83.v1.A.SL1-1	316	95	526	28	325	85	3.47686	1.34852	5.70206	0.307728	3.57865	1.16075	0.387856	0.0539678	0.324354	Q9UIU6	sp|Q9UIU6|SIX4_HUMAN Homeobox protein SIX4 OS=Homo sapiens GN=SIX4 PE=1 SV=2	4e-46
KH.C2.401.v1.A.SL1-1	803	230	900	303	929	243	22.8438	8.44139	25.2256	8.61001	26.4486	8.5798	0.369527	0.341321	0.324395	P60762	sp|P60762|MO4L1_MOUSE Mortality factor 4-like protein 1 OS=Mus musculus GN=Morf4l1 PE=1 SV=2	1e-51
KH.C8.335.v1.A.SL2-1	4705	1787	5434	1802	5700	1491	68.3945	33.5135	77.8265	26.1653	82.9224	26.9003	0.490004	0.3362	0.324404	O94889	sp|O94889|KLH18_HUMAN Kelch-like protein 18 OS=Homo sapiens GN=KLHL18 PE=2 SV=3	2e-84
KH.C9.207.v1.A.ND1-1	620	220	1000	369	776	203	8.92504	4.08578	14.1829	5.30583	11.1793	3.62688	0.457789	0.374101	0.324427	A0JNJ3	sp|A0JNJ3|SPG20_BOVIN Spartin OS=Bos taurus GN=SPG20 PE=2 SV=1	3e-19
KH.C11.638.v1.A.SL3-1	533	94	713	270	374	98	5.74253	1.30659	7.56853	2.90568	4.03258	1.31045	0.227528	0.383916	0.324966	Q9UDY8	sp|Q9UDY8|MALT1_HUMAN Mucosa-associated lymphoid tissue lymphoma translocation protein 1 OS=Homo sapiens GN=MALT1 PE=1 SV=1	2e-12
KH.C1.373.v1.A.SL1-1	3341	843	3548	867	3204	840	53.1376	17.2977	55.5975	13.7738	50.998	16.5815	0.325526	0.247741	0.32514	P25048	sp|P25048|DNRJ_STRPE Daunorubicin biosynthesis sensory transduction protein DnrJ OS=Streptomyces peucetius GN=dnrJ PE=3 SV=1	2.1
KH.L13.2.v3.A.SL1-2	206	34	320	85	324	85	3.11693	0.663703	4.77042	1.28466	4.90615	1.59624	0.212935	0.269297	0.325355	P98163	sp|P98163|YL_DROME Putative vitellogenin receptor OS=Drosophila melanogaster GN=yl PE=1 SV=2	2e-06
KH.C14.292.v1.A.SL3-1	319	87	353	50	179	47	6.10393	2.14769	6.65487	0.955647	3.42773	1.11618	0.351854	0.143601	0.325633	Q708S5	sp|Q708S5|ASIC2_DANRE Acid-sensing ion channel 2 OS=Danio rerio GN=asic2 PE=2 SV=1	1e-08
KH.C1.507.v2.A.ND1-1	267	41	416	106	179	47	2.39113	0.473708	3.67056	0.948216	1.60428	0.522407	0.19811	0.25833	0.325633	Q5GH73	sp|Q5GH73|XKR6_HUMAN XK-related protein 6 OS=Homo sapiens GN=XKR6 PE=2 SV=1	4e-13
KH.C5.418.v2.A.SL2-1	1178	275	1097	345	1179	310	31.0937	9.3647	28.5286	9.09609	31.1441	10.1556	0.301177	0.318842	0.326085	Q63055	sp|Q63055|ARFRP_RAT ADP-ribosylation factor-related protein 1 OS=Rattus norvegicus GN=Arfrp1 PE=2 SV=1	4e-37
KH.C8.368.v1.A.SL1-1	1657	488	1612	425	715	188	56.0634	21.3015	53.7363	14.3633	24.2102	7.89466	0.379955	0.267292	0.326088	Q569B7	sp|Q569B7|RWDD4_RAT RWD domain-containing protein 4 OS=Rattus norvegicus GN=Rwdd4 PE=2 SV=1	5e-25
KH.C13.152.v1.A.SL1-1	755	265	1632	359	1158	305	14.1591	6.41162	30.1546	6.72498	21.7336	7.09915	0.452828	0.223016	0.326644	Q9JI67	sp|Q9JI67|B3GT5_MOUSE Beta-1,3-galactosyltransferase 5 OS=Mus musculus GN=B3galt5 PE=2 SV=1	0.01
KH.C7.318.v3.A.SL1-3	532	151	681	205	485	128	6.21874	2.2772	7.84303	2.39361	5.67372	1.85703	0.366184	0.305189	0.327304	Q96E09	sp|Q96E09|F122A_HUMAN Protein FAM122A OS=Homo sapiens GN=FAM122A PE=1 SV=1	0.006
KH.C1.6.v1.A.SL1-1	2815	927	3298	1122	2242	592	65.0771	27.648	75.1185	25.9091	51.8706	16.986	0.42485	0.344909	0.327468	P36551	sp|P36551|HEM6_HUMAN Coproporphyrinogen-III oxidase, mitochondrial OS=Homo sapiens GN=CPOX PE=1 SV=3	6e-90
KH.C8.886.v1.A.nonSL3-1	711	222	709	222	511	135	11.6848	4.70694	11.48	3.64429	8.40441	2.75362	0.402826	0.317446	0.327639	Q28ES8	sp|Q28ES8|CTU2_XENTR Cytoplasmic tRNA 2-thiolation protein 2 OS=Xenopus tropicalis GN=ctu2 PE=2 SV=1	7e-37
KH.C2.213.v2.A.SL2-1	873	216	1597	503	1293	342	16.1001	5.13928	29.0179	9.26598	23.8643	7.82816	0.319208	0.31932	0.328028	Q9DBW0	sp|Q9DBW0|CP4V2_MOUSE Cytochrome P450 4V2 OS=Mus musculus GN=Cyp4v2 PE=1 SV=1	1e-68
KH.C10.52.v1.A.SL1-1	525	169	384	136	366	97	18.138	7.5327	13.071	4.69329	12.6545	4.1593	0.4153	0.359063	0.328681	Q71R50	sp|Q71R50|DHR11_CHICK Dehydrogenase/reductase SDR family member 11 OS=Gallus gallus GN=DHRS11 PE=2 SV=1	1e-50
KH.C7.573.v1.C.ND1-1	735	168	1219	422	1175	312	28.747	8.47713	46.9737	16.4864	45.9916	15.1453	0.294887	0.350971	0.329306	Q9WVQ1	sp|Q9WVQ1|MAGI2_MOUSE Membrane-associated guanylate kinase, WW and PDZ domain-containing protein 2 OS=Mus musculus GN=Magi2 PE=1 SV=2	5e-28
KH.C7.642.v1.A.ND1-1	911	228	1187	430	523	139	16.2608	5.25041	20.8747	7.66657	9.34246	3.07934	0.322887	0.367266	0.329607	Q9DCL4	sp|Q9DCL4|MET15_MOUSE Probable methyltransferase-like protein 15 OS=Mus musculus GN=Mettl15 PE=2 SV=2	1e-42
KH.C1.765.v1.A.ND1-1	1456	380	1682	419	852	227	19.1589	6.45099	21.8062	5.50721	11.2198	3.70726	0.33671	0.252552	0.330422	Q44115	sp|Q44115|CPCE_SYNE7 Phycocyanobilin lyase subunit alpha OS=Synechococcus elongatus (strain PCC 7942) GN=cpcE PE=3 SV=2	1
KH.C4.692.v1.A.ND1-1	1033	114	1663	241	315	84	11.5414	1.64323	18.3062	2.68958	3.52213	1.16482	0.142377	0.146922	0.330714	Q9P2G4	sp|Q9P2G4|MAP10_HUMAN Microtubule-associated protein 10 OS=Homo sapiens GN=MAP10 PE=1 SV=2	0.099
KH.L170.5.v1.A.SL2-1	1163	228	1260	213	896	239	40.5858	10.2651	43.3223	7.42477	31.2923	10.3517	0.252924	0.171384	0.330806	A5D6V4	sp|A5D6V4|TM17B_DANRE Transmembrane protein 17B OS=Danio rerio GN=Tmem17b PE=2 SV=1	2e-17
KH.L108.35.v1.B.SL2-1	1177	273	1808	677	712	190	9.59551	2.87137	14.5223	5.51301	5.80907	1.92249	0.299241	0.379623	0.330946	Q91YE6	sp|Q91YE6|IPO9_MOUSE Importin-9 OS=Mus musculus GN=Ipo9 PE=1 SV=3	6e-147
KH.L170.11.v2.A.SL2-1	903	254	1142	371	1615	432	25.3408	9.19603	31.5751	10.3996	45.3566	15.0465	0.362894	0.32936	0.331737	Q2TBT5	sp|Q2TBT5|RNH2A_BOVIN Ribonuclease H2 subunit A OS=Bos taurus GN=RNASEH2A PE=1 SV=1	1e-51
KH.S694.2.v1.A.ND1-1	1370	408	1627	524	1936	518	19.2665	7.40249	22.5433	7.36077	27.2473	9.04132	0.384215	0.326517	0.331824	Q96IK5	sp|Q96IK5|GMCL1_HUMAN Germ cell-less protein-like 1 OS=Homo sapiens GN=GMCL1 PE=1 SV=1	2e-41
KH.C2.1106.v1.A.SL2-1	501	169	623	129	612	164	8.7763	3.8194	10.7525	2.25721	10.729	3.56563	0.435194	0.209925	0.332335	Q5ZJR8	sp|Q5ZJR8|ELOV6_CHICK Elongation of very long chain fatty acids protein 6 OS=Gallus gallus GN=ELOVL6 PE=2 SV=1	2e-35
KH.C5.349.v1.A.ND1-1	369	111	245	71	302	81	7.41666	2.87832	4.8517	1.42544	6.07469	2.02062	0.388089	0.293802	0.33263	Q5KR61	sp|Q5KR61|PIGV_RAT GPI mannosyltransferase 2 OS=Rattus norvegicus GN=Pigv PE=2 SV=1	3e-20
KH.C6.296.v1.A.SL1-1	3778	1377	3598	1437	3895	1045	101.531	47.7427	95.2678	38.5749	104.757	34.8557	0.470226	0.40491	0.33273	Q27783	sp|Q27783|DRTS_TRYBB Bifunctional dihydrofolate reductase-thymidylate synthase OS=Trypanosoma brucei brucei PE=1 SV=1	3e-11
KH.C14.109.v1.A.SL1-1	1663	481	1955	563	1543	414	30.8709	11.5196	35.7561	10.4394	28.6654	9.53842	0.373153	0.29196	0.33275	A7MAZ3	sp|A7MAZ3|UBA5_BOVIN Ubiquitin-like modifier-activating enzyme 5 OS=Bos taurus GN=UBA5 PE=2 SV=1	2e-105
KH.C8.780.v1.A.SL1-1	1318	341	2115	647	1337	361	13.3316	4.44997	21.0778	6.53704	13.5343	4.53205	0.33379	0.310139	0.334857	Q7TPS5	sp|Q7TPS5|C2CD5_MOUSE C2 domain-containing protein 5 OS=Mus musculus GN=C2cd5 PE=1 SV=2	5e-71
KH.C9.824.v1.A.ND1-1	1068	241	1108	435	1185	320	22.5292	6.55882	23.0282	9.16585	25.0166	8.37806	0.291125	0.398026	0.3349	Q9Y2X8	sp|Q9Y2X8|UB2D4_HUMAN Ubiquitin-conjugating enzyme E2 D4 OS=Homo sapiens GN=UBE2D4 PE=1 SV=1	4e-37
KH.C2.920.v1.A.nonSL2-1	254	46	250	62	196	53	4.80986	1.12381	4.66429	1.17273	3.71442	1.24564	0.233646	0.251428	0.335354	Q5QJU3	sp|Q5QJU3|ACER2_HUMAN Alkaline ceramidase 2 OS=Homo sapiens GN=ACER2 PE=1 SV=2	1e-11
KH.C1.79.v1.A.nonSL2-1	726	159	1105	191	281	76	29.8993	8.44805	44.8367	7.85719	11.5816	3.8847	0.28255	0.17524	0.335421	Q63ZL2	sp|Q63ZL2|HOP2_XENLA Homologous-pairing protein 2 homolog OS=Xenopus laevis GN=psmc3ip PE=2 SV=1	2e-27
KH.C2.194.v1.A.SL5-1	531	118	445	124	507	138	12.5081	3.58604	10.3277	2.91762	11.952	4.03456	0.286696	0.282504	0.337563	Q8IZQ1	sp|Q8IZQ1|WDFY3_HUMAN WD repeat and FYVE domain-containing protein 3 OS=Homo sapiens GN=WDFY3 PE=1 SV=2	2.5
KH.C2.840.v1.A.SL2-1	190	53	319	75	169	46	3.10773	1.11841	5.14076	1.22535	2.76638	0.933827	0.359879	0.23836	0.337563	B5X3B2	sp|B5X3B2|APMAP_SALSA Adipocyte plasma membrane-associated protein OS=Salmo salar GN=apmap PE=2 SV=1	0.0003
KH.C1.818.v2.A.ND2-1	461	134	667	186	532	145	6.18119	2.31798	8.81137	2.49111	7.13869	2.413	0.375006	0.282715	0.338018	Q5DU56	sp|Q5DU56|NLRC3_MOUSE Protein NLRC3 OS=Mus musculus GN=Nlrc3 PE=2 SV=2	1e-22
KH.C8.485.v1.A.SL1-1	905	272	517	211	663	181	17.4348	6.76039	9.81308	4.06032	12.7826	4.32779	0.387753	0.413766	0.33857	Q922Q5	sp|Q922Q5|S35B3_MOUSE Adenosine 3'-phospho 5'-phosphosulfate transporter 2 OS=Mus musculus GN=Slc35b3 PE=2 SV=1	5e-35
KH.C2.608.v1.A.SL1-1	803	266	588	196	747	204	35.117	15.0079	25.3353	8.56185	32.6933	11.0726	0.427367	0.337941	0.338683	Q08CN0	sp|Q08CN0|TPPC2_DANRE Trafficking protein particle complex subunit 2 OS=Danio rerio GN=trappc2 PE=2 SV=1	2e-37
KH.L90.10.v1.A.ND1-1	836	267	889	305	569	156	15.3268	6.31527	16.0581	5.58541	10.4398	3.54968	0.41204	0.347825	0.340013	Q9NSD5	sp|Q9NSD5|S6A13_HUMAN Sodium- and chloride-dependent GABA transporter 2 OS=Homo sapiens GN=SLC6A13 PE=1 SV=3	3e-22
KH.C14.550.v1.B.ND1-1	3023	614	4152	1084	5087	1395	43.6582	11.4401	59.0788	15.6375	73.5233	25.0047	0.262038	0.264688	0.340092	Q4JIM4	sp|Q4JIM4|PSN1_CHICK Presenilin-1 OS=Gallus gallus GN=PSEN1 PE=1 SV=1	9e-81
KH.C1.703.v1.A.SL1-1	1976	633	2101	618	2275	624	55.9573	23.1264	58.6195	17.481	64.4743	21.9317	0.413286	0.298212	0.340163	Q8CFV9	sp|Q8CFV9|RIFK_MOUSE Riboflavin kinase OS=Mus musculus GN=Rfk PE=1 SV=2	7e-39
KH.C11.84.v1.A.SL3-1	467	167	585	182	597	164	5.97562	2.75687	7.3751	2.32619	7.64497	2.60452	0.461354	0.315412	0.340685	Q62862	sp|Q62862|MP2K5_RAT Dual specificity mitogen-activated protein kinase kinase 5 OS=Rattus norvegicus GN=Map2k5 PE=1 SV=1	2e-50
KH.C6.293.v1.A.SL2-1	362	68	484	96	302	83	5.32194	1.28975	7.01057	1.40975	4.44328	1.51446	0.242345	0.201089	0.340843	Q86WU2	sp|Q86WU2|LDHD_HUMAN Probable D-lactate dehydrogenase, mitochondrial OS=Homo sapiens GN=LDHD PE=1 SV=1	6e-96
KH.L4.52.v1.A.SL1-1	838	108	1004	225	542	149	18.7188	3.11237	22.096	5.02024	12.1162	4.13084	0.16627	0.227202	0.340934	Q99M03	sp|Q99M03|RWD2B_MOUSE RWD domain-containing protein 2B OS=Mus musculus GN=Rwdd2b PE=2 SV=1	6e-27
KH.S665.6.v2.A.SL2-1	1645	318	2287	763	1218	335	27.0344	6.74237	37.0308	12.5252	20.0324	6.83305	0.2494	0.338237	0.341099	Q8IYB1	sp|Q8IYB1|M21D2_HUMAN Protein MB21D2 OS=Homo sapiens GN=MB21D2 PE=1 SV=3	6e-87
KH.L151.6.v1.A.SL1-1	2191	606	3009	1039	2737	753	15.5044	5.53247	20.9788	7.34406	19.3831	6.61342	0.356833	0.350071	0.341196	Q8N0W3	sp|Q8N0W3|FUK_HUMAN L-fucose kinase OS=Homo sapiens GN=FUK PE=2 SV=2	5e-66
KH.C12.44.v1.A.SL1-1	606	154	583	171	512	141	14.5056	4.75574	13.7492	4.08854	12.265	4.18891	0.327856	0.297365	0.341533	P60899	sp|P60899|RPB9_PIG DNA-directed RNA polymerase II subunit RPB9 OS=Sus scrofa GN=POLR2I PE=3 SV=1	3e-45
KH.L149.26.v1.A.SL3-1	470	62	432	98	116	32	10.0028	1.70235	9.05841	2.08332	2.47067	0.845261	0.170188	0.229988	0.342118	Q86XU0	sp|Q86XU0|ZN677_HUMAN Zinc finger protein 677 OS=Homo sapiens GN=ZNF677 PE=2 SV=1	6e-46
KH.C4.561.v1.A.SL1-1	618	144	675	93	703	194	22.5804	6.78796	24.2992	3.39418	25.7059	8.79758	0.300613	0.139682	0.342239	P28468	sp|P28468|HOX1_HALRO Homeobox protein AHox1 OS=Halocynthia roretzi GN=AHOX1 PE=2 SV=1	1.3
KH.C7.601.v1.B.SL1-1	978	215	924	197	764	211	15.8631	4.49907	14.7662	3.19172	12.4016	4.24767	0.283618	0.216151	0.342509	Q6ICH7	sp|Q6ICH7|ASPH2_HUMAN Aspartate beta-hydroxylase domain-containing protein 2 OS=Homo sapiens GN=ASPHD2 PE=2 SV=1	2e-05
KH.C2.350.v1.A.ND1-1	4684	1353	7071	2714	4766	1317	33.9811	12.6635	50.5414	19.667	34.6027	11.8584	0.372662	0.389127	0.342701	P12255	sp|P12255|FHAB_BORPE Filamentous hemagglutinin OS=Bordetella pertussis (strain Tohama I / ATCC BAA-589 / NCTC 13251) GN=fhaB PE=1 SV=4	0.019
KH.C7.160.v1.C.ND2-1	784	187	1033	315	893	247	14.6323	4.5027	18.9952	5.87241	16.6795	5.72154	0.307723	0.309152	0.343027	Q8N4B1	sp|Q8N4B1|SESQ1_HUMAN Sesquipedalian-1 OS=Homo sapiens GN=FAM109A PE=1 SV=1	0.0002
KH.C10.176.v1.A.SL2-1	460	147	433	133	282	78	16.5929	6.84095	15.3886	4.79209	10.18	3.49203	0.412282	0.311405	0.343027	Q1ATH8	sp|Q1ATH8|PDXH_RUBXD Pyridoxine/pyridoxamine 5'-phosphate oxidase OS=Rubrobacter xylanophilus (strain DSM 9941 / NBRC 16129) GN=pdxH PE=3 SV=2	5e-25
KH.L37.51.v2.A.SL1-1	1442	524	1665	366	1845	511	30.6474	14.3679	34.8649	7.76994	39.2428	13.4793	0.468814	0.222859	0.343485	Q1JQ93	sp|Q1JQ93|DPM1_BOVIN Dolichol-phosphate mannosyltransferase OS=Bos taurus GN=DPM1 PE=2 SV=1	5e-40
KH.C2.554.v1.A.ND2-1	398	133	328	117	367	102	10.177	4.38757	8.2634	2.98836	9.39161	3.23711	0.431125	0.361638	0.344681	Q0P4J9	sp|Q0P4J9|PORED_XENTR Polyprenol reductase OS=Xenopus tropicalis GN=srd5a3 PE=2 SV=1	7e-10
KH.C2.282.v2.A.ND1-1	1163	257	1419	444	669	186	18.8638	5.37796	22.6766	7.19353	10.8595	3.7444	0.285094	0.317222	0.344802	Q5M7D1	sp|Q5M7D1|DJ27B_XENLA DnaJ homolog subfamily C member 27-B OS=Xenopus laevis GN=dnajc27-b PE=2 SV=1	4e-75
KH.C7.554.v1.A.ND1-1	1270	148	1423	272	1035	288	18.583	2.79389	20.5147	3.97549	15.1562	5.23027	0.150346	0.193788	0.345092	Q1LZA4	sp|Q1LZA4|PIGW_BOVIN Phosphatidylinositol-glycan biosynthesis class W protein OS=Bos taurus GN=PIGW PE=2 SV=1	5e-16
KH.C4.529.v1.A.SL1-1	893	322	1099	261	650	181	44.4266	20.6672	53.8687	12.97	32.3624	11.1761	0.465199	0.240772	0.345341	Q9BYC9	sp|Q9BYC9|RM20_HUMAN 39S ribosomal protein L20, mitochondrial OS=Homo sapiens GN=MRPL20 PE=1 SV=1	0.018
KH.S346.11.v1.A.nonSL6-1	322	106	363	92	416	116	11.1123	4.71941	12.3424	3.17135	14.3673	4.96849	0.424702	0.256947	0.345818	Q68EL3	sp|Q68EL3|BET1L_DANRE BET1-like protein OS=Danio rerio GN=bet1l PE=3 SV=1	2e-18
KH.C11.109.v1.R.ND2-1	386	130	464	154	405	113	4.84936	2.10705	5.7433	1.93253	5.09199	1.76195	0.434501	0.336485	0.346024	Q8C015	sp|Q8C015|PAK7_MOUSE Serine/threonine-protein kinase PAK 7 OS=Mus musculus GN=Pak7 PE=1 SV=1	7e-92
KH.C1.138.v1.A.nonSL2-1	759	158	850	232	612	171	19.2969	5.18247	21.2917	5.89173	15.5716	5.39586	0.268565	0.276714	0.34652	A4IFM1	sp|A4IFM1|F155A_BOVIN Transmembrane protein FAM155A OS=Bos taurus GN=FAM155A PE=2 SV=1	0.12
KH.C1.237.v1.A.nonSL6-1	673	233	614	196	690	193	19.2158	8.58291	17.2727	5.58997	19.7165	6.83944	0.446658	0.323631	0.34689	A2AE42	sp|A2AE42|C56D1_MOUSE Cytochrome b561 domain-containing protein 1 OS=Mus musculus GN=Cyb561d1 PE=2 SV=1	1e-15
KH.C6.165.v1.A.SL1-1	5007	1662	6914	1796	4879	1366	55.9418	23.9566	76.1088	20.0435	54.5538	18.9421	0.428241	0.263354	0.347219	Q6DHR3	sp|Q6DHR3|RG1BA_DANRE Ras-GEF domain-containing family member 1B-A OS=Danio rerio GN=rasgef1ba PE=2 SV=2	2e-14
KH.C12.271.v1.A.SL3-1	649	246	824	239	585	164	20.1596	9.85842	25.2181	7.41557	18.1857	6.32267	0.489018	0.294058	0.347673	Q66KB9	sp|Q66KB9|BL1S2_XENTR Biogenesis of lysosome-related organelles complex 1 subunit 2 OS=Xenopus tropicalis GN=bloc1s2 PE=2 SV=1	4e-20
KH.L18.123.v1.R.ND1-1	299	91	371	138	107	30	4.59338	1.80359	5.61542	2.11763	1.64506	0.572007	0.392649	0.37711	0.347713	Q9NVH0	sp|Q9NVH0|EXD2_HUMAN Exonuclease 3'-5' domain-containing protein 2 OS=Homo sapiens GN=EXD2 PE=1 SV=2	2e-71
KH.C10.357.v2.A.SL1-1	780	226	831	199	838	235	42.3265	15.822	44.4288	10.7865	45.509	15.8272	0.373808	0.242781	0.347782	Q6P0D1	sp|Q6P0D1|ZNT6_DANRE Zinc transporter 6 OS=Danio rerio GN=slc30a6 PE=2 SV=1	5e-09
KH.C4.753.v1.A.SL1-1	1192	327	1717	522	1678	472	24.8916	8.80967	35.326	10.8882	35.0675	12.2331	0.353921	0.308221	0.348846	Q9H299	sp|Q9H299|SH3L3_HUMAN SH3 domain-binding glutamic acid-rich-like protein 3 OS=Homo sapiens GN=SH3BGRL3 PE=1 SV=1	0.001
KH.L154.36.v1.R.ND1-1	295	35	318	80	231	65	4.19416	0.641986	4.45448	1.13611	3.28678	1.14698	0.153067	0.25505	0.348967	Q6NT55	sp|Q6NT55|CP4FN_HUMAN Cytochrome P450 4F22 OS=Homo sapiens GN=CYP4F22 PE=2 SV=1	1e-40
KH.L144.17.v1.A.ND1-1	1658	197	2116	286	1002	282	20.0675	3.07616	25.2331	3.45766	12.137	4.23619	0.153291	0.137029	0.349032	A2AWP0	sp|A2AWP0|BIRC7_MOUSE Baculoviral IAP repeat-containing protein 7 OS=Mus musculus GN=Birc7 PE=2 SV=1	2e-09
KH.C2.431.v2.R.ND2-1	185	71	272	94	238	67	2.05294	1.01647	2.97385	1.04194	2.64312	0.922779	0.495132	0.350366	0.349125	Q8HYL8	sp|Q8HYL8|ACOX1_PHACI Peroxisomal acyl-coenzyme A oxidase 1 OS=Phascolarctos cinereus GN=ACOX1 PE=1 SV=2	1e-72
KH.S966.2.v2.A.SL3-1	141	51	159	64	103	29	2.60036	1.21344	2.88907	1.17897	1.90102	0.663791	0.466644	0.40808	0.349176	Q149F1	sp|Q149F1|RUSD2_MOUSE RNA pseudouridylate synthase domain-containing protein 2 OS=Mus musculus GN=Rpusd2 PE=2 SV=2	1e-55
KH.C4.453.v1.A.SL1-1	1880	443	2409	537	1703	480	27.2142	8.27325	34.3575	7.76463	24.6711	8.62378	0.304005	0.225996	0.349551	Q5FYB1	sp|Q5FYB1|ARSI_HUMAN Arylsulfatase I OS=Homo sapiens GN=ARSI PE=1 SV=1	1e-65
KH.L131.6.v2.A.SL1-2	646	132	734	249	741	209	26.4644	6.97652	29.626	10.1892	30.3797	10.6266	0.263618	0.343927	0.349793	Q99447	sp|Q99447|PCY2_HUMAN Ethanolamine-phosphate cytidylyltransferase OS=Homo sapiens GN=PCYT2 PE=1 SV=1	1e-43
KH.C11.678.v2.A.SL3-1	1191	326	1231	247	867	245	22.1222	7.81211	22.5279	4.58271	16.1165	5.64809	0.353135	0.203424	0.350453	P07898	sp|P07898|PGCA_CHICK Aggrecan core protein OS=Gallus gallus GN=ACAN PE=1 SV=2	0.094
KH.C14.615.v1.A.nonSL5-1	193	55	173	49	113	32	7.24768	2.66464	6.4008	1.83801	4.24674	1.49146	0.367654	0.287152	0.3512	Q9NRH1	sp|Q9NRH1|YAED1_HUMAN Yae1 domain-containing protein 1 OS=Homo sapiens GN=YAE1D1 PE=1 SV=1	6e-05
KH.C2.815.v1.A.ND1-1	958	258	1365	388	1059	300	19.4057	6.74245	27.2422	7.85063	21.4682	7.5423	0.347447	0.288178	0.351325	Q86WC4	sp|Q86WC4|OSTM1_HUMAN Osteopetrosis-associated transmembrane protein 1 OS=Homo sapiens GN=OSTM1 PE=1 SV=1	0.0003
KH.C8.180.v1.A.ND2-1	1037	391	948	274	1730	491	18.4463	8.97309	16.6144	4.86844	30.7973	10.84	0.486443	0.293025	0.351981	Q9H0R3	sp|Q9H0R3|TM222_HUMAN Transmembrane protein 222 OS=Homo sapiens GN=TMEM222 PE=1 SV=2	9e-47
KH.C8.242.v3.A.SL3-1	506	172	552	196	401	114	10.6092	4.65258	11.4029	4.10484	8.41416	2.96657	0.438543	0.359981	0.352569	Q6AXU8	sp|Q6AXU8|METL6_RAT Methyltransferase-like protein 6 OS=Rattus norvegicus GN=Mettl6 PE=2 SV=1	5e-59
KH.C14.571.v1.A.SL1-1	1805	372	2183	579	1799	512	24.2437	6.44612	28.8883	7.76799	24.1817	8.53512	0.265889	0.268898	0.352957	Q9W5D4	sp|Q9W5D4|POMT2_DROME Protein O-mannosyl-transferase 2 OS=Drosophila melanogaster GN=tw PE=2 SV=1	7e-47
KH.C10.19.v3.A.SL1-1	980	202	2106	910	1205	343	2.20061	0.585197	4.65931	2.04111	2.70794	0.955937	0.265925	0.438072	0.353013	P23098	sp|P23098|DYHC_TRIGR Dynein beta chain, ciliary OS=Tripneustes gratilla PE=1 SV=1	0
KH.C7.305.v1.A.ND1-1	706	261	835	228	456	130	8.54501	4.07552	9.95728	2.75646	5.52342	1.95286	0.476947	0.276829	0.353559	Q8AYS7	sp|Q8AYS7|CENPI_CHICK Centromere protein I OS=Gallus gallus GN=CENPI PE=1 SV=1	9e-16
KH.C5.14.v1.A.nonSL4-2	214	62	243	82	238	68	5.32324	1.9897	5.95545	2.03744	5.92481	2.09937	0.373777	0.342113	0.354336	Q8CD26	sp|Q8CD26|S35E1_MOUSE Solute carrier family 35 member E1 OS=Mus musculus GN=Slc35e1 PE=2 SV=2	6e-31
KH.C8.462.v1.B.SL1-1	1567	225	1983	573	1093	313	20.9655	3.88376	26.14	7.65772	14.635	5.19756	0.185246	0.292951	0.355146	P14606	sp|P14606|CIGA_DICDI Cyclic AMP-inducible protein BP74 OS=Dictyostelium discoideum GN=cigA PE=2 SV=2	0.21
KH.C6.100.v1.A.SL2-2	368	107	581	203	387	111	8.63583	3.23947	13.4332	4.7584	9.08872	3.23294	0.37512	0.354228	0.355709	Q5ZK69	sp|Q5ZK69|PAAF1_CHICK Proteasomal ATPase-associated factor 1 OS=Gallus gallus GN=PAAF1 PE=2 SV=1	2e-33
KH.C6.39.v1.A.nonSL3-1	1276	462	1341	297	888	255	37.0108	17.2884	38.3224	8.60484	25.7766	9.17986	0.467117	0.224538	0.356132	Q9W1Y1	sp|Q9W1Y1|EMC89_DROME ER membrane protein complex subunit 8/9 homolog OS=Drosophila melanogaster GN=CG3501 PE=1 SV=1	3e-13
KH.C1.482.v1.A.ND2-1	861	142	977	315	1142	328	19.2463	4.09513	21.5172	7.03339	25.5474	9.09992	0.212775	0.326873	0.356198	Q9FWW3	sp|Q9FWW3|GSXL6_ARATH Flavin-containing monooxygenase FMO GS-OX-like 6 OS=Arabidopsis thaliana GN=At1g12130 PE=2 SV=1	2e-18
KH.C8.431.v3.A.ND2-1	264	94	444	137	389	112	4.68001	2.14983	7.75482	2.42589	6.90125	2.46422	0.459365	0.312824	0.357069	Q7ZY86	sp|Q7ZY86|TM168_XENLA Transmembrane protein 168 OS=Xenopus laevis GN=tmem168 PE=2 SV=1	9e-17
KH.C12.88.v1.A.SL1-2	1228	365	923	183	738	213	39.042	14.9713	28.9122	5.81157	23.4815	8.40488	0.383468	0.201007	0.357937	Q6P3W2	sp|Q6P3W2|DJC24_HUMAN DnaJ homolog subfamily C member 24 OS=Homo sapiens GN=DNAJC24 PE=1 SV=1	3e-05
KH.C4.524.v1.R.ND1-1	532	119	278	45	135	39	20.0022	5.77229	10.2981	1.69	5.07967	1.81991	0.288582	0.164108	0.358273	Q9SDN0	sp|Q9SDN0|DNJ20_ARATH Chaperone protein dnaJ 20, chloroplastic OS=Arabidopsis thaliana GN=ATJ20 PE=2 SV=2	2e-06
KH.C4.792.v2.A.SL2-1	400	103	497	189	346	100	19.8682	6.60039	24.3221	9.3771	17.1992	6.16477	0.332209	0.385539	0.358432	Q5BJQ2	sp|Q5BJQ2|FA63A_RAT Protein FAM63A OS=Rattus norvegicus GN=Fam63a PE=2 SV=1	3e-07
KH.C1.1213.v1.A.SL1-1	3930	885	5272	1549	3140	909	47.4372	13.7817	62.6972	18.6761	37.9307	13.6179	0.290526	0.297878	0.359019	Q9P2Y5	sp|Q9P2Y5|UVRAG_HUMAN UV radiation resistance-associated gene protein OS=Homo sapiens GN=UVRAG PE=1 SV=1	8e-20
KH.C1.225.v1.A.SL1-1	254	67	319	66	321	93	3.76983	1.28291	4.66472	0.978455	4.76792	1.71313	0.340311	0.209757	0.359303	Q58715	sp|Q58715|Y1319_METJA Uncharacterized sodium-dependent transporter MJ1319 OS=Methanocaldococcus jannaschii (strain ATCC 43067 / DSM 2661 / JAL-1 / JCM 10045 / NBRC 100440) GN=MJ1319 PE=3 SV=1	0.006
KH.C4.484.v1.A.SL1-1	1858	417	1685	425	882	256	67.9671	19.6799	60.7295	15.5293	32.2892	11.6228	0.289551	0.255712	0.35996	Q9CQW7	sp|Q9CQW7|APOP1_MOUSE Apoptogenic protein 1, mitochondrial OS=Mus musculus GN=Apopt1 PE=1 SV=1	9e-06
KH.C9.529.v1.A.SL3-1	781	267	910	368	1351	393	25.3488	11.1803	29.1001	11.9306	43.8831	15.8313	0.441057	0.409986	0.360762	Q9QXK8	sp|Q9QXK8|NMU_MOUSE Neuromedin-U OS=Mus musculus GN=Nmu PE=2 SV=1	0.16
KH.C7.621.v1.A.SL1-1	161	58	134	47	213	62	3.96993	1.8451	3.25543	1.15761	5.2562	1.89744	0.464768	0.355595	0.36099	Q8D228	sp|Q8D228|HTPG_WIGBR Chaperone protein HtpG OS=Wigglesworthia glossinidia brevipalpis GN=htpG PE=3 SV=1	0.16
KH.S638.5.v1.A.SL1-1	1371	467	2203	918	2609	760	9.90001	4.3506	15.6732	6.6214	18.8542	6.81131	0.439454	0.422465	0.361262	Q80U28	sp|Q80U28|MADD_MOUSE MAP kinase-activating death domain protein OS=Mus musculus GN=Madd PE=1 SV=2	4e-81
KH.L23.10.v1.A.SL2-1	3140	799	3004	1037	2705	789	48.5984	15.9541	45.8077	16.0317	41.8982	15.1561	0.328285	0.349978	0.361737	Q8CC84	sp|Q8CC84|LYSM4_MOUSE LysM and putative peptidoglycan-binding domain-containing protein 4 OS=Mus musculus GN=Lysmd4 PE=2 SV=1	1e-10
KH.C12.291.v2.A.SL1-1	829	181	987	248	1073	313	22.4145	6.31375	26.2929	6.69784	29.0342	10.5036	0.281682	0.25474	0.361766	Q5XHM7	sp|Q5XHM7|CHSTC_XENLA Carbohydrate sulfotransferase 12 OS=Xenopus laevis GN=chst12 PE=2 SV=2	4e-07
KH.L153.59.v2.A.SL1-1	1066	370	1905	605	1459	426	10.1178	4.53069	17.8143	5.73578	13.8586	5.0183	0.447795	0.321976	0.362108	O54916	sp|O54916|REPS1_MOUSE RalBP1-associated Eps domain-containing protein 1 OS=Mus musculus GN=Reps1 PE=1 SV=2	3e-30
KH.C9.481.v2.A.ND1-1	303	100	393	132	226	66	7.54314	3.21177	9.63937	3.28241	5.63059	2.03926	0.425786	0.340521	0.362175	Q5RF97	sp|Q5RF97|BCD1_PONAB Box C/D snoRNA protein 1 OS=Pongo abelii GN=ZNHIT6 PE=2 SV=1	2e-14
KH.L152.49.v1.A.ND1-1	465	89	631	237	736	215	9.74953	2.40744	13.0349	4.9635	15.4434	5.59485	0.246929	0.380786	0.36228	P70059	sp|P70059|TRY2_XENLA Trypsin OS=Xenopus laevis PE=2 SV=1	0.88
KH.L65.15.v1.R.ND2-1	203	76	224	54	256	75	5.36736	2.59246	5.83525	1.42616	6.77392	2.46119	0.483005	0.244404	0.363333	Q6IV82	sp|Q6IV82|TAZ_PONPY Tafazzin OS=Pongo pygmaeus GN=TAZ PE=3 SV=1	4e-40
KH.C12.385.v1.A.SL1-1	645	205	648	181	215	63	15.6195	6.40465	15.4607	4.37819	5.21052	1.8935	0.410042	0.283182	0.3634	Q8N567	sp|Q8N567|ZCHC9_HUMAN Zinc finger CCHC domain-containing protein 9 OS=Homo sapiens GN=ZCCHC9 PE=2 SV=2	3e-24
KH.C2.1080.v1.A.SL1-1	2347	363	2639	435	2159	633	61.4801	12.2677	68.1094	11.382	56.5991	20.5799	0.199539	0.167114	0.363609	Q1RMQ3	sp|Q1RMQ3|SYS1_BOVIN Protein SYS1 homolog OS=Bos taurus GN=SYS1 PE=2 SV=1	3e-23
KH.C1.773.v2.A.ND2-1	375	123	405	57	184	54	3.96199	1.67657	4.21583	0.601541	1.94552	0.7081	0.423164	0.142686	0.363965	O08848	sp|O08848|RO60_MOUSE 60 kDa SS-A/Ro ribonucleoprotein OS=Mus musculus GN=Trove2 PE=1 SV=1	2e-24
KH.C9.528.v1.A.nonSL9-1	106	38	121	36	143	42	2.68836	1.24337	3.02352	0.911996	3.62955	1.32206	0.4625	0.301634	0.364248	Q66II5	sp|Q66II5|T3HPD_XENTR Trans-L-3-hydroxyproline dehydratase OS=Xenopus tropicalis GN=l3hypdh PE=2 SV=1	1e-57
KH.C11.702.v1.A.SL1-1	362	131	437	161	238	70	5.38045	2.51198	6.39939	2.39026	3.54016	1.2913	0.466871	0.373514	0.364758	Q1RM03	sp|Q1RM03|TCHP_DANRE Trichoplein keratin filament-binding protein OS=Danio rerio GN=tchp PE=2 SV=1	1e-09
KH.C7.114.v1.A.ND1-1	279	36	254	35	204	60	6.8524	1.14071	6.14637	0.858648	5.01423	1.82898	0.166469	0.1397	0.364758	Q8DIP7	sp|Q8DIP7|FUMC_THEEB Fumarate hydratase class II OS=Thermosynechococcus elongatus (strain BP-1) GN=fumC PE=3 SV=1	2.3
KH.C3.208.v1.C.SL1-1	887	152	1124	214	839	247	14.9082	3.29593	18.6129	3.59272	14.1123	5.15248	0.221082	0.193023	0.365105	Q3U145	sp|Q3U145|TMM64_MOUSE Transmembrane protein 64 OS=Mus musculus GN=Tmem64 PE=2 SV=1	9e-18
KH.C9.848.v1.A.SL1-1	3174	1069	4225	1692	4660	1373	64.7156	28.1199	84.8741	34.4597	95.0875	34.7449	0.434515	0.406009	0.3654	Q64337	sp|Q64337|SQSTM_MOUSE Sequestosome-1 OS=Mus musculus GN=Sqstm1 PE=1 SV=1	2e-08
KH.C7.333.v1.A.SL1-1	2181	636	2968	1121	3292	970	33.2591	12.5126	44.5928	17.0753	50.2401	18.3588	0.376215	0.382917	0.365422	P35352	sp|P35352|CAR3_DICDI Cyclic AMP receptor 3 OS=Dictyostelium discoideum GN=carC PE=2 SV=1	0.017
KH.C12.588.v1.A.SL1-1	3056	570	2971	1007	2843	839	59.3148	14.2731	56.8144	19.5231	55.2232	20.2111	0.240633	0.343629	0.365989	Q08C93	sp|Q08C93|ABD12_DANRE Monoacylglycerol lipase ABHD12 OS=Danio rerio GN=abhd12 PE=2 SV=1	1e-23
KH.S1642.1.v1.A.SL1-1	461	173	466	143	569	168	11.3944	5.51661	11.3481	3.5305	14.0747	5.1537	0.48415	0.311109	0.366168	Q6DIY8	sp|Q6DIY8|M17L2_XENTR Mpv17-like protein 2 OS=Xenopus tropicalis GN=mpv17l2 PE=2 SV=1	2e-05
KH.L153.67.v1.A.nonSL4-1	286	97	491	148	281	83	3.89352	1.70366	6.58573	2.01255	3.8284	1.4024	0.437562	0.305592	0.366315	A8MTY0	sp|A8MTY0|ZN724_HUMAN Putative zinc finger protein 724 OS=Homo sapiens GN=ZNF724P PE=5 SV=3	8e-46
KH.C8.410.v3.A.SL1-2	1269	361	2194	748	1851	547	12.7079	4.66393	21.6468	7.48206	18.5504	6.79855	0.367012	0.345643	0.366492	Q92619	sp|Q92619|HMHA1_HUMAN Minor histocompatibility protein HA-1 OS=Homo sapiens GN=HMHA1 PE=1 SV=2	1e-17
KH.L38.9.v1.A.SL1-1	1334	492	945	232	1049	310	40.3885	19.2177	28.189	7.01614	31.7843	11.6488	0.475821	0.248896	0.366496	Q71N41	sp|Q71N41|GAMT_DANRE Guanidinoacetate N-methyltransferase OS=Danio rerio GN=gamt PE=2 SV=2	2e-78
KH.C5.587.v1.A.SL1-1	4460	1353	4779	943	4509	1333	126.646	49.5667	133.703	26.7472	128.137	46.9793	0.391379	0.200049	0.366634	Q5F359	sp|Q5F359|TPPC5_CHICK Trafficking protein particle complex subunit 5 OS=Gallus gallus GN=TRAPPC5 PE=2 SV=1	5e-50
KH.L43.2.v1.A.ND1-1	594	135	837	308	460	136	18.0544	5.29376	25.065	9.35096	13.9923	5.13043	0.293212	0.373068	0.366661	Q8BY02	sp|Q8BY02|NKRF_MOUSE NF-kappa-B-repressing factor OS=Mus musculus GN=Nkrf PE=2 SV=3	0.25
KH.C10.430.v1.A.SL1-1	2332	645	2799	1217	3029	896	32.589	11.6288	38.5382	16.988	42.362	15.5406	0.356833	0.440809	0.366853	Q04791	sp|Q04791|SASB_ANAPL Fatty acyl-CoA hydrolase precursor, medium chain OS=Anas platyrhynchos PE=1 SV=1	4e-24
KH.L170.20.v2.A.SL1-1	305	110	419	76	304	90	5.96826	2.777	8.07809	1.48549	5.95329	2.1858	0.465294	0.183892	0.367157	Q9WU00	sp|Q9WU00|NRF1_MOUSE Nuclear respiratory factor 1 OS=Mus musculus GN=Nrf1 PE=2 SV=2	4e-45
KH.C7.85.v1.R.ND1-1	326	113	568	134	489	145	4.80632	2.14936	8.25069	1.97337	7.21506	2.65328	0.447193	0.239177	0.367741	Q16960	sp|Q16960|DYI3_HELCR Dynein intermediate chain 3, ciliary OS=Heliocidaris crassispina PE=2 SV=1	0
KH.C14.606.v1.B.ND1-1	327	94	382	76	435	129	4.47913	1.66115	5.15532	1.03985	5.96308	2.19308	0.370864	0.201703	0.367776	Q5U374	sp|Q5U374|KLH12_DANRE Kelch-like protein 12 OS=Danio rerio GN=klhl12 PE=2 SV=2	5e-09
KH.C1.322.v1.A.SL1-1	1441	472	1221	475	1422	423	24.2064	10.2292	20.2082	7.97018	23.9057	8.81911	0.422583	0.394403	0.368913	P0A5L8	sp|P0A5L8|NAT_MYCTU Arylamine N-acetyltransferase OS=Mycobacterium tuberculosis GN=nat PE=1 SV=1	2e-05
KH.C2.384.v1.A.SL1-1	1330	344	1429	506	1388	413	21.7541	7.2591	23.0287	8.26703	22.7203	8.38415	0.333688	0.358989	0.369015	Q497B2	sp|Q497B2|TM45B_RAT Transmembrane protein 45B OS=Rattus norvegicus GN=Tmem45b PE=2 SV=1	4e-19
KH.C11.102.v2.A.nonSL21-1	239	86	361	53	302	90	2.2032	1.02279	3.27876	0.488023	2.78611	1.02972	0.464232	0.148844	0.369589	A6N7Y9	sp|A6N7Y9|PIWL1_CHICK Piwi-like protein 1 OS=Gallus gallus GN=PIWIL1 PE=2 SV=1	9e-122
KH.C2.104.v2.A.SL6-1	184	56	236	70	161	48	4.62883	1.81751	5.84941	1.75898	4.05336	1.4987	0.392649	0.30071	0.369742	Q9HBH5	sp|Q9HBH5|RDH14_HUMAN Retinol dehydrogenase 14 OS=Homo sapiens GN=RDH14 PE=1 SV=1	3e-39
KH.S390.8.v1.A.SL1-1	2737	750	4221	1112	3173	946	44.1179	15.5968	67.035	17.9041	51.1853	18.9256	0.353526	0.267086	0.369747	Q9GM70	sp|Q9GM70|ST17A_RABIT Serine/threonine-protein kinase 17A OS=Oryctolagus cuniculus GN=STK17A PE=2 SV=1	2e-56
KH.S781.1.v2.A.SL1-2	228	77	231	48	379	113	6.1754	2.69064	6.16437	1.29861	10.2732	3.79863	0.435703	0.210665	0.369762	Q96DR4	sp|Q96DR4|STAR4_HUMAN StAR-related lipid transfer protein 4 OS=Homo sapiens GN=STARD4 PE=2 SV=1	0.25
KH.C9.251.v1.A.SL1-1	2302	528	3141	1035	1734	517	14.5276	4.2989	19.5301	6.52437	10.9515	4.04948	0.295912	0.334068	0.369764	Q5VZL5	sp|Q5VZL5|ZMYM4_HUMAN Zinc finger MYM-type protein 4 OS=Homo sapiens GN=ZMYM4 PE=1 SV=1	0.091
KH.L172.19.v1.A.SL1-1	413	105	536	124	606	181	4.58304	1.50324	5.86024	1.37447	6.72995	2.49288	0.328	0.234541	0.370416	Q9H8M5	sp|Q9H8M5|CNNM2_HUMAN Metal transporter CNNM2 OS=Homo sapiens GN=CNNM2 PE=1 SV=2	3e-83
KH.S643.2.v1.A.ND3-1	593	197	717	194	393	118	11.9887	5.13826	14.2817	3.91766	7.9514	2.96085	0.428594	0.274312	0.372368	P80193	sp|P80193|BODG_PSESK Gamma-butyrobetaine dioxygenase OS=Pseudomonas sp. (strain AK-1) PE=1 SV=1	8e-07
KH.C1.1235.v1.A.SL1-1	904	250	1140	209	1095	329	13.4234	4.78928	16.6781	3.09992	16.2722	6.06331	0.356784	0.185868	0.372619	A5A6N3	sp|A5A6N3|ATG13_PANTR Autophagy-related protein 13 OS=Pan troglodytes GN=ATG13 PE=2 SV=1	2e-36
KH.C12.568.v2.R.ND2-1	879	292	1402	465	1274	383	9.41486	4.03499	14.7952	4.97493	13.6562	5.09146	0.428577	0.336254	0.372832	O43312	sp|O43312|MTSS1_HUMAN Metastasis suppressor protein 1 OS=Homo sapiens GN=MTSS1 PE=1 SV=2	4e-16
KH.C9.206.v1.A.nonSL11-1	145	42	105	37	113	34	5.24864	1.96138	3.74468	1.33779	4.09348	1.52748	0.373694	0.357252	0.37315	Q9CRB8	sp|Q9CRB8|MTFP1_MOUSE Mitochondrial fission process protein 1 OS=Mus musculus GN=Mtfp1 PE=1 SV=1	1e-22
KH.C3.668.v1.C.ND1-1	878	255	821	234	1132	341	36.1114	13.5308	33.269	9.61336	46.5942	17.407	0.374697	0.288958	0.373587	A8WFS8	sp|A8WFS8|PGAP3_DANRE Post-GPI attachment to proteins factor 3 OS=Danio rerio GN=pgap3 PE=2 SV=1	5e-24
KH.C1.297.v1.A.SL1-1	150	36	230	65	179	54	9.00396	2.78791	13.6024	3.89731	10.753	4.02304	0.309632	0.286515	0.374131	Q63699	sp|Q63699|CDK2_RAT Cyclin-dependent kinase 2 OS=Rattus norvegicus GN=Cdk2 PE=1 SV=1	2e-54
KH.C8.873.v1.A.ND1-1	884	207	1183	363	639	193	10.8301	3.27179	14.2795	4.44218	7.8346	2.93465	0.302101	0.311089	0.374576	Q16820	sp|Q16820|MEP1B_HUMAN Meprin A subunit beta OS=Homo sapiens GN=MEP1B PE=1 SV=3	1e-21
KH.C10.395.v1.A.ND1-1	788	97	938	111	542	164	17.1102	2.71728	20.0668	2.40747	11.7778	4.41969	0.158811	0.119973	0.375256	Q96FV0	sp|Q96FV0|LRC46_HUMAN Leucine-rich repeat-containing protein 46 OS=Homo sapiens GN=LRRC46 PE=2 SV=1	2e-11
KH.L18.53.v1.A.SL3-1	864	273	728	223	1110	336	14.4824	5.90371	12.0228	3.73372	18.6203	6.99015	0.407646	0.310553	0.375405	Q791F6	sp|Q791F6|TPRA1_RAT Transmembrane protein adipocyte-associated 1 OS=Rattus norvegicus GN=Tpra1 PE=2 SV=1	1e-31
KH.C8.871.v1.A.SL1-1	1874	342	2239	414	512	155	43.9107	10.3386	51.6894	9.6897	12.0062	4.50767	0.235446	0.18746	0.375444	Q9CQE8	sp|Q9CQE8|CN166_MOUSE UPF0568 protein C14orf166 homolog OS=Mus musculus PE=2 SV=1	2e-33
KH.C3.797.v1.A.nonSL3-1	174	48	177	52	241	73	5.89357	2.09751	5.90676	1.75931	8.16924	3.06882	0.355899	0.297847	0.375655	B5YFL3	sp|B5YFL3|RUVC_DICT6 Crossover junction endodeoxyribonuclease RuvC OS=Dictyoglomus thermophilum (strain ATCC 35947 / DSM 3960 / H-6-12) GN=ruvC PE=3 SV=1	0.77
KH.S390.12.v1.A.SL1-1	276	56	306	76	411	125	7.78753	2.03851	8.50665	2.14197	11.6056	4.37743	0.261766	0.251799	0.377182	Q9NX52	sp|Q9NX52|RHBL2_HUMAN Rhomboid-related protein 2 OS=Homo sapiens GN=RHBDL2 PE=1 SV=2	9e-35
KH.L44.21.v1.C.SL3-1	337	69	224	77	184	56	12.27	3.24114	8.03542	2.80036	6.70452	2.53059	0.264152	0.348502	0.377445	Q3SZ36	sp|Q3SZ36|TMM18_BOVIN Transmembrane protein 18 OS=Bos taurus GN=TMEM18 PE=2 SV=1	0.063
KH.C5.333.v1.A.SL2-1	528	64	487	98	220	67	10.2609	1.6046	9.32454	1.90234	4.27868	1.61602	0.15638	0.204014	0.37769	0	0	0
KH.C3.447.v1.A.SL2-1	653	130	993	292	410	125	15.5588	3.99613	23.3108	6.9495	9.77644	3.6965	0.256841	0.298123	0.378102	Q9NX74	sp|Q9NX74|DUS2L_HUMAN tRNA-dihydrouridine(20) synthase [NAD(P)+]-like OS=Homo sapiens GN=DUS2 PE=1 SV=1	3e-59
KH.L38.19.v1.A.SL3-1	579	222	855	276	831	254	11.7515	5.813	17.0972	5.5954	16.8791	6.39832	0.494662	0.327269	0.379067	Q9HC07	sp|Q9HC07|TM165_HUMAN Transmembrane protein 165 OS=Homo sapiens GN=TMEM165 PE=1 SV=1	4e-37
KH.C11.35.v1.A.SL2-1	400	138	514	160	641	196	8.90936	3.96552	11.2797	3.55972	14.2883	5.41828	0.445096	0.315587	0.379211	Q566Y9	sp|Q566Y9|MPPE1_DANRE Metallophosphoesterase 1 OS=Danio rerio GN=mppe1 PE=2 SV=1	9e-41
KH.C4.261.v2.A.ND1-2	677	103	705	102	490	150	18.3686	3.60545	18.8462	2.76437	13.3051	5.05123	0.196283	0.146681	0.379646	A9BUK7	sp|A9BUK7|MURC_DELAS UDP-N-acetylmuramate--L-alanine ligase OS=Delftia acidovorans (strain DSM 14801 / SPH-1) GN=murC PE=3 SV=1	0.65
KH.C9.507.v1.B.ND1-1	640	77	830	152	163	50	6.43387	0.998659	8.22085	1.52632	1.63989	0.623851	0.155219	0.185664	0.380422	Q5XFW6	sp|Q5XFW6|WDR6_RAT WD repeat-containing protein 6 OS=Rattus norvegicus GN=Wdr6 PE=1 SV=2	1e-11
KH.C12.56.v1.A.SL4-1	396	61	395	55	114	35	10.735	2.1334	10.55	1.48929	3.09278	1.17759	0.198733	0.141165	0.380756	Q5PQ04	sp|Q5PQ04|NUD17_XENLA Nucleoside diphosphate-linked moiety X motif 17 OS=Xenopus laevis GN=nudt17 PE=2 SV=1	1e-24
KH.C4.95.v2.A.SL3-1	225	41	200	47	114	35	6.68202	1.57088	5.85197	1.39422	3.38817	1.29007	0.235091	0.238249	0.380756	Q1LXV8	sp|Q1LXV8|TM136_DANRE Transmembrane protein 136 OS=Danio rerio GN=tmem136 PE=2 SV=1	6e-21
KH.L4.21.v1.C.SL1-1	2613	912	3523	1096	4748	1460	33.3941	15.0369	44.3597	13.991	60.7262	23.158	0.450287	0.315399	0.381352	Q9D6L8	sp|Q9D6L8|PPIL3_MOUSE Peptidyl-prolyl cis-trans isomerase-like 3 OS=Mus musculus GN=Ppil3 PE=2 SV=1	3e-53
KH.C11.179.v1.C.ND1-1	446	49	481	191	224	69	10.4979	1.48799	11.1548	4.49067	5.27658	2.01575	0.141741	0.402579	0.382019	Q8PWS3	sp|Q8PWS3|HIS1_METMA ATP phosphoribosyltransferase OS=Methanosarcina mazei (strain ATCC BAA-159 / DSM 3647 / Goe1 / Go1 / JCM 11833 / OCM 88) GN=hisG PE=3 SV=1	9.2
KH.L170.37.v1.A.SL2-1	379	116	329	114	133	41	7.15513	2.82534	6.11957	2.14977	2.51284	0.960685	0.394869	0.351295	0.38231	P43356	sp|P43356|MAGA2_HUMAN Melanoma-associated antigen 2 OS=Homo sapiens GN=MAGEA2 PE=1 SV=1	2.1
KH.L24.1.v1.A.SL1-1	610	99	649	158	350	108	13.7443	2.87781	14.4074	3.55598	7.89217	3.0202	0.209382	0.246817	0.382683	Q9NUJ1	sp|Q9NUJ1|ABHDA_HUMAN Mycophenolic acid acyl-glucuronide esterase, mitochondrial OS=Homo sapiens GN=ABHD10 PE=1 SV=1	3e-15
KH.C2.306.v3.A.ND3-1	222	59	219	64	165	51	8.71565	2.98836	8.47105	2.50978	6.48286	2.48505	0.342873	0.296277	0.383327	Q9H6F2	sp|Q9H6F2|TM38A_HUMAN Trimeric intracellular cation channel type A OS=Homo sapiens GN=TMEM38A PE=1 SV=1	0.004
KH.C1.301.v1.A.SL1-1	1146	190	1353	310	993	307	22.4674	4.8057	26.1344	6.07071	19.4829	7.47009	0.213896	0.232288	0.383418	Q9QWW1	sp|Q9QWW1|HOME2_MOUSE Homer protein homolog 2 OS=Mus musculus GN=Homer2 PE=1 SV=1	8e-31
KH.S659.1.v4.B.SL3-1	171	66	221	58	304	94	2.89283	1.44047	3.68354	0.980084	5.14678	1.97366	0.497946	0.266071	0.383475	Q15067	sp|Q15067|ACOX1_HUMAN Peroxisomal acyl-coenzyme A oxidase 1 OS=Homo sapiens GN=ACOX1 PE=1 SV=3	9e-111
KH.C1.1146.v1.A.SL1-1	335	127	274	111	297	92	4.73472	2.31573	3.81546	1.56704	4.20089	1.61382	0.489095	0.41071	0.384162	Q91WU2	sp|Q91WU2|S22A7_MOUSE Solute carrier family 22 member 7 OS=Mus musculus GN=Slc22a7 PE=1 SV=1	3e-05
KH.C5.512.v1.A.ND1-1	1343	341	1544	614	1688	523	38.8454	12.7248	44.0005	17.7395	48.862	18.7752	0.327577	0.403166	0.384249	Q6P3D0	sp|Q6P3D0|NUD16_MOUSE U8 snoRNA-decapping enzyme OS=Mus musculus GN=Nudt16 PE=1 SV=1	7e-11
KH.C9.468.v1.A.nonSL10-1	144	55	159	67	158	49	2.48888	1.22642	2.7076	1.15671	2.73296	1.05113	0.492759	0.427209	0.384612	Q8BJY1	sp|Q8BJY1|PSMD5_MOUSE 26S proteasome non-ATPase regulatory subunit 5 OS=Mus musculus GN=Psmd5 PE=1 SV=4	3e-29
KH.L117.2.v1.A.SL1-1	688	234	1038	247	1041	323	7.94668	3.48696	11.8125	2.84972	12.0333	4.6304	0.438795	0.241247	0.3848	Q90XC2	sp|Q90XC2|NEK8_DANRE Serine/threonine-protein kinase Nek8 OS=Danio rerio GN=nek8 PE=2 SV=1	1e-87
KH.L170.24.v1.A.nonSL4-1	523	96	752	307	238	74	9.61111	2.27603	13.6156	5.63533	4.37708	1.6878	0.236812	0.413888	0.385601	Q9H4I3	sp|Q9H4I3|TRABD_HUMAN TraB domain-containing protein OS=Homo sapiens GN=TRABD PE=1 SV=1	4e-29
KH.L41.78.v1.A.nonSL2-1	635	106	712	157	344	107	30.8508	6.64404	34.0815	7.61905	16.7258	6.452	0.215361	0.223554	0.385752	Q8TC21	sp|Q8TC21|ZN596_HUMAN Zinc finger protein 596 OS=Homo sapiens GN=ZNF596 PE=2 SV=2	3e-23
KH.C11.176.v1.C.ND1-1	1491	311	1563	381	1475	459	28.0464	7.54734	28.9671	7.15868	27.7669	10.716	0.269102	0.247132	0.385926	A0PJZ3	sp|A0PJZ3|GXLT2_HUMAN Glucoside xylosyltransferase 2 OS=Homo sapiens GN=GXYLT2 PE=2 SV=2	1.4
KH.C14.325.v1.C.SL2-1	297	100	287	116	241	75	4.95963	2.1544	4.72194	1.9349	4.02759	1.55443	0.434388	0.409768	0.385947	Q9GZT4	sp|Q9GZT4|SRR_HUMAN Serine racemase OS=Homo sapiens GN=SRR PE=1 SV=1	1e-54
KH.C1.364.v1.A.ND1-1	829	295	766	196	668	208	21.7341	9.97801	19.7862	5.13278	17.5267	6.76814	0.459094	0.259412	0.386163	Q7VQB1	sp|Q7VQB1|TGT_BLOFL Queuine tRNA-ribosyltransferase OS=Blochmannia floridanus GN=tgt PE=3 SV=1	0.15
KH.C3.681.v1.A.SL1-1	264	57	219	19	228	71	8.76065	2.44029	7.16017	0.629789	7.57186	2.92422	0.278551	0.0879573	0.386195	Q8LBA6	sp|Q8LBA6|PIS1_ARATH CDP-diacylglycerol--inositol 3-phosphatidyltransferase 1 OS=Arabidopsis thaliana GN=PIS1 PE=1 SV=2	4e-06
KH.C2.330.v1.A.ND1-1	892	219	733	205	549	171	11.8275	3.74634	9.5759	2.71514	7.28513	2.81413	0.316748	0.283539	0.386284	B1H1P9	sp|B1H1P9|PPAL_XENLA Lysosomal acid phosphatase OS=Xenopus laevis GN=acp2 PE=2 SV=1	1e-40
KH.C9.556.v2.A.ND2-1	660	254	713	203	475	148	17.8296	8.85248	18.9772	5.47774	12.8418	4.96223	0.496506	0.288648	0.386413	Q9DA08	sp|Q9DA08|SGF29_MOUSE SAGA-associated factor 29 homolog OS=Mus musculus GN=Ccdc101 PE=2 SV=1	4e-73
KH.L152.42.v1.A.ND1-1	1066	382	950	232	353	110	30.7761	14.2283	27.0226	6.69042	10.1992	3.94156	0.462318	0.247586	0.386457	A6ZVS5	sp|A6ZVS5|PAN1_YEAS7 Actin cytoskeleton-regulatory complex protein PAN1 OS=Saccharomyces cerevisiae (strain YJM789) GN=PAN1 PE=3 SV=2	2.1
KH.C9.426.v1.A.SL1-1	2862	719	4242	1006	2772	864	36.7121	11.8988	53.6113	12.8898	35.5851	13.7554	0.324111	0.240431	0.386548	Q9WVR1	sp|Q9WVR1|INP5E_RAT 72 kDa inositol polyphosphate 5-phosphatase OS=Rattus norvegicus GN=Inpp5e PE=2 SV=2	1e-53
KH.C4.75.v2.A.SL1-2	762	148	1141	266	497	155	14.3683	3.60037	21.1974	5.01005	9.37871	3.62745	0.250577	0.236352	0.386775	O57429	sp|O57429|UBP2_CHICK Ubiquitin carboxyl-terminal hydrolase 2 OS=Gallus gallus GN=USP2 PE=2 SV=1	2e-46
KH.L154.46.v1.A.SL1-1	2829	772	2971	1263	3213	1003	55.8502	19.6627	57.7884	24.906	63.4801	24.576	0.352062	0.430986	0.387145	Q5R6K8	sp|Q5R6K8|PP4C_PONAB Serine/threonine-protein phosphatase 4 catalytic subunit OS=Pongo abelii GN=PPP4C PE=2 SV=1	3e-128
KH.C3.646.v1.C.SL2-1	813	292	1125	459	653	204	7.80944	3.61865	10.647	4.40404	6.27737	2.43208	0.463369	0.41364	0.387436	Q5ZLG9	sp|Q5ZLG9|WDR59_CHICK WD repeat-containing protein 59 OS=Gallus gallus GN=WDR59 PE=2 SV=1	3e-34
KH.C11.79.v1.A.SL3-1	234	68	138	53	352	110	6.14002	2.30196	3.56763	1.38912	9.2434	3.58233	0.37491	0.389367	0.387555	Q6IMG9	sp|Q6IMG9|TEPP_RAT Testis, prostate and placenta-expressed protein OS=Rattus norvegicus GN=Tepp PE=2 SV=1	3e-17
KH.C8.879.v2.A.SL2-1	899	290	1117	311	840	263	18.9385	7.88167	23.1838	6.54418	17.7093	6.87639	0.416172	0.282273	0.388293	Q8BYB9	sp|Q8BYB9|PGLT1_MOUSE Protein O-glucosyltransferase 1 OS=Mus musculus GN=Poglut1 PE=2 SV=2	2e-88
KH.C9.369.v1.A.SL1-1	1866	490	2485	613	692	217	53.084	17.9838	69.6506	17.4189	19.7012	7.66179	0.338781	0.25009	0.388899	Q80W37	sp|Q80W37|SPN1_MOUSE Snurportin-1 OS=Mus musculus GN=Snupn PE=2 SV=1	2e-45
KH.C10.608.v1.A.SL1-1	1582	284	1796	485	883	277	26.5319	6.1449	29.6767	8.12481	14.8204	5.76582	0.231604	0.273778	0.389047	Q60HG0	sp|Q60HG0|FKTN_MACFA Fukutin OS=Macaca fascicularis GN=FKTN PE=2 SV=1	1e-43
KH.C5.607.v1.A.ND1-1	2433	537	3334	939	1981	622	27.5194	7.83621	37.1543	10.6089	22.4242	8.73186	0.284752	0.285537	0.389394	A1A5P5	sp|A1A5P5|ARMC9_RAT LisH domain-containing protein ARMC9 OS=Rattus norvegicus GN=Armc9 PE=2 SV=1	3e-80
KH.C7.610.v1.A.SL1-1	2019	713	2180	911	2175	684	21.4994	9.7952	22.8714	9.68984	23.1784	9.03991	0.455604	0.423667	0.390014	Q68Y62	sp|Q68Y62|CPT1A_HORSE Carnitine O-palmitoyltransferase 1, liver isoform OS=Equus caballus GN=CPT1A PE=2 SV=1	3e-28
KH.C9.239.v1.A.SL1-1	3483	733	3636	1114	5191	1635	83.1153	22.5666	85.4866	26.5535	123.969	48.4244	0.271509	0.310616	0.390616	0	0	0
KH.C11.537.v2.A.ND1-1	811	275	1077	384	1609	507	16.4494	7.1961	21.5225	7.77983	32.6604	12.7631	0.437468	0.361475	0.390783	P50867	sp|P50867|CYSK_EMENI Cysteine synthase OS=Emericella nidulans (strain FGSC A4 / ATCC 38163 / CBS 112.46 / NRRL 194 / M139) GN=cysB PE=3 SV=2	7e-73
KH.C5.122.v1.R.ND1-1	243	89	385	162	384	121	5.05741	2.38971	7.89457	3.36779	7.99812	3.12554	0.472518	0.426596	0.390785	Q9W0P5	sp|Q9W0P5|GALE_DROME Probable UDP-glucose 4-epimerase OS=Drosophila melanogaster GN=Gale PE=2 SV=1	1e-67
KH.C8.41.v1.A.ND2-1	839	126	898	133	295	93	18.674	3.6181	19.6924	2.9569	6.57103	2.56908	0.193751	0.150154	0.390971	Q86SQ0	sp|Q86SQ0|PHLB2_HUMAN Pleckstrin homology-like domain family B member 2 OS=Homo sapiens GN=PHLDB2 PE=1 SV=2	1.1
KH.C10.96.v1.A.SL1-1	1874	495	2309	783	1994	629	30.4439	10.3746	36.9573	12.7058	32.4183	12.6823	0.340777	0.343796	0.391209	Q6DKP5	sp|Q6DKP5|WDR13_PANTR WD repeat-containing protein 13 OS=Pan troglodytes GN=WDR13 PE=3 SV=1	1e-103
KH.C4.416.v1.A.SL1-1	2996	596	4703	1114	2395	756	28.7255	7.37235	44.427	10.6689	22.9809	8.99634	0.256649	0.240145	0.391471	Q91ZM2	sp|Q91ZM2|SH2B1_MOUSE SH2B adapter protein 1 OS=Mus musculus GN=Sh2b1 PE=1 SV=2	1e-24
KH.S1206.3.v1.A.nonSL10-1	292	92	205	53	133	42	6.54604	2.66083	4.52789	1.18681	2.98389	1.16859	0.40648	0.262111	0.391635	Q08DJ7	sp|Q08DJ7|AAR2_BOVIN Protein AAR2 homolog OS=Bos taurus GN=AAR2 PE=2 SV=1	2e-53
KH.L25.13.v1.A.ND1-1	482	152	682	169	228	72	11.6541	4.74143	16.2466	4.08156	5.51698	2.16064	0.406847	0.251226	0.391635	Q5RH51	sp|Q5RH51|XYLK_DANRE Glycosaminoglycan xylosylkinase OS=Danio rerio GN=fam20b PE=2 SV=1	3e-69
KH.C2.606.v1.A.SL2-1	1946	556	2841	1012	1376	435	48.797	17.987	70.1888	25.3478	34.5306	13.5381	0.368609	0.361137	0.392061	Q5R493	sp|Q5R493|IF2A_PONAB Eukaryotic translation initiation factor 2 subunit 1 OS=Pongo abelii GN=EIF2S1 PE=2 SV=1	6e-80
KH.C1.111.v4.R.ND2-2	1300	342	1646	621	1015	321	13.6745	4.64118	17.0586	6.52481	10.6849	4.19075	0.339404	0.382494	0.392213	Q6NRL1	sp|Q6NRL1|AGAP1_XENLA Arf-GAP with GTPase, ANK repeat and PH domain-containing protein 1 OS=Xenopus laevis GN=agap1 PE=2 SV=1	1e-110
KH.C4.316.v1.R.ND2-1	992	332	1391	464	1447	458	16.1323	6.96557	22.2873	7.53722	23.5499	9.24418	0.431778	0.338184	0.392537	Q9QXE7	sp|Q9QXE7|TBL1X_MOUSE F-box-like/WD repeat-containing protein TBL1X OS=Mus musculus GN=Tbl1x PE=2 SV=2	2e-137
KH.S164.16.v1.A.ND1-1	2541	922	2762	526	1974	625	59.3607	27.7881	63.5717	12.2741	46.1505	18.1214	0.468124	0.193074	0.39266	Q5F3A6	sp|Q5F3A6|OTU1_CHICK Ubiquitin thioesterase OTU1 OS=Gallus gallus GN=YOD1 PE=2 SV=1	9e-43
KH.C9.733.v2.A.ND1-1	398	74	476	90	120	38	12.0032	2.87925	14.1438	2.71122	3.62185	1.42238	0.239874	0.191689	0.392722	Q9BQA5	sp|Q9BQA5|HINFP_HUMAN Histone H4 transcription factor OS=Homo sapiens GN=HINFP PE=1 SV=2	3e-32
KH.S598.3.v1.A.nonSL3-1	623	149	549	84	574	182	9.70023	2.99305	8.42195	1.30642	8.9442	3.5171	0.308555	0.155121	0.393227	Q92838	sp|Q92838|EDA_HUMAN Ectodysplasin-A OS=Homo sapiens GN=EDA PE=1 SV=2	0.14
KH.L108.20.v3.A.SL1-1	147	55	252	104	230	73	1.46876	0.708973	2.48073	1.03795	2.29983	0.905262	0.482703	0.418403	0.393621	Q8IVL1	sp|Q8IVL1|NAV2_HUMAN Neuron navigator 2 OS=Homo sapiens GN=NAV2 PE=1 SV=3	1e-22
KH.C13.96.v2.B.ND1-1	341	118	390	149	362	115	5.22055	2.33066	5.88265	2.27854	5.54634	2.18514	0.446439	0.387333	0.393979	A6QLU1	sp|A6QLU1|GPDM_BOVIN Glycerol-3-phosphate dehydrogenase, mitochondrial OS=Bos taurus GN=GPD2 PE=2 SV=1	3e-30
KH.C7.453.v1.A.SL3-1	410	22	576	40	151	48	5.12602	0.354857	7.09521	0.499534	1.88933	0.744829	0.0692266	0.0704044	0.394228	A2RRS8	sp|A2RRS8|CEP78_XENTR Centrosomal protein of 78 kDa OS=Xenopus tropicalis GN=cep78 PE=2 SV=1	6e-25
KH.C5.370.v3.A.ND2-2	121	38	142	37	261	83	5.86948	2.37811	6.78655	1.79277	12.6704	4.99702	0.405166	0.264165	0.394385	C6DBV7	sp|C6DBV7|LIPB_PECCP Octanoyltransferase OS=Pectobacterium carotovorum subsp. carotovorum (strain PC1) GN=lipB PE=3 SV=1	4
KH.C11.498.v1.A.SL2-1	2656	709	3469	1187	1662	529	48.6365	16.75	62.5871	21.7117	30.458	12.0229	0.344392	0.346904	0.394737	Q92993	sp|Q92993|KAT5_HUMAN Histone acetyltransferase KAT5 OS=Homo sapiens GN=KAT5 PE=1 SV=2	2e-127
KH.C7.350.v2.C.SL3-1	136	33	139	40	135	43	2.94071	0.92058	2.96125	0.863937	2.92134	1.15399	0.313047	0.291748	0.395019	O55071	sp|O55071|CP2BJ_MOUSE Cytochrome P450 2B19 OS=Mus musculus GN=Cyp2b19 PE=2 SV=1	6e-30
KH.C8.848.v1.A.SL2-1	692	107	829	162	386	123	11.1544	2.22514	13.1656	2.60834	6.22677	2.46073	0.199486	0.198118	0.395186	Q9Y2B1	sp|Q9Y2B1|TMEM5_HUMAN Transmembrane protein 5 OS=Homo sapiens GN=TMEM5 PE=1 SV=1	4e-33
KH.C2.634.v1.A.SL6-1	173	36	245	67	138	44	3.69451	0.991854	5.15494	1.4292	2.94934	1.16622	0.268467	0.27725	0.395418	Q60HH2	sp|Q60HH2|ACY2_MACFA Aspartoacylase OS=Macaca fascicularis GN=ASPA PE=2 SV=1	2e-31
KH.C2.78.v1.A.SL2-1	1462	288	1395	380	922	294	53.4183	13.5759	50.2184	13.8687	33.7139	13.3324	0.254144	0.276167	0.395457	Q5XJK1	sp|Q5XJK1|SCOCB_DANRE Short coiled-coil protein B OS=Danio rerio GN=scocb PE=3 SV=1	5e-12
KH.C2.879.v1.A.SL1-1	393	104	474	186	169	54	5.71554	1.95134	6.79187	2.70201	2.45972	0.974713	0.341409	0.39783	0.396269	Q9VQX4	sp|Q9VQX4|PNCB_DROME Nicotinate phosphoribosyltransferase OS=Drosophila melanogaster GN=CG3714 PE=2 SV=2	6e-114
KH.C12.634.v1.A.nonSL3-1	1318	310	1740	326	1927	617	21.267	6.45337	27.6622	5.25432	31.1177	12.3565	0.303445	0.189946	0.397088	Q7T3T4	sp|Q7T3T4|SMS1_CHICK Phosphatidylcholine:ceramide cholinephosphotransferase 1 OS=Gallus gallus GN=SGMS1 PE=2 SV=2	9e-51
KH.L84.15.v5.A.ND2-1	296	89	320	111	128	41	6.96197	2.70063	7.41544	2.60779	3.01291	1.19686	0.387912	0.35167	0.397244	Q9Y5M8	sp|Q9Y5M8|SRPRB_HUMAN Signal recognition particle receptor subunit beta OS=Homo sapiens GN=SRPRB PE=1 SV=3	9e-31
KH.S364.5.v1.A.SL1-1	1683	464	2075	524	799	256	40.1617	14.285	48.7857	12.4902	19.0814	7.58205	0.355687	0.256021	0.397353	Q9NPI1	sp|Q9NPI1|BRD7_HUMAN Bromodomain-containing protein 7 OS=Homo sapiens GN=BRD7 PE=1 SV=1	0.13
KH.C9.638.v1.A.ND1-1	1152	407	1538	405	686	220	18.7735	8.55702	24.6943	6.59261	11.188	4.44975	0.455802	0.266969	0.397724	Q05823	sp|Q05823|RN5A_HUMAN 2-5A-dependent ribonuclease OS=Homo sapiens GN=RNASEL PE=1 SV=2	3e-05
KH.C2.106.v1.A.nonSL2-1	1054	361	1363	521	617	198	15.4225	6.81483	19.6497	7.61482	9.03512	3.59581	0.441877	0.387529	0.397982	Q803A7	sp|Q803A7|SPCS_DANRE O-phosphoseryl-tRNA(Sec) selenium transferase OS=Danio rerio GN=sepsecs PE=2 SV=1	2e-113
KH.C10.278.v1.A.SL1-1	2862	834	3042	1242	2373	762	49.632	18.6592	51.9754	21.5141	41.1837	16.4008	0.375951	0.413928	0.398236	Q5RAR0	sp|Q5RAR0|EI2BA_PONAB Translation initiation factor eIF-2B subunit alpha OS=Pongo abelii GN=EIF2B1 PE=2 SV=2	2e-53
KH.C10.177.v1.A.ND1-1	1307	416	1573	669	1633	526	38.2309	15.6988	45.3329	19.5467	47.8036	19.096	0.410631	0.431181	0.399469	Q5ZL16	sp|Q5ZL16|WIPI3_CHICK WD repeat domain phosphoinositide-interacting protein 3 OS=Gallus gallus GN=WDR45B PE=2 SV=1	7e-78
KH.C8.36.v1.A.ND1-1	401	57	363	82	149	48	8.50516	1.55972	7.58562	1.73724	3.16271	1.26357	0.183385	0.229018	0.39952	A5PJU6	sp|A5PJU6|HYKK_BOVIN Hydroxylysine kinase OS=Bos taurus GN=HYKK PE=2 SV=1	1e-07
KH.L47.1.v1.A.nonSL5-1	498	122	661	252	360	116	4.91732	1.55415	6.43054	2.48547	3.55744	1.4216	0.316057	0.386511	0.399612	Q80YA7	sp|Q80YA7|DPP8_MOUSE Dipeptidyl peptidase 8 OS=Mus musculus GN=Dpp8 PE=2 SV=1	5e-78
KH.C8.572.v2.A.SL1-1	514	101	997	356	630	203	3.49489	0.885986	6.67902	2.41785	4.28693	1.71311	0.253509	0.362007	0.399612	A8WGF4	sp|A8WGF4|IF122_XENTR Intraflagellar transport protein 122 homolog OS=Xenopus tropicalis GN=ift122 PE=2 SV=1	0
KH.C4.640.v1.A.ND1-1	292	102	377	154	496	160	3.66398	1.65122	4.66078	1.93019	6.22856	2.49178	0.450663	0.414135	0.400057	Q96JK4	sp|Q96JK4|HIPL1_HUMAN HHIP-like protein 1 OS=Homo sapiens GN=HHIPL1 PE=2 SV=2	2e-91
KH.S2295.1.v1.A.ND1-1	719	277	1353	343	941	304	21.8111	10.8408	40.4383	10.3932	28.5676	11.4457	0.497033	0.257015	0.400652	A0JME2	sp|A0JME2|MCAF1_DANRE Activating transcription factor 7-interacting protein 1 OS=Danio rerio GN=atf7ip PE=1 SV=2	9e-15
KH.C12.70.v1.A.SL1-1	194	71	314	99	352	114	4.42566	2.08963	7.05752	2.2559	8.03627	3.22775	0.472162	0.319645	0.401648	Q8R537	sp|Q8R537|PEX7_CRIGR Peroxisomal targeting signal 2 receptor OS=Cricetulus griseus GN=PEX7 PE=1 SV=1	5e-16
KH.C11.628.v1.A.SL1-1	2331	667	3469	1425	2487	806	22.384	8.26334	32.8206	13.6684	23.9005	9.60614	0.369163	0.41646	0.401923	A7MB78	sp|A7MB78|GYS1_BOVIN Glycogen [starch] synthase, muscle OS=Bos taurus GN=GYS1 PE=2 SV=1	2e-145
KH.C1.548.v1.A.SL2-1	404	114	780	163	684	222	4.8056	1.74947	9.14129	1.9367	8.14251	3.27747	0.364047	0.211863	0.402513	Q1LW89	sp|Q1LW89|CASD1_DANRE CAS1 domain-containing protein 1 OS=Danio rerio GN=casd1 PE=2 SV=2	5e-81
KH.C5.611.v1.A.ND1-1	1548	515	1902	696	3052	994	39.4857	16.9477	47.7997	17.7332	77.9091	31.4683	0.429211	0.370989	0.403911	Q8TB40	sp|Q8TB40|ABHD4_HUMAN Abhydrolase domain-containing protein 4 OS=Homo sapiens GN=ABHD4 PE=2 SV=1	6e-53
KH.C13.30.v3.B.SL3-1	512	93	735	285	162	53	6.02572	1.41207	8.52262	3.35037	1.90805	0.774166	0.234341	0.393115	0.405737	Q6P1R4	sp|Q6P1R4|DUS1L_HUMAN tRNA-dihydrouridine(16/17) synthase [NAD(P)(+)]-like OS=Homo sapiens GN=DUS1L PE=1 SV=1	3e-64
KH.L170.58.v1.A.ND1-1	322	91	352	78	327	107	6.30092	2.29733	6.78637	1.52459	6.40371	2.59867	0.364603	0.224654	0.405807	Q9VH78	sp|Q9VH78|ALG12_DROME Probable Dol-P-Man:Man(7)GlcNAc(2)-PP-Dol alpha-1,6-mannosyltransferase OS=Drosophila melanogaster GN=CG8412 PE=2 SV=1	2e-24
KH.L3.13.v2.A.SL2-1	715	203	1168	439	528	173	5.69029	2.08429	9.15836	3.48981	4.20531	1.70881	0.366289	0.381052	0.406346	Q14678	sp|Q14678|KANK1_HUMAN KN motif and ankyrin repeat domain-containing protein 1 OS=Homo sapiens GN=KANK1 PE=1 SV=3	5e-27
KH.L96.30.v1.A.ND1-1	1573	305	2251	484	1008	331	11.9148	2.98053	16.7989	3.66196	7.64108	3.11176	0.250153	0.217988	0.40724	Q9LTJ8	sp|Q9LTJ8|MBD13_ARATH Methyl-CpG-binding domain-containing protein 13 OS=Arabidopsis thaliana GN=MBD13 PE=2 SV=1	4.3
KH.C4.787.v1.A.SL2-1	665	66	651	130	353	116	11.1109	1.42267	10.7165	2.16959	5.9025	2.40548	0.128043	0.202453	0.407537	E1BD52	sp|E1BD52|TM245_BOVIN Transmembrane protein 245 OS=Bos taurus GN=TMEM245 PE=3 SV=1	2e-37
KH.C1.835.v1.A.nonSL4-1	665	205	750	327	550	181	15.4193	6.13242	17.1337	7.57356	12.7627	5.20884	0.39771	0.442027	0.408131	Q9DC16	sp|Q9DC16|ERGI1_MOUSE Endoplasmic reticulum-Golgi intermediate compartment protein 1 OS=Mus musculus GN=Ergic1 PE=1 SV=1	8e-73
KH.C2.511.v2.A.ND1-1	485	170	549	162	328	108	15.8242	7.15587	17.6481	5.27963	10.71	4.37343	0.452211	0.299161	0.408351	Q3T0Q3	sp|Q3T0Q3|RPB3_BOVIN DNA-directed RNA polymerase II subunit RPB3 OS=Bos taurus GN=POLR2C PE=2 SV=1	5e-83
KH.C1.385.v1.A.SL1-1	2263	835	2245	594	1971	649	75.2567	35.8246	73.5569	19.7313	65.5968	26.787	0.476032	0.268246	0.408358	Q9HCI7	sp|Q9HCI7|MSL2_HUMAN E3 ubiquitin-protein ligase MSL2 OS=Homo sapiens GN=MSL2 PE=1 SV=2	2e-17
KH.L164.10.v1.A.nonSL3-1	445	148	450	163	355	117	8.63174	3.70369	8.59998	3.15817	6.89132	2.81672	0.429078	0.367229	0.408734	P13360	sp|P13360|GLAS_DROME Protein glass OS=Drosophila melanogaster GN=gl PE=1 SV=2	5e-09
KH.C4.475.v1.A.ND1-1	1698	373	2220	551	997	329	17.9216	5.07905	23.0855	5.80898	10.531	4.30977	0.283404	0.251629	0.409246	Q9NPA5	sp|Q9NPA5|ZF64A_HUMAN Zinc finger protein 64 homolog, isoforms 1 and 2 OS=Homo sapiens GN=ZFP64 PE=1 SV=3	4e-15
KH.C5.164.v1.A.ND1-1	754	257	583	124	318	105	12.7625	5.61217	9.7225	2.09649	5.38673	2.20582	0.43974	0.215633	0.409492	Q9Y672	sp|Q9Y672|ALG6_HUMAN Dolichyl pyrophosphate Man9GlcNAc2 alpha-1,3-glucosyltransferase OS=Homo sapiens GN=ALG6 PE=1 SV=1	1e-54
KH.L76.2.v3.A.nonSL7-1	405	152	390	131	224	74	11.0078	5.32996	10.4438	3.55653	6.09298	2.4963	0.484198	0.340541	0.409701	Q3URR0	sp|Q3URR0|CENPW_MOUSE Centromere protein W OS=Mus musculus GN=Cenpw PE=2 SV=1	2
KH.L153.29.v1.A.ND1-1	814	192	934	344	345	114	12.8478	3.90968	14.5244	5.42342	5.44955	2.23321	0.304306	0.3734	0.409797	O88310	sp|O88310|ITL1A_MOUSE Intelectin-1a OS=Mus musculus GN=Itln1 PE=1 SV=1	2e-18
KH.C1.280.v1.A.SL2-1	1753	598	2056	889	2119	701	41.8321	18.4104	48.3389	21.1904	50.6051	20.7618	0.440102	0.43837	0.410271	Q5HZE0	sp|Q5HZE0|MCATL_RAT Mitochondrial carnitine/acylcarnitine carrier protein CACL OS=Rattus norvegicus GN=Slc25a29 PE=2 SV=1	5e-51
KH.C11.422.v1.C.SL3-1	140	43	129	55	139	46	6.84452	2.71218	6.21371	2.68588	6.80088	2.7912	0.396255	0.43225	0.410418	P53368	sp|P53368|8ODP_MOUSE 7,8-dihydro-8-oxoguanine triphosphatase OS=Mus musculus GN=Nudt1 PE=1 SV=1	7e-22
KH.L71.6.v1.A.SL2-1	1070	330	2005	546	719	238	17.0093	6.76786	31.4025	8.66971	11.4385	4.69569	0.397891	0.276084	0.410517	Q6DFC2	sp|Q6DFC2|CCD77_XENLA Coiled-coil domain-containing protein 77 OS=Xenopus laevis GN=ccdc77 PE=2 SV=1	4e-33
KH.L109.1.v2.A.SL3-1	434	146	572	151	175	58	7.10245	3.08252	9.22276	2.46834	2.8661	1.17805	0.434008	0.267635	0.41103	Q8VEK6	sp|Q8VEK6|ING3_MOUSE Inhibitor of growth protein 3 OS=Mus musculus GN=Ing3 PE=2 SV=2	4e-33
KH.C4.108.v1.A.SL1-1	703	221	856	311	988	328	19.6749	7.97967	23.6036	8.69415	27.6726	11.3933	0.405575	0.36834	0.411718	Q4R8N7	sp|Q4R8N7|STIP1_MACFA Stress-induced-phosphoprotein 1 OS=Macaca fascicularis GN=STIP1 PE=2 SV=1	2e-05
KH.C1.628.v1.A.SL2-1	216	77	359	157	337	112	5.8402	2.68596	9.56346	4.24017	9.11884	3.75847	0.459908	0.443371	0.412165	Q2M2I8	sp|Q2M2I8|AAK1_HUMAN AP2-associated protein kinase 1 OS=Homo sapiens GN=AAK1 PE=1 SV=3	1.8
KH.L44.5.v1.A.nonSL3-1	800	270	1230	537	547	182	8.0658	3.51201	12.2183	5.40805	5.51926	2.27745	0.43542	0.442621	0.412636	Q0V9R3	sp|Q0V9R3|DI3L2_XENTR DIS3-like exonuclease 2 OS=Xenopus tropicalis GN=dis3l2 PE=2 SV=2	3e-105
KH.S654.4.v1.A.nonSL11-1	469	156	484	190	393	131	8.49326	3.64469	8.63562	3.43688	7.12246	2.94437	0.429127	0.397989	0.413392	Q6AY62	sp|Q6AY62|NEUFC_RAT Neuferricin OS=Rattus norvegicus GN=Cyb5d2 PE=2 SV=1	3e-37
KH.C7.641.v1.A.nonSL4-1	674	142	909	131	531	177	7.02317	1.90896	9.33219	1.36349	5.53737	2.2891	0.271808	0.146107	0.413392	Q8YRI1	sp|Q8YRI1|YY46_NOSS1 Uncharacterized WD repeat-containing protein alr3466 OS=Nostoc sp. (strain PCC 7120 / UTEX 2576) GN=alr3466 PE=4 SV=1	2e-36
KH.C11.663.v1.A.SL1-1	843	183	885	215	1193	398	12.8869	3.60916	13.3294	3.28298	18.2514	7.55132	0.280064	0.246296	0.413739	Q90Y90	sp|Q90Y90|KREM1_XENLA Kremen protein 1 OS=Xenopus laevis GN=kremen1 PE=2 SV=1	2e-09
KH.C2.816.v1.A.SL1-1	2827	824	2941	1286	3159	1054	52.51	19.746	53.8218	23.8598	58.7221	24.2983	0.376042	0.443311	0.413785	Q28HF8	sp|Q28HF8|NTCP7_XENTR Sodium/bile acid cotransporter 7 OS=Xenopus tropicalis GN=slc10a7 PE=2 SV=1	8e-69
KH.C9.725.v1.A.SL3-1	420	96	504	169	827	276	7.29165	2.15022	8.62092	2.9307	14.3687	5.94709	0.294887	0.339953	0.413892	Q9WV54	sp|Q9WV54|ASAH1_MOUSE Acid ceramidase OS=Mus musculus GN=Asah1 PE=1 SV=1	4e-71
KH.C8.921.v1.A.SL1-1	2387	632	3204	659	3235	1081	54.6543	18.6691	72.2789	15.0719	74.128	30.7197	0.341585	0.208524	0.414414	F7B645	sp|F7B645|TM231_XENTR Transmembrane protein 231 OS=Xenopus tropicalis GN=tmem231 PE=2 SV=1	1e-47
KH.L155.2.v1.A.SL1-1	1683	592	2210	771	2581	864	17.3395	7.86881	22.4332	7.93444	26.6119	11.048	0.453808	0.353691	0.415154	P51793	sp|P51793|CLCN4_HUMAN H(+)/Cl(-) exchange transporter 4 OS=Homo sapiens GN=CLCN4 PE=1 SV=2	9e-172
KH.C8.609.v1.A.nonSL5-1	237	71	237	87	289	97	10.8053	4.17619	10.6459	3.96201	13.1862	5.48881	0.386495	0.372163	0.416253	O15155	sp|O15155|BET1_HUMAN BET1 homolog OS=Homo sapiens GN=BET1 PE=1 SV=1	2e-09
KH.L57.2.v1.C.SL2-1	776	209	1086	299	983	330	14.457	5.02338	19.9339	5.56411	18.3276	7.63042	0.347471	0.279128	0.416336	E1C6Q1	sp|E1C6Q1|PCH2_CHICK Pachytene checkpoint protein 2 homolog OS=Gallus gallus GN=TRIP13 PE=3 SV=1	4e-58
KH.C5.123.v1.A.SL1-1	327	104	308	108	396	133	8.21295	3.36992	7.62164	2.70947	9.95364	4.14593	0.410317	0.355497	0.416524	Q8BIZ1	sp|Q8BIZ1|ANS1B_MOUSE Ankyrin repeat and sterile alpha motif domain-containing protein 1B OS=Mus musculus GN=Anks1b PE=1 SV=3	4e-27
KH.C14.114.v1.A.SL1-1	974	119	1353	300	312	105	24.0359	3.78864	32.8962	7.39489	7.70534	3.21595	0.157624	0.224795	0.417367	Q642C0	sp|Q642C0|DNJC8_RAT DnaJ homolog subfamily C member 8 OS=Rattus norvegicus GN=Dnajc8 PE=2 SV=1	8e-20
KH.C3.673.v3.A.SL1-3	1732	654	1907	558	1182	398	49.0923	23.9154	53.2553	15.7982	33.5288	14.0013	0.487152	0.296651	0.417589	Q5HZH2	sp|Q5HZH2|TSR3_MOUSE Ribosome biogenesis protein TSR3 homolog OS=Mus musculus GN=Tsr3 PE=2 SV=1	6e-38
KH.C2.994.v1.A.SL1-1	2435	477	3696	856	3357	1131	47.0853	11.8998	70.4149	16.5336	64.964	27.1436	0.252728	0.234803	0.417825	Q06003	sp|Q06003|GOLI_DROME Protein goliath OS=Drosophila melanogaster GN=gol PE=2 SV=3	5e-05
KH.C1.149.v1.A.ND1-1	932	295	1182	421	625	211	12.874	5.25718	16.0865	5.80882	8.63997	3.61741	0.408357	0.3611	0.418683	Q01887	sp|Q01887|RYK_MOUSE Tyrosine-protein kinase RYK OS=Mus musculus GN=Ryk PE=1 SV=2	2e-58
KH.C8.882.v1.A.SL2-1	1124	344	1336	362	591	200	24.2199	9.5631	28.3634	7.79154	12.7447	5.34878	0.394845	0.274704	0.419687	Q8YA32	sp|Q8YA32|INLI_LISMO Internalin-I OS=Listeria monocytogenes serovar 1/2a (strain ATCC BAA-679 / EGD-e) GN=inlI PE=4 SV=1	0.007
KH.C12.102.v1.C.ND1-1	365	48	401	92	254	86	16.3298	2.77053	17.6758	4.11135	11.3725	4.77534	0.169661	0.232598	0.419902	Q58DH9	sp|Q58DH9|NAGAB_BOVIN Alpha-N-acetylgalactosaminidase OS=Bos taurus GN=NAGA PE=2 SV=1	0.022
KH.C4.258.v1.A.ND1-1	3296	1094	4706	1489	3343	1132	40.5078	17.3462	56.9836	18.2791	41.1172	17.267	0.428218	0.320778	0.419946	Q0IID9	sp|Q0IID9|GLPK_BOVIN Glycerol kinase OS=Bos taurus GN=GK PE=2 SV=1	3e-120
KH.S455.8.v1.B.SL1-1	1612	440	2365	330	1408	477	12.9017	4.54327	18.6491	2.63818	11.2777	4.73825	0.352145	0.141464	0.420145	P13993	sp|P13993|PRP2_SOYBN Repetitive proline-rich cell wall protein 2 OS=Glycine max GN=PRP2 PE=2 SV=1	2e-16
KH.C8.314.v1.A.SL2-1	485	136	814	337	977	331	3.16683	1.14566	5.23665	2.19797	6.38429	2.68244	0.361769	0.419728	0.420162	E1BLP6	sp|E1BLP6|ARI5B_BOVIN AT-rich interactive domain-containing protein 5B OS=Bos taurus GN=ARID5B PE=3 SV=1	5e-19
KH.C2.632.v1.A.SL1-2	731	242	713	181	719	244	39.0541	16.6801	37.5306	9.6591	38.4427	16.1792	0.427103	0.257366	0.420866	Q5RDW9	sp|Q5RDW9|CSTF3_PONAB Cleavage stimulation factor subunit 3 OS=Pongo abelii GN=CSTF3 PE=2 SV=1	3e-13
KH.C8.595.v4.A.SL3-1	731	159	705	271	598	203	18.3747	5.15625	17.4597	6.80425	15.0432	6.33311	0.280617	0.389711	0.420996	Q61469	sp|Q61469|LPP1_MOUSE Lipid phosphate phosphohydrolase 1 OS=Mus musculus GN=Ppap2a PE=1 SV=1	6e-07
KH.C2.781.v1.A.nonSL5-1	427	164	649	269	321	109	4.38764	2.17411	6.57044	2.76099	3.30099	1.39011	0.495508	0.420214	0.421119	Q6ZNB6	sp|Q6ZNB6|NFXL1_HUMAN NF-X1-type zinc finger protein NFXL1 OS=Homo sapiens GN=NFXL1 PE=1 SV=2	7e-86
KH.C2.1046.v1.A.SL2-1	284	77	439	143	212	72	9.91089	3.46673	15.094	4.9847	7.40399	3.1185	0.34979	0.330243	0.421192	Q9Y2Y0	sp|Q9Y2Y0|AR2BP_HUMAN ADP-ribosylation factor-like protein 2-binding protein OS=Homo sapiens GN=ARL2BP PE=1 SV=1	1e-21
KH.S435.8.v2.C.ND1-1	2568	847	2619	1011	1513	514	52.4974	22.3388	52.7503	20.6444	30.954	13.0414	0.425523	0.391362	0.421316	Q5RAX7	sp|Q5RAX7|SPF27_PONAB Pre-mRNA-splicing factor SPF27 OS=Pongo abelii GN=BCAS2 PE=2 SV=1	2e-52
KH.C11.326.v4.A.nonSL5-1	304	117	462	184	408	139	3.28668	1.63194	4.92121	1.98706	4.41447	1.86516	0.496531	0.403774	0.422511	Q8TAM2	sp|Q8TAM2|TTC8_HUMAN Tetratricopeptide repeat protein 8 OS=Homo sapiens GN=TTC8 PE=1 SV=2	2e-126
KH.C7.317.v1.A.SL2-1	1914	650	2583	997	1159	396	45.7795	20.0575	60.8695	23.8195	27.7426	11.7555	0.438133	0.391321	0.423736	Q0P5B2	sp|Q0P5B2|METL2_BOVIN Methyltransferase-like protein 2 OS=Bos taurus GN=METTL2 PE=2 SV=1	5e-70
KH.S762.2.v1.A.nonSL2-1	261	89	223	59	289	99	17.1937	7.56405	14.4738	3.88232	19.053	8.09439	0.43993	0.268231	0.424835	B3CTX1	sp|B3CTX1|PNP_ORITI Polyribonucleotide nucleotidyltransferase OS=Orientia tsutsugamushi (strain Ikeda) GN=pnp PE=3 SV=1	2.2
KH.L37.49.v1.A.SL1-1	353	100	453	110	286	98	9.80882	3.58489	12.4019	3.05312	7.95323	3.37977	0.365477	0.246182	0.424955	Q9D844	sp|Q9D844|DNJC4_MOUSE DnaJ homolog subfamily C member 4 OS=Mus musculus GN=Dnajc4 PE=2 SV=2	0.0004
KH.C10.563.v1.A.SL1-1	2957	314	4851	1211	912	313	43.4518	5.95279	70.2319	17.775	13.4118	5.70847	0.136998	0.25309	0.425631	Q9UJV9	sp|Q9UJV9|DDX41_HUMAN Probable ATP-dependent RNA helicase DDX41 OS=Homo sapiens GN=DDX41 PE=1 SV=2	1e-152
KH.C9.505.v1.A.SL1-1	4671	1418	7103	2193	2965	1019	78.0852	30.5823	116.99	36.619	49.6043	21.1423	0.391652	0.313011	0.426219	O43172	sp|O43172|PRP4_HUMAN U4/U6 small nuclear ribonucleoprotein Prp4 OS=Homo sapiens GN=PRPF4 PE=1 SV=2	8e-113
KH.L141.44.v2.A.SL1-2	2600	527	3343	1463	1570	541	52.7699	13.7993	66.8492	29.6597	31.8896	13.6279	0.2615	0.443681	0.427347	P23121	sp|P23121|NIFU_AZOCH Nitrogen fixation protein NifU OS=Azotobacter chroococcum mcd 1 GN=nifU PE=3 SV=1	5.8
KH.C14.228.v1.A.SL3-1	227	53	247	78	148	51	6.55363	1.97409	7.02586	2.24936	4.27616	1.82745	0.30122	0.320155	0.427358	Q9NQM4	sp|Q9NQM4|PIHD3_HUMAN Protein PIH1D3 OS=Homo sapiens GN=PIH1D3 PE=2 SV=1	7e-11
KH.C4.741.v1.A.nonSL4-1	814	247	985	379	952	329	13.013	5.09429	15.5144	6.05202	15.2309	6.52781	0.391478	0.390091	0.42859	P51159	sp|P51159|RB27A_HUMAN Ras-related protein Rab-27A OS=Homo sapiens GN=RAB27A PE=1 SV=3	4e-63
KH.C3.340.v1.A.nonSL2-1	2741	820	2707	1109	2949	1021	39.7889	15.3568	38.7157	16.0803	42.8413	18.3949	0.385957	0.415342	0.429373	A5PLL7	sp|A5PLL7|TM189_HUMAN Transmembrane protein 189 OS=Homo sapiens GN=TMEM189 PE=1 SV=3	1e-48
KH.C11.231.v1.C.nonSL3-1	458	118	520	97	127	44	10.3195	3.43012	11.5436	2.1831	2.86373	1.23045	0.332392	0.189117	0.429667	Q6P5J6	sp|Q6P5J6|LRC42_DANRE Leucine-rich repeat-containing protein 42 OS=Danio rerio GN=lrrc42 PE=2 SV=1	0.046
KH.C7.376.v1.A.SL1-1	272	60	373	117	242	84	5.57146	1.58557	7.52758	2.39384	4.96079	2.13549	0.284588	0.318009	0.430474	Q5F477	sp|Q5F477|CB043_CHICK UPF0554 protein C2orf43 homolog OS=Gallus gallus GN=RCJMB04_2g19 PE=2 SV=2	5e-11
KH.C14.222.v1.B.SL1-1	5295	1006	6045	2468	2350	816	50.2567	12.3186	56.529	23.3982	22.3219	9.61252	0.245113	0.413915	0.430631	Q96NR3	sp|Q96NR3|PTHD1_HUMAN Patched domain-containing protein 1 OS=Homo sapiens GN=PTCHD1 PE=2 SV=2	0.32
KH.C11.440.v1.R.ND1-1	590	219	560	161	279	97	25.5861	12.2527	23.927	6.97409	12.1086	5.22088	0.47888	0.291474	0.431172	Q184H7	sp|Q184H7|UPPP2_CLOD6 Undecaprenyl-diphosphatase 2 OS=Clostridium difficile (strain 630) GN=uppP2 PE=3 SV=1	2
KH.C8.461.v1.A.ND1-1	189	67	227	68	204	71	2.46299	1.12645	2.91457	0.885155	2.66052	1.14836	0.457349	0.303701	0.43163	Q54P78	sp|Q54P78|4CL2_DICDI Probable 4-coumarate--CoA ligase 2 OS=Dictyostelium discoideum GN=4cl2 PE=3 SV=1	2e-33
KH.C1.424.v1.A.nonSL2-1	935	299	948	395	448	156	24.0071	9.90452	23.9819	10.1306	11.5118	4.97132	0.412567	0.422427	0.431847	Q5PPZ5	sp|Q5PPZ5|BIN3_XENLA Bridging integrator 3 homolog OS=Xenopus laevis GN=bin3 PE=2 SV=1	4e-16
KH.C12.342.v1.R.ND1-1	343	101	462	116	109	38	3.71219	1.41024	4.92635	1.25402	1.18059	0.510433	0.379893	0.254553	0.432355	Q5RFG8	sp|Q5RFG8|UBE3D_PONAB E3 ubiquitin-protein ligase E3D OS=Pongo abelii GN=UBE3D PE=2 SV=1	0.21
KH.C13.98.v2.A.SL2-1	455	66	361	71	229	80	7.84671	1.46843	6.13381	1.22305	3.95228	1.71232	0.18714	0.199395	0.433249	B6IRS0	sp|B6IRS0|RS8_RHOCS 30S ribosomal protein S8 OS=Rhodospirillum centenum (strain ATCC 51521 / SW) GN=rpsH PE=3 SV=1	0.4
KH.L116.26.v1.A.SL1-2	1511	175	1919	471	1186	415	36.8202	5.50166	46.0726	11.4644	28.9229	12.5513	0.14942	0.248833	0.433957	A8DZE7	sp|A8DZE7|D42E1_DANRE Short-chain dehydrogenase/reductase family 42E member 1 OS=Danio rerio GN=sdr42e1 PE=2 SV=1	4e-43
KH.L141.40.v1.A.SL1-1	1185	185	1374	252	1016	356	20.8641	4.2023	23.835	4.43191	17.9024	7.77947	0.201413	0.185941	0.43455	Q5M8F9	sp|Q5M8F9|ALKMO_XENTR Alkylglycerol monooxygenase OS=Xenopus tropicalis GN=agmo PE=2 SV=1	1e-72
KH.C8.456.v1.R.ND1-1	639	144	1085	299	328	115	5.56239	1.61718	9.30544	2.5998	2.85739	1.24245	0.290734	0.279386	0.434818	Q6DEY8	sp|Q6DEY8|TBC31_XENTR TBC1 domain family member 31 OS=Xenopus tropicalis GN=tbc1d31 PE=2 SV=1	9e-179
KH.C3.545.v3.C.SL1-1	887	200	984	256	641	225	13.79	4.0115	15.0724	3.97549	9.97322	4.34154	0.290898	0.263759	0.435319	O60909	sp|O60909|B4GT2_HUMAN Beta-1,4-galactosyltransferase 2 OS=Homo sapiens GN=B4GALT2 PE=1 SV=1	3e-40
KH.S1399.1.v1.A.ND1-2	1324	210	1440	525	1005	353	22.241	4.55113	23.8328	8.80915	16.8953	7.35968	0.204628	0.369623	0.435604	Q29467	sp|Q29467|I5P1_CANFA Type I inositol 1,4,5-trisphosphate 5-phosphatase OS=Canis familiaris GN=INPP5A PE=2 SV=1	2e-22
KH.C14.275.v1.A.SL1-1	1092	414	1219	423	757	266	14.0539	6.87401	15.457	5.43781	9.75004	4.24889	0.489116	0.351803	0.435782	Q803I8	sp|Q803I8|SYVN1_DANRE E3 ubiquitin-protein ligase synoviolin OS=Danio rerio GN=syvn1 PE=2 SV=2	2e-91
KH.L116.12.v2.A.SL1-1	2725	692	3567	1232	3505	1234	25.7461	8.43499	33.2043	11.6269	33.1412	14.4703	0.327623	0.350163	0.436627	Q8BZZ3	sp|Q8BZZ3|WWP1_MOUSE NEDD4-like E3 ubiquitin-protein ligase WWP1 OS=Mus musculus GN=Wwp1 PE=1 SV=2	0
KH.C2.688.v1.A.SL1-1	2925	781	4289	1024	1303	459	51.8228	17.8517	74.8682	18.1219	23.1033	10.0931	0.344476	0.242051	0.436869	0	0	0
KH.C4.19.v1.A.nonSL2-1	868	317	1065	356	454	160	16.7948	7.91316	20.3026	6.88042	8.79119	3.84233	0.471166	0.338893	0.437066	F7A355	sp|F7A355|TRM5_CIOIN tRNA (guanine(37)-N1)-methyltransferase OS=Ciona intestinalis PE=3 SV=1	0
KH.C1.371.v1.A.nonSL4-1	280	105	281	99	278	98	7.66393	3.70781	7.57786	2.70669	7.61507	3.32919	0.4838	0.357183	0.437184	Q8BHA3	sp|Q8BHA3|DTD2_MOUSE Probable D-tyrosyl-tRNA(Tyr) deacylase 2 OS=Mus musculus GN=Dtd2 PE=2 SV=1	8e-31
KH.C9.145.v2.A.ND2-1	475	125	426	113	156	55	13.7647	4.67323	12.1627	3.27084	4.5241	1.97813	0.339509	0.268925	0.437242	Q7UFZ7	sp|Q7UFZ7|HEMH_RHOBA Ferrochelatase OS=Rhodopirellula baltica (strain SH1) GN=hemH PE=3 SV=1	0.78
KH.C2.281.v1.A.ND1-1	816	183	863	144	207	73	16.9489	4.90383	17.6607	2.98759	4.30285	1.88188	0.289331	0.169166	0.437357	Q6YR34	sp|Q6YR34|SYI_ONYPE Isoleucine--tRNA ligase OS=Onion yellows phytoplasma (strain OY-M) GN=ileS PE=3 SV=1	1.1
KH.S546.7.v2.A.SL1-1	698	152	876	261	550	194	8.57164	2.40817	10.5989	3.20153	6.75937	2.95685	0.280946	0.302064	0.437444	Q9Y305	sp|Q9Y305|ACOT9_HUMAN Acyl-coenzyme A thioesterase 9, mitochondrial OS=Homo sapiens GN=ACOT9 PE=1 SV=2	2e-59
KH.C9.678.v1.A.SL2-1	194	64	260	113	343	121	3.95812	1.68462	5.22645	2.3029	7.00353	3.06402	0.425611	0.440623	0.437497	O43826	sp|O43826|G6PT1_HUMAN Glucose-6-phosphate translocase OS=Homo sapiens GN=SLC37A4 PE=1 SV=1	2e-34
KH.C10.311.v1.A.SL1-1	1703	626	2213	874	2337	827	17.8411	8.46091	22.8421	9.14594	24.502	10.7531	0.474236	0.400399	0.438864	Q16975	sp|Q16975|KPC2_APLCA Calcium-independent protein kinase C OS=Aplysia californica GN=PRKC2 PE=1 SV=1	8e-86
KH.C2.1081.v1.A.SL1-1	1276	381	1715	586	1176	417	21.0369	8.10382	27.8574	9.65021	19.4032	8.53268	0.38522	0.346414	0.439756	Q803F5	sp|Q803F5|APMAP_DANRE Adipocyte plasma membrane-associated protein OS=Danio rerio GN=apmap PE=2 SV=1	1e-06
KH.C3.722.v1.A.SL2-1	138	16	166	56	155	55	2.84356	0.425341	3.37006	1.1526	3.19632	1.40658	0.149581	0.342013	0.440062	0	0	0
KH.C4.546.v2.A.ND1-1	2220	520	2510	664	1095	389	19.341	5.84471	21.545	5.77833	9.54718	4.20624	0.302193	0.268199	0.440574	Q9VH19	sp|Q9VH19|LMLN_DROME Leishmanolysin-like peptidase OS=Drosophila melanogaster GN=Invadolysin PE=2 SV=2	5e-10
KH.C11.125.v2.A.SL2-1	326	64	431	131	332	118	3.51597	0.890516	4.57985	1.41126	3.58345	1.57953	0.253278	0.308146	0.440785	Q9QUR8	sp|Q9QUR8|SEM7A_MOUSE Semaphorin-7A OS=Mus musculus GN=Sema7a PE=1 SV=1	0.003
KH.C9.314.v1.A.SL2-1	2735	970	4093	1544	2633	936	11.8014	5.39988	17.4007	6.65478	11.3701	5.01271	0.457561	0.382444	0.440868	O75165	sp|O75165|DJC13_HUMAN DnaJ homolog subfamily C member 13 OS=Homo sapiens GN=DNAJC13 PE=1 SV=5	0
KH.C1.1236.v1.A.SL2-1	2008	557	2251	910	1146	408	39.7176	14.2138	43.8674	17.9792	22.685	10.0161	0.35787	0.409853	0.441529	Q63486	sp|Q63486|RRAGA_RAT Ras-related GTP-binding protein A OS=Rattus norvegicus GN=Rraga PE=1 SV=1	8e-123
KH.C1.505.v3.A.ND2-1	264	94	428	173	379	135	5.84667	2.68576	9.33889	3.82701	8.40001	3.71071	0.459365	0.409793	0.441751	O70589	sp|O70589|CSKP_MOUSE Peripheral plasma membrane protein CASK OS=Mus musculus GN=Cask PE=1 SV=2	2e-115
KH.C8.402.v1.A.SL1-2	139	47	198	82	129	46	7.19138	3.13711	10.0927	4.2376	6.67917	2.95375	0.436232	0.419866	0.442233	Q5T3U5	sp|Q5T3U5|MRP7_HUMAN Multidrug resistance-associated protein 7 OS=Homo sapiens GN=ABCC10 PE=1 SV=1	4.2
KH.C6.57.v1.A.SL3-1	528	95	523	138	179	64	8.00071	1.85717	7.80805	2.08873	2.71446	1.20363	0.232126	0.26751	0.443415	Q9H3S4	sp|Q9H3S4|TPK1_HUMAN Thiamin pyrophosphokinase 1 OS=Homo sapiens GN=TPK1 PE=1 SV=1	2e-10
KH.C3.368.v2.A.SL1-1	968	355	1014	441	1311	469	21.7476	10.2896	22.445	9.89654	29.4764	13.0776	0.473138	0.440923	0.443663	P87262	sp|P87262|RL34A_YEAST 60S ribosomal protein L34-A OS=Saccharomyces cerevisiae (strain ATCC 204508 / S288c) GN=RPL34A PE=1 SV=1	0.13
KH.C2.162.v1.A.SL2-1	2148	432	2925	713	1706	611	16.7939	4.35747	22.5314	5.5682	13.3485	5.92893	0.259468	0.24713	0.444166	Q8JSZ3	sp|Q8JSZ3|GP_CCHFI Envelope glycoprotein OS=Crimean-Congo hemorrhagic fever virus (strain Nigeria/IbAr10200/1970) GN=GP PE=3 SV=1	0.92
KH.L50.2.v1.A.SL2-1	459	75	476	130	282	101	7.07585	1.49163	7.22969	2.00179	4.35062	1.93244	0.210806	0.276885	0.444177	0	0	0
KH.L22.11.v1.A.SL2-1	769	265	867	281	469	168	30.039	13.3549	33.3676	10.9641	18.3344	8.14493	0.444584	0.328586	0.444242	Q4V7V8	sp|Q4V7V8|ADAT2_XENLA tRNA-specific adenosine deaminase 2 OS=Xenopus laevis GN=adat2 PE=2 SV=1	1e-28
KH.C10.355.v2.A.SL2-1	1157	306	1633	245	723	259	13.5807	4.63389	18.8853	2.87253	8.49305	3.77319	0.341211	0.152105	0.444268	Q3MHJ7	sp|Q3MHJ7|EEPD1_BOVIN Endonuclease/exonuclease/phosphatase family domain-containing protein 1 OS=Bos taurus GN=EEPD1 PE=2 SV=1	1e-34
KH.C10.107.v1.A.SL2-1	345	91	240	51	173	62	10.6211	3.61432	7.27961	1.5683	5.33006	2.36898	0.340296	0.215438	0.444456	Q9NPI0	sp|Q9NPI0|TM138_HUMAN Transmembrane protein 138 OS=Homo sapiens GN=TMEM138 PE=1 SV=1	7e-08
KH.C3.114.v1.A.SL1-1	2503	674	2595	533	746	268	58.871	20.452	60.1346	12.5221	17.5596	7.82338	0.347403	0.208234	0.445532	Q640V9	sp|Q640V9|TATD1_XENLA Putative deoxyribonuclease TATDN1 OS=Xenopus laevis GN=tatdn1 PE=2 SV=1	8e-79
KH.C1.377.v1.R.ND1-1	368	112	574	130	178	64	4.61204	1.81091	7.08767	1.62741	2.23255	0.995506	0.392649	0.229612	0.445906	Q5ZLS2	sp|Q5ZLS2|EDC3_CHICK Enhancer of mRNA-decapping protein 3 OS=Gallus gallus GN=EDC3 PE=2 SV=1	3e-37
KH.S389.3.v4.A.ND1-1	187	45	219	78	111	40	4.60009	1.42814	5.30781	1.91659	2.73265	1.22125	0.31046	0.361088	0.44691	Q8K4J0	sp|Q8K4J0|DCR1C_MOUSE Protein artemis OS=Mus musculus GN=Dclre1c PE=2 SV=2	6e-22
KH.C2.310.v1.A.ND1-1	1496	475	1961	464	1566	565	26.7027	10.9384	34.4864	8.27277	27.9738	12.5167	0.409634	0.239885	0.447445	Q08DE2	sp|Q08DE2|T185B_BOVIN Transmembrane protein 185B OS=Bos taurus GN=TMEM185B PE=2 SV=1	5e-52
KH.C8.630.v1.A.nonSL2-1	531	172	651	211	388	140	13.9449	5.82751	16.8441	5.53492	10.1974	4.56318	0.417896	0.328597	0.447486	Q4V7X9	sp|Q4V7X9|HAKAI_XENLA E3 ubiquitin-protein ligase Hakai OS=Xenopus laevis GN=cbll1 PE=2 SV=1	1e-21
KH.C12.364.v1.A.SL2-1	1370	416	2398	714	1175	424	11.4021	4.46676	19.6635	5.93571	9.78675	4.37976	0.391748	0.301864	0.447519	Q9WU70	sp|Q9WU70|STXB5_RAT Syntaxin-binding protein 5 OS=Rattus norvegicus GN=Stxbp5 PE=1 SV=1	7e-63
KH.S555.6.v1.A.SL1-1	1476	283	1879	653	1048	379	22.8216	5.64522	28.6242	10.0851	16.2165	7.27307	0.247363	0.352329	0.448499	Q1JQC6	sp|Q1JQC6|SIR4_BOVIN NAD-dependent protein deacetylase sirtuin-4 OS=Bos taurus GN=SIRT4 PE=2 SV=1	1e-47
KH.C9.105.v1.R.ND1-1	678	77	719	166	500	181	10.0965	1.47934	10.5491	2.46921	7.45156	3.34533	0.146519	0.234068	0.448944	Q2MV58	sp|Q2MV58|TECT1_HUMAN Tectonic-1 OS=Homo sapiens GN=TCTN1 PE=2 SV=2	0.012
KH.L30.4.v1.A.SL2-1	464	117	557	233	348	126	8.70698	2.8325	10.298	4.36731	6.53528	2.93453	0.325314	0.424095	0.449029	Q8CCB5	sp|Q8CCB5|MET24_MOUSE Methyltransferase-like protein 24 OS=Mus musculus GN=Mettl24 PE=2 SV=1	0.0004
KH.C9.301.v1.A.SL1-1	3688	1084	3606	792	2318	840	57.9452	21.973	55.8211	12.4297	36.4481	16.3804	0.379204	0.22267	0.449417	Q5R6J3	sp|Q5R6J3|S35F5_PONAB Solute carrier family 35 member F5 OS=Pongo abelii GN=SLC35F5 PE=2 SV=1	2e-56
KH.C4.704.v1.A.SL1-1	147	14	113	11	190	69	7.96301	0.978414	6.03094	0.595198	10.3003	4.63904	0.12287	0.0986908	0.45038	P30555	sp|P30555|AGTR1_PIG Type-1 angiotensin II receptor OS=Sus scrofa GN=AGTR1 PE=2 SV=1	7e-10
KH.L130.11.v1.A.nonSL4-1	609	193	771	311	453	165	13.6624	5.586	17.0416	6.96912	10.1705	4.59422	0.40886	0.408948	0.45172	P97694	sp|P97694|CYH1_RAT Cytohesin-1 OS=Rattus norvegicus GN=Cyth1 PE=1 SV=1	1e-109
KH.L156.5.v1.A.SL3-1	1016	376	685	251	527	192	48.9027	23.3487	32.4845	12.0676	25.3855	11.4699	0.477451	0.371489	0.451829	Q9IB61	sp|Q9IB61|BLCAP_DANRE Bladder cancer-associated protein OS=Danio rerio GN=blcap PE=3 SV=1	3e-08
KH.C9.11.v2.A.nonSL3-1	295	67	334	140	236	86	5.63084	1.64991	6.28122	2.66924	4.50815	2.03736	0.293013	0.424956	0.451929	Q9UGC7	sp|Q9UGC7|RF1ML_HUMAN Peptide chain release factor 1-like, mitochondrial OS=Homo sapiens GN=MTRF1L PE=1 SV=1	4e-24
KH.L133.6.v1.A.ND1-1	1264	388	1283	391	933	340	12.3089	4.8746	12.3097	3.80328	9.09265	4.10933	0.396022	0.308967	0.45194	P00529	sp|P00529|ROS_AVISU Tyrosine-protein kinase transforming protein ros OS=UR2 sarcoma virus GN=V-ROS PE=3 SV=1	3e-60
KH.C3.641.v1.C.SL1-1	798	144	604	67	518	189	22.9111	5.33385	17.0855	1.92144	14.8836	6.73479	0.232806	0.112461	0.452497	Q6FW70	sp|Q6FW70|PFA3_CANGA Palmitoyltransferase PFA3 OS=Candida glabrata (strain ATCC 2001 / CBS 138 / JCM 3761 / NBRC 0622 / NRRL Y-65) GN=PFA3 PE=3 SV=1	2e-09
KH.S369.6.v1.C.SL2-1	952	340	1251	397	1133	414	17.4741	8.05141	22.6236	7.27877	20.8125	9.43144	0.460762	0.321733	0.453162	Q8R059	sp|Q8R059|GALE_MOUSE UDP-glucose 4-epimerase OS=Mus musculus GN=Gale PE=2 SV=1	4e-87
KH.C10.480.v1.A.SL1-1	5035	773	5626	1344	2944	1076	48.3946	9.58543	53.2775	12.9035	28.3186	12.836	0.198068	0.242193	0.453271	A0JMD4	sp|A0JMD4|TPC2_DANRE Two pore calcium channel protein 2 OS=Danio rerio GN=tpcn2 PE=2 SV=1	1e-26
KH.C8.632.v1.A.nonSL4-1	891	330	1177	396	881	322	13.0928	6.25612	17.0404	5.81247	12.9559	5.87261	0.477827	0.3411	0.453277	Q8WU17	sp|Q8WU17|RN139_HUMAN E3 ubiquitin-protein ligase RNF139 OS=Homo sapiens GN=RNF139 PE=1 SV=1	2e-38
KH.C2.121.v1.A.ND1-1	783	223	1019	279	465	170	11.7275	4.30907	15.0371	4.17405	6.97001	3.16018	0.367432	0.277583	0.453398	P62994	sp|P62994|GRB2_RAT Growth factor receptor-bound protein 2 OS=Rattus norvegicus GN=Grb2 PE=1 SV=1	4e-08
KH.C9.791.v1.A.SL2-1	1588	320	3139	1112	1803	660	12.3627	3.21402	24.077	8.64724	14.0474	6.37715	0.259976	0.35915	0.453975	Q00651	sp|Q00651|ITA4_MOUSE Integrin alpha-4 OS=Mus musculus GN=Itga4 PE=1 SV=1	4e-10
KH.C7.356.v1.A.SL1-1	2822	821	1763	406	1685	617	88.3649	33.1666	54.3903	12.6987	52.803	23.9788	0.375336	0.233473	0.454118	Q9CR60	sp|Q9CR60|GOT1B_MOUSE Vesicle transport protein GOT1B OS=Mus musculus GN=Golt1b PE=2 SV=1	5e-18
KH.C14.196.v1.A.SL2-1	194	47	266	59	101	37	6.03821	1.88729	8.15708	1.83429	3.14603	1.42931	0.312558	0.224871	0.454322	Q3KPT0	sp|Q3KPT0|CC169_XENLA Coiled-coil domain-containing protein 169 OS=Xenopus laevis GN=ccdc169 PE=2 SV=2	8e-09
KH.C4.37.v1.A.SL1-1	499	155	716	153	570	209	13.3756	5.36019	18.9092	4.09651	15.2906	6.95311	0.400743	0.216641	0.454731	Q9BSG0	sp|Q9BSG0|PADC1_HUMAN Protease-associated domain-containing protein 1 OS=Homo sapiens GN=PRADC1 PE=1 SV=1	6e-12
KH.C7.613.v1.A.SL1-1	1604	344	1886	547	1517	557	58.6066	16.2157	67.8939	19.9636	55.4707	25.259	0.276687	0.294041	0.455358	Q9WUD8	sp|Q9WUD8|FAIM1_MOUSE Fas apoptotic inhibitory molecule 1 OS=Mus musculus GN=Faim PE=1 SV=1	1e-53
KH.S696.6.v1.A.SL1-1	962	326	1117	473	1524	560	21.5661	9.42861	24.6715	10.5917	34.1913	15.5813	0.437197	0.429309	0.455708	Q9R0N9	sp|Q9R0N9|SYT9_MOUSE Synaptotagmin-9 OS=Mus musculus GN=Syt9 PE=1 SV=2	0.0001
KH.C1.480.v1.R.ND1-1	202	26	214	43	155	57	6.29982	1.04613	6.57563	1.33954	4.83776	2.20633	0.166057	0.203712	0.456065	Q5R796	sp|Q5R796|FBX36_PONAB F-box only protein 36 OS=Pongo abelii GN=FBXO36 PE=2 SV=1	7e-25
KH.L164.15.v1.A.SL2-1	1380	417	1644	702	2123	782	35.6686	13.9052	41.8653	18.1239	54.9151	25.086	0.389844	0.43291	0.456815	Q8N2U9	sp|Q8N2U9|PQLC1_HUMAN PQ-loop repeat-containing protein 1 OS=Homo sapiens GN=PQLC1 PE=2 SV=1	2e-58
KH.S389.6.v1.A.SL2-1	1705	603	1317	242	809	298	81.0623	36.9867	61.6917	11.4926	38.4927	17.5845	0.456276	0.186291	0.456826	Q5XK67	sp|Q5XK67|RPAC2_XENLA DNA-directed RNA polymerases I and III subunit RPAC2 OS=Xenopus laevis GN=polr1d PE=3 SV=1	4e-25
KH.S256.13.v1.A.SL2-1	1289	482	1971	761	982	362	20.5854	9.93088	31.0127	12.1395	15.6947	7.17519	0.482424	0.391436	0.457173	Q96AJ1	sp|Q96AJ1|CLUA1_HUMAN Clusterin-associated protein 1 OS=Homo sapiens GN=CLUAP1 PE=1 SV=4	1e-65
KH.C5.541.v2.A.SL2-2	915	199	901	309	501	185	15.5553	4.36461	15.0914	5.24718	8.52377	3.90345	0.280586	0.347693	0.457949	Q8R3H7	sp|Q8R3H7|HS2ST_MOUSE Heparan sulfate 2-O-sulfotransferase 1 OS=Mus musculus GN=Hs2st1 PE=1 SV=2	1e-56
KH.C9.613.v1.A.SL2-1	685	196	655	153	341	126	16.627	6.13781	15.6643	3.70957	8.28348	3.79588	0.369147	0.236817	0.458247	0	0	0
KH.L10.13.v1.A.SL1-1	16736	3348	18060	7897	15198	5625	433.653	111.921	461.057	204.391	394.106	180.897	0.258088	0.443309	0.459007	0	0	0
KH.L18.138.v1.A.SL1-1	1458	264	2404	1015	659	244	9.44864	2.20724	15.3494	6.57032	4.27398	1.96255	0.233604	0.42805	0.459185	Q8NDG6	sp|Q8NDG6|TDRD9_HUMAN Putative ATP-dependent RNA helicase TDRD9 OS=Homo sapiens GN=TDRD9 PE=2 SV=3	4e-88
KH.C7.506.v1.A.nonSL7-1	149	37	168	48	189	70	2.24465	0.719115	2.49355	0.722292	2.84944	1.30882	0.320369	0.289664	0.459324	Q6GPQ3	sp|Q6GPQ3|MFSD8_XENLA Major facilitator superfamily domain-containing protein 8 OS=Xenopus laevis GN=mfsd8 PE=2 SV=1	0.64
KH.C10.606.v1.A.ND1-1	1734	138	2290	452	270	100	27.607	2.83454	35.9213	7.18815	4.30199	1.97601	0.102675	0.200108	0.459324	Q5DU41	sp|Q5DU41|LRC8B_MOUSE Leucine-rich repeat-containing protein 8B OS=Mus musculus GN=Lrrc8b PE=2 SV=2	4.3
KH.C8.283.v1.A.SL1-1	2332	754	3238	1088	2932	1086	29.0158	12.1035	39.6944	13.5221	36.5094	16.7708	0.417136	0.340655	0.459356	Q566C7	sp|Q566C7|NUDT3_RAT Diphosphoinositol polyphosphate phosphohydrolase 1 OS=Rattus norvegicus GN=Nudt3 PE=1 SV=1	3e-30
KH.C7.299.v2.A.SL1-1	2153	810	3576	1326	2449	909	21.9707	10.664	35.9537	13.5161	25.0106	11.5128	0.485373	0.375931	0.460319	Q8K4M9	sp|Q8K4M9|OSBL1_RAT Oxysterol-binding protein-related protein 1 OS=Rattus norvegicus GN=Osbpl1a PE=1 SV=1	2e-60
KH.C8.623.v1.R.ND1-1	672	117	764	151	258	96	10.2527	2.30297	11.4844	2.3012	3.93934	1.81785	0.224621	0.200376	0.461461	Q8R4F0	sp|Q8R4F0|MCLN3_MOUSE Mucolipin-3 OS=Mus musculus GN=Mcoln3 PE=1 SV=1	5e-40
KH.C2.1132.v1.A.SL1-1	416	31	634	79	239	89	5.90099	0.567319	8.86068	1.11935	3.39285	1.5669	0.0961397	0.126328	0.461823	O70432	sp|O70432|ADRB3_MERUN Beta-3 adrenergic receptor (Fragment) OS=Meriones unguiculatus GN=ADRB3 PE=2 SV=1	0.33
KH.L138.2.v1.R.ND1-1	102	37	158	48	150	56	1.32812	0.621547	2.02694	0.624292	1.95463	0.904992	0.467989	0.307997	0.462999	Q6IE24	sp|Q6IE24|UBP54_RAT Inactive ubiquitin carboxyl-terminal hydrolase 54 OS=Rattus norvegicus GN=Usp54 PE=2 SV=2	1e-80
KH.C11.685.v1.A.SL1-1	2201	514	2427	491	947	354	41.4269	12.4813	45.0068	9.23108	17.8381	8.26959	0.301285	0.205104	0.463593	Q6AYM4	sp|Q6AYM4|DPCD_RAT Protein DPCD OS=Rattus norvegicus GN=Dpcd PE=2 SV=2	9e-29
KH.C1.284.v1.A.SL1-1	4430	1511	3785	710	2320	868	143.335	63.0736	120.659	22.9465	75.1229	34.8568	0.440043	0.190176	0.463997	Q5BJW3	sp|Q5BJW3|TX261_RAT Protein TEX261 OS=Rattus norvegicus GN=Tex261 PE=2 SV=1	2e-38
KH.C1.454.v2.A.nonSL9-1	255	37	322	48	155	58	3.81197	0.713584	4.74254	0.716735	2.31887	1.07611	0.187196	0.151129	0.464066	Q90ZB9	sp|Q90ZB9|STAR3_SALFO StAR-related lipid transfer protein 3 (Fragment) OS=Salvelinus fontinalis GN=stard3 PE=2 SV=1	1e-15
KH.C3.672.v1.B.nonSL3-1	707	149	941	189	817	306	11.0413	3.00207	14.4789	2.9483	12.769	5.93118	0.271895	0.203627	0.464497	Q6DEL1	sp|Q6DEL1|S38A7_DANRE Putative sodium-coupled neutral amino acid transporter 7 OS=Danio rerio GN=slc38a7 PE=2 SV=1	8e-47
KH.S460.5.v1.A.SL2-1	1630	474	1698	555	1513	567	41.9906	15.7535	43.0972	14.2813	39.0067	18.1287	0.375167	0.331373	0.464759	P24008	sp|P24008|S5A1_RAT 3-oxo-5-alpha-steroid 4-dehydrogenase 1 OS=Rattus norvegicus GN=Srd5a1 PE=1 SV=2	5e-34
KH.C4.60.v1.A.ND1-1	895	116	895	73	568	213	23.3856	3.91037	23.0406	1.90527	14.8528	6.90754	0.167213	0.0826918	0.465066	Q3UJD6	sp|Q3UJD6|UBP19_MOUSE Ubiquitin carboxyl-terminal hydrolase 19 OS=Mus musculus GN=Usp19 PE=2 SV=1	2e-05
KH.C8.372.v1.A.SL2-1	470	124	706	271	594	223	4.20185	1.43021	6.21861	2.42003	5.31452	2.47438	0.340375	0.389159	0.465588	Q5W7F1	sp|Q5W7F1|ASAH2_DANRE Neutral ceramidase OS=Danio rerio GN=asah2 PE=1 SV=1	4e-86
KH.C10.522.v1.A.SL1-1	1949	748	1954	517	852	321	50.8829	25.194	50.261	13.4822	22.2605	10.4012	0.495136	0.268243	0.467249	Q5F457	sp|Q5F457|WBP4_CHICK WW domain-binding protein 4 OS=Gallus gallus GN=WBP4 PE=2 SV=1	1e-13
KH.S1214.2.v1.A.SL1-1	1511	459	1356	512	838	316	25.4786	9.98523	22.5277	8.62363	14.1413	6.61328	0.391907	0.382801	0.467656	Q6DE15	sp|Q6DE15|B3G5B_XENLA Lactosylceramide 1,3-N-acetyl-beta-D-glucosaminyltransferase B OS=Xenopus laevis GN=b3gnt5-b PE=2 SV=1	1e-24
KH.C9.768.v1.R.ND1-1	445	93	612	267	665	251	6.51752	1.75727	8.8312	3.90609	9.74718	4.56262	0.269623	0.442305	0.468097	Q8VCH6	sp|Q8VCH6|DHC24_MOUSE Delta(24)-sterol reductase OS=Mus musculus GN=Dhcr24 PE=2 SV=1	1e-39
KH.L20.15.v1.A.SL1-1	809	290	883	228	837	316	23.0355	10.6532	24.7717	6.48475	23.8512	11.1675	0.46247	0.26178	0.468215	Q9CQR4	sp|Q9CQR4|ACO13_MOUSE Acyl-coenzyme A thioesterase 13 OS=Mus musculus GN=Acot13 PE=1 SV=1	8e-16
KH.C11.37.v1.A.ND1-1	903	330	1204	443	1520	575	7.88696	3.71852	10.3608	3.86487	13.2862	6.23317	0.471477	0.373027	0.469146	Q505D1	sp|Q505D1|ANR28_MOUSE Serine/threonine-protein phosphatase 6 regulatory ankyrin repeat subunit A OS=Mus musculus GN=Ankrd28 PE=1 SV=1	4e-85
KH.C10.508.v1.A.SL1-1	2535	371	3288	939	951	360	65.2504	12.3201	83.3841	24.1424	24.4975	11.5008	0.188812	0.289532	0.469467	Q8JIM3	sp|Q8JIM3|GHRP_LITCT Growth hormone-releasing peptides OS=Lithobates catesbeiana PE=1 SV=1	1.6
KH.C10.582.v1.A.SL2-1	144	52	134	53	140	53	5.3816	2.50719	4.93401	1.97849	5.23615	2.45835	0.465881	0.40099	0.469495	Q71R50	sp|Q71R50|DHR11_CHICK Dehydrogenase/reductase SDR family member 11 OS=Gallus gallus GN=DHRS11 PE=2 SV=1	2e-46
KH.C3.376.v1.A.SL4-1	853	303	891	308	1082	410	10.5083	4.8157	10.8145	3.79003	13.3397	6.26881	0.458277	0.350458	0.469937	P80385	sp|P80385|AAKG1_RAT 5'-AMP-activated protein kinase subunit gamma-1 OS=Rattus norvegicus GN=Prkag1 PE=1 SV=3	2e-71
KH.L87.9.v1.A.SL1-1	2455	528	2063	635	1320	501	50.0557	13.889	41.4427	12.9326	26.9347	12.6782	0.27747	0.312059	0.470703	Q53GQ0	sp|Q53GQ0|DHB12_HUMAN Estradiol 17-beta-dehydrogenase 12 OS=Homo sapiens GN=HSD17B12 PE=1 SV=2	5e-41
KH.C8.670.v1.R.ND1-1	412	124	640	226	474	180	5.36008	2.08128	8.20353	2.93692	6.17146	2.90647	0.388292	0.358007	0.470953	P54802	sp|P54802|ANAG_HUMAN Alpha-N-acetylglucosaminidase OS=Homo sapiens GN=NAGLU PE=1 SV=2	5e-87
KH.C10.18.v1.B.ND1-1	618	99	957	180	355	135	8.04012	1.66167	12.2668	2.33914	4.62209	2.17985	0.206672	0.190688	0.471616	Q9WUL6	sp|Q9WUL6|M3K14_MOUSE Mitogen-activated protein kinase kinase kinase 14 OS=Mus musculus GN=Map3k14 PE=1 SV=1	3e-07
KH.C1.606.v1.A.SL2-1	2130	542	2210	395	2011	765	31.0499	10.1933	31.741	5.75158	29.3379	13.8408	0.328287	0.181204	0.471773	Q15119	sp|Q15119|PDK2_HUMAN [Pyruvate dehydrogenase (acetyl-transferring)] kinase isozyme 2, mitochondrial OS=Homo sapiens GN=PDK2 PE=1 SV=2	6e-68
KH.C8.773.v1.A.SL1-1	1613	468	2272	823	904	344	20.7591	7.77061	28.8091	10.58	11.6434	5.49481	0.374322	0.367243	0.471925	Q96BP3	sp|Q96BP3|PPWD1_HUMAN Peptidylprolyl isomerase domain and WD repeat-containing protein 1 OS=Homo sapiens GN=PPWD1 PE=1 SV=1	3e-153
KH.C3.284.v1.A.ND1-1	1496	434	2729	1192	1339	510	23.3867	8.75309	42.0327	18.6133	20.9485	9.89524	0.374276	0.442828	0.47236	Q9QZN1	sp|Q9QZN1|FXL17_MOUSE F-box/LRR-repeat protein 17 OS=Mus musculus GN=Fbxl17 PE=2 SV=3	5e-13
KH.C7.36.v1.C.ND4-1	132	47	175	68	105	40	1.35951	0.624513	1.7758	0.699563	1.08227	0.511314	0.459365	0.393943	0.472448	Q76L83	sp|Q76L83|ASXL2_HUMAN Putative Polycomb group protein ASXL2 OS=Homo sapiens GN=ASXL2 PE=1 SV=1	3e-15
KH.C11.283.v1.B.SL1-1	658	165	1151	251	750	286	7.3018	2.36223	12.5842	2.78219	8.32915	3.93903	0.323514	0.221086	0.47292	Q9R1S3	sp|Q9R1S3|PIGN_MOUSE GPI ethanolamine phosphate transferase 1 OS=Mus musculus GN=Pign PE=2 SV=2	2e-101
KH.S854.5.v1.A.SL1-1	409	47	775	315	498	190	10.6958	1.58571	19.9682	8.22829	13.0333	6.16684	0.148255	0.41207	0.47316	Q3ZBF8	sp|Q3ZBF8|CERS2_BOVIN Ceramide synthase 2 OS=Bos taurus GN=CERS2 PE=2 SV=1	4e-29
KH.C5.26.v1.A.SL1-1	869	126	1176	301	482	184	12.144	2.27168	16.1918	4.20163	6.741	3.19138	0.187062	0.259491	0.473428	Q9DBE0	sp|Q9DBE0|CSAD_MOUSE Cysteine sulfinic acid decarboxylase OS=Mus musculus GN=Csad PE=2 SV=1	3e-80
KH.L18.135.v1.A.SL1-1	946	177	1279	387	403	154	14.3486	3.46359	19.1133	5.86325	6.11729	2.89906	0.241388	0.306763	0.473913	Q9ZQE6	sp|Q9ZQE6|CML1_ARATH Calmodulin-like protein 1 OS=Arabidopsis thaliana GN=CML1 PE=2 SV=1	0.83
KH.C4.364.v1.A.SL2-1	1896	625	2258	824	2243	859	34.5364	14.6877	40.5237	14.9925	40.8887	19.4201	0.425281	0.369969	0.474949	P27545	sp|P27545|CERS1_MOUSE Ceramide synthase 1 OS=Mus musculus GN=Cers1 PE=1 SV=1	4e-41
KH.C12.240.v1.A.SL1-1	673	94	987	305	339	130	5.91131	1.0652	8.54147	2.67595	2.97992	1.4172	0.180197	0.313289	0.475584	P54099	sp|P54099|DPOG1_MOUSE DNA polymerase subunit gamma-1 OS=Mus musculus GN=Polg PE=1 SV=2	1e-91
KH.C1.759.v1.A.SL1-1	587	130	1099	332	696	267	5.83131	1.66612	10.7565	3.29439	6.91946	3.29198	0.285719	0.306269	0.475757	Q6A4L1	sp|Q6A4L1|S12A8_XENLA Solute carrier family 12 member 8 OS=Xenopus laevis GN=slc12a8 PE=2 SV=1	2e-68
KH.C4.120.v2.A.ND3-1	882	206	1157	354	464	178	13.726	4.13598	17.7401	5.50286	7.22653	3.43808	0.301324	0.310193	0.475757	Q96M91	sp|Q96M91|CCD11_HUMAN Coiled-coil domain-containing protein 11 OS=Homo sapiens GN=CCDC11 PE=1 SV=2	0.26
KH.C14.618.v1.B.SL2-1	822	178	1445	630	745	286	14.8168	4.1394	25.6624	11.3431	13.4392	6.39835	0.279372	0.442013	0.476094	A5D8S5	sp|A5D8S5|SH3R1_DANRE E3 ubiquitin-protein ligase SH3RF1 OS=Danio rerio GN=sh3rf1 PE=2 SV=2	5e-27
KH.C2.400.v1.A.nonSL6-1	358	123	594	239	104	40	2.60753	1.15581	4.26264	1.73881	0.758079	0.361597	0.443258	0.407919	0.476991	Q8N3P4	sp|Q8N3P4|VPS8_HUMAN Vacuolar protein sorting-associated protein 8 homolog OS=Homo sapiens GN=VPS8 PE=1 SV=3	9e-119
KH.C4.662.v1.A.SL1-1	280	71	343	141	325	125	4.90492	1.6046	5.9199	2.46719	5.69761	2.71771	0.327141	0.416761	0.476991	Q3TD49	sp|Q3TD49|SPP2B_MOUSE Signal peptide peptidase-like 2B OS=Mus musculus GN=Sppl2b PE=2 SV=2	2e-31
KH.C10.202.v1.A.SL2-1	1397	352	1639	426	972	374	31.3857	10.2027	36.2795	9.55993	21.8543	10.4286	0.325073	0.263508	0.477187	Q9Y673	sp|Q9Y673|ALG5_HUMAN Dolichyl-phosphate beta-glucosyltransferase OS=Homo sapiens GN=ALG5 PE=1 SV=1	1e-61
KH.C14.127.v1.A.SL1-1	363	103	395	100	210	81	5.66901	2.07526	6.07777	1.55995	3.28213	1.57002	0.366071	0.256664	0.478354	Q92604	sp|Q92604|LGAT1_HUMAN Acyl-CoA:lysophosphatidylglycerol acyltransferase 1 OS=Homo sapiens GN=LPGAT1 PE=2 SV=1	5e-12
KH.C1.177.v1.A.nonSL4-1	283	46	405	132	184	71	3.22445	0.676178	4.54642	1.50228	2.09808	1.00403	0.209704	0.330431	0.478546	Q6UWJ1	sp|Q6UWJ1|TMCO3_HUMAN Transmembrane and coiled-coil domain-containing protein 3 OS=Homo sapiens GN=TMCO3 PE=2 SV=1	9e-50
KH.C12.359.v1.B.ND1-1	919	134	1416	530	557	215	20.4546	3.84782	31.0517	11.7831	12.407	5.93927	0.188115	0.379468	0.478704	Q86VE3	sp|Q86VE3|SATL1_HUMAN Spermidine/spermine N(1)-acetyltransferase-like protein 1 OS=Homo sapiens GN=SATL1 PE=2 SV=3	0.17
KH.C8.718.v1.A.SL1-1	515	124	486	194	207	80	8.54952	2.65577	7.94908	3.21695	3.43906	1.64833	0.310634	0.404695	0.479295	Q0V9F1	sp|Q0V9F1|GDPP1_XENTR GDP-D-glucose phosphorylase 1 OS=Xenopus tropicalis GN=gdpgp1 PE=2 SV=1	3e-17
KH.C2.72.v1.A.SL1-1	3183	855	4565	1749	2625	1015	29.964	10.384	42.34	16.4461	24.7302	11.859	0.346548	0.388429	0.479535	P78536	sp|P78536|ADA17_HUMAN Disintegrin and metalloproteinase domain-containing protein 17 OS=Homo sapiens GN=ADAM17 PE=1 SV=1	3e-56
KH.L57.11.v1.A.SL1-1	1160	192	1272	373	608	236	16.4397	3.51052	17.7611	5.28023	8.62332	4.15113	0.213539	0.297293	0.481384	Q3KTM2	sp|Q3KTM2|GDPD5_CHICK Glycerophosphodiester phosphodiesterase domain-containing protein 5 OS=Gallus gallus GN=GDPD5 PE=1 SV=1	9e-18
KH.C1.1065.v1.A.SL1-1	4508	1351	7152	2887	4412	1716	44.912	17.3647	70.2024	28.7299	43.9895	21.2185	0.386639	0.409243	0.482353	A0FGR8	sp|A0FGR8|ESYT2_HUMAN Extended synaptotagmin-2 OS=Homo sapiens GN=ESYT2 PE=1 SV=1	8e-33
KH.C1.1278.v1.A.nonSL4-1	635	235	660	157	449	175	13.1982	6.30148	13.5155	3.25949	9.33947	4.51437	0.477451	0.241167	0.483365	Q6PAF4	sp|Q6PAF4|NSE1_XENLA Non-structural maintenance of chromosomes element 1 homolog OS=Xenopus laevis GN=nsmce1 PE=2 SV=1	2e-12
KH.L170.18.v1.R.ND2-1	453	156	522	163	177	69	10.1847	4.5249	11.5629	3.66055	3.98253	1.92539	0.444284	0.316577	0.483458	Q0II86	sp|Q0II86|SNP29_BOVIN Synaptosomal-associated protein 29 OS=Bos taurus GN=SNAP29 PE=2 SV=1	2e-12
KH.L144.2.v7.A.SL3-1	452	101	569	117	146	57	4.61858	1.33145	5.72834	1.19417	1.493	0.722876	0.288282	0.208466	0.484178	Q6ZPK0	sp|Q6ZPK0|PF21A_MOUSE PHD finger protein 21A OS=Mus musculus GN=Phf21a PE=1 SV=2	4e-08
KH.S927.2.v1.A.SL1-1	1306	377	1884	626	586	229	24.9131	9.27812	35.4088	11.928	11.1871	5.42174	0.37242	0.336865	0.484642	Q9ESZ0	sp|Q9ESZ0|XRCC1_RAT DNA repair protein XRCC1 OS=Rattus norvegicus GN=Xrcc1 PE=2 SV=2	4e-29
KH.C14.339.v1.B.ND1-1	505	181	439	106	573	224	8.16128	3.77381	6.99001	1.71113	9.26738	4.49297	0.462404	0.244796	0.484816	Q6DRC5	sp|Q6DRC5|USPL1_DANRE SUMO-specific isopeptidase USPL1 OS=Danio rerio GN=uspl1 PE=1 SV=1	0.91
KH.C14.39.v1.B.SL2-1	857	134	1139	301	345	135	7.76662	1.56672	10.17	2.72475	3.129	1.51846	0.201724	0.26792	0.485286	Q8BWQ6	sp|Q8BWQ6|CP062_MOUSE UPF0505 protein C16orf62 homolog OS=Mus musculus PE=2 SV=2	1e-123
KH.C1.101.v1.A.nonSL6-1	196	61	180	58	184	72	4.48115	1.79927	4.05464	1.32456	4.21004	2.04308	0.401521	0.326677	0.485286	Q8VDP6	sp|Q8VDP6|CDIPT_MOUSE CDP-diacylglycerol--inositol 3-phosphatidyltransferase OS=Mus musculus GN=Cdipt PE=1 SV=1	8e-38
KH.C12.481.v1.A.SL2-1	949	285	1055	189	736	288	17.0665	6.61236	18.6929	3.39506	13.2462	6.42819	0.387448	0.181623	0.485286	Q9TSV4	sp|Q9TSV4|TCF19_PIG Transcription factor 19 OS=Sus scrofa GN=TCF19 PE=3 SV=1	0.0002
KH.C5.345.v1.A.SL1-1	922	211	874	355	488	191	12.5738	3.71239	11.7434	4.83587	6.66028	3.23288	0.295247	0.411793	0.485397	Q5ZKJ5	sp|Q5ZKJ5|TM180_CHICK Transmembrane protein 180 OS=Gallus gallus GN=TMEM180 PE=2 SV=1	5e-83
KH.C2.176.v1.A.SL2-1	550	100	723	199	521	204	11.5007	2.69771	14.8952	4.15646	10.9027	5.29432	0.23457	0.279047	0.485597	Q9D9B4	sp|Q9D9B4|CJ011_MOUSE Leucine-rich repeat-containing protein C10orf11 homolog OS=Mus musculus PE=2 SV=1	2e-14
KH.C4.121.v1.A.SL2-1	3824	1117	5517	1849	2824	1106	41.0149	15.4565	58.3006	19.8093	30.3127	14.7231	0.376851	0.339779	0.485706	Q8AVM5	sp|Q8AVM5|VPP1_XENLA V-type proton ATPase 116 kDa subunit a isoform 1 OS=Xenopus laevis GN=atp6v0a1 PE=2 SV=1	0
KH.C2.452.v1.A.SL1-1	762	245	881	274	816	320	11.8526	4.91654	13.5015	4.25715	12.7024	6.17772	0.414806	0.31531	0.486344	Q66KG5	sp|Q66KG5|GMPAB_XENLA Mannose-1-phosphate guanyltransferase alpha-B OS=Xenopus laevis GN=gmppa-b PE=2 SV=1	5e-79
KH.C7.537.v1.C.SL2-1	490	64	522	53	135	53	13.3531	2.25009	14.0153	1.44268	3.68176	1.79259	0.168507	0.102936	0.486884	O60344	sp|O60344|ECE2_HUMAN Endothelin-converting enzyme 2 OS=Homo sapiens GN=ECE2 PE=1 SV=4	2e-12
KH.C10.556.v1.A.SL6-1	872	313	1190	507	972	382	8.05517	3.73024	10.8306	4.67816	8.98586	4.37966	0.463087	0.43194	0.487394	Q8NBS3	sp|Q8NBS3|S4A11_HUMAN Sodium bicarbonate transporter-like protein 11 OS=Homo sapiens GN=SLC4A11 PE=1 SV=2	1e-38
KH.L84.21.v2.A.ND2-1	200	72	330	103	178	70	1.40251	0.651393	2.28001	0.721477	1.2492	0.609247	0.464448	0.316436	0.48771	O75161	sp|O75161|NPHP4_HUMAN Nephrocystin-4 OS=Homo sapiens GN=NPHP4 PE=1 SV=2	6e-44
KH.L122.16.v1.A.SL1-1	1552	315	2087	472	775	305	18.0267	4.72029	23.8832	5.47614	9.00867	4.39686	0.26185	0.229288	0.488069	Q5RKG1	sp|Q5RKG1|SPICE_RAT Spindle and centriole-associated protein 1 OS=Rattus norvegicus GN=Spice1 PE=2 SV=1	0.0005
KH.S1141.1.v2.A.ND1-1	2552	445	3253	1297	1184	466	24.0385	5.4078	30.1896	12.2032	11.1613	5.44793	0.224964	0.404221	0.48811	Q12770	sp|Q12770|SCAP_HUMAN Sterol regulatory element-binding protein cleavage-activating protein OS=Homo sapiens GN=SCAP PE=1 SV=4	2e-45
KH.C8.215.v1.A.ND2-1	620	141	566	84	343	135	11.8854	3.48718	10.6902	1.60846	6.58038	3.21199	0.293401	0.150461	0.488116	A2VE55	sp|A2VE55|S35D2_BOVIN UDP-N-acetylglucosamine/UDP-glucose/GDP-mannose transporter OS=Bos taurus GN=SLC35D2 PE=2 SV=1	2e-31
KH.L44.6.v1.A.ND1-1	2158	520	3852	1061	1289	509	17.1612	5.33498	30.1806	8.4279	10.2585	5.0238	0.310875	0.279249	0.48972	Q8CGM1	sp|Q8CGM1|BAI2_MOUSE Brain-specific angiogenesis inhibitor 2 OS=Mus musculus GN=Bai2 PE=1 SV=2	0.0001
KH.S907.2.v1.A.ND1-1	490	140	397	121	334	132	12.9778	4.78373	10.3596	3.20109	8.85291	4.33907	0.368609	0.308999	0.490129	P02707	sp|P02707|LECH_CHICK Hepatic lectin OS=Gallus gallus PE=1 SV=1	0.003
KH.C5.24.v1.A.SL1-1	769	139	752	248	574	227	16.3327	3.80873	15.736	5.26128	12.2005	5.98378	0.233197	0.334346	0.490453	Q9CR23	sp|Q9CR23|TMEM9_MOUSE Transmembrane protein 9 OS=Mus musculus GN=Tmem9 PE=2 SV=1	5e-07
KH.C8.295.v1.A.ND1-1	2315	432	3293	828	1754	694	30.5785	7.3618	42.8552	10.9246	23.1863	11.3774	0.24075	0.254918	0.490697	Q8IYT2	sp|Q8IYT2|CMTR2_HUMAN Cap-specific mRNA (nucleoside-2'-O-)-methyltransferase 2 OS=Homo sapiens GN=CMTR2 PE=1 SV=2	6e-38
KH.S1028.2.v1.C.SL1-1	1659	503	2145	641	555	220	33.8703	13.2487	43.1465	13.0719	11.3397	5.5746	0.391161	0.302966	0.491601	Q49413	sp|Q49413|HMW1_MYCGE Cytadherence high molecular weight protein 1 OS=Mycoplasma genitalium (strain ATCC 33530 / G-37 / NCTC 10195) GN=hmw1 PE=3 SV=1	0.51
KH.L116.62.v1.A.SL5-1	861	311	713	207	476	189	33.0923	15.4212	26.9997	7.94699	18.3091	9.0158	0.466006	0.294336	0.492423	Q8K4D7	sp|Q8K4D7|PLCZ1_MOUSE 1-phosphatidylinositol 4,5-bisphosphate phosphodiesterase zeta-1 OS=Mus musculus GN=Plcz1 PE=1 SV=1	8.4
KH.L50.19.v1.A.SL1-1	1167	285	1851	589	1328	528	14.3936	4.53501	22.4932	7.25644	16.392	8.08262	0.315071	0.322605	0.493082	O34355	sp|O34355|YTCJ_BACSU Putative amidohydrolase YtcJ OS=Bacillus subtilis (strain 168) GN=ytcJ PE=4 SV=1	4e-12
KH.L153.110.v2.A.SL2-1	618	95	618	242	249	99	15.2628	3.02694	15.0377	5.96995	6.15434	3.03459	0.198321	0.396999	0.493082	A2VDQ7	sp|A2VDQ7|ZN420_BOVIN Zinc finger protein 420 OS=Bos taurus GN=ZNF420 PE=2 SV=1	4e-101
KH.C10.337.v1.A.ND1-1	2665	398	3806	987	1799	718	38.9219	7.49918	54.7661	14.3987	26.2944	13.0149	0.192673	0.262912	0.494967	Q55CD9	sp|Q55CD9|NDH_DICDI Probable NADH dehydrogenase OS=Dictyostelium discoideum GN=DDB_G0270104 PE=3 SV=2	3e-54
KH.S521.2.v1.A.ND1-1	1242	443	1657	369	1897	758	17.5458	8.07403	23.0633	5.207	26.8198	13.2905	0.460168	0.22577	0.495547	Q6GMH0	sp|Q6GMH0|PRP18_DANRE Pre-mRNA-splicing factor 18 OS=Danio rerio GN=prpf18 PE=2 SV=1	1e-26
KH.C3.597.v1.C.SL1-1	1657	278	1819	462	513	205	53.6131	11.6045	57.9866	14.9314	16.6112	8.2323	0.21645	0.257497	0.495587	A8WFU8	sp|A8WFU8|KIF22_DANRE Kinesin-like protein KIF22 OS=Danio rerio GN=kif22 PE=2 SV=1	2e-55
KH.L18.93.v1.A.nonSL3-1	342	66	273	71	155	62	6.40605	1.59493	5.03817	1.32841	2.90557	1.44137	0.248973	0.263668	0.49607	Q96F46	sp|Q96F46|I17RA_HUMAN Interleukin-17 receptor A OS=Homo sapiens GN=IL17RA PE=1 SV=2	0.27
KH.L134.13.v3.A.SL1-1	922	232	943	332	564	226	6.85518	2.22541	6.9079	2.46567	4.19665	2.08552	0.324632	0.356935	0.49695	Q9UKG4	sp|Q9UKG4|S13A4_HUMAN Solute carrier family 13 member 4 OS=Homo sapiens GN=SLC13A4 PE=2 SV=2	8e-49
KH.C1.1191.v1.A.ND1-1	1147	285	1350	428	1045	420	31.0666	9.95886	36.0255	11.5793	28.3258	14.1188	0.320565	0.32142	0.498444	Q9VUL9	sp|Q9VUL9|FUCTA_DROME Glycoprotein 3-alpha-L-fucosyltransferase A OS=Drosophila melanogaster GN=FucTA PE=1 SV=2	2e-09
KH.L153.42.v2.A.SL2-2	756	284	641	241	709	285	18.2365	8.83836	15.2343	5.80691	17.1159	8.53263	0.484653	0.381172	0.498519	Q5R4C3	sp|Q5R4C3|TM50B_PONAB Transmembrane protein 50B OS=Pongo abelii GN=TMEM50B PE=2 SV=1	1e-41
KH.S702.1.v1.A.SL8-1	385	79	356	88	189	76	7.05425	1.86746	6.42668	1.61058	3.46567	1.72831	0.264729	0.250608	0.498695	P42867	sp|P42867|GPT_MOUSE UDP-N-acetylglucosamine--dolichyl-phosphate N-acetylglucosaminephosphotransferase OS=Mus musculus GN=Dpagt1 PE=2 SV=2	1e-64
KH.C4.667.v1.A.SL1-1	2014	541	2605	975	1903	766	24.752	8.57794	31.5432	11.9692	23.4059	11.6842	0.346555	0.379454	0.499199	O15270	sp|O15270|SPTC2_HUMAN Serine palmitoyltransferase 2 OS=Homo sapiens GN=SPTLC2 PE=1 SV=1	6e-114
KH.C3.452.v1.C.ND1-1	1241	309	1911	372	591	238	20.657	6.63572	31.3402	6.1851	9.84506	4.9169	0.321234	0.197353	0.499428	Q1L908	sp|Q1L908|MSTO1_DANRE Protein misato homolog 1 OS=Danio rerio GN=msto1 PE=2 SV=1	1e-21
KH.C1.1076.v1.A.SL3-1	1765	344	2260	712	1388	559	16.6405	4.18422	20.9931	6.70518	13.0962	6.54112	0.251448	0.319399	0.499466	B4F766	sp|B4F766|DYM_RAT Dymeclin OS=Rattus norvegicus GN=Dym PE=2 SV=1	3e-53
